# Supplementary material for: From the first touch to biofilm establishment by the human pathogen Candida glabrata: a genome-wide to nanoscale view
Source: Commun Biol. 2021 Jul 20;4:886. doi: 10.1038/s42003-021-02412-7 (PMC8292413; doi:10.1038/s42003-021-02412-7)
Supplement: Supplementary file 3 — Supplementary Data 1 [file 42003_2021_2412_MOESM3_ESM.xlsx]

## Sheet: Figs 1, 7, 8, S1 and S2
				Rupture Distance (Extend Delay 0s)						Average	Standard Deviation
		KCHR606	Glass	1.89051	1.45657	1.28356	0.941519	0.338272	1.08286	1.16555	0.522609
			PST	0.65523	0.723428	1.69971				0.689329	0.0482227
			SE	0.918347	0.304039	0.501099	0.496839	1.76576	0.441282	0.737895	0.54396
			PVC	1.54484	0.77226	1.74153	0.761119			1.20494	0.512396
		∆efg1	Glass	2.0798	0.478718	0.528073	0.476966	1.17448		0.947607	0.698339
			PST	1.65729	0.602203	0.509823	1.65381	0.85045	1.56985	1.14057	0.545262
			SE	1.73643	1.40622	1.60031	0.484368	0.561343		1.15773	0.591949
			PVC	1.53522	0.694576	0.475312	1.74333	1.23443		1.13657	0.540666
		∆tec1	Glass	0.462719	0.598154	0.373354	0.77148	0.674218		0.575985	0.159881
			PST	1.47134	1.21633	1.20629	0.878724	1.63559		1.28166	0.28877
			SE	1.50563	1.1997	1.61927	1.6169	0.451957		1.27869	0.492851
			PVC	1.59753	1.24648	1.5802	1.71727			1.53537	0.202006
				Adhesion Force (Extend Delay 0s)						Average	Standard Deviation
		KCHR606	Glass	1.60758	0.768322	3.4322	1.29948	0.553779	0.757328	1.40312	1.06875
			PST	18.1977	8.23378	14.076	17.05	14.1709		14.3457	3.86036
			SE	8.66758	0.658254	14.6845	12.6269	8.41109	13.4032	9.74194	5.13023
			PVC	15.9171	24.4343	17.695	24.3742	5.9883	27.5914	19.3334	7.90027
		∆efg1	Glass	1.33919	0.497519	0.614746	0.918055	1.35298		0.944498	0.397449
			PST	5.0176	6.68484	0.807012	13.0013	12.0215	7.37919	7.48523	4.52424
			SE	7.67867	3.32907	3.62189	8.36016	2.69409		5.13677	2.66368
			PVC	8.9057	7.18669	0.246683	10.4479	13.0643		7.97026	4.82781
		∆tec1	Glass	0.747556	0.231992	1.45005	5.85792			2.07188	2.57292
			PST	19.3397	4.84553	16.995	23.1531	19.9086		16.8484	7.06066
			SE	12.8208	1.75871	6.56948	6.25785	6.63135		6.80764	3.93828
			PVC	10.0488	7.03	10.2284	5.77558	14.4754		9.51163	3.37481
				Work of Adhesion (Extend Delay 0s						Average	Standard Deviation
		KCHR606	Glass	1.57467e-15	3.1318e-16	1.33602e-15	3.46305e-16	8.46384e-17	2.9595e-16	6.58461e-16	6.2863e-16
			PST	5.69859e-15	1.90668e-15	6.13057e-15	5.12621e-15	2.95752e-15		4.36391e-15	1.83708e-15
			SE	3.18942e-15	1.47432e-16	2.64039e-15	3.63127e-15	4.67519e-15	3.37741e-15	2.94352e-15	1.52515e-15
			PVC	5.17728e-15	6.78792e-15	7.86413e-15	5.07806e-15	1.67922e-15	9.186e-15	5.9621e-15	2.62426e-15
		∆efg1	Glass	1.44672e-15	1.20763e-16	1.95179e-16	1.52198e-16	4.60577e-16		4.75088e-16	5.59561e-16
			PST	1.8122e-15	2.20265e-15	2.39516e-16	7.54274e-15	3.04944e-15	2.90202e-15	2.9581e-15	2.46191e-15
			SE	5.46368e-15	1.15965e-15	1.43314e-15	2.48341e-15	9.49912e-16		2.29796e-15	1.86528e-15
			PVC	6.38158e-15	2.58712e-15	4.61251e-15	4.04192e-15			4.40578e-15	1.56912e-15
		∆tec1	Glass	2.1743e-16	1.34947e-16	3.94326e-17	5.31032e-16	3.89672e-16		2.62502e-16	1.97701e-16
			PST	6.78007e-15	9.25132e-16	2.15821e-15	8.11309e-15	1.40578e-14		6.40687e-15	5.23661e-15
			SE	3.26404e-15	4.15416e-16	3.67803e-15	2.76923e-15	1.75933e-15		2.37721e-15	1.30984e-15
			PVC	4.24002e-15	1.87879e-15	1.41855e-15	3.48362e-15	9.14382e-15		4.03296e-15	3.07982e-15
				Rupture Distance (Extend Delay 0.5s)					Average	Standard Deviation
		KCHR606	Glass	0.4342	1.58167	0.51473	0.533435		0.766008	0.545475
			PST	0.338984	1.74218	0.686823	0.765574		0.883391	0.601781
			SE	0.593166	1.15651	1.77082			1.1735	0.589013
			PVC	0.954008	1.70572	0.313043	0.78855		0.940331	0.578083
		∆efg1	Glass	0.84311	1.18929	1.62061	0.618596		1.0679	0.436895
			PST	1.69289	0.554047	1.68595	0.895617	1.66048	1.2978	0.536938
			SE	0.812335	1.6345	0.522352			0.98973	0.576907
			PVC	1.71534	0.756089	1.73231			1.40125	0.558787
		∆tec1	Glass	0.880337	1.00702	0.922927			0.936761	0.0644637
			PST	1.48796	1.23162	1.20983	1.26992		1.29983	0.127855
			SE	1.05829	1.19725	1.64582			1.30045	0.307062
			PVC	0.560404	1.19565	1.5917			1.11592	0.520251
				Adhesion Force (Extend Delay 0.5s)					Average	Standard Deviation
		KCHR606	Glass	1.77796	2.33715	4.69046	5.90999		3.67889	1.95063
			PST	14.5774	45.3926	32.7801	28.6745		30.3561	12.6986
			SE	28.1568	18.5406	12.9147			19.8707	7.70761
			PVC	39.3758	27.4385	73.1141	37.3477		44.3191	19.8926
		∆efg1	Glass	5.03746	5.12013	5.65126	7.11415		5.73075	0.961531
			PST	14.4451	2.61019	19.3209	29.2894	13.6147	15.8561	9.68151
			SE	7.04773	7.47316	12.3847			8.96855	2.96615
			PVC	20.9851	10.8586	13.6817			15.1751	5.22583
		∆tec1	Glass	2.04002	5.28419	13.5521			6.95876	5.9359
			PST	35.3177	12.1934	32.2972	38.2384		29.5117	11.7976
			SE	20.3209	9.48933	13.7967			14.5356	5.45346
			PVC	24.6286	23.8025	21.4382			23.2898	1.65582
				Work of Adhesion (Extend Delay 0.5s)					Average	Standard Deviation
		KCHR606	Glass	2.81826e-16	1.23343e-15	1.81538e-15	1.64845e-15		1.24477e-15	6.87009e-16
			PST	2.98352e-15	2.3279e-14	1.20339e-14	5.73125e-15		1.10069e-14	9.01602e-15
			SE	3.61434e-15	6.38624e-15	8.45468e-15			6.15175e-15	2.42868e-15
			PVC	1.32668e-14	1.34043e-14	1.84126e-14	1.45637e-14		1.49118e-14	2.40521e-15
		∆efg1	Glass	8.2622e-16	1.16742e-15	3.00881e-15	7.31796e-16		1.43356e-15	1.06671e-15
			PST	6.93989e-15	7.14407e-16	1.37512e-14	6.07272e-15	6.87035e-15	6.86972e-15	4.63366e-15
			SE	1.941e-15	3.41616e-15	3.61705e-15			2.9914e-15	9.15205e-16
			PVC	1.35321e-14	4.24218e-15	2.46855e-16	6.3467e-15		6.09196e-15	5.56799e-15
		∆tec1	Glass	5.07226e-16	1.95618e-15	3.07249e-15			1.8453e-15	1.28622e-15
			PST	1.43013e-14	2.06715e-15	4.44078e-15	1.60493e-14		9.21462e-15	6.98719e-15
			SE	6.4837e-15	1.3777e-15	8.73216e-15			5.53119e-15	3.76862e-15
			PVC	8.7491e-15	3.21242e-15	9.64692e-15			7.20281e-15	3.48482e-15
				Rupture Distance (Extend Delay 1s)					Average	Standard Deviation
		KCHR606	Glass	0.426935	1.44676	0.444015	0.432708		0.687604	0.506152
			PST	0.321618	0.647896	0.788174	1.75861		0.879075	0.618076
			SE	0.509926	1.04221	1.76633			1.10616	0.630639
			PVC	0.963525	1.84336	1.0783			1.29506	0.478297
		∆efg1	Glass	1.14609	1.54184	1.35444	0.856735		1.22478	0.293819
			PST	1.67514	1.17545	1.20829	1.65736		1.42906	0.274308
			SE	0.955295	1.57637	0.588988			1.04022	0.499139
			PVC	1.6808	0.687176	0.546735	1.71009		1.1562	0.625414
		∆tec1	Glass	0.916663	1.11026	0.926166			0.984364	0.109135
			PST	1.56821	1.19667	1.2044	1.15152		1.2802	0.193415
			SE	0.698465	1.14764	1.66846			1.17152	0.485439
			PVC	0.487821	1.20037	1.62071			1.10297	0.572689
				Adhesion Force (Extend Delay 1s)					Average	Standard Deviation
		KCHR606	Glass	2.30714	3.34561	6.64414	13.096		6.34823	4.86369
			PST	8.28341	41.5357	34.3741	29.3274		28.3801	14.3035
			SE	27.7199	13.747	16.9704			19.4791	7.31646
			PVC	43.6882	28.8026	71.1227	37.2399		45.2134	18.3167
		∆efg1	Glass	5.94587	15.5012	3.1359	4.81783		7.35021	5.55532
			PST	14.0163	2.70041	27.8592	14.2163		14.6981	10.2933
			SE	7.13709	6.76658	12.2592			8.72095	3.06979
			PVC	21.0802	11.605	1.09743	14.3548		12.0344	8.30686
		∆tec1	Glass	3.94144	7.68964	15.8495			9.16018	6.08869
			PST	39.933	13.8771	35.2238	39.579		32.1532	12.3708
			SE	25.3099	14.0631	13.6861			17.6864	6.6049
			PVC	27.0237	29.1892	27.5319			27.915	1.13243
				Work of Adhesion (Extend Delay 1s)					Average	Standard Deviation
		KCHR606	Glass	3.30265e-16	1.76801e-15	1.65502e-15	2.3095e-15		1.5157e-15	8.40326e-16
			PST	2.12245e-14	1.24711e-14	6.04866e-15			1.32481e-14	7.6177e-15
			SE	3.85295e-15	5.12145e-15	1.02367e-14			6.40371e-15	3.37954e-15
			PVC	1.57453e-14	1.52642e-14	1.75994e-14	1.44844e-14		1.57733e-14	1.32362e-15
		∆efg1	Glass	9.30405e-16	3.14562e-15	1.01022e-15	1.11431e-15		1.55014e-15	1.06632e-15
			PST	6.67632e-15	8.15804e-16	1.11932e-14	7.50782e-15		6.54829e-15	4.29627e-15
			SE	2.07363e-15	2.88654e-15	3.7403e-15			2.90016e-15	8.33417e-16
			PVC	1.27125e-14	3.82503e-15	2.40832e-16	6.9164e-15		5.92369e-15	5.28434e-15
		∆tec1	Glass	8.47664e-16	2.56144e-15	4.22668e-15			2.54526e-15	1.68957e-15
			PST	1.78705e-14	2.33127e-15	5.02497e-15	1.77708e-14		1.07494e-14	8.23903e-15
			SE	5.68457e-15	1.71803e-15	9.75691e-15			5.71983e-15	4.01955e-15
			PVC	9.79182e-15	3.97324e-15	1.42508e-14			9.33863e-15	5.15377e-15
				Rupture Distance (Extend Delay 5s)					Average	Standard Deviation
		KCHR606	Glass	0.492048	1.87658	0.415036	0.496157		0.819955	0.705404
			PST	1.6972	1.05403				1.37562	0.454784
			SE	0.416368	0.841171	1.86153			1.03969	0.74275
			PVC	1.00335	2.04984	0.301295	1.39441		1.18723	0.731601
		∆efg1	Glass	1.58192	1.36801	1.58849	1.58488		1.53083	0.108576
			PST	1.65166	1.33683	2.0713	1.7471		1.70172	0.302377
			SE	1.15014	1.62064	0.772259			1.18101	0.425035
			PVC	1.68406	0.721181	1.8265			1.41058	0.601269
		∆tec1	Glass	1.0912	1.1131	1.12335			1.10922	0.0164216
			PST	1.42158	1.16895	1.35592			1.31549	0.131079
			SE	0.904521	1.197	1.77073			1.29075	0.440646
			PVC	0.575051	1.2	1.67548			1.15018	0.551902
				Adhesion Force (Extend Delay 5s)					Average	Standard Deviation
		KCHR606	Glass	3.70696	6.998	8.46634	18.995		9.54156	6.60896
			PST	63.4171	48.1566				55.7869	10.7908
			SE	20.6231	16.2182				18.4207	3.11478
			PVC	57.6798	37.4985	50.7511			48.6431	10.2545
		∆efg1	Glass	10.7797	19.4871	3.73446	4.58298		9.64605	7.27353
			PST	16.525	4.74432	29.7102	18.2875		17.3168	10.2182
			SE	18.041	10.9885				14.5148	4.98687
			PVC	30.0283	13.6351	16.2026			19.9553	8.81739
		∆tec1	Glass	9.35274	12.8623	22.6661			14.9604	6.90022
			PST	15.4999	47.8877	44.7339			36.0405	17.8584
			SE	30.0977	12.417	17.6798			20.0648	9.07847
			PVC	44.0424	40.9313	33.1607			39.3781	5.60469
				Work of Adhesion (Extend Delay 5s)					Average	Standard Deviation
		KCHR606	Glass	5.96596e-16	3.69189e-15	3.31034e-15	4.20884e-15		2.95192e-15	1.61281e-15
			PST	3.40371e-14	1.73912e-14	4.27475e-15			1.85677e-14	1.4916e-14
			SE	6.94857e-15	7.76056e-15				7.35456e-15	5.74162e-16
			PVC	2.29836e-14	2.06207e-14	2.70506e-14	2.16666e-14		2.30804e-14	2.81783e-15
		∆efg1	Glass	2.12195e-15	4.25096e-15	1.21233e-15	2.81548e-15		2.60018e-15	1.28144e-15
			PST	8.68023e-15	1.5733e-15	1.19813e-14	1.05099e-14		8.18618e-15	4.61074e-15
			SE	4.5187e-15	3.6764e-15				4.09755e-15	5.95599e-16
			PVC	1.76615e-14	5.10207e-15	9.22304e-15			1.06622e-14	6.40222e-15
		∆tec1	Glass	2.17438e-15	4.63895e-15	7.77331e-15			4.86222e-15	2.80613e-15
			PST	2.90001e-15	7.29679e-15	2.83138e-14			1.28369e-14	1.35825e-14
			SE	1.21789e-14	2.50142e-15	1.22834e-14			8.98789e-15	5.61769e-15
			PVC	1.8614e-14	6.47481e-15	2.04928e-14			1.51939e-14	7.60915e-15

## Sheet: Figs 3 9, 10 and S2
			Z100_5s									Z100_10s
			Adhesion Force					Average	Standard Deviation			Adhesion Force					Average	Standard Deviation
		KCHR606	613.444	551.595	488.797			551.278	62.3241		KCHR606	283.586	248.071	334.642			288.766	43.5175
		∆efg1	337.532	354.746	344.932			345.737	8.63491
		∆tec1	655.838	706.217	481.009	374.914		554.495	153.774			Work of Adhesion					Average	Standard Deviation
											KCHR606	1.86905e-15	1.06706e-14	2.19645e-15	4.58446e-15	6.46286e-15	5.15668e-15	3.60583e-15
			Work of Adhesion					Average	Standard Deviation
		KCHR606	1.89177e-15	9.78369e-15	8.64333e-15	3.61001e-15		5.9822e-15	3.825e-15			Number of Jumps					Average	Standard Deviation
		∆efg1	1.1504e-15	9.8085e-16	1.34068e-15			1.15731e-15	1.80016e-16		KCHR606	2.66124	2.24991	2.24962			2.38693	0.237566
		∆tec1	4.01886e-15	4.95368e-15	3.3184e-15			4.09698e-15	8.20431e-16
												Number of Tethers					Average	Standard Deviation
			Number of Jumps					Average	Standard Deviation		KCHR606	0.10114	3.46613	1.71213	2.07593	1.81844	1.83475	1.19794
		KCHR606	1.24005	1.20932	2.45558			1.63499	0.710824
		∆efg1	0.258966	0.253083	0.253824			0.255291	0.0032043			Rupture Distance					Average	Standard Deviation
		∆tec1	1.31002	1.18484	0.906663	1.30118		1.17568	0.188195		KCHR606	8.61022	89.7555	30.6864	41.667	40.1749	42.1788	29.6932
			Number of Tethers					Average	Standard Deviation
		KCHR606	3.55676	2.30905	1.81056			2.55879	0.899488
		∆efg1	0.902617	0.847215	0.913231			0.887688	0.0354498
		∆tec1	1.25016	2.16986	0.9	2.32999	0.926796	1.51536	0.686914
			Rupture Distance					Average	Standard Deviation
		KCHR606	8.86913	8.77315	68.5119	68.5321	18.5355	34.6444	31.1792
		∆efg1	5.02493	9.51944	4.6764			6.40692	2.70115
		∆tec1	9.88695	36.6148	34.7437	17.4458		24.6728	13.1007
			Z100_30s									Z100_60s
			Adhesion Force					Average	Standard Deviation			Adhesion Force					Average	Standard Deviation
		KCHR606	275.027	611.827	228.378			371.744	209.222		KCHR606	152.938	652.245	604.512			469.899	275.531
			Work of Adhesion					Average	Standard Deviation			Work of Adhesion					Average	Standard Deviation
		KCHR606	5.02138e-15	2.19312e-14	2.50005e-15			9.81753e-15	1.05662e-14		KCHR606	1.88886e-15	5.35553e-15	5.83763e-15			4.36067e-15	2.15418e-15
			Number of Jumps					Average	Standard Deviation			Number of Jumps					Average	Standard Deviation
		KCHR606	2.73349	3.82042	3.64937			3.40109	0.584455		KCHR606	1.52213	2.24965	1.23083			1.66754	0.524746
			Number of Tethers					Average	Standard Deviation			Number of Tethers					Average	Standard Deviation
		KCHR606	0.0916355	2.55724	3.53538	2.26232		2.11164	1.45244		KCHR606	0.161466	0.0971459	2.21692	2.43484		1.22759	1.27158
			Rupture Distance					Average	Standard Deviation			Rupture Distance					Average	Standard Deviation
		KCHR606	43.5814	74.9823	20.9851			46.5162	27.118		KCHR606	40	48.957				44.4785	6.33358

## Sheet: Fig 4
				Corrected Absorbance																				Average	Standard Deviation
			KUE100+vv	0.380227	0.403227	0.368227	0.453227	0.573227	0.345227	0.377227	0.260227	0.309038	0.571038	0.459038	0.366038	0.507038	0.328038	0.504038	0.415038	0.515038	0.206038			0.407845	0.102011
			KUE100+CgTEC1	0.668227	0.637227	0.660227	0.692227	0.774227	0.553227	0.681227	0.695227	0.574227	0.505038	0.646038	0.633038	0.611038	0.694038	0.608038	0.537038	0.572038	0.544038			0.627022	0.0698908
			Δcgtec1+vv	0.217227	0.401227	0.255227	0.281227	0.362227	0.370227	0.139227	0.267227	0.406227	0.219227	0.351038	0.405038	0.379038	0.465038	0.437038	0.442038	0.345038	0.325038	0.213038		0.330612	0.0917365
			Δcgtec1+CgTEC1	0.501227	0.557227	0.554227	0.618227	0.517227	0.560227	0.529227	0.590227	0.580227	0.542038	0.677038	0.670038	0.571038	0.509038	0.472038	0.562038	0.564038	0.581038	0.546038		0.563286	0.0516522
			KUE100+vv	0.43225	0.38625	0.47425	0.56925	0.44425	0.51425	0.42225	0.55125	0.41725	0.52825	0.42925	0.32725	0.51225	0.42025	0.41425	0.45925	0.45525	0.47925			0.457583	0.0608933
			KUE100+CgEFG1	0.40125	0.66925	0.64725	0.41425	0.47925	0.46125	0.57025	0.63525	0.78525	0.65725	0.50125	0.75725	0.43325	0.48725	0.42425	0.50025	0.38425	0.38625			0.533028	0.128778
			Δcgefg1+vv	0.23125	0.26725	0.34425	0.26325	0.22425	0.24025	0.28225	0.35725	0.24425	0.44525	0.25125	0.33525	0.30525	0.38925	0.32825	0.23725					0.296625	0.0644876
			Δcgefg1+CgEFG1	0.37125	0.59125	0.45925	0.62225	0.40825	0.44025	0.38725	0.52625	0.36625	0.41225	0.36925	0.38025	0.32725	0.66225	0.34225	0.40525	0.35625	0.53025	0.38825	0.43325	0.43895	0.0967727

## Sheet: Fig 5
			% of Adhesion					Average	Standard Deviation
		KUE100	24.2501	21.6324	19.1718	19.9194		21.2434	2.25359
		∆cgefg1	12.8777	15.6018	16.6914	13.7258		14.7242	1.73652
		∆cgtec1	15.6971	18.6166	18.0348	16.9727		17.3303	1.28403
		L5U1 + vv	21.7753	27.0112	27.7607	25.3162	26.5128	25.6753	2.35447
		L5U1 + CgEFG1	27.5818	39.4552	33.4786	31.4241		32.985	4.95776
		L5U1 + CgTEC1	35.4286	34.361	37.0732	31.0732		34.484	2.53278

## Sheet: Fig 6 A, B, C
		Planktonic						Biofilm 6h						Biofilm 24h						Biofilm 48h
		1º Ensaio						1º Ensaio						1º Ensaio						1º Ensaio
			Gene	Ct	ΔCt	ΔΔCt	Expressão		Gene	Ct	ΔCt	ΔΔCt	Expressão		Gene	Ct	ΔCt	ΔΔCt	Expressão		Gene	Ct	ΔCt	ΔΔCt	Expressão
		wt	ACT1	20.8645				wt	ACT1	20.2982				wt	ACT1	20.9724				wt	ACT1	19.1325
			PWP5	26.2112	5.34669	0	1		PWP5	23.8323	3.53415	-1.81254	3.51259		PWP5	22.7598	1.78737	-3.55932	11.7886		PWP5	19.9105	0.778027	-4.56866	23.7303
			AED2	25.9996	5.13512	0	1		AED2	22.8251	2.52692	-2.6082	6.09741		AED2	21.4327	0.460295	-4.67482	25.5424		AED2	19.1239	-0.00860405	-5.14372	35.3521
			BMT3	27.1719	6.30738	0	1		BMT3	23.6023	3.30408	-3.00329	8.01828		BMT3	18.9528	-2.01958	-8.32696	321.118		BMT3	21.0763	1.94382	-4.36356	20.5855
			AWP13	24.8081	3.94363	0	1		AWP13	22.9262	2.62797	-1.31566	2.48917		AWP13	20.406	-0.566473	-4.51011	22.7865		AWP13	19.9238	0.791353	-3.15228	8.89059
		Δtec1	ACT1	25.7212				Δtec1	ACT1	19.8507				Δtec1	ACT1	21.2834				Δtec1	ACT1	21.4404
			PWP5	27.2408	1.51966	-3.82703	14.1922		PWP5	22.7753	2.92462	-0.609531	1.52576		PWP5	22.405	1.12159	-0.665777	1.58642		PWP5	21.8693	0.428911	-0.349115	1.27378
			AED2	27.1507	1.42952	-3.7056	13.0466		AED2	22.7535	2.90284	0.375914	0.770617		AED2	21.9764	0.693066	0.232771	0.850999		AED2	21.516	0.0755291	0.0841331	0.943351
			BMT3	27.6602	1.939	-4.36837	20.6544		AWP13	22.3287	2.47805	-0.149921	1.10951		AWP13	21.183	-0.100353	0.46612	0.723909
			AWP13	27.1491	1.42796	-2.51567	5.71865	Δefg1_2	ACT1	21.4976				Δefg1_2	ACT1	21.4449					AWP13	21.8518	0.4114	-0.379953	1.3013
		Δefg1_2	ACT1	20.6308					PWP5	21.163	-0.334576	-3.86872	14.6084		PWP5	23.2593	1.81439	0.0270252	0.981442	Δefg1_2	ACT1	21.9215
			PWP5	25.4229	4.79219	-0.554495	1.46865		AED2	21.7	0.202408	-2.32451	5.00897		AED2	21.9169	0.472036	0.0117416	0.991894		PWP5	22.5058	0.584249	-0.193777	1.14375
			AED2	24.922	4.29127	-0.843851	1.79483		BMT3	22.2335	0.735939	-2.56815	5.93047		BMT3	37.1161	15.6712	17.6908	4.72646e-06		AED2	22.8257	0.904167	0.912771	0.531164
			BMT3	25.3304	4.69965	-1.60773	3.04772		AWP13	21.2052	-0.292418	-2.92039	7.57048		AWP13	21.6966	0.251774	0.818247	0.567131		BMT3	23.9281	2.00659	0.0627689	0.957425
			AWP13	25.0729	4.44211	0.498476	0.707854														AWP13	21.3693	-0.552231	-1.34358	2.53781
								2º Ensaio						2º Ensaio
		2º Ensaio							Gene	Ct	ΔCt	ΔΔCt	Expressão		Gene	Ct	ΔCt	ΔΔCt	Expressão	2º Ensaio
			Gene	Ct	ΔCt	ΔΔCt	Expressão	wt	ACT1	20.3211				wt	ACT1	20.9912					Gene	Ct	ΔCt	ΔΔCt	Expressão
		wt	ACT1	21.9347					PWP5	23.1934	2.87227	-0.744709	1.67564		PWP5	22.7792	1.78797	-1.82901	3.55294	wt	ACT1	22.4843
			PWP5	25.5516	3.61698	0	1		AED2	22.5392	2.2181	-0.887421	1.84987		AED2	22.4877	1.49648	-1.60904	3.05048		PWP5	22.3663	-0.118004	-3.73498	13.315
			AED2	25.0402	3.10552	0	1		BMT3	23.4063	3.08517	-0.825211	1.77179		BMT3	19.7114	-1.27978	-5.19015	36.5083		AED2	22.1215	-0.362839	-3.46836	11.0683
			BMT3	25.845	3.91038	0	1		AWP13	22.0764	1.75522	-1.23126	2.34772		AWP13	20.2449	-0.746313	-3.73279	13.2948		BMT3	23.6282	1.14387	-2.76651	6.80458
			AWP13	24.9211	2.98648	0	1	Δtec1	ACT1	20.6501				Δtec1	ACT1	21.2957					AWP13	22.675	0.190733	-2.79575	6.9439
		Δtec1	ACT1	25.5421					PWP5	21.3414	0.69128	-2.18099	4.53465		PWP5	22.9428	1.64708	-0.14089	1.10259	Δtec1	ACT1	21.5127
			PWP5	25.2707	-0.271399	-3.88838	14.8088		AED2	21.945	1.29494	-0.923159	1.89626		AED2	21.2957	1.90735e-06	-1.49648	2.82154		PWP5	21.6017	0.0889435	0.206947	0.866368
			AED2	25.0496	-0.492441	-3.59796	12.1086		AWP13	21.6461	0.995998	-0.75922	1.69258		AWP13	21.4447	0.148994	0.895308	0.537633		AED2	21.8591	0.346426	0.709265	0.611632
			BMT3	25.9129	0.370844	-3.53953	11.628	Δefg1_2	ACT1	21.3812				Δefg1_2	ACT1	21.906
			AWP13	25.381	-0.161085	-3.14756	8.86158		PWP5	20.7029	-0.678362	-3.55063	11.7178		PWP5	23.0422	1.13613	-0.651838	1.57117		AWP13	22.0302	0.517471	0.326738	0.797337
		Δefg1_2	ACT1	20.747					AED2	21.5575	0.176308	-2.04179	4.11757		AED2	21.7387	-0.167309	-1.66379	3.16849	Δefg1_2	ACT1	21.6695
			PWP5	25.3553	4.6083	0.99132	0.503017		BMT3	21.9121	0.530844	-2.55432	5.87392		BMT3	21.4187	-0.487318	0.792458	0.57736		PWP5	22.3453	0.675817	0.793821	0.576814
			AED2	24.6535	3.90643	0.800905	0.573989		AWP13	21.1307	-0.250549	-2.00577	4.01602		AWP13	22.9238	1.01772	1.76404	0.294423		AED2	22.5799	0.910437	1.27328	0.413719
			BMT3	25.6256	4.87861	0.968231	0.511132														BMT3	Undetermined	#VALUE!	#VALUE!	#VALUE!
			AWP13	24.9824	4.23534	1.24886	0.42078	3º Ensaio						3º Ensaio							AWP13	21.6816	0.0120506	-0.178682	1.13185
									Gene	Ct	ΔCt	ΔΔCt	Expressão		Gene	Ct	ΔCt	ΔΔCt	Expressão
		3º Ensaio						wt	ACT1	20.1557				wt	ACT1	20.7164				3º Ensaio
			Gene	Ct	ΔCt	ΔΔCt	Expressão		PWP5	23.9676	3.81194	0.593042	0.662943		PWP5	21.8788	1.16248	-2.05641	4.1595		Gene	Ct	ΔCt	ΔΔCt	Expressão
		wt	ACT1	21.9461					AED2	22.4588	2.30315	-0.47164	1.38668		AED2	21.3526	0.636282	-2.1385	4.40305	wt	ACT1	21.6471
			PWP5	25.165	3.21889	0	1		BMT3	23.2882	3.13256	-0.80706	1.74964		BMT3	18.6663	-2.05009	-5.98971	63.5451		PWP5	21.2919	-0.35519	-3.57408	11.9098
			AED2	24.7209	2.77479	0	1		AWP13	21.9171	1.76146	-0.813633	1.75763		AWP13	20.0933	-0.623116	-3.19821	9.1782		AED2	20.7741	-0.873013	-3.6478	12.5342
			BMT3	25.8857	3.93962	0	1	Δtec1	ACT1	19.9235				Δtec1	ACT1	21.4922					BMT3	21.9355	0.288401	-3.65122	12.564
			AWP13	24.5212	2.5751	0	1		PWP5	21.2712	1.34766	-2.46427	5.51849		PWP5	22.3741	0.881907	-0.280577	1.21468		AWP13	21.4347	-0.212395	-2.78749	6.90428
		Δtec1	ACT1	20.4016					AED2	21.8909	1.96733	-0.335817	1.26209		AED2	22.074	0.581844	-0.0544376	1.03845	Δtec1	ACT1	21.1365
			PWP5	25.9249	5.52331	2.30442	0.202442		AWP13	21.1612	1.23767	-0.523792	1.43773		AWP13	21.4416	-0.0505676	0.572548	0.672428		PWP5	21.4026	0.266115	0.621305	0.650082
			AED2	25.8675	5.46593	2.69115	0.15484	Δefg1_2	ACT1	21.8596				Δefg1_2	ACT1	23.0593					AED2	20.9157	-0.220774	0.652239	0.636292
			BMT3	26.8741	6.47246	2.53284	0.172798		PWP5	21.7566	-0.103037	-3.91497	15.0843		PWP5	23.743	0.683685	-0.478798	1.39358
			AWP13	24.9753	4.57367	1.99858	0.250247		AED2	21.6357	-0.223959	-2.52711	5.76414		AED2	23.2165	0.157179	-0.479103	1.39388		AWP13	21.1874	0.0509834	0.263378	0.833135
		Δefg1_2	ACT1	21.9275					BMT3	21.9639	0.104256	-3.02831	8.15851		BMT3	23.3724	0.313028	2.36312	0.194371	Δefg1_2	ACT1	21.6808
			PWP5	24.8869	2.9595	-0.259396	1.19698		AWP13	21.2088	-0.650858	-2.41232	5.3233		AWP13	22.8445	-0.21487	0.408245	0.753539		PWP5	22.7717	1.09091	1.4461	0.367012
			AED2	23.9236	1.9961	-0.778683	1.71556														AED2	21.4015	-0.279301	0.593712	0.662636
			BMT3	24.6718	2.74437	-1.19525	2.28984														BMT3	24.2456	2.56477	2.27637	0.206416
			AWP13	24.4053	2.47787	-0.0972233	1.06971														AWP13	21.0596	-0.621185	-0.408791	1.32757
									PWP5				7.57048			PWP5
			PWP5							Média	Desvio Padrão		4.01602				Média	Desvio Padrão			PWP5
				Média	Desvio Padrão				wt	1.95039	1.44456		5.3233			wt	3.85622	0.428901				Média	Desvio Padrão
			wt	1	0				Δtec1	3.85963	2.08019					Δtec1	1.30123	0.253264			wt	16.3184	6.45724
			Δtec1	14.5005	0.435955				Δefg1	13.8035	1.82185					Δefg1	1.3154	0.302538			Δtec1	0.930077	0.316692
			Δefg1	1.05622	0.49797																Δefg1	0.69586	0.401822
									AED2							AED2
			AED2							Média	Desvio Padrão						Média	Desvio Padrão			AED2
				Média	Desvio Padrão				wt	1.61828	0.327519					wt	3.72677	0.956414				Média	Desvio Padrão
			wt	1	0				Δtec1	1.30966	0.564328					Δtec1	1.57033	1.08762			wt	19.6515	13.6168
			Δtec1	12.5776	0.663226				Δefg1	4.96356	0.824226					Δefg1	1.85142	1.15819			Δtec1	0.730425	0.184811
			Δefg1	1.36146	0.683123																Δefg1	0.53584	0.124524
									AWP13							AWP13
			AWP13							Média	Desvio Padrão						Média	Desvio Padrão			AWP13
				Média	Desvio Padrão				wt	2.19817	0.38802					wt	15.0865	6.97881				Média	Desvio Padrão
			wt	1	0				Δtec1	1.41327	0.292302					Δtec1	0.644657	0.0961934			wt	7.57959	1.13553
			Δtec1	4.94349	4.35768				Δefg1	5.6366	1.79782					Δefg1	0.538364	0.230906			Δtec1	0.977257	0.281199
			Δefg1	0.732782	0.325184																Δefg1	1.66574	0.761545

## Sheet: Fig 6D
		1	2	3	4	5	6	7	8	9	10	11	12
	A	2.799	2.611	3.033	2.724	1.951	2.05	1.518	2.194	2.124	2.343	0.892	0.884
	B	2.469	2.71	2.04	2.728	2.982	2.399	2.5	2.339	2.715	2.486	0.889	0.887
	C	3.021	2.662	1.752	3.031	3.119	2.126	2.062	3.196	2.013	2.49	0.956	0.944
	D	2.973	3.102	2.588	3.161	3.266	3.326	2.802	2.858	2.904	2.492	0.952	0.948
	E	2.762	3.038	2.035	3.353	2.965	3.242	2.792	2.915	2.301	2.353	1.098	1.032
	F	3.134	2.773	3.5	3.204	3.238	2.473	2.134	3.341	2.276	2.406	1.184	1.044
	G	3.12	3.463	3.425	3.5	3.5	3.5	3.313	2.894	2.35	2.341	1.136	1.126
	H	2.909	3.172	3.5	3.349	3.396	3.128	3.232	2.895	2.49	2.366	1.08	1.031
		1	2	3	4	5	6	7	8	9	10	11	12
	A	1.957	1.795	2.162	1.931	1.08	1.198	0.991	1.3	1.23	2.042	0.895	0.893
	B	1.598	1.828	1.156	1.743	2.077	1.551	1.66	1.455	1.79	2.201	0.893	0.893
	C	2.171	1.853	0.909	2.129	2.253	1.297	1.161	2.337	1.127	2.447	0.903	0.889
	D	2.003	2.294	1.631	2.223	2.298	2.46	1.896	1.982	2.061	2.302	0.924	0.895
	E	1.813	2.06	1.086	2.306	2.047	2.321	1.795	1.898	2.24	2.32	0.973	0.924
	F	2.277	1.819	2.444	2.284	2.295	1.489	1.211	2.329	2.223	2.349	0.973	0.921
	G	2.109	2.551	2.467	2.808	2.667	2.896	2.388	1.952	2.244	2.255	0.952	0.961
	H	1.983	2.254	2.628	2.404	2.393	2.146	2.334	1.991	2.384	2.262	0.933	0.877
		1	2	3	4	5	6	7	8	9	10	B	B	Média Brancos por linha
	wt	0.842	0.816	0.871	0.793	0.871	0.852	0.527	0.894	0.894	0.301	-0.003	-0.009	-0.006
	awp13	0.871	0.882	0.884	0.985	0.905	0.848	0.84	0.884	0.925	0.285	-0.004	-0.006	-0.005
	pwp5	0.85	0.809	0.843	0.902	0.866	0.829	0.901	0.859	0.886	0.043	0.053	0.055	0.054
	wt	0.97	0.808	0.957	0.938	0.968	0.866	0.906	0.876	0.843	0.19	0.028	0.053	0.0405
	awp13	0.949	0.978	0.949	1.047	0.918	0.921	0.997	1.017	0.061	0.033	0.125	0.108	0.1165
	aed2	0.857	0.954	1.056	0.92	0.943	0.984	0.923	1.012	0.053	0.057	0.211	0.123	0.167
	aed2	1.011	0.912	0.958	0.692	0.833	0.604	0.925	0.942	0.106	0.086	0.184	0.165	0.1745
	pwp5	0.926	0.918	0.872	0.945	1.003	0.982	0.898	0.904	0.106	0.104	0.147	0.154	0.1505
		1	2	3	4	5	6	7	8	9	10
	wt	0.848	0.822	0.877	0.799	0.877	0.858		0.9	0.9
	awp13	0.876	0.887	0.889	0.99	0.91	0.853	0.845	0.889	0.93
	pwp5	0.796	0.755	0.789	0.848	0.812	0.775	0.847	0.805	0.832
	wt	0.9295	0.7675	0.9165	0.8975	0.9275	0.8255	0.8655	0.8355	0.8025
	awp13	0.8325	0.8615	0.8325	0.9305	0.8015	0.8045	0.8805	0.9005
	aed2	0.69	0.787	0.889	0.753	0.776	0.817	0.756	0.845
	aed2	0.8365	0.7375	0.7835	0.5175	0.6585	0.4295	0.7505	0.7675
	pwp5	0.7755	0.7675	0.7215	0.7945	0.8525	0.8315	0.7475	0.7535
						Média	Desvio Padrão
					wt	0.861676	0.0479006
					pwp5	0.794294	0.0390957	****
					aed2	0.737125	0.118347	***
					awp13	0.877235	0.0482436

## Sheet: Fig S6
	Well	Sample Name	Target Name	Cт			24h Biofilm
	A5	Sample 1	ACT1	21.9202			1º Assay
	A6	Sample 9	ACT1	21.232			Strain	Target Gene	Cт	∆Ct	∆∆Ct	Expressão
	A7	Sample 17	LACZ	32.9274		L5U1	promAWP13	ACT1	21.9202					L5U1	Média	Desvio Padrão
	B5	Sample 2	ACT1	21.375				LACZ	32.7957	10.8755	0	1		promAWP13	1	0
	B6	Sample 10	LACZ	32.7957			632	ACT1	21.375					promAWP13+mut632	0.837635	0.171245
	B7	Sample 18	LACZ	32.7361				LACZ	32.6997	11.3246	0.449102	0.732498		promAWP13+mut632+mut159	0.78623	0.118139
	C5	Sample 3	ACT1	20.975			632+159	ACT1	20.975
	C6	Sample 11	LACZ	32.6997				LACZ	32.3644	11.3894	0.51392	0.700317
	D5	Sample 4	ACT1	20.0768
	D6	Sample 12	LACZ	32.3644
	E5	Sample 5	ACT1	19.9337			24h Biofilm							L5U1
	E6	Sample 13	LACZ	32.659			2º Assay							promAWP13	1	1	1
	F5	Sample 6	ACT1	19.7579			Strain	Target Gene	Cт	∆Ct	∆∆Ct	Expressão		promAWP13+mut632	0.732498	1.03524	0.745171
	F6	Sample 14	LACZ	32.4658		L5U1	promAWP13	ACT1	20.0768					promAWP13+mut632+mut159	0.700317	0.737421	0.920953
	G5	Sample 7	ACT1	21.2885				LACZ	32.659	12.5821	0	1			1	1	1
	G6	Sample 15	LACZ	32.7795			632	ACT1	19.9337
	H5	Sample 8	ACT1	21.1178				LACZ	32.4658	12.5322	-0.0499611	1.03524
	H6	Sample 16	LACZ	32.6738			632+159	ACT1	19.7579
								LACZ	32.7795	13.0216	0.43944	0.737421		Anova: factor único
														SUMÁRIO
							24h Biofilm							Grupos	Contagem	Soma	Média	Variância
							3º Assay							Linha 1	3	3	1	0
							Strain	Target Gene	Cт	∆Ct	∆∆Ct	Expressão		Linha 2	3	2.51291	0.837635	0.0293249
						L5U1	promAWP13	ACT1	21.2885
								LACZ	32.6738	11.3853	0	1
							632	ACT1	21.1178					ANOVA
								LACZ	32.9274	11.8096	0.424356	0.745171		Fonte de variação	SQ	gl	MQ	F	valor P	F crítico
							632+159	ACT1	21.232					Entre grupos	0.0395433	1	0.0395433	2.69691	0.175887	7.70865
								LACZ	32.7361	11.5041	0.118801	0.920953		Dentro de grupos	0.0586498	4	0.0146625
														Total	0.0981932	5
														Anova: factor único
														SUMÁRIO
														Grupos	Contagem	Soma	Média	Variância
														Linha 1	3	2.35869	0.78623	0.0139568
														Linha 2	3	3	1	0
														ANOVA
														Fonte de variação	SQ	gl	MQ	F	valor P	F crítico
														Entre grupos	0.0685463	1	0.0685463	9.82265	0.035046	7.70865
														Dentro de grupos	0.0279135	4	0.00697839
														Total	0.0964598	5

## Sheet: Fig S7
				Time (h)	0	1	2.75	4.25	5.75	7.25	17.75	18.75	19.75	20.75	Escala logaritmica
			D.O.	KCHR606	0.049	0.102	0.276	0.581	1.134	4.38	23.48	26.55	27.4	25.9	-1.3098	-0.9914	-0.559091	-0.235824	0.0546131	0.641474	1.3707	1.42406	1.43775	1.4133
				∆cgefg1	0.034	0.066	0.16	0.436	0.68	2.25	18.16	21.25	21.55	22.45	-1.46852	-1.18046	-0.79588	-0.360514	-0.167491	0.352183	1.25912	1.32736	1.33345	1.35122
				∆cgtec1	0.048	0.094	0.253	0.696	1.21	4.05	21.48	23.45	24.5	24.9	-1.31876	-1.02687	-0.596879	-0.157391	0.0827854	0.607455	1.33203	1.37014	1.38917	1.3962

## Sheet: Fig S8 a
			𝜇g/mL	𝜇g na ECM	Average 𝜇g/mL	Standard Deviation			wt vs ∆tec1	14.7872	6.06383	9.68085	13.617	9.57447	6.06383	11.2685	6.08333	8.49074
		wt	7.39362	14.7872	9.51443	3.2476				4.46809	5.10638	4.04255	2.75	4.50926	5.62037	2.84259	3.39815	5.25
			3.03191	6.06383
			4.84043	9.68085						Anova: Single Factor
			6.80851	13.617
			4.78723	9.57447						SUMMARY
			3.03191	6.06383						Groups	Count	Sum	Average	Variance
			5.63426	11.2685						Row 1	9	85.6298	9.51443	10.5469
			3.04167	6.08333						Row 2	9	37.9874	4.22082	1.08974
			4.24537	8.49074
		∆efg1	4.89362	9.78723	9.51416	2.25624
			5.90426	11.8085						ANOVA
			5.42553	10.8511						Source of Variation	SS	df	MS	F	P-value	F crit
			5.26596	10.5319						Between Groups	126.1	1	126.1	21.6729	0.000263915	4.494
			4.75463	9.50926						Within Groups	93.0934	16	5.81834
			4.66204	9.32407
			2.39352	4.78704						Total	219.193	17
		∆tec1	2.23404	4.46809	4.22082	1.04391
			2.55319	5.10638
			2.02128	4.04255
			1.375	2.75
			2.25463	4.50926
			2.81019	5.62037
			1.4213	2.84259
			1.69907	3.39815
			2.625	5.25
									wt vs ∆efg1	14.7872	6.06383	9.68085	13.617	9.57447	6.06383	11.2685	6.08333	8.49074
										9.78723	11.8085	10.8511	10.5319	9.50926	9.32407	4.78704
										Anova: Single Factor
										SUMMARY
										Groups	Count	Sum	Average	Variance
										Row 1	7	71.0558	10.1508	11.4534
										Row 2	7	66.5991	9.51416	5.0906
										ANOVA
										Source of Variation	SS	df	MS	F	P-value	F crit
										Between Groups	1.4187	1	1.4187	0.171507	0.686082	4.74723
										Within Groups	99.2638	12	8.27198
										Total	100.682	13

## Sheet: Fig S8 b
				ug ECM	Average	Standard Deviation
			KUE100	270.889	225.148	153.713		wt vs efg1	270.889	186.444	402	106.444	477.556	106.444	115.333	106.444	133.111	133.111	148.667	515.333
				186.444					42	102	130.889	115.333	170.889	88.6667	128.667	206.444	124.222	110.889	82	73.1111	57.5556	168.667
				402
				106.444					Anova: Single Factor
				477.556
				106.444					SUMMARY
				115.333					Groups	Count	Sum	Average	Variance
				106.444					Row 1	12	2701.78	225.148	23627.8
				133.111					Row 2	12	1375.11	114.593	1914.55
				133.111
				148.667
				515.333					ANOVA
			∆cgefg1	42	114.381	45.7726			Source of Variation	SS	df	MS	F	P-value	F crit
				102					Between Groups	73335.2	1	73335.2	5.74224	0.0254982	4.30095
				130.889					Within Groups	280966	22	12771.2
				115.333
				170.889					Total	354301	23
				88.6667
				128.667
				206.444
				124.222				wt vs tec1	270.889	186.444	402	106.444	477.556	106.444	115.333	106.444	133.111	133.111	148.667	515.333
				110.889					322	246.444	119.778	155.333	117.556	224.222	190.889	270.889	266.444	159.778	102	190.889	237.556	93.1111
				82
				73.1111					Anova: Single Factor
				57.5556
				168.667					SUMMARY
			∆cgtec1	322	192.635	71.1227			Groups	Count	Sum	Average	Variance
				246.444					Row 1	12	2701.78	225.148	23627.8
				119.778					Row 2	12	2366.22	197.185	4871.68
				155.333
				117.556
				224.222					ANOVA
				190.889					Source of Variation	SS	df	MS	F	P-value	F crit
				270.889					Between Groups	4691.56	1	4691.56	0.329239	0.571928	4.30095
				266.444					Within Groups	313494	22	14249.7
				159.778
				102					Total	318186	23
				190.889
				237.556
				93.1111
