# Supplementary material for: From the first touch to biofilm establishment by the human pathogen Candida glabrata: a genome-wide to nanoscale view
Source: Commun Biol. 2021 Jul 20;4:886. doi: 10.1038/s42003-021-02412-7 (PMC8292413; doi:10.1038/s42003-021-02412-7)
Supplement: Supplementary file 4 — Supplementary Data 2 [file 42003_2021_2412_MOESM4_ESM.xlsx]

## Sheet: Wt_P-vs-Wt_B
	Candida glabrata				Candida albicans			Saccharomyces cerevisiae
Group	ID	log2FoldChange	Name	Definition	orth ID	orth name	orth Definition	orth ID	orth Name	orth Definition
Intracellular traficking	CAGL0K01793g	-4.87534231517871		Ortholog(s) have endoplasmic reticulum localization	C2_05290C		Ortholog(s) have Golgi apparatus, endoplasmic reticulum localization	YDL018C	ERP3	Protein with similarity to Emp24p and Erv25p; member of the p24 family involved in ER to Golgi transport
	CAGL0G01452g	-4.79616534397481		Ortholog(s) have role in ER to Golgi vesicle-mediated transport and ER to Golgi transport vesicle, Golgi apparatus, endoplasmic reticulum localization	C1_06480C		Ortholog(s) have role in ER to Golgi vesicle-mediated transport and ER to Golgi transport vesicle, Golgi apparatus, endoplasmic reticulum localization	YNL044W	YIP3	Protein localized to COPII vesicles; proposed to be involved in ER to Golgi transport; interacts with members of the Rab GTPase family and Yip1p; also interacts with Rtn1p
	CAGL0I01232g	-4.71995896200267		Ortholog(s) have endoplasmic reticulum localization	C1_10940C	ERP5	Protein involved in ER to Golgi transport; rat catheter and Spider biofilm repressed	YHR110W	ERP5	Protein with similarity to Emp24p and Erv25p; member of the p24 family involved in ER to Golgi transport
	CAGL0K12848g	-4.65153097249133	SEC53	Putative phosphomannomutase; protein differentially expressed in azole resistant strain	C1_02480W	PMM1	Phosphomannomutase; enzyme of O- and N-linked mannosylation; interconverts mannose-6-phosphate and mannose-l-phosphate; functional homolog of S. cerevisiae Sec53; antigenic in mice; Hap43-induced; flow model and Spider biofilm repressed	YFL045C	SEC53	Phosphomannomutase; involved in synthesis of GDP-mannose and dolichol-phosphate-mannose; required for folding and glycosylation of secretory proteins in the ER lumen
	CAGL0M12903g	-4.42316440282374	SEC28	Putative epsilon-COP coatomer subunit	C5_00080C		Epsilon-COP subunit of the coatomer; regulates retrograde Golgi-to-ER protein traffic; Spider biofilm repressed	YIL076W	SEC28	Epsilon-COP subunit of the coatomer; regulates retrograde Golgi-to-ER protein traffic; stabilizes Cop1p, the alpha-COP and the coatomer complex; non-essential for cell growth; protein abundance increases in response to DNA replication stress
	CAGL0C02761g	-4.36519963715882		Ortholog(s) have role in ER to Golgi vesicle-mediated transport, protein retention in ER lumen and ER to Golgi transport vesicle, Golgi apparatus, endoplasmic reticulum localization				YAL007C	ERP2	Member of the p24 family involved in ER to Golgi transport; similar to Emp24p and Erv25p; role in misfolded protein quality control; forms a heterotrimeric complex with Erp1p, Emp24p, and Erv25p; localized to COPII-coated vesicles; ERP2 has a paralog, ERP4, that arose from the whole genome duplication
	CAGL0L13244g	-4.29399862798829		Ortholog(s) have glycoprotein binding activity, role in ER to Golgi vesicle-mediated transport and ER to Golgi transport vesicle, Golgi membrane, endoplasmic reticulum localization	CR_07180W	EMP46	Protein similar to S. cerevisiae Emp46, an integral membrane component of ER-derived COPII-coated vesicles; functions in ER to Golgi transport; induced by alpha pheromone in SpiderM medium	YLR080W	EMP46	Integral membrane component of ER-derived COPII-coated vesicles; functions in ER to Golgi transport; EMP46 has a paralog, EMP47, that arose from the whole genome duplication
	CAGL0D00924g	-4.26362745102177		Ortholog(s) have role in ER to Golgi vesicle-mediated transport, Golgi vesicle docking, SNARE complex assembly and ER to Golgi transport vesicle membrane, Golgi membrane localization	C4_05280W	USO1	Ortholog(s) have role in ER to Golgi vesicle-mediated transport, Golgi vesicle docking, SNARE complex assembly and ER to Golgi transport vesicle membrane, Golgi membrane localization	YDL058W	USO1	Essential protein involved in vesicle-mediated ER to Golgi transport; binds membranes and functions during vesicle docking to the Golgi; required for assembly of the ER-to-Golgi SNARE complex
	CAGL0L01551g	-4.20602960669004		Ortholog(s) have role in ascospore formation, cellular response to biotic stimulus, cellular response to chemical stimulus, cellular response to glucose starvation and cellular response to neutral pH, more	C6_01720C	SUR7	Protein required for normal cell wall, plasma membrane, cytoskeletal organization, endocytosis; localizes to eisosome subdomains of plasma membrane; four transmembrane motifs; mutant shows ectopic, chitin-rich cell wall; fluconazole-induced	YML052W	SUR7	Plasma membrane protein, component of eisosomes; long-lived protein that remains stable in eisosomes of mother cells while other eisosome proteins, Pil1p and Lsp1p, turn over; may function to anchor the eisosome in place; sporulation and plasma membrane sphingolipid content are altered in mutants; localizes to furrow-like invaginations (MCC patches)
	CAGL0H02255g	-3.95882942214638		Ortholog(s) have role in Golgi to plasma membrane transport and cell periphery, endoplasmic reticulum, fungal-type vacuole membrane localization	C1_09430W		Putative membrane protein; induced by alpha pheromone in SpiderM medium; Hap4-induced gene; Spider biofilm induced	YMR266W	RSN1	Membrane protein of unknown function; overexpression suppresses NaCl sensitivity of sro7 mutant cells by restoring sodium pump (Ena1p) localization to the plasma membrane
	CAGL0H00803g	-3.79593507932892		Ortholog(s) have COPI-coated vesicle, Golgi apparatus, nuclear periphery localization	C7_01950W		Ortholog(s) have COPI-coated vesicle, Golgi apparatus, nuclear periphery localization	YPL246C	RBD2	Possible rhomboid protease; has similarity to eukaryotic rhomboid proteases including Pcp1p
	CAGL0L06292g	-3.75611928063908		Ortholog(s) have role in vesicle-mediated transport and COPI-coated vesicle, integral component of Golgi membrane localization	C4_07240W		Ortholog(s) have role in vesicle-mediated transport and COPI-coated vesicle, integral component of Golgi membrane localization	YDR100W	TVP15	Integral membrane protein; localized to late Golgi vesicles along with the v-SNARE Tlg2p
	CAGL0G00682g	-3.70107821593251		Ortholog(s) have role in ER to Golgi vesicle-mediated transport, protein retention in ER lumen and ER to Golgi transport vesicle, Golgi apparatus, endoplasmic reticulum, mitochondrion localization				YAR002C-A	ERP1	Member of the p24 family involved in ER to Golgi transport; role in misfolded protein quality control; forms heterotrimeric complex with Erp2p, Emp24p, and Erv25p; localized to COPII-coated vesicles; ERP1 has a paralog, ERP6, that arose from the whole genome duplication
	CAGL0I08569g	-3.45804660301215		Ortholog(s) have protein transporter activity and role in CVT pathway, ER to Golgi vesicle-mediated transport, macroautophagy, pexophagy, retrograde transport, vesicle recycling within Golgi	C1_07270W	SEC34	Ortholog(s) have protein transporter activity and role in CVT pathway, ER to Golgi vesicle-mediated transport, macroautophagy, pexophagy, retrograde transport, vesicle recycling within Golgi	YER157W	COG3	Essential component of the conserved oligomeric Golgi complex; a cytosolic tethering complex (Cog1p through Cog8p) that functions in protein trafficking to mediate fusion of transport vesicles to Golgi compartments
	CAGL0F00583g	-3.43472119762838		Ortholog(s) have role in ER to Golgi vesicle-mediated transport, protein secretion and COPII vesicle coat, Golgi membrane, cell division site, cell tip, cis-Golgi network, cytosol, nucleus localization	C1_03690W		Ortholog(s) have role in ER to Golgi vesicle-mediated transport, protein secretion and COPII vesicle coat, Golgi membrane, cell division site, cell tip, cis-Golgi network, cytosol, nucleus localization	YDR517W	GRH1	Acetylated cis-Golgi protein, involved in ER to Golgi transport; homolog of human GRASP65; forms a complex with the coiled-coil protein Bug1p; mutants are compromised for the fusion of ER-derived vesicles with Golgi membranes; protein abundance increases in response to DNA replication stress
	CAGL0H04741g	-3.43409258949789		Ortholog(s) have role in ER to Golgi vesicle-mediated transport and ER to Golgi transport vesicle, endoplasmic reticulum, fungal-type vacuole, plasma membrane localization	C3_06250W	ERV25	Component of COPII-coated vesicles; transcript induced upon filamentous growth; rat catheter biofilm repressed	YML012W	ERV25	Member of the p24 family involved in ER to Golgi transport; role in misfolded protein quality control; forms a heterotrimeric complex with Erp1, Erp2p, and Emp24,
	CAGL0I09746g	-3.36974562008916		Ortholog(s) have phosphoenolpyruvate transmembrane transporter activity, role in ER to Golgi vesicle-mediated transport, phosphoenolpyruvate transmembrane import into Golgi lumen and Golgi apparatus, endoplasmic reticulum localization	C6_00590W	SLY41	Protein involved in ER-to-Golgi transport; rat catheter and Spider biofilm induced	YOR307C	SLY41	Protein involved in ER-to-Golgi transport
	CAGL0G01760g	-3.30509918984369		Ortholog(s) have role in CVT pathway, establishment of cell polarity, filamentous growth of a population of unicellular organisms, macroautophagy, pexophagy, retrograde transport, vesicle recycling within Golgi	C2_05680W	COG4	Ortholog(s) have role in CVT pathway, establishment of cell polarity, filamentous growth of a population of unicellular organisms, macroautophagy, pexophagy, retrograde transport, vesicle recycling within Golgi	YPR105C	COG4	Essential component of the conserved oligomeric Golgi complex; a cytosolic tethering complex (Cog1p through Cog8p) that functions in protein trafficking to mediate fusion of transport vesicles to Golgi compartments
	CAGL0M12749g	-3.15266807879932		Putative shared subunit of Cop9 signalosome and eIF3; gene is upregulated in azole-resistant strain				YIL071C	PCI8	Possible shared subunit of Cop9 signalosome (CSN) and eIF3; binds eIF3b subunit Prt1p, has possible dual functions in transcriptional and translational control, contains a PCI (Proteasome-COP9 signalosome (CSN)-eIF3) domain
	CAGL0M03531g	-3.15161982094447		Ortholog(s) have role in ER to Golgi vesicle-mediated transport, retrograde vesicle-mediated transport, Golgi to ER and COPI vesicle coat, cytosol, endosome localization	C1_04830W	SEC21	Ortholog(s) have role in ER to Golgi vesicle-mediated transport, retrograde vesicle-mediated transport, Golgi to ER and COPI vesicle coat, cytosol, endosome localization	YNL287W	SEC21	Gamma subunit of coatomer; coatomer is a heptameric protein complex that together with Arf1p forms the COPI coat; involved in ER to Golgi transport of selective cargo
	CAGL0J03564g	-3.12777737395028		Ortholog(s) have GTPase activator activity, role in positive regulation of GTPase activity, regulation of COPII vesicle coating and integral component of endoplasmic reticulum membrane localization	C6_01760W	SEC12	Putative guanyl-nucleotide exchange factor; induced in high iron; Hap43-repressed	YCR067C	SED4	Integral ER membrane protein that stimulates Sar1p GTPase activity; involved in COPII vesicle budding through disassociation of coat proteins from membranes onto liposomes; binds Sec16p; SED4 has a paralog, SEC12, that arose from the whole genome duplication
	CAGL0E03872g	-3.06802593287082		Ortholog(s) have SNAP receptor activity, role in Golgi vesicle transport, vesicle fusion and Golgi medial cisterna, SNARE complex localization	C7_01740C		Ortholog(s) have SNAP receptor activity, role in Golgi vesicle transport, vesicle fusion and Golgi medial cisterna, SNARE complex localization	YHL031C	GOS1	v-SNARE protein involved in Golgi transport; homolog of the mammalian protein GOS-28/GS28
	CAGL0I08833g	-3.01045465161314		Ortholog(s) have role in clathrin-dependent endocytosis, exocytosis, positive regulation of endocytosis, protein trimerization and endosome, trans-Golgi network localization	C4_01980C	CLC1	Clathrin light chain; subunit of the major coat protein involved in intracellular protein transport and endocytosis; rat cathetr and Spider biofilm repressed	YGR167W	CLC1	Clathrin light chain; subunit of the major coat protein involved in intracellular protein transport and endocytosis; regulates endocytic progression; thought to regulate clathrin function; the clathrin triskelion is a trimeric molecule composed of three heavy chains that radiate from a vertex and three light chains which bind noncovalently near the vertex of the triskelion
	CAGL0H03927g	-2.9817243492213		Ortholog(s) have ubiquitin binding activity	C1_10760W	VPS23	ESCRT I protein sorting complex protein; involved in proteolytic activation of Rim101, which regulates pH response; ortholog of S. cerevisiae Stp22/Vps23	YCL008C	STP22	Component of the ESCRT-I complex; ESCRT-I is involved in ubiquitin-dependent sorting of proteins into the endosome; prevents polyubiquitination of the arrestin-related protein Rim8p, thereby directing its monoubiquitination by Rsp5p; homologous to the mouse and human Tsg101 tumor susceptibility gene; mutants exhibit a Class E Vps phenotype;
	CAGL0I04268g	-2.90482388553823		Ortholog(s) have Rab GTPase binding activity and Golgi apparatus localization	C1_12920C		Ortholog(s) have Rab GTPase binding activity and Golgi apparatus, endoplasmic reticulum localization	YGL161C	YIP5	Protein that interacts with Rab GTPases; localized to late Golgi vesicles; computational analysis of large-scale protein-protein interaction data suggests a possible role in vesicle-mediated transport
	CAGL0K03025g	-2.80693350182072		Ortholog(s) have role in vesicle-mediated transport and clathrin-coated vesicle, integral component of Golgi membrane localization	C1_09800C	TVP18	Putative integral membrane protein; fluconazole-induced	YMR071C	TVP18	Integral membrane protein; localized to late Golgi vesicles along with the v-SNARE Tlg2p; may interact with ribosomes, based on co-purification experiments; may have a role in intracellular sterol transport
	CAGL0I03718g	-2.761798558115		Ortholog(s) have ubiquitin binding activity, role in ER to Golgi vesicle-mediated transport, hyphal growth, nuclear division, retrograde vesicle-mediated transport, Golgi to ER and COPI vesicle coat, hyphal tip localization	C3_01720C		Alpha subunit of COPI vesicle coatomer complex; role in ER to Golgi vesicle-mediated transport, retrograde vesicle-mediated transport, Golgi to ER transport; flow model biofilm repressed	YDL145C	COP1	Alpha subunit of COPI vesicle coatomer complex; complex surrounds transport vesicles in the early secretory pathway
	CAGL0K11088g	-2.73618618919167		Ortholog(s) have role in ER to Golgi vesicle-mediated transport and COPI vesicle coat, cytosol, plasma membrane localization	CR_04380C	SEC26	Secretory vesicles coatomer complex protein	YDR238C	SEC26	Essential beta-coat protein of the COPI coatomer; involved in ER-to-Golgi protein trafficking and maintenance of normal ER morphology; shares 43% sequence identity with mammalian beta-coat protein (beta-COP)
	CAGL0L07282g	-2.69574177371933		Ortholog(s) have role in ER to Golgi vesicle-mediated transport, protein secretion and cis-Golgi network, cytoplasm localization	C2_02260W		Putative cis-golgi localized protein involved in ER to Golgi transport; Spider biofilm repressed	YDL099W	BUG1	Cis-golgi localized protein involved in ER to Golgi transport; forms a complex with the mammalian GRASP65 homolog, Grh1p; mutants are compromised for the fusion of ER-derived vesicles with Golgi membranes
	CAGL0M08052g	-2.69337134132699	GEA2	Ortholog(s) have ARF guanyl-nucleotide exchange factor activity				YJR031C	GEA1	Guanine nucleotide exchange factor for ADP ribosylation factors (ARFs); involved in vesicular transport between the Golgi and ER, Golgi organization, and actin cytoskeleton organization; GEA1 has a paralog, GEA2, that arose from the whole genome duplication
	CAGL0H04301g	-2.67413049564627		Ortholog(s) have peptidyl-prolyl cis-trans isomerase activity, role in apoptotic process, protein folding and biofilm matrix, mitochondrion localization	C2_02320C	CPR3	Putative peptidyl-prolyl cis-trans isomerase; macrophage-induced protein; protein levels decrease in stationary phase yeast cultures; predicted mitochondrial localization; overlaps orf19.1551	YML078W	CPR3	Mitochondrial peptidyl-prolyl cis-trans isomerase (cyclophilin); catalyzes the cis-trans isomerization of peptide bonds N-terminal to proline residues; involved in protein refolding after import into mitochondria
	CAGL0K03223g	-2.66644541827818		Ortholog(s) have role in Golgi to vacuole transport and AP-1 adaptor complex, nucleus localization	C2_00490W		Ortholog(s) have role in Golgi to vacuole transport and AP-1 adaptor complex, nucleus localization	YHL019C	APM2	Protein of unknown function; homologous to the medium chain of mammalian clathrin-associated protein complex; involved in vesicular transport
	CAGL0I08701g	-2.64794541805136		Ortholog(s) have role in ER to Golgi vesicle-mediated transport, cellular response to drug, vesicle fusion with Golgi apparatus	C5_04660C	TIP1	Protein with a predicted role in biogenesis of ER-derived COPII transport vesicles; mutation confers hypersensitivity to toxic ergosterol analog	YGR172C	YIP1	Integral membrane protein; required for the biogenesis of ER-derived COPII transport vesicles; interacts with Yif1p and Yos1p; localizes to the Golgi, the ER, and COPII vesicles; human homolog YIPF5 can complement yeast yip1 mutant
	CAGL0I08855g	-2.60444279079411		Ortholog(s) have Rab guanyl-nucleotide exchange factor activity, role in intra-Golgi vesicle-mediated transport, protein complex assembly and TRAPPII protein complex, trans-Golgi network localization	C1_05320C		Ortholog(s) have Rab guanyl-nucleotide exchange factor activity, role in intra-Golgi vesicle-mediated transport, protein complex assembly and TRAPPII protein complex, trans-Golgi network localization	YGR166W	TRS65	Component of transport protein particle (TRAPP) complex II; TRAPPII is a multimeric guanine nucleotide-exchange factor for the GTPase Ypt1p, regulating intra-Golgi and endosome-Golgi traffic; role in cell wall beta-glucan biosynthesis and the stress response
	CAGL0F03949g	-2.5994218204048		Ortholog(s) have Rab guanyl-nucleotide exchange factor activity and role in CVT pathway, early endosome to Golgi transport, intra-Golgi vesicle-mediated transport, macroautophagy, regulation of GTPase activity	C4_05790W		Ortholog(s) have Rab guanyl-nucleotide exchange factor activity and role in CVT pathway, early endosome to Golgi transport, intra-Golgi vesicle-mediated transport, macroautophagy, regulation of GTPase activity	YMR218C	TRS130	Component of transport protein particle (TRAPP) complex II; TRAPPII is a multimeric guanine nucleotide-exchange factor for the GTPase Ypt1p, regulating intra-Golgi and endosome-Golgi traffic
	CAGL0G01496g	-2.55669033585724	COG6	Ortholog(s) have role in CVT pathway, intra-Golgi vesicle-mediated transport and Golgi transport complex localization	C2_05850C		Ortholog(s) have role in CVT pathway, intra-Golgi vesicle-mediated transport and Golgi transport complex, cell division site, cytosol, nucleus localization	YNL041C	COG6	Component of the conserved oligomeric Golgi complex; a cytosolic tethering complex (Cog1p through Cog8p) that functions in protein trafficking to mediate fusion of transport vesicles to Golgi compartments
	CAGL0M07139g	-2.49914894292261		Ortholog(s) have role in endoplasmic reticulum tubular network organization, response to endoplasmic reticulum stress and endoplasmic reticulum tubular network localization				YHR192W	LNP1	Lunapark family member involved in ER network formation; regulates the ER asymmetry-induced inheritance block during ER stress; localizes to ER junctions and this localization is regulated by the yeast atlastin ortholog Sey1p; interacts with the reticulon protein Rtn1p; induced in response to the DNA-damaging agent MMS
	CAGL0L12694g	-2.41475627892106		Ortholog(s) have phosphatidylinositol binding activity	C1_04540C	VPS16	Protein similar to S. cerevisiae Vps16p, which is involved in protein-vacuolar targeting; likely to be essential for growth, based on insertional mutagenesis; downregulated in biofilm or in azole-resistant strain that overexpresses MDR1	YPL045W	VPS16	Subunit of the HOPS and the CORVET complexes; part of the Class C Vps complex essential for membrane docking and fusion at Golgi-to-endosome and endosome-to-vacuole protein transport stages
	CAGL0D01078g	-2.41419391690595		Ortholog(s) have role in cargo loading into COPII-coated vesicle and COPII vesicle coat, cytosol, endoplasmic reticulum exit site localization				YNL049C	SFB2	Component of the Sec23p-Sfb2p heterodimer of the COPII vesicle coat; required for cargo selection during vesicle formation in ER to Golgi transport; homologous to Sfb3p; SFB2 has a paralog, SEC24, that arose from the whole genome duplication
	CAGL0M11946g	-2.39253140881382		Ortholog(s) have role in ER to Golgi vesicle-mediated transport and ER to Golgi transport vesicle, integral component of Golgi membrane, integral component of endoplasmic reticulum membrane localization	C5_00830C	ERV46	Putative ER-derived vesicle protein; COPII-coated vesicle complex subunit; transcript induced by filamentous growth; Spider biofilm repressed	YAL042W	ERV46	Protein localized to COPII-coated vesicles; forms a complex with Erv41p; involved in the membrane fusion stage of transport
	CAGL0J08998g	-2.38988871339887		Ortholog(s) have structural molecule activity, role in COPII-coated vesicle budding, intracellular protein transport, nuclear envelope organization and COPII vesicle coat, cytosol, mating projection tip localization	C1_06930W	PGA63	Component COPII vesicle coat; required for vesicle formation in ER to Golgi transport; predicted GPI-anchor; flow model and Spider biofilm repressed	YDL195W	SEC31	Component of the Sec13p-Sec31p complex of the COPII vesicle coat; COPII coat is required for vesicle formation in ER to Golgi transport; mutant has increased aneuploidy tolerance
	CAGL0C05203g	-2.37473988036963		Ortholog(s) have AP-2 adaptor complex, cytosol localization	C2_07880W	APM4	Cargo-binding subunit of the clathrin associated protein complex (AP-2), involved in endocytosis	YOL062C	APM4	Cargo-binding mu subunit of AP-2; AP-2 is a heterotetrameric endocytic cargo-binding adaptor that facilitates uptake of membrane proteins during clathrin-mediated endocytosis; Apm4p is required for AP-2 function and localization, and binds cell wall stress receptor Mid2p; AP-2 is required for cell polarity responses to pheromone, nutritional status and cell wall damage in S. cerevisiae, and for h…
	CAGL0E00847g	-2.31820449905788		Ortholog(s) have ARF guanyl-nucleotide exchange factor activity and role in ER to Golgi vesicle-mediated transport, autophagosome assembly, cellular response to drug, hyphal growth, intra-Golgi vesicle-mediated transport	C3_04820C	SEC7	Putative guanine nucleotide exchange factor (GEF); mutation confers hypersensitivity to Brefeldin A; caspofungin repressed	YDR170C	SEC7	Guanine nucleotide exchange factor (GEF) for ADP ribosylation factors; involved in proliferation of the Golgi, intra-Golgi transport and ER-to-Golgi transport; found in the cytoplasm and on Golgi-associated coated vesicles
	CAGL0H08932g	-2.30718032040485		Ortholog(s) have ubiquitin binding activity	C6_02260C	SEC27	Ortholog(s) have ubiquitin binding activity	YGL137W	SEC27	Essential beta'-coat protein of the COPI coatomer; involved in ER-to-Golgi and Golgi-to-ER transport; contains WD40 domains that mediate cargo selective interactions; 45% sequence identity to mammalian beta'-COP
	CAGL0I00704g	-2.30474525459225		Ortholog(s) have dolichyl-diphosphooligosaccharide-protein glycotransferase activity, role in protein N-linked glycosylation and oligosaccharyltransferase complex localization	C1_03600W		OPutative dolichyl-diphosphooligosaccharide-protein glycotransferase; role in protein N-linked glycosylation; Spider biofilm repressed	YMR149W	SWP1	Delta subunit of the oligosaccharyl transferase glycoprotein complex; complex is required for N-linked glycosylation of proteins in the endoplasmic reticulum
	CAGL0L12826g	-2.28952422223087		Ortholog(s) have GTPase activity and role in Golgi to plasma membrane protein transport, protein targeting to Golgi, response to endoplasmic reticulum stress	C1_11190W	ARL3	Putative Ras superfamily GTPase; induced by nitric oxide independent of Yhb1p	YPL051W	ARL3	ARF-like small GTPase of the RAS superfamily; required for recruitment of Arl1p, a GTPase that regulates membrane traffic, to the Golgi apparatus; NatC-catalyzed N-terminal acetylation regulates Golgi membrane association mediated by interaction with membrane receptor, Sys1p; similar to ADP-ribosylation factor and orthologous to mammalian ARFRP1
	CAGL0A01848g	-2.28526585844627		Ortholog(s) have role in cargo loading into COPII-coated vesicle and COPII vesicle coat, cell periphery, cytosol, endoplasmic reticulum, mating projection tip localization	C2_03410W		Ortholog(s) have role in cargo loading into COPII-coated vesicle and COPII vesicle coat, cell periphery, cytosol, endoplasmic reticulum, mating projection tip localization	YHR098C	SFB3	Component of the Sec23p-Sfb3p heterodimer of the COPII vesicle coat; COPII coat is required for cargo selection during vesicle formation in ER to Golgi transport; scaffolding function of Lst1p required to generate vesicles that can accommodate difficult cargo proteins that include large oligomeric assemblies and asymmetrically distributed membrane proteins; homologous to Sec24p and Sfb2p
	CAGL0M03707g	-2.25314555995543		Ortholog(s) have guanyl-nucleotide exchange factor activity and role in Golgi to endosome transport, endocytosis, protein targeting to vacuole	C1_13120C	MON2	Peripheral membrane protein; role in endocytosis and vacuole integrity; flow model and rat catheter biofilm repressed	YNL297C	MON2	Protein with a role in endocytosis and vacuole integrity; peripheral membrane protein; interacts with and negatively regulates Arl1p; localizes to the endosome; member of the Sec7p family of proteins
	CAGL0K01001g	-2.20741587751387		Ortholog(s) have role in establishment of protein localization to plasma membrane, protein targeting to vacuole, receptor-mediated endocytosis, response to pheromone	C4_00780C		Ortholog(s) have role in establishment of protein localization to plasma membrane, protein targeting to vacuole, receptor-mediated endocytosis, response to pheromone	YGR198W	YPP1	Cargo-transport protein involved in endocytosis; interacts with phosphatidylinositol-4-kinase Stt4p; is required, along with Efr3p, for the assembly and recruitment of multiple copies of the kinase into phosphoinositide kinase (PIK) patches at the plasma membrane; positively regulates Stt4p; GFP-fusion protein localizes to the cytoplasm; YGR198W is an essential gene
	CAGL0L02145g	-2.17701286185776		Ortholog(s) have role in Golgi to vacuole transport, protein targeting to vacuole and AP-3 adaptor complex localization	C6_00430C		Phosphorylated protein of unknown function; transcript is upregulated clinical isolates from HIV positive patients with oral candidiasis	YBR288C	APM3	Mu3-like subunit of the clathrin associated protein complex (AP-3); functions in transport of alkaline phosphatase to the vacuole via the alternate pathway
	CAGL0J11044g	-2.15995080637472		Ortholog(s) have endoplasmic reticulum, plasma membrane localization	CR_09770C	PMT5	Protein mannosyltransferase (PMT), expressed at extremely low levels; not required for wild-type hyphal growth, drug resistance, or virulence in mouse systemic infection; one of five PMT family members	YDR307W	PMT7	Putative protein mannosyltransferase similar to Pmt1p; has a potential role in protein O-glycosylation
	CAGL0L01683g	-2.14721886106897		Ortholog(s) have role in endosome organization, regulation of protein localization and BLOC-1 complex, endosome localization				YKL061W	BLI1	Subunit of the BLOC-1 complex involved in endosomal maturation; interacts with Msb3p; green fluorescent protein (GFP)-fusion protein localizes to the endosome
	CAGL0I00616g	-2.14462798623402		Ortholog(s) have protein transporter activity, role in posttranslational protein targeting to membrane, translocation and Sec62/Sec63 complex localization	C4_00630C	SEC72	ER protein-translocation complex component; regulated by Gcn4p; repressed in response to amino acid starvation (3-aminotriazole treatment); sumoylation target	YLR292C	SEC72	Non-essential subunit of Sec63 complex; with Sec61 complex, Kar2p/BiP and Lhs1p forms a channel competent for SRP-dependent and post-translational SRP-independent protein targeting and import into the ER; other members are Sec63p, Sec62p, and Sec66p
	CAGL0I02156g	-2.13044894535235		Ortholog(s) have role in endocytosis and cellular bud neck, prospore membrane localization	C4_00590C		Protein with a predicted role in clathrin cage assembly; Hap43-repressed; Spider biofilm repressed	YHR161C	YAP1801	Protein of the AP180 family, involved in clathrin cage assembly; binds Pan1p and clathrin; YAP1801 has a paralog, YAP1802, that arose from the whole genome duplication
	CAGL0E05896g	-2.10099240333345		Ortholog(s) have GTP binding, GTPase activity	C6_02220W	SAR1	Functional homolog of S. cerevisiae Sar1; which is required for ER-to-Golgi protein transport; binds GTP; similar to small GTPase superfamily proteins; gene has intron; Hap43-induced; rat catheter biofilm repressed	YPL218W	SAR1	ARF family GTPase; component of the COPII vesicle coat; required for transport vesicle formation during ER to Golgi protein transport; lowers membrane rigidity aiding vesicle formation; localizes to ER-mitochondrial contact sites where it enhances membrane curvature, thereby reducing contact size via its N-terminal amphipathic helix; regulates mitochondrial fission and fusion dynamics
	CAGL0D00572g	-2.09352471426615		Ortholog(s) have Rab GTPase binding, Ras guanyl-nucleotide exchange factor activity, phosphatidylinositol binding activity	C2_02440W		Ortholog(s) have Rab GTPase binding, Ras guanyl-nucleotide exchange factor activity, phosphatidylinositol binding activity	YDL077C	VAM6	Guanine nucleotide exchange factor for the GTPase Gtr1p; subunit of the HOPS endocytic tethering complex; vacuole membrane protein; functions as a Rab GTPase effector, interacting with both GTP- and GDP-bound conformations of Ypt7p; facilitates tethering and promotes membrane fusion events at the late endosome and vacuole; required for both membrane and protein trafficking; component of vacuole-m…
	CAGL0F01595g	-2.08818129285934		Ortholog(s) have peptidase activity, role in protein targeting to ER, signal peptide processing and signal peptidase complex localization	C1_13020C	SPC3	Essential protein; similar to S. cerevisiae Spc3p, a component of the signal peptidase complex required for signal peptidase activity; predicted integral ER membrane protein; complements spc3 and suppresses sec61 S. cerevisiae mutants	YLR066W	SPC3	Subunit of signal peptidase complex; complex catalyzes cleavage of N-terminal signal sequences of proteins targeted to the secretory pathway; homologous to mammalian SPC22/23; other members of the complex are Spc1p, Spc2p, and Sec11p
	CAGL0B01551g	-2.08444721535416		Ortholog(s) have role in Golgi to endosome transport, cell morphogenesis, cleistothecium development, conidium formation and endoplasmic reticulum organization, more	C5_02050W		Ortholog(s) have role in Golgi to endosome transport, cell morphogenesis, cleistothecium development, conidium formation and endoplasmic reticulum organization, more	YDR141C	DOP1	Golgi-localized, leucine-zipper domain containing protein; involved in endosome to Golgi transport, organization of the ER, establishing cell polarity, and morphogenesis; detected in highly purified mitochondria in high-throughput studies
	CAGL0K11792g	-2.0732726519787		Ortholog(s) have role in Golgi to vacuole transport, ascospore wall assembly, cellular sphingolipid homeostasis, retrograde transport, endosome to Golgi and GARP complex, mitochondrion localization	C2_01170C		Ortholog(s) have role in Golgi to vacuole transport, ascospore wall assembly, cellular sphingolipid homeostasis, retrograde transport, endosome to Golgi and GARP complex, mitochondrion localization	YDR027C	VPS54	Component of the GARP (Golgi-associated retrograde protein) complex; GARP is required for the recycling of proteins from endosomes to the late Golgi, and for mitosis after DNA damage induced checkpoint arrest; potentially phosphorylated by Cdc28p; members of the GARP complex are Vps51p-Vps52p-Vps53p-Vps54p
	CAGL0B00814g	-2.07084765125536		Ortholog(s) have role in actin cortical patch localization, actin filament organization, endocytosis and actin cortical patch, cytosol, mitotic spindle pole body localization	C2_09710C		Ortholog of S. cerevisiae/S. pombe Lsb5; predicted role in actin cortical patch localization, actin filament organization, endocytosis; flow model biofilm induced; Spider biofilm repressed	YCL034W	LSB5	Protein involved in membrane-trafficking events at plasma membrane; interacts with actin regulators Sla1p and Las17p, ubiquitin, Arf3p to couple actin dynamics to membrane trafficking processes; similar structure to GGA family of proteins with N-terminal VHS domain and GAT domain; binds Las17p, which is homolog of human Wiskott-Aldrich Syndrome protein involved in actin patch assembly, actin poly…
	CAGL0K05225g	-2.04702094045232		Ortholog(s) have clathrin binding activity, role in Golgi to vacuole transport and AP-1 adaptor complex localization	CR_02870W	APL4	Predicted gamma-adaptin, large subunit of the clathrin-associated protein (AP-1) complex; that binds clathrin and is involved in vesicle mediated transport; induced in core caspofungin response; rat catheter biofilm repressed	YPR029C	APL4	Gamma-adaptin; large subunit of the clathrin-associated protein (AP-1) complex; binds clathrin; involved in vesicle mediated transport
	CAGL0F02513g	-2.04043800175415		Ortholog(s) have role in protein secretion and cytosol localization	C5_01900C		Protein of unknown function; involved in secretion of proteins that lack classical secretory signal sequences; Spider biofilm induced	YJL205C	NCE101	Protein of unknown function; involved in secretion of proteins that lack classical secretory signal sequences; SWAT-GFP and mCherry fusion proteins localize to the cytosol
	CAGL0I02772g	-2.02064543012583		Ortholog(s) have role in ER to Golgi vesicle-mediated transport, cellular protein complex localization, positive regulation of macroautophagy, protein complex assembly, protein localization to pre-autophagosomal structure	C7_02180C	TRS33	Putative TRAPP complex subunit; constitutive expression independent of MTL or white-opaque status	YOR115C	TRS33	Core component of TRAPP complexes I, II and IV; transport protein particle (TRAPP) complexes are related multimeric guanine nucleotide-exchange factor for the GTPase Ypt1p, regulating ER-Golgi traffic (TRAPPI), intra-Golgi traffic (TRAPPII), endosome-Golgi traffic (TRAPPII and III) and autophagy (TRAPPIII, and IV); proposed subunit of a novel complex, TRAPPIV, that may function redundantly with T…
	CAGL0G06424g	-2.00754796442269		Ortholog(s) have phosphatidylinositol-3-phosphate binding activity, role in late endosome to Golgi transport, protein localization and cytosol, endosome, fungal-type vacuole membrane, nucleus localization	C1_08340C		Sorting nexin; role in maintaining late-Golgi resident enzymes in their proper location by recycling molecules from the prevacuolar compartment; Spider biofilm induced	YOR357C	SNX3	Sorting nexin for late-Golgi enzymes; required to maintain late-Golgi resident enzymes in their proper location by recycling molecules from the prevacuolar compartment; contains a PX domain and sequence similarity to human Snx3p
	CAGL0K00649g	-1.98058489503353		Ortholog(s) have role in ER to Golgi vesicle-mediated transport and endoplasmic reticulum, integral component of membrane localization				YJL192C	SOP4	ER-membrane protein; subunit of evolutionarily conserved EMC (Endoplasmic Reticulum Membrane Complex) implicated in ERAD (ER-associated degradation) and proper assembly of multi-pass transmembrane (TM) proteins; EMC acts in yeast as an ER-mitochondria tether that interacts with outer membrane protein Tom5 of TOM (Translocase of the Mitochondrial Outer Membrane) complex; suppressor of pma1-7, dele…
	CAGL0L13200g	-1.97670395903011		Ortholog(s) have SNAP receptor activity and role in ER to Golgi vesicle-mediated transport, vesicle fusion with Golgi apparatus	C1_02510W		Putative v-SNARE of the endoplasmic reticulum membrane; possibly an essential gene, disruptants not obtained by UAU1 method	YLR078C	BOS1	v-SNARE (vesicle specific SNAP receptor); localized to the endoplasmic reticulum membrane and necessary for vesicular transport from the ER to the Golgi; required for efficient nuclear fusion during mating
	CAGL0J08778g	-1.96570390191355		Ortholog(s) have structural molecule activity	C3_03170W	SEC13	Putative protein transport factor; antigenic during murine systemic infection; macrophage-downregulated protein; protein level decreases in stationary phase cultures; Spider biofilm repressed	YLR208W	SEC13	Structural component of 3 complexes; subunit of the Nup84p nuclear pore subcomplex that contributes to nucleocytoplasmic transport and NPC biogenesis; subunit of the COPII vesicle coat required for ER-to-Golgi transport; subunit of SEACAT, a subcomplex of the coatomer-related, vacuolar-associated SEA complex, that inhibits the TORC1 inhibitory role of SEACIT (Iml1p-Npr2p-Npr3p), a GAP for Gtr1p, …
	CAGL0M01782g	-1.95519196060895		Ortholog(s) have ATPase activity, SNARE binding, phosphatidic acid binding activity	C1_13580W	SEC18	Functional homolog of S. cerevisiae Sec18p, which acts in protein transport; conserved ATP binding site; not glycosylated	YBR080C	SEC18	AAA ATPase and SNARE disassembly chaperone; required for vesicular transport between ER and Golgi, the 'priming' step in homotypic vacuole fusion, autophagy, and protein secretion; releases Sec17p from SNAP complexes; has similarity to mammalian N-ethylmaleimide-sensitive factor (NSF)
	CAGL0K12166g	-1.95387246307347		Ortholog(s) have role in Golgi to plasma membrane transport, exocyst assembly, exocyst localization, spliceosomal complex assembly	C6_01280W	EXO84	Predicted subunit of the exocyst complex, involved in exocytosis; localizes to a crescent on the surface of the hyphal tip	YBR102C	EXO84	Exocyst subunit with dual roles in exocytosis and spliceosome assembly; subunit of the the exocyst complex which mediates polarized targeting and tethering of post-Golgi secretory vesicles to active sites of exocytosis at the plasma membrane (PM) prior to SNARE-mediated fusion; required for exocyst assembly and targeting the complex to specific sites on the bud tip PM; associates the U1 snRNP; ro…
	CAGL0D02068g	-1.95244854826532		Ortholog(s) have clathrin binding activity, role in Golgi to vacuole transport, cellular response to drug and AP-1 adaptor complex, cytosol localization	C3_02430W	APL2	Phosphorylated protein of unknown function; mutation confers hypersensitivity to toxic ergosterol analog	YKL135C	APL2	Beta-adaptin subunit of the clathrin-associated protein (AP-1) complex; binds clathrin; involved in clathrin-dependent Golgi protein sorting; protein abundance increases in response to DNA replication stress
	CAGL0L04884g	-1.94716196478341		Ortholog(s) have role in CVT pathway, ER to Golgi vesicle-mediated transport, macroautophagy, pexophagy, retrograde transport, vesicle recycling within Golgi	CR_02630C		Essential component of the conserved oligomeric Golgi complex; role in fusion of transport vesicles to Golgi compartments; rat catheter biofilm repressed	YGR120C	COG2	Essential component of the conserved oligomeric Golgi complex; a cytosolic tethering complex that functions in protein trafficking to mediate fusion of transport vesicles to Golgi compartments; the components of the Golgi complex are Gog1p through Cog8p
	CAGL0E05258g	-1.94478695379416		Ortholog(s) have SNAP receptor activity and role in Golgi to plasma membrane transport, endocytosis, exocytosis, vesicle fusion	C1_13690C		Ortholog(s) have SNAP receptor activity and role in Golgi to plasma membrane transport, endocytosis, exocytosis, vesicle fusion	YOR327C	SNC2	Vesicle membrane receptor protein (v-SNARE); involved in the fusion between Golgi-derived secretory vesicles with the plasma membrane; Snc2p levels regulated by Vps45p; member of the synaptobrevin/VAMP family of R-type v-SNARE proteins; SNC2 has a paralog, SNC1, that arose from the whole genome duplication
	CAGL0K08096g	-1.92265021335089		Ortholog(s) have ARF guanyl-nucleotide exchange factor activity and role in exocytosis, positive regulation of ARF protein signal transduction, protein targeting to Golgi, response to endoplasmic reticulum stress				YPR095C	SYT1	Guanine nucleotide exchange factor (GEF) for Arf proteins; promotes activation of Arl1p, which recruits Imh1p to the Golgi; involved in vesicular transport; member of the Sec7-domain family; contains a PH domain
	CAGL0J04312g	-1.90655181695889		Ortholog(s) have signal sequence binding activity, role in Golgi to endosome transport, Golgi to vacuole transport, protein targeting to vacuole and Golgi apparatus, fungal-type vacuole localization	C1_12490W	PEP1	Type I transmembrane sorting receptor for multiple vacuolar hydrolases; cycles between late-Golgi and prevacuolar endosome-like compartments; rat catheter biofilm repressed	YBL017C	PEP1	Type I transmembrane sorting receptor for multiple vacuolar hydrolases; cycles between the late-Golgi and prevacuolar endosome-like compartments
	CAGL0H00242g	-1.87308171865943		Has domain(s) with predicted zinc ion binding activity, role in ER to Golgi vesicle-mediated transport, intracellular protein transport and COPII vesicle coat localization
	CAGL0I09922g	-1.85228288246948		Ortholog(s) have acetylglucosaminyltransferase activity, role in protein N-linked glycosylation and Golgi medial cisterna localization	C2_05050C		Ortholog(s) have acetylglucosaminyltransferase activity, role in protein N-linked glycosylation and Golgi medial cisterna localization	YOR320C	GNT1	N-acetylglucosaminyltransferase; capable of modification of N-linked glycans in the Golgi apparatus
	CAGL0H03355g	-1.85017754996358		Ortholog(s) have role in endosome organization, regulation of protein localization and BLOC-1 complex, endosome localization	C3_02580C		Ortholog(s) have role in endosome organization, regulation of protein localization and BLOC-1 complex, endosome localization	YGL079W	KXD1	Subunit of the BLOC-1 complex involved in endosomal maturation; null mutant is sensitive to drug inducing secretion of vacuolar cargo; GFP-fusion protein localizes to the endosome
	CAGL0L08800g	-1.83206307620132		Ortholog(s) have role in retrograde vesicle-mediated transport, Golgi to ER and COPI vesicle coat, cytosol, nucleus localization	CR_03600C		Ortholog(s) have role in retrograde vesicle-mediated transport, Golgi to ER and COPI vesicle coat, cytosol, nucleus localization	YPL010W	RET3	Zeta subunit of the coatomer complex (COPI); COPI coats Golgi-derived transport vesicles; involved in retrograde transport between Golgi and ER
	CAGL0F06171g	-1.76830021186895	nup116	Ortholog(s) have nucleocytoplasmic transporter activity, structural constituent of nuclear pore activity	C3_06440W		Ortholog(s) have nucleocytoplasmic transporter activity, structural constituent of nuclear pore activity	YMR047C	NUP116	FG-nucleoporin component of central core of the nuclear pore complex; contributes directly to nucleocytoplasmic transport and maintenance of the nuclear pore complex (NPC) permeability barrier; forms a stable association with Nup82p, Gle2p and two other FG-nucleoporins (Nsp1p and Nup159p); NUP116 has a paralog, NUP100, that arose from the whole genome duplication
	CAGL0I07513g	-1.73802776815726		Ortholog(s) have lipid binding, protein serine/threonine kinase activity	C1_12410C	PKH2	Putative serine/threonine protein kinase; predicted role in sphingolipid-mediated signaling pathway that controls endocytosis; mRNA binds She3 and is localized to hyphal tips	YOL100W	PKH2	Serine/threonine protein kinase; involved in sphingolipid-mediated signaling pathway that controls endocytosis; activates Ypk1p and Ykr2p, components of signaling cascade required for maintenance of cell wall integrity; contains a PH-like domain; redundant with Pkh1p; PKH2 has a paralog, PKH1, that arose from the whole genome duplication
	CAGL0I06919g	-1.711350318108		Ortholog(s) have protein binding, bridging activity, role in CVT pathway, Golgi organization, retrograde transport, vesicle recycling within Golgi and Golgi transport complex localization				YGL223C	COG1	Essential component of the conserved oligomeric Golgi complex; a cytosolic tethering complex (Cog1p through Cog8p) that functions in protein trafficking to mediate fusion of transport vesicles to Golgi compartments
	CAGL0E01001g	-1.70864761618876		Ortholog(s) have SNARE binding activity and role in positive regulation of vesicle fusion, vesicle docking involved in exocytosis	C7_02320W	SEC1	Ortholog(s) have SNARE binding activity and role in positive regulation of vesicle fusion, vesicle docking involved in exocytosis	YDR164C	SEC1	Sm-like protein involved in docking and fusion of exocytic vesicles; binds to assembled SNARE complexes at the membrane and stimulates membrane fusion; localization to sites of secretion (bud neck and bud tip) is dependent on SNARE function; interacts directly with essential exocyst subunit Sec6p
	CAGL0K00539g	-1.70117766048646		Has domain(s) with predicted role in intracellular protein transport, vesicle-mediated transport and clathrin adaptor complex localization
	CAGL0A04741g	-1.69763171196056		Ortholog(s) have role in ER to Golgi vesicle-mediated transport, Golgi inheritance, Golgi localization, retrograde vesicle-mediated transport, Golgi to ER and COPI vesicle coat localization	C5_02300C	RET2	Delta subunit of the coatomer complex (COPI); coats Golgi-derived transport vesicles; involved in retrograde transport between Golgi and ER; interacts with Crk1 in the two-hybrid system; Spider biofilm repressed	YFR051C	RET2	Delta subunit of the coatomer complex (COPI); COPI coats Golgi-derived transport vesicles; involved in retrograde transport between Golgi and ER
	CAGL0D01760g	-1.6845629447542		Ortholog(s) have Rab GTPase binding activity and Golgi apparatus localization	C3_07350W		Ortholog(s) have Rab GTPase binding activity and Golgi apparatus, endoplasmic reticulum localization	YGL198W	YIP4	Protein that interacts with Rab GTPases; localized to late Golgi vesicles; computational analysis of large-scale protein-protein interaction data suggests a possible role in vesicle-mediated transport
	CAGL0C03179g	-1.68412586100604		Ortholog(s) have SNAP receptor activity and role in ER to Golgi vesicle-mediated transport, retrograde vesicle-mediated transport, Golgi to ER, vesicle fusion with Golgi apparatus	CR_03970C	SEC22	Ortholog(s) have SNAP receptor activity and role in ER to Golgi vesicle-mediated transport, retrograde vesicle-mediated transport, Golgi to ER, vesicle fusion with Golgi apparatus	YLR268W	SEC22	R-SNARE protein; assembles into SNARE complex with Bet1p, Bos1p and Sed5p; cycles between the ER and Golgi complex; involved in anterograde and retrograde transport between the ER and Golgi; synaptobrevin homolog
	CAGL0K08140g	-1.67129777496415		Ortholog(s) have Rab guanyl-nucleotide exchange factor activity and role in ER to Golgi vesicle-mediated transport, intra-Golgi vesicle-mediated transport	C2_02870W		Ortholog(s) have Rab guanyl-nucleotide exchange factor activity and role in ER to Golgi vesicle-mediated transport, intra-Golgi vesicle-mediated transport	YKR068C	BET3	Core component of transport protein particle (TRAPP) complexes I-III; TRAPP complexes are related multimeric guanine nucleotide-exchange factors for the GTPase Ypt1, regulating ER-Golgi traffic (TRAPPI), intra-Golgi traffic (TRAPPII), endosome-Golgi traffic (TRAPPII and III) and autophagy (TRAPPIII); hydrophilic homodimeric protein that acts in conjunction with SNARE proteins in targeting and fus…
	CAGL0F04389g	-1.66000635704738		Ortholog(s) have AP-2 adaptor complex, cellular bud neck localization	C1_07590C		Ortholog(s) have AP-2 adaptor complex, cellular bud neck localization	YBL037W	APL3	Alpha-adaptin; large subunit of the clathrin associated protein complex (AP-2); involved in vesicle mediated transport
	CAGL0E03454g	-1.65296040960026	IMH1	Protein with a role in vesicular transport; protein abundance increased in ace2 mutant cells
	CAGL0H01617g	-1.64974534390583		Ortholog(s) have GTPase activator activity, phospholipid binding activity, role in ER to Golgi vesicle-mediated transport, intra-Golgi vesicle-mediated transport and endosome, trans-Golgi network localization	C1_03480C	AGE1	Putative GTPase activator; induced in low iron; rat catheter biofilm repressed	YDR524C	AGE1	ADP-ribosylation factor (ARF) GTPase activating protein (GAP) effector; involved in the secretory and endocytic pathways; contains C2C2H2 cysteine/histidine motif
	CAGL0F02497g	-1.62959346023101		Ortholog(s) have SNARE binding activity, role in early endosome to Golgi transport, endocytic recycling, endocytosis and Golgi apparatus, cellular bud, endosome, site of polarized growth localization	C5_01720C	RCY1	Putative F-box protein involved in endocytic membrane traffic and/or recycling; fungal-specific (no human or murine homolog)	YJL204C	RCY1	F-box protein involved in recycling endocytosed proteins; involved in recycling plasma membrane proteins internalized by endocytosis; localized to sites of polarized growth; direct interaction with C-terminal cytoplasmic region of Drs2p plays an important role for Drs2p function in endocytic recycling pathway
	CAGL0G09911g	-1.60875974978069		Ortholog(s) have GTPase activator activity, role in macroautophagy, regulation of COPII vesicle coating and COPII vesicle coat, endoplasmic reticulum localization	C4_05690W	SEC23	Putative GTPase-activating protein; regulated upon yeast-hypha switch; Spider biofilm repressed	YPR181C	SEC23	GTPase-activating protein, stimulates the GTPase activity of Sar1p; component of the Sec23p-Sec24p heterodimer of the COPII vesicle coat, involved in ER to Golgi transport; substrate of Ubp3/Bre5 complex; ubiquitylated by Ub-ligase Rsp5p; proteasome-mediated degradation of Sec23p is regulated by Cdc48p
	CAGL0L03179g	-1.56462365371257		Ortholog(s) have role in late endosome to vacuole transport via multivesicular body sorting pathway, protein targeting to vacuole and late endosome localization	C5_02830W		Ortholog(s) have role in late endosome to vacuole transport via multivesicular body sorting pathway, protein targeting to vacuole and late endosome localization	YKR035W-A	DID2	Class E protein of the vacuolar protein-sorting (Vps) pathway; binds Vps4p and directs it to dissociate ESCRT-III complexes; forms a functional and physical complex with Ist1p; human ortholog may be altered in breast tumors
	CAGL0I06787g	-1.55093516833166		Ortholog(s) have SNARE binding, polyubiquitin binding activity, role in protein secretion, ubiquitin-dependent protein catabolic process, vesicle-mediated transport and plasma membrane localization	C1_14420W	DDI1	Putative DNA damage inducible v-SNARE binding protein; macrophage/pseudohyphal-repressed	YER143W	DDI1	DNA damage-inducible v-SNARE binding protein; role in suppression of protein secretion; may play a role in S-phase checkpoint control; has ubiquitin-associated (UBA), ubiquitin-like (UBL), and retroviral-like proteinase (RVP) domains
	CAGL0M13563g	-1.52105294043962		Ortholog(s) have role in ER to Golgi vesicle-mediated transport, retrograde transport, endosome to Golgi and ER to Golgi transport vesicle, Golgi cis cisterna, Golgi membrane, endoplasmic reticulum localization	C5_04860C		Ortholog(s) have role in ER to Golgi vesicle-mediated transport, retrograde transport, endosome to Golgi and ER to Golgi transport vesicle, Golgi cis cisterna, Golgi membrane, endoplasmic reticulum localization	YMR292W	GOT1	Homodimeric protein that is packaged into COPII vesicles; cycles between the ER and Golgi; involved in secretory transport but not directly required for aspects of transport assayed in vitro; may influence membrane composition
	CAGL0E04422g	-1.49964348111499		Ortholog(s) have protein transporter activity, role in intracellular protein transport, retrograde transport, endosome to Golgi and cytosol, endosome, nucleus, retromer, cargo-selective complex localization	C1_00320W		Ortholog(s) have protein transporter activity, role in intracellular protein transport, retrograde transport, endosome to Golgi and cytosol, endosome, nucleus, retromer, cargo-selective complex localization	YHR012W	VPS29	Subunit of the membrane-associated retromer complex; endosomal protein; essential for endosome-to-Golgi retrograde transport; forms a subcomplex with Vps35p and Vps26p that selects cargo proteins for endosome-to-Golgi retrieval
	CAGL0I06358g	-1.46712404330463		Ortholog(s) have role in endocytosis, protein localization, retrograde transport, endosome to Golgi and AP-1 adaptor complex, Golgi apparatus, cytosol, endocytic vesicle, nucleus, ribosome localization	CR_01080W		Putative ortholog of S. cerevisiae Laa1p; likely to be essential for growth, based on an insertional mutagenesis strategy	YJL207C	LAA1	AP-1 accessory protein; colocalizes with clathrin to the late-Golgi apparatus; involved in TGN-endosome transport; physically interacts with AP-1; similar to the mammalian p200; may interact with ribosomes; YJL207C is a non-essential gene
	CAGL0M01144g	-1.42526266252789	MSN5	Ortholog(s) have nuclear export signal receptor activity, role in tRNA re-export from nucleus and cytosol, nuclear envelope localization	C4_03280W	MSN5	Predicted karyopherin involved in nuclear import and export of proteins; flow model biofilm induced; Spider biofilm induced	YDR335W	MSN5	Karyopherin; involved in nuclear import and export of proteins, including import of replication protein A and export of Far1p and transcription factors Swi5p, Swi6p, Msn2p, and Pho4p; required for re-export of mature tRNAs after their retrograde import from the cytoplasm; exportin-5 homolog
	CAGL0M05929g	-1.41953922081709		Ortholog(s) have role in protein import into mitochondrial matrix and plasma membrane, presequence translocase-associated import motor localization	C3_02500W	PAM17	Predicted component of the presequence translocase-associated import motor (PAM complex) involved in protein import into mitochondrial matrix	YKR065C	PAM17	Constituent of the TIM23 complex; proposed alternatively to be a component of the import motor (PAM complex) or to interact with and modulate the core TIM23 (Translocase of the Inner mitochondrial Membrane) complex; protein abundance increases in response to DNA replication stress
	CAGL0G04697g	-1.41231967483711		Ortholog(s) have role in protein targeting to vacuole, vacuolar acidification, vacuole inheritance and CORVET complex localization	CR_10590W		Ortholog of S. cerevisiae Vps3; CORVET tethering complex component involved in vacuolar protein sorting; Hap43-repressed gene	YDR495C	VPS3	Component of CORVET membrane tethering complex; cytoplasmic protein required for the sorting and processing of soluble vacuolar proteins, acidification of the vacuolar lumen, and assembly of the vacuolar H+-ATPase
	CAGL0L10494g	-1.40384580074973		Ortholog(s) have GTPase activator activity, role in hyphal growth, pathogenesis, vesicle-mediated transport and Golgi apparatus, cytosol, mitochondrion, nucleus localization	C4_04710W	GYP1	Putative Cis-golgi GTPase-activating protein; required for hyphen growth and virulence; transcript regulated by Nrg1, Mig1, and Tup1	YOR070C	GYP1	Cis-golgi GTPase-activating protein (GAP) for yeast Rabs; the Rab family members are Ypt1p (in vivo) and for Ypt1p, Sec4p, Ypt7p, and Ypt51p (in vitro); involved in vesicle docking and fusion
	CAGL0H01705g	-1.4015108728206		Ortholog(s) have FK506 binding, Hsp70 protein binding, chaperone binding, peptidyl-prolyl cis-trans isomerase activity, role in protein complex assembly and fungal-type vacuole, nucleus localization	C1_13260W		Ortholog(s) have FK506 binding, Hsp70 protein binding, chaperone binding, peptidyl-prolyl cis-trans isomerase activity, role in protein complex assembly and fungal-type vacuole, nucleus localization	YDR519W	FPR2	Membrane-bound peptidyl-prolyl cis-trans isomerase (PPIase); binds to the drugs FK506 and rapamycin; expression pattern suggests possible involvement in ER protein trafficking; relocalizes from nucleus to vacuole upon DNA replication stress; mutation is functionally complemented by human FKBP2
	CAGL0G09174g	-1.38401856004249		Ortholog(s) have role in Golgi to vacuole transport, protein targeting to vacuole and AP-3 adaptor complex, nucleus localization	C3_02590W	APL5	Ortholog of S. cerevisiae and S. pombe Apl5; subunit of the AP-3 adaptor complex involved in Golgi-to-vacuole transport; phosphorylated protein; mutant is viable;	YPL195W	APL5	Delta adaptin-like subunit of the clathrin associated protein complex; functions in transport of alkaline phosphatase to the vacuole via the alternate pathway; suppressor of loss of casein kinase 1 function; the clathrin associated protein complex is also known as AP-3
	CAGL0L00715g	-1.37430623799618		Ortholog(s) have role in endocytosis, phospholipid translocation, retrograde vesicle-mediated transport, Golgi to ER, vacuole organization and COPI-coated vesicle, Golgi membrane, endosome localization	C1_04630C		Ortholog(s) have role in endocytosis, phospholipid translocation, retrograde vesicle-mediated transport, Golgi to ER, vacuole organization and COPI-coated vesicle, Golgi membrane, endosome localization	YIL048W	NEO1	Phospholipid translocase (flippase), role in phospholipid asymmetry of plasma membrane; involved in endocytosis, vacuolar biogenesis and Golgi to ER vesicle-mediated transport; localizes to endosomes and the Golgi apparatus
	CAGL0K01925g	-1.36692520286421	GDI1	GDP dissociation inhibitor	C1_14440C	GDI1	Putative Rab GDP-dissociation inhibitor; GlcNAc-induced protein; Spider biofilm repressed	YER136W	GDI1	GDP dissociation inhibitor; regulates vesicle traffic in secretory pathways by regulating the dissociation of GDP from the Sec4/Ypt/rab family of GTP binding proteins
	CAGL0H07777g	-1.355721455401		Ortholog(s) have protein transporter activity, role in transcription factor import into nucleus and cytosol, nuclear envelope localization	C7_00340C		Ortholog(s) have protein transporter activity, role in transcription factor import into nucleus and cytosol, nuclear envelope localization	YGL241W	KAP114	Karyopherin, responsible for nuclear import of specific proteins; cargoes include Spt15p, Sua7p, histones H2A and H2B, and Nap1p; amino terminus shows similarity to those of other importins, particularly Cse1p; localization is primarily nuclear; function is regulated by sumoylation; protein abundance increases in response to DNA replication stress
	CAGL0H07909g	-1.3003678012709		Ortholog(s) have Rab GTPase binding activity and role in Golgi to plasma membrane transport, cellular bud site selection, exocytosis, hyphal growth	C4_04290W	SEC15	Exocyst subunit, involved in polarized growth; cellular bud tip-associated protein; interacts with Ras-related GTPase Rsr1p; ortholog of S. cerevisiae SEC15	YGL233W	SEC15	Essential 113 kDa subunit of the exocyst complex; the exocyst mediates polarized targeting and tethering of post-Golgi secretory vesicles to active sites of exocytosis prior to SNARE-mediated fusion; interacts with and functions as a downstream effector of active, GTP-bound Sec4p, a Rab family GTPase
	CAGL0K11253g	-1.29426566482006		Ortholog(s) have Rab guanyl-nucleotide exchange factor activity and role in ER to Golgi vesicle-mediated transport, chromosome organization	C1_02160W		Ortholog(s) have Rab guanyl-nucleotide exchange factor activity and role in ER to Golgi vesicle-mediated transport, chromosome organization	YDR246W	TRS23	Core component of transport protein particle (TRAPP) complexes I-III; TRAPP complexes are related multimeric guanine nucleotide-exchange factor for the GTPase Ypt1p, regulating ER-Golgi traffic (TRAPPI), intra-Golgi traffic (TRAPPII), endosome-Golgi traffic (TRAPPII and III) and autophagy (TRAPPIII); human homolog is TRAPPC4
	CAGL0M10703g	-1.27971794118526		Ortholog(s) have Sar guanyl-nucleotide exchange factor activity, role in regulation of COPII vesicle coating and Golgi apparatus, endoplasmic reticulum localization				YNR026C	SEC12	Guanine nucleotide exchange factor (GEF); activates Sar1p by catalyzing the exchange of GDP for GTP; required for the initiation of COPII vesicle formation in ER to Golgi transport; glycosylated integral membrane protein of the ER; SEC12 has a paralog, SED4, that arose from the whole genome duplication
	CAGL0K06501g	-1.27887714459073		Ortholog(s) have SNAP receptor activity, role in endocytosis, vesicle fusion and SNARE complex, endoplasmic reticulum, endosome, trans-Golgi network localization	C5_04150C		Ortholog(s) have SNAP receptor activity, role in endocytosis, vesicle fusion and SNARE complex, endoplasmic reticulum, endosome, trans-Golgi network localization	YDR468C	TLG1	Essential t-SNARE that mediates fusion of vesicles with the late Golgi; forms a complex with Tlg2p and Vti1p; mediates fusion of endosome-derived vesicles with the late Golgi; binds the docking complex VFT (Vps fifty-three) through interaction with Vps51p
	CAGL0F02123g	-1.27438526432348		Ortholog(s) have GTP binding, GTPase activity	CR_01750C	SEC4	Small GTPase of Rab family; role in post-Golgi secretion; possible C-terminal palmitoylation; downregulated on adherence to polystyrene; localizes to the Spitzenkorper during hyphal growth; functional homolog of S. cerevisiae Sec4p	YFL005W	SEC4	Rab family GTPase; essential for vesicle-mediated exocytic secretion and autophagy; associates with the exocyst component Sec15p and may regulate polarized delivery of transport vesicles to the exocyst at the plasma membrane
	CAGL0L11418g	-1.27019812927333		Ortholog(s) have role in CVT pathway, intra-Golgi vesicle-mediated transport and Golgi transport complex, cytosol localization	C2_06620W		Component of the conserved oligomeric Golgi complex; predicted to mediate fusion of transport vesicles to Golgi compartments; clade-associated gene expression	YML071C	COG8	Component of the conserved oligomeric Golgi complex; a cytosolic tethering complex (Cog1p through Cog8p) that functions in protein trafficking to mediate fusion of transport vesicles to Golgi compartments
	CAGL0L00891g	-1.26995035694517	GVP36	Putative Golgi vesicle protein; expression upregulated in biofilm vs planktonic cell culture	C4_05550C	GVP36	BAR domain protein; ocalizes to early and late Golgi vesicles; predicted role in adaptation to varying nutrient concentrations, fluid-phase endocytosis, actin cytoskeleton polarization and vacuole biogenesis; rat catheter biofilm repressed	YIL041W	GVP36	BAR domain protein that localizes to early and late Golgi vesicles; required for adaptation to varying nutrient concentrations, fluid-phase endocytosis, polarization of the actin cytoskeleton, and vacuole biogenesis
	CAGL0I06402g	-1.25955997013708		Ortholog(s) have ATP binding, ATPase activity, protein homodimerization activity	C5_03090W	VPS4	AAA-ATPase involved in transport from MVB to the vacuole and ESCRT-III complex disassembly; mutation decreases SAP secretion and virulence in murine intravenous infection; regulated by Gcn2p, Gcn4p; required for normal Rim8p processing	YPR173C	VPS4	AAA-ATPase involved in multivesicular body (MVB) protein sorting; ATP-bound Vps4p localizes to endosomes and catalyzes ESCRT-III disassembly and membrane release; ATPase activity is activated by Vta1p; regulates cellular sterol metabolism
	CAGL0L03113g	-1.2526758522441		Ortholog(s) have role in transport and endoplasmic reticulum, integral component of Golgi membrane localization	C1_14200W		Possible Golgi membrane protein; transcript positively regulated by Tbf1; mRNA binds She3	YKR030W	GMH1	Golgi membrane protein of unknown function; interacts with Gea1p and Gea2p; required for localization of Gea2p; computational analysis suggests a possible role in either cell wall synthesis or protein-vacuolar targeting
	CAGL0E04972g	-1.25246569997869		Ortholog(s) have protein homodimerization activity, role in retrograde vesicle-mediated transport, Golgi to ER and Dsl1/NZR complex, cytosol localization	C5_05110C	TIP20	Protein interacting with Sec20p, possibly involved in retrograde transport between the Golgi and the endoplasmic reticulum; similar to S. cerevisiae Tip20p	YGL145W	TIP20	Peripheral membrane protein required for COPI vesicle fusion to the ER; mediates Sey1p-independent homotypic ER fusion; prohibits back-fusion of COPII vesicles with the ER; forms a tethering complex with Sec39p and Dsl1p that interacts with ER SNAREs Sec20p and Use1p
	CAGL0F05819g	-1.25220367945482		Ortholog(s) have nucleus-vacuole junction localization	C1_03170C		Ortholog(s) have nucleus-vacuole junction localization	YDR179W-A	YDR179W-A	Protein with a potential role in tethering ER and vacuoles; localizes to nucleus-vacuole junctions in an Mdm1p-dependent manner; contains a lipid-binding PXA domain
	CAGL0C02607g	-1.23833403910576		Ortholog(s) have ATP binding, phosphatidylinositol binding activity	C2_05940C	VPS33	Ortholog(s) have ATP binding, phosphatidylinositol binding activity	YLR396C	VPS33	ATP-binding protein that is a subunit of the HOPS and CORVET complexes; essential for protein sorting, vesicle docking, and fusion at the vacuole; binds to SNARE domains
	CAGL0J03366g	-1.2375511700637	GET2	Ortholog(s) have protein anchor activity, role in protein insertion into ER membrane, retrograde vesicle-mediated transport, Golgi to ER and GET complex localization	C1_09750W		GET complex subunit; expression downregulated in an ssr1 null mutant	YER083C	GET2	Subunit of the GET complex; involved in insertion of proteins into the ER membrane; required for the retrieval of HDEL proteins from the Golgi to the ER in an ERD2 dependent fashion and for meiotic nuclear division
	CAGL0G05786g	-1.23184872748921		Ortholog(s) have unfolded protein binding activity	C4_03390W	CSH3	Functional homolog of S. cerevisiae Shr3p, which is a chaperone specific for amino acid permeases; localized to ER; required for wild-type amino-acid responsive hyphal growth and for mouse systemic virulence; regulated by Gcn2p and Gcn4p	YDL212W	SHR3	Endoplasmic reticulum packaging chaperone; required for incorporation of amino acid permeases into COPII coated vesicles for transport to the cell surface
	CAGL0B02585g	-1.22149720760154		Ortholog(s) have role in ER-dependent peroxisome organization, endoplasmic reticulum inheritance, endoplasmic reticulum tubular network maintenance, nuclear pore complex assembly, response to endoplasmic reticulum stress	C4_04800W		Ortholog(s) have role in ER-dependent peroxisome organization, endoplasmic reticulum inheritance, endoplasmic reticulum tubular network maintenance, nuclear pore complex assembly, response to endoplasmic reticulum stress	YDR233C	RTN1	Reticulon protein; involved in nuclear pore assembly and maintenance of tubular ER morphology; promotes membrane curvature; regulates the ER asymmetry-induced inheritance block during ER stress; role in ER-derived peroxisomal biogenesis; increases tubular ER when overexpressed; mutants have reduced phosphatidylserine transfer between the ER and mitochondria; interacts with exocyst subunit Sec6p, …
	CAGL0M00462g	-1.21969025964504		Ortholog(s) have COPI-coated vesicle, Golgi apparatus localization	C3_07740W		Ortholog(s) have COPI-coated vesicle, Golgi apparatus localization	YJR134C	SGM1	Protein of unknown function; required for wild-type growth rate on galactose and mannose; localizes to COPI coated vesicles and the Golgi apparatus
	CAGL0L10472g	-1.21801139610846		Ortholog(s) have phosphatidylinositol-3-phosphate binding, protein transporter activity	C4_06650W		Ortholog(s) have phosphatidylinositol-3-phosphate binding, protein transporter activity	YOR069W	VPS5	Nexin-1 homolog; required for localizing membrane proteins from a prevacuolar/late endosomal compartment back to late Golgi; structural component of retromer membrane coat complex; forms a retromer subcomplex with Vps17p; required for recruiting the retromer complex to the endosome membranes; VPS5 has a paralog, YKR078W, that arose from the whole genome duplication
	CAGL0A03784g	-1.19763514896881		Ortholog(s) have protein channel activity and role in apoptotic process, cellular response to oxidative stress, protein import into mitochondrial inner membrane, response to arsenic-containing substance, response to osmotic stress	C5_05280C	SDH4	Succinate dehydrogenase, membrane subunit; induced in high iron	YOR297C	TIM18	Component of the mitochondrial TIM22 complex; involved in insertion of polytopic proteins into the inner membrane; may mediate assembly or stability of the complex
	CAGL0G02915g	-1.19370480576796	PIL1	Long chain base-responsive inhibitor of protein kinases	C2_06730W	LSP1	Eisosome component with a predicted role in endocytosis; protein present in exponential and stationary growth phase yeast cultures; caspofungin repressed; biofilm induced; fungal-specific (no human/murine homolog); sumoylation target	YGR086C	PIL1	Eisosome core component; eisosomes are large immobile cell cortex structures associated with endocytosis; detected in phosphorylated state in mitochondria; phosphorylated on Thr233 upon Pkc1p hyperactivation in a Slt2p MAPK-dependent fashion; null mutant shows activation of Pkc1p/Ypk1p stress resistance pathways; member of BAR domain family; protein increases in abundance and relocalizes from pla…
	CAGL0F02739g	-1.17595042406577		Ortholog(s) have Rab guanyl-nucleotide exchange factor activity and role in early endosome to Golgi transport, intra-Golgi vesicle-mediated transport, regulation of GTPase activity	CR_10290C		Ortholog(s) have Rab guanyl-nucleotide exchange factor activity	YDR407C	TRS120	Component of transport protein particle (TRAPP) complex II; TRAPPII is a multimeric guanine nucleotide-exchange factor for the GTPase Ypt1p, regulating intra-Golgi and endosome-Golgi traffic
	CAGL0F04609g	-1.16950303313224		Ortholog(s) have ubiquitin binding activity and role in actin cortical patch organization, endocytosis, endoplasmic reticulum unfolded protein response, positive regulation of cytokinesis, regulation of protein localization	C1_11540C	CTA3	Protein similar to S. cerevisiae Ede1p, which is involved in endocytosis; activates transcription in 1-hybrid assay in S. cerevisiae	YBL047C	EDE1	Scaffold protein involved in the formation of early endocytic sites; putative regulator of cytokinesis; homo-oligomerization is required for localization to and organization of endocytic sites; has a network of interactions with other endocytic proteins; binds membranes in a ubiquitin-dependent manner; may also bind ubiquitinated membrane-associated proteins; interacts with Cmk2 and functions ups…
	CAGL0M09427g	-1.16718278641905		Ortholog(s) have role in retrograde transport, endosome to Golgi and Golgi membrane, Golgi trans cisterna, fungal-type vacuole membrane localization	C1_10770W	SFT2	Putative membrane protein; transcript regulated by Mig1; Spider biofilm induced	YBL102W	SFT2	Tetra-spanning membrane protein found mostly in the late Golgi; non-essential; can suppress some sed5 alleles; may be part of the transport machinery, but precise function is unknown; similar to mammalian syntaxin 5
	CAGL0H09196g	-1.13914059477068	VRG4	GDP-mannose transporter involved in glycosylation in the Golgi	C1_07700C	VRG4	GDP-mannose transporter; essential; required for glycosylation, hyphal growth; functional homolog of S. cerevisiae Vrg4p, which imports GDP-mannose from cytoplasm to Golgi for protein and lipid mannosylation; no mammalian homolog	YGL225W	VRG4	Golgi GDP-mannose transporter; regulates Golgi function and glycosylation in Golgi; VRG4 has a paralog, HVG1, that arose from the whole genome duplication
	CAGL0M11104g	-1.12280039212828		Ortholog(s) have P-P-bond-hydrolysis-driven protein transmembrane transporter activity, protein transporter activity, structural molecule activity	C3_06750W		Ortholog(s) have P-P-bond-hydrolysis-driven protein transmembrane transporter activity, protein transporter activity, structural molecule activity	YDR086C	SSS1	Subunit of the Sec61p translocation complex (Sec61p-Sss1p-Sbh1p); this complex forms a channel for passage of secretory proteins through the endoplasmic reticulum membrane, and of the Ssh1p complex (Ssh1p-Sbh2p-Sss1p); interacts with Ost4p and Wbp1p
	CAGL0H07095g	-1.12274921103005		Ortholog(s) have clathrin binding, ubiquitin binding activity	CR_08030C	FGR32	Protein similar to S. cerevisiae Swa2p; induced upon adherence to polystyrene; transposon mutation affects filamentous growth; Hap43p-repressed gene	YDR320C	SWA2	Auxilin-like protein involved in vesicular transport; clathrin-binding protein required for uncoating of clathrin-coated vesicles
	CAGL0G00176g	-1.11495280369255	ERV29	Ortholog(s) have COPII adaptor activity, role in ER to Golgi vesicle-mediated transport and ER to Golgi transport vesicle, Golgi apparatus, endoplasmic reticulum, plasma membrane localization	C4_02120W	ERV29	Putative SURF4 family member; plasma membrane-localized; flow model biofilm repressed	YGR284C	ERV29	Protein localized to COPII-coated vesicles; involved in vesicle formation and incorporation of specific secretory cargo; protein abundance increases in response to DNA replication stress
	CAGL0K06017g	-1.10591769758012		Ortholog(s) have GTP binding, GTPase activity	CR_06520C		Ortholog(s) have GTPase activity	YLR262C	YPT6	Rab family GTPase; required for endosome-to-Golgii, intra-Golgi retrograde, and retrograde Golgi-to-ER transport; temporarily at the Golgi, dissociating into the cytosol on arrival of the late Golgi GTPase Ypt32p; Golgi-localized form is GTP bound, while cytosolic form is GDP-bound; required for delivery of Atg9p to the phagophore assembly site during autophagy under heat stress, with Ypt6p for s…
	CAGL0K11660g	-1.09509726887894		Ortholog(s) have role in SRP-dependent cotranslational protein targeting to membrane, translocation and nucleus, signal recognition particle, endoplasmic reticulum targeting localization	C1_01940C		Ortholog of Srp21, signal recognition particle subunit, functions in protein targeting to the endoplasmic reticulum membrane; predicted adhesin-like protein; mutants are viable	YKL122C	SRP21	Subunit of the signal recognition particle (SRP); SRP functions in protein targeting to the endoplasmic reticulum membrane; not found in mammalian SRP; forms a pre-SRP structure in the nucleolus that is translocated to the cytoplasm
	CAGL0G08932g	-1.08818733445533		Ortholog(s) have SNAP receptor activity	C2_02210C	TLG2	Putative syntaxin-like t-SNARE; macrophage/pseudohyphal-repressed	YOL018C	TLG2	Syntaxin-like t-SNARE; forms a complex with Tlg1p and Vti1p and mediates fusion of endosome-derived vesicles with the late Golgi; required along with VPS45 for an early step of the constitutive CVT pathway; interactions with Vps45 prevents Tlg2p degradation, and facilitates t-SNARE complex formation; homologous to mammalian SNARE protein syntaxin 16 (Sx16)
	CAGL0K04653g	-1.08590702657479		Ortholog(s) have ubiquitin protein ligase binding activity and cytosol localization	C1_03400W		Ortholog(s) have ubiquitin protein ligase binding activity and cytosol localization	YGR068C	ART5	Protein proposed to regulate endocytosis of plasma membrane proteins; regulates by recruiting the ubiquitin ligase Rsp5p to its target in the plasma membrane; SWAT-GFP and mCherry fusion proteins localize to the cytosol
	CAGL0M08162g	-1.08403529472223		Ortholog(s) have role in Golgi vesicle transport and Golgi membrane localization	C2_03800C		Ortholog(s) have role in Golgi vesicle transport and Golgi membrane localization	YKL179C	COY1	Golgi membrane protein with similarity to mammalian CASP; genetic interactions with GOS1 (encoding a Golgi snare protein) suggest a role in Golgi function
	CAGL0F04455g	-1.07752398793459		Ortholog(s) have HDEL sequence binding activity, role in ER to Golgi vesicle-mediated transport, protein retention in ER lumen and Golgi apparatus, integral component of endoplasmic reticulum membrane localization	C4_02460W		Ortholog(s) have HDEL sequence binding activity, role in ER to Golgi vesicle-mediated transport, protein retention in ER lumen and Golgi apparatus, integral component of endoplasmic reticulum membrane localization	YBL040C	ERD2	HDEL receptor; an integral membrane protein that binds to the HDEL motif in proteins destined for retention in the endoplasmic reticulum; has a role in maintenance of normal levels of ER-resident proteins
	CAGL0H06941g	-1.07192156709141		Ortholog(s) have guanyl-nucleotide exchange factor activity, ubiquitin binding activity	C6_02630C		Ortholog(s) have guanyl-nucleotide exchange factor activity, ubiquitin binding activity	YML097C	VPS9	Guanine nucleotide exchange factor (GEF) and ubiquitin receptor; involved in vesicle-mediated vacuolar transport, including Golgi-endosome trafficking and sorting through the multivesicular body (MVB); stimulates the intrinsic guanine nucleotide exchange activity of Rab family members (Vps21p/Ypt52p/Ypt53p); partially redundant with GEF MUK1; required for localization of the CORVET complex to end…
	CAGL0F05665g	-1.06462496263968		Ortholog(s) have syntaxin binding activity and role in ER to Golgi vesicle-mediated transport, positive regulation of SNARE complex assembly, retrograde vesicle-mediated transport, Golgi to ER, vesicle fusion with Golgi apparatus	C4_06810C		Ortholog(s) have syntaxin binding activity and role in ER to Golgi vesicle-mediated transport, positive regulation of SNARE complex assembly, retrograde vesicle-mediated transport, Golgi to ER, vesicle fusion with Golgi apparatus	YDR189W	SLY1	Hydrophilic protein involved in ER/Golgi vesicle trafficking; SM (Sec1/Munc-18) family protein that binds the tSNARE Sed5p and stimulates its assembly into a trans-SNARE membrane-protein complex
	CAGL0J01419g	-1.02662131968315		Ortholog(s) have role in eisosome assembly and cell periphery, cytoplasm, eisosome, ribosome localization	C4_05610C		Putative eisosome component role in proper eisosome assembly; upregulated in cyr1 null mutant	YMR086W	SEG1	Component of eisosome required for proper eisosome assembly; precedes Pil1p/Lsp1p during eisosome formation, controls eisosome length and shape; diffusely distributed, forms heterogeneous patches at plasma membrane in small buds, also found in medium and large buds; expression repressed by cAMP; similar to A. gossypii SEG gene and to S. pombe Sle1p, important for generating eisosomes; SEG1 has a …
	CAGL0D03146g	-1.01993483593189		Ortholog(s) have role in Golgi to endosome transport, Golgi to plasma membrane protein transport, protein targeting to Golgi, vesicle organization and integral component of Golgi membrane, trans-Golgi network localization	C7_04330C	SYS1	Putative Golgi integral membrane protein; transcript regulated by Mig1	YJL004C	SYS1	Integral membrane protein of the Golgi; required for targeting of the Arf-like GTPase Arl3p to the Golgi; multicopy suppressor of ypt6 null mutation
	CAGL0L02409g	-1.01906656761399		Ortholog(s) have role in endosome organization, regulation of protein localization and BLOC-1 complex localization				YEL005C	VAB2	Subunit of the BLOC-1 complex involved in endosomal maturation; interacts with Vps21p-GFP; has potential role in vacuolar function, as suggested by its ability to bind Vac8p; likely member of; Vab2p-GFP-fusion localizes to cytoplasm in punctate pattern
	CAGL0J10340g	-1.00027727343341		Ortholog(s) have role in positive regulation of TORC1 signaling and Seh1-associated complex, cytosol, extrinsic component of fungal-type vacuolar membrane, nuclear periphery, nuclear pore outer ring localization	C2_07950W	SEH1	Ortholog(s) have role in positive regulation of TORC1 signaling and Seh1-associated complex, cytosol, extrinsic component of fungal-type vacuolar membrane, nuclear periphery, nuclear pore outer ring localization	YGL100W	SEH1	Subunit of the Nup84 nuclear pore and SEACAT subcomplexes; involved in nucleocytoplasmic transport and NPC biogenesis in the nuclear pore subcomplex; subunit of SEACAT, a subcomplex of the SEA complex that inhibits the TORC1 inhibitory role of SEACIT (Iml1p-Npr2p-Npr3p), a GAP for Gtr1p in response to amino acid limitation, thereby resulting in activation of TORC1 signaling; SEA is a coatomer-rel…
	CAGL0J01001g	1.00444052885583		Ortholog(s) have phosphatidylinositol-3-phosphate binding activity and role in CVT pathway, early endosome to Golgi transport, mitophagy, piecemeal microautophagy of nucleus	C2_01350C	SNX4	Putative sorting nexin; induced during the mating process	YJL036W	SNX4	Sorting nexin; involved in retrieval of late-Golgi SNAREs from post-Golgi endosomes to the trans-Golgi network and in cytoplasm to vacuole transport; contains a PX phosphoinositide-binding domain; forms complexes with Snx41p and with Atg20p
	CAGL0K11363g	1.01997994182327		Ortholog(s) have phospholipid binding activity, role in vacuole fusion, non-autophagic and fungal-type vacuole membrane localization				YDR229W	IVY1	Phospholipid-binding protein that interacts with both Ypt7p and Vps33p; may partially counteract the action of Vps33p and vice versa, localizes to the rim of the vacuole as cells approach stationary phase
	CAGL0I05412g	1.07033117473835		Ortholog(s) have structural constituent of nuclear pore activity	C4_01660W		Ortholog(s) have structural constituent of nuclear pore activity	YKL057C	NUP120	Subunit of the Nup84p subcomplex of the nuclear pore complex (NPC); contributes to nucleocytoplasmic transport and NPC biogenesis and is involved in establishment of a normal nucleocytoplasmic concentration gradient of the GTPase Gsp1p; also plays roles in several processes that may require localization of genes or chromosomes at the nuclear periphery, including double-strand break repair, transc…
	CAGL0C01441g	1.09367173133391		Ortholog(s) have role in endocytic recycling and cytosol, endosome, nucleus localization	C6_04530C		Ortholog(s) have role in endocytic recycling and cytosol, endosome, nucleus localization	YPL183C	RTT10	WD40 domain-containing protein involved in endosomal recycling; forms a complex with Rrt2p that functions in the retromer-mediated pathway for recycling internalized cell-surface proteins; interacts with Trm7p for 2'-O-methylation of N34 of substrate tRNAs; has a role in regulation of Ty1 transposition; human ortholog is WDR6
	CAGL0C05445g	1.12322197231411		Ortholog(s) have role in endocytosis and cell periphery localization	C1_01460W		Ortholog of Bre4 in S. cerevisiae has a role in brefeldin A resistence; a drug that affect intracellular transport; Spider biofilm induced	YDL231C	BRE4	Zinc finger protein containing five transmembrane domains; null mutant exhibits strongly fragmented vacuoles and sensitivity to brefeldin A, a drug which is known to affect intracellular transport
	CAGL0C04719g	1.12335080578695		Ortholog(s) have structural molecule activity	C5_04580C		Ortholog(s) have structural molecule activity	YJR102C	VPS25	Component of the ESCRT-II complex; ESCRT-II is involved in ubiquitin-dependent sorting of proteins into the endosome
	CAGL0M00506g	1.13865059236154		Ortholog(s) have protein transporter activity, role in protein import into nucleus and cytosol, nuclear envelope, nuclear periphery localization	C4_00540C	NMD5	Karyopherin; carrier protein involved in nuclear import of proteins; repressed in core stress response; Hap43-induced; Spider biofilm induced	YJR132W	NMD5	Karyopherin; a carrier protein involved in nuclear import of proteins; importin beta homolog
	CAGL0L02959g	1.14436346089879		Ortholog(s) have ubiquitin protein ligase binding activity, role in endocytosis, positive regulation of ubiquitin-dependent endocytosis, regulation of intracellular transport and cytosol, early endosome, late endosome localization				YKR021W	ALY1	Alpha arrestin, substrate of calcineurin; controls nutrient-mediated intracellular sorting of permease Gap1p; interacts with AP-1 subunit Apl4p; dephosphorylation of Aly1p required for the endocytosis of Dip5p; may regulate endocytosis of plasma membrane proteins by recruiting ubiquitin ligase Rsp5p to plasma membrane targets; ALY1 has a paralog, ALY2, that arose from the whole genome duplication
	CAGL0K02299g	1.17954795377677		Ortholog(s) have protein kinase activity, role in protein phosphorylation, vesicle-mediated transport and fungal-type vacuole membrane, nucleus, plasma membrane localization	C2_08270C		Putative casein kinase; plasma membrane-localized	YER123W	YCK3	Palmitoylated vacuolar membrane-localized casein kinase I isoform; negatively regulates vacuole fusion during hypertonic stress via phosphorylation of Vps41p; shares essential functions with Hrr25p; regulates vesicle fusion in AP-3 pathway
	CAGL0I07381g	1.18352821101435		Ortholog(s) have COPI-coated vesicle, Golgi apparatus localization	C1_02410C		Ortholog(s) have COPI-coated vesicle, Golgi apparatus localization	YOL107W	YOL107W	Putative protein of unknown function; green fluorescent protein (GFP)-fusion protein localizes to the cytoplasm and colocalizes in a punctate pattern with the early golgi/COPI vesicles; YOL107W is not an essential protein
	CAGL0C05489g	1.23606673615132		Ortholog(s) have GTPase activator activity, role in regulation of vacuole fusion, non-autophagic, vesicle-mediated transport and cytosol, nucleus localization	C7_03490W	GYP7	Protein similar to S. cerevisiae Gyp7p (GTPase-activating protein for Ypt1p); caspofungin-induced	YDL234C	GYP7	GTPase-activating protein for yeast Rab family members; members include Ypt7p (most effective), Ypt1p, Ypt31p, and Ypt32p (in vitro); involved in vesicle mediated protein trafficking; contains a PH-like domain
	CAGL0E02189g	1.25274558664623		Ortholog(s) have palmitoyltransferase activity, role in protein palmitoylation, protein targeting to membrane and endoplasmic reticulum palmitoyltransferase complex, extrinsic component of endoplasmic reticulum membrane localization	C5_01170W		Ortholog(s) have palmitoyltransferase activity, role in protein palmitoylation, protein targeting to membrane and endoplasmic reticulum palmitoyltransferase complex, extrinsic component of endoplasmic reticulum membrane localization	YOL110W	SHR5	Palmitoyltransferase subunit; this complex adds a palmitoyl lipid moiety to heterolipidated substrates such as Ras1p and Ras2p through a thioester linkage; palmitoylation is required for Ras2p membrane localization; Palmitoyltransferase is composed of Shr5p and Erf2
	CAGL0G02211g	1.27673478807883		Ortholog(s) have structural constituent of nuclear pore activity	C2_05220C		Ortholog(s) have structural constituent of nuclear pore activity	YKR082W	NUP133	Subunit of Nup84p subcomplex of nuclear pore complex (NPC); contributes to nucleocytoplasmic transport, NPC biogenesis; is involved in establishment of a normal nucleocytoplasmic concentration gradient of GTPase Gsp1p; also plays roles in several processes that may require localization of genes or chromosomes at nuclear periphery, including double-strand break repair, transcription and chromatin …
	CAGL0F03113g	1.28443146702323		Ortholog(s) have phosphatidylinositol-3-phosphate binding activity, role in retrograde transport, endosome to Golgi and cytosol, endosome localization	C2_01310W		Ortholog(s) have phosphatidylinositol-3-phosphate binding activity, role in retrograde transport, endosome to Golgi and endosome localization	YDR425W	SNX41	Sorting nexin; involved in the retrieval of late-Golgi SNAREs from the post-Golgi endosome to the trans-Golgi network; interacts with Snx4p
	CAGL0D03212g	1.30858802579072		Ortholog(s) have role in nuclear pore organization, protein import into nucleus, spindle pole body duplication and integral component of nuclear outer membrane, nuclear periphery, nuclear pore transmembrane ring localization				YLR018C	POM34	Subunit of the transmembrane ring of the nuclear pore complex (NPC); contributes to nucleocytoplasmic transport, NPC biogenesis and spindle pole body duplication
	CAGL0G04543g	1.32038645760532		Ortholog(s) have role in cellular response to drug, filamentous growth, late endosome to vacuole transport via multivesicular body sorting pathway and fungal-type vacuole membrane localization	C6_01830W	CTA1	Protein similar to S. cerevisiae Mos10p, which affects S. cerevisiae filamentous growth; activates transcription in 1-hybrid assay in S. cerevisiae; protein levels increase under weak acid stress; nonessential	YDR486C	VPS60	Protein involved in late endosome to vacuole transport; cytoplasmic and vacuolar membrane protein; required for normal filament maturation during pseudohyphal growth; may function in targeting cargo proteins for degradation; interacts with Vta1p
	CAGL0F05599g	1.35411571341027		Ortholog(s) have nucleocytoplasmic transporter activity, structural constituent of nuclear pore activity	C3_04700W		Ortholog(s) have nucleocytoplasmic transporter activity, structural constituent of nuclear pore activity	YDR192C	NUP42	FG-nucleoporin component of central core of the nuclear pore complex; also part of the nuclear pore complex (NPC) cytoplasmic filaments; contributes directly to nucleocytoplasmic transport and maintenance of the NPC permeability barrier and is involved in gene tethering at the nuclear periphery; interacts with Gle1p
	CAGL0J05368g	1.42344932275992		Ortholog(s) have SNAP receptor activity, role in retrograde vesicle-mediated transport, Golgi to ER and SNARE complex, integral component of cytoplasmic side of endoplasmic reticulum membrane localization	C6_02680W		Ortholog(s) have SNAP receptor activity, role in retrograde vesicle-mediated transport, Golgi to ER and SNARE complex, integral component of cytoplasmic side of endoplasmic reticulum membrane localization	YGL098W	USE1	Essential SNARE protein localized to the ER; involved in retrograde traffic from the Golgi to the ER and Sey1p-independent homotypic ER fusion; required for efficient nuclear fusion during mating; forms a complex with the SNAREs Sec22p, Sec20p and Ufe1p
	CAGL0M00616g	1.43099631356634		Ortholog(s) have role in protein targeting to vacuole and endoplasmic reticulum localization	C7_00170W	VPS70	Ortholog(s) have role in protein targeting to vacuole and endoplasmic reticulum localization	YJR126C	VPS70	Protein of unknown function involved in vacuolar protein sorting; SWAT-GFP and mCherry fusion proteins localize to the endoplasmic reticulum
	CAGL0B01925g	1.50238262520827		Ortholog(s) have protein serine/threonine kinase activity, role in exocytosis, protein autophosphorylation and cytoplasmic side of plasma membrane localization				YDR122W	KIN1	Serine/threonine protein kinase involved in regulation of exocytosis; localizes to the cytoplasmic face of the plasma membrane; KIN1 has a paralog, KIN2, that arose from the whole genome duplication
	CAGL0J08591g	1.52780107046744		Ortholog(s) have lipid binding activity, role in endoplasmic reticulum membrane organization, regulation of phosphatidylinositol dephosphorylation and cortical endoplasmic reticulum, mitochondrion, plasma membrane localization	C1_10680C		Predicted lipid-binding ER protein; involved in ER-plasma membrane tethering; Spider biofilm induced	YOR086C	TCB1	Lipid-binding ER protein involved in ER-plasma membrane tethering; one of 6 proteins (Ist2p, Scs2p, Scs22p, Tcb1p, Tcb2p, Tcb3p) that connect ER to plasma membrane and regulate PI4P levels by controlling access of Sac1p phosphatase to its substrate PI4P in PM; contains 3 calcium and lipid binding domains; non-tagged protein also localizes to mitochondria; C-termini of Tcb1p, Tcb2p and Tcb3p inter…
	CAGL0L07062g	1.65093850483775		Ortholog(s) have nucleocytoplasmic transporter activity, phospholipid binding, single-stranded DNA binding activity and role in mRNA export from nucleus in response to heat stress, nuclear pore organization	C4_03850W		Ortholog(s) have nucleocytoplasmic transporter activity, phospholipid binding, single-stranded DNA binding activity and role in mRNA export from nucleus in response to heat stress, nuclear pore organization	YDL088C	ASM4	FG-nucleoporin component of central core of nuclear pore complex (NPC); contributes directly to nucleocytoplasmic transport; induces membrane tubulation, which may contribute to nuclear pore assembly; ASM4 has a paralog, NUP53, that arose from the whole genome duplication
	CAGL0M10417g	1.65440782817486		Ortholog(s) have role in vesicle-mediated transport and fungal-type vacuole membrane, vesicle localization				YDR003W	RCR2	Vacuolar protein; presumably functions within the endosomal-vacuolar trafficking pathway, affecting events that determine whether plasma membrane proteins are degraded or routed to the plasma membrane; RCR2 has a paralog, RCR1, that arose from the whole genome duplication
	CAGL0M11396g	1.65641873126598		Ortholog(s) have protein serine/threonine kinase activity	CR_00260W	KIN2	Protein with similarity to S. cerevisiae Kin2p, transcription is positively regulated by Tbf1	YLR096W	KIN2	Serine/threonine protein kinase involved in regulation of exocytosis; localizes to the cytoplasmic face of the plasma membrane; KIN2 has a paralog, KIN1, that arose from the whole genome duplication
	CAGL0I10516g	1.69650043701845		Ortholog(s) have role in fungal-type cell wall organization, pathogenesis and cytoplasm, eisosome, integral component of plasma membrane, membrane raft localization	C3_07310C	SLK19	Alkaline-induced protein of plasma membrane; affects cell aggregation, cell wall; similar to S. cerevisiae Slk19p (a kinetochore protein with roles in mitosis, meiosis); required for wild-type virulence in mouse; macrophage-downregulated	YGR130C	YGR130C	Component of the eisosome with unknown function; GFP-fusion protein localizes to the cytoplasm; specifically phosphorylated in vitro by mammalian diphosphoinositol pentakisphosphate (IP7)
	CAGL0I01144g	1.71752114918524		Ortholog(s) have phosphatidylinositol-3-phosphate binding activity and endosome localization	C5_02980C		Ortholog(s) have phosphatidylinositol-3-phosphate binding activity and endosome localization	YHR105W	YPT35	Endosomal protein of unknown function; contains a phox (PX) homology domain; binds to both phosphatidylinositol-3-phosphate (PtdIns(3)P) and proteins involved in ER-Golgi or vesicular transport
	CAGL0B02519g	1.75086732528568		Ortholog(s) have cytochrome-b5 reductase activity, acting on NAD(P)H activity, role in chronological cell aging, protein transport, replicative cell aging and endoplasmic reticulum, plasma membrane localization	CR_09110C		Putative oxidoreductase; similar to S. cerevisiae Pga3p; possible Kex2p substrate	YML125C	PGA3	Putative cytochrome b5 reductase, localized to the plasma membrane; may be involved in regulation of lifespan; required for maturation of Gas1p and Pho8p, proposed to be involved in protein trafficking; PGA3 has a paralog, AIM33, that arose from the whole genome duplication
	CAGL0H06809g	1.80985897116551		Putative component of Golgi-associated retrograde protein complex; gene is upregulated in azole-resistant strain
	CAGL0B04477g	1.98361966555084		Ortholog(s) have cellular bud neck, fungal-type vacuole membrane, plasma membrane localization	C4_00860C		Protein of unknown function; induced in cyr1 or ras1 mutant; induced by fluconazole, by alpha pheromone in SpiderM medium and during oralpharyngeal candidasis; Spider biofilm induced	YOR104W	PIN2	Exomer-dependent cargo protein; induces appearance of [PIN+] prion when overproduced; prion-like domain serves as a retention signal in the trans-Golgi network; predicted to be palmitoylated
	CAGL0G03773g	1.99941558812121		Ortholog(s) have structural constituent of nuclear pore activity	C1_04200C		Ortholog(s) have structural constituent of nuclear pore activity	YLL023C	POM33	Transmembrane nucleoporin; involved in nuclear pore complex (NPC) distribution, assembly or stabilization; highly conserved across species, orthologous to human TMEM33 and paralogous to Per33p; protein abundance increases in response to DNA replication stress
	CAGL0L04928g	2.09858344761361		Ortholog(s) have nucleocytoplasmic transporter activity, structural constituent of nuclear pore activity				YKL068W	NUP100	FG-nucleoporin component of central core of the nuclear pore complex; contributes directly to nucleocytoplasmic transport and maintenance of the nuclear pore complex (NPC) permeability barrier and is involved in gene tethering at the nuclear periphery; NUP100 has a paralog, NUP116, that arose from the whole genome duplication
	CAGL0L08932g	2.28371603570691	LSP1	Long chain base-responsive inhibitor of protein kinases; protein abundance decreased in ace2 mutant cells	C1_04680W	PIL1	Eisosome component; predicted role in endocytosis; echinocandin-binding protein; localizes to cell surface of hyphae, but not yeast-form cells; Hap43, YNB biofilm induced; rat catheter biofilm repressed	YPL004C	LSP1	Eisosome core component; eisosomes are large immobile patch structures at the cell cortex associated with endocytosis; phosphorylated on Thr233 upon Pkc1p hyperactivation in a Slt2p MAPK-dependent fashion; null mutants show activation of Pkc1p/Ypk1p stress resistance pathways; member of the BAR domain family
	CAGL0L00737g	2.50752097454584		Ortholog(s) have role in signal transduction and Golgi apparatus, endoplasmic reticulum, fungal-type vacuole membrane, mitochondrion, plasma membrane localization	C1_04760C	SYG1	Ortholog(s) have role in signal transduction and Golgi apparatus, endoplasmic reticulum, fungal-type vacuole membrane, mitochondrion, plasma membrane localization	YIL047C	SYG1	Plasma membrane protein of unknown function; truncation and overexpression suppresses lethality of G-alpha protein deficiency
	CAGL0M03135g	2.94883619133529		Ortholog(s) have protein binding, bridging, ubiquitin protein ligase binding activity and role in positive regulation of ubiquitin-dependent endocytosis, regulation of intracellular transport	C6_03180C		Ortholog(s) have protein binding, bridging, ubiquitin protein ligase binding activity and role in positive regulation of ubiquitin-dependent endocytosis, regulation of intracellular transport	YJL084C	ALY2	Alpha arrestin; controls nutrient-mediated intracellular sorting of permease Gap1p; interacts with AP-1 subunit Apl4p; phosphorylated by Npr1p and also by cyclin-CDK complex Pcl7p-Pho85p; promotes endocytosis of plasma membrane proteins; ALY2 has a paralog, ALY1, that arose from the whole genome duplication
	CAGL0D00836g	3.04885293290078		Ortholog(s) have unfolded protein binding activity, role in protein import into nucleus, ribosomal large subunit biogenesis and cytosol, nucleus localization	CR_08500W		Ortholog(s) have unfolded protein binding activity, role in protein import into nucleus, ribosomal large subunit biogenesis and cytoplasm, nucleus localization	YDL063C	SYO1	Transport adaptor or symportin; facilitates synchronized nuclear coimport of the two 5S-rRNA binding proteins Rpl5p and Rpl11p; binds to nascent Rpl5p during translation; required for biogenesis of the large ribosomal subunit; green fluorescent protein (GFP)-fusion protein localizes to the cytoplasm and nucleus
	CAGL0I07007g	3.13399806956309		Ortholog(s) have role in mitochondrion organization, mitochondrion-ER tethering, phospholipid transport and ERMES complex localization	C1_06230C	MDM34	Putative zinc finger transcription factor; macrophage-downregulated; flow model biofilm induced; flow model and Spider biofilm induced	YGL219C	MDM34	Mitochondrial component of the ERMES complex; links the ER to mitochondria and may promote inter-organellar calcium and phospholipid exchange as well as coordinating mitochondrial DNA replication and growth; required for mitophagy; ERMES complex is often co-localized with peroxisomes and with concentrated areas of pyruvate dehydrogenase
	CAGL0I10494g	3.23577178399483		Ortholog(s) have role in eisosome assembly, establishment of protein localization to plasma membrane and Golgi apparatus, eisosome, growing cell tip, membrane raft, plasma membrane localization				YGR131W	FHN1	Protein of unknown function; induced by ketoconazole; promoter region contains sterol regulatory element motif, which has been identified as a Upc2p-binding site; overexpression complements function of Nce102p in NCE102 deletion strain; FHN1 has a paralog, NCE102, that arose from the whole genome duplication
	CAGL0J04906g	3.32276945499118		Ortholog(s) have cytoplasm localization	C4_05160C		Has domain(s) with predicted role in protein transport, vacuolar transport	YJL049W	YJL049W	Yeast homolog of human CHMP7, localizes to the endoplasmic reticulum presumably as part of an ESCRT-III like complex; null mutant has growth defect at 37 C in an apq12 deletion background; non-essential gene
	CAGL0G04081g	3.33972656240543		Ortholog(s) have Golgi apparatus, cell division site, cell periphery, cell tip, endoplasmic reticulum localization	C4_04230W		Putative transporter; fungal-specific; Spider biofilm induced	YLR004C	THI73	Putative plasma membrane permease; proposed to be involved in carboxylic acid uptake and repressed by thiamine; substrate of Dbf2p/Mob1p kinase; transcription is altered if mitochondrial dysfunction occurs
	CAGL0I09724g	3.81569880669174		Has domain(s) with predicted role in transmembrane transport and integral component of membrane localization
	CAGL0J00715g	4.67554496722576		Has domain(s) with predicted GTP binding, GTPase activity, role in protein transport, signal transduction, small GTPase mediated signal transduction and intracellular, membrane localization				YHR022C	YHR022C	Putative protein of unknown function; YHR022C is not an essential gene
Cell wall organization	CAGL0D01034g	-4.93594858006695	VIG9	GDP-mannose pyrophosphorylase involved in the synthesis of GDP-mannose for protein glycosylation	C3_07950C	SRB1	Essential GDP-mannose pyrophosphorylase; makes GDP-mannose for protein glycosylation; functional in S. cerevisiae psa1; on yeast-form, not hyphal cell surface; alkaline induced; induced on adherence to polystyrene; Spider biofilm repressed	YDL055C	PSA1	GDP-mannose pyrophosphorylase (mannose-1-phosphate guanyltransferase); synthesizes GDP-mannose from GTP and mannose-1-phosphate in cell wall biosynthesis; required for normal cell wall structure
	CAGL0I06160g	-4.82148975996513	PIR4	Pir protein family member, putative cell wall component				YJL158C	CIS3	Mannose-containing glycoprotein constituent of the cell wall; member of the PIR (proteins with internal repeats) family
	CAGL0I04818g	-4.47519652715729		Ortholog(s) have chitin synthase activity	C7_02770W	CHS1	Chitin synthase; essential; for primary septum synthesis in yeast and hyphae; 1 of several chitin synthases; enzymatically activated by proteolytic processing; complements defects of S. cerevisiae chs1 or chs2; Spider biofilm repressed	YBR038W	CHS2	Chitin synthase II; catalyzes transfer of N-acetylglucosamine (GlcNAc) to chitin upon activation of zymogenic form; required for chitin synthesis in the primary septum during cytokinesis; localization regulated by Cdk1p during mitosis; phosphorylation by Dbf2p kinase regulates its dynamics and chitin synthesis during cytokinesis
	CAGL0M08756g	-4.30761975874411		Putative exo-1,3-beta-glucanase; predicted GPI-anchor	C1_02630C	EXG2	GPI-anchored cell wall protein, similar to S. cerevisiae exo-1,3-beta-glucosidase Exg2p; predicted Kex2p substrate; induced during cell wall regeneration; possibly an essential gene, disruptants not obtained by UAU1 method; Hap43p-repressed	YDR261C	EXG2	Exo-1,3-beta-glucanase; involved in cell wall beta-glucan assembly; may be anchored to the plasma membrane via a glycosylphosphatidylinositol (GPI) anchor
	CAGL0M03773g	-4.20169530946103		Predicted GPI-linked adhesin-like protein				YNL300W	TOS6	Glycosylphosphatidylinositol-dependent cell wall protein; expression is periodic and decreases in respone to ergosterol perturbation or upon entry into stationary phase; depletion increases resistance to lactic acid
	CAGL0G08668g	-4.14430758196996		Ortholog(s) have role in fungal-type cell wall organization and endoplasmic reticulum, fungal-type cell wall localization				YIL123W	SIM1	Protein of the SUN family (Sim1p, Uth1p, Nca3p, Sun4p); may participate in DNA replication; promoter contains SCB regulation box at -300 bp indicating that expression may be cell cycle-regulated; SIM1 has a paralog, SUN4, that arose from the whole genome duplication
	CAGL0M08514g	-4.12752890530874	PIR5	Pir protein family member, putative cell wall component				YKL163W	PIR3	O-glycosylated covalently-bound cell wall protein; required for cell wall stability; expression is cell cycle regulated, peaking in M/G1 and also subject to regulation by the cell integrity pathway; coding sequence contains length polymorphisms in different strains; PIR3 has a paralog, HSP150, that arose from the whole genome duplication
	CAGL0I06204g	-4.01975282184051	PIR1	Pir protein family member, putative cell wall component				YJL160C	YJL160C	Putative protein of unknown function; member of the PIR (Proteins with Internal Repeats) family of cell wall proteins; SWAT-GFP fusion protein localizes to the endoplasmic reticulum and vacuole, and mCherry fusion localizes to the vacuole; non-essential gene that is required for sporulation; mRNA is weakly cell cycle regulated, peaking in mitosis; YJL160C has a paralog, PIR1, that arose from the …
	CAGL0E04620g	-3.95772286333688	PST1	Ecm33-family protein with a predicted role in cell wall biogenesis and organization; predicted GPI-anchor				YDR055W	PST1	Cell wall protein that contains a putative GPI-attachment site; secreted by regenerating protoplasts; up-regulated by activation of the cell integrity pathway, as mediated by Rlm1p; upregulated by cell wall damage via disruption of FKS1; PST1 has a paralog, ECM33, that arose from the whole genome duplication
	CAGL0F07601g	-3.85174628512212	CWP1.1	GPI-linked cell wall protein				YKL096W-A	CWP2	Covalently linked cell wall mannoprotein; major constituent of the cell wall; plays a role in stabilizing the cell wall; involved in low pH resistance; precursor is GPI-anchored
	CAGL0G09449g	-3.66916834753834	CRH1	Putative glycoside hydrolase; predicted GPI-anchor	C4_02900C	CRH11	GPI-anchored cell wall transglycosylase, putative ortholog of S. cerevisiae Crh1p; predicted glycosyl hydrolase domain; similar to Csf4p and to antigenic A. fumigatus Aspf9; predicted Kex2p substrate; caspofungin-induced	YGR189C	CRH1	Chitin transglycosylase; functions in the transfer of chitin to beta(1-6) and beta(1-3) glucans in the cell wall; similar and functionally redundant to Utr2; localizes to sites of polarized growth; expression induced by cell wall stress
	CAGL0M05599g	-3.51483315562939		Ortholog(s) have cell surface, endoplasmic reticulum, extracellular region, fungal-type vacuole, hyphal cell wall localization	C3_01550C	TOS1	Protein similar to alpha agglutinin anchor subunit; secreted; exogenously expressed protein is a substrate for Kex2 processing in vitro; fluconazole-induced; induced by alpha pheromone in SpiderM medium; Hap43-induced	YBR162C	TOS1	Covalently-bound cell wall protein of unknown function; identified as a cell cycle regulated SBF target gene; deletion mutants are highly resistant to treatment with beta-1,3-glucanase; has sequence similarity to YJL171C
	CAGL0M13321g	-3.18692790048584		Ortholog(s) have COPII adaptor activity and role in ER to Golgi vesicle-mediated transport, fungal-type cell wall organization, protein glycosylation, protein retention in Golgi apparatus	C1_11600W		Ortholog(s) have COPII adaptor activity and role in ER to Golgi vesicle-mediated transport, fungal-type cell wall organization, protein glycosylation, protein retention in Golgi apparatus	YHR181W	SVP26	Integral membrane protein of the early Golgi apparatus and ER; involved in COP II vesicle transport; may also function to promote retention of proteins in the early Golgi compartment
	CAGL0A01474g	-3.05786625560811		Ortholog(s) have cell surface, extracellular region, fungal-type cell wall localization	C5_04110W	SCW11	Cell wall protein; repressed in ace2 mutant; repressed in core caspofungin response; induced in high iron; possibly an essential gene, disruptants not obtained by UAU1 method; rat catheter and Spider biofilm repressed	YGL028C	SCW11	Cell wall protein with similarity to glucanases; may play a role in conjugation during mating based on its regulation by Ste12p
	CAGL0C02101g	-3.02484802403914		Ortholog(s) have role in (1->6)-beta-D-glucan biosynthetic process, chromosome organization and integral component of endoplasmic reticulum membrane localization	CR_05140W		Integral membrane protein of the ER; role in the synthesis of beta-1,6-glucan in the cell wall; S. cerevisiae ortholog required for cell viability; Spider biofilm induced	YFR042W	KEG1	Integral membrane protein of the ER; physically interacts with Kre6p; has a role in the synthesis of beta-1,6-glucan in the cell wall; required for cell viability
	CAGL0M08448g	-3.01924879476438		Ortholog(s) have mannose-ethanolamine phosphotransferase activity and role in ATP transport, GPI anchor biosynthetic process, conidium formation, regulation of growth rate	C1_12200W	MCD4	Protein of major facilitator superfamily; has phosphodiesterase/nucleotide pyrophosphatase domain; similar to S. cerevisiae Mcd4p, which acts in GPI anchor biosynthesis; possibly an essential gene, disruptants not obtained by UAU1 method	YKL165C	MCD4	Protein involved in GPI anchor synthesis; multimembrane-spanning protein that localizes to the endoplasmic reticulum; highly conserved among eukaryotes; GPI stands for glycosylphosphatidylinositol
	CAGL0G00286g	-2.98954753774317	GAS1	Putative glycoside hydrolase of the Gas/Phr family; predicted GPI-anchor
	CAGL0M11572g	-2.92247163646063		Ortholog(s) have role in ER-associated ubiquitin-dependent protein catabolic process and fungal-type vacuole localization	CR_05800C		Ortholog(s) have role in ER-associated ubiquitin-dependent protein catabolic process and fungal-type vacuole localization	YLR104W	LCL2	Putative protein of unknown function; mutant is deficient in cell wall mannosylphosphate and has long chronological lifespan; genetic interactions suggest a role in ER-associated protein degradation (ERAD); SWAT-GFP fusion protein localizes to the endoplasmic reticulum and vacuole, while mCherry fusion localizes to just the vacuole
	CAGL0L12232g	-2.9195676294234		Ortholog(s) have role in attachment of GPI anchor to protein and GPI-anchor transamidase complex localization	C5_00040C		Subunit of the GPI (glycosylphosphatidylinositol):protein transamidase complex; removes the GPI-anchor signal and attaches GPI to proteins in the ER; Spider biofilm repressed	YLR088W	GAA1	Subunit of the GPI:protein transamidase complex; removes the GPI-anchoring signal and attaches GPI (glycosylphosphatidylinositol) to proteins in the ER; human homolog GPAA1 can complement growth defects of yeast thermosensitive mutant at restrictive temperature
	CAGL0J05236g	-2.91543631206463	LAS21	Ortholog(s) have mannose-ethanolamine phosphotransferase activity	C1_05070C	GPI7	Protein involved in attachment of GPI-linked proteins to cell wall; member of major facilitator superfamily; phosphodiesterase/nucleotide pyrophosphatase domain; similar to S. cerevisiae Gpi7p	YJL062W	LAS21	Integral plasma membrane protein; involved in the synthesis of the glycosylphosphatidylinositol (GPI) core structure; mutations affect cell wall integrity
	CAGL0I00484g	-2.89290396335411		Ortholog(s) have cell adhesion molecule binding, glucan endo-1,6-beta-glucosidase activity, glucan exo-1,3-beta-glucosidase activity	C1_02990C	XOG1	Exo-1,3-beta-glucanase; 5 glycosyl hydrolase family member; affects sensitivity to chitin and glucan synthesis inhibitors; not required for yeast-to-hypha transition or for virulence in mice; Hap43-induced; Spider biofilm induced	YLR300W	EXG1	Major exo-1,3-beta-glucanase of the cell wall; involved in cell wall beta-glucan assembly; exists as three differentially glycosylated isoenzymes; EXG1 has a paralog, SPR1, that arose from the whole genome duplication
	CAGL0I06182g	-2.84150618383928	PIR2	Pir protein family member, putative cell wall component				YJL159W	HSP150	O-mannosylated heat shock protein; secreted and covalently attached to the cell wall via beta-1,3-glucan and disulfide bridges; required for cell wall stability; induced by heat shock, oxidative stress, and nitrogen limitation; HSP150 has a paralog, PIR3, that arose from the whole genome duplication
	CAGL0F01287g	-2.77620336043602	GAS5	Putative transglycosidase with a predicted role in the elongation of 1,3-beta-glucan	C5_05390C	PGA4	GPI-anchored cell surface protein; beta-1,3-glucanosyltransferase with similarity to the A. fumigatus GEL family; transcript induced in RHE model of oral candidiasis; fluconazol-induced	YOL030W	GAS5	1,3-beta-glucanosyltransferase; has similarity to Gas1p; localizes to the cell wall
	CAGL0F01485g	-2.74518440530592	TIR2	Putative GPI-linked cell wall mannoprotein of the Srp1p/Tip1p family				YOR009W	TIR4	Cell wall mannoprotein; expressed under anaerobic conditions and required for anaerobic growth; transcription is also induced by cold shock; member of the Srp1p/Tip1p family of serine-alanine-rich proteins
	CAGL0G00814g	-2.74049186503539	CHS5	Ortholog(s) have small GTPase binding activity	C2_04140W	CHS5	Putative chitin biosynthesis protein; fungal-specific; repressed upon yeast-to-hypha switch; rat catheter biofilm repressed	YLR330W	CHS5	Component of the exomer complex; the exomer which also contains Csh6p, Bch1p, Bch2p, and Bud7, is involved in the export of select proteins, such as chitin synthase Chs3p, from the Golgi to the plasma membrane; interacts selectively with the activated, GTP-bound form of Arf1p; Chs5p is the only protein with a BRCT domain that is not localized to the nucleus
	CAGL0L00979g	-2.63188065382928		Ortholog(s) have role in ER to Golgi vesicle-mediated transport and endoplasmic reticulum localization	C3_00470W		Ortholog(s) have role in ER to Golgi vesicle-mediated transport and endoplasmic reticulum localization	YIL039W	TED1	GPI-glycan remodelase; conserved phosphoesterase domain-containing protein; acts together with Emp24p/Erv25p in cargo exit from the ER; functional ortholog of mammalian GPI-glycan remodelase PGAP5; deletion confers sensitivity to 4-(N-(S-glutathionylacetyl)amino) phenylarsenoxide (GSAO)
	CAGL0M05841g	-2.61792009529716		Ortholog(s) have alpha-1,2-mannosyltransferase activity, mannosylphosphate transferase activity, role in cell wall mannoprotein biosynthetic process, protein N-linked glycosylation and Golgi apparatus localization	C2_04560W	KTR2	Mannosyltransferase; transcription elevated in chk1, nik1, and sln1 homozygous null mutants; fungal-specific (no human or murine homolog); possibly an essential gene, disruptants not obtained by UAU1 method	YKR061W	KTR2	Mannosyltransferase involved in N-linked protein glycosylation; member of the KRE2/MNT1 mannosyltransferase family; KTR2 has a paralog, YUR1, that arose from the whole genome duplication
	CAGL0M05027g	-2.58497864918708		Ortholog(s) have small GTPase binding activity and role in Golgi to plasma membrane transport, fungal-type cell wall chitin biosynthetic process	C5_03820C	BUD7	Ortholog(s) have small GTPase binding activity and role in Golgi to plasma membrane transport, fungal-type cell wall chitin biosynthetic process	YMR237W	BCH1	Member of the ChAPs family (Chs5p-Arf1p-binding proteins); members include Bch1p, Bch2p, Bud7p, and Chs6p; ChAPs family proteins form the exomer complex with Chs5p to mediate export of specific cargo proteins from the Golgi to the plasma membrane; interacts selectively with the activated, GTP-bound form of Arf1p; may interact with ribosomes; protein abundance increases and forms cytoplasmic foci …
	CAGL0C01727g	-2.52468164014426		Ortholog(s) have UDP-N-acetylglucosamine-dolichyl-phosphate N-acetylglucosaminephosphotransferase activity	C2_07940C	ALG7	Protein involved in cell wall mannan biosynthesis; mutation confers hypersensitivity to tunicamycin; transcript elevated in chk1, nik1, and sln1 homozygous null mutants; possibly essential gene, disruptants not obtained by UAU1 method	YBR243C	ALG7	UDP-N-acetyl-glucosamine-1-P transferase; transfers Glc-Nac-P from UDP-GlcNac to Dol-P in the ER in the first step of the dolichol pathway of protein asparagine-linked glycosylation; inhibited by tunicamycin; human homolog DPAGT1 can complement yeast ALG7 mutant
	CAGL0H07403g	-2.3536307761802	KRE2	Ortholog(s) have alpha-1,2-mannosyltransferase activity	C3_01830C	MNT2	Alpha-1,2-mannosyl transferase; adds 3rd mannose in cell-wall mannoprotein biosynthesis; partially redundant with Mnt1; role in adherence and virulence; expressed in yeast and hyphae; fungal-specific; Hap43-induced; Spider biofilm induced	YDR483W	KRE2	Alpha1,2-mannosyltransferase of the Golgi; involved in protein mannosylation; KRE2 has a paralog, KTR6, that arose from the whole genome duplication
	CAGL0I04532g	-2.30949816280454	MNN2	Alpha-1,2-mannosyltransferase, involved in protein mannosylation in Golgi	CR_05300C	MNN21	Ortholog(s) have alpha-1,2-mannosyltransferase activity, role in cell wall mannoprotein biosynthetic process and Golgi apparatus localization	YBR015C	MNN2	Alpha-1,2-mannosyltransferase; responsible for addition of the first alpha-1,2-linked mannose to form the branches on the mannan backbone of oligosaccharides, localizes to an early Golgi compartment
	CAGL0K06281g	-2.26964058049449		Ortholog(s) have guanylate kinase activity, role in GDP biosynthetic process, GMP metabolic process and biofilm matrix, cytoplasm, nucleus localization	C5_03790W	GUK1	Putative guanylate kinase; identified in extracts from biofilm and planktonic cells; protein level decrease in stationary phase cultures; Hap43p-induced gene	YDR454C	GUK1	Guanylate kinase; converts GMP to GDP; required for growth and mannose outer chain elongation of cell wall N-linked glycoproteins
	CAGL0M11880g	-2.23608233653413		Ortholog(s) have role in GPI anchor biosynthetic process, cellular manganese ion homeostasis and Golgi apparatus, endoplasmic reticulum, fungal-type vacuole membrane localization	C5_02320C		Ortholog(s) have role in GPI anchor biosynthetic process, cellular manganese ion homeostasis and endoplasmic reticulum, fungal-type vacuole membrane localization	YCR044C	PER1	Protein of the endoplasmic reticulum; required for GPI-phospholipase A2 activity that remodels the GPI anchor as a prerequisite for association of GPI-anchored proteins with lipid rafts; functionally complemented by human ortholog PERLD1
	CAGL0G04015g	-2.0596719240596		Ortholog(s) have mannose-ethanolamine phosphotransferase activity	C2_03920C	GPI13	Major facilitator superfamily protein; has phosphodiesterase/nucleotide pyrophosphatase domain; similar to S. cerevisiae Gpi13p, which acts in GPI anchor biosynthesis; Hap43p-induced gene	YLL031C	GPI13	ER membrane localized phosphoryltransferase; adds phosphoethanolamine onto the third mannose residue of the glycosylphosphatidylinositol (GPI) anchor precursor; similar to human PIG-O protein
	CAGL0J05544g	-1.90777077081539		Ortholog(s) have protein binding, bridging activity, role in ascospore wall assembly, endocytosis and cell periphery, mating projection tip localization	C3_01400W	END3	Regulated by Gcn4p; induced in response to amino acid starvation (3-aminotriazole treatment)	YNL084C	END3	EH domain-containing protein involved in endocytosis; actin cytoskeletal organization and cell wall morphogenesis; forms a complex with Sla1p and Pan1p
	CAGL0A04081g	-1.76708368006806		Predicted GPI-linked cell wall protein				YLR194C	YLR194C	Structural constituent of the cell wall; attached to the plasma membrane by a GPI-anchor; expression is upregulated in response to cell wall stress; null mutant is sensitive to the antifungal agent polyhexamethylene biguanide, resistant to zymolyase treatment and has increased chitin deposition
	CAGL0M00220g	-1.73620420776413		Ortholog(s) have dolichyl-phosphate-mannose-protein mannosyltransferase activity	C2_06100W	PMT4	Protein mannosyltransferase; required for WT cell wall composition and virulence in mice; roles in hyphal growth and drug sensitivity; one of 5 family members; Axl2 a substrate; Spider biofilm repressed; Bcr1-repressed in RPMI a/a biofilm	YJR143C	PMT4	Protein O-mannosyltransferase; transfers mannose residues from dolichyl phosphate-D-mannose to protein serine/threonine residues; appears to form homodimers in vivo and does not complex with other Pmt proteins; target for new antifungals
	CAGL0K00979g	-1.70547182632086		Ortholog(s) have role in cellular response to drug, cellular response to neutral pH, cellular response to starvation and filamentous growth of a population of unicellular organisms in response to neutral pH, more	C4_04780W	PMT6	Protein mannosyltransferase; required for virulence in mice, adhesion to endothelium; role in hyphal growth signaling, hygromycin B sensitivity; no major role in cellular PMT activity; Hap4-repressed; Bcr1-repressed in RPMI a/a biofilms	YGR199W	PMT6	Protein O-mannosyltransferase; transfers mannose from dolichyl phosphate-D-mannose to protein serine/threonine residues of secretory proteins; reaction is essential for cell wall rigidity; member of a family of mannosyltransferases
	CAGL0A01452g	-1.69931077260549	CWH41	Putative glucosidase I; glycoside hydrolase; predicted GPI-anchor	C4_06100W	CWH41	Processing alpha glucosidase I, involved in N-linked protein glycosylation and assembly of cell wall beta 1,6 glucan; rat catheter biofilm repressed	YGL027C	CWH41	Processing alpha glucosidase I; ER type II integral membrane N-glycoprotein involved in assembly of cell wall beta 1,6 glucan and asparagine-linked protein glycosylation; also involved in ER protein quality control and sensing of ER stress
	CAGL0M13453g	-1.68410915628385		Ortholog(s) have GPI-anchor transamidase activity and role in attachment of GPI anchor to protein, conidium formation, fungal-type cell wall organization, fungal-type cell wall polysaccharide biosynthetic process, regulation of growth rate	C4_03130W		Putative GPI transamidase component; possibly an essential gene, disruptants not obtained by UAU1 method	YHR188C	GPI16	Subunit of the glycosylphosphatidylinositol transamidase complex; transmembrane protein; adds GPIs to newly synthesized proteins; human PIG-Tp homolog
	CAGL0K12408g	-1.65353589331546		Ortholog(s) have phosphatidylinositol deacylase activity	C1_04190C	BST1	Inositol deacylase involved in attachment of GPI-anchored proteins to cell wall; required for host invasion and immune escape	YFL025C	BST1	GPI inositol deacylase of the endoplasmic reticulum (ER); negatively regulates COPII vesicle formation; prevents production of vesicles with defective subunits; required for proper discrimination between resident ER proteins and Golgi-bound cargo molecules; functional ortholog of human PGAP1, mutation of which is associated with intellectual disability and encephalopathy
	CAGL0I08459g	-1.60842413609808	RHO1	Ortholog(s) have GTP binding, GTPase activity, signal transducer activity	CR_02860W	RHO1	Small GTPase of Rho family; regulates beta-1,3-glucan synthesis activity and binds Gsc1p; essential; expected to be geranylgeranylated by geranylgeranyltransferase type I; plasma membrane-localized	YPR165W	RHO1	GTP-binding protein of the rho subfamily of Ras-like proteins; involved in establishment of cell polarity; regulates protein kinase C (Pkc1p) and the cell wall synthesizing enzyme 1,3-beta-glucan synthase (Fks1p and Gsc2p)
	CAGL0G00858g	-1.54551276440998		Ortholog(s) have transmembrane signaling receptor activity				YLR332W	MID2	O-glycosylated plasma membrane protein; acts as a sensor for cell wall integrity signaling and activates the pathway; interacts with Rom2p, a guanine nucleotide exchange factor for Rho1p, and with cell integrity pathway protein Zeo1p; MID2 has a paralog, MTL1, that arose from the whole genome duplication
	CAGL0B04565g	-1.53568008957537		Ortholog(s) have alpha-1,2-mannosyltransferase activity	C3_01810C	MNT1	Alpha-1,2-mannosyl transferase; predicted type II Golgi membrane protein; adds 2nd mannose during cell-wall mannoprotein biosynthesis; required for wild-type virulence and adherence to epithelial cells; Hap43-induced	YOR099W	KTR1	Alpha-1,2-mannosyltransferase; involved in O- and N-linked protein glycosylation; type II membrane protein; member of the KRE2/MNT1 mannosyltransferase family; relocalizes from vacuole to cytoplasm upon DNA replication stress
	CAGL0G00220g	-1.27269624912657		Ortholog(s) have 1,3-beta-glucanosyltransferase activity, glucan endo-1,3-beta-D-glucosidase activity	C4_02250C	BGL2	Cell wall 1,3-beta-glucosyltransferase; mutant has cell-wall and growth defects, but wild-type 1,3- or 1,6-beta-glucan content; antigenic; virulence role in mouse systemic infection; rat catheter biofilm induced	YGR282C	BGL2	Endo-beta-1,3-glucanase; major protein of the cell wall, involved in cell wall maintenance; involved in incorporation of newly synthesized mannoprotein molecules into the cell wall
	CAGL0E01419g	-1.24871904784173	YPS2	Putative aspartic protease; predicted GPI-anchor; member of a YPS gene cluster that is required for virulence in mice; induced in response to low pH and high temperature				YDR144C	MKC7	GPI-anchored aspartyl protease; member of the yapsin family of proteases involved in cell wall growth and maintenance; shares functions with Yap3p and Kex2p; MKC7 has a paralog, YPS1, that arose from the whole genome duplication
	CAGL0L03520g	-1.24057376008064	BCK1	Ortholog(s) have MAP kinase kinase kinase activity	C7_02990W	BCK1	Ortholog of S. cerevisiae Bck1; MAP kinase kinase kinase of cell integrity pathway; mutant is hypersensitive to caspofungin	YJL095W	BCK1	MAPKKK acting in the protein kinase C signaling pathway; the kinase C signaling pathway controls cell integrity; upon activation by Pkc1p phosphorylates downstream kinases Mkk1p and Mkk2p; MAPKKK is an acronym for mitogen-activated protein (MAP) kinase kinase kinase
	CAGL0L01243g	-1.235981536971		Ortholog(s) have guanosine-diphosphatase activity, uridine-diphosphatase activity	C3_06120C	GDA1	Golgi membrane GDPase, required for wild-type O-mannosylation, not N-glycosylation; required for wild-type hyphal induction, cell wall, and cell surface charge; not required for HeLa cell adherence; functional homolog of S. cerevisiae Gda1p	YEL042W	GDA1	Guanosine diphosphatase located in the Golgi; involved in the transport of GDP-mannose into the Golgi lumen, converting GDP to GMP after mannose is transferred to substrates; null mutants are defective in sporulation and pre-meiotic S phase entry; orthologous to human ENTPD6, a meiosis-associated non-obstructive azoospermia (NOA) related gene identified in GWAS studies
	CAGL0B04389g	-1.21799419592839	CHS3	Putative class IV chitin synthase; mutants display a significantly thickened cell wall mannoprotein layer; mutants are delayed in cell wall formation during protoplast regeneration
	CAGL0M13827g	-1.17265170712495	FKS3	Putative 1,3-beta-d-glucan synthase component				YMR306W	FKS3	Protein involved in spore wall assembly; has similarity to 1,3-beta-D-glucan synthase catalytic subunits Fks1p and Gsc2p; the authentic, non-tagged protein is detected in highly purified mitochondria in high-throughput studies
	CAGL0I04092g	-1.17210286421784		Ortholog(s) have role in ascospore wall assembly and endoplasmic reticulum localization				YGL228W	SHE10	Protein involved in outer spore wall assembly; likely involved directly in dityrosine layer assembly; putative GPI-anchored protein; overexpression causes growth arrest;; SWAT-GFP, seamless-GFP and mCherry fusion proteins localize to the endoplasmic reticulum; SHE10 has a paralog, OSW7/YFR039C, that arose from the whole genome duplication; paralogs are redundant for spore wall dityrosine assembly
	CAGL0C02453g	-1.17039109607557		Ortholog(s) have GTPase activity and role in early endosome to Golgi transport, exocytosis, fungal-type cell wall organization or biogenesis, mitotic cytokinesis, vacuole fusion, non-autophagic				YER031C	YPT31	Rab family GTPase; involved in the exocytic pathway; mediates intra-Golgi traffic or the budding of post-Golgi vesicles from the trans-Golgi; YPT31 has a paralog, YPT32, that arose from the whole genome duplication; localizes to the transitional and late Golgi
	CAGL0C04235g	-1.09060747245746		Ortholog(s) have dolichyl-phosphate-mannose-glycolipid alpha-mannosyltransferase activity and role in GPI anchor biosynthetic process	C1_04280C		Ortholog(s) have dolichyl-phosphate-mannose-glycolipid alpha-mannosyltransferase activity and role in GPI anchor biosynthetic process	YBR004C	GPI18	Functional ortholog of human PIG-V; PIG-V is a mannosyltransferase that transfers the second mannose in glycosylphosphatidylinositol biosynthesis; the authentic, non-tagged protein was localized to mitochondria
	CAGL0J00539g	-1.07458474052331	SLT2	Mitogen-activated protein kinase with a role in cell wall integrity	CR_00120C	MKC1	MAP kinase; role in biofilm formation, contact-induced invasive filamentation, systemic virulence in mouse, cell wall structure/maintenance, caspofungin response; phosphorylated on surface contact, membrane perturbation, or cell wall stress	YHR030C	SLT2	Serine/threonine MAP kinase; coordinates expression of all 19S regulatory particle assembly-chaperones (RACs) to control proteasome abundance; involved in regulating maintenance of cell wall integrity, cell cycle progression, nuclear mRNA retention in heat shock, septum assembly; required for mitophagy, pexophagy; affects recruitment of mitochondria to phagophore assembly site; plays role in adap…
	CAGL0K09548g	-1.05937267507407		Ortholog(s) have alpha-1,2-mannosyltransferase activity, dolichyl-phosphate-mannose-glycolipid alpha-mannosyltransferase activity and role in GPI anchor biosynthetic process, fungal-type cell wall biogenesis, plasmid maintenance	C2_03070C	SMP3	Mannosyltransferase of glycosylphosphatidylinositol (GPI) biosynthesis; catalyzes mannosylation of Man3-GPI precursor; essential for viability; 8-9 transmembrane regions predicted; has HQEXRF motif; functional homolog of S. cerevisiae Smp3p	YOR149C	SMP3	Alpha 1,2-mannosyltransferase; involved in glycosyl phosphatidyl inositol (GPI) biosynthesis; required for addition of the fourth, side branching mannose to the GPI core structure
	CAGL0G00308g	1.03049120229629	SCW4	Putative transglycosidase with a predicted role in the modification of 1,3-beta-glucan				YGR279C	SCW4	Cell wall protein with similarity to glucanases; scw4 scw10 double mutants exhibit defects in mating; SCW4 has a paralog, SCW10, that arose from the whole genome duplication
	CAGL0J06182g	1.06788393036006	SKO1	bZIP domain-containing protein	C1_03770W	SKO1	bZIP transcription factor; involved in cell wall damage response; represses the yeast-to-hypha transition; mutants are caspofungin sensitive; induced by osmotic stress via Hog1; induced by Mnl1 under weak acid stress	YNL167C	SKO1	Basic leucine zipper transcription factor of the ATF/CREB family; forms a complex with Tup1p and Cyc8p to both activate and repress transcription; cytosolic and nuclear protein involved in osmotic and oxidative stress responses
	CAGL0H05621g	1.06899210429789	RLM1	Putative transcription factor with a predicted role in cell wall integrity	C4_01260W	RLM1	Putative transcription factor; required for wild-type resistance to cell wall perturbation, caspofungin treatment; regulates caspofungin induction of PGA13	YPL089C	RLM1	MADS-box transcription factor; component of the protein kinase C-mediated MAP kinase pathway involved in the maintenance of cell integrity; phosphorylated and activated by the MAP-kinase Slt2p; RLM1 has a paralog, SMP1, that arose from the whole genome duplication
	CAGL0H09592g	1.08630654571261		Putative GPI-linked cell wall protein
	CAGL0G01034g	1.13671087959852	FKS1	Putative 1,3-beta-glucan synthase component; functionally redundant with Fks2p; "hot spot" mutations in FKS1 confer resistance to echinocandins				YLR342W	FKS1	Catalytic subunit of 1,3-beta-D-glucan synthase; functionally redundant with alternate catalytic subunit Gsc2p; binds to regulatory subunit Rho1p; involved in cell wall synthesis and maintenance; localizes to sites of cell wall remodeling; FKS1 has a paralog, GSC2, that arose from the whole genome duplication
	CAGL0K03399g	1.16616739667233	YPK2	Ortholog(s) have protein serine/threonine kinase activity, protein serine/threonine kinase inhibitor activity				YMR104C	YPK2	Protein kinase similar to S/T protein kinase Ypk1p; functionally redundant with YPK1 at the genetic level; participates in a signaling pathway required for optimal cell wall integrity; involved in the TORC-dependent phosphorylation of ribosomal proteins Rps6a/b (S6); human homolog SGK2 can complement a ypk1 ypk2 double mutant
	CAGL0A02431g	1.25976982754294	YPS7	Putative aspartic protease; predicted GPI-anchor; expression induced at high temperature	C7_02300W	YPS7	Putative aspartic-type endopeptidase with limited ability to degrade alpha pheromone; mutants show increased sensitivity to alpha pheromone	YDR349C	YPS7	Putative GPI-anchored aspartic protease; member of the yapsin family of proteases involved in cell wall growth and maintenance; located in the cytoplasm and endoplasmic reticulum
	CAGL0L03289g	1.26348378688395		Ortholog(s) have role in fungal-type cell wall biogenesis, fungal-type cell wall organization, mitophagy and cell surface, extracellular region, extrinsic component of mitochondrial inner membrane, fungal-type cell wall localization	C1_13940W	SIM1	Adhesin-like protein; involved in cell wall maintenance, redundant with Sun41; possibly secreted; macrophage-repressed; repressed by Rim101, Cyr1, Ras1; Spider biofilm induced	YKR042W	UTH1	Mitochondrial inner membrane protein; role in mitophagy is disputed; implicated in cell wall biogenesis, the oxidative stress response, life span during starvation, and cell death; SUN family member; UTH1 has a paralog, NCA3, that arose from the whole genome duplication
	CAGL0I10054g	1.28523441082997		Ortholog(s) have glucosidase activity, role in (1->6)-beta-D-glucan biosynthetic process, fungal-type cell wall organization, sphingolipid biosynthetic process and integral component of membrane localization				YGR143W	SKN1	Protein involved in sphingolipid biosynthesis; type II membrane protein; SKN1 has a paralog, KRE6, that arose from the whole genome duplication
	CAGL0M04169g	1.31750054557928	KRE1	Putative cell wall protein with similarity to S. cerevisiae Kre1p; predicted role in cell wall biogenesis and organization; predicted GPI-anchor	CR_03790C	KRE1	Cell wall glycoprotein; beta glucan synthesis; increases glucan content in S. cerevisiae kre1, complements killer toxin sensitivity; caspofungin induced; Spider/rat catheter/flow model biofilm induced; Bcr1-repressed in RPMI a/a biofilms	YNL322C	KRE1	Cell wall glycoprotein involved in beta-glucan assembly; serves as a K1 killer toxin membrane receptor
	CAGL0A04411g	1.33289782716021	SKT5	Ortholog(s) have enzyme activator activity and role in barrier septum assembly, cellular protein localization, fungal-type cell wall chitin biosynthetic process, regulation of fungal-type cell wall beta-glucan biosynthetic process	C3_05700W	CHS4	Activator of Chs3p chitin synthase; required for wild-type wall chitin content, but not for hyphal growth; mutant resistant to Calcofluor white; prenylation and 2 transmembrane segments predicted; functional homolog of S. cerevisiae Chs4p	YBL061C	SKT5	Activator of Chs3p (chitin synthase III) during vegetative growth; recruits Chs3p to the bud neck via interaction with Bni4p; SKT5 has a paralog, SHC1, that arose from the whole genome duplication
	CAGL0L10670g	1.35595821588016		Predicted GPI-linked cell wall protein	C1_00770C	ROT1	Similar to S. cerevisiae Rot1p, which is involved in cell wall 1,6-beta-glucan biosynthesis; has predicted transmembrane region; possibly an essential gene, disruptants not obtained by UAU1 method	YMR200W	ROT1	Molecular chaperone involved in protein folding in ER; mutation causes defects in cell wall synthesis and lysis of autophagic bodies, suppresses tor2 mutations, and is synthetically lethal with kar2-1 and with rot2 mutations; involved in N-linked glycosylation and O-mannosylation; transmembrane helix Ser250 is essential for Rot1p to interact with other membrane components and exert its functional…
	CAGL0B02904g	1.36614484787957	BMT6	Beta mannosyltransferase
	CAGL0L01331g	1.39787307487688	ANP1	Alpha-1,6-mannosyltransferase with a role in protein N-linked glycosylation in Golgi	C2_08570W	ANP1	Putative mannosyltransferase of Golgi; member of Mnn9p family; similar to S. cerevisiae Anp1p; fungal-specific (no human or murine homolog)	YEL036C	ANP1	Subunit of the alpha-1,6 mannosyltransferase complex; type II membrane protein; has a role in retention of glycosyltransferases in the Golgi; involved in osmotic sensitivity and resistance to aminonitrophenyl propanediol
	CAGL0B00616g	1.44685229159603		Ecm33-family protein with a predicted role in cell wall biogenesis and organization; predicted GPI-anchor	C1_13290W		Ortholog(s) have role in ascospore wall assembly and ascospore wall, cytosol, endoplasmic reticulum, mitochondrion, prospore membrane localization	YCL048W	SPS22	Protein of unknown function; SPS22 has a paralog, SPS2, that arose from the whole genome duplication; redundant with Sps2p for the organization of the beta-glucan layer of the spore wall
	CAGL0J05896g	1.46780582824048		Ortholog(s) have mannosyltransferase activity, role in GPI anchor biosynthetic process and integral component of endoplasmic reticulum membrane, mannosyltransferase complex, nuclear envelope localization				YNL158W	PGA1	Essential component of GPI-mannosyltransferase II; complex is responsible for second mannose addition to GPI precursors as a partner of Gpi18p; required for maturation of Gas1p and Pho8p; has synthetic genetic interactions with secretory pathway genes
	CAGL0J03828g	1.51769445991745	MKK1	Ortholog(s) have MAP kinase kinase activity, protein tyrosine kinase activity, structural constituent of cell wall activity	C2_05780C	MKK2	Ortholog of S. cerevisiae Mkk2; MAP kinase kinase involved in signal transduction; macrophage-downregulated; mutants are viable and hypersensitive to caspofungin	YOR231W	MKK1	MAPKK involved in the protein kinase C signaling pathway; involved in control of cell integrity; upon activation by Bck1p phosphorylates downstream target, Slt2p; functionally redundant with Mkk2p; MKK1 has a paralog, MKK2, that arose from the whole genome duplication
	CAGL0B02948g	1.66963324741013	BMT4	Beta mannosyltransferase
	CAGL0E02255g	1.78899510911196		Ortholog(s) have role in fungal-type cell wall organization and extrinsic component of plasma membrane, mitochondrial outer membrane localization				YOL109W	ZEO1	Peripheral membrane protein of the plasma membrane; interacts with Mid2p; regulates the cell integrity pathway mediated by Pkc1p and Slt2p; the authentic protein is detected in a phosphorylated state in highly purified mitochondria
	CAGL0G06072g	1.80587747558472		Ortholog(s) have endoplasmic reticulum, fungal-type vacuole localization	C3_03030C	ECM14	Ortholog(s) have endoplasmic reticulum, fungal-type vacuole localization	YHR132C	ECM14	Putative metalloprotease with similarity to zinc carboxypeptidases; required for normal cell wall assembly
	CAGL0E05126g	1.85874617414368		Ortholog(s) have CAAX-protein geranylgeranyltransferase activity, role in glucan biosynthetic process, protein geranylgeranylation and CAAX-protein geranylgeranyltransferase complex, cytosol, nucleus localization	CR_04910W	CDC43	Beta subunit of heterodimeric protein geranylgeranyltransferase type I; GGTase I enzyme binds zinc, is Mg-dependent; Cdc42p is GGTase I substrate	YGL155W	CDC43	Beta subunit of geranylgeranyltransferase type I; subunit of the Ram2p-Cdc43p heterodimer that catalyzes the geranylgeranylation of the cysteine residue in proteins containing a C-terminal CaaX sequence ending in Leu or Phe; has substrates important for morphogenesis
	CAGL0H10120g	1.86345850277581		Ortholog(s) have glucan endo-1,6-beta-glucosidase activity and role in fungal-type cell wall beta-glucan metabolic process, fungal-type cell wall disassembly involved in conjugation with cellular fusion	C1_14060W		Glucan 1,3-beta-glucosidase; regulated by Nrg1, Tup1 and possibly Tac1; induced by NO and during cell wall regeneration; stationary phase enriched; possibly essential (UAU1 method); F-12/CO2 early biofilm induced; flow biofilm repressed	YBR056W	YBR056W	Putative glycoside hydrolase of the mitochondrial intermembrane space
	CAGL0H09614g	1.8712003512191		Putative GPI-linked cell wall protein				YER011W	TIR1	Cell wall mannoprotein; expression is downregulated at acidic pH and induced by cold shock and anaerobiosis; abundance is increased in cells cultured without shaking; member of the Srp1p/Tip1p family of serine-alanine-rich proteins
	CAGL0K05247g	1.99085652775695		Ortholog(s) have ubiquitin protein ligase binding activity, role in fungal-type cell wall organization, regulation of transcription from RNA polymerase II promoter and cytosol, nucleus localization				YPR030W	CSR2	Nuclear ubiquitin protein ligase binding protein; may regulate utilization of nonfermentable carbon sources and endocytosis of plasma membrane proteins; overproduction suppresses chs5 spa2 lethality at high temp; ubiquitinated by Rsp5p, deubiquitinated by Ubp2p; CSR2 has a paralog, ECM21, that arose from the whole genome duplication
	CAGL0K12980g	2.11811102379457	BMT7	Beta mannosyltransferase
	CAGL0I07249g	2.28345142229744		Putative GTPase-activating protein involved in cell wall and cytoskeleton homeostasis; gene is upregulated in azole-resistant strain				YOR134W	BAG7	Rho GTPase activating protein (RhoGAP); stimulates the intrinsic GTPase activity of Rho1p, which plays a bud growth by regulating actin cytoskeleton organization and cell wall biosynthesis, resulting in the downregulation of Rho1p; structurally and functionally related to Sac7p; BAG7 has a paralog, SAC7, that arose from the whole genome duplication
	CAGL0B00594g	2.32202602787528		Predicted GPI-linked protein				YCL048W-A	YCL048W-A	Putative protein of unknown function; SWAT-GFP and mCherry fusion proteins localize to the cell periphery and vacuole; YCL048W-A has a paralog, YDR524C-B, that arose from the whole genome duplication
	CAGL0F03883g	2.44579153925499	GAS4	Putative glycoside hydrolase of the Gas/Phr family; predicted GPI-anchor				YMR215W	GAS3	Putative 1,3-beta-glucanosyltransferase; has similarity go other GAS family members; low abundance, possibly inactive member of the GAS family of GPI-containing proteins; localizes to the cell wall; mRNA induced during sporulation
	CAGL0H01661g	2.44983280295166		Ecm33-family protein with a predicted role in cell wall biogenesis and organization; predicted GPI-anchor				YDR522C	SPS2	Protein expressed during sporulation; SPS2 has a paralog, SPS22, that arose from the whole genome duplication; redundant with Sps22p for organization of the beta-glucan layer of the spore wall; S. pombe ortholog is a spore wall component
	CAGL0J11462g	2.48250508756196		Predicted GPI-linked cell wall protein	C5_00270W	PGA14	Putative GPI-anchored protein; induced during cell wall regeneration; regulated by Ssn6p	YNL190W	YNL190W	Hydrophilin essential in desiccation-rehydration process; cell wall protein; contains a putative GPI-attachment site
	CAGL0B02882g	2.67134972647007	BMT2	Beta mannosyltransferase; transmembrane domain protein similar to C. albicans WRY family; gene is downregulated in azole-resistant strain
	CAGL0C03872g	2.72420426487234	TIR3	Putative GPI-linked cell wall protein involved in sterol uptake				YIL011W	TIR3	Cell wall mannoprotein; member of Srp1p/Tip1p family of serine-alanine-rich proteins; expressed under anaerobic conditions and required for anaerobic growth; TIR3 has a paralog, TIR2, that arose from the whole genome duplication
	CAGL0H07997g	2.74194393008807	KNH1	Protein involved in cell wall beta 1,6-glucan synthesis, similar to Kre9p,
	CAGL0L05434g	2.8924796867853	SUN4	Ortholog(s) have role in fungal-type cell wall organization or biogenesis, mitochondrion organization and fungal-type cell wall, fungal-type vacuole localization				YJL116C	NCA3	Protein involved in mitochondrion organization; functions with Nca2p to regulate mitochondrial expression of subunits 6 (Atp6p) and 8 (Atp8p) of the Fo-F1 ATP synthase; SWAT-GFP, seamless-GFP and mCherry fusion proteins localize to the vacuole; member of the SUN family; expression induced in cells treated with the mycotoxin patulin; NCA3 has a paralog, UTH1, that arose from the whole genome dupli…
	CAGL0G08602g	2.89620155616948		Ortholog(s) have GTPase regulator activity, role in Ras protein signal transduction, fungal-type cell wall biogenesis, positive regulation of transcription from RNA polymerase II promoter and nucleus localization				YIL119C	RPI1	Transcription factor, allelic differences between S288C and Sigma1278b; mediates fermentation stress tolerance by modulating cell wall integrity; overexpression suppresses heat shock sensitivity of wild-type RAS2 overexpression and also suppresses cell lysis defect of mpk1 mutation; allele from S288c can confer fMAPK pathway independent transcription of FLO11; S288C and Sigma1278b alleles differ …
	CAGL0G05984g	2.99469240521345		Ortholog(s) have role in ascospore wall assembly				YHR139C	SPS100	Protein required for spore wall maturation; expressed during sporulation; may be a component of the spore wall; expression also induced in cells treated with the mycotoxin patulin; SPS100 has a paralog, YGP1, that arose from the whole genome duplication
	CAGL0D00286g	3.15181303629568	BMT1	Beta mannosyltransferase
	CAGL0J06050g	3.15261108672318		Ortholog(s) have role in cell wall assembly and extracellular region localization				YNL160W	YGP1	Cell wall-related secretory glycoprotein; induced by nutrient deprivation-associated growth arrest and upon entry into stationary phase; may be involved in adaptation prior to stationary phase entry; YGP1 has a paralog, SPS100, that arose from the whole genome duplication
	CAGL0H02563g	3.54441087715188		Predicted GPI-linked protein				YMR251W-A	HOR7	Protein of unknown function; overexpression suppresses Ca2+ sensitivity of mutants lacking inositol phosphorylceramide mannosyltransferases Csg1p and Csh1p; transcription is induced under hyperosmotic stress and repressed by alpha factor; HOR7 has a paralog, DDR2, that arose from the whole genome duplication
	CAGL0F03003g	3.90341026006541		Ortholog(s) have osmosensor activity and role in (1->3)-beta-D-glucan biosynthetic process, cellular bud site selection, fungal-type cell wall organization, hyperosmotic response, osmosensory signaling pathway via Sho1 osmosensor				YDR420W	HKR1	Mucin family member that functions as an osmosensor in the HOG pathway; large, highly glycosylated protein that functions redundantly with Msb2p in Sho1p-mediated osmostresss induction of the HOG signaling pathway; cytoplasmic domain interacts with Ahk1p a scaffold protein that prevents cross talk with the Kss1p MAPK of the filamentous growth pathway; mutant displays defects in beta-1,3 glucan sy…
	CAGL0E01595g	3.97718252846192		Putative glycoside hydrolase of the Gas/Phr family; predicted GPI-anchor	C4_00090W	PHR3	Putative beta-1,3-glucanosyltransferase with similarity to the A. fumigatus GEL family; fungal-specific (no human or murine homolog); possibly an essential gene, disruptants not obtained by UAU1 method	YOL132W	GAS4	1,3-beta-glucanosyltransferase; involved with Gas2p in spore wall assembly; has similarity to Gas1p; localizes to the cell wall
	CAGL0F00891g	4.79146601654687		Ortholog(s) have role in ascospore wall assembly and ascospore wall, ascus lipid particle, cytoplasm, prospore membrane localization				YOL047C	LDS2	Protein Involved in spore wall assembly; localizes to lipid droplets found on or outside of the prospore membrane; shares similarity with Lds1p and Rrt8p, and a strain mutant for all 3 genes exhibits reduced dityrosine fluorescence relative to the single mutants; green fluorescent protein (GFP)-fusion protein localizes to the cytoplasm in a punctate pattern
	CAGL0B02926g	5.16840053283222	BMT3	Beta mannosyltransferase
RNA metabolism and translation	CAGL0E02123g	-4.29554446397425		Ortholog(s) have mitochondrial large ribosomal subunit localization	C1_05400C		Ortholog(s) have mitochondrial large ribosomal subunit localization	YOL114C	YOL114C	Protein similar to the human peptidyl-tRNA hydrolase gene ICT1; associates with mitochondrial large subunit; may function in translation termination; YOL114C is not an essential gene
	CAGL0F01529g	-4.14331600168257		Ortholog(s) have role in mitochondrial translation and cytosol, mitochondrion localization	C1_13060C		Ortholog(s) have role in mitochondrial translation and cytosol, mitochondrion localization	YLR069C	MEF1	Mitochondrial elongation factor involved in translational elongation
	CAGL0L03652g	-3.92438529547825		Ortholog(s) have role in mitochondrial genome maintenance, regulation of mitochondrial membrane potential and cytosol, mitochondrion localization	C1_07000W	MEF2	Putative mitochondrial translation elongation factor; caspofungin induced	YJL102W	MEF2	Mitochondrial elongation factor involved in translational elongation
	CAGL0H08602g	-3.89272536750916		Has domain(s) with predicted ATP binding, aminoacyl-tRNA ligase activity, magnesium ion binding, phenylalanine-tRNA ligase activity, tRNA binding activity and role in phenylalanyl-tRNA aminoacylation, tRNA aminoacylation, tRNA processing
	CAGL0L07392g	-3.81286659930951		Ortholog(s) have serine-type endopeptidase activity, role in mitochondrial tRNA threonylcarbamoyladenosine modification, tRNA threonylcarbamoyladenosine modification and mitochondrion localization	C4_00810C		Ortholog(s) have serine-type endopeptidase activity, role in mitochondrial tRNA threonylcarbamoyladenosine modification, tRNA threonylcarbamoyladenosine modification and mitochondrion localization	YDL104C	QRI7	Protein involved in threonylcarbamoyl adenosine biosynthesis; Sua5p and Qri7p are necessary and sufficient for RNA t6A modification in vitro; highly conserved mitochondrial protein; essential for t6A modification of mitochondrial tRNAs that decode ANN codons; similar to Kae1p and E. coli YgjD, both of which are also required for tRNA t6A modification; when directed to the cytoplasm, complements t…
	CAGL0L12606g	-3.80934911465649		Ortholog(s) have role in mitochondrial translation and cytosol, mitochondrion localization	CR_03400W		Protein similar to isoleucyl-tRNA synthetase; isoleucyl-tRNA synthetase is the target of drugs including the cyclic beta-amino acid icofungipen/PLD-118/BAY-10-8888 and mupirocin	YPL040C	ISM1	Mitochondrial isoleucyl-tRNA synthetase; null mutant is deficient in respiratory growth; human homolog IARS2 implicated in mitochondrial diseases, can partially complement yeast null mutant
	CAGL0F05731g	-3.79403433221833		Ortholog(s) have G-protein beta/gamma-subunit complex binding activity, role in positive regulation of transcription from RNA polymerase II promoter by pheromones, protein folding and cytosol, nucleus localization				YDR183W	PLP1	Protein that interacts with CCT (chaperonin containing TCP-1) complex; has a role in actin and tubulin folding; has weak similarity to phosducins, which are G-protein regulators
	CAGL0A03630g	-3.79185856696079		Ortholog(s) have chromatin insulator sequence binding, transcription factor activity, core RNA polymerase III binding activity and role in transcription initiation from RNA polymerase III promoter
	CAGL0E04400g	-3.78059895193225		Ortholog(s) have serine-tRNA ligase activity, role in mitochondrial seryl-tRNA aminoacylation, spore germination and mitochondrion localization	C6_00390W		Ortholog(s) have serine-tRNA ligase activity, role in mitochondrial seryl-tRNA aminoacylation, spore germination and mitochondrion localization	YHR011W	DIA4	Probable mitochondrial seryl-tRNA synthetase; mutant displays increased invasive and pseudohyphal growth
	CAGL0I08723g	-3.6458012402448		Ortholog(s) have methionine-tRNA ligase activity, role in methionyl-tRNA aminoacylation and mitochondrion localization	C5_04650C	MSM1	Mitochondrial methionyl-tRNA synthetase (MetRS); functionally complements methionine auxotrophy of an E. coli MetRS mutant; transcript regulated by Nrg1; flow model biofilm induced	YGR171C	MSM1	Mitochondrial methionyl-tRNA synthetase (MetRS); functions as a monomer in mitochondrial protein synthesis; functions similarly to cytoplasmic MetRS although the cytoplasmic form contains a zinc-binding domain not found in Msm1p
	CAGL0A04565g	-3.44835383819617	SWI4	Has domain(s) with predicted DNA binding, transcription factor activity, sequence-specific DNA binding activity and role in regulation of transcription, DNA-templated
	CAGL0H01023g	-3.44226129397233		Ortholog(s) have RNA-DNA hybrid ribonuclease activity, role in RNA catabolic process and nucleus, ribonuclease H2 complex localization	C2_09180W		Putative ribonuclease H2 subunit; required for RNase H2 activity; repressed in Spider biofilms by Bcr1, Tec1, Brg1, Rob1	YDR279W	RNH202	Ribonuclease H2 subunit; required for RNase H2 activity; role in ribonucleotide excision repair; related to human AGS2 that causes Aicardi-Goutieres syndrome
	CAGL0H02717g	-3.38325905197482		Ortholog(s) have pseudouridylate synthase activity, role in pseudouridine synthesis, rRNA modification and mitochondrion localization	C4_06950W		Predicted pseudouridine synthase; Spider biofilm induced	YLR165C	PUS5	Pseudouridine synthase; catalyzes only the formation of pseudouridine (Psi)-2819 in mitochondrial 21S rRNA; not essential for viability
	CAGL0I05104g	-3.36088849894068		Ortholog(s) have mitochondrion localization	CR_01480W	PRS	Putative prolyl-tRNA synthetase; monofunctional Class II synthetase; gene is constitutively expressed	YER087W	AIM10	Protein with similarity to tRNA synthetases; non-tagged protein is detected in purified mitochondria; null mutant is viable and displays elevated frequency of mitochondrial genome loss
	CAGL0J10208g	-3.28867803389267		Ortholog(s) have RNA-DNA hybrid ribonuclease activity, role in DNA replication, removal of RNA primer, ribonucleotide excision repair and nucleus, ribonuclease H2 complex localization	C7_01630W	RNH35	Putative ribonuclease H2 catalytic subunit; flucytosine induced; Spider biofilm repressed	YNL072W	RNH201	Ribonuclease H2 catalytic subunit; removes RNA primers during Okazaki fragment synthesis and errant ribonucleotides misincorporated during DNA replication; role in ribonucleotide excision repair; homolog of RNAse HI; related to human AGS4 which causes Aicardi-Goutieres syndrome
	CAGL0M13585g	-3.28062018353215		Ortholog(s) have glutaminyl-tRNA synthase (glutamine-hydrolyzing) activity and role in endoplasmic reticulum organization, glutaminyl-tRNAGln biosynthesis via transamidation	C5_04710W		Ortholog(s) have glutaminyl-tRNA synthase (glutamine-hydrolyzing) activity and role in endoplasmic reticulum organization, glutaminyl-tRNAGln biosynthesis via transamidation	YMR293C	HER2	Subunit of the trimeric GatFAB AmidoTransferase(AdT) complex; involved in the formation of Q-tRNAQ; required for remodeling of ER caused by Hmg2p overexpression; similar to bacterial GatA glutamyl-tRNA amidotransferase
	CAGL0J03014g	-3.27714453089158		Ortholog(s) have role in regulation of transcription, DNA-templated and cytoplasm, nucleus localization				YER064C	VHR2	Non-essential nuclear protein; null mutation has global effects on transcription; VHR2 has a paralog, VHR1, that arose from the whole genome duplication; relative distribution to the nucleus increases upon DNA replication stress
	CAGL0I09548g	-3.25147205080927		Ortholog(s) have structural constituent of ribosome activity and mitochondrial small ribosomal subunit localization	C6_02370C		Ortholog(s) have structural constituent of ribosome activity and mitochondrial small ribosomal subunit localization	YGL129C	RSM23	Mitochondrial ribosomal protein of the small subunit; has similarity to mammalian apoptosis mediator proteins; null mutation prevents induction of apoptosis by overproduction of metacaspase Mca1p
	CAGL0M08624g	-3.22519376338311		Ortholog(s) have tryptophan-tRNA ligase activity, role in mitochondrial tryptophanyl-tRNA aminoacylation and mitochondrion localization	C5_02770W	MSW1	Protein similar to S. cerevisiae Msw1p, which is mitochondrial tryptophanyl-tRNA synthetase; Hap43p-repressed gene; likely to be essential for growth, based on an insertional mutagenesis strategy	YDR268W	MSW1	Mitochondrial tryptophanyl-tRNA synthetase
	CAGL0D03542g	-3.21150925134536		Ortholog(s) have threonine-tRNA ligase activity, role in mitochondrial threonyl-tRNA aminoacylation and mitochondrion localization	C1_02930C	MST1	Ortholog(s) have role in mitochondrial threonyl-tRNA aminoacylation and mitochondrion localization	YKL194C	MST1	Mitochondrial threonyl-tRNA synthetase; aminoacylates both the canonical threonine tRNA tT(UGU)Q1 and the unusual threonine tRNA tT(UAG)Q2 in vitro; lacks a typical editing domain, but has pre-transfer editing activity stimulated by the unusual tRNA-Thr
	CAGL0K01265g	-3.09249932178529		Ortholog(s) have role in cellular response to biotic stimulus, cellular response to starvation and filamentous growth of a population of unicellular organisms in response to biotic stimulus, more	C1_11130W	FGR16	Protein lacking an ortholog in S. cerevisiae; transposon mutation affects filamentous growth; fluconazole-downregulated	YGR075C	PRP38	Unique component of the U4/U6.U5 tri-snRNP particle; tri-snRNP is required for conformational changes which result in the catalytic activation of the spliceosome; dispensable for spliceosome assembly
	CAGL0K12474g	-3.06877752545186		Ortholog(s) have role in regulation of transcription from RNA polymerase II promoter and CCR4-NOT complex, cytosol, nucleus localization	C1_08430W	CAF16	ABC family protein, predicted not to be a transporter; Hap43, caspofungin repressed; rat catheter and Spider biofilm repressed	YFL028C	CAF16	Part of evolutionarily-conserved CCR4-NOT regulatory complex; contains single ABC-type ATPase domain but no transmembrane domain; interacts with several subunits of Mediator
	CAGL0I02860g	-3.05420374330457		Ortholog(s) have tRNA binding activity, role in tRNA export from nucleus and cytoplasm, nuclear pore localization	CR_02250C	CEX1	Ortholog(s) have tRNA binding activity, role in tRNA export from nucleus and cytoplasm, nuclear pore localization	YOR112W	CEX1	Component of nuclear aminoacylation-dependent tRNA export pathway; cytoplasmic; interacts with nuclear pore component Nup116p; copurifies with tRNA export receptors Los1p and Msn5p, as well as eIF-1a; required for activation of RAN GTPase Gsp1p and dissociation of receptor-tRNA-Gsp1p export complex; recruits Rna1p from cytoplasm to NPC, facilitates Rna1p activation of Gsp1p GTPase activity by ena…
	CAGL0M00286g	-3.02075379389078	HIR3	Ortholog(s) have DNA binding, nucleosome binding, transcription corepressor activity	C3_07680W		Putative nucleosome assembly protein; homozygous transposon insertion causes decreased colony wrinkling under filamentous growth-inducing conditions, but does not block true hyphal formation in liquid media	YJR140C	HIR3	Subunit of the HIR complex; a nucleosome assembly complex involved in regulation of histone gene transcription; involved in position-dependent gene silencing and nucleosome reassembly; ortholog of human CABIN1 protein
	CAGL0D04158g	-3.01922815040313		Ortholog(s) have structural constituent of ribosome activity and mitochondrial small ribosomal subunit localization	C1_08920W		Ortholog(s) have structural constituent of ribosome activity and mitochondrial small ribosomal subunit localization	YIL093C	RSM25	Mitochondrial ribosomal protein of the small subunit
	CAGL0H05907g	-3.01721666812796		Ortholog(s) have aspartate-tRNA ligase activity, role in mitochondrial aspartyl-tRNA aminoacylation and mitochondrion localization	C1_04030W		Ortholog(s) have aspartate-tRNA ligase activity, role in mitochondrial aspartyl-tRNA aminoacylation and mitochondrion localization	YPL104W	MSD1	Mitochondrial aspartyl-tRNA synthetase; required for acylation of aspartyl-tRNA; yeast and bacterial aspartyl-, asparaginyl-, and lysyl-tRNA synthetases contain regions with high sequence similarity, suggesting a common ancestral gene
	CAGL0L09889g	-2.99211919943114		Ortholog(s) have poly(A)-specific ribonuclease activity, role in nuclear-transcribed mRNA poly(A) tail shortening, postreplication repair and PAN complex, cytosol, nucleus localization	C5_05170W	PAN3	Ortholog(s) have poly(A)-specific ribonuclease activity, role in nuclear-transcribed mRNA poly(A) tail shortening, postreplication repair and PAN complex, cytosol, nucleus localization	YKL025C	PAN3	Essential subunit of the Pan2p-Pan3p poly(A)-ribonuclease complex; poly (A) mRNA binding subunit which recruits mRNA to the complex; the Pan2p-Pan3p complex controls poly(A) tail length and regulates the stoichiometry and activity of postreplication repair complexes
	CAGL0G07249g	-2.95183830015298		Ortholog(s) have RNA polymerase II regulatory region sequence-specific DNA binding, transcriptional repressor activity, RNA polymerase II transcription factor binding activity	C7_00970C	YOX1	Putative homeodomain-containing transcription factor; transcriptional repressor; periodic mRNA expression, peak at cell-cycle G1/S phase	YML027W	YOX1	Homeobox transcriptional repressor; binds to Mcm1p and to early cell cycle boxes (ECBs) in the promoters of cell cycle-regulated genes expressed in M/G1 phase; expression is cell cycle-regulated; phosphorylated by Cdc28p; relocalizes from nucleus to cytoplasm upon DNA replication stress; YOX1 has a paralog, YHP1, that arose from the whole genome duplication
	CAGL0L06732g	-2.94569233331466		Ortholog(s) have structural constituent of ribosome activity, role in aerobic respiration and mitochondrial small ribosomal subunit localization	C1_12340C	MRPS9	Mitochondrial ribosomal protein S9; has N-terminal mitochondrial targeting signal and an S9 consensus motif; overexpression in S. cerevisiae causes respiratory defect that is reversible upon cessation of C. albicans gene expression	YBR146W	MRPS9	Mitochondrial ribosomal protein of the small subunit
	CAGL0H05049g	-2.90649512484244		Ortholog(s) have leucine-tRNA ligase activity, mRNA binding activity, role in Group I intron splicing, leucyl-tRNA aminoacylation, mitochondrial translation and mitochondrion localization	C6_03450C	NAM2	Mitochondrial leucyl-tRNA synthetase	YLR382C	NAM2	Mitochondrial leucyl-tRNA synthetase; also has direct role in splicing of several mitochondrial group I introns; indirectly required for mitochondrial genome maintenance; human homolog LARS2 can complement yeast null mutant, and is implicated in Perrault syndrome
	CAGL0A01980g	-2.90241730169685		Ortholog(s) have GTPase activity, tRNA binding, translation initiation factor activity, role in mitochondrial translation and cell periphery, mitochondrion, nucleus localization	C7_02940C	IFM1	Putative mitochondrial translation initiation factor; transcript regulated by Nrg1, Mig1, and Tup1	YOL023W	IFM1	Mitochondrial translation initiation factor 2
	CAGL0E05060g	-2.89587500816494	NUT1	Ortholog(s) have role in regulation of transcription from RNA polymerase II promoter, transcription from RNA polymerase II promoter and mediator complex, mitochondrion localization	CR_04950W	MED5	RNA polymerase II mediator complex subunit; transcription positively regulated by Tbf1p	YGL151W	NUT1	Component of the RNA polymerase II mediator complex; mediator is required for transcriptional activation and also has a role in basal transcription
	CAGL0L04620g	-2.80416511756985		Ortholog(s) have RNA polymerase II core promoter sequence-specific DNA binding activity, role in transcription from RNA polymerase II promoter and core mediator complex localization	C2_07500C	MED4	RNA polymerase II core mediator complex subunit	YOR174W	MED4	Subunit of the RNA polymerase II mediator complex; associates with core polymerase subunits to form the RNA polymerase II holoenzyme; essential for transcriptional regulation
	CAGL0K07117g	-2.80351073645629		Ortholog(s) have mRNA 3'-UTR AU-rich region binding activity, role in 3'-UTR-mediated mRNA stabilization, negative regulation of MAPK cascade, telomere maintenance and cytosol, nucleus localization	C6_03940C	PBP2	Putative RNA binding protein; transcript regulated by Nrg1, Mig1, and Tup1	YBR233W	PBP2	RNA binding protein; has similarity to mammalian heterogeneous nuclear RNP K protein, involved in the regulation of telomere position effect and telomere length; relative distribution to the nucleus increases upon DNA replication stress
	CAGL0A01760g	-2.79951515080948		Ortholog(s) have arginine-tRNA ligase activity, role in arginyl-tRNA aminoacylation and mitochondrion localization	C1_01530C		Putative tRNA-Arg synthetase; essential; genes encoding ribosomal subunits, translation factors, and tRNA synthetases are downregulated upon phagocytosis by murine macrophage; downregulated by growth in the mouse cecum	YDR341C	YDR341C	Arginyl-tRNA synthetase; the authentic, non-tagged protein is detected in highly purified mitochondria in high-throughput studies; YDR341C has a paralog, MSR1, that arose from the whole genome duplication
	CAGL0M06391g	-2.7837837404397		Ortholog(s) have ribosome binding activity	C3_06050C		Ortholog(s) have ribosome binding activity	YBR185C	MBA1	Membrane-associated mitochondrial ribosome receptor; forms a complex with Mdm38p that may facilitate recruitment of mRNA-specific translational activators to ribosomes; possible role in protein export from the matrix to inner membrane
	CAGL0G09581g	-2.76090748681664		Ortholog(s) have GTPase activity, translation elongation factor activity, role in mitochondrial translational elongation and mitochondrion localization	C1_00590W	TUF1	Translation elongation factor TU; macrophage/pseudohyphal-induced; repressed upon phagocytosis by murine macrophage; levels decrease in stationary phase cells; Spider biofilm repressed	YOR187W	TUF1	Mitochondrial translation elongation factor Tu (EF-Tu); involved in fundamental pathway of mtDNA homeostasis; comprises both GTPase and guanine nucleotide exchange factor activities, while these activities are found in separate proteins in S. pombe and humans; rare mutations in human mitochondrial elongation factor Tu (EFTu) associated with severe lactic acidosis, rapidly progressive fatal enceph…
	CAGL0B04037g	-2.68010974731589		Ortholog(s) have RNA polymerase II core binding, peptidyl-prolyl cis-trans isomerase activity	C1_04410C	ESS1	Prolyl isomerase (parvulin class); essential; involved in yeast-hyphal switching, Cph1p pathway; has inflexible linker between WW and isomerase domains, unlike human homolog; functional homolog of S. cerevisiae Ess1p	YJR017C	ESS1	Peptidylprolyl-cis/trans-isomerase (PPIase); specific for phosphorylated S/T residues N-terminal to proline; regulates phosphorylation of RNAPII large subunit (Rpo21p) C-terminal domain (CTD) at Ser7; associates with phospho-Ser5 form of RNAPII in vivo; present along entire coding length of genes; represses initiation of CUTs; required for efficient termination of mRNA transcription, trimethylati…
	CAGL0J05654g	-2.66604904081436		Ortholog(s) have DNA binding, mRNA binding activity	C2_04870C		Putative THO complex subunit; possibly an essential gene, disruptants not obtained by UAU1 method; protein newly produced during adaptation to the serum	YNL139C	THO2	Subunit of the THO complex; THO is required for efficient transcription elongation and involved in transcriptional elongation-associated recombination; required for LacZ RNA expression from certain plasmids
	CAGL0J06930g	-2.66452180168627		Ortholog(s) have structural constituent of ribosome activity, role in mitochondrial translational initiation and mitochondrial small ribosomal subunit localization	C2_04790C		Ortholog(s) have structural constituent of ribosome activity, role in mitochondrial translational initiation and mitochondrial small ribosomal subunit localization	YPL118W	MRP51	Mitochondrial ribosomal protein of the small subunit; MRP51 exhibits genetic interactions with mutations in the COX2 and COX3 mRNA 5'-untranslated leader sequences
	CAGL0E03960g	-2.66226666252093		Ortholog(s) have eukaryotic initiation factor 4G binding, mRNA binding activity, role in negative regulation of translation in response to stress and P-body, cytoplasmic stress granule, nucleolus localization	C3_04090W	SBP1	Similar to RNA binding proteins; downregulated upon adherence to polystyrene; stationary-phase enriched protein	YHL034C	SBP1	Protein that binds eIF4G and has a role in repression of translation; has an RGG motif; found in cytoplasmic P bodies; binds to mRNAs under glucose starvation stress, most often in the 5' UTR; found associated with small nucleolar RNAs snR10 and snR11; SBP1 has a paralog, RNP1, that arose from the whole genome duplication
	CAGL0F08701g	-2.65685889201903		Ortholog(s) have second spliceosomal transesterification activity and role in generation of catalytic spliceosome for second transesterification step, nuclear retention of unspliced pre-mRNA at the site of transcription	C2_00200W		snRNP U5 splicing factor component; involved in positioning the 3' splice site during the 2nd catalytic step of splicing; Spider biofilm induced	YGR006W	PRP18	Splicing factor and component of snRNP U5; factor involved in the positioning of the 3' splice site during the second catalytic step of splicing; interacts with Slu7p
	CAGL0E02871g	-2.63257849036574		Ortholog(s) have methionyl-tRNA formyltransferase activity, role in conversion of methionyl-tRNA to N-formyl-methionyl-tRNA and mitochondrion localization	C4_06070C	FMT1	Putative methionyl-tRNA transformylase; induced upon adherence to polystyrene	YBL013W	FMT1	Methionyl-tRNA formyltransferase; catalyzes the formylation of initiator Met-tRNA in mitochondria; potential Cdc28p substrate
	CAGL0G01881g	-2.62765850564843		Ortholog(s) have structural constituent of ribosome activity and mitochondrial large ribosomal subunit localization	C1_11880W		Ortholog(s) have structural constituent of ribosome activity and mitochondrial large ribosomal subunit localization	YPR100W	MRPL51	Mitochondrial ribosomal protein of the large subunit
	CAGL0H03883g	-2.61981599360287		Has domain(s) with predicted structural constituent of ribosome activity, role in translation and ribosome localization
	CAGL0I01804g	-2.60562607204225		Ortholog(s) have structural constituent of ribosome activity and mitochondrial large ribosomal subunit, nucleus localization	CR_00480W	MRPL6	Putative mitochondrial ribosomal protein	YHR147C	MRPL6	Mitochondrial ribosomal protein of the large subunit
	CAGL0D03278g	-2.60376602769175		Ortholog(s) have role in chaperone-mediated protein complex assembly, nuclear-transcribed mRNA catabolic process, non-stop decay, proteasome assembly and intracellular localization	C1_12370W		Chaperone component; involved in assembly of alpha subunits into the 20S proteasome; flow model biofilm induced	YLR021W	IRC25	Component of a heterodimeric Poc4p-Irc25p chaperone; involved in assembly of alpha subunits into the 20S proteasome; may regulate formation of proteasome isoforms with alternative subunits under different conditions; upregulates proteasome assembly in response to the unfolded protein response activated by mistargeting of proteins (UPRam)
	CAGL0D04136g	-2.60091039492153		Has domain(s) with predicted RNA polymerase II transcription cofactor activity, role in regulation of transcription from RNA polymerase II promoter and mediator complex localization
	CAGL0M09603g	-2.58629696345902		Ortholog(s) have structural constituent of ribosome activity and mitochondrial small ribosomal subunit localization	C2_02270C		Ortholog(s) have structural constituent of ribosome activity and mitochondrial small ribosomal subunit localization	YMR158W	MRPS8	Mitochondrial ribosomal protein of the small subunit
	CAGL0D05412g	-2.58580892450364		Ortholog(s) have structural constituent of ribosome activity and mitochondrial small ribosomal subunit localization	C1_10470W		Mitochondrial ribosomal protein of the small subunit; Spider biofilm repressed	YBR251W	MRPS5	Mitochondrial ribosomal protein of the small subunit
	CAGL0H07029g	-2.58022227495716		Ortholog(s) have structural constituent of ribosome activity and mitochondrial large ribosomal subunit localization	C2_03560C		Ortholog(s) have structural constituent of ribosome activity and mitochondrial large ribosomal subunit localization	YDR322W	MRPL35	Mitochondrial ribosomal protein of the large subunit
	CAGL0G07447g	-2.57184765685514		Ortholog(s) have mitochondrion localization				YPL168W	YPL168W	Protein that associates with mitochondrial ribosome; green fluorescent protein (GFP)-fusion protein localizes to the mitochondrion; expression may be cell cycle-regulated
	CAGL0G05511g	-2.56627818018484		Ortholog(s) have role in mRNA destabilization, regulation of cell size and cytoplasm localization				YDL224C	WHI4	Putative RNA binding protein; regulates the cell size requirement for passage through Start and commitment to cell division; WHI4 has a paralog, WHI3, that arose from the whole genome duplication
	CAGL0E01111g	-2.53570142521169		Ortholog(s) have role in actin filament-based process, mRNA 3'-end processing, mRNA export from nucleus, mitotic nuclear division and nuclear retention of pre-mRNA at the site of transcription, more	C2_02350C	SAC3	Putative nuclear pore-associated protein, required for small ribosomal subunit biogenesis; possibly an essential gene, disruptants not obtained by UAU1 method	YDR159W	SAC3	mRNA export factor; required for biogenesis of the small ribosomal subunit; component of TREX-2 complex (Sac3p-Thp1p-Sus1p-Cdc31p) involved in transcription elongation and mRNA export from the nucleus; involved in post-transcriptional tethering of active genes to the nuclear periphery and to non-nascent mRNP; similar to the human germinal center-associated nuclear protein (GANP)
	CAGL0F01331g	-2.52806760786257		Ortholog(s) have role in mitochondrial RNA 5'-end processing and mitochondrial envelope localization	C1_11070W	PET127	Protein with a predicted role in 5'-end processing of mitochondrial RNAs; ortholog of S. cerevisiae Pet127; Hap43-induced; rat catheter and Spider biofilm induced	YOR017W	PET127	Protein with a role in 5'-end processing of mitochondrial RNAs; located in the mitochondrial membrane
	CAGL0K10912g	-2.5086672615508		Ortholog(s) have structural constituent of ribosome activity and mitochondrial large ribosomal subunit localization	C2_03950W		Putative ribosomal protein, large subunit, mitochondrial precursor; repressed by prostaglandins; Spider biofilm repressed	YMR193W	MRPL24	Mitochondrial ribosomal protein of the large subunit; two mitochondrial ribosomal proteins, YmL14 and YmL24, have been assigned to the same gene
	CAGL0C02431g	-2.47916877807173		Ortholog(s) have role in mRNA polyadenylation and cellular bud neck localization				YER032W	FIR1	Protein involved in 3' mRNA processing; interacts with Ref2p; APCC(Cdh1) substrate; potential Cdc28p substrate
	CAGL0F02695g	-2.43679039750341		Ortholog(s) have structural constituent of ribosome activity, role in mitochondrial translation and mitochondrial large ribosomal subunit localization	C1_01600W	MRP20	Component of mitochondrial ribosome; decreased expression in hyphae compared to yeast-form cells	YDR405W	MRP20	Mitochondrial ribosomal protein of the large subunit
	CAGL0A02860g	-2.42208743019791		Ortholog(s) have 5'-3' exonuclease activity, role in deadenylation-dependent decapping of nuclear-transcribed mRNA and cytoplasm localization	CR_05160C		S. cerevisiae ortholog YDR370C/DXO1 has decapping and 5&#8242;-3&#8242; exoRNase activity; decreased transcription is observed upon fluphenazine treatment or in an azole-resistant strain that overexpresses CDR1 and CDR2	YDR370C	DXO1	mRNA 5'-end-capping quality-control protein; has distributive, 5'-3' exoRNase activity; similar to Rai1p;
	CAGL0K02717g	-2.41441775765773		Ortholog(s) have structural constituent of ribosome activity and mitochondrial small ribosomal subunit localization	C6_03730C		Ortholog(s) have structural constituent of ribosome activity and mitochondrial small ribosomal subunit localization	YHL004W	MRP4	Mitochondrial ribosomal protein of the small subunit
	CAGL0M11236g	-2.37539547570129		Ortholog(s) have structural constituent of ribosome activity and mitochondrial large ribosomal subunit localization	CR_05150W		Ortholog(s) have structural constituent of ribosome activity and mitochondrial large ribosomal subunit localization	YMR225C	MRPL44	Mitochondrial ribosomal protein of the large subunit; protein abundance increases in response to DNA replication stress
	CAGL0K08866g	-2.37209492404408		Putative non-ATPase regulatory subunit of 26S proteasome; gene is upregulated in azole-resistant strain	C5_02030W	RPN8	Putative regulatory subunit of the 26S proteasome; mutation confers hypersensitivity to amphotericin B; regulated by Mig1, Gcn2 and Gcn4; Spider biofilm repressed	YOR261C	RPN8	Essential non-ATPase regulatory subunit of the 26S proteasome; has similarity to the human p40 proteasomal subunit and to another S. cerevisiae regulatory subunit, Rpn11p
	CAGL0J02992g	-2.34531488640385		Ortholog(s) have RNA binding, chromatin binding, double-stranded DNA binding activity, role in poly(A)+ mRNA export from nucleus, ribonucleoprotein complex assembly, transcription, DNA-templated and nucleus localization	C2_09040W		Putative nuclear RNA-binding protein; Spider biofilm repressed	YER063W	THO1	Conserved nuclear RNA-binding protein; specifically binds to transcribed chromatin in a THO- and RNA-dependent manner, genetically interacts with shuttling hnRNP NAB2; overproduction suppresses transcriptional defect caused by hpr1 mutation
	CAGL0K03531g	-2.32081676662725		Ortholog(s) have TFIIH-class transcription factor binding, transcription factor activity, TFIIH-class transcription factor recruiting activity	C7_01290W	MED11	Subunit of the RNA polymerase II mediator complex	YMR112C	MED11	Subunit of the RNA polymerase II mediator complex; associates with core polymerase subunits to form the RNA polymerase II holoenzyme; essential protein
	CAGL0M00572g	-2.31636078268105		Ortholog(s) have protein-lysine N-methyltransferase activity, role in peptidyl-lysine trimethylation and cytoplasm localization	C2_00620C		Ortholog(s) have protein-lysine N-methyltransferase activity, role in peptidyl-lysine trimethylation and cytoplasm localization	YJR129C	EFM3	S-adenosylmethionine-dependent methyltransferase; seven-beta-strand lysine methyltransferase which trimethylates translation elongation factor EF2 (Eft1p and Eft2p) at lysine 509; green fluorescent protein (GFP)-fusion protein localizes to the cytoplasm; ortholog of human gene FAM86A
	CAGL0H05775g	-2.28804822972268		Ortholog(s) have misfolded RNA binding, tyrosine-tRNA ligase activity, role in Group I intron splicing, RNA folding, mitochondrial tyrosyl-tRNA aminoacylation and mitochondrion localization	C6_01050W		Probable mitochondrial tyrosyl-tRNA synthetase, based on conservation in other fungi	YPL097W	MSY1	Mitochondrial tyrosyl-tRNA synthetase
	CAGL0L03542g	-2.2757348391886		Ortholog(s) have structural constituent of ribosome activity and mitochondrial large ribosomal subunit localization	C7_03000C		Ortholog(s) have structural constituent of ribosome activity and mitochondrial large ribosomal subunit localization	YJL096W	MRPL49	Mitochondrial ribosomal protein of the large subunit
	CAGL0K01243g	-2.26058507443499		Ortholog(s) have structural constituent of ribosome activity and mitochondrial large ribosomal subunit localization	CR_10830C		Mitochondrial ribosomal protein of the large subunit; Spider biofilm repressed	YGR076C	MRPL25	Mitochondrial ribosomal protein of the large subunit; mutation confers increased replicative lifespan
	CAGL0J07524g	-2.25061612936684		Ortholog(s) have RNA polymerase II activating transcription factor binding activity	C7_03320C	MED16	Putative RNA polymerase II mediator complex subunit; induced by nitric oxide	YNL236W	SIN4	Subunit of the RNA polymerase II mediator complex; associates with core polymerase subunits to form the RNA polymerase II holoenzyme; contributes to both postive and negative transcriptional regulation; dispensible for basal transcription
	CAGL0M04345g	-2.22694320603276		Ortholog(s) have role in U6 snRNA 3'-end processing and mitochondrion, nucleus localization				YLR132C	USB1	Putative poly(U)-specific 3'-to-5' RNA exonuclease; involved in 3'-end processing of U6 snRNA removing uridines and generating a terminal 2&#8242;,3&#8242; cyclic phosphate; essential protein that localizes to the nucleus and mitochondria; overexpression suppresses the respiratory defects of oxa1 and mtf2 mutants; homolog of S.pombe gene, mpn1 and human gene, hUSB1; mutations in hUSB1 are associa…
	CAGL0K01023g	-2.1631057658837		Ortholog(s) have structural constituent of ribosome activity and mitochondrial small ribosomal subunit localization				YGR084C	MRP13	Mitochondrial ribosomal protein of the small subunit
	CAGL0H03531g	-2.1456540320917	MNP1	Putative mitochondrial-nucleoid specific ribosomal protein; protein abundance decreased in ace2 mutant cells	C2_07190C		Putative mitochondrial ribosomal protein; predicted role in aerobic respiration; Spider biofilm repressed	YGL068W	MNP1	Mitochondrial ribosomal protein of the large subunit; has similarity to E. coli L7/L12 and human MRPL7 ribosomal proteins; associates with the mitochondrial nucleoid; required for normal respiratory growth
	CAGL0L04488g	-2.13981257347832		Ortholog(s) have endoribonuclease activity, role in nuclear mRNA surveillance of mRNP export, transcription, DNA-templated and cytoplasm, nucleus localization	C7_00600C		Ortholog(s) have endoribonuclease activity, role in nuclear mRNA surveillance of mRNP export, transcription, DNA-templated and cytoplasm, nucleus localization	YOR166C	SWT1	RNA endoribonuclease involved in perinuclear mRNP quality control; involved in perinuclear mRNP quality control via the turnover of aberrant, unprocessed pre-mRNAs; interacts with subunits of THO/TREX, TREX-2, and RNA polymerase II; contains a PIN (PilT N terminus) domain
	CAGL0J10472g	-2.1331223975368		Ortholog(s) have RNA polymerase II transcription coactivator activity, transcription factor activity, RNA polymerase II transcription factor recruiting activity	C2_01470W	SRB9	Subunit of the RNA polymerase II mediator complex; transposon mutation affects filamentous growth; suppresses S. cerevisiae diploid filamentous (flo8, ste7, ste12, tec1) or haploid invasive (flo8) mutant growth defects	YDR443C	SSN2	Subunit of the RNA polymerase II mediator complex; associates with core polymerase subunits to form the RNA polymerase II holoenzyme; required for stable association of Srb10p-Srb11p kinase; essential for transcriptional regulation
	CAGL0K09768g	-2.13092211597936		Ortholog(s) have structural constituent of ribosome activity and mitochondrial membrane, mitochondrial small ribosomal subunit localization	CR_04140W		Putative mitochondrial ribosomal component of the small subunit; possibly an essential gene, disruptants not obtained by UAU1 method; Spider biofilm repressed	YNL137C	NAM9	Mitochondrial ribosomal component of the small subunit
	CAGL0B01815g	-2.12609519707333		Ortholog(s) have structural constituent of ribosome activity and mitochondrial large ribosomal subunit, nucleolus localization	C5_00030W		Putative mitochondrial ribosomal protein of the large subunit; transcript is upregulated in clinical isolates from HIV+ patients with oral candidiasis; Spider biofilm repressed	YDR116C	MRPL1	Mitochondrial ribosomal protein of the large subunit
	CAGL0H01221g	-2.12285065256359		Ortholog(s) have RNA polymerase II core binding activity and role in DNA damage response, detection of DNA damage, mRNA 3'-end processing, negative regulation of transposition, RNA-mediated	CR_10730C		Ortholog(s) have RNA polymerase II core binding activity and role in DNA damage response, detection of DNA damage, mRNA 3'-end processing, negative regulation of transposition, RNA-mediated	YDR289C	RTT103	Protein involved in transcription termination by RNA polymerase II; interacts with exonuclease Rat1p and Rai1p; has an RPR domain (carboxy-terminal domain interacting domain); also involved in regulation of Ty1 transposition
	CAGL0C04697g	-2.10531947786062		Ortholog(s) have structural constituent of ribosome activity, role in cellular response to drug and mitochondrial small ribosomal subunit localization	C5_04530W		Putative mitochondrial ribosomal protein of the small subunit; mutation confers hypersensitivity to 5-fluorocytosine (5-FC), 5-fluorouracil (5-FU), and tubercidin (7-deazaadenosine)	YJR101W	RSM26	Mitochondrial ribosomal protein of the small subunit
	CAGL0I02706g	-2.08033992988068		Ortholog(s) have structural constituent of ribosome activity and mitochondrial large ribosomal subunit localization	C3_01080W	MRPL33	Putative mitochondrial ribosomal protein of the large subunit; Ssr1-repressed; rat catheter biofilm induced	YMR286W	MRPL33	Mitochondrial ribosomal protein of the large subunit
	CAGL0M03333g	-2.05711754116862		Ortholog(s) have mRNA binding activity	C4_05190C	EDC3	Protein with mRNA binding activity, involved in regulation of activity of putative metacaspase Mca1p	YEL015W	EDC3	Non-essential conserved protein with a role in mRNA decapping; specifically affects the function of the decapping enzyme Dcp1p; mediates decay of the RPS28B mRNA via binding to both Rps28Bp (or Rps28Ap) and the RPS28B mRNA; mediates decay of the YRA1 mRNA by a different, translation-independent mechanism; localizes to cytoplasmic mRNA processing bodies; forms cytoplasmic foci upon DNA replication…
	CAGL0L04224g	-2.0483459140184		Ortholog(s) have structural constituent of ribosome activity and fungal-type vacuole, mitochondrial large ribosomal subunit localization	C1_01580W		Ortholog(s) have structural constituent of ribosome activity and fungal-type vacuole, mitochondrial large ribosomal subunit localization	YOR150W	MRPL23	Mitochondrial ribosomal protein of the large subunit; localizes to vacuole in response to H2O2
	CAGL0M07546g	-2.03541607346886		Ortholog(s) have role in mitochondrial tRNA wobble uridine modification and cytosol, mitochondrial inner membrane localization	C2_00820W		Ortholog(s) have role in mitochondrial tRNA wobble uridine modification and cytosol, mitochondrial inner membrane localization	YMR023C	MSS1	Mitochondrial protein; forms a heterodimer complex with Mto1p that performs the 5-carboxymethylaminomethyl modification of the wobble uridine base in mitochondrial tRNAs; similar to human GTPBP3
	CAGL0J09724g	-2.03015206991825		Ortholog(s) have structural constituent of ribosome activity and mitochondrial large ribosomal subunit localization	C4_04820C		Ortholog(s) have structural constituent of ribosome activity and mitochondrial large ribosomal subunit localization	YDL202W	MRPL11	Mitochondrial ribosomal protein of the large subunit; localizes to vacuole in response to H2O2
	CAGL0M02519g	-2.02369336003535		Ortholog(s) have protein kinase activity, role in protein phosphorylation and cytoplasm localization	CR_02210W		Putative serine/threonine protein kinase; possibly an essential gene, disruptants not obtained by UAU1 method	YPL141C	FRK1	Protein kinase of unknown cellular role; green fluorescent protein (GFP)-fusion protein localizes to the cytoplasm; interacts with rRNA transcription and ribosome biogenesis factors and the long chain fatty acyl-CoA synthetase Faa3p; FRK1 has a paralog, KIN4, that arose from the whole genome duplication
	CAGL0D01386g	-2.02256973855885	MED1	Ortholog(s) have role in negative regulation of transcription from RNA polymerase II promoter, positive regulation of transcription from RNA polymerase II promoter and core mediator complex localization				YPR070W	MED1	Subunit of the RNA polymerase II mediator complex; associates with core polymerase subunits to form the RNA polymerase II holoenzyme; essential for transcriptional regulation
	CAGL0I08481g	-2.01002345337029		Ortholog(s) have structural constituent of ribosome activity	C5_05290C	MRP2	Protein similar to S. cerevisiae Mrp2p, which is a component of the small subunit of the mitochondrial ribosome; transposon mutation affects filamentous growth	YPR166C	MRP2	Mitochondrial ribosomal protein of the small subunit
	CAGL0C01683g	-2.00908228146834		Ortholog(s) have ATPase activity, DNA binding, nucleosome binding, rDNA binding, transcription regulatory region DNA binding activity	C1_07340W		Ortholog(s) have ATPase activity, DNA binding, nucleosome binding, rDNA binding, transcription regulatory region DNA binding activity	YBR245C	ISW1	ATPase subunit of imitation-switch (ISWI) class chromatin remodelers; with Ioc3p forms Isw1a complex involved in repression of transcription initiation; with Ioc2p and Ioc4p forms Isw1b complex involved in regulation of transcription elongation; Isw1b recruited to ORFs by H3K36 methylation and acts with Chd1p to prevent trans-histone exchange over coding regions; Isw1p import into nucleus depends…
	CAGL0B02167g	-1.98908205697009		Ortholog(s) have structural constituent of ribosome activity and mitochondrial large ribosomal subunit, mitochondrial membrane localization	CR_00490W		Putative mitochondrial ribosomal protein of the large subunit; Hap43p-repressed gene; ortholog of S. cerevisiae MRPL9	YGR220C	MRPL9	Mitochondrial ribosomal protein of the large subunit
	CAGL0H05379g	-1.98227508397668		Ortholog(s) have RNA polymerase II core promoter proximal region sequence-specific DNA binding, transcriptional activator activity, RNA polymerase II core promoter proximal region sequence-specific binding activity				YPL075W	GCR1	Transcriptional activator of genes involved in glycolysis; DNA-binding protein that interacts and functions with the transcriptional activator Gcr2p
	CAGL0G01672g	-1.97961694518834		Ortholog(s) have structural molecule activity, role in positive regulation of mitotic metaphase/anaphase transition and cytosol, nucleus, proteasome regulatory particle, lid subcomplex localization	CR_08910C	RPN7	Subunit of the proteasome regulatory particle; regulated by Gcn2p and Gcn4p; protein present in exponential and stationary growth phase yeast cultures	YPR108W	RPN7	Essential non-ATPase regulatory subunit of the 26S proteasome; similar to another S. cerevisiae regulatory subunit, Rpn5p, as well as to mammalian proteasome subunits
	CAGL0J10230g	-1.97526513237816		Ortholog(s) have lysine-tRNA ligase activity, role in mitochondrial lysyl-tRNA aminoacylation, tRNA import into mitochondrion and mitochondrion localization	C7_01870W	MSK1	Putative mitochondrial lysine-tRNA synthetase; flucytosine repressed	YNL073W	MSK1	Mitochondrial lysine-tRNA synthetase; required for import of both aminoacylated and deacylated forms of tRNA(Lys) into mitochondria and for aminoacylation of mitochondrially encoded tRNA(Lys)
	CAGL0J07568g	-1.96872249027501		Ortholog(s) have RNA polymerase II core promoter proximal region sequence-specific DNA binding, cysteine-type peptidase activity, mRNA binding, single-stranded DNA binding activity	CR_04480C	LAP3	Putative aminopeptidase; positively regulated by Sfu1; clade-associated gene expression; virulence-group-correlated expression; induced by alpha pheromone in SpiderM medium; Hap43-induced; Spider and flow model biofilm induced	YNL239W	LAP3	Cysteine aminopeptidase with homocysteine-thiolactonase activity; protects cells against homocysteine toxicity; has bleomycin hydrolase activity in vitro; transcription is regulated by galactose via Gal4p; orthologous to human BLMH
	CAGL0J09878g	-1.95417145510651		Ortholog(s) have DNA binding, bending, RNA polymerase III type 1 promoter sequence-specific DNA binding and RNA polymerase III type 2 promoter sequence-specific DNA binding, more	C4_01910W		Putative RNA polymerase III transcription initiation factor complex (TFIIIC) subunit; possibly an essential gene, disruptants not obtained by UAU1 method	YBR123C	TFC1	Subunit of RNA polymerase III transcription initiation factor complex; one of six subunits of the RNA polymerase III transcription initiation factor complex (TFIIIC); part of the TauA globular domain of TFIIIC that binds DNA at the BoxA promoter sites of tRNA and similar genes; human homolog is TFIIIC-63
	CAGL0K01419g	-1.95161948163832		Ortholog(s) have RNA binding activity, role in cytoplasmic translation, mRNA processing and mitochondrion localization	C1_08630W		Ortholog(s) have RNA binding activity, role in cytoplasmic translation, mRNA processing and mitochondrion localization	YDL044C	MTF2	Mitochondrial protein that interacts with mitochondrial RNA polymerase; interacts with an N-terminal region of mitochondrial RNA polymerase (Rpo41p) and couples RNA processing and translation to transcription
	CAGL0I08877g	-1.92510292769441		Ortholog(s) have structural constituent of ribosome activity and mitochondrial small ribosomal subunit localization	C2_05300C		S. cerevisiae ortholog Mrps35p is a structural constituent of ribosome and localizes to mitochondrial small ribosomal subunit; the snoRNA CD39 is encoded within the MRPS35 intron	YGR165W	MRPS35	Mitochondrial ribosomal protein of the small subunit; null mutant does not grow on glycerol, is sensitive to 2,4-dichlorophenol, and accumulates large lipid droplets
	CAGL0A02387g	-1.92143511372212		Ortholog(s) have structural constituent of ribosome activity and mitochondrial small ribosomal subunit localization	C3_01850W		Ortholog(s) have structural constituent of ribosome activity and mitochondrial small ribosomal subunit localization	YDR347W	MRP1	Mitochondrial ribosomal protein of the small subunit; MRP1 exhibits genetic interactions with PET122, encoding a COX3-specific translational activator, and with PET123, encoding a small subunit mitochondrial ribosomal protein
	CAGL0E01551g	-1.91769535051648		Ortholog(s) have protein kinase activator activity and role in negative regulation of transcription from RNA polymerase II promoter, positive regulation of transcription from RNA polymerase II promoter	C3_02440C	MED7	Subunit of the RNA polymerase II mediator complex	YOL135C	MED7	Subunit of the RNA polymerase II mediator complex; associates with core polymerase subunits to form the RNA polymerase II holoenzyme; essential for transcriptional regulation
	CAGL0K05511g	-1.90942675922691		Ortholog(s) have GTP binding, protein binding, bridging activity				YOR076C	SKI7	GTP-binding protein that couples the Ski complex and exosome; putative pseudo-translational GTPase involved in 3'-to-5' mRNA decay pathway; interacts with both the cytoplasmic exosome and the Ski complex; eRF3-like domain targets nonstop mRNA for degradation; null mutants have a superkiller phenotype; SKI7 has a paralog, HBS1, that arose from the whole genome duplication
	CAGL0D02332g	-1.90498264488952		Ortholog(s) have RNA binding activity, role in mRNA polyadenylation, pre-mRNA cleavage required for polyadenylation, response to drug and mRNA cleavage and polyadenylation specificity factor complex localization	C3_03260W		Putative mRNA cleavage and polyadenlylation factor; heterozygous null mutant exhibits hypersensitivity to parnafungin and cordycepin in the C. albicans fitness test	YLR115W	CFT2	Subunit of the mRNA cleavage and polyadenlylation factor (CPF); required for pre-mRNA cleavage, polyadenylation and poly(A) site recognition, 43% similarity with the mammalian CPSF-100 protein.
	CAGL0I07073g	-1.89071546193167		Ortholog(s) have role in nuclear-transcribed mRNA catabolic process, 3'-5' exonucleolytic nonsense-mediated decay, nuclear-transcribed mRNA catabolic process, non-stop decay and protein complex assembly, more	C6_03890C	SKI8	Ortholog(s) have role in nuclear-transcribed mRNA catabolic process, 3'-5' exonucleolytic nonsense-mediated decay, nuclear-transcribed mRNA catabolic process, non-stop decay and protein complex assembly, more	YGL213C	SKI8	Ski complex component and WD-repeat protein; mediates 3'-5' RNA degradation by the cytoplasmic exosome; also required for meiotic double-strand break recombination; null mutants have superkiller phenotype
	CAGL0M07073g	-1.88460777196079		Ortholog(s) have aminoacyl-tRNA hydrolase activity, role in mitochondrial translation and mitochondrion localization	C1_08820C		Ortholog(s) have aminoacyl-tRNA hydrolase activity, role in mitochondrial translation and mitochondrion localization	YHR189W	PTH1	One of two mitochondrially-localized peptidyl-tRNA hydrolases; dispensable for respiratory growth on rich medium, but required for respiratory growth on minimal medium; see also PTH2
	CAGL0G07931g	-1.87113145511567		Ortholog(s) have mitochondrion, ribosome localization	C1_06070W		Ortholog(s) have mitochondrion, ribosome localization	YNR036C	MRPS12	Mitochondrial protein; may interact with ribosomes based on co-purification experiments; similar to E. coli and human mitochondrial S12 ribosomal proteins
	CAGL0L08866g	-1.85953622619136		Ortholog(s) have DNA binding, bending, RNA polymerase III type 1 promoter sequence-specific DNA binding, RNA polymerase III type 2 promoter sequence-specific DNA binding and transcription factor activity, more				YPL007C	TFC8	Subunit of RNA polymerase III transcription initiation factor complex; one of six subunits of RNA polymerase III transcription initiation factor complex (TFIIIC); part of TFIIIC TauB domain that binds BoxB promoter sites of tRNA and other genes; linker between TauB and TauA domains; human homolog is TFIIIC-90
	CAGL0G03333g	-1.85695713314698		Ortholog(s) have role in negative regulation of transposition, RNA-mediated and cytoplasm, nucleus localization				YER104W	RTT105	Protein with a role in regulation of Ty1 transposition
	CAGL0M06875g	-1.8543042172615		Ortholog(s) have RNA polymerase II core promoter sequence-specific DNA binding, cyclin-dependent protein serine/threonine kinase regulator activity	C3_05740C	SSN8	Ortholog of S. cerevisiae Ssn8; a component of RNA polymerase II holoenzyme; mutants are viable and are sensitive to hydrogen peroxide medium	YNL025C	SSN8	Cyclin-like component of the RNA polymerase II holoenzyme; involved in phosphorylation of the RNA polymerase II C-terminal domain; forms a kinase-cyclin pair in the RNAPII holoenzyme with Ssn3p; required for both entry into and execution of the meiotic program; involved in glucose repression and telomere maintenance; cyclin homolog 35% identical to human cyclin C
	CAGL0H03025g	-1.83232789489898		Ortholog(s) have poly(A)-specific ribonuclease activity, role in nuclear-transcribed mRNA poly(A) tail shortening, postreplication repair and PAN complex localization	C1_09070W		Ortholog(s) have poly(A)-specific ribonuclease activity, role in nuclear-transcribed mRNA poly(A) tail shortening, postreplication repair and PAN complex localization	YGL094C	PAN2	Catalytic subunit of the Pan2p-Pan3p poly(A)-ribonuclease complex; complex acts to control poly(A) tail length and regulate the stoichiometry and activity of postreplication repair complexes
	CAGL0D03828g	-1.8205415684409		Ortholog(s) have RNA polymerase II transcription coactivator activity involved in preinitiation complex assembly, protein kinase activator activity	C3_06350W		Ortholog(s) have RNA polymerase II transcription coactivator activity involved in preinitiation complex assembly activity	YHR058C	MED6	Subunit of the RNA polymerase II mediator complex; associates with core polymerase subunits to form the RNA polymerase II holoenzyme; essential for transcriptional regulation; protein abundance increases in response to DNA replication stress
	CAGL0L04334g	-1.81853130678223		Ortholog(s) have structural constituent of ribosome activity and mitochondrial small ribosomal subunit localization	C6_00550W		Ortholog(s) have structural constituent of ribosome activity and mitochondrial small ribosomal subunit localization	YOR158W	PET123	Mitochondrial ribosomal protein of the small subunit; PET123 exhibits genetic interactions with PET122, which encodes a COX3 mRNA-specific translational activator
	CAGL0G02277g	-1.79263320042287		Ortholog(s) have structural constituent of ribosome activity and mitochondrial large ribosomal subunit localization	C5_03410C		Ortholog(s) have structural constituent of ribosome activity and mitochondrial large ribosomal subunit localization	YKR085C	MRPL20	Mitochondrial ribosomal protein of the large subunit
	CAGL0B01793g	-1.76361706311619		Ortholog(s) have mitochondrion, nucleus localization	C5_00320W		Ortholog(s) have mitochondrion, nucleus localization	YDR115W	YDR115W	Putative mitochondrial ribosomal protein of the large subunit; similar to E. coli L34 ribosomal protein; required for respiratory growth, as are most mitochondrial ribosomal proteins; protein increases in abundance and relocalizes to the plasma membrane upon DNA replication stress
	CAGL0J07832g	-1.7596177785174		Ortholog(s) have structural constituent of ribosome activity and mitochondrial large ribosomal subunit localization	C5_00820W		Ortholog(s) have structural constituent of ribosome activity and mitochondrial large ribosomal subunit localization	YNL252C	MRPL17	Mitochondrial ribosomal protein of the large subunit
	CAGL0G02255g	-1.75542742114484		Ortholog(s) have GTPase activity, ribosome binding activity and role in nonfunctional rRNA decay, nuclear-transcribed mRNA catabolic process, no-go decay, positive regulation of translation, ribosome disassembly	C7_04260W		Ortholog(s) have GTPase activity, ribosome binding activity and role in nonfunctional rRNA decay, nuclear-transcribed mRNA catabolic process, no-go decay, positive regulation of translation, ribosome disassembly	YKR084C	HBS1	GTPase with similarity to translation release factors; together with binding partner Dom34p, facilitates ribosomal subunit dissociation and peptidyl-tRNA release when translation is stalled, particularly in 3' UTRs; genetically implicated in mRNA no-go decay; HBS1 has a paralog, SKI7, that arose from the whole genome duplication
	CAGL0I09372g	-1.74195112507822		Ortholog(s) have structural constituent of ribosome activity and mitochondrial large ribosomal subunit localization	C1_04880C	MRPL37	Putative mitochondrial large subunit ribosomal protein; shows colony morphology-related gene regulation by Ssn6p	YBR268W	MRPL37	Mitochondrial ribosomal protein of the large subunit
	CAGL0G09779g	-1.73608263694642		Ortholog(s) have role in termination of RNA polymerase II transcription, exosome-dependent, termination of RNA polymerase II transcription, poly(A)-coupled and mRNA cleavage and polyadenylation specificity factor complex localization				YOR179C	SYC1	Subunit of the APT subcomplex of cleavage and polyadenylation factor; may have a role in 3' end formation of both polyadenylated and non-polyadenylated RNAs; SYC1 has a paralog, YSH1, that arose from the whole genome duplication
	CAGL0A04653g	-1.73427262561627		Ortholog(s) have glutaminyl-tRNA synthase (glutamine-hydrolyzing) activity, role in glutaminyl-tRNAGln biosynthesis via transamidation, mitochondrial translation and glutamyl-tRNA(Gln) amidotransferase complex, mitochondrion localization	C1_05610W		Ortholog(s) have glutaminyl-tRNA synthase (glutamine-hydrolyzing) activity, role in glutaminyl-tRNAGln biosynthesis via transamidation, mitochondrial translation and glutamyl-tRNA(Gln) amidotransferase complex, mitochondrion localization	YBL080C	PET112	Subunit of the trimeric GatFAB AmidoTransferase(AdT) complex; involved in the formation of Q-tRNAQ; mutation is functionally complemented by the bacterial GatB ortholog
	CAGL0I00660g	-1.7181233360693		Ortholog(s) have GTPase activity, ribosome binding activity, role in positive regulation of translation and mitochondrial matrix, mitochondrial ribosome, nucleus localization	C2_06200C		Ortholog(s) have GTPase activity, ribosome binding activity, role in positive regulation of translation and mitochondrial matrix, mitochondrial ribosome, nucleus localization	YLR289W	GUF1	Mitochondrial matrix GTPase; associates with mitochondrial ribosomes; important for translation under temperature and nutrient stress; may have a role in translational fidelity; similar to bacterial LepA elongation factor
	CAGL0J05258g	-1.70936139311854		Ortholog(s) have structural constituent of ribosome activity and mitochondrial large ribosomal subunit localization	CR_07390C	MRPL8	Mitochondrial 60S ribosomal protein subunit; Hap43p-repressed gene	YJL063C	MRPL8	Mitochondrial ribosomal protein of the large subunit
	CAGL0J11858g	-1.69370478280213	RML2	Ortholog(s) have structural constituent of ribosome activity, role in mitochondrial translation and mitochondrial large ribosomal subunit localization	C3_00450C		Ortholog(s) have structural constituent of ribosome activity, role in mitochondrial translation and mitochondrial large ribosomal subunit localization	YEL050C	RML2	Mitochondrial ribosomal protein of the large subunit (L2); has similarity to E. coli L2 ribosomal protein; mutant allele (fat21) causes inability to utilize oleate, and induce oleic acid oxidation; may interfere with activity of the Adr1p transcription factor
	CAGL0I08063g	-1.67804593189805		Ortholog(s) have RNA binding, double-stranded DNA binding activity	C1_11910W		Putative nuclear pore-associated protein; Hap43p-induced gene; induced upon low-level peroxide stress; possibly an essential gene, disruptants not obtained by UAU1 method	YOL072W	THP1	Nuclear pore-associated protein; component of TREX-2 complex (Sac3p-Thp1p-Sus1p-Cdc31p) involved in transcription elongation and mRNA export from the nucleus; involved in post-transcriptional tethering of active genes to the nuclear periphery and to non-nascent mRNP; contains a PAM domain implicated in protein-protein binding
	CAGL0J07854g	-1.67022688339443		Ortholog(s) have mRNA binding activity and transcription export complex localization	C5_00840W		Ortholog(s) have mRNA binding activity and transcription export complex localization	YNL253W	TEX1	Protein involved in mRNA export; component of the transcription export (TREX) complex
	CAGL0E06446g	-1.66112409380281		Ortholog(s) have RNA lariat debranching enzyme activity, role in RNA catabolic process, mRNA cis splicing, via spliceosome, pseudohyphal growth, snoRNA metabolic process, transposition, RNA-mediated and nucleus localization	C6_02050W	DBR1	Debranchase; homozygous mutant accumulates lariat intermediates of mRNA splicing; rat catheter biofilm repressed	YKL149C	DBR1	RNA lariat debranching enzyme; catalyzes debranching of lariat introns formed during pre-mRNA splicing; required for efficient Ty1 transposition; knockdown of human homolog Dbr1 rescues toxicity of RNA-binding proteins TDP-43 and FUS which are implicated in amyotrophic lateral sclerosis (ALS), suggests potential therapeutic target for ALS and related TDP-43 proteinopathies; human homolog DBR1 can…
	CAGL0K11044g	-1.65486487887608		Ortholog(s) have structural constituent of ribosome activity and mitochondrial large ribosomal subunit localization	C2_07680W		Ortholog(s) have structural constituent of ribosome activity and mitochondrial large ribosomal subunit localization	YDR237W	MRPL7	Mitochondrial ribosomal protein of the large subunit; MRPL7 produces both YmL5 and YmL7, which are two different modified forms of the same protein
	CAGL0G06776g	-1.65035210294621		Ortholog(s) have structural constituent of ribosome activity and mitochondrial inner membrane, mitochondrial large ribosomal subunit localization	CR_04580W		Ortholog(s) have structural constituent of ribosome activity and mitochondrial inner membrane, mitochondrial large ribosomal subunit localization	YCR003W	MRPL32	Mitochondrial ribosomal protein of the large subunit; protein abundance increases in response to DNA replication stress
	CAGL0J09856g	-1.64718930584068		Ortholog(s) have structural constituent of ribosome activity, role in mitochondrial translation and mitochondrial large ribosomal subunit localization	C5_01700W		Mitochondrial ribosomal protein of the large subunit; rat catheter biofilm induced	YBR122C	MRPL36	Mitochondrial ribosomal protein of the large subunit; overproduction suppresses mutations in the COX2 leader peptide-encoding region
	CAGL0M08338g	-1.64614118588165		Ortholog(s) have structural constituent of ribosome activity and mitochondrial large ribosomal subunit localization	C5_00130C		Ortholog(s) have structural constituent of ribosome activity and mitochondrial large ribosomal subunit localization	YKL170W	MRPL38	Mitochondrial ribosomal protein of the large subunit; appears as two protein spots (YmL34 and YmL38) on two-dimensional SDS gels; protein abundance increases in response to DNA replication stress
	CAGL0L00451g	-1.64055318144423		Ortholog(s) have structural constituent of ribosome activity and mitochondrial small ribosomal subunit localization	C4_00660W		Ortholog(s) have structural constituent of ribosome activity and mitochondrial small ribosomal subunit localization	YMR188C	MRPS17	Mitochondrial ribosomal protein of the small subunit
	CAGL0F01133g	-1.63737703574532		Ortholog(s) have role in mitochondrial translation and mitochondrion localization	CR_03110W		Ortholog(s) have role in mitochondrial translation and mitochondrion localization	YOL033W	MSE1	Mitochondrial glutamyl-tRNA synthetase; predicted to be palmitoylated
	CAGL0L06908g	-1.6263231234605		Ortholog(s) have ATP-dependent RNA helicase activity	C4_00220C	SUB2	Putative TREX complex component with a predicted role in nuclear mRNA export; transcription is regulated by Mig1; Hap43-induced gene; Spider biofilm repressed	YDL084W	SUB2	Component of the TREX complex required for nuclear mRNA export; member of the DEAD-box RNA helicase superfamily and is involved in early and late steps of spliceosome assembly; homolog of the human splicing factor hUAP56; relocalizes from nucleus to cytoplasm upon DNA replication stress
	CAGL0G00506g	-1.61990830224744		Ortholog(s) have mRNA binding activity, role in cytoplasmic translation, regulation of translation and cytoplasmic stress granule, cytosol, polysomal ribosome localization	C5_04920C		Ortholog(s) have mRNA binding activity, role in cytoplasmic translation, regulation of translation and cytoplasmic stress granule, cytosol, polysomal ribosome localization	YGR271W	SLH1	Putative RNA helicase related to Ski2p; involved in translation inhibition of non-poly(A) mRNAs; required for repressing propagation of dsRNA viruses
	CAGL0G07205g	-1.59934828548896		Ortholog(s) have structural constituent of ribosome activity and mitochondrial large ribosomal subunit localization	C7_00950W	YML6	Putative mitochondrial ribosomal protein; induced upon adherence to polystyrene	YML025C	YML6	Mitochondrial ribosomal protein of the large subunit; has similarity to E. coli L4 ribosomal protein and human mitoribosomal MRP-L4 protein; essential for viability, unlike most other mitoribosomal proteins
	CAGL0F04257g	-1.58886121347905		Ortholog(s) have mRNA binding activity, role in intracellular mRNA localization, mRNA stabilization, telomere maintenance via telomerase and P-body, nuclear chromosome, telomeric region localization	C6_03380W		S. cerevisiae ortholog Hek2/Khd1 is a putative RNA binding protein involved in the asymmetric localization of ASH1 mRNA; Hap43-induced gene	YBL032W	HEK2	RNA binding protein involved in asymmetric localization of ASH1 mRNA; represses translation of ASH1 mRNA, an effect reversed by Yck1p-dependent phosphoryation; regulates telomere position effect and length; similarity to hnRNP-K
	CAGL0C02563g	-1.58357272596101		Ortholog(s) have mRNA binding activity, role in nuclear-transcribed mRNA catabolic process, 3'-5' exonucleolytic nonsense-mediated decay, nuclear-transcribed mRNA catabolic process, non-stop decay and Ski complex, cytosol localization	CR_08570W	SKI2	Ortholog(s) have mRNA binding activity, role in nuclear-transcribed mRNA catabolic process, 3'-5' exonucleolytic nonsense-mediated decay, nuclear-transcribed mRNA catabolic process, non-stop decay and Ski complex, cytosol localization	YLR398C	SKI2	Ski complex component and putative RNA helicase; mediates 3'-5' RNA degradation by the cytoplasmic exosome; null mutants have superkiller phenotype of increased viral dsRNAs and are synthetic lethal with mutations in 5'-3' mRNA decay; mutations in the human ortholog, SKIV2L, causes Syndromic diarrhea/Trichohepatoenteric (SD/THE) syndrome
	CAGL0L12760g	-1.57467113426127		Ortholog(s) have calcium ion binding, core promoter binding, guanyl-nucleotide exchange factor activity, phospholipid binding, transcription factor activity, sequence-specific DNA binding activity	C3_06010W	CAM1	Putative translation elongation factor eEF1 gamma; protein level decreased in stationary phase cultures; Spider biofilm repressed	YPL048W	CAM1	One of two isoforms of the gamma subunit of eEF1B; stimulates the release of GDP from eEF1A (Tef1p/Tef2p) post association with the ribosomal complex with eEF1Balpha subunit; nuclear protein required for transcription of MXR1; binds the MXR1 promoter in the presence of other nuclear factors; binds calcium and phospholipids
	CAGL0M08382g	-1.57344237814426		Ortholog(s) have structural constituent of ribosome activity, role in mitochondrial translation and mitochondrial large ribosomal subunit localization	C7_02120C		Ortholog(s) have structural constituent of ribosome activity, role in mitochondrial translation and mitochondrial large ribosomal subunit localization	YKL167C	MRP49	Mitochondrial ribosomal protein of the large subunit; not essential for mitochondrial translation
	CAGL0F04411g	-1.56425287046698		Ortholog(s) have structural constituent of ribosome activity, role in mitochondrial translation and mitochondrial large ribosomal subunit localization	C2_01030W		Ortholog(s) have structural constituent of ribosome activity, role in mitochondrial translation and mitochondrial large ribosomal subunit localization	YBL038W	MRPL16	Mitochondrial ribosomal protein of the large subunit; homologous to bacterial L16 ribosomal protein; synthetic lethality with hac1 mutation suggests a possible role in synthesis of precursors for protein glycosylation
	CAGL0E04026g	-1.56105415127403		Ortholog(s) have RNA binding activity, role in Group I intron splicing and mitochondrion localization				YHL038C	CBP2	Required for splicing of the group I intron bI5 of the COB pre-mRNA; nuclear-encoded mitochondrial protein that binds to the RNA to promote splicing; also involved in but not essential for splicing of the COB bI2 intron and the intron in the 21S rRNA gene
	CAGL0M10637g	-1.55267761511111		Ortholog(s) have structural constituent of ribosome activity and mitochondrial large ribosomal subunit localization	C2_07030C		Ortholog(s) have structural constituent of ribosome activity and mitochondrial large ribosomal subunit localization	YNR022C	MRPL50	Mitochondrial ribosomal protein of the large subunit; not essential for mitochondrial translation
	CAGL0M12617g	-1.54967917710366		Ortholog(s) have role in regulation of chromatin silencing at telomere, ribosomal small subunit export from nucleus and cytosol, nuclear pore, nucleus localization	C2_05530C		Ortholog(s) have role in regulation of chromatin silencing at telomere, ribosomal small subunit export from nucleus and cytosol, nuclear pore, nucleus localization	YIL063C	YRB2	Protein of unknown function; involved in nuclear processes of the Ran-GTPase cycle; involved in nuclear protein export; contains Ran Binding Domain and FxFG repeats; interacts with Srm1p, GTP-Gsp1p, Rna1p and Crm1p; relocalizes to the cytosol in response to hypoxia; not essential for viability
	CAGL0K09064g	-1.53544772693661		Ortholog(s) have thiosulfate sulfurtransferase activity, role in tRNA wobble position uridine thiolation and mitochondrion localization	C2_09960W		Ortholog(s) have thiosulfate sulfurtransferase activity, role in tRNA wobble position uridine thiolation and mitochondrion localization	YOR251C	TUM1	Rhodanese domain sulfur transferase; accepts persulfite from Nfs1p and transfers it to Uba4p in the pathway for 2-thiolation of the wobble uridine base of tRNAs; also stimulates sulfur transfer by Nfs1p; may be mitochondrially localized
	CAGL0M00858g	-1.5339953887543	MRPL4	Protein of the large subunit of the mitochondrial ribosome	CR_07320C		Ortholog of S. cerevisiae Mrpl4, a mitochondrial ribosomal protein of the large subunit; repressed by nitric oxide	YLR439W	MRPL4	Mitochondrial ribosomal protein of the large subunit; homolog of prokaryotic L29 ribosomal protein; located at the ribosomal tunnel exit
	CAGL0G02497g	-1.50153336047296		Ortholog(s) have mRNA binding, ribonucleoprotein complex binding activity	C4_01060W	MLP1	Ortholog(s) have mRNA binding, ribonucleoprotein complex binding activity	YKR095W	MLP1	Myosin-like protein associated with the nuclear envelope; nuclear basket protein that connects the nuclear pore complex with the nuclear interior; involved with Tel1p in telomere length control; involved with Pml1p and Pml39p in nuclear retention of unspliced mRNAs; MLP1 has a paralog, MLP2, that arose from the whole genome duplication
	CAGL0F07249g	-1.47503194103525		Ortholog(s) have RNA polymerase II activating transcription factor binding, chromatin binding, protein complex scaffold activity	C3_06650C	TAF60	Putative TFIID and SAGA complex subunit; mutation confers hypersensitivity to amphotericin B	YGL112C	TAF6	Subunit (60 kDa) of TFIID and SAGA complexes; involved in transcription initiation of RNA polymerase II and in chromatin modification, similar to histone H4; relocalizes to the cytosol in response to hypoxia
	CAGL0G04675g	-1.47181399031729		Ortholog(s) have structural constituent of ribosome activity, role in mitochondrial translational initiation and mitochondrial small ribosomal subunit localization				YDR494W	RSM28	Mitochondrial ribosomal protein of the small subunit; genetic interactions suggest a possible role in promoting translation initiation
	CAGL0M01100g	-1.45889028076094		Ortholog(s) have structural constituent of ribosome activity and mitochondrial small ribosomal subunit localization	CR_01370C		Ortholog(s) have structural constituent of ribosome activity and mitochondrial small ribosomal subunit localization	YDR337W	MRPS28	Mitochondrial ribosomal protein of the small subunit
	CAGL0B02255g	-1.4551717725865		Ortholog(s) have structural constituent of ribosome activity and mitochondrial small ribosomal subunit localization	C1_01090C		Ortholog(s) have structural constituent of ribosome activity and mitochondrial small ribosomal subunit localization	YGR215W	RSM27	Mitochondrial ribosomal protein of the small subunit
	CAGL0B01331g	-1.44744435508827		Ortholog(s) have enzyme activator activity, mRNA binding activity, role in deadenylation-dependent decapping of nuclear-transcribed mRNA and P-body, cytoplasmic side of membrane, nucleus localization	C1_05420W		Ortholog(s) have enzyme activator activity, mRNA binding activity, role in deadenylation-dependent decapping of nuclear-transcribed mRNA and P-body, cytoplasmic side of membrane, nucleus localization	YOL149W	DCP1	Subunit of the Dcp1p-Dcp2p decapping enzyme complex; decapping complex removes the 5' cap structure from mRNAs prior to their degradation; enhances the activity of catalytic subunit Dcp2p; regulated by DEAD box protein Dhh1p; forms cytoplasmic foci upon DNA replication stress
	CAGL0D06314g	-1.4466912011829		Ortholog(s) have mRNA binding, translation initiation factor activity, translation initiation factor binding activity and role in stress granule assembly, translational initiation				YGL049C	TIF4632	Translation initiation factor eIF4G; subunit of the mRNA cap-binding protein complex (eIF4F) that also contains eIF4E (Cdc33p); associates with the poly(A)-binding protein Pab1p, also interacts with eIF4A (Tif1p); TIF4632 has a paralog, TIF4631, that arose from the whole genome duplication
	CAGL0H07227g	-1.44463318682879		Ortholog(s) have role in filamentous growth and mitochondrial envelope localization	C4_03780C		Putative mitochondrial membrane protein; homozygous transposon insertion causes decreased colony wrinkling under filamentous growth-inducing conditions, but does not block true hyphal formation in liquid media	YDR316W	OMS1	Protein integral to the mitochondrial membrane; has a conserved methyltransferase motif and is predicted to be an RNA methyltransferase; multicopy suppressor of respiratory defects caused by OXA1 mutations
	CAGL0E04070g	-1.439121761083		Ortholog(s) have protein-lysine N-methyltransferase activity, role in peptidyl-lysine monomethylation and cytoplasm localization				YHL039W	EFM1	Lysine methyltransferase; involved in the monomethylation of eEF1A (Tef1p/Tef2p); SET-domain family member; predicted involvement in ribosome biogenesis; green fluorescent protein (GFP)-fusion protein localizes to the cytoplasm
	CAGL0L05874g	-1.43140587654012		Ortholog(s) have 5'-3' exoribonuclease activity, chromatin binding, mRNA binding, magnesium ion binding, microtubule binding, recombinase activity	C1_13420C	KEM1	5'->3' exoribonuclease of cytoplasmic stress granules; role in filamentous growth; complements slow growth/mating of S. cerevisiae kem1 mutant; required for SD or Spider medium biofilm formation	YGL173C	XRN1	Evolutionarily-conserved 5'-3' exonuclease; component of cytoplasmic processing (P) bodies involved in mRNA decay; also enters the nucleus and positively regulates transcription initiation and elongation; plays a role in microtubule-mediated processes, filamentous growth, ribosomal RNA maturation, and telomere maintenance; activated by the scavenger decapping enzyme Dcs1p
	CAGL0M01540g	-1.42405931232885	SPT3	Ortholog(s) have transcription cofactor activity	CR_10450C	SPT3	Functional homolog of S. cerevisiae Spt3p; required for virulence in mouse systemic infection; homozygous null mutant is hyperfilamentous	YDR392W	SPT3	Subunit of the SAGA and SAGA-like transcriptional regulatory complexes; interacts with Spt15p to activate transcription of some RNA polymerase II-dependent genes, also functions to inhibit transcription at some promoters; relocalizes to the cytosol in response to hypoxia
	CAGL0H00308g	-1.40943982372113		Ortholog(s) have chromatin binding activity, role in positive regulation of transcription elongation from RNA polymerase II promoter and NuA3b histone acetyltransferase complex, cytosol localization	C6_01590W		Protein of unknown function; flow model biofilm induced	YLR455W	PDP3	Component of the NuA3b histone acetyltransferase complex; regulates interaction between NuA3b and H3K36me3 at the transcribed regions of genes; contains PWWP domain; deletion confers sensitivity to 4-(N-(S-glutathionylacetyl)amino) phenylarsenoxide (GSAO); protein abundance increases in response to DNA replication stress; relocalizes to the cytosol in response to hypoxia
	CAGL0I03036g	-1.3764176256324		Ortholog(s) have structural constituent of ribosome activity and mitochondrial large ribosomal subunit, nucleolus localization	C2_05000C	MRPL10	Putative mitochondrial large subunit ribosomal protein; colony morphology-related gene regulation by Ssn6	YNL284C	MRPL10	Mitochondrial ribosomal protein of the large subunit; appears as two protein spots (YmL10 and YmL18) on two-dimensional SDS gels
	CAGL0B03267g	-1.37401433846802		Ortholog(s) have structural constituent of ribosome activity and mitochondrial large ribosomal subunit localization	C1_03650C	MRPL27	Putative 60S ribosomal protein L27, mitochondrial precursor	YBR282W	MRPL27	Mitochondrial ribosomal protein of the large subunit; homolog of human Bcl-2 interacting protein BMRP
	CAGL0E02013g	-1.37386171615137		Ortholog(s) have cytosolic large ribosomal subunit localization	C3_05100C	RPL18	Predicted ribosomal protein; Plc1p-regulated, Tbf1-activated; repressed upon phagocytosis by murine macrophage; Hap43p-induced; Spider biofilm repressed	YOL120C	RPL18A	Ribosomal 60S subunit protein L18A; intron of RPL18A pre-mRNA forms stem-loop structures that are a target for Rnt1p cleavage leading to degradation; homologous to mammalian ribosomal protein L18, no bacterial homolog; RPL18A has a paralog, RPL18B, that arose from the whole genome duplication
	CAGL0K09262g	-1.35281711706305		Ortholog(s) have actin monomer binding, protein kinase inhibitor activity, ribosome binding activity, role in negative regulation of protein phosphorylation and cytoplasm, nucleus, polysome, ribosome localization	CR_00820C		Ortholog(s) have actin monomer binding, protein kinase inhibitor activity, ribosome binding activity, role in negative regulation of protein phosphorylation and cytoplasm, nucleus, polysome, ribosome localization	YCR059C	YIH1	Negative regulator of eIF2 kinase Gcn2p; competes with Gcn2p for binding to Gcn1p; may contribute to regulation of translation in response to starvation via regulation of Gcn2p; binds to monomeric actin and to ribosomes and polyribosomes; ortholog of mammalian IMPACT
	CAGL0M03069g	-1.34500453211827		Ortholog(s) have role in mitochondrial translational initiation and mitochondrion localization				YMR282C	AEP2	Mitochondrial protein; likely involved in translation of the mitochondrial OLI1 mRNA; exhibits genetic interaction with the OLI1 mRNA 5'-untranslated leader
	CAGL0J01199g	-1.33140966337524		Ortholog(s) have role in mRNA stabilization, mitochondrial proton-transporting ATP synthase complex assembly and mitochondrial inner membrane localization	CR_03350C		Putative tRNA-Pro synthetase; genes encoding ribosomal subunits, translation factors, and tRNA synthetases are downregulated upon phagocytosis by murine macrophage	YMR098C	ATP25	Mitochondrial protein required for the stability of Oli1p (Atp9p) mRNA; also required for the Oli1p ring formation; YMR098C is not an essential gene
	CAGL0L10824g	-1.32819867941414		Ortholog(s) have structural constituent of ribosome activity and mitochondrial large ribosomal subunit localization	C5_01050C		Ortholog(s) have structural constituent of ribosome activity and mitochondrial large ribosomal subunit localization	YCR046C	IMG1	Mitochondrial ribosomal protein of the large subunit; required for respiration and for maintenance of the mitochondrial genome
	CAGL0D02024g	-1.32067575607168		Ortholog(s) have structural constituent of ribosome activity and mitochondrial large ribosomal subunit localization	C2_01740C		Mitochondrial ribosomal protein of the large subunit; rat catheter biofilm induced	YKL138C	MRPL31	Mitochondrial ribosomal protein of the large subunit
	CAGL0L08822g	-1.31534811778365		Ortholog(s) have mRNA binding, ribosomal large subunit binding, tRNA binding activity and role in rescue of stalled ribosome, ribosome-associated ubiquitin-dependent protein catabolic process	CR_01820W		Ortholog(s) have mRNA binding, ribosomal large subunit binding, tRNA binding activity and role in rescue of stalled ribosome, ribosome-associated ubiquitin-dependent protein catabolic process	YPL009C	RQC2	Component of RQC, which mediates nascent chain degradation; RQC (ribosome quality control complex) is a ribosome-bound complex required for degradation of polypeptides arising from stalled translation; recruits alanine- and threonine-charged tRNA to the A site and directs the elongation of nascent chains independently of mRNA or 40S subunits; monitors translation stress and signals this to Hsf1p
	CAGL0A02695g	-1.30193454895986		Ortholog(s) have RNA polymerase III type 1 promoter sequence-specific DNA binding, RNA polymerase III type 2 promoter sequence-specific DNA binding, chromatin insulator sequence binding and tDNA binding, more	C1_10920W		Ortholog(s) have RNA polymerase III type 1 promoter sequence-specific DNA binding, RNA polymerase III type 2 promoter sequence-specific DNA binding, chromatin insulator sequence binding and tDNA binding, more	YDR362C	TFC6	Subunit of RNA polymerase III transcription initiation factor complex; one of six subunits of RNA polymerase III transcription initiation factor complex (TFIIIC); part of TFIIIC TauB domain that binds BoxB promoter sites of tRNA and other genes; cooperates with Tfc3p in DNA binding; human homolog is TFIIIC-110
	CAGL0L08360g	-1.27409224560973		Ortholog(s) have nascent polypeptide-associated complex binding activity, role in regulation of cytoplasmic translation, ribosome biogenesis and nascent polypeptide-associated complex, ribosome localization	C6_04180W		Putative metalloprotease; associates with ribosomes and is involved in ribosome biogenesis; Spider biofilm induced	YIL137C	TMA108	Ribosome-associated, nascent chain binding factor; binds N-terminal region of nascent peptides during translation; recognizes target proteins via its putative metallopeptidase peptide-binding pocket
	CAGL0M03883g	-1.27310052016761		Ortholog(s) have structural constituent of ribosome activity and mitochondrial small ribosomal subunit localization	C6_01980C		Mitochondrial ribosomal protein of the small subunit; S. cerevisiae ortholog is essential for viability; Spider biofilm repressed	YNL306W	MRPS18	Mitochondrial ribosomal protein of the small subunit; essential for viability, unlike most other mitoribosomal proteins
	CAGL0J06908g	-1.26187184118216		Ortholog(s) have mRNA binding activity, role in translational initiation and cytoplasm localization				YPL119C	DBP1	Putative ATP-dependent RNA helicase of the DEAD-box protein family; mutants show reduced stability of the 40S ribosomal subunit scanning through 5' untranslated regions of mRNAs; protein abundance increases in response to DNA replication stress; DBP1 has a paralog, DED1, that arose from the whole genome duplication
	CAGL0H03861g	-1.2489469298568		Ortholog(s) have mRNA binding, single-stranded telomeric DNA binding activity, role in nuclear mRNA surveillance, poly(A)+ mRNA export from nucleus, telomere maintenance and cytoplasmic stress granule, cytosol, nucleus localization	C7_00440C	GBP2	Putative single-strand telomeric DNA-binding protein; protein level decreases in stationary phase cultures; Spider biofilm repressed	YCL011C	GBP2	Poly(A+) RNA-binding protein; key surveillance factor for the selective export of spliced mRNAs from the nucleus to the cytoplasm; preference for intron-containing genes; similar to Npl3p; also binds single-stranded telomeric repeat sequence in vitro; relocalizes to the cytosol in response to hypoxia; GBP2 has a paralog, HRB1, that arose from the whole genome duplication
	CAGL0G07865g	-1.23874607897982		Ortholog(s) have RNA polymerase II core promoter sequence-specific DNA binding, RNA polymerase II transcription factor activity, TBP-class protein binding and involved in preinitiation complex assembly, more	C2_09300W	MED18	RNA polymerase II mediator complex subunit; rat catheter biofilm repressed	YGR104C	SRB5	Subunit of the RNA polymerase II mediator complex; associates with core polymerase subunits to form the RNA polymerase II holoenzyme; essential for transcriptional regulation; required for proper termination of transcription for some genes; involved in telomere maintenance
	CAGL0F01837g	-1.22284698484468	SPT8	Ortholog(s) have TBP-class protein binding, transcription cofactor activity	C5_02900W		Ortholog(s) have TBP-class protein binding, transcription cofactor activity	YLR055C	SPT8	Subunit of the SAGA transcriptional regulatory complex; not present in SAGA-like complex SLIK/SALSA; required for SAGA-mediated inhibition at some promoters
	CAGL0A03051g	-1.22267340766477		Ortholog(s) have RNA binding activity and role in mRNA splicing, via spliceosome, maturation of SSU-rRNA	CR_00240W	LSM6	Putative Lsm protein; flucytosine induced	YDR378C	LSM6	Lsm (Like Sm) protein; part of heteroheptameric complexes (Lsm2p-7p and either Lsm1p or 8p): cytoplasmic Lsm1p complex involved in mRNA decay; nuclear Lsm8p complex part of U6 snRNP and possibly involved in processing tRNA, snoRNA, and rRNA
	CAGL0L08734g	-1.22207787191228		Ortholog(s) have structural constituent of ribosome activity and mitochondrial small ribosomal subunit localization	C7_01020C		Ortholog(s) have structural constituent of ribosome activity and mitochondrial small ribosomal subunit localization	YPL013C	MRPS16	Mitochondrial ribosomal protein of the small subunit
	CAGL0K09086g	-1.21531453384227		Ortholog(s) have RNA binding activity, role in gene looping, mRNA polyadenylation, pre-mRNA cleavage required for polyadenylation, response to drug and cytosol, mRNA cleavage factor complex localization	C3_03840C		Putative cleavage factor I subunit; heterozygous null mutant exhibits hypersensitivity to parnafungin and cordycepin in the C. albicans fitness test	YOR250C	CLP1	Component of the cleavage and polyadenylation factor I (CF I); CF 1, composed of the CF 1A complex (Rna14p, Rna15p, Clp1p, Pcf11p) and Hrp1, is involved in cleavage and polyadenylation of mRNA 3' ends; involved in both the endonucleolyitc cleavage and polyadenylation steps of mRNA 3'-end maturation and in gene looping which affects reinitiation of transcription
	CAGL0D01342g	-1.21482323278459		Ortholog(s) have ubiquitin-protein transferase activity	C1_08300W	NOT5	Protein with similarity to S. cerevisiae Not5p, a member of the transcription regulatory CCR4-NOT complex; required for hyphal growth; antigenic during human oral infection; greater expression in yeast-form cells than hyphae	YPR072W	NOT5	Component of the CCR4-NOT core complex, involved in mRNA decapping; involved intranscription initiation and elongation and in mRNA degradation; conserved lysine in human homolog of Not5p and Not3p is mutated in cancers
	CAGL0A02112g	-1.21198281931973		Ortholog(s) have asparagine-tRNA ligase activity, role in asparaginyl-tRNA aminoacylation and cytosol localization	C7_03670W	DED81	Putative tRNA-Asn synthetase; genes encoding ribosomal subunits, translation factors, tRNA synthetases are downregulated upon phagocytosis by murine macrophage; protein enriched in stationary phase yeast cultures	YHR019C	DED81	Cytosolic asparaginyl-tRNA synthetase; required for protein synthesis, catalyzes the specific attachment of asparagine to its cognate tRNA
	CAGL0J08349g	-1.20182250371764		Ortholog(s) have role in regulation of transcription from RNA polymerase II promoter				YNL278W	CAF120	Part of the CCR4-NOT transcriptional regulatory complex; involved in controlling mRNA initiation, elongation, and degradation; contains a PH-like domain; CAF120 has a paralog, SKG3, that arose from the whole genome duplication
	CAGL0J11198g	-1.18590567354286		Ortholog(s) have structural constituent of ribosome activity and mitochondrial large ribosomal subunit localization	C4_03410W		Ortholog(s) have structural constituent of ribosome activity and mitochondrial large ribosomal subunit localization	YNL177C	MRPL22	Mitochondrial ribosomal protein of the large subunit
	CAGL0M07513g	-1.18223922941905		Ortholog(s) have structural constituent of ribosome activity and mitochondrial large ribosomal subunit localization	C1_07910C	MRPL3	Ribosomal protein of the large subunit, mitochondrial; repressed in core stress response; protein present in exponential and stationary growth phase yeast cultures	YMR024W	MRPL3	Mitochondrial ribosomal protein of the large subunit; located in close proximity to the polypeptide exit channel of the ribosome; mutations in human homolog MRPL44 cause childhood cardiomyopathy; human MRPL44 deficiency results in inefficient assembly of the mitochondrial ribosome, and in tissue-specific respiratory chain deficiency, manifesting as either Complex I+Complex IV or Complex IV defici…
	CAGL0C04807g	-1.17066927351699		Ortholog(s) have structural constituent of ribosome activity and mitochondrial small ribosomal subunit localization	C5_05250C		Ortholog(s) have structural constituent of ribosome activity and mitochondrial small ribosomal subunit localization	YJR113C	RSM7	Mitochondrial ribosomal protein of the small subunit; has similarity to E. coli S7 ribosomal protein
	CAGL0G10087g	-1.1700951236685		Ortholog(s) have role in nuclear-transcribed mRNA catabolic process, 3'-5' exonucleolytic nonsense-mediated decay, nuclear-transcribed mRNA catabolic process, non-stop decay and Ski complex, cytosol localization	C1_09830W	SKI3	Ortholog(s) have role in nuclear-transcribed mRNA catabolic process, 3'-5' exonucleolytic nonsense-mediated decay, nuclear-transcribed mRNA catabolic process, non-stop decay and Ski complex, cytosol localization	YPR189W	SKI3	Ski complex component and TPR protein; mediates 3'-5' RNA degradation by the cytoplasmic exosome; null mutants have superkiller phenotype of increased viral dsRNAs and are synthetic lethal with mutations in 5'-3' mRNA decay; mutations in the human ortholog, TTC37, causes Syndromic diarrhea/Trichohepatoenteric (SD/THE) syndrome
	CAGL0K09504g	-1.16486185483409		Ortholog(s) have ATPase activator activity, role in mRNA splicing, via spliceosome, positive regulation of ATPase activity and spliceosomal complex localization	CR_10430C		Ortholog(s) have ATPase activator activity, role in mRNA splicing, via spliceosome, positive regulation of ATPase activity and spliceosomal complex localization	YOR148C	SPP2	Essential protein that promotes the first step of splicing; required for the final stages of spliceosome maturation and activation; interacts with Prp2p, which may release Spp2p from the spliceosome following the first cleavage reaction; stimulates Prp2p ATPase activity
	CAGL0L13024g	-1.15529898897312		Ortholog(s) have role in RNA metabolic process and cytoplasmic stress granule, nucleus, ribosome localization	C7_02660C		Protein of unknown function that may function in RNA processing; filament induced	YHR121W	LSM12	Protein of unknown function that may function in RNA processing; interacts with Pbp1p and Pbp4p and associates with ribosomes; contains an RNA-binding LSM domain and an AD domain; GFP-fusion protein is induced by the DNA-damaging agent MMS; relative distribution to the nucleus increases upon DNA replication stress
	CAGL0C01435g	-1.14879201716181		Ortholog(s) have role in ribosome biogenesis and mitochondrion localization	C1_04820C		Ortholog(s) have role in ribosome biogenesis and mitochondrion localization	YPL183W-A	RTC6	Protein involved in translation; mutants have defects in biogenesis of nuclear ribosomes; sequence similar to prokaryotic ribosomal protein L36, may be a mitochondrial ribosomal protein; protein abundance increases in response to DNA replication stress
	CAGL0F02673g	-1.1432123782959		Ortholog(s) have DNA-directed 5'-3' RNA polymerase activity, RNA-directed 5'-3' RNA polymerase activity, single-stranded DNA binding, single-stranded RNA binding, translation initiation factor binding activity	C1_01570C	RPB7	Functional homolog of S. cerevisiae Rpb7; essential subunit of RNA Polymerase II; enhances hyperfilamentation of an S. cerevisiae rpb4 mutant; suppresses defects of S. cerevisiae rpb4 and ess1 mutants; Spider biofilm repressed	YDR404C	RPB7	RNA polymerase II subunit B16; forms dissociable heterodimer with Rpb4p; Rpb4/7 dissociates from RNAPII as Ser2 CTD phosphorylation increases; Rpb4/7 regulates cellular lifespan via mRNA decay process; involved in recruitment of 3'-end processing factors to transcribing RNA polymerase II complex, export of mRNA to cytoplasm under stress conditions; also involved in translation initiation
	CAGL0H02123g	-1.14159147678185		Ortholog(s) have mRNA binding activity, role in mRNA splice site selection, positive regulation of mRNA splicing, via spliceosome and U1 snRNP, U2-type prespliceosome, commitment complex, cytoplasm localization	C2_07520C		Ortholog(s) have mRNA binding activity, role in mRNA splice site selection, positive regulation of mRNA splicing, via spliceosome and U1 snRNP, U2-type prespliceosome, commitment complex, cytoplasm localization	YHR086W	NAM8	RNA binding protein, component of the U1 snRNP protein; mutants are defective in meiotic recombination and in formation of viable spores, involved in the formation of DSBs through meiosis-specific splicing of REC107 pre-mRNA; Nam8p regulon embraces the meiotic pre-mRNAs of REC107, HFM1, AMA1 SPO22 and PCH2; the putative RNA binding domains RRM2 and RRM3 are required for Nam8p meiotic function
	CAGL0A03927g	-1.14072196260447		Ortholog(s) have translation regulator activity and role in mitochondrial respiratory chain complex IV biogenesis, positive regulation of mitochondrial translation	CR_10010C	MSS51	Putative mRNA maturation factor; fungal-specific (no human or murine homolog)	YLR203C	MSS51	Specific translational activator for the mitochondrial COX1 mRNA; loosely associated with the matrix face of the mitochondrial inner membrane; localizes to vacuole membrane in response to H2O2; influences both COX1 mRNA translation and Cox1p assembly into cytochrome c oxidase; binds to heme B, which may be a mechanism for sensing oxygen levels in order to regulate cytochrome c oxidase biogenesis
	CAGL0L02233g	-1.1382832015056		Ortholog(s) have structural constituent of ribosome activity and mitochondrial large ribosomal subunit localization	C1_12280C		Putative mitochondrial ribosomal protein of the large subunit; Hap43-induced; mutants are viable; protein level decreases in stationary phase	YKR006C	MRPL13	Mitochondrial ribosomal protein of the large subunit; not essential for mitochondrial translation
	CAGL0K06391g	-1.13718632220681		Ortholog(s) have structural constituent of ribosome activity and cytosol, mitochondrial large ribosomal subunit, nucleus localization	C1_08520C		Ortholog(s) have structural constituent of ribosome activity and cytosol, mitochondrial large ribosomal subunit, nucleus localization	YDR462W	MRPL28	Mitochondrial ribosomal protein of the large subunit; protein abundance increases in response to DNA replication stress
	CAGL0E03520g	-1.13576196680437		Ortholog(s) have structural constituent of ribosome activity and mitochondrial large ribosomal subunit localization	C1_12610W		Ortholog(s) have structural constituent of ribosome activity and mitochondrial large ribosomal subunit localization	YLR312W-A	MRPL15	Mitochondrial ribosomal protein of the large subunit
	CAGL0G01584g	-1.13192641756422		Ortholog(s) have TFIIIC-class transcription factor binding activity	CR_01420W		Putative RNA polymerase III transcription factor (TFIIIB) subunit; flucytosine repressed	YNL039W	BDP1	Essential subunit of RNA polymerase III transcription factor (TFIIIB); TFIIIB is involved in transcription of genes encoding tRNAs, 5S rRNA, U6 snRNA, and other small RNAs
	CAGL0A02090g	-1.12664870507579		Ortholog(s) have proline-tRNA ligase activity, role in prolyl-tRNA aminoacylation and cytosol, ribosome localization	C7_03660C		Protein with similarity to amino acid-tRNA ligase; stationary phase enriched protein; GlcNAc-induced protein	YHR020W	YHR020W	Prolyl-tRNA synthetase; N-terminal domain shows weak homology to prokaryotic posttransfer editing domain, but does not possess posttransfer editing activity; may interact with ribosomes, based on co-purification experiments
	CAGL0M05797g	-1.12659555193978		Ortholog(s) have pseudouridine synthase activity, role in mRNA pseudouridine synthesis, tRNA pseudouridine synthesis and mitochondrion localization				YGL063W	PUS2	Mitochondrial tRNA:pseudouridine synthase; acts at positions 27 and 28, but not at position 72; efficiently and rapidly targeted to mitochondria, specifically dedicated to mitochondrial tRNA modification; mutation also affects pseudouridylation of some nuclear-encoded mRNAs; PUS2 has a paralog, PUS1, that arose from the whole genome duplication
	CAGL0J10406g	-1.11193395627355		Ortholog(s) have enzyme activator activity, phosphatidylinositol-3,5-bisphosphate binding, phosphatidylinositol-3-phosphate binding, tRNA binding activity	CR_03060W	ARC1	Putative G4 nucleic acid binding protein; macrophage/pseudohyphal-repressed; protein enriched in stationary phase yeast-form cultures; Spider biofilm repressed	YGL105W	ARC1	Protein that binds tRNA and methionyl- and glutamyl-tRNA synthetases; involved in tRNA delivery, stimulating catalysis, and ensuring localization; also binds quadruplex nucleic acids; protein abundance increases in response to DNA replication stress; methionyl-tRNA synthetase is Mes1p; glutamyl-tRNA synthetase is Gus1p
	CAGL0M07051g	-1.11175028563882		Has domain(s) with predicted RNA binding, ribonuclease activity
	CAGL0E00561g	-1.11145393697031		Ortholog(s) have histone binding, histone deacetylase binding, mediator complex binding, phosphatidylinositol-3,5-bisphosphate binding, transcriptional repressor activity, RNA polymerase II transcription factor binding activity	C1_00060W	TUP1	Transcriptional corepressor; represses filamentous growth; regulates switching; role in germ tube induction, farnesol response; in repression pathways with Nrg1, Rfg1; farnesol upregulated in biofilm; rat catheter, Spider biofilm repressed	YCR084C	TUP1	General repressor of transcription; forms complex with Cyc8p, involved in the establishment of repressive chromatin structure through interactions with histones H3 and H4, appears to enhance expression of some genes
	CAGL0B03333g	-1.11139179375208		Ortholog(s) have RNA polymerase II C-terminal domain phosphoserine binding, chromatin binding, transcription factor activity and RNA polymerase II core promoter sequence-specific, more	C2_08630C		Ortholog(s) have RNA polymerase II C-terminal domain phosphoserine binding, chromatin binding, transcription factor activity and RNA polymerase II core promoter sequence-specific, more	YBR279W	PAF1	Component of the Paf1p complex involved in transcription elongation; binds to and modulates the activity of RNA polymerases I and II; required for expression of a subset of genes, including cell cycle-regulated genes; involved in SER3 repression by helping to maintain SRG1 transcription-dependent nucleosome occupancy; homolog of human PD2/hPAF1
	CAGL0H01199g	-1.07848310274922		Ortholog(s) have eukaryotic translation initiation factor 2alpha kinase activity, tRNA binding activity	C7_01330C	GCN2	Translation initiation factor 2-alpha (eIF2alpha) kinase; has nonessential role in amino acid starvation response, in contrast to S. cerevisiae homolog; similar to S. cerevisiae Gcn2p	YDR283C	GCN2	Protein kinase; phosphorylates the alpha-subunit of translation initiation factor eIF2 (Sui2p) in response to starvation; activated by uncharged tRNAs and the Gcn1p-Gcn20p complex; contributes to DNA damage checkpoint control
	CAGL0I09636g	-1.0686270370179		Has domain(s) with predicted RNA binding, double-stranded RNA binding, ribonuclease III activity and role in RNA processing
	CAGL0F00429g	-1.04911149883258		Ortholog(s) have GTP diphosphatase activity, ITP diphosphatase activity, UTP diphosphatase activity, XTP diphosphatase activity, dATP pyrophosphohydrolase activity and dCTP diphosphatase activity, more	C5_03860W	HAM1	Putative deoxyribonucleoside triphosphate pyrophosphohydrolase; caspofungin repressed; regulated by Gcn2p and Gcn4p	YJR069C	HAM1	Nucleoside triphosphate pyrophosphohydrolase; active against various substrates including ITP, dITP and XTP; mediates exclusion of non canonical purines, pyrimidines from dNTP pools; functions with YJL055W to mediate resistance to 5-FU; specifically reduces the incorporation of 5-FU into RNA without affecting uptake or incorporation of uracil into RNA; protein abundance increases in response to D…
	CAGL0E00451g	-1.04109690033433		Ortholog(s) have ATPase activator activity	C6_04270W	CDC39	Protein similar to S. cerevisiae Cdc39p, which is part of the CCR4-NOT transcription regulatory complex; transposon mutation affects filamentous growth	YCR093W	CDC39	Subunit of the CCR4-NOT1 core complex; this complex has multiple roles in the regulation of mRNA levels including regulation of transcription and destabilization of mRNA by deadenylation; basal transcription factor that increases initiation and elongation; activates the ATPase activity of Dhh1p, resulting in processing body disassembly
	CAGL0E06490g	-1.02971972363182		Ortholog(s) have role in positive regulation of RNA polymerase II transcriptional preinitiation complex assembly, positive regulation of protein catabolic process and proteasome regulatory particle assembly, more	C1_05240C	RPT1	Putative 26S proteasome regulatory subunit 7; Hap43p-repressed gene; regulated by Gcn2p and Gcn4p; overlaps orf19.442	YKL145W	RPT1	ATPase of the 19S regulatory particle of the 26S proteasome; one of six ATPases of the regulatory particle; involved in the degradation of ubiquitinated substrates; required for optimal CDC20 transcription; interacts with Rpn12p and Ubr1p; mutant has aneuploidy tolerance
	CAGL0J01397g	-1.02393517857824		Ortholog of S. cerevisiae : YMR087W, C. albicans SC5314 : C1_04160C_A, C. dubliniensis CD36 : Cd36_03920, C. parapsilosis CDC317 : CPAR2_107150 and Pichia stipitis Pignal : PICST_61741	C1_04160C		Ortholog of S. cerevisiae : YMR087W, C. glabrata CBS138 : CAGL0J01397g, C. dubliniensis CD36 : Cd36_03920, C. parapsilosis CDC317 : CPAR2_107150 and Pichia stipitis Pignal : PICST_61741	YMR087W	YMR087W	Putative ADP-ribose-1''-monophosphatase; converts ADP-ribose-1''-monophosphate to ADP-ribose; may have a role in tRNA splicing; contains an A1pp domain
	CAGL0J02838g	-1.02016615260175		Ortholog(s) have structural constituent of ribosome activity and mitochondrial small ribosomal subunit localization	C1_04370C		Ortholog(s) have structural constituent of ribosome activity and mitochondrial small ribosomal subunit localization	YER050C	RSM18	Mitochondrial ribosomal protein of the small subunit; has similarity to E. coli S18 ribosomal protein
	CAGL0I10989g	-1.01547528902567		Ortholog(s) have rRNA (guanine-N1-)-methyltransferase activity, role in rRNA modification and endoplasmic reticulum, mitochondrion localization	C2_04820W		Ortholog(s) have rRNA (guanine-N1-)-methyltransferase activity, role in rRNA modification and endoplasmic reticulum, mitochondrion localization	YOR201C	MRM1	Ribose methyltransferase; modifies a functionally critical, conserved nucleotide in mitochondrial 21S rRNA
	CAGL0I03476g	-1.00994060019861		Ortholog(s) have chromatin binding, mRNA binding, translation regulator activity, nucleic acid binding activity	C1_07070C	DHH1	Putative RNA helicase	YDL160C	DHH1	Cytoplasmic DEAD-box helicase, stimulates mRNA decapping; coordinates distinct steps in mRNA function and decay, interacting with both decapping and deadenylase complexes; role in translational repression, mRNA decay, and possibly mRNA export; interacts and cooperates with Ngr1p to promote specific mRNA decay; ATP- and RNA-bound form promotes processing body (PB) assembly, while ATPase stimulatio…
	CAGL0K07029g	1.0137094295432		Ortholog(s) have RNA-dependent ATPase activity and nucleus localization	C3_06720W	PRP5	Putative pre-mRNA processing RNA-helicase; induced upon adherence to polystyrene; rat catheter and Spider biofilm induced	YBR237W	PRP5	RNA helicase in the DEAD-box family; necessary for prespliceosome formation, bridges U1 and U2 snRNPs and enables stable U2 snRNP association with intron RNA
	CAGL0G01606g	1.01540075510566		Ortholog(s) have Ser-tRNA(Ala) hydrolase activity and cytoplasm localization	C1_12240C		Predicted alanine-tRNA ligase; oxidative stress-induced via Cap1	YNL040W	YNL040W	Protein of unknown function; has strong similarity to alanyl-tRNA synthases from Eubacteria; null mutant displays decreased translation rate and increased readthrough of premature stop codons; green fluorescent protein (GFP)-fusion protein localizes to the cytoplasm; YNL040W is not an essential gene
	CAGL0J07744g	1.02182838437125		Ortholog(s) have cysteine-tRNA ligase activity, role in cysteinyl-tRNA aminoacylation and cytosol, ribosome localization	C1_13030C		Putative tRNA-Cys synthetase; induced by alpha pheromone in SpiderM medium; ribosomal subunits, translation factors, tRNA synthetases are downregulated upon phagocytosis by murine macrophage	YNL247W	YNL247W	Cysteinyl-tRNA synthetase; may interact with ribosomes, based on co-purification experiments; human gene CARS allows growth of the yeast haploid null mutant after sporulation of a heterozygous diploid
	CAGL0G03069g	1.02310664591426		Ortholog(s) have RNA lariat debranching enzyme activator activity, role in mRNA splicing, via spliceosome and cytosol, nucleus localization	C1_02090C		Predicted debranching enzyme-associated ribonuclease; rat catheter biofilm induced	YGR093W	DRN1	Splicing factor that modulates turnover of branched RNAs by Dbr1p; interacts with spliceosomal components and branched RNA splicing products; enhances Dbr1p debranching in vitro; conserved protein with domain organization identical from yeast to human; N-terminal homology to Dbr1p N-terminus, but Dbr1p catalytic residues not conserved; relocalizes to the cytosol in response to hypoxia
	CAGL0L10978g	1.0305024585887		Ortholog(s) have role in negative regulation of translation, positive regulation of cytoplasmic mRNA processing body assembly and cytoplasm, mRNA cap binding complex localization	C1_09350W		Putative eIF-4E-binding repressor of CAP-dependent translation; stationary phase enriched protein	YOR276W	CAF20	Phosphoprotein of the mRNA cap-binding complex; involved in translational control; repressor of cap-dependent translation initiation; competes with eIF4G for binding to eIF4E
	CAGL0L05896g	1.03951411754708		Ortholog(s) have role in cellular bud site selection, mRNA export from nucleus, mRNA splicing, via spliceosome and RES complex, U2-type spliceosomal complex, cytosol localization	C1_13380W		Ortholog(s) have role in cellular bud site selection, mRNA export from nucleus, mRNA splicing, via spliceosome and RES complex localization	YGL174W	BUD13	Subunit of the RES complex; RES complex is required for nuclear pre-mRNA retention and splicing; involved in bud-site selection; diploid mutants display a unipolar budding pattern instead of the wild-type bipolar pattern due to a specific defect in MATa1 pre-mRNA splicing which leads to haploid gene expression in diploids
	CAGL0H00957g	1.04610755898303		Ortholog(s) have mRNA binding, translation initiation factor activity, translation initiation factor binding activity and role in formation of translation preinitiation complex	C7_04130C	SUI3	Putative translation initiation factor; genes encoding ribosomal subunits, translation factors, and tRNA synthetases are downregulated upon phagocytosis by murine macrophage	YPL237W	SUI3	Beta subunit of the translation initiation factor eIF2; involved in the identification of the start codon; proposed to be involved in mRNA binding
	CAGL0M11836g	1.04756316034644		Ortholog(s) have RNA binding, ribonuclease MRP activity, ribonuclease P activity	C3_02840W		Ortholog(s) have RNA binding, ribonuclease MRP activity, ribonuclease P activity	YAL033W	POP5	Subunit of both RNase MRP and nuclear RNase P; RNase MRP cleaves pre-rRNA, while nuclear RNase P cleaves tRNA precursors to generate mature 5' ends and facilitates turnover of nuclear RNAs
	CAGL0F00473g	1.05167291347921		Ortholog(s) have role in ribosomal large subunit biogenesis, translational initiation and cytoplasm, nucleus localization	C7_00800C	YAE1	Ortholog(s) have role in ribosomal large subunit biogenesis, translational initiation and cytoplasm, nucleus localization	YJR067C	YAE1	Protein that forms a complex with Lto1p and Rli1p; essential for growth under standard (aerobic) conditions but not under anaerobic conditions; may have a role in protection of ribosomal assembly and function from damage due to reactive oxygen species
	CAGL0L03245g	1.05930020923954		Ortholog(s) have chromatin DNA binding activity and role in positive regulation of transcription from RNA polymerase II promoter, tRNA modification, tRNA threonylcarbamoyladenosine metabolic process, telomere maintenance via recombination	C4_04920W		Ortholog(s) have chromatin DNA binding activity and role in positive regulation of transcription from RNA polymerase II promoter, tRNA modification, tRNA threonylcarbamoyladenosine metabolic process, telomere maintenance via recombination	YKR038C	KAE1	Highly conserved ATPase of HSP70/DnaK family; essential functional component of the EKC/KEOPS complex, with Bud32p, Cgi121p, Pcc1p, and Gon7p; EKC/KEOPS complex is required for t6A tRNA modification and telomeric TG1-3 recombination; may have role in transcription
	CAGL0H08954g	1.06322139129702		Ortholog(s) have rRNA (uridine-2'-O-)-methyltransferase activity, role in rRNA methylation and mitochondrion localization	CR_10260W		Putative mitochondrial 2' O-ribose methyltransferase; predicted role in methylation of U(2791) in 21S rRNA; Spider biofilm induced	YGL136C	MRM2	Mitochondrial 2' O-ribose methyltransferase; required for methylation of U(2791) in 21S rRNA; MRM2 deletion confers thermosensitive respiration and loss of mitochondrial DNA; has similarity to Spb1p and Trm7p, and to E. coli FtsJ/RrmJ
	CAGL0A02189g	1.07240010099643		Ortholog(s) have role in mitochondrial translation and cytosol, mitochondrion localization				YHR091C	MSR1	Mitochondrial arginyl-tRNA synthetase; mutations in human ortholog are associated with pontocerebellar hypoplasia type 6; MSR1 has a paralog, YDR341C, that arose from the whole genome duplication
	CAGL0M09691g	1.0751089485809		Ortholog(s) have nucleocytoplasmic transporter activity, phospholipid binding, single-stranded DNA binding activity				YMR153W	NUP53	FG-nucleoporin component of central core of nuclear pore complex (NPC); also part of the NPC nuclear basket; contributes directly to nucleocytoplasmic transport; involved in regulation of transcription and mitosis; induces membrane tubulation, which may contribute to nuclear pore assembly; NUP53 has a paralog, ASM4, that arose from the whole genome duplication
	CAGL0G00374g	1.07551153010625		Ortholog(s) have 3'-5'-exoribonuclease activity	C1_07090C		Ortholog(s) have 3'-5'-exoribonuclease activity	YGR276C	RNH70	3'-5' exoribonuclease; required for maturation of 3' ends of 5S rRNA and tRNA-Arg3 from dicistronic transcripts
	CAGL0I00814g	1.07906753721192		Has domain(s) with predicted structural constituent of ribosome activity, role in translational elongation and ribosome localization
	CAGL0I09570g	1.091421293931		Ortholog(s) have mRNA guanylyltransferase activity, role in 7-methylguanosine mRNA capping, positive regulation of transcription from RNA polymerase II promoter, tRNA processing and mRNA cap methyltransferase complex localization	C4_05760W	CGT1	mRNA 5' guanylyltransferase; small subunit of mRNA capping enzyme; binds an RNA Pol II C-terminal domain peptide; Cet1p and Cgt1p form a 2:1 complex; functional homolog of S. cerevisiae Ceg1p	YGL130W	CEG1	Guanylyltransferase involved in mRNA 5' capping; subunit of mRNA capping enzyme, which is a heterotetramer composed of two molecules of Ceg1p and a homodimer of Cet1p, the mRNA 5'-triphosphatase subunit; nuclear import of Ceg1p requires interaction with Cet1p; mammalian capping enzyme is a single bifunctional polypeptide; human homolog RNGTT can complement yeast ceg1 null mutant
	CAGL0K05313g	1.09268265014096		Ortholog(s) have aminoacyl-tRNA ligase activity, mRNA binding activity, role in histidyl-tRNA aminoacylation, mitochondrial translation and cytosol, mitochondrion localization	C5_05490C	HTS1	Putative tRNA-His synthetase; downregulated upon phagocytosis by murine macrophage; stationary phase enriched protein; Spider biofilm repressed	YPR033C	HTS1	Cytoplasmic and mitochondrial histidine tRNA synthetase; efficient mitochondrial localization requires both a presequence and an amino-terminal sequence; mutations in human ortholog HARS2 are associated with Perrault syndrome
	CAGL0C01331g	1.09363741233519		Ortholog(s) have protein-histidine N-methyltransferase activity, role in peptidyl-histidine methylation, to form tele-methylhistidine and cytosol, nucleus localization	C1_09040C		Putative protein-histidine N-methyltransferase; Spider biofilm induced	YIL110W	HPM1	AdoMet-dependent methyltransferase; involved in a novel 3-methylhistidine modification of ribosomal protein Rpl3p; seven beta-strand MTase family member; null mutant exhibits a weak vacuolar protein sorting defect and caspofungin resistance
	CAGL0G07557g	1.10891785014277		Ortholog(s) have RNA polymerase I upstream control element sequence-specific DNA binding, transcription factor activity, RNA polymerase I upstream control element sequence-specific binding activity				YOR295W	UAF30	Subunit of UAF (upstream activation factor) complex; UAF is an RNA polymerase I specific transcription stimulatory factor composed of Uaf30p, Rrn5p, Rrn9p, Rrn10p, histones H3 and H4; targeting factor for the UAF that facilitates activation of many rDNA genes; deletion decreases cellular growth rate; UAF30 has a paralog, TRI1, that arose from the whole genome duplication
	CAGL0L04532g	1.11364486523308		Ortholog(s) have glutamine-tRNA ligase activity, mRNA binding activity, role in glutaminyl-tRNA aminoacylation and cytosol, mitochondrion localization	C7_00550C	GLN4	Putative tRNA-Gln synthetase; genes encoding ribosomal subunits, translation factors, tRNA synthetases are downregulated upon phagocytosis by murine macrophage; protein present in exponential and stationary growth phase yeast cultures	YOR168W	GLN4	Glutamine tRNA synthetase; monomeric class I tRNA synthetase that catalyzes the specific glutaminylation of tRNA(Gln); N-terminal domain proposed to be involved in enzyme-tRNA interactions
	CAGL0M12639g	1.119359762588		Ortholog(s) have protein-lysine N-methyltransferase activity, role in peptidyl-lysine dimethylation, peptidyl-lysine monomethylation, vesicle-mediated transport and cytosol, nucleus localization	C2_05520W		Ortholog(s) have protein-lysine N-methyltransferase activity, role in peptidyl-lysine dimethylation, peptidyl-lysine monomethylation, vesicle-mediated transport and cytosol, nucleus localization	YIL064W	EFM4	Lysine methyltransferase; involved in the dimethylation of eEF1A (Tef1p/Tef2p) at lysine 316; sequence similarity to S-adenosylmethionine-dependent methyltransferases of the seven beta-strand family; role in vesicular transport
	CAGL0G05005g	1.12795018352709		Ortholog(s) have role in nuclear-transcribed mRNA catabolic process, nonsense-mediated decay and cytoplasm, nucleus localization	C2_02090W		Ortholog(s) have role in nuclear-transcribed mRNA catabolic process, nonsense-mediated decay and cytoplasm, nucleus localization	YLR363C	NMD4	Protein that may be involved in nonsense-mediated mRNA decay; interacts with Nam7p, relocalizes from nucleus to cytoplasmic foci upon DNA replication stress
	CAGL0D06336g	1.13665554146114		Ortholog(s) have tRNA methyltransferase activity, role in tRNA methylation, wybutosine biosynthetic process and cytosol, nucleus localization	CR_03160W		Ortholog(s) have tRNA methyltransferase activity, role in tRNA methylation, wybutosine biosynthetic process and cytosol, nucleus localization	YGL050W	TYW3	tRNA methyltransferase required for synthesis of wybutosine; a modified guanosine found at the 3'-position adjacent to the anticodon of phenylalanine tRNA which supports reading frame maintenance by stabilizing codon-anticodon interactions
	CAGL0B02123g	1.14216767915182		Ortholog(s) have RNA binding, translation regulator activity and role in Group I intron splicing, mitochondrial respiratory chain complex IV biogenesis, positive regulation of mitochondrial translation	C4_05360C		Ortholog(s) have RNA binding, translation regulator activity and role in Group I intron splicing, mitochondrial respiratory chain complex IV biogenesis, positive regulation of mitochondrial translation	YGR222W	PET54	Mitochondrial inner membrane protein; binds to the 5' UTR of the COX3 mRNA to activate its translation together with Pet122p and Pet494p; also binds to the COX1 Group I intron AI5 beta to facilitate exon ligation during splicing
	CAGL0D03718g	1.15198170268843	TIF5	Translation initiation factor eIF5
	CAGL0L00517g	1.15542402407227		Mass spectrometry data support an N-terminal extension of this ORF	C7_04150W		Putative protein of unknown function; Hap43p-repressed gene; ortholog of S. cerevisiae YMR185W	YMR185W	RTP1	Protein required for the nuclear import and biogenesis of RNA pol II; conflicting evidence on whether null mutant is viable with elongated buds, or inviable; interacts with Rpb2, Rpb3, Nup116p, Nup100p and components of the R2TP complex (Rvb1p, Rvb2p, Pih1p); similar to human TMCO7 gene
	CAGL0K02937g	1.16248394509626		Ortholog(s) have tRNA threonylcarbamoyladenosine dehydratase activity, role in cyclic threonylcarbamoyladenosine biosynthetic process and mitochondrial outer membrane localization				YHR003C	TCD1	tRNA threonylcarbamoyladenosine dehydratase; required for the ct6A tRNA base modification, where an adenosine at position 37 is modified to form a cyclized active ester with an oxazolone ring; localized to the mitochondrial outer membrane; TCD1 has a paralog, TCD2, that arose from the whole genome duplication
	CAGL0G00748g	1.16297447740921		Ortholog(s) have tRNA-intron endonuclease activity, role in tRNA-type intron splice site recognition and cleavage and mitochondrial outer membrane, tRNA-intron endonuclease complex localization	C2_05670C		Ortholog(s) have tRNA-intron endonuclease activity, role in tRNA-type intron splice site recognition and cleavage and mitochondrial outer membrane, tRNA-intron endonuclease complex localization	YAR008W	SEN34	Subunit of the tRNA splicing endonuclease; tRNA splicing endonuclease (Sen complex) is composed of Sen2p, Sen15p, Sen34p, and Sen54p; Sen complex also cleaves the CBP1 mRNA at the mitochondrial surface; Sen34p contains the active site for tRNA 3' splice site cleavage and has similarity to Sen2p and to Archaeal tRNA splicing endonuclease
	CAGL0H01595g	1.16644870461499		Ortholog(s) have role in transcription from RNA polymerase II promoter and cytoplasm localization	C5_01430C		Protein wth a predicted role in transcription from RNA polymerase II promoters; Spider biofilm induced	YDR527W	RBA50	Protein involved in transcription; interacts with RNA polymerase II subunits Rpb2p, Rpb3, and Rpb11p; has similarity to human RPAP1
	CAGL0J09988g	1.20009172828445		Ortholog(s) have S-adenosylmethionine-dependent methyltransferase activity, role in translational readthrough and mitochondrion localization	CR_04150W		Ortholog(s) have S-adenosylmethionine-dependent methyltransferase activity, role in translational readthrough and mitochondrion localization	YNL063W	MTQ1	S-adenosylmethionine-dependent methyltransferase; methylates translational release factor Mrf1p; similar to E.coli PrmC; is not an essential gene
	CAGL0H04697g	1.20737782739856		Ortholog(s) have RNA polymerase I core binding, RNA polymerase I transcription factor binding, RNA polymerase II core binding, mRNA binding, rRNA binding and single-stranded RNA binding, more	C2_01480W	SPT5	Protein similar to S. cerevisiae Spt5p transcription elongation factor; transposon mutation affects filamentous growth	YML010W	SPT5	Spt4p/5p (DSIF) transcription elongation factor complex subunit; the Spt4/5 complex binds to ssRNA in a sequence-specific manner, and in concert with RNAP I and II has multiple roles regulating transcriptional elongation, RNA processing, quality control, and transcription-coupled repair; interacts with DNA upstream of RNAPII and the non-template strand of the transcription bubble; Spt5p is the on…
	CAGL0H07931g	1.22542705188628		Ortholog(s) have RNA binding activity, role in tRNA modification and cytoplasm, nucleus localization	C7_03990C		Ortholog(s) have RNA binding activity, role in tRNA modification and cytoplasm, nucleus localization	YGL232W	TAN1	Putative tRNA acetyltransferase; RNA-binding protein required for the formation of the modified nucleoside N(4)-acetylcytidine in serine and leucine tRNAs but not required for the same modification in 18S rRNA; protein abundance increases in response to DNA replication stress
	CAGL0M04411g	1.22561197419794		Ortholog(s) have S-adenosylmethionine-dependent methyltransferase activity and role in protein methylation	C2_02360C		Ortholog(s) have S-adenosylmethionine-dependent methyltransferase activity, role in protein methylation and cytosol, nucleus localization	YLR137W	RKM5	Protein lysine methyltransferase; monomethylates Lys-46 of the ribosomal large subunit Rpl1a/Rpl1b; member of the seven beta-strand methyltransferase superfamily; orthologs only found among fungal species
	CAGL0I02266g	1.23014325279422		Ortholog(s) have U1 snRNA binding, U2 snRNA binding, U5 snRNA binding, U6 snRNA binding, mRNA binding, pre-mRNA intronic binding, second spliceosomal transesterification activity	CR_08660W	PRP8	Protein similar to S. cerevisiae Prp8, a component of the U4/U6-U5 snRNP complex; repressed by alpha pheromone in SpiderM medium	YHR165C	PRP8	Component of U4/U6-U5 snRNP complex; involved in second catalytic step of splicing; participates in spliceosomal assembly through its interaction with U1 snRNA; largest and most evolutionarily conserved protein of the spliceosome; mutations in human ortholog, PRPF8, cause Retinitis pigmentosa and missplicing in Myelodysplastic syndrome; mouse ortholog interacts with androgen receptor and may have…
	CAGL0K11374g	1.23310854533895		Ortholog(s) have RNA polymerase II core binding, mRNA binding activity and role in mRNA polyadenylation, pre-mRNA cleavage required for polyadenylation, response to drug, termination of RNA polymerase II transcription	C6_01920C		Putative transcription factor with zinc finger DNA-binding motif; heterozygous null mutant exhibits hypersensitivity to parnafungin and cordycepin in the C. albicans fitness test	YDR228C	PCF11	mRNA 3' end processing factor; essential component of cleavage and polyadenylation factor IA (CF IA), involved in pre-mRNA 3' end processing and in transcription termination; binds C-terminal domain of largest subunit of RNA pol II (Rpo21p); required for gene looping; relocalizes to the cytosol in response to hypoxia
	CAGL0M05863g	1.24125118697782		Ortholog(s) have RNA polymerase II core binding, TFIIH-class transcription factor binding, single-stranded DNA binding activity and role in transcription from RNA polymerase II promoter	C1_10120C		TFIIE small subunit; involved in RNA polymerase II transcription initiation; Spider biofilm induced	YKR062W	TFA2	TFIIE small subunit; involved in RNA polymerase II transcription initiation
	CAGL0F04961g	1.24475708170846	SMD2	Ortholog(s) have Prp19 complex, U1 snRNP, U2 snRNP, post-mRNA release spliceosomal complex localization
	CAGL0D02772g	1.2635016079422		Ortholog(s) have ubiquitin-protein transferase activity, role in generation of catalytic spliceosome for first transesterification step and Prp19 complex, U2-type catalytic step 1 spliceosome, cytosol, mitochondrion localization	C3_07480W		Ortholog(s) have ubiquitin-protein transferase activity and role in generation of catalytic spliceosome for first transesterification step	YLL036C	PRP19	Splicing factor associated with the spliceosome; contains a U-box, a motif found in a class of ubiquitin ligases, and a WD40 domain; relocalizes to the cytosol in response to hypoxia
	CAGL0I01430g	1.27307104678411		Ortholog(s) have cytosol, nucleolus localization				YJR047C	ANB1	Translation elongation factor eIF-5A; previously thought to function in translation initiation; undergoes an essential hypusination modification; expressed under anaerobic conditions; ANB1 has a paralog, HYP2, that arose from the whole genome duplication; human EIF5A complements the inviability of the yeast hyp2 anb1 double null mutant
	CAGL0D00440g	1.3000716940949		Ortholog(s) have role in poly(A)+ mRNA export from nucleus, ribosomal large subunit export from nucleus, ribosomal small subunit export from nucleus and nuclear RNA export factor complex, nuclear pore localization	C2_10640C	MTR2	Nuclear export protein; member of NTF2 family; monomeric in solution; interacts with Mex67p via the NTF2-like domain	YKL186C	MTR2	mRNA transport regulator; essential nuclear protein; Mex67p and Mtr2p form a mRNA export complex which binds to RNA
	CAGL0K10098g	1.3092332836937		Ortholog(s) have role in nucleotide-excision repair, phosphorylation of RNA polymerase II C-terminal domain, transcription from RNA polymerase II promoter and core TFIIH complex, cytosol, holo TFIIH complex localization	C1_07280C		Ortholog(s) have role in nucleotide-excision repair, phosphorylation of RNA polymerase II C-terminal domain, transcription from RNA polymerase II promoter and core TFIIH complex, cytosol, holo TFIIH complex localization	YDR079C-A	TFB5	Component of RNA polymerase II general transcription factor TFIIH; involved in transcription initiation and in nucleotide-excision repair; relocalizes to the cytosol in response to hypoxia; homolog of Chlamydomonas reinhardtii REX1-S protein involved in DNA repair
	CAGL0I06941g	1.32112125756514		Ortholog(s) have mRNA binding activity, role in deadenylation-dependent decapping of nuclear-transcribed mRNA, positive regulation of translation in response to stress and cytoplasm, nucleus localization				YGL222C	EDC1	RNA-binding protein that activates mRNA decapping directly; binds to mRNA substrate and enhances activity of decapping proteins Dcp1p and Dcp2p; has a role in translation during heat stress; protein becomes more abundant and forms cytoplasmic foci in response to DNA replication stress; EDC1 has a paralog, EDC2, that arose from the whole genome duplication
	CAGL0F02475g	1.33104984109165		Ortholog(s) have RNA binding activity, role in mRNA splicing, via spliceosome and U2-type prespliceosome localization	C4_01280C		Ortholog(s) have RNA binding activity, role in mRNA splicing, via spliceosome and U2 snRNP, U2-type prespliceosome localization	YJL203W	PRP21	Subunit of the SF3a splicing factor complex; required for spliceosome assembly
	CAGL0L11220g	1.33283298928207		Ortholog(s) have nucleic acid binding, protein complex scaffold activity and role in DNA recombination, mRNA export from nucleus, transcription elongation from RNA polymerase II promoter				YML062C	MFT1	Subunit of the THO complex; THO is a nuclear complex comprised of Hpr1p, Mft1p, Rlr1p, and Thp2p, that is involved in transcription elongation and mitotic recombination; involved in telomere maintenance
	CAGL0L05962g	1.35630367636523		Ortholog(s) have mRNA binding, protein binding, bridging activity	C1_13570W	MPT5	Putative RNA-binding protein; Hap43p-repressed gene; protein induced during the mating process	YGL178W	MPT5	mRNA-binding protein of the PUF family; binds to specific mRNAs, often in the 3' UTR; has broad specificity and binds to more than 1000 mRNAs (16% of the transcriptome); recruits the CCR4-NOT deadenylase complex to mRNAs along with Dhh1p and Dcp1p to promote deadenylation, decapping, and decay; also interacts with the Caf20p translational initiation repressor, affecting its mRNA target specificity
	CAGL0C02497g	1.35880905394403		Ortholog(s) have role in mRNA splicing, via spliceosome and U1 snRNP, U2 snRNP, U2-type prespliceosome, U4/U6 x U5 tri-snRNP complex, U5 snRNP, cytosol, post-mRNA release spliceosomal complex localization	CR_07510W		Ortholog(s) have role in mRNA splicing, via spliceosome and U1 snRNP, U2 snRNP, U2-type prespliceosome, U4/U6 x U5 tri-snRNP complex, U5 snRNP, cytosol, post-mRNA release spliceosomal complex localization	YER029C	SMB1	Core Sm protein Sm B; part of heteroheptameric complex (with Smd1p, Smd2p, Smd3p, Sme1p, Smx3p, and Smx2p) that is part of the spliceosomal U1, U2, U4, and U5 snRNPs; homolog of human Sm B and Sm B'
	CAGL0B01881g	1.36353538386198		Ortholog(s) have tRNA (guanine-N2-)-methyltransferase activity, role in tRNA N2-guanine methylation and mitochondrion, nuclear inner membrane localization	CR_00900W	TRM1	Putative N2,N2-dimethylguanine tRNA methyltransferase; induced upon adherence to polystyrene	YDR120C	TRM1	tRNA methyltransferase; two forms of protein are made by alternative translation starts; localizes to both nucleus and mitochondrion to produce modified base N2,N2-dimethylguanosine in tRNAs in both compartments; nuclear Trm1p is evenly distributed around inner nuclear membrane in WT, but mislocalizes as puncta near ER-nucleus junctions in spindle pole body (SPB) mutants; both Trm1p inner nuclear…
	CAGL0J00737g	1.38126951927512		Ortholog(s) have structural constituent of ribosome activity	CR_07630C	RPS27	Putative ribosomal protein; repressed upon phagocytosis by murine macrophage; Spider biofilm repressed	YHR021C	RPS27B	Protein component of the small (40S) ribosomal subunit; homologous to mammalian ribosomal protein S27, no bacterial homolog; RPS27B has a paralog, RPS27A, that arose from the whole genome duplication
	CAGL0D02002g	1.38515900045895		Ortholog(s) have RNA polymerase II carboxy-terminal domain kinase activity, cyclin-dependent protein serine/threonine kinase activity	C3_02260C		Putative kinase subunit of RNA polymerase II carboxy-terminal domain kinase I; possibly an essential gene, disruptants not obtained by UAU1 method	YKL139W	CTK1	Catalytic (alpha) subunit of C-terminal domain kinase I (CTDK-I); phosphorylates both RNA pol II subunit Rpo21p to affect transcription and pre-mRNA 3' end processing, and ribosomal protein Rps2p to increase translational fidelity; required for H3K36 trimethylation but not dimethylation by Set2p; suggested stimulatory role in 80S formation during translation initiation; similar to the Drosophila …
	CAGL0E02101g	1.39373209064864		Ortholog(s) have 5'-deoxyribose-5-phosphate lyase activity, ATP-dependent 3'-5' RNA helicase activity, mRNA binding, polynucleotide adenylyltransferase activity	C1_05360C		Putative non-canonical poly(A) polymerase; repressed by nitric oxide; Spider biofilm induced	YOL115W	PAP2	Non-canonical poly(A) polymerase; involved in nuclear RNA degradation as a component of TRAMP; catalyzes polyadenylation of hypomodified tRNAs, and snoRNA and rRNA precursors; required for mRNA surveillance and maintenance of genome integrity, serving as a link between RNA and DNA metabolism; overlapping but non-redundant functions with Trf5p; relocalizes to cytosol in response to hypoxia
	CAGL0C03113g	1.42166727046619		Ortholog(s) have RNA 7-methylguanosine cap binding, exoribonuclease activator activity, m7G(5')pppN diphosphatase activity	C7_01190W		Ortholog(s) have RNA 7-methylguanosine cap binding, exoribonuclease activator activity, m7G(5')pppN diphosphatase activity	YLR270W	DCS1	Non-essential hydrolase involved in mRNA decapping; activates Xrn1p; may function in a feedback mechanism to regulate deadenylation, contains pyrophosphatase activity and a HIT (histidine triad) motif; acts as inhibitor of neutral trehalase Nth1p; required for growth on glycerol medium; protein abundance increases in response to DNA replication stress; DCS1 has a paralog, DCS2, that arose from th…
	CAGL0G08250g	1.42375394778161		Ortholog(s) have mRNA binding, metalloaminopeptidase activity and role in negative regulation of gene expression, protein initiator methionine removal involved in protein maturation	C4_06850C		Ortholog(s) have mRNA binding, metalloaminopeptidase activity and role in negative regulation of gene expression, protein initiator methionine removal involved in protein maturation	YLR244C	MAP1	Methionine aminopeptidase; catalyzes the cotranslational removal of N-terminal methionine from nascent polypeptides; function is partially redundant with that of Map2p
	CAGL0E02959g	1.42498252054951		Ortholog(s) have rRNA binding activity, role in RNA splicing, mitochondrial RNA processing, mitochondrial genome maintenance, rRNA metabolic process and mitochondrion localization	C6_03440W		Ortholog(s) have rRNA binding activity, role in RNA splicing, mitochondrial RNA processing, mitochondrial genome maintenance, rRNA metabolic process and mitochondrion localization	YGR150C	CCM1	Mitochondrial 15S rRNA-binding protein; required for intron removal of COB and COX1 pre-mRNAs; has separable roles in stabilizing mitochondrial 15S rRNA and in maturation of the COB and COX1 mRNAs; contains pentatricopeptide repeat (PPR) motifs; mutant is respiratory deficient and has defective plasma membrane electron transport
	CAGL0M09515g	1.43621407923643		Ortholog(s) have transcription factor activity, RNA polymerase II transcription factor recruiting activity	C6_01640W	MED19	RNA polymerase II mediator complex subunit	YBL093C	ROX3	Subunit of the RNA polymerase II mediator complex; associates with core polymerase subunits to form the RNA polymerase II holoenzyme
	CAGL0H02211g	1.44852833531402		Ortholog(s) have U6 snRNA binding activity, role in spliceosomal complex assembly, spliceosomal tri-snRNP complex assembly and U6 snRNP localization	CR_01700C		Ortholog(s) have U6 snRNA binding activity, role in spliceosomal complex assembly, spliceosomal tri-snRNP complex assembly and U6 snRNP localization	YMR268C	PRP24	Splicing factor that reanneals snRNPs during spliceosome recycling; reanneals U4 and U6 snRNPs
	CAGL0L08250g	1.4919379093653		Ortholog(s) have role in transcription initiation from RNA polymerase II promoter and nucleus localization
	CAGL0L10934g	1.49381389184697		Ortholog(s) have tRNA binding, tRNA dimethylallyltransferase activity, role in tRNA modification, transfer RNA gene-mediated silencing and cytosol, mitochondrion, nucleolus localization	C1_09390W		Ortholog(s) have tRNA binding, tRNA dimethylallyltransferase activity, role in tRNA modification, transfer RNA gene-mediated silencing and cytosol, mitochondrion, nucleolus localization	YOR274W	MOD5	Delta 2-isopentenyl pyrophosphate:tRNA isopentenyl transferase; required for biosynthesis of isopentenyladenosine in mitochondrial and cytoplasmic tRNAs; also has a role in tRNA gene-mediated silencing; gene encodes two isozymic forms; converts to a prion form, prion conversion contributes to azole antifungal resistance by upregulating ergosterol biosynthesis; homolog of human TRIT1, a mutation i…
	CAGL0M05181g	1.50362316273718		Ortholog(s) have role in spliceosomal complex assembly and U2 snRNP, U2-type prespliceosome localization	CR_10060W		Protein with a predicted role in assembly of U2 snRNP into the spliceosome; Spider biofilm induced	YMR240C	CUS1	Protein required for assembly of U2 snRNP into the spliceosome; forms a complex with Hsh49p and Hsh155p
	CAGL0E00935g	1.52456539674031		Ortholog(s) have chromatin binding, protein complex scaffold activity and role in RNA polymerase II transcriptional preinitiation complex assembly, histone acetylation	CR_01120C		Putative TFIID and SAGA complex subunit; possibly an essential gene, disruptants not obtained by UAU1 method	YDR167W	TAF10	Subunit (145 kDa) of TFIID and SAGA complexes; involved in RNA polymerase II transcription initiation and in chromatin modification
	CAGL0I06688g	1.52958354651251		Ortholog(s) have DNA binding, bending, RNA polymerase I transcription factor binding and RNA polymerase II activating transcription factor binding, more	C1_10660W	TBP1	Transcription initiation factor; binds TATA box sequence, binding does not require TFIIA; caspofungin repressed; functional homolog of S. cerevisiae and human TATA-binding proteins; Spider biofilm induced	YER148W	SPT15	TATA-binding protein (TBP); general transcription factor that interacts with other factors to form the preinitiation complex at promoters; essential for viability, highly conserved; yeast gene can complement mutations in human homolog TBP
	CAGL0M11616g	1.52967929496762		Ortholog(s) have role in rRNA processing, ribosomal large subunit assembly and mitochondrion, mitotic spindle pole body, nucleoplasm, preribosome, large subunit precursor localization	C4_00970C	MDN1	Putative midasin, a very large dynein-related AAA-type ATPase; induced during the mating process	YLR106C	MDN1	Huge dynein-related AAA-type ATPase (midasin); forms extended pre-60S particle with the Rix1 complex (Rix1p-Ipi1p-Ipi3p); acts in removal of ribosomal biogenesis factors at successive steps of pre-60S assembly and export from nucleus
	CAGL0M04631g	1.55838893423881		Putative spliceosome component; gene is upregulated in azole-resistant strain	C5_01510W	SMD3	Putative core snRNP protein; induced upon adherence to polystyrene	YLR147C	SMD3	Core Sm protein Sm D3; part of heteroheptameric complex (with Smb1p, Smd1p, Smd2p, Sme1p, Smx3p, and Smx2p) that is part of the spliceosomal U1, U2, U4, and U5 snRNPs; homolog of human Sm D3
	CAGL0J06754g	1.5679823455604		Ortholog(s) have role in positive regulation of DNA-templated transcription, elongation, positive regulation of transcription from RNA polymerase I promoter, positive regulation of translational fidelity, protein phosphorylation	C2_10700C		Ortholog(s) have role in positive regulation of DNA-templated transcription, elongation, positive regulation of transcription from RNA polymerase I promoter, positive regulation of translational fidelity, protein phosphorylation	YML112W	CTK3	Gamma subunit of C-terminal domain kinase I; CTDK-I phosphorylates RNA polymerase II subunit Rpo21p to affect transcription and pre-mRNA 3' end processing, and also phosphorylates ribosomal protein Rps2p to increase translational fidelity; protein abundance increases in response to DNA replication stress
	CAGL0M08976g	1.58772892088883		Ortholog(s) have role in mRNA splicing, via spliceosome and U4/U6 x U5 tri-snRNP complex localization	C2_03200W	PRP3	Predicted splicing factor, component of the U4/U6-U5 snRNP complex; Hap43-induced gene; rat catheter biofilm induced	YDR473C	PRP3	Splicing factor; component of the U4/U6-U5 snRNP complex
	CAGL0J07678g	1.58977372079111		Ortholog(s) have ribosomal small subunit binding, translation initiation factor activity, translation initiation factor binding activity and role in formation of translation preinitiation complex, maintenance of translational fidelity	C5_04090C	SUI1	Putative translation initiation factor; flucytosine induced; genes encoding ribosomal subunits, translation factors, and tRNA synthetases are downregulated upon phagocytosis by murine macrophage	YNL244C	SUI1	Translation initiation factor eIF1; component of a complex involved in recognition of the initiator codon; modulates translation accuracy at the initiation phase
	CAGL0M09911g	1.60895161756008		Ortholog(s) have tRNA dihydrouridine synthase activity, role in tRNA modification and mitochondrion localization	C5_00290W	DUS4	Ortholog(s) have tRNA dihydrouridine synthase activity, role in tRNA modification and mitochondrion localization	YLR405W	DUS4	tRNA dihydrouridine synthase	Dihydrouridine synthase; member of a widespread family of conserved proteins including Smm1p, Dus1p, and Dus3p
	CAGL0L11792g	1.60919575414066		Ortholog(s) have mRNA binding, poly(A) binding, promoter-specific chromatin binding, ribonuclease inhibitor activity	C1_03370W		Putative poly(A)-binding protein; regulated by Gcn4p; induced in response to amino acid starvation (3-AT treatment); protein present in exponential and stationary growth phase yeast cultures	YER165W	PAB1	Poly(A) binding protein; part of the 3'-end RNA-processing complex, mediates interactions between the 5' cap structure and the 3' mRNA poly(A) tail, involved in control of poly(A) tail length, interacts with translation factor eIF-4G; stimulates, but is not required for the deadenylation activity of the Pan2p-Pan3p poly(A)-ribonuclease complex
	CAGL0E05786g	1.64534077030169		Ortholog(s) have role in mRNA splicing, via spliceosome and U2 snRNP, U2-type prespliceosome, cytoplasm localization	C4_05750C	LEA1	Predicted component of U2 snRNP; induced by alpha pheromone in SpiderM medium	YPL213W	LEA1	Component of U2 snRNP complex; disruption causes reduced U2 snRNP levels; physically interacts with Msl1p; putative homolog of human U2A' snRNP protein
	CAGL0J07326g	1.65389405386067		Ortholog(s) have role in mRNA splicing, via spliceosome, maturation of SSU-rRNA, positive regulation of ATPase activity, positive regulation of helicase activity	CR_03230W		Ortholog(s) have role in mRNA splicing, via spliceosome, maturation of SSU-rRNA, positive regulation of ATPase activity, positive regulation of helicase activity	YNL224C	SQS1	Protein that stimulates the ATPase and helicase activities of Prp43p; acts with Prp43p to stimulate 18s rRNA maturation by Nob1p; overexpression antagonizes the suppression of splicing defects by spp382 mutants; component of pre-ribosomal particles; relocalizes from nucleus to nucleolus upon DNA replication stress
	CAGL0B04675g	1.65799357519235		Ortholog(s) have RNA binding, endoribonuclease activity, ribosome binding activity	CR_03070W	DOM34	Endonuclease involved in regulation of translation; stimulates translation of protein O-mannosyltransferase family which includes PMT1, PMT2, PMT4, PMT5, and PMT6; peloto ortholog; Hap43-repressed gene	YNL001W	DOM34	Protein that facilitates ribosomal subunit dissociation; Dom34-Hbs1 complex and Rli1p have roles in dissociating inactive ribosomes to facilitate translation restart, particularly ribosomes stalled in 3' UTRs; required for RNA cleavage in no-go decay, but reports conflict on endonuclease activity; Pelota ortholog; protein abundance increases in response to DNA replication stress; DOM34 has a para…
	CAGL0L11858g	1.67225680196945	CCA1	ATP(CTP):tRNA nucleotidyltransferase, synthesizes the CCA sequence at the 3' end of tRNAs	C4_00880W		Ortholog(s) have ATP:3'-cytidine-cytidine-tRNA adenylyltransferase activity, CTP:3'-cytidine-tRNA cytidylyltransferase activity, role in tRNA 3'-terminal CCA addition and cytosol, mitochondrial matrix localization	YER168C	CCA1	ATP (CTP):tRNA-specific tRNA nucleotidyltransferase; different forms targeted to the nucleus, cytosol, and mitochondrion are generated via the use of multiple transcriptional and translational start sites; human homolog TRNT1 complements yeast null mutant
	CAGL0M01804g	1.67241264971107		Ortholog(s) have mRNA binding, translation initiation factor activity and role in cellular response to drug, regulation of translation in response to nitrogen starvation, translation reinitiation	C1_12770W	RPG1A	Putative translation initiation factor; mutation confers hypersensitivity to roridin A and verrucarin A; repressed upon phagocytosis by murine macrophage; Spider biofilm repressed	YBR079C	RPG1	eIF3a subunit of the eukaryotic translation initiation factor 3 (eIF3); subunit of the core complex of eIF3; essential for translation; part of a Prt1p-Rpg1p-Nip1p subcomplex that stimulates binding of mRNA and tRNA(i)Met to ribosomes; involved in translation reinitiation; eIF3 is also involved in programmed stop codon readthrough
	CAGL0K06435g	1.68983394061851		Ortholog(s) have role in negative regulation of transcription from RNA polymerase II promoter and cytosol, nucleus localization	CR_03700C		Ortholog of S. cerevisiae Spp41; protein involved in negative regulation of expression of spliceosome components PRP4 and PRP3 in S. cerevisiae; mutants are viable	YDR464W	SPP41	Protein of unknown function; involved in negative regulation of expression of spliceosome components PRP4 and PRP3; relocalizes to the cytosol in response to hypoxia
	CAGL0L13409r	1.70251857774953	RDN5-1	5S rRNA
	CAGL0J07810g	1.72441449536909		Ortholog(s) have mRNA binding, protein domain specific binding, transcription regulatory region RNA binding activity	C5_00790C		Putative RNA-binding protein; transcript is upregulated in an RHE model of oral candidiasis	YNL251C	NRD1	RNA-binding subunit of Nrd1 complex; complex interacts with exosome to mediate 3'-end formation of some mRNAs, snRNAs, snoRNAs, and CUTs; interacts with CTD of RNA pol II large subunit Rpo21p at phosphorylated Ser5 to direct transcription termination of non-polyadenylated transcripts; H3K4 trimethylation of transcribed regions by Set1p enhances recruitment of Nrd1p to those sites; role in regulat…
	CAGL0L00363g	1.72520736536234		Ortholog(s) have polyubiquitin binding, single-stranded DNA binding, single-stranded DNA endodeoxyribonuclease activity	C1_05820C	RAD10	Ortholog of S. cerevisiae Rad10, an endonuclease involved in nucleotide excision repair; mutant is extremely sensitive to UV irradiation; transcript repressed in alkaline conditions	YML095C	RAD10	Single-stranded DNA endonuclease (with Rad1p); cleaves single-stranded DNA during nucleotide excision repair and double-strand break repair; subunit of Nucleotide Excision Repair Factor 1 (NEF1); homolog of human ERCC1 protein
	CAGL0A00473g	1.7274114869416		Ortholog(s) have mRNA binding activity	C3_00730W		Ortholog(s) have mRNA binding activity	YGL014W	PUF4	Member of the PUF protein family; PUF family is defined by the presence of Pumilio homology domains that confer RNA binding activity; preferentially binds mRNAs encoding nucleolar ribosomal RNA-processing factors
	CAGL0K05049g	1.73237634770987		Ortholog(s) have ribonuclease MRP activity, ribonuclease P activity, tRNA binding activity	CR_03200C		Ortholog(s) have ribonuclease MRP activity, ribonuclease P activity, tRNA binding activity	YNL221C	POP1	Subunit of RNase MRP, nuclear RNase P and telomerase complexes; RNase MRP cleaves pre-rRNA, nuclear RNase P cleaves tRNA precursors to generate mature 5' ends and facilitates turnover of nuclear RNAs, while telomerase replenishes telomeric DNA; binds to the RPR1 RNA subunit in RNase P
	CAGL0F06237g	1.74653090712049		Ortholog(s) have DNA replication origin binding, RNA polymerase II activating transcription factor binding, RNA polymerase II core promoter proximal region sequence-specific DNA binding and bending, more	C7_00890C	MCM1	Transcription factor; regulator of hyphal growth; may act with Wor1p; canonical and non-canonical binding sites; MADS domain DNA-binding motif; similar to S. cerevisiae Mcm1p; greater expression in white than opaque cells; intron in 5'-UTR	YMR043W	MCM1	Transcription factor; involved in cell-type-specific transcription and pheromone response; plays a central role in the formation of both repressor and activator complexes; relocalizes to the cytosol in response to hypoxia
	CAGL0D00902g	1.74734170156559		Ortholog(s) have role in DNA amplification, DNA strand renaturation, double-strand break repair via single-strand annealing, regulation of DNA biosynthetic process, telomere maintenance via recombination and cytoplasm, nucleus localization	C4_05270C	RAD59	Protein involved in homologous recombination and DNA breaks repair; similar to S. cerevisiae Rad59p; N-terminal similarity with Rad52p	YDL059C	RAD59	Protein involved DNA double-strand break repair; repairs breaks in DNA during vegetative growth via recombination and single-strand annealing; anneals complementary single-stranded DNA; forms nuclear foci upon DNA replication stress; required for loading of Rad52p to DSBs; regulates replication fork progression in DNA ligase I-deficient cells; paralog of Rad52p
	CAGL0H10472g	1.74912738713377		Ortholog(s) have role in RNA polymerase II complex import to nucleus, RNA polymerase III complex localization to nucleus and DNA-directed RNA polymerase II, holoenzyme, cytoplasm localization	C7_02170C		Ortholog(s) have role in RNA polymerase II complex import to nucleus, RNA polymerase III complex localization to nucleus and DNA-directed RNA polymerase II, holoenzyme, cytoplasm localization	YDL115C	IWR1	RNA polymerase II transport factor, conserved from yeast to humans; also has a role in transporting RNA polymerase III into the nucleus; interacts with most of the RNAP II subunits; nucleo-cytoplasmic shuttling protein; deletion causes hypersensitivity to K1 killer toxin; protein increases in abundance and relocalizes from nucleus to cytoplasm upon DNA replication stress
	CAGL0H00528g	1.75211837431239		Ortholog(s) have histone demethylase activity (H3-dimethyl-K4 specific), histone demethylase activity (H3-monomethyl-K4 specific), histone demethylase activity (H3-trimethyl-K4 specific) activity	C4_00260W		Ortholog(s) have histone demethylase activity (H3-dimethyl-K4 specific), histone demethylase activity (H3-monomethyl-K4 specific), histone demethylase activity (H3-trimethyl-K4 specific) activity	YJR119C	JHD2	JmjC domain family histone demethylase; promotes global demethylation of H3K4 and repression of noncoding intergenic transcription during sporulation; removes methyl groups added by Set1p methyltransferase; negatively regulated by H3K14 acetylation; protein levels regulated by Not4p polyubiquitin-mediated degradation; regulates sporulation timing by extending period of active transcription in opp…
	CAGL0F00803g	1.75444386893583	GAL11B	Component of the transcriptional Mediator complex that provides interfaces between RNA polymerase II and upstream activator proteins; one of the two Gal11p homologs of S. cerevisiae Gal11p present in C. glabrata	C1_08270C	MED15	RNA polymerase II mediator complex subunit; possibly an essential gene, disruptants not obtained by UAU1 method	YOL051W	GAL11	Subunit of the RNA polymerase II mediator complex; associates with core polymerase subunits to form the RNA polymerase II holoenzyme; affects transcription by acting as target of activators and repressors; forms part of the tail domain of mediator
	CAGL0H04675g	1.75885792974125		Ortholog(s) have cytosol, eukaryotic 43S preinitiation complex, eukaryotic translation initiation factor 3 complex, eIF3e, eukaryotic translation initiation factor 3 complex, eIF3m, nucleus localization
	CAGL0K00473g	1.77869031703638		Ortholog(s) have Ran GTPase binding activity, role in tRNA re-export from nucleus and cytosol, mitochondrion, nuclear envelope, nuclear matrix localization	C7_04200C		Putative exportin, member of the Exportin-T family; flow model biofilm repressed	YKL205W	LOS1	Nuclear pore protein; involved in nuclear export of pre-tRNA and in re-export of mature tRNAs after their retrograde import from the cytoplasm; deletion mutation extends replicative lifespan, as does exclusion of Los1p from the nucleus in response to caloric restriction
	CAGL0L03003g	1.79753203834564	GCN3	Translation initiation factor eIF2B	C7_01220W	GCN3	Putative translation initiator; downregulated in the presence of human whole blood or polymorphonuclear (PMN) cells	YKR026C	GCN3	Alpha subunit of translation initiation factor eIF2B; guanine-nucleotide exchange factor for eIF2; activity subsequently regulated by phosphorylated eIF2; positive regulator of GCN4 expression; assembles into filaments with Gcd2p, Gcd6p, Gcd7p, and Sui2p as cells approach stationary phase and under cytosolic acidification and starvation conditions; human homolog EIF2B1 can complement yeast null m…
	CAGL0G03465g	1.81763553881051		Ortholog(s) have U6 snRNA binding activity and role in cytoplasmic mRNA processing body assembly, mRNA splicing, via spliceosome	C7_02510W		Ortholog(s) have U6 snRNA binding activity and role in cytoplasmic mRNA processing body assembly, mRNA splicing, via spliceosome	YER112W	LSM4	Lsm (Like Sm) protein; part of heteroheptameric complexes (Lsm2p-7p and either Lsm1p or 8p): cytoplasmic Lsm1p complex involved in mRNA decay; nuclear Lsm8p complex part of U6 snRNP and possibly involved in processing tRNA, snoRNA, and rRNA; forms cytoplasmic foci upon DNA replication stress
	CAGL0L06952g	1.82603905029321	TIF34	Translation initiation factor eIF3, p39 subunit; protein abundance decreased in ace2 mutant cells
	CAGL0M07403g	1.82714048287482	OAZ1	Ortholog(s) have ornithine decarboxylase inhibitor activity and role in negative regulation of translational frameshifting, regulation of proteasomal protein catabolic process				YPL052W	OAZ1	Regulator of ornithine decarboxylase Spe1p; antizyme that binds to Spe1p to stimulate ubiquitin-independent degradation by the proteasome; binding of polyamines to nascent Oaz1p during translation stimulates +1 ribosomal frameshifting, allowing translation of full-length Oaz1p
	CAGL0M13893g	1.83083388799003		Ortholog(s) have mRNA binding, translation initiation factor activity, translation initiation factor binding activity and role in cellular response to drug, translational initiation	C4_01490W	NIP1	Putative translation initiation factor; mutation confers hypersensitivity to roridin A and verrucarin A; genes encoding ribosomal subunits, translation factors, and tRNA synthetases are downregulated upon phagocytosis by murine macrophage	YMR309C	NIP1	eIF3c subunit of the eukaryotic translation initiation factor 3 (eIF3); involved in the assembly of preinitiation complex and start codon selection; eIF3 is also involved in programmed stop codon readthrough
	CAGL0M08844g	1.85588881002319		Ortholog(s) have protein-lysine N-methyltransferase activity, role in peptidyl-lysine monomethylation, regulation of cytoplasmic translation in response to stress and nucleus localization	C5_03250W	RMS1	Putative lysine methyltransferase; Hap43-induced; protein induced during mating; possibly essential, disruptants not obtained by UAU1 method; rat catheter and Spider biofilm induced	YDR257C	RKM4	Ribosomal lysine methyltransferase; specific for monomethylation of Rpl42ap and Rpl42bp (lysine 55); nuclear SET-domain containing protein
	CAGL0J07414g	1.86093305019507		Ortholog(s) have ubiquitin-protein transferase activity, role in protein ubiquitination involved in ubiquitin-dependent protein catabolic process and Cul3-RING ubiquitin ligase complex, cytoplasm, elongin complex localization	C1_03810C	ELA1	Elongin A; F-box protein; ubiquitin-protein ligase; role in protein ubiquitination and ubiquitin-dependent protein catabolism; rat catheter biofilm induced	YNL230C	ELA1	Elongin A; F-box protein that forms a heterodimer with Elc1p and is required for ubiquitin-dependent degradation of the RNA Polymerase II subunit Rpo21p; subunit of the Elongin-Cullin-Socs (ECS) ligase complex
	CAGL0K07854g	1.86978163487152		Ortholog(s) have role in mRNA splicing, via spliceosome and U4/U6 x U5 tri-snRNP complex, U5 snRNP localization	C5_00920W		Ortholog(s) have role in mRNA splicing, via spliceosome, regulation of DNA methylation and U4/U6 x U5 tri-snRNP complex, U5 snRNP localization	YPR082C	DIB1	17-kDa component of the U4/U6aU5 tri-snRNP; plays an essential role in pre-mRNA splicing; human ortholog TXNL4A (the human U5-specific 15-kDa protein) complements yeast dib1 null mutant
	CAGL0K01045g	1.87132039856231		Ortholog(s) have enzyme regulator activity, guanyl-nucleotide exchange factor activity, translation initiation factor activity	C3_07250W	GCD2	Putative translation initiation factor; genes encoding ribosomal subunits, translation factors, and tRNA synthetases are downregulated upon phagocytosis by murine macrophage	YGR083C	GCD2	Delta subunit of the translation initiation factor eIF2B; the guanine-nucleotide exchange factor for eIF2; activity subsequently regulated by phosphorylated eIF2; first identified as a negative regulator of GCN4 expression
	CAGL0G06974g	1.87144010697553		Ortholog(s) have DNA-directed 5'-3' RNA polymerase activity, RNA polymerase III activity and role in tRNA transcription from RNA polymerase III promoter, transcription initiation from RNA polymerase III promoter	C5_04990W		Ortholog(s) have DNA-directed 5'-3' RNA polymerase activity, RNA polymerase III activity and role in tRNA transcription from RNA polymerase III promoter, transcription initiation from RNA polymerase III promoter	YJL011C	RPC17	RNA polymerase III subunit C17; physically interacts with C31, C11, and TFIIIB70; may be involved in the recruitment of pol III by the preinitiation complex; protein abundance increases in response to DNA replication stress; relocalizes to the cytosol in response to hypoxia
	CAGL0H06215g	1.8846191960458	GAL11A	Component of the transcriptional Mediator complex that provides interfaces between RNA polymerase II and upstream activator proteins; one of the two Gal11p homologs of S. cerevisiae Gal11p present in C. glabrata
	CAGL0C02585g	1.89585284920569		Ortholog(s) have ATPase activity, role in response to drug, ribosomal large subunit biogenesis and cytosol, preribosome, large subunit precursor localization	CR_08590W		Ortholog(s) have ATPase activity, role in response to drug, ribosomal large subunit biogenesis and cytosol, preribosome, large subunit precursor localization	YLR397C	AFG2	ATPase of the CDC48/PAS1/SEC18 (AAA) family, forms a hexameric complex; is essential for pre-60S maturation and release of several preribosome maturation factors; releases Rlp24p from purified pre-60S particles in vitro; target of the ribosomal biosynthesis inhibitor diazaborine; may be involved in degradation of aberrant mRNAs
	CAGL0D02266g	1.91702775322057		Ortholog(s) have cytoplasm, holo TFIIH complex localization	C3_06550C		Ortholog(s) have cytoplasm, holo TFIIH complex localization	YOR352W	TFB6	Subunit of TFIIH complex; facilities dissociation of the Ssl2p helices from TFIIH; expression levels regulated by Arg5,6p; green fluorescent protein (GFP)-fusion protein localizes to the cytoplasm and nucleus
	CAGL0J07370g	1.91962735942018		Ortholog(s) have ATPase activator activity and role in endocytosis, rRNA processing, regulation of cell size, ribosomal large subunit biogenesis, ribosomal large subunit export from nucleus	CR_03240C		Putative transcription factor with zinc finger DNA-binding motif; similar to bacterial DnaJ; induced in low iron	YNL227C	JJJ1	Co-chaperone that stimulates the ATPase activity of Ssa1p; required for a late step of ribosome biogenesis; associated with the cytosolic large ribosomal subunit; contains a J-domain; mutation causes defects in fluid-phase endocytosis
	CAGL0L09647g	1.92142923948094		Ortholog(s) have unfolded protein binding activity, role in ribosomal large subunit assembly and cytosol, cytosolic ribosome, nucleus, preribosome, large subunit precursor localization	C5_05340W		Ortholog(s) have unfolded protein binding activity, role in ribosomal large subunit assembly and cytosol, cytosolic ribosome, nucleus, preribosome, large subunit precursor localization	YIR012W	SQT1	Specific chaperone for ribosomal protein Rpl10p; binds nascent Rpl10p during translation; contains multiple WD repeats; interacts with Qsr1p in a two-hybrid assay; protein abundance increases in response to DNA replication stress
	CAGL0D05368g	1.93286458733967		Has domain(s) with predicted RNA polymerase II transcription cofactor activity, role in regulation of transcription from RNA polymerase II promoter and mediator complex localization
	CAGL0K06655g	1.94024729503746		Ortholog(s) have mRNA binding activity, role in 3'-UTR-mediated mRNA destabilization, mitochondrion organization and P-body, cytoplasmic stress granule, cytosol, perinuclear region of cytoplasm localization	C3_07100C		Ortholog(s) have mRNA binding activity, role in 3'-UTR-mediated mRNA destabilization, mitochondrion organization and P-body, cytoplasmic stress granule, cytosol, perinuclear region of cytoplasm localization	YBR212W	NGR1	RNA binding protein that negatively regulates growth rate; interacts with the 3' UTR of the mitochondrial porin (POR1) mRNA and enhances its degradation; overexpression impairs mitochondrial function; interacts with Dhh1p to mediate POR1 mRNA decay; expressed in stationary phase
	CAGL0I08635g	1.95026618551446		Ortholog(s) have RNA polymerase II transcription factor activity, TBP-class protein binding, RNA polymerase II transcription factor activity and TBP-class protein binding, more	C4_02630C	HFL2	HAP5-like; ortholog of S. cerevisiae Bur6, a heterodimeric NC2 transcription regulator complex subunit; flucytosine induced	YER159C	BUR6	Subunit of a heterodimeric NC2 transcription regulator complex; complex binds to TBP and can repress transcription by preventing preinitiation complex assembly or stimulate activated transcription; homologous to human NC2alpha; complex also includes Ncb2p; bur6 ncb2 double mutation is functionally complemented by coexpression of human DRAP1 and DR1, although the single bur6 mutation is not comple…
	CAGL0D01188g	1.96998123656247	TEF1	Translation elongation factor eEF1 alpha-A chain	C2_08370C	TEF1	Translation elongation factor 1-alpha; at cell surface; binds human plasminogen; macrophage/pseudohyphal-induced; induced in RHE model of oral candidiasis, in clinical oral candidiasis isolates; possibly essential; Spider biofilm repressed	YPR080W	TEF1	Translational elongation factor EF-1 alpha; in the GTP-bound active form, binds to and delivers aminoacylated tRNA to the A-site of ribosomes for elongation of nascent polypeptides; associates with vacuolar Rho1p GTPase; may also have a role in tRNA re-export from the nucleus; TEF1 has a paralog, TEF2, that arose from the whole genome duplication
	CAGL0G00154g	1.97702968189209		Ortholog(s) have ribosome binding activity and role in rRNA processing, regulation of translational fidelity, ribosomal subunit export from nucleus, translational frameshifting	C4_02870C	ZUO1	Ortholog of S. cerevisiae Zuo1; a cytosolic ribosome-associated chaperone; likely to be essential for growth, based on an insertional mutagenesis strategy; Spider biofilm repressed	YGR285C	ZUO1	Ribosome-associated chaperone; zuotin functions in ribosome biogenesis and as a chaperone for nascent polypeptide chains in partnership with Ssz1p and SSb1/2; contains a DnaJ domain and functions as a J-protein partner for Ssb1p and Ssb2p; human gene DNAJC2 can partially complement yeast zuo1 null mutant
	CAGL0E05390g	1.97872458977912	ALA1	Ortholog(s) have alanine-tRNA ligase activity, role in alanyl-tRNA aminoacylation and cytosol, mitochondrion localization	C6_03720W	ALA1	Alanyl-tRNA synthetase; translational regulation generates cytoplasmic and mitochondrial forms; Gcn4p-regulated; repressed by amino acid starvation (3-AT); translation-related genes downregulated upon phagocytosis by murine macrophages	YOR335C	ALA1	Cytoplasmic and mitochondrial alanyl-tRNA synthetase; required for protein synthesis; point mutation (cdc64-1 allele) causes cell cycle arrest at G1; lethality of null mutation is functionally complemented by human homolog AARS; mutations in human homolog AARS are associated with autoimmune disease polymyositis/dermatomyositis
	CAGL0E01903g	1.99223201042085		Ortholog(s) have tRNA methyltransferase activity, role in tRNA methylation and cytosol, nucleolus localization	CR_00670C		Putative 2'-O-methyltransferase with a predicted role in tRNA modification; transcription is activated in the presence of elevated CO2	YOL125W	TRM13	2'-O-methyltransferase; responsible for modification of tRNA at position 4; C-terminal domain has similarity to Rossmann-fold (RFM) superfamily of RNA methyltransferases
	CAGL0D03740g	2.00211454644641		Ortholog(s) have RNA binding, ribonuclease MRP activity, ribonuclease P activity	C1_03800W	RPP1	Putative ortholog of S. cerevisiae Rpp1; subunit of both RNase MRP and nuclear RNase P; rat catheter and Spider biofilm induced	YHR062C	RPP1	Subunit of both RNase MRP and nuclear RNase P; RNase MRP cleaves pre-rRNA, while nuclear RNase P cleaves tRNA precursors to generate mature 5' ends and facilitates turnover of nuclear RNAs; relocalizes to the cytosol in response to hypoxia
	CAGL0M11198g	2.00262477972557		Ortholog(s) have protein complex scaffold, thiol-dependent ubiquitin-specific protease activity and role in RNA splicing, histone H3-K4 methylation, histone H3-K79 methylation, histone deubiquitination	C2_10140W		Ortholog(s) have protein complex scaffold, thiol-dependent ubiquitin-specific protease activity and role in RNA splicing, histone H3-K4 methylation, histone H3-K79 methylation, histone deubiquitination	YMR223W	UBP8	Ubiquitin-specific protease component of the SAGA acetylation complex; required for SAGA (Spt-Ada-Gcn5-Acetyltransferase)-mediated deubiquitination of histone H2B
	CAGL0I07667g	2.01461057456874		Ortholog(s) have tRNA (guanine(9)-N(1))-methyltransferase activity, role in tRNA N1-guanine methylation and cytoplasm, nucleolus localization	C2_06480W		Ortholog(s) have tRNA (guanine(9)-N(1))-methyltransferase activity, role in tRNA N1-guanine methylation and cytoplasm, nucleolus localization	YOL093W	TRM10	tRNA methyltransferase; methylates the N-1 position of guanine at position 9 in tRNAs; protein abundance increases in response to DNA replication stress; member of the SPOUT (SpoU-TrmD) methyltransferase family; human ortholog TRMT10A plays a role in the pathogenesis of microcephaly and early onset diabetes; an 18-mer originates from the TRM10 locus; genetic analysis shows the 18-mer is the trans…
	CAGL0G01782g	2.08890423187517		Ortholog(s) have RNA polymerase II transcription coactivator binding, RNA polymerase II transcription corepressor binding, core promoter sequence-specific DNA binding activity	C2_06830C	FHL1	Fork-head transcription factor; forms a heterodimer with Ifh1 that is tethered to promoters by Tbf1; positively regulates rRNA and ribosomal protein gene transcription	YPR104C	FHL1	Regulator of ribosomal protein (RP) transcription; has forkhead associated domain that binds phosphorylated proteins; recruits coactivator Ifh1p or corepressor Crf1p to RP gene promoters; also has forkhead DNA-binding domain though in vitro DNA binding assays give inconsistent results; computational analyses suggest it binds DNA directly at highly active RP genes and indirectly through Rap1p moti…
	CAGL0M06963g	2.10020141554564		Ortholog(s) have role in tRNA export from nucleus and cytosol localization				YCR073W-A	SOL2	Protein with a possible role in tRNA export; shows similarity to 6-phosphogluconolactonase non-catalytic domains but does not exhibit this enzymatic activity; homologous to Sol3p and Sol4p; SOL2 has a paralog, SOL1, that arose from the whole genome duplication
	CAGL0D03300g	2.10122965994424		Ortholog(s) have guanyl-nucleotide exchange factor activity, role in mature ribosome assembly and cytosol, nucleolus, polysome, preribosome, large subunit precursor localization	C4_02880C		Ortholog(s) have guanyl-nucleotide exchange factor activity, role in mature ribosome assembly and cytosol, nucleolus, polysome, preribosome, large subunit precursor localization	YLR022C	SDO1	Guanine nucleotide exchange factor (GEF) for Ria1p; essential protein involved in ribosome maturation; with Ria1p, promotes release of Tif6p from 60S ribosomal subunits in the cytoplasm so that they can assemble with 40S subunits to generate mature ribosomes; ortholog of the human protein (SBDS) responsible for autosomal recessive Shwachman-Bodian-Diamond Syndrome; highly conserved across archaea…
	CAGL0F01661g	2.1069322605794		Ortholog(s) have rRNA (uridine-N3-)-methyltransferase activity, role in rRNA base methylation and cytoplasm localization	CR_01780W		Putative S-adenosylmethionine-dependent methyltransferase; Hap43p-induced gene	YLR063W	BMT6	Methyltransferase required for m3U2843 methylation of the 25S rRNA; S-adenosylmethionine-dependent; green fluorescent protein (GFP)-fusion protein localizes to the cytoplasm; YLR063W is not an essential gene
	CAGL0K10010g	2.11739883406084		Ortholog(s) have rRNA (adenine) methyltransferase activity and role in rRNA methylation, ribosomal large subunit biogenesis	C2_08480W	RRP8	Ribosomal protein; Hap43-induced; F-12/CO2 early biofilm and rat catheter biofilm induced	YDR083W	RRP8	Nucleolar S-adenosylmethionine-dependent rRNA methyltransferase; methylates adenine (m1A) of the large subunit (LSU) rRNA at position 645; involved in pre-rRNA cleavage at site A2; mutation is synthetically lethal with a gar1 mutation; deletion disrupts telomere maintenance by influencing the expression of neighboring gene STN1
	CAGL0K03003g	2.13997413412528		Ortholog(s) have RNA polymerase II activating transcription factor binding and RNA polymerase II core promoter proximal region sequence-specific DNA binding, more	C4_01190W	CAS5	Transcription factor; cell wall damage response; required for adherence, response/resistance to caspofungin; repressed in core stress response; mutants have reduced CFU in mice, hyphal defect in C. elegans infection; Spider biofilm induced	YMR070W	MOT3	Transcriptional repressor, activator; role in cellular adjustment to osmotic stress including modulation of mating efficiency; involved in repression of subset of hypoxic genes by Rox1p, repression of several DAN/TIR genes during aerobic growth, ergosterol biosynthetic genes in response to hyperosmotic stress; contributes to recruitment of Tup1p-Cyc8p general repressor to promoters; relocalizes t…
	CAGL0G02535g	2.17808134971692		Ortholog(s) have chromatin DNA binding activity and role in positive regulation of transcription from RNA polymerase II promoter by pheromones, tRNA threonylcarbamoyladenosine metabolic process, telomere maintenance via recombination	C4_06290W		Ortholog(s) have chromatin DNA binding activity and role in positive regulation of transcription from RNA polymerase II promoter by pheromones, tRNA threonylcarbamoyladenosine metabolic process, telomere maintenance via recombination	YKR095W-A	PCC1	Component of the EKC/KEOPS protein complex; EKC/KEOPS complex is required for t6A tRNA modification and telomeric TG1-3 recombination; may have role in transcription; other complex members are Kae1p, Gon7p, Bud32p, and Cgi121p
	CAGL0L10164g	2.19030471688158		Ortholog(s) have role in translational termination and nucleus localization	C2_02930C		Ortholog of S. cerevisiae Ett1, a nuclear protein that inhibits replication of Brome mosaic virus; early-stage flow model biofilm induced	YOR051C	ETT1	Nuclear protein that inhibits replication of Brome mosaic virus; S. cerevisiae is a model system for studying replication of positive-strand RNA viruses in their natural hosts; deletion increases stop codon readthrough
	CAGL0M11814g	2.20069051749922		Ortholog(s) have role in generation of catalytic spliceosome for second transesterification step and U2-type catalytic step 1 spliceosome, U2-type catalytic step 2 spliceosome, post-mRNA release spliceosomal complex localization	C6_02440C	PRP45	Protein required for pre-mRNA splicing; Spider biofilm induced	YAL032C	PRP45	Protein required for pre-mRNA splicing; associates with the spliceosome and interacts with splicing factors Prp22p and Prp46p; orthologous to human transcriptional coactivator SKIP and can activate transcription of a reporter gene
	CAGL0J04070g	2.2091277984277		Ortholog(s) have RNA polymerase I activity, RNA polymerase II activity, RNA polymerase III activity, RNA-directed 5'-3' RNA polymerase activity	CR_04780W	RPB8	Putative subunit of RNA polymerases I, II, and III; regulated by Gcn4p; repressed in response to amino acid starvation (3-aminotriazole treatment); heterozygous null mutant exhibits resistance to parnafungin	YOR224C	RPB8	RNA polymerase subunit ABC14.5; common to RNA polymerases I, II, and III
	CAGL0E00781g	2.2432321069723		Ortholog(s) have mRNA binding, translation release factor activity and role in cytoplasmic translational termination, nuclear-transcribed mRNA catabolic process, deadenylation-dependent decay	C2_09720W	SUP35	Translation factor eRF3; shows prion-like aggregation in some, not all, studies; partially complements S. cerevisiae sup35 mutant translation defect; species barrier with S. cerevisiae Sup35p prion; gene not regulated by yeast-hyphal switch	YDR172W	SUP35	Translation termination factor eRF3; has a role in mRNA deadenylation and decay; altered protein conformation creates the [PSI(+)] prion that modifies cellular fitness, alters translational fidelity by affecting reading frame selection, and results in a nonsense suppressor phenotype; many stress-response genes are repressed in the presence of [PSI(+)]
	CAGL0B01463g	2.24402519532955		Ortholog(s) have RNA binding, manganese ion binding activity	C1_01160C		Exosome non-catalytic core component; involved in 3'-5' RNA processing and degradation in the nucleus and cytoplasm; Spider biofilm induced	YOL142W	RRP40	Exosome non-catalytic core component; involved in 3'-5' RNA processing and degradation in both the nucleus and the cytoplasm; predicted to contain both S1 and KH RNA binding domains; mutations in the human homolog, EXOSC3, cause pontocerebellar hypoplasia with motor neuron degeneration
	CAGL0I09438g	2.25174815044845		Ortholog(s) have protein-lysine N-methyltransferase activity, role in peptidyl-lysine dimethylation, positive regulation of translational termination and cytosol, nucleus localization	C2_02960C		Ortholog(s) have protein-lysine N-methyltransferase activity, role in peptidyl-lysine dimethylation, positive regulation of translational termination and cytosol, nucleus localization	YBR271W	EFM2	S-adenosylmethionine-dependent methyltransferase; seven-beta-strand lysine methyltransferase which dimethylates translation elongation factor EF2 (Eft1p and Eft2p) at lysine 613 and methylates EF3 (Yef3p) at lysine 187; green fluorescent protein (GFP)-fusion protein localizes to the cytoplasm; involved in regulation of translational termination; predicted involvement in ribosome biogenesis
	CAGL0J08932g	2.25450146763309		Ortholog(s) have ATP binding, magnesium ion binding activity, role in eukaryotic translation initiation factor 2 complex assembly, positive regulation of translational initiation and cytosol, nucleus localization	C4_02770C		Ortholog(s) have ATP binding, magnesium ion binding activity, role in eukaryotic translation initiation factor 2 complex assembly, positive regulation of translational initiation and cytosol, nucleus localization	YLR215C	CDC123	Assembly factor for the eIF2 translation initiation factor complex; regulates translational initiation; conserved residues of this ATP-Grasp protein that bind to ATP-Mg2+ in the pombe ortholog are required for complex assembly in budding yeast; interaction with eIF2 subunit Gcd11p facilitates complex assembly and activity; required for the START transition and timely progression through G2; regul…
	CAGL0H09526g	2.2680017093776		Ortholog(s) have ATP-dependent RNA helicase activity, second spliceosomal transesterification activity and role in generation of catalytic spliceosome for second transesterification step, spliceosomal complex disassembly	C5_05370C	PRP22	Putative RNA-dependent ATPase; induced upon adherence to polystyrene; induced by Mnl1p under weak acid stress	YER013W	PRP22	DEAH-box RNA-dependent ATPase/ATP-dependent RNA helicase; associates with lariat intermediates before the second catalytic step of splicing; mediates ATP-dependent mRNA release from the spliceosome and unwinds RNA duplexes; required for proofreading the exon ligation reaction
	CAGL0K08074g	2.27172467930963		Ortholog(s) have role in mRNA cis splicing, via spliceosome, response to xenobiotic stimulus, spliceosomal complex assembly and U2 snRNP, cytosol localization	C2_06790W		Putative pre-mRNA-splicing factor; decreased transcription is observed upon benomyl treatment	YPR094W	RDS3	Component of the SF3b subcomplex of the U2 snRNP; zinc cluster protein involved in pre-mRNA splicing and cycloheximide resistance
	CAGL0H05533g	2.27342113724943		Ortholog(s) have ATPase activity, DNA binding, TBP-class protein binding activity	C2_04500W		Ortholog(s) have ATPase activity, DNA binding, TBP-class protein binding activity	YPL082C	MOT1	Essential protein involved in regulation of transcription; removes Spt15p (TBP) from DNA via its C-terminal ATPase activity; may have a role in ensuring that soluble TBP is available to bind TATA-less promoters; forms a complex with TBP that binds TATA DNA with high affinity but with altered specificity; the Mot1p-Spt15p-DNA ternary complex contains unbent DNA; coregulates transcription with Spt1…
	CAGL0K07964g	2.27357061704214		Ortholog(s) have RNA polymerase II core binding, RNA polymerase II transcription factor activity, TBP-class protein binding, involved in preinitiation complex assembly and TBP-class protein binding, more	C1_03560C	SUA71	Transcription factor TFIIB; required for transcription initiation and start site selection by RNA polymerase II; downregulated during planktonic growth, whereas related SUA72 is induced; induced by Tbf1; rat catheter, Spider biofilm induced	YPR086W	SUA7	Transcription factor TFIIB; a general transcription factor required for transcription initiation and start site selection by RNA polymerase II
	CAGL0B04257g	2.28158817943772		Ortholog(s) have cell surface, cytosolic large ribosomal subunit, membrane localization	C1_14110C	RPL4B	Ribosomal protein 4B; repressed upon phagocytosis by murine macrophage; Spider biofilm repressed	YDR012W	RPL4B	Ribosomal 60S subunit protein L4B; homologous to mammalian ribosomal protein L4 and bacterial L4; RPL4B has a paralog, RPL4A, that arose from the whole genome duplication
	CAGL0A00847g	2.28259848615065		Ortholog(s) have tRNA-specific adenosine deaminase activity, tRNA-specific adenosine-34 deaminase activity and role in adenosine to inosine editing, tRNA modification	C1_08140W		Ortholog(s) have tRNA-specific adenosine deaminase activity, tRNA-specific adenosine-34 deaminase activity and role in adenosine to inosine editing, tRNA modification	YLR316C	TAD3	Subunit of tRNA-specific adenosine-34 deaminase; forms a heterodimer with Tad2p that converts adenosine to inosine at the wobble position of several tRNAs
	CAGL0D02354g	2.29141494399226		Ortholog(s) have pre-mRNA branch point binding activity, role in mRNA splicing, via spliceosome and commitment complex, cytosol localization	C3_03300C		Putative pre-mRNA branch point binding protein; role in mRNA splicing via spliceosome; Spider biofilm repressed	YLR116W	MSL5	Component of commitment complex; which defines first step in splicing pathway; essential protein that interacts with Mud2p and Prp40p, forming a bridge between the intron ends; also involved in nuclear retention of pre-mRNA; relocalizes to the cytosol in response to hypoxia
	CAGL0B02277g	2.29619970039861		Ortholog(s) have AT DNA binding activity, role in negative regulation of transcription from RNA polymerase II promoter and cytosol, nucleus localization				YML113W	DAT1	DNA binding protein that recognizes oligo(dA).oligo(dT) tracts; Arg side chain in its N-terminal pentad Gly-Arg-Lys-Pro-Gly repeat is required for DNA-binding; relocalizes to the cytosol in response to hypoxia; not essential for viability
	CAGL0G09669g	2.34622320950592		Ortholog(s) have guanyl-nucleotide exchange factor activity, translation initiation factor activity and role in cytoplasmic translational initiation, positive regulation of GTPase activity
	CAGL0G03113g	2.34847908341957		Ortholog(s) have role in exonucleolytic trimming to generate mature 3'-end of 5.8S rRNA from tricistronic rRNA transcript (SSU-rRNA, 5.8S rRNA and LSU-rRNA), more	C2_06660W		Ortholog(s) have role in exonucleolytic trimming to generate mature 3'-end of 5.8S rRNA from tricistronic rRNA transcript (SSU-rRNA, 5.8S rRNA and LSU-rRNA), more	YGR095C	RRP46	Exosome non-catalytic core component; involved in 3'-5' RNA processing and degradation in both the nucleus and the cytoplasm; has similarity to E. coli RNase PH and to human hRrp46p (EXOSC5)
	CAGL0J00275g	2.35383906137828		Ortholog(s) have cytosol, exosome (RNase complex), nucleus localization
	CAGL0H10164g	2.36428030643104		Ortholog(s) have role in mRNA methylation, meiotic nuclear division, negative regulation of pseudohyphal growth, premeiotic DNA replication and MIS complex localization	C5_05450C	MUM2	Protein similar to S. cerevisiae Mum2, a protein essential for meiotic DNA replication and sporulation; induced by alpha pheromone in SpiderM medium; transcript regulated by Tup1	YBR057C	MUM2	Protein essential for meiotic DNA replication and sporulation; cytoplasmic protein; subunit of the MIS complex which controls mRNA methylation during during the induction of sporulation; also interacts with Orc2p, which is a component of the origin recognition complex
	CAGL0I06380g	2.36783267426413	RPM2	Putative mitochondrial RNase P precursor; gene used for molecular typing of C. glabrata strain isolates
	CAGL0E03630g	2.37242191874643		Ortholog(s) have RNA binding activity, role in premeiotic DNA replication, reciprocal meiotic recombination, sporulation resulting in formation of a cellular spore and cytoplasm localization	C4_03460C		Putative protein of unknown function; transcript upregulated in clinical isolates from HIV+ patients with oral candidiasis; Spider biofilm induced	YHL024W	RIM4	Putative RNA-binding protein; required for the expression of early and middle sporulation genes
	CAGL0E02893g	2.37944470849225		Ortholog(s) have RNA polymerase I regulatory region DNA binding, RNA polymerase I transcription factor binding activity and role in transcription of nuclear large rRNA transcript from RNA polymerase I promoter	C4_06090C		Predicted component of the core factor rDNA transcription factor complex; required for transcription of 35S rRNA genes by RNA polymerase I in S. cerevisiae; possibly an essential gene, disruptants not obtained by UAU1 method	YBL014C	RRN6	Component of the core factor (CF) rDNA transcription factor complex; CF is required for transcription of 35S rRNA genes by RNA polymerase I and is composed of Rrn6p, Rrn7p, and Rrn11p
	CAGL0B03487g	2.39532566065492	TEF3	Translation elongation factor eEF3	C5_01580C	CEF3	Translation elongation factor 3; antigenic in humans; predicted C-term nucleotide-binding active site; protein on surface of yeast, not hyphae; polystyrene adherence induced; higher protein amount in stationary phase; possibly essential	YLR249W	YEF3	Translation elongation factor 3; contains two ABC cassettes; binds and hydrolyzes ATP; YEF3 has a paralog, HEF3, that arose from the whole genome duplication
	CAGL0I08393g	2.40641516650671	TIF3	Translation initiation factor eIF4B	C6_01630W	TIF3	Putative translation initiation factor; genes encoding ribosomal subunits, translation factors, and tRNA synthetases are downregulated upon phagocytosis by murine macrophage	YPR163C	TIF3	Translation initiation factor eIF-4B; contains an RNA recognition motif and binds to single-stranded RNA; has RNA annealing activity; interacts with Rps20p at the head of the 40S ribosomal subunit and alters the structure of the mRNA entry channel
	CAGL0K01573g	2.43213769624022		Ortholog(s) have RNA binding activity, role in mRNA 5'-splice site recognition and U2-type prespliceosome localization	C5_01930W		Ortholog(s) have RNA binding activity, role in mRNA 5'-splice site recognition and U2-type prespliceosome localization	YDL030W	PRP9	Subunit of the SF3a splicing factor complex; required for spliceosome assembly; acts after the formation of the U1 snRNP-pre-mRNA complex
	CAGL0L03157g	2.43562198202074		Ortholog(s) have RNA polymerase II transcription factor activity, sequence-specific DNA binding, sequence-specific DNA binding activity				YKR034W	DAL80	Negative regulator of genes in multiple nitrogen degradation pathways; expression is regulated by nitrogen levels and by Gln3p; member of the GATA-binding family, forms homodimers and heterodimers with Gzf3p; DAL80 has a paralog, GZF3, that arose from the whole genome duplication
	CAGL0G00330g	2.44904645559403		Ortholog(s) have role in mRNA splicing, via spliceosome and U2-type catalytic step 1 spliceosome, U2-type spliceosomal complex localization	C2_10100W	CWC22	Predicted spliceosome-associated protein; role in pre-mRNA splicing; Spider biofilm induced	YGR278W	CWC22	Spliceosome-associated protein that is required for pre-mRNA splicing; necessary for Prp2p function at the first catalytic step of splicing; has similarity to S. pombe Cwf22p; CWC22 is an essential protein
	CAGL0J03718g	2.50862226225256		Ortholog(s) have pseudouridine synthase activity, role in enzyme-directed rRNA pseudouridine synthesis, mRNA pseudouridine synthesis, snRNA pseudouridine synthesis, tRNA pseudouridine synthesis and cytoplasm, nucleus localization	C2_10270W	PUS7	Pseudouridine synthase; catalyzes pseudouridylation in U2 snRNA, 5S rRNA, cytoplasmic tRNAs and in pre-tRNA(Tyr); F-12/CO2 early biofilm induced	YOR243C	PUS7	Pseudouridine synthase; catalyzes pseudouridylation at positions 35 and 56 in U2 snRNA, position 50 in 5S rRNA, position 13 in cytoplasmic tRNAs, and position 35 in pre-tRNA(Tyr); also pseudouridylates some mRNAs; relocates from nucleus to cytoplasm during heat shock and differentially modifies some mRNAs during heat shock; conserved in archaea, vertebrates, and some bacteria
	CAGL0I09768g	2.50876973155637		Ortholog(s) have role in mRNA splicing, via spliceosome, maturation of 5S rRNA and U4/U6 x U5 tri-snRNP complex localization	C5_03010W		Ortholog(s) have role in mRNA splicing, via spliceosome, maturation of 5S rRNA and U4/U6 x U5 tri-snRNP complex localization	YOR308C	SNU66	Component of the U4/U6.U5 snRNP complex; involved in pre-mRNA splicing via spliceosome; also required for pre-5S rRNA processing and may act in concert with Rnh70p; has homology to human SART-1
	CAGL0L06754g	2.53936716002575		Ortholog(s) have translation release factor activity, codon specific activity and role in DNA-templated transcription, termination, asexual sporulation resulting in formation of a cellular spore, cytoplasmic translational termination	C2_05100C	ERF1	Putative translation release factor 1, which interacts with stop codons and promotes release of nascent peptides from ribosomes; Hap43p-induced gene	YBR143C	SUP45	Polypeptide release factor (eRF1) in translation termination; mutant form acts as a recessive omnipotent suppressor; methylated by Mtq2p-Trm112p in ternary complex eRF1-eRF3-GTP; mutation of methylation site confers resistance to zymocin; has a role in cytokinesis through interaction with Mlc1p
	CAGL0F06435g	2.54825763422474		Ortholog(s) have tRNA-intron endonuclease activity, role in tRNA-type intron splice site recognition and cleavage and tRNA-intron endonuclease complex localization	C1_03900W	SEN15	Similar to delta subunit of tRNA splicing endonuclease; increased transcription is observed upon fluphenazine treatment	YMR059W	SEN15	Subunit of the tRNA splicing endonuclease; tRNA splicing endonuclease (Sen complex) is composed of Sen2p, Sen15p, Sen34p, and Sen54p; Sen complex also cleaves the CBP1 mRNA at the mitochondrial surface
	CAGL0G10109g	2.55266061653806		Ortholog(s) have RNA polymerase III activity, role in tRNA transcription from RNA polymerase III promoter and DNA-directed RNA polymerase III complex, mitotic spindle pole body localization	CR_02890C		Ortholog(s) have RNA polymerase III activity, role in tRNA transcription from RNA polymerase III promoter and DNA-directed RNA polymerase III complex, mitotic spindle pole body localization	YPR190C	RPC82	RNA polymerase III subunit C82
	CAGL0H04807g	2.55492692089241		Ortholog(s) have tRNA (uracil) methyltransferase activity and role in cellular response to drug, chronological cell aging, regulation of translational elongation, tRNA methylation, tRNA wobble uridine modification	CR_08180C	TRM9	Putative tRNA methyltransferase; repressed during the mating process	YML014W	TRM9	tRNA methyltransferase; catalyzes modification of wobble bases in tRNA anticodons to 2, 5-methoxycarbonylmethyluridine and 5-methoxycarbonylmethyl-2-thiouridine; may act as part of a complex with Trm112p; deletion mutation increases translational infidelity, including amino acid misincorporation and -1 frameshifting, and also confers resistance to zymocin; null mutant displays activation of stres…
	CAGL0K08888g	2.55702460238659		Ortholog(s) have guanyl-nucleotide exchange factor activity, translation initiation factor activity	CR_03990C	GCD1	Putative translation initiation factor; transcript regulated by Mig1; repressed upon phagocytosis by murine macrophage	YOR260W	GCD1	Gamma subunit of the translation initiation factor eIF2B; the guanine-nucleotide exchange factor for eIF2; activity subsequently regulated by phosphorylated eIF2; first identified as a negative regulator of GCN4 expression
	CAGL0C02343g	2.57143390391015	ARB1	Ortholog(s) have ATPase activity, uncoupled activity, role in cellular response to drug, ribosomal small subunit export from nucleus and cytosol, nucleus, preribosome, large subunit precursor, ribosome localization	C2_08000C	KRE30	YEF3-subfamily ABC family protein; predicted not to be a transporter; repressed in core stress response; mutation confers hypersensitivity to amphotericin B	YER036C	ARB1	ATPase of the ATP-binding cassette (ABC) family; involved in 40S and 60S ribosome biogenesis, has similarity to Gcn20p; shuttles from nucleus to cytoplasm, physically interacts with Tif6p, Lsg1p; human homolog ABCF2 can complement yeast ARB1 mutant
	CAGL0G02167g	2.57425094443641		Ortholog(s) have 3'-tRNA processing endoribonuclease activity, role in mitochondrial tRNA 3'-end processing, nuclear tRNA 3'-trailer cleavage, endonucleolytic and mitochondrion, nucleus localization	C3_00420W		Ortholog(s) have 3'-tRNA processing endoribonuclease activity, role in mitochondrial tRNA 3'-end processing, nuclear tRNA 3'-trailer cleavage, endonucleolytic and mitochondrion, nucleus localization	YKR079C	TRZ1	tRNA 3'-end processing endonuclease tRNase Z; also localized to mitochondria and interacts genetically with Rex2 exonuclease; homolog of the human candidate prostate cancer susceptibility gene ELAC2
	CAGL0J03388g	2.58102065345784		Ortholog(s) have ATP-dependent 3'-5' RNA helicase activity, RNA binding, polynucleotide adenylyltransferase activity, protein binding, bridging activity	C1_09790C		Ortholog(s) have ATP-dependent 3'-5' RNA helicase activity, RNA binding, polynucleotide adenylyltransferase activity, protein binding, bridging activity	YDL175C	AIR2	RNA-binding subunit of the TRAMP nuclear RNA surveillance complex; involved in nuclear RNA processing and degradation; involved in TRAMP complex assembly as a bridge between Mtr4p and Trf4p; stimulates the poly(A) polymerase activity of Pap2p in vitro; has 5 zinc knuckle motifs; AIR2 has a paralog, AIR1, that arose from the whole genome duplication; Air2p and Air1p have nonredundant roles in regu…
	CAGL0B02387g	2.5824208830067		Ortholog(s) have poly(A)-specific ribonuclease activity and role in polyadenylation-dependent RNA catabolic process				YML118W	NGL3	3'-5' exonuclease specific for poly-A RNAs; has a domain similar to a magnesium-dependent endonuclease motif in mRNA deadenylase Ccr4p; similar to Ngl1p; NGL3 has a paralog, NGL2, that arose from the whole genome duplication
	CAGL0K08360g	2.59547207470297		Ortholog(s) have double-stranded DNA 5'-3' exodeoxyribonuclease activity, single-stranded DNA endodeoxyribonuclease activity, tRNA (m5U54) methyltransferase activity and role in double-strand break repair, tRNA modification	C1_01380C	TRM2	Putative tRNA methyltransferase; repressed by prostaglandins; Spider biofilm induced	YKR056W	TRM2	tRNA methyltransferase; 5-methylates the uridine residue at position 54 of tRNAs and may also have a role in tRNA stabilization or maturation; endo-exonuclease with a role in DNA repair
	CAGL0C01925g	2.59832130301602		Ortholog(s) have GDP binding, RNA pyrophosphohydrolase activity, role in mRNA catabolic process, positive regulation of exoribonuclease activity and cytosol, nucleus localization
	CAGL0G03443g	2.61912338525347		Ortholog(s) have nuclear localization sequence binding, protein transporter activity and role in NLS-bearing protein import into nucleus, regulation of pseudohyphal growth, ribosomal protein import into nucleus	C1_05630C		Putative karyopherin beta; repressed by nitric oxide	YER110C	KAP123	Karyopherin beta; mediates nuclear import of ribosomal proteins prior to assembly into ribosomes and import of histones H3 and H4; localizes to the nuclear pore, nucleus, and cytoplasm; exhibits genetic interactions with RAI1
	CAGL0H10406g	2.63809848818647		Ortholog(s) have tRNA (guanine) methyltransferase activity, role in tRNA methylation and cytoplasm localization	C4_03830W		Predicted tRNA (guanine) methyltransferase activity; Spider biofilm induced	YDL112W	TRM3	2'-O-ribose methyltransferase; catalyzes the ribose methylation of the guanosine nucleotide at position 18 of tRNAs
	CAGL0G09757g	2.64879513141286		Has domain(s) with predicted DNA binding, RNA polymerase II transcription factor activity, sequence-specific DNA binding, zinc ion binding activity and role in regulation of transcription, DNA-templated, transcription, DNA-templated
	CAGL0J07458g	2.69444093578568		Ortholog(s) have role in exonucleolytic trimming to generate mature 3'-end of 5.8S rRNA from tricistronic rRNA transcript (SSU-rRNA, 5.8S rRNA and LSU-rRNA), more	C1_03830C		Ortholog(s) have role in exonucleolytic trimming to generate mature 3'-end of 5.8S rRNA from tricistronic rRNA transcript (SSU-rRNA, 5.8S rRNA and LSU-rRNA), more	YNL232W	CSL4	Exosome non-catalytic core component; involved in 3'-5' RNA processing and degradation in both the nucleus and the cytoplasm; predicted to contain an S1 RNA binding domain; human homolog EXOSC1 partially complements yeast csl4 null mutant, and can complement inviability of strain in which expression of CSL4 is repressed
	CAGL0L02893g	2.69710942921591		Ortholog(s) have role in maturation of SSU-rRNA and mitochondrial inner membrane localization	C3_07550C		Protein required for mitochondrial ribosome small subunit biogenesis; role in maturation of SSU-rRNA; Spider biofilm induced	YOR205C	GEP3	Protein required for mitochondrial ribosome small subunit biogenesis; null mutant is defective in respiration and in maturation of 15S rRNA; protein is localized to the mitochondrial inner membrane; null mutant interacts synthetically with prohibitin (Phb1p)
	CAGL0L10120g	2.70320429552489		Ortholog(s) have 5'-3' exoribonuclease activity, mRNA binding, microtubule binding, recombinase activity	C4_01080W	RAT1	5'-->3' exoribonuclease; similar to S. cerevisiae nuclear exoribonuclease Rat1p; suppresses S. cerevisiae kem1 mutant slow growth, mating defect, and haploid invasive growth defect	YOR048C	RAT1	Nuclear 5' to 3' single-stranded RNA exonuclease; involved in RNA metabolism, including rRNA and snoRNA processing, as well as poly (A+) dependent and independent mRNA transcription termination; required for cotranscriptional pre-rRNA cleavage; displaces Cdk1p from elongating transcripts, especially as RNAPII reaches the poly(A) site, negatively regulates phosphorylation of the CTD of RNAPII, and…
	CAGL0C02541g	2.71134786427756		Ortholog(s) have TFIID-class transcription factor binding, chromatin binding, core promoter binding, lysine-acetylated histone binding activity	C5_00200C	BDF1	Bromodomain transcription factor; repressed upon adherence to polystyrene; reduced mRNA abundance detected in null mutant; macrophage/pseudohyphal-repressed; possibly essential, disruptants not obtained by UAU1 method	YLR399C	BDF1	Protein involved in transcription initiation; functions at TATA-containing promoters; associates with the basal transcription factor TFIID; contains two bromodomains; corresponds to the C-terminal region of mammalian TAF1; redundant with Bdf2p; BDF1 has a paralog, BDF2, that arose from the whole genome duplication
	CAGL0I02376g	2.71946185410449		Has domain(s) with predicted role in ribosomal small subunit biogenesis and 90S preribosome localization
	CAGL0M05885g	2.72823911258545		Ortholog(s) have endonuclease activity and role in cellular response to drug, cleavage in ITS2 between 5.8S rRNA and LSU-rRNA of tricistronic rRNA transcript (SSU-rRNA, 5.8S rRNA, LSU-rRNA)	C2_06000W	LAS1	Putative bud formation and morphogenesis protein; mutation confers hypersensitivity to 5-fluorocytosine (5-FC), 5-fluorouracil (5-FU); macrophage-induced; Spider biofilm induced	YKR063C	LAS1	Endonuclease involved in pre-rRNA processing at both ends of ITS2; functions with Grc3p in a conserved mechanism to modulate rRNA processing and ribosome biogenesis; may coordinate the action of the Rat1p-Rai1p exoRNAse; required for the G1/S cell cycle transition; human ortholog is Las1L; mutants require the SSD1-v allele for viability
	CAGL0G05874g	2.73152562367321		Ortholog(s) have RNA polymerase I activity, RNA polymerase II activity, RNA polymerase III activity, RNA-directed 5'-3' RNA polymerase activity, zinc ion binding activity	C1_14390W	RPC10	Putative RNA polymerase subunit ABC10-alpha of RNA polymerase complexes I, II, and III; flucytosine induced; Spider biofilm induced	YHR143W-A	RPC10	RNA polymerase subunit ABC10-alpha, found in RNA pol I, II, and III; relocalizes from nucleolus to cytoplasm upon DNA replication stress
	CAGL0B04301g	2.73314439659013		Ortholog(s) have ribosomal protein S6 kinase activity, role in TORC1 signaling and cytosol localization
	CAGL0L13398r	2.75203797819382	RDN18-1	18S rRNA
	CAGL0M09977g	2.76646946456062		Ortholog(s) have mRNA binding, tRNA dihydrouridine synthase activity, role in tRNA modification and cytoplasm, nuclear periphery localization	C2_02420C		Protein of unknown function	YLR401C	DUS3	Dihydrouridine synthase; member of a widespread family of conserved proteins including Smm1p, Dus1p, and Dus4p; contains a consensus oleate response element (ORE) in its promoter region; forms nuclear foci upon DNA replication stress
	CAGL0M01232g	2.8126269050374		Ortholog(s) have role in rescue of stalled ribosome, ribosome-associated ubiquitin-dependent protein catabolic process and RQC complex, cytoplasm, cytosolic large ribosomal subunit localization	C2_07610C		Ortholog(s) have role in rescue of stalled ribosome, ribosome-associated ubiquitin-dependent protein catabolic process and RQC complex, cytosol, cytosolic large ribosomal subunit localization	YDR333C	RQC1	Component of the ribosome quality control complex (RQC); RQC (Rqc1p-Rkr1p-Tae2p-Cdc48p-Npl4p-Ufd1p) is a ribosome-bound complex required for the degradation of polypeptides arising from stalled translation; required along with Rkr1p for recruitment of the Cdc48p-Npl4p-Ufd1p AAA ATPase complex to the RQC
	CAGL0K01441g	2.81912408343279		Ortholog(s) have RNA binding activity, role in spliceosomal complex assembly and U2-type prespliceosome localization	C1_08660C		Ortholog(s) have RNA binding activity, role in spliceosomal complex assembly and U2-type prespliceosome localization	YDL043C	PRP11	Subunit of the SF3a splicing factor complex; required for spliceosome assembly
	CAGL0L12672g	2.84294597817906		Ortholog(s) have mRNA binding activity, role in cellular response to drug, maturation of LSU-rRNA from tricistronic rRNA transcript (SSU-rRNA, 5.8S rRNA, LSU-rRNA) and nucleolus, preribosome, large subunit precursor localization	C1_04390C	NOP4	Putative nucleolar protein; Hap43-induced; mutation confers hypersensitivity to 5-fluorocytosine (5-FC), 5-fluorouracil (5-FU), and tubercidin (7-deazaadenosine); represses in core stress response	YPL043W	NOP4	Nucleolar protein; essential for processing and maturation of 27S pre-rRNA and large ribosomal subunit biogenesis; constituent of 66S pre-ribosomal particles; contains four RNA recognition motifs (RRMs)
	CAGL0E01023g	2.85202383641471		Ortholog(s) have RNA binding activity, role in mRNA cis splicing, via spliceosome and Prp19 complex, U2-type spliceosomal complex, post-mRNA release spliceosomal complex localization	C1_12630C		Protein involved in pre-mRNA splicing; Spider biofilm induced	YDR163W	CWC15	Non-essential protein involved in pre-mRNA splicing; component of a complex containing Cef1p; has similarity to S. pombe Cwf15p
	CAGL0C03531g	2.8640930648528		Ortholog(s) have protein methyltransferase activity, rRNA (guanine) methyltransferase activity, tRNA (guanine-N2-)-methyltransferase activity	C2_08840W		Putative tRNA methyltransferase complex subunit; regulated by Gcn4; repressed in response to amino acid starvation (3-aminotriazole treatment); Spider biofilm induced	YNR046W	TRM112	Protein involved in methylation of tRNA, rRNA, and translation factors; also involved in ribosome biogenesis; subunit of tRNA methyltransferase (MTase) complexes in combination with Trm9p and Trm11p; N7-methylates G1575 of 18S rRNA as complex with Bud23p; subunit of complex with Mtq2p that methylates Sup45p (eRF1) in the ternary complex eRF1-eRF3-GTP; relative distribution to the nucleus increase…
	CAGL0G03003g	2.87729338654742		Ortholog(s) have role in rRNA processing, response to drug, tRNA export from nucleus and CURI complex, UTP-C complex, small-subunit processome localization	C2_02450C	UTP22	Putative U3 snoRNP protein; Ssr1-induced; repressed by prostaglandins; heterozygous null mutant is resistant to parnafungin	YGR090W	UTP22	Component of the small-subunit processome; required for nuclear export of tRNAs; may facilitate binding of Utp8p to aminoacylated tRNAs and their delivery to Los1p for export; conserved from yeast to mammals
	CAGL0E05434g	2.88072845914292		Ortholog(s) have sequence-specific DNA binding activity	C3_05470W	TEA1	Putative transcription factor with zinc cluster DNA-binding motif; has similarity to S. cerevisiae Tea1p; Hap43p-repressed gene	YOR337W	TEA1	Ty1 enhancer activator involved in Ty enhancer-mediated transcription; required for full levels of Ty enhancer-mediated transcription; C6 zinc cluster DNA-binding protein
	CAGL0G08294g	2.8920796945847		Ortholog(s) have role in RNA polymerase II complex import to nucleus, RNA polymerase III complex localization to nucleus, mitotic sister chromatid cohesion and cytosol, nucleus localization	C4_06790W		Ortholog of S. cerevisiae Gpn3 a GTPase with a role in biogenesis of RNA pol II and polIII; possibly an essential gene, disruptants not obtained by UAU1 method	YLR243W	GPN3	Putative GTPase with a role in biogenesis of RNA pol II and polIII; may be involved in assembly of RNA polymerases II and III and in their transport into the nucleus; may have a role in sister chromatid cohesion; SWAT-GFP and mCherry fusion proteins localize to the endoplasmic reticulum and vacuole respectively; contains a Gly-Pro-Asn motif in the G domain; similar to Npa3p and Gpn2p
	CAGL0E02717g	2.89742693675358		Ortholog(s) have transferase activity, role in maturation of SSU-rRNA and cytoplasm, nucleus localization	C2_03000C		Ortholog(s) have transferase activity, role in maturation of SSU-rRNA and cytoplasm, nucleus localization	YOR006C	TSR3	Protein required for 20S pre-rRNA processing; involved in processing of the 20S pre-rRNA at site D to generate mature 18S rRNA; green fluorescent protein (GFP)-fusion protein localizes to both the cytoplasm and the nucleus; relative distribution to the nucleus increases upon DNA replication stress
	CAGL0K01089g	2.90916126220195		Ortholog(s) have role in maturation of SSU-rRNA from tricistronic rRNA transcript (SSU-rRNA, 5.8S rRNA, LSU-rRNA), ribosomal small subunit export from nucleus	C2_06850W		Ortholog of Slx9 required for pre-rRNA processing; associated with 90S pre-ribosome and 43S small ribosomal subunit precursor, interacts with U3 snoRNA in S. cerevisiae; gene has intron; Spider biofilm induced	YGR081C	SLX9	Protein required for pre-rRNA processing; associated with the 90S pre-ribosome and 43S small ribosomal subunit precursor; interacts with U3 snoRNA; deletion mutant has synthetic fitness defect with an sgs1 deletion mutant
	CAGL0J00209g	2.91663645699969		Ortholog(s) have tRNA guanylyltransferase activity, role in tRNA modification and cytosol, nucleus localization	C7_00560C	THG1	tRNA guanylyltransferase, with role in tRNA modification; catalyzes reverse (3'-5') nucleotide polymerization	YGR024C	THG1	tRNAHis guanylyltransferase; adds a guanosine residue to the 5' end of tRNAH is after transcription and RNase P cleavage; can also catalyze reverse (3'-5') polymerization with certain substrates in a template-dependent reaction; couples nuclear division and migration to cell budding and cytokinesis; essential enzyme conserved among eukaryotes
	CAGL0H10252g	2.94963427702767		Ortholog(s) have tRNA methyltransferase activity, role in cytoplasmic translation, tRNA methylation and cytosol, nucleus localization	C3_07400W		Ortholog(s) have tRNA methyltransferase activity, role in cytoplasmic translation, tRNA methylation and cytosol, nucleus localization	YBR061C	TRM7	2'-O-ribose methyltransferase; methylates the 2'-O-ribose of tRNA-Phe, tRNA-Trp, and tRNA-Leu at positions C32 and N34 of tRNA anticodon loop; crucial biological role likely modification of tRNA-Phe; interacts with Trm732p and Rtt10p in 2'-O-methylation of C32 and N34 substrate tRNAs, respectively; yeast null mutant can be functionally complemented by human FTSJ1, mutations in which have been imp…
	CAGL0M05159g	2.96754481143702		Ortholog(s) have RNA stem-loop binding, RNA-directed 5'-3' RNA polymerase activity, double-stranded RNA binding, ribonuclease III activity	C4_04830W	DCR1	Putative Dicer RNAse involved in RNA interference, similar to S. cerevisiae Rnt1p but orthologous to S. castellii Dcr1p, which is not conserved in S. cerevisiae	YMR239C	RNT1	Nuclear dsRNA-specific ribonuclease (RNase III); involved in rDNA transcription, rRNA processing and U2 snRNA 3' end formation by cleavage of a stem-loop structure at the 3' end of U2 snRNA; involved in polyadenylation-independent transcription termination; involved in the cell wall stress response, regulating the degradation of cell wall integrity and morphogenesis checkpoint genes
	CAGL0H05863g	2.99075434217841		Ortholog(s) have ATPase activity, tRNA binding activity, role in regulation of transcription from RNA polymerase II promoter, tRNA wobble uridine modification and Elongator holoenzyme complex, cytosol, nucleus localization	C1_12570C		Putative elongator complex subunit; for modification of wobble nucleosides in tRNA; Spider biofilm induced	YPL101W	ELP4	Subunit of hexameric RecA-like ATPase Elp456 Elongator subcomplex; which is required for modification of wobble nucleosides in tRNA; required for Elongator structural integrity; null mutation is functionally complemented by human ELP4
	CAGL0C03355g	3.01575416105567		Ortholog(s) have ATPase activator activity, RNA binding activity	C5_02070C		Ortholog(s) have ATPase activator activity, RNA binding activity	YNR054C	ESF2	Essential nucleolar protein involved in pre-18S rRNA processing; binds to RNA and stimulates ATPase activity of Dbp8; involved in assembly of the small subunit (SSU) processome
	CAGL0G09218g	3.03226844572212		Ortholog(s) have role in box C/D snoRNP assembly, ribosomal large subunit assembly and nucleoplasm localization	C3_02670W		Protein with a predicted role in 60S ribosomal subunit assembly; flow model biofilm induced	YPL193W	RSA1	Protein involved in the assembly of 60S ribosomal subunits; functionally interacts with Dbp6p; functions in a late nucleoplasmic step of the assembly
	CAGL0D02816g	3.04074908028089		Ortholog(s) have polynucleotide 5'-hydroxyl-kinase activity	CR_06450W		Ortholog(s) have polynucleotide 5'-hydroxyl-kinase activity	YLL035W	GRC3	Polynucleotide kinase present on rDNA; required for efficient transcription termination by RNA polymerase I; functions with Las1p in a conserved mechanism to modulate rRNA processing and ribosome biogenesis; required for cell growth; mRNA is cell-cycle regulated
	CAGL0D02970g	3.08129682909678		Ortholog(s) have role in mRNA export from nucleus, mRNA splicing, via spliceosome, maintenance of RNA location and RES complex, cytoplasm localization				YLR016C	PML1	Subunit of the RES complex; RES complex is required for nuclear retention of unspliced pre-mRNAs; acts in the same pathway as Pml39p and Mlp1p
	CAGL0H04235g	3.0903436790355		Ortholog(s) have tRNA dihydrouridine synthase activity, role in tRNA modification and mitochondrion, nucleus localization	C2_09500W		Predicted tRNA dihydrouridine synthase; Spider biofilm induced	YML080W	DUS1	Dihydrouridine synthase; member of a widespread family of conserved proteins including Smm1p, Dus3p, and Dus4p; modifies pre-tRNA(Phe) at U17
	CAGL0M03619g	3.09642580048809		Ortholog(s) have pseudouridine synthase activity, role in mRNA pseudouridine synthesis, tRNA modification and mitochondrion, nucleus localization	C5_01180W	PUS4	Putative pseudouridine synthase; transcript regulated by Nrg1, Mig1, and Tup1	YNL292W	PUS4	Pseudouridine synthase; catalyzes only the formation of pseudouridine-55 (Psi55), a highly conserved tRNA modification, in mitochondrial and cytoplasmic tRNAs; also responsible for pseudouracil modification of some mRNAs; PUS4 overexpression leads to translational derepression of GCN4 (Gcd- phenotype)
	CAGL0H02673g	3.09840081360002		Ortholog(s) have role in maturation of SSU-rRNA from tricistronic rRNA transcript (SSU-rRNA, 5.8S rRNA, LSU-rRNA) and 90S preribosome, nucleolus localization	C2_04700C		Putative ortholog of S. cerevisiae Utp30; a U3-containing 90S preribosome complex protein; Hap43-induced; Spider biofilm induced	YKR060W	UTP30	Putative subunit of U3-containing 90S preribosome complex; complex is involved in production of 18S rRNA and assembly of small ribosomal subunit
	CAGL0J07986g	3.11911768029855		Ortholog(s) have role in ribosomal large subunit biogenesis, translational initiation and cytoplasm, nucleus localization	CR_06980W		Putative protein of unknown function; Hap43-induced; repressed by Rim101; Spider biofilm induced	YNL260C	LTO1	Essential protein that forms a complex with Rli1p and Yae1p; ortholog of human ORAOV1, which is overexpressed in solid tumors; inviability of null mutant under standard conditions is complemented by overexpression of ORAOV1; essential for growth under standard (aerobic) conditions but not under anaerobic conditions; may have a role in protection of ribosomal assembly and function from damage due …
	CAGL0J08679g	3.14250406863301		Ortholog(s) have mRNA binding activity, role in cytoplasmic translation and cytoplasm, polysomal ribosome localization	C3_01520C		Ortholog(s) have mRNA binding activity, role in cytoplasmic translation, poly(A)+ mRNA export from nucleus and cytosol, polysomal ribosome localization	YOR091W	TMA46	Protein of unknown function that associates with translating ribosomes; interacts with GTPase Rbg1p
	CAGL0H10384g	3.15641420275997		Ortholog(s) have role in exonucleolytic trimming to generate mature 3'-end of 5.8S rRNA from tricistronic rRNA transcript (SSU-rRNA, 5.8S rRNA, LSU-rRNA), nuclear polyadenylation-dependent tRNA catabolic process, rRNA catabolic process	C4_03840C	RRP42	Putative exosome non-catalytic core component; involved in 3'-5' RNA processing; rat catheter biofilm induced	YDL111C	RRP42	Exosome non-catalytic core component; involved in 3'-5' RNA processing and degradation in both the nucleus and the cytoplasm; has similarity to E. coli RNase PH and to human hRrp42p (EXOSC7)
	CAGL0M02145g	3.16473167065799		Ortholog(s) have RNA trimethylguanosine synthase activity and role in 7-methylguanosine cap hypermethylation, meiotic nuclear division, nucleologenesis, regulation of telomere maintenance via telomerase, tRNA processing	C2_07360W		Ortholog(s) have RNA methyltransferase activity, role in 7-methylguanosine cap hypermethylation, meiotic nuclear division, nucleologenesis, regulation of telomere maintenance via telomerase, tRNA processing and nucleolus localization	YPL157W	TGS1	Trimethyl guanosine synthase, conserved nucleolar methyl transferase; converts the m(7)G cap structure of snRNAs, snoRNAs, and telomerase TLC1 RNA to m(2,2,7)G; also required for nucleolar assembly and splicing of meiotic pre-mRNAs; interacts with Swm2p, which may confer substrate specificity on Tgs1p
	CAGL0L12408g	3.16859682836866		Ortholog(s) have tRNA (uracil) methyltransferase activity, role in tRNA methylation and cytosol, nucleus localization	C1_04530C		Putative tRNA U44 2'-O-methyltransferase; virulence-group-correlated expression; induced during oral infection; mutants have reduced ability to damage oral epithelial cells; early-stage flow model biofilm induced	YPL030W	TRM44	tRNA(Ser) Um(44) 2'-O-methyltransferase; involved in maintaining levels of the tRNA-Ser species tS(CGA) and tS(UGA); conserved among metazoans and fungi but there does not appear to be a homolog in plants; TRM44 is a non-essential gene
	CAGL0K07700g	3.17328488338283		Ortholog(s) have role in RNA Polymerase I assembly, RNA Polymerase II core complex assembly, RNA Polymerase III assembly, formation of translation preinitiation complex and cytoplasm, cytosolic ribosome localization	C5_02010C		Ortholog(s) have role in RNA Polymerase I assembly, RNA Polymerase II core complex assembly, RNA Polymerase III assembly, formation of translation preinitiation complex and cytoplasm, cytosolic ribosome localization	YFL023W	BUD27	Unconventional prefoldin protein involved in translation initiation; required for correct assembly of RNAP I, II, and III in an Rpb5p-dependent manner; shuttles between nucleus and cytoplasm; mutants have inappropriate expression of nutrient sensitive genes due to translational derepression of Gcn4p transcription factor; diploid mutants show random budding; ortholog of human URI/RMP
	CAGL0A01958g	3.1822643683246		Ortholog(s) have role in maturation of SSU-rRNA and cytosol, nucleolus localization	C7_02930C		Ortholog(s) have role in maturation of SSU-rRNA and cytosol, nucleolus localization	YOL022C	TSR4	Cytoplasmic protein required for correct processing of 20S pre-rRNA; protein required for processing of the 20S pre-rRNA at site D to generate mature 18S rRNA; essential gene in S288C background but not in CEN.PK2
	CAGL0A04037g	3.19622780418328		Ortholog(s) have role in rRNA processing and cytosol, nucleolus localization	C4_01450W	PWP1	Putative rRNA processing protein; Hap43-induced; repressed in core stress response	YLR196W	PWP1	Protein with WD-40 repeats involved in rRNA processing; associates with trans-acting ribosome biogenesis factors; similar to beta-transducin superfamily
	CAGL0L02915g	3.20228684088826		Ortholog(s) have ATP-dependent RNA helicase activity, RNA strand annealing activity, mRNA binding, translation initiation factor activity and role in cytoplasmic translational initiation, spliceosomal complex disassembly	C3_06100C	DED1	Predicted ATP-dependent RNA helicase; RNA strand annealing activity; Spider biofilm induced	YOR204W	DED1	ATP-dependent DEAD (Asp-Glu-Ala-Asp)-box RNA helicase; required for translation initiation of all yeast mRNAs; binds to mRNA cap-associated factors, and binding stimulates Ded1p RNA-dependent ATPase activity; mutation in human homolog DBY is associated with male infertility; human homolog DDX3X complements ded1 null mutation; DED1 has a paralog, DBP1, that arose from the whole genome duplication
	CAGL0H05093g	3.20407369298333		Ortholog(s) have tRNA binding activity, role in regulation of transcription from RNA polymerase II promoter, tRNA wobble uridine modification and Elongator holoenzyme complex, cytosol, nucleus localization	C4_05260W		Subunit of Elongator complex; required for modification of wobble nucleosides in tRNA in S. cerevisiae; Hap43-induced gene	YLR384C	IKI3	Subunit of Elongator complex; Elongator is required for modification of wobble nucleosides in tRNA; maintains structural integrity of Elongator; homolog of human IKAP, mutations in which cause familial dysautonomia (FD)
	CAGL0K02497g	3.20742985965529	TIF6	Translation initiation factor 6 (eIF6)	CR_07080W		Ortholog of S. cerevisae/S. pombe Tif6; constituent of 66S pre-ribosomal particles; Spider biofilm induced	YPR016C	TIF6	Constituent of 66S pre-ribosomal particles; has similarity to human translation initiation factor 6 (eIF6); may be involved in the biogenesis and or stability of 60S ribosomal subunits
	CAGL0H07975g	3.21656418110151		Ortholog(s) have tRNA binding activity, role in tRNA 3'-trailer cleavage, endonucleolytic and nucleolus, nucleoplasm localization	C1_07500C	LHP1	Ortholog(s) have tRNA binding activity, role in tRNA 3'-trailer cleavage, endonucleolytic and nucleolus, nucleoplasm localization	YDL051W	LHP1	RNA binding protein required for maturation of tRNA and U6 snRNA; acts as a molecular chaperone for RNAs transcribed by polymerase III; homologous to human La (SS-B) autoantigen
	CAGL0K01969g	3.23854454323866		Has domain(s) with predicted transcription factor activity, RNA polymerase I upstream control element sequence-specific binding activity and role in transcription from RNA polymerase I promoter
	CAGL0B01485g	3.24330633028219		Ortholog(s) have tRNA methyltransferase activity, role in tRNA methylation, wybutosine biosynthetic process and cytosol, mitochondrion, nucleus localization	C1_01150C		Ortholog(s) have tRNA methyltransferase activity, role in tRNA methylation, wybutosine biosynthetic process and cytosol, mitochondrion, nucleus localization	YOL141W	PPM2	AdoMet-dependent tRNA methyltransferase; also involved in methoxycarbonylation; required for the synthesis of wybutosine (yW), a modified guanosine found at the 3'-position adjacent to the anticodon of phe-tRNA; similarity to Ppm1p
	CAGL0C00715g	3.24806535733231		Ortholog(s) have role in ribosomal large subunit assembly and nucleolus, preribosome, large subunit precursor localization	C1_04710C		Protein similar to S. cerevisiae Rsa3 predicted nucleolar protein involved in maturation of pre-60S ribosomal particles; rat catheter and Spider biofilm induced	YLR221C	RSA3	Protein with a likely role in ribosomal maturation; required for accumulation of wild-type levels of large (60S) ribosomal subunits; binds to the helicase Dbp6p in pre-60S ribosomal particles in the nucleolus
	CAGL0F09009g	3.25218058939996		Ortholog(s) have role in snoRNA metabolic process and cytoplasm, nucleus localization	C2_07040W		Putative transcription factor with zinc finger DNA-binding motif	YHR040W	BCD1	Essential protein required for the accumulation of box C/D snoRNA
	CAGL0G10043g	3.25228426921475		Ortholog(s) have RNA polymerase I activity, RNA polymerase II activity, RNA polymerase III activity, RNA-directed 5'-3' RNA polymerase activity	C5_03360W	RPO26	Putative RNA polymerase subunit; heterozygous null mutant exhibits resistance to parnafungin in the C. albicans fitness test	YPR187W	RPO26	RNA polymerase subunit ABC23; common to RNA polymerases I, II, and III; part of central core; similar to bacterial omega subunit
	CAGL0F03333g	3.29457905705932		Ortholog(s) have TBP-class protein binding, transcription factor activity, RNA polymerase I upstream control element sequence-specific binding activity				YMR270C	RRN9	Protein involved in promoting high level transcription of rDNA; subunit of UAF (upstream activation factor) for RNA polymerase I
	CAGL0A02772g	3.33144912639209		Ortholog(s) have second spliceosomal transesterification activity and role in generation of catalytic spliceosome for second transesterification step, mRNA 3'-splice site recognition, mRNA branch site recognition	C1_12750C		Pre-mRNA splicing factor; important for catalytic step II of pre-mRNA splicing; possible role in cell cycle progression; Spider biofilm induced	YDR364C	CDC40	Pre-mRNA splicing factor; important for catalytic step II of pre-mRNA splicing and plays a role in cell cycle progression, particularly at the G1/S phase transition; required for DNA synthesis during mitosis and meiosis; has WD repeats; thermosensitivity of the cdc40 null mutant is functionally complemented by a chimeric construct containing the N-terminal 156 amino acids of yeast Cdc40p fused to…
	CAGL0D05500g	3.3727639710613		Ortholog(s) have cytoplasm, nucleus localization	C4_02050W	HGH1	Putative HMG1/2-related protein; transcript regulated by Mig1	YGR187C	HGH1	Nonessential protein of unknown function; predicted to be involved in ribosome biogenesis; green fluorescent protein (GFP)-fusion protein localizes to the cytoplasm; similar to mammalian BRP16 (Brain protein 16); relative distribution to the nucleus increases upon DNA replication stress
	CAGL0F09075g	3.40418817955222		Ortholog(s) have protein serine/threonine kinase activity	C2_03940C	SCH9	Protein kinase; involved in growth control, cell size, resistance to rapamycin, cations, chlamydospore formation, filamentous growth under some conditions, and virulence; prevents hyphal growth in hypoxia at high CO2; Spider biofilm induced	YHR205W	SCH9	AGC family protein kinase; functional ortholog of mammalian S6 kinase; phosphorylated by Tor1p and required for TORC1-mediated regulation of ribosome biogenesis, translation initiation, and entry into G0 phase; involved in transactivation of osmostress-responsive genes; regulates G1 progression, cAPK activity and nitrogen activation of the FGM pathway; integrates nutrient signals and stress signa…
	CAGL0E05874g	3.4150443446347		Ortholog(s) have GTP binding, GTPase activity, U3 snoRNA binding, mRNA binding activity	C3_01000W	BMS1	Putative GTPase; Hap43-induced gene; mutation confers resistance to 5-fluorocytosine (5-FC); flucytosine induced; repressed by prostaglandins; Spider biofilm induced	YPL217C	BMS1	GTPase required for ribosomal subunit synthesis and rRNA processing; required for synthesis of 40S ribosomal subunits and for processing the 35S pre-rRNA at sites A0, A1, and A2; interacts with Rcl1p, which stimulates its GTPase and U3 snoRNA binding activities; has similarity to Tsr1p
	CAGL0E05764g	3.41631502795232		Ortholog(s) have mRNA binding, pseudouridine synthase activity, role in mRNA pseudouridine synthesis, snRNA pseudouridine synthesis, tRNA pseudouridine synthesis and nucleus localization	C6_02350C		Putative pseudouridine synthase; predicted role in snRNA pseudouridine synthesis, tRNA pseudouridine synthesis; Spider biofilm induced	YPL212C	PUS1	tRNA:pseudouridine synthase; introduces pseudouridines at positions 26-28, 34-36, 65, and 67 of tRNA; also acts on U2 snRNA; also pseudouridylates some mRNAs, and pseudouridylation level varies with growth phase; nuclear protein that appears to be involved in tRNA export; PUS1 has a paralog, PUS2, that arose from the whole genome duplication
	CAGL0I07799g	3.42161509559979		Ortholog(s) have DNA-directed 5'-3' RNA polymerase activity and role in transcription from RNA polymerase I promoter, transcription from RNA polymerase II promoter, transcription from RNA polymerase III promoter
	CAGL0J09614g	3.42893501402686		Ortholog(s) have box H/ACA snoRNA binding activity, role in cleavage involved in rRNA processing, rRNA pseudouridine synthesis, snRNA pseudouridine synthesis and box H/ACA snoRNP complex localization	CR_04360C	NHP2	Putative H/ACA snoRNP protein; macrophage/pseudohyphal-induced	YDL208W	NHP2	Protein related to mammalian high mobility group (HMG) proteins; nuclear protein; essential for function of H/ACA-type snoRNPs, which are involved in 18S rRNA processing
	CAGL0G09317g	3.45892405172301		Ortholog(s) have role in U1 snRNA 3'-end processing, U4 snRNA 3'-end processing and U5 snRNA 3'-end processing, more	C4_02090C		Ortholog(s) have role in U1 snRNA 3'-end processing, U4 snRNA 3'-end processing and U5 snRNA 3'-end processing, more	YGR195W	SKI6	Exosome non-catalytic core component; involved in 3'-5' RNA processing and degradation in both the nucleus and the cytoplasm; has similarity to E. coli RNase PH and to human hRrp41p (EXOSC4)
	CAGL0E05676g	3.4733672527574		Ortholog(s) have role in wybutosine biosynthetic process and endoplasmic reticulum localization	C6_02290C		Putative flavodoxin; similar to S. cerevisiae Tyw1, an iron-sulfur protein required for synthesis of wybutosine modified tRNA; predicted Kex2p substrate; Spider biofilm induced	YPL207W	TYW1	Iron-sulfer protein required for synthesis of Wybutosine modified tRNA; Wybutosine is a modified guanosine found at the 3'-position adjacent to the anticodon of phenylalanine tRNA which supports reading frame maintenance by stabilizing codon-anticodon interactions; induction by Yap5p in response to iron provides protection from high iron toxicity; overexpression results in increased cellular iron
	CAGL0M01474g	3.50648266690997		Ortholog(s) have RNA polymerase II transcription factor activity, TBP-class protein binding, RNA polymerase II transcription factor activity and TBP-class protein binding, more	C2_02810C	NCB2	Beta subunit of NC2, heterodimeric regulator of transcription; activates CDR1 transcription; possibly an essential gene, disruptants not obtained by UAU1 method; conditional mutants show decreased susceptibility to azoles	YDR397C	NCB2	Subunit of a heterodimeric NC2 transcription regulator complex; complex binds to TBP and can repress transcription by preventing preinitiation complex assembly or stimulate activated transcription; homologous to human NC2beta; complex also includes Bur6p
	CAGL0A00935g	3.51029547183991		Ortholog(s) have role in generation of catalytic spliceosome for first transesterification step, snoRNA splicing and U2-type spliceosomal complex localization	C2_00280C		Putative pre-mRNA-splicing factor; possibly an essential gene, disruptants not obtained by UAU1 method	YLR323C	CWC24	General splicing factor; required for stable U2 snRNP binding to primary transcripts; essential for the first step of splicing; component of the pre-catalytic spliceosome complex containing Cef1p; similar to S. pombe Cwf24p
	CAGL0J10010g	3.51946886141174		Ortholog(s) have tRNA (adenine-N1-)-methyltransferase activity, role in tRNA methylation and nucleus, tRNA (m1A) methyltransferase complex localization	CR_04160C		Ortholog(s) have tRNA (adenine-N1-)-methyltransferase activity, role in tRNA methylation and nucleus, tRNA (m1A) methyltransferase complex localization	YNL062C	GCD10	Subunit of tRNA (1-methyladenosine) methyltransferase with Gcd14p; required for the modification of the adenine at position 58 in tRNAs, especially tRNAi-Met; first identified as a negative regulator of GCN4 expression
	CAGL0M13431g	3.52317105397965		Ortholog(s) have ATPase activity, tRNA binding activity, role in tRNA modification and Elongator holoenzyme complex, cytoplasm, nucleus localization	C4_03140C		Predicted hexameric RecA-like ATPase Elp456 Elongator subcomplex subunit; required for modification of wobble nucleosides in tRNA; Spider biofilm induced	YHR187W	IKI1	Subunit of hexameric RecA-like ATPase Elp456 Elongator subcomplex; which is required for modification of wobble nucleosides in tRNA; iki1 mutations confer resistance to the K. lactis toxin zymocin
	CAGL0I03234g	3.52777733521421		Ortholog(s) have U3 snoRNA binding, U4 snRNA binding activity and role in mRNA splicing, via spliceosome, maturation of SSU-rRNA from tricistronic rRNA transcript (SSU-rRNA, 5.8S rRNA, LSU-rRNA)	C3_04380C		Putative U3 snoRNP protein; flucytosine induced	YEL026W	SNU13	RNA binding protein; part of U3 snoRNP involved in rRNA processing, part of U4/U6-U5 tri-snRNP involved in mRNA splicing, similar to human 15.5K protein
	CAGL0E00979g	3.54601810366888		Ortholog(s) have tRNA (guanine-N7-)-methyltransferase activity, role in tRNA methylation and cytosol, nucleus, tRNA methyltransferase complex localization	C7_02340C		Ortholog(s) have tRNA (guanine-N7-)-methyltransferase activity, role in tRNA methylation and cytosol, nucleus, tRNA methyltransferase complex localization	YDR165W	TRM82	Catalytic subunit of a tRNA methyltransferase complex; Trm8p and Trm82p comprise an enzyme that catalyzes a methyl-transfer from S-adenosyl-l-methionine to the N(7) atom of guanine at position 46 in tRNA; Trm8 lacks catalytic activity if not bound to Trm82p; relocalizes to the cytosol in response to hypoxia; mutation in human ortholog WDR4 causes microcephalic primordial dwarfism
	CAGL0F01551g	3.56262491758255		Ortholog(s) have role in maturation of SSU-rRNA from tricistronic rRNA transcript (SSU-rRNA, 5.8S rRNA, LSU-rRNA) and nucleolus localization	C5_01480W	FYV5	Protein with a predicted role maturation of 18S rRNA; rat catheter biofilm induced	YLR068W	FYV7	Essential protein required for maturation of 18S rRNA; required for survival upon exposure to K1 killer toxin
	CAGL0F07557g	3.57408728162162		Ortholog(s) have first spliceosomal transesterification activity, role in generation of catalytic spliceosome for first transesterification step and U2-type catalytic step 1 spliceosome localization	C3_00100W		Ortholog(s) have first spliceosomal transesterification activity, role in generation of catalytic spliceosome for first transesterification step and U2-type catalytic step 1 spliceosome, mitotic spindle pole body localization	YKL095W	YJU2	Essential protein required for pre-mRNA splicing; associates transiently with the spliceosomal NTC ("nineteen complex") and acts after Prp2p to promote the first catalytic reaction of splicing
	CAGL0G02409g	3.58073494953106	SRP40	Ortholog(s) have nucleolus localization	CR_02980C	SRP40	Putative chaperone of small nucleolar ribonucleoprotein particles; macrophage/pseudohyphal-induced; rat catheter biofilm induced	YKR092C	SRP40	Nucleolar serine-rich protein; role in preribosome assembly or transport; may function as a chaperone of small nucleolar ribonucleoprotein particles (snoRNPs); immunologically and structurally to rat Nopp140
	CAGL0F03289g	3.58182355058129		Ortholog(s) have double-stranded DNA binding, double-stranded RNA binding, enzyme regulator activity	C1_07960W		Predicted nuclear exosome-associated nucleic acid binding protein; rat catheter and Spider biofilm induced	YHR081W	LRP1	Nuclear exosome-associated nucleic acid binding protein; involved in RNA processing, surveillance, degradation, tethering, and export; forms a stable heterodimer with Rrp6p and regulates its exonucleolytic activity; rapidly degraded by the proteasome in the absence of Rrp6p; homolog of mammalian nuclear matrix protein C1D involved in regulation of DNA repair and recombination
	CAGL0I09790g	3.60965865939818		Ortholog(s) have mRNA binding activity	C6_00370C	NOP5	Ortholog of S. cerevisiae Nop58; involved in pre-rRNA process; Tn mutation affects filamentous growth; macrophage/pseudohyphal-induced; physically interacts with TAP-tagged Nop1; Spider biofilm repressed	YOR310C	NOP58	Protein involved in producing mature rRNAs and snoRNAs; involved in pre-rRNA processing, 18S rRNA synthesis, and snoRNA synthesis; component of the small subunit processome complex, which is required for processing of pre-18S rRNA
	CAGL0E01155g	3.61728074606054		Ortholog(s) have RNA polymerase I activity, role in regulation of cell size, transcription of nuclear large rRNA transcript from RNA polymerase I promoter and DNA-directed RNA polymerase I complex localization				YDR156W	RPA14	RNA polymerase I subunit A14
	CAGL0L02981g	3.61739291138368		Ortholog(s) have role in spliceosomal complex disassembly and U2-type post-mRNA release spliceosomal complex, endoplasmic reticulum localization				YKR022C	NTR2	Essential protein that forms a dimer with Ntr1p; also forms a trimer, with Ntr2p and the DExD/H-box RNA helicase Prp43p, that is involved in spliceosome disassembly
	CAGL0H02497g	3.62879199982352		Ortholog(s) have role in mRNA export from nucleus and cytoplasm, nuclear pore localization				YMR255W	GFD1	Coiled-coiled protein of unknown function; identified as a high-copy suppressor of a dbp5 mutation; protein abundance increases in response to DNA replication stress
	CAGL0C01419g	3.64013857979386		Ortholog(s) have mRNA binding, poly(U) RNA binding activity	C6_02690C		Protein with similarity to S. pombe Nrd1p; transcription induced upon induction of hyphal growth; regulated by Cph1p, Efg1p, Cph2p; low-level expression; alkaline upregulated; fungal-specific (no human or murine homolog)	YPL184C	MRN1	RNA-binding protein that may be involved in translational regulation; binds specific categories of mRNAs, including those that contain upstream open reading frames (uORFs) and internal ribosome entry sites (IRES); interacts genetically with chromatin remodelers and splicing factors, linking chromatin state, splicing and as a result mRNA maturation
	CAGL0M10681g	3.64933818501042		Ortholog(s) have poly(U) RNA binding activity				YNR024W	MPP6	Nuclear exosome-associated RNA binding protein; involved in surveillance of pre-rRNAs and pre-mRNAs, and the degradation of cryptic non-coding RNAs (ncRNA); copurifies with ribosomes; relocalizes to the cytosol in response to hypoxia
	CAGL0A04015g	3.6556999787899		Ortholog(s) have mRNA binding activity, role in rRNA processing and 90S preribosome, box C/D snoRNP complex, small-subunit processome localization	CR_09950C	SIK1	Putative U3 snoRNP protein; Hap43p-induced gene; physically interacts with TAP-tagged Nop1p	YLR197W	NOP56	Essential evolutionarily-conserved nucleolar protein; component of the box C/D snoRNP complexes that direct 2'-O-methylation of pre-rRNA during its maturation; overexpression causes spindle orientation defects
	CAGL0G02629g	3.68479693884184		Ortholog(s) have rRNA (uridine-N3-)-methyltransferase activity, role in rRNA base methylation and nucleolus localization	C3_05860C		Ortholog(s) have rRNA (uridine-N3-)-methyltransferase activity, role in rRNA base methylation and nucleolus localization	YIL096C	BMT5	Methyltransferase required for m3U2634 methylation of the 25S rRNA; S-adenosylmethionine-dependent; associates with precursors of the 60S ribosomal subunit; predicted to be involved in ribosome biogenesis
	CAGL0D06600g	3.68930301794206		Ortholog(s) have protein serine/threonine kinase activity, protein tyrosine kinase activity and role in negative regulation of transcription from RNA polymerase III promoter, peptidyl-serine phosphorylation, protein autophosphorylation	C1_13470W	KNS1	Protein kinase involved in negative regulation of PolIII transcription; effector kinase of the TOR signaling pathway, phosphorylates Rpc53p to regulate ribosome and tRNA biosynthesis; Spider and flow model biofilm induced	YLL019C	KNS1	Protein kinase involved in negative regulation of PolIII transcription; effector kinase of the TOR signaling pathway and phosphorylates Rpc53p to regulate ribosome and tRNA biosynthesis; member of the LAMMER family of protein kinases, which are serine/threonine kinases also capable of phosphorylating tyrosine residues; capable of autophosphorylation
	CAGL0L02799g	3.70992080239273		Ortholog(s) have RNA polymerase I activity, RNA polymerase II activity, RNA polymerase III activity, RNA-directed 5'-3' RNA polymerase activity, zinc ion binding activity	C4_03040W		Ortholog(s) have RNA polymerase I activity, RNA polymerase II activity, RNA polymerase III activity, RNA-directed 5'-3' RNA polymerase activity, zinc ion binding activity	YOR210W	RPB10	RNA polymerase subunit ABC10-beta; common to RNA polymerases I, II, and III
	CAGL0G08041g	3.75506138377167		Ortholog(s) have iron ion binding activity and role in positive regulation of translation, ribosomal large subunit biogenesis, ribosomal subunit export from nucleus, ribosome disassembly, translational initiation, translational termination	C1_03350C	RLI1	Member of RNase L inhibitor (RLI) subfamily of ABC family; predicted not to be a transporter; regulated by Sef1p, Sfu1p, and Hap43p	YDR091C	RLI1	Essential Fe-S protein; required for ribosome biogenesis, translation initiation/termination; facilitates binding of multifactor complex (MFC) of initiation factors to small ribosomal subunit; Dom34-Hbs1 complex and Rli1p work in dissociating inactive ribosomes, thereby facilitating translation restart; forms complex with Lto1p and Yae1p; dependency on ROS-labile FeS clusters, activity in nuclear…
	CAGL0L03377g	3.80296139066009		Ortholog(s) have RNA polymerase II core promoter proximal region sequence-specific DNA binding, transcriptional activator activity, RNA polymerase II core promoter proximal region sequence-specific binding activity	C3_04020C	ZCF16	Predicted Zn(II)2Cys6 transcription factor; mutants are viable; rat catheter biofilm induced	YJL089W	SIP4	C6 zinc cluster transcriptional activator; binds to the carbon source-responsive element (CSRE) of gluconeogenic genes; involved in the positive regulation of gluconeogenesis; regulated by Snf1p protein kinase; localized to the nucleus
	CAGL0F02299g	3.80632793475673		Ortholog(s) have mRNA binding activity	C3_02040C		Ortholog of S. cerevisiae Loc1, a nuclear protein involved in asymmetric localization of ASH1 mRNA in S. cerevisiae; Hap43-induced gene; Spider biofilm induced	YFR001W	LOC1	Nuclear protein involved in asymmetric localization of ASH1 mRNA; binds double-stranded RNA in vitro; constituent of 66S pre-ribosomal particles; required at post-transcriptional step for efficient retrotransposition; absence results in decreased Ty1 Gag:GFP protein levels; relocalizes from nucleus to cytoplasm upon DNA replication stress
	CAGL0D03410g	3.87155440404572		Ortholog(s) have RNA polymerase I CORE element sequence-specific DNA binding, TBP-class protein binding activity and role in transcription of nuclear large rRNA transcript from RNA polymerase I promoter	C2_02630W		Putative transcription factor component of the core factor (CF) rDNA transcription factor complex; Spider biofilm induced	YJL025W	RRN7	Component of the core factor (CF) rDNA transcription factor complex; CF is required for transcription of 35S rRNA genes by RNA polymerase I and is composed of Rrn6p, Rrn7p, and Rrn11p
	CAGL0K09614g	3.88253767935833		Ortholog(s) have rRNA cytidine N-acetyltransferase activity, role in negative regulation of G0 to G1 transition, rRNA acetylation involved in maturation of SSU-rRNA and 90S preribosome, nucleolus localization	CR_04240C		Ortholog of S. cerevisiae Kre33; essential; S. cerevisiae ortholog is essential and is required for biogenesis of the small ribosomal subunit	YNL132W	KRE33	Protein required for biogenesis of the small ribosomal subunit; heterozygous mutant shows haploinsufficiency in K1 killer toxin resistance; essential gene; NAT10, the human homolog, implicated in several types of cancer and premature aging.
	CAGL0E01925g	3.90974049545574		Ortholog(s) have tRNA (guanine-N2-)-methyltransferase activity, role in tRNA methylation and cytosol, nucleus, tRNA (m2G10) methyltransferase complex localization	C3_05140C		Ortholog(s) have tRNA (guanine-N2-)-methyltransferase activity, role in tRNA methylation and cytosol, nucleus, tRNA (m2G10) methyltransferase complex localization	YOL124C	TRM11	Catalytic subunit of adoMet-dependent tRNA methyltransferase complex; required for the methylation of the guanosine nucleotide at position 10 (m2G10) in tRNAs; contains a THUMP domain and a methyltransferase domain; another complex member is Trm112p
	CAGL0I06490g	3.91324938919719		Ortholog(s) have role in ribosomal large subunit biogenesis and nucleolus localization	C1_08870C	JIP5	Ortholog of S. cerevisiae Jip5; predicted role in biogenesis of the large ribosomal subunit; repressed in core stress response; Hap43-induced gene	YPR169W	JIP5	Protein required for biogenesis of the large ribosomal subunit; required for biogenesis of the large ribosomal subunit; interacts with proteins involved in RNA processing, ribosome biogenesis, ubiquitination and demethylation; similar to WDR55, a human WD repeat protein; essential gene
	CAGL0D02706g	3.91826684549765		Ortholog(s) have chromatin binding activity	C4_05230C		Hap43-induced gene; mutation confers hypersensitivity to 5-fluorocytosine (5-FC), 5-fluorouracil (5-FU), and tubercidin (7-deazaadenosine)	YHR197W	RIX1	Component of the Rix1 complex and possibly pre-replicative complexes; required for processing of ITS2 sequences from 35S pre-rRNA; component of the pre-60S ribosomal particle with the dynein-related AAA-type ATPase Mdn1p; required for pre-replicative complex (pre-RC) formation and maintenance during DNA replication licensing; relocalizes to the cytosol in response to hypoxia; essential gene
	CAGL0I03366g	3.9501526889362		Ortholog(s) have ATP binding, nucleoside-triphosphatase activity	C1_00340W	HBR1	Essential protein involved in regulation of MTL gene expression; hemoglobin-regulated inhibitor of white-opaque switching, may affect survival in host; activator of MTLalpha1 and MTLalpha2; transcript activated by hemoglobin	YDL166C	FAP7	Essential NTPase required for small ribosome subunit synthesis; mediates processing of the 20S pre-rRNA at site D in the cytoplasm but associates only transiently with 43S preribosomes via Rps14p; complex with Rps14 is conserved between humans, yeast, and arches; may be the endonuclease for site D; depletion leads to accumulation of pre-40S ribosomes in 80S-like ribosomes; human TAF9 functionally…
	CAGL0F04675r	3.95102708656025	tA(AGC)2	tRNA-Ala, predicted by tRNAscan-SE; AGC anticodon
	CAGL0J05698g	3.983361020316		Ortholog(s) have RNA polymerase III activity, role in tRNA transcription from RNA polymerase III promoter, transcription initiation from RNA polymerase III promoter and DNA-directed RNA polymerase III complex localization	CR_02720C	RPC31	Putative RNA polymerase III subunit C31; repressed by nitric oxide; induced during infection of murine kidney, compared to growth in vitro; has murine homolog	YNL151C	RPC31	RNA polymerase III subunit C31
	CAGL0L04114g	4.00081212677549		Ortholog(s) have RNA binding activity, role in box H/ACA snoRNP assembly and nucleoplasm localization	CR_04110W		Putative RNA-binding protein; role in assembly of box H/ACA snoRNPs and thus pre-rRNA processing; Spider biofilm induced	YNL124W	NAF1	RNA-binding protein required for the assembly of box H/ACA snoRNPs; thus required for pre-rRNA processing; forms a complex with Shq1p and interacts with H/ACA snoRNP components Nhp2p and Cbf5p; similar to Gar1p
	CAGL0E02585g	4.00282049288913		Ortholog(s) have 3'-5'-exoribonuclease activity	C1_05050C	RRP6	Putative nuclear exosome exonuclease component; Hap43p-induced gene; mutation confers hypersensitivity to 5-fluorocytosine (5-FC), 5-fluorouracil (5-FU), and tubercidin (7-deazaadenosine)	YOR001W	RRP6	Nuclear exosome exonuclease component; has 3'-5' exonuclease activity that is regulated by Lrp1p; involved in RNA processing, maturation, surveillance, degradation, tethering, and export; role in sn/snoRNAs precursor degradation; forms a stable heterodimer with Lrp1p; has similarity to E. coli RNase D and to human PM-Sc1 100 (EXOSC10); mutant displays reduced transcription elongation in the G-les…
	CAGL0H02431g	4.00843526597747		Ortholog(s) have role in tRNA methylation and cytosol, nucleus localization	C2_10820C		S. cerevisiae ortholog YMR259C interacts with Trm7 for 2'-O-methylation of C32 of substrate tRNAs; downregulated by fluphenazine treatment or in an azole-resistant strain that overexpresses CDR1 and CDR2	YMR259C	TRM732	Protein involved in 2'-O-methylation of C32 of substrate tRNAs; interacts with 2'-O-ribose methyltransferase Trm7p; green fluorescent protein (GFP)-fusion protein localizes to the cytoplasm; non-essential gene; yeast null mutant can be functionally complemented by human THADA, mutations in which have been implicated in epithelial thyroid adenomas, type 2 diabetes, and polycystic ovary syndrome (P…
	CAGL0L11660g	4.00999995279269		Ortholog(s) have RNA polymerase III activity, role in tRNA transcription from RNA polymerase III promoter and DNA-directed RNA polymerase III complex, cytoplasm localization	C4_07060W		Ortholog(s) have RNA polymerase III activity, role in tRNA transcription from RNA polymerase III promoter and DNA-directed RNA polymerase III complex, cytoplasm localization	YOR116C	RPO31	RNA polymerase III largest subunit C160; part of core enzyme; similar to bacterial beta-prime subunit and to RPA190 and RPO21
	CAGL0D05016g	4.01685995064556		Ortholog(s) have role in maturation of 5.8S rRNA from tricistronic rRNA transcript (SSU-rRNA, 5.8S rRNA, LSU-rRNA), maturation of LSU-rRNA from tricistronic rRNA transcript (SSU-rRNA, 5.8S rRNA, LSU-rRNA)	C2_09380W	RRP15	Putative nucleolar protein; constituent of pre-60S ribosomal particles; Hap43-induced; repressed by prostaglandins	YPR143W	RRP15	Nucleolar protein; constituent of pre-60S ribosomal particles; required for proper processing of the 27S pre-rRNA at the A3 and B1 sites to yield mature 5.8S and 25S rRNAs
	CAGL0F02849g	4.02067532727078		Ortholog(s) have role in rRNA processing and cytoplasm localization	C1_07950C		Putative pre-60S pre-ribosomal particle subunit; essential gene; S. cerevisiae ortholog RRP17 is essential; Hap43p-induced; rat catheter biofilm induced	YDR412W	RRP17	Component of the pre-60S pre-ribosomal particle; required for cell viability under standard (aerobic) conditions but not under anaerobic conditions; exonuclease required for 5' end processing of pre-60S ribosomal RNA
	CAGL0K05555g	4.03777049249847		Ortholog(s) have snoRNA binding activity	C3_00370C	BUD21	Small-subunit processome component; repressed by prostaglandins	YOR078W	BUD21	Component of small ribosomal subunit (SSU) processosome; this complex contains U3 snoRNA; required at post-transcriptional step for efficient retrotransposition; absence results in decreased Ty1 Gag:GFP protein levels; originally isolated as bud-site selection mutant that displays a random budding pattern
	CAGL0M12122g	4.05138722019169		Ortholog(s) have GTP binding activity and role in cytoplasmic translation, filamentous growth, positive regulation of cellular response to amino acid starvation	C1_08100W	DRG1	Member of the DRG family of GTP-binding proteins; involved in regulation of invasive filamentous growth	YAL036C	RBG1	Member of the DRG family of GTP-binding proteins; associates with translating ribosomes; interacts with Tma46p, Ygr250cp, Gir2p and Yap1p via two-hybrid
	CAGL0E03289g	4.06140967778669		Ortholog(s) have mRNA binding activity and role in ribosomal large subunit biogenesis, stress granule assembly, translational initiation	C2_08760C	TIF4631	Putative translation initiation factor eIF4G; overexpression causes hyperfilamentation; hyphal- and macrophage-induced; genes encoding some translation factors are downregulated upon phagocytosis by murine macrophage	YGR162W	TIF4631	Translation initiation factor eIF4G; subunit of the mRNA cap-binding protein complex (eIF4F) that also contains eIF4E (Cdc33p); interacts with Pab1p and with eIF4A (Tif1p); also has a role in biogenesis of the large ribosomal subunit; TIF4631 has a paralog, TIF4632, that arose from the whole genome duplication
	CAGL0A04257g	4.12461418247856		Ortholog(s) have sequence-specific DNA binding activity, role in regulation of transcription from RNA polymerase II promoter and Rpd3L-Expanded complex, cytoplasm localization				YBL054W	TOD6	PAC motif binding protein involved in rRNA and ribosome biogenesis; subunit of the RPD3L histone deacetylase complex; Myb-like HTH transcription factor; hypophosphorylated by rapamycin treatment in a Sch9p-dependent manner; activated in stochastic pulses of nuclear localization
	CAGL0B04169g	4.14484260239348		Ortholog(s) have mRNA binding, rRNA primary transcript binding activity	C3_02020W		Ortholog(s) have mRNA binding, rRNA primary transcript binding activity	YPR112C	MRD1	Essential conserved small ribosomal subunit (40s) synthesis factor; component of the 90S preribosome; required for production of 18S rRNA and small ribosomal subunit; contains five consensus RNA-binding domains and binds to the pre-rRNA at two sites within the 18S region
[truncated: 2,326 more rows]
