# Supplementary material for: From the first touch to biofilm establishment by the human pathogen Candida glabrata: a genome-wide to nanoscale view
Source: Commun Biol. 2021 Jul 20;4:886. doi: 10.1038/s42003-021-02412-7 (PMC8292413; doi:10.1038/s42003-021-02412-7)
Supplement: Supplementary file 5 — Supplementary Data 3 [file 42003_2021_2412_MOESM5_ESM.xlsx]

## Sheet: Wt_B-vs-efg1_B_results
	Candida glabrata				Candida albicans			Saccharomyces cerevisiae
Group	ID	log2FoldChange	Name	Definition	orth ID	orth name	orth Definition	orth ID	orth Name	orth Definition
Lipid metabolism	CAGL0L02167g	-3.21612665596389		Ortholog(s) have 3-hydroxyacyl-CoA dehydrogenase activity, 3-hydroxybutyryl-CoA epimerase activity, enoyl-CoA hydratase activity	C3_00810C	FOX2	3-hydroxyacyl-CoA epimerase; fatty acid beta-oxidation; induced by phagocytosis; regulated by Mig1, by white-opaque switch, by DNA methylation; transcriptional activation by oleate requires Ctf1; rat catheter and Spider biofilm induced	YKR009C	FOX2	bifunctional hydroxyacyl-CoA dehydrogenase/enoyl-CoA hydratase FOX2|POX2	Dual specificity mitochondrial citrate and methylcitrate synthase; catalyzes the condensation of acetyl-CoA and oxaloacetate to form citrate and that of propionyl-CoA and oxaloacetate to form 2-methylcitrate
	CAGL0D00352g	-2.89086079625275		Ortholog(s) have ATPase activity, coupled to transmembrane movement of substances activity, role in fatty acid transmembrane transport and integral component of peroxisomal membrane localization	C1_12100C	PXA2	Putative peroxisomal, half-size adrenoleukodystrophy protein (ALD or ALDp) subfamily ABC transporter; Gcn4p-regulated	YKL188C	PXA2	ATP-binding cassette long-chain fatty acid transporter PXA2|PAT1
	CAGL0L09086g	-2.82116920028697		Ortholog(s) have 2-methylcitrate synthase activity, citrate (Si)-synthase activity, role in propionate catabolic process, 2-methylcitrate cycle, tricarboxylic acid cycle and mitochondrion localization				YPR001W	CIT3	citrate (Si)-synthase CIT3	Medium chain fatty acyl-CoA synthetase; activates imported fatty acids; accepts a wide range of fatty acid chain lengths with a preference for medium chains, C9:0-C13:0; localized to the peroxisome; comparative analysis suggests that a mitochondrially targeted form may result from translation starting at a non-canonical codon upstream of the annotated start codon
	CAGL0A03740g	-2.73445141860014		Ortholog(s) have role in fatty acid beta-oxidation, long-chain fatty acid catabolic process and peroxisome localization							Mitochondrial succinate-fumarate transporter; transports succinate into and fumarate out of the mitochondrion; required for ethanol and acetate utilization
	CAGL0H09460g	-2.65494749113022		Ortholog(s) have long-chain fatty acid-CoA ligase activity, medium-chain fatty acid-CoA ligase activity, very long-chain fatty acid-CoA ligase activity and role in long-chain fatty acid metabolic process	C3_02810C	FAA21	Predicted acyl CoA synthetase; upregulated upon phagocytosis; transcript regulated by Nrg1 and Mig1	YER015W	FAA2	medium-chain fatty acid-CoA ligase FAA2|FAM1	Subunit of heterodimeric peroxisomal ABC transport complex, with Pxa2p; required for import of long-chain fatty acids into peroxisomes; similar to human adrenoleukodystrophy transporters ABCD1and ABCD2, and ALD-related proteins; mutations in ABCD1 cause X-linked adrenoleukodystrophy (X-ALD), a peroxisomal disorder; human ABCD1 and ABCD2 can each partially complement yeast pxa1 pxa2 double null mu…
	CAGL0M09020g	-2.61189588291451		Ortholog(s) have succinate:fumarate antiporter activity, role in acetate catabolic process, carbon utilization, fatty acid catabolic process, fumarate transport, succinate transport and mitochondrion, plasma membrane localization	C5_04440C	SFC1	Putative succinate-fumarate transporter; involved in repression of growth on sorbose; alkaline induced; rat catheter biofilm induced; Spider biofilm induced	YJR095W	SFC1	ACR1	Acyl-CoA:sterol acyltransferase; endoplasmic reticulum enzyme that contributes the major sterol esterification activity in the presence of oxygen; ARE2 has a paralog, ARE1, that arose from the whole genome duplication
	CAGL0M02387g	-2.39519530227764		Ortholog(s) have ATPase activity, coupled to transmembrane movement of substances activity, role in fatty acid transport and integral component of peroxisomal membrane, peroxisomal importomer complex localization	CR_00330C	PXA1	Putative peroxisomal, half-size adrenoleukodystrophy protein (ALD or ALDp) subfamily ABC family transporter	YPL147W	PXA1	ATP-binding cassette long-chain fatty acid transporter PXA1|SSH2|PAT2|PAL1|LPI1	3-ketoacyl-CoA thiolase with broad chain length specificity; cleaves 3-ketoacyl-CoA into acyl-CoA and acetyl-CoA during beta-oxidation of fatty acids
	CAGL0H06787g	-2.18691039502044		Ortholog(s) have acetyl-CoA C-acyltransferase activity, mRNA binding activity, role in fatty acid beta-oxidation and glyoxysome, mitochondrial intermembrane space, peroxisomal matrix localization	CR_00150C	POT1	Putative peroxisomal 3-oxoacyl CoA thiolase; transcript regulated by Nrg1 and Mig1; farnesol regulated; Hap43-repressed	YIL160C	POT1	acetyl-CoA C-acyltransferase|POX3|FOX3	Steryl ester hydrolase; one of three gene products (Yeh1p, Yeh2p, Tgl1p) responsible for steryl ester hydrolase activity and involved in sterol homeostasis; localized to lipid particle membranes; YEH1 has a paralog, YEH2, that arose from the whole genome duplication
	CAGL0H01375g	-2.05344253804638	SUR2	Predicted sphinganine hydroxylase with role in sphingolipid biosynthesis; mutants show reduced sensitivity to caspofungin and increased sensitivity to micafungin	C2_02860W	SUR2	Putative ceramide hydroxylase; predicted enzyme of sphingolipid biosynthesis; regulated by Tsa1, Tsa1B under H2O2 stress conditions; Spider and flow model biofilm induced	YDR297W	SUR2	sphingosine hydroxylase|SYR2	Malate synthase, enzyme of the glyoxylate cycle; involved in utilization of non-fermentable carbon sources; expression is subject to carbon catabolite repression; localizes in peroxisomes during growth on oleic acid, otherwise cytosolic; can accept butyryl-CoA as acyl-CoA donor in addition to traditional substrate acetyl-CoA
	CAGL0D05566g	-1.98965733041696		Ortholog(s) have sterol esterase activity, role in sterol metabolic process and integral component of membrane, lipid particle localization	C2_07440C		Ortholog(s) have sterol esterase activity, role in sterol metabolic process and integral component of membrane, lipid particle localization	YLL012W	YEH1	sterol esterase	Protein involved in metabolism of phytosphingosine; not an essential gene
	CAGL0L03982g	-1.78244100151038		Ortholog(s) have malate synthase activity, role in acetate catabolic process, carbon utilization, fatty acid catabolic process, glyoxylate cycle and cytosol, glyoxysome, peroxisomal matrix localization	C1_09690W	MLS1	Malate synthase; glyoxylate cycle enzyme; no mammalian homolog; regulated upon white-opaque switch; phagocytosis, strong oxidative stress induced; stationary phase enriched; flow model biofilm repressed; rat catheter, Spider biofilm induced	YNL117W	MLS1	malate synthase MLS1	DDHD domain-containing phospholipase A1; mitochondrial matrix enzyme with sn-1-specific activity, hydrolyzing cardiolipin, PE, PC, PG and PA; implicated in remodeling of mitochondrial phospholipids; antagonistically regulated by Aft1p and Aft2p; in humans, mutations in DDHD1 and DDHD2 genes cause specific types of hereditary spastic paraplegia, while DDL1-defective yeast share similar phenotypes …
	CAGL0A00341g	-1.68692235592612		Ortholog(s) have role in sphingoid catabolic process and endoplasmic reticulum localization	C2_01660C		Protein of unknown function; possible ER protein; Hap43p-repressed; Spider biofilm induced	YGL010W	MPO1		Cytochrome b5; involved in the sterol and lipid biosynthesis pathways; acts as an electron donor to support sterol C5-6 desaturation
	CAGL0D00946g	-1.68060070408868		Putative phosphatidylinositol transfer protein; gene is upregulated in azole-resistant strain
	CAGL0E04510g	-1.60455889205753		Ortholog(s) have phospholipase activity, role in cardiolipin metabolic process, phosphatidylethanolamine metabolic process and mitochondrial matrix localization	C2_03140C		Ortholog(s) have phospholipase activity, role in cardiolipin metabolic process, phosphatidylethanolamine metabolic process and mitochondrial matrix localization	YOR022C	YOR022C	putative carboxylic ester hydrolase	Ceramide synthase component; involved in synthesis of ceramide from C26(acyl)-coenzyme A and dihydrosphingosine or phytosphingosine, functionally equivalent to Lag1p; LAC1 has a paralog, LAG1, that arose from the whole genome duplication
	CAGL0M10219g	-1.52739764110209		Putative ceramide synthase component; gene is upregulated in azole-resistant strain				YKL008C	LAC1	sphingosine N-acyltransferase LAC1|DGT1	Sphingolipid alpha-hydroxylase; functions in the alpha-hydroxylation of sphingolipid-associated very long chain fatty acids, has both cytochrome b5-like and hydroxylase/desaturase domains, not essential for growth
	CAGL0H01177g	-1.46172830769686		Ortholog(s) have diacylglycerol diphosphate phosphatase activity, phosphatidate phosphatase activity and role in farnesol biosynthetic process, phospholipid metabolic process	C7_02500C	DPP3	Protein similar to S. cerevisiae pyrophosphate phosphatase Dpp1; required for farnesol biosynthesis; repressed by 17-beta-estradiol, ethynyl estradiol; Spider biofilm induced	YDR284C	DPP1	bifunctional diacylglycerol diphosphate phosphatase/phosphatidate phosphatase|ZRG1	Peroxisomal malate dehydrogenase; catalyzes interconversion of malate and oxaloacetate; involved in the glyoxylate cycle
	CAGL0F03399g	-1.45809187607979	SCS7	Ortholog(s) have fatty acid alpha-hydroxylase activity, role in mannosyl-inositol phosphorylceramide metabolic process and endoplasmic reticulum, membrane localization	C4_04590W	SCS7	Putative ceramide hydroxylase; regulated by Nrg1; induced in high iron; fluconazole-induced; Hap43-repressed; Spider biofilm induced	YMR272C	SCS7	fatty acid alpha-hydroxylase|FAH1	Peroxisomal protein required for medium-chain fatty acid oxidation; also required for peroxisome proliferation, possibly by inducing membrane curvature; localization regulated by phosphorylation; transcription regulated by Adr1p and Pip2p-Oaf1p
	CAGL0L06798g	-1.45299675627198		Ortholog(s) have L-malate dehydrogenase activity, mRNA binding activity, role in NADH regeneration, fatty acid beta-oxidation and peroxisomal importomer complex, peroxisomal matrix localization	C2_10480W	MDH1-3	Predicted malate dehydrogenase; farnesol regulated; protein present in exponential and stationary growth phase yeast; Hap43p-repressed gene	YDL078C	MDH3	malate dehydrogenase MDH3	Cortical ER protein involved in ER-plasma membrane tethering; one of 6 proteins (Ist2p, Scs2p, Scs22p, Tcb1p, Tcb2p, Tcb3p) that connect ER to the plasma membrane (PM) and regulate PM phosphatidylinositol-4-phosphate (PI4P) levels by controlling access of Sac1p phosphatase to its substrate PI4P in the PM; localized to the bud via specific mRNA transport; non-tagged protein detected in a phosphory…
	CAGL0D02618g	-1.44859019657227	PEX11	Ortholog(s) have role in fatty acid oxidation, peroxisome fission and endoplasmic reticulum, mitochondrion, peroxisomal importomer complex, peroxisomal membrane localization	C6_04310W	PEX11	Putative peroxisomal membrane protein; role in fatty acid oxidation; expression is Tac1-regulated; Hms1p-dependent induction by geldamycin; Spider biofilm induced	YOL147C	PEX11	PMP27|PMP24	Phospholipase B (lysophospholipase) involved in lipid metabolism; required for efficient acyl chain remodeling of newly synthesized phosphatidylethanolamine-derived phosphatidylcholine; required for deacylation of phosphatidylcholine and phosphatidylethanolamine but not phosphatidylinositol; PLB1 has a paralog, PLB3, that arose from the whole genome duplication
	CAGL0L11440g	-1.42271659296823		Ortholog(s) have lipid binding activity and role in endoplasmic reticulum membrane organization, regulation of phosphatidylinositol dephosphorylation	C1_03100W		Putative lipid-binding protein with a predicted role in calcium-dependent phospholipid-binding	YML072C	TCB3		Glycerophosphocholine (GroPCho) phosphodiesterase; hydrolyzes GroPCho to choline and glycerolphosphate, for use as a phosphate source and as a precursor for phosphocholine synthesis; may interact with ribosomes
	CAGL0J11770g	-1.4090565494576	PLB1	Putative phospholipase B; predicted GPI-anchor	CR_09690C	PLB3	GPI-anchored cell surface phospholipase B; possibly secreted; fungal-specific (no mammalian homolog); induced by Tbf1; fluconazole-induced; possible essential gene (UAU1 method); Spider and flow model biofilm induced	YMR008C	PLB1	lysophospholipase	Peroxisomal NADP-dependent isocitrate dehydrogenase; catalyzes oxidation of isocitrate to alpha-ketoglutarate with the formation of NADP(H+), required for growth on unsaturated fatty acids; IDP3 has a paralog, IDP2, that arose from the whole genome duplication
	CAGL0J07040g	-1.39022867088236		Ortholog(s) have glycerophosphocholine phosphodiesterase activity, role in cellular response to drug, glycerophospholipid catabolic process and cytosol, ribosome localization	C5_04510W	GDE1	Glycerophosphocholine phosphodiesterase; mutation confers hypersensitivity to 5-fluorouracil (5-FU); F-12/CO2 early biofilm induced	YPL110C	GDE1	glycerophosphocholine phosphodiesterase	Isocitrate lyase; catalyzes the formation of succinate and glyoxylate from isocitrate, a key reaction of the glyoxylate cycle; expression of ICL1 is induced by growth on ethanol and repressed by growth on glucose
	CAGL0H03663g	-1.37223163357425		Ortholog(s) have isocitrate dehydrogenase (NADP+) activity, role in fatty acid beta-oxidation and mitochondrion, peroxisomal importomer complex, peroxisome localization				YNL009W	IDP3	isocitrate dehydrogenase (NADP(+)) IDP3	Phosphatidylinositol 4,5-bisphosphate 5-phosphatase; role in secretion; localizes to the endoplasmic reticulum via the C-terminal tail; lacks the Sac1 domain and proline-rich region found in the other 3 INP proteins
	CAGL0J03058g	-1.37100117951106		Ortholog(s) have isocitrate lyase activity, role in acetate catabolic process, carbon utilization, fatty acid catabolic process, glyoxylate cycle, pathogenesis and cytosol, glyoxysome, peroxisomal matrix localization	C1_04500W	ICL1	Isocitrate lyase; glyoxylate cycle enzyme; required for virulence in mice; induced upon phagocytosis by macrophage; farnesol regulated; Pex5-dependent peroxisomal localization; stationary phase enriched; rat catheter, Spider biofilm induced	YER065C	ICL1	isocitrate lyase 1	Lipid-binding ER protein involved in ER-plasma membrane tethering; one of 6 proteins (Ist2p, Scs2p, Scs22p, Tcb1p, Tcb2p, Tcb3p) that connect ER to plasma membrane and regulate PI4P levels by controlling access of Sac1p phosphatase to its substrate PI4P in PM; contains 3 calcium and lipid binding domains; non-tagged protein also localizes to mitochondria; C-termini of Tcb1p, Tcb2p and Tcb3p inter…
	CAGL0C05269g	-1.33939310321516		Ortholog(s) have phosphatidylinositol-4,5-bisphosphate 5-phosphatase activity, role in phosphatidylinositol dephosphorylation and endoplasmic reticulum, fungal-type vacuole membrane localization	C5_01920C		Ortholog(s) have phosphatidylinositol-4,5-bisphosphate 5-phosphatase activity, role in phosphatidylinositol dephosphorylation and endoplasmic reticulum, fungal-type vacuole membrane localization	YOL065C	INP54	phosphoinositide 5-phosphatase INP54	3-ketosphinganine reductase; catalyzes the second step in phytosphingosine synthesis; essential for growth in the absence of exogenous dihydrosphingosine or phytosphingosine; localized to lipid droplets; member of short chain dehydrogenase/reductase protein family
	CAGL0J08591g	-1.3380781079243		Ortholog(s) have lipid binding activity, role in endoplasmic reticulum membrane organization, regulation of phosphatidylinositol dephosphorylation and cortical endoplasmic reticulum, mitochondrion, plasma membrane localization	C1_10680C		Predicted lipid-binding ER protein; involved in ER-plasma membrane tethering; Spider biofilm induced	YOR086C	TCB1	tricalbin	Dihydrosphingosine 1-phosphate phosphatase; membrane protein involved in sphingolipid metabolism; YSR3 has a paralog, LCB3, that arose from the whole genome duplication
	CAGL0J04004g	-1.32872171181766		Ortholog(s) have role in lipid homeostasis, mitochondrion organization and integral component of mitochondrial membrane, mitochondrial outer membrane localization	C7_01750W		Putative mitochondrial outer membrane protein; regulated by Sef1p-, Sfu1p-, and Hap43p	YOR228C	MCP1		Putative protein of unknown function; green fluorescent protein (GFP)-fusion protein localizes to the vacuole; expression directly regulated by the metabolic and meiotic transcriptional regulator Ume6p; YIR014W is a non-essential gene
	CAGL0I09328g	-1.30587889840804		Ortholog(s) have 3-dehydrosphinganine reductase activity, role in 3-keto-sphinganine metabolic process, sphingolipid biosynthetic process and endoplasmic reticulum, lipid particle, mitochondrial outer membrane localization	CR_07380C	KSR1	3-ketosphinganine reductase, catalyzes the second step in phytosphingosine synthesis	YBR265W	TSC10	3-dehydrosphinganine reductase
	CAGL0K08272g	-1.30097939850103		Ortholog(s) have sphingosine-1-phosphate phosphatase activity, role in phospholipid dephosphorylation, sphingolipid biosynthetic process and endoplasmic reticulum localization				YKR053C	YSR3	sphinganine kinase YSR3|LBP2	Minor sphingoid long-chain base kinase; possibly involved in synthesis of long-chain base phosphates, which function as signaling molecules; LCB5 has a paralog, LCB4, that arose from the whole genome duplication
	CAGL0E05280g	-1.27347302148541	GRE2(B)	Putative methylglyoxal reductase (NADPH-dependent)							Lipid-binding ER protein, enriched at nucleus-vacuolar junctions (NVJ); may be involved in sterol metabolism or signaling at the NVJ; contains a synaptotagmin-like-mitochondrial-lipid binding protein (SMP) domain; binds phosphatidylinositols and other lipids in a large-scale study; may interact with ribosomes, based on co-purification experiments
	CAGL0K05995g	-1.2632175612405		Putative sphingoid long-chain base kinase; gene is upregulated in azole-resistant strain				YLR260W	LCB5	sphinganine kinase LCB5	Putative lipase
	CAGL0K08030g	-1.25448656407835		Ortholog(s) have lipid binding activity and endoplasmic reticulum, nucleus-vacuole junction, plasma membrane, ribosome localization	C5_04050W		Plasma membrane-localized protein of unknown function; Hap43p-repressed gene	YPR091C	NVJ2		Peroxisomal 2,4-dienoyl-CoA reductase; auxiliary enzyme of fatty acid beta-oxidation; homodimeric enzyme required for growth and sporulation on petroselineate medium; expression induced during late sporulation and in the presence of oleate
	CAGL0C04939g	-1.25146361305829		Has domain(s) with predicted triglyceride lipase activity and role in lipid metabolic process	C4_01120C		Predicted triglyceride lipase; Spider biofilm induced	YJR107W	YJR107W	putative lipase	Protein involved in regulation of phospholipid metabolism; one of 6 proteins (Ist2p, Scs2p, Scs22p, Tcb1p, Tcb2p, Tcb3p) that connect the ER and plasma membrane (PM); regulates PM PI4P levels by controlling access of the Sac1p phosphatase to its substrate, PI4P; human VAP homolog; similar to D. melanogaster inturned protein; SWAT-GFP and mCherry fusion proteins localize to the cytosol; SCS22 has …
	CAGL0H08063g	-1.2005190507583		Ortholog(s) have 2,4-dienoyl-CoA reductase (NADPH) activity, role in ascospore formation, fatty acid catabolic process and cytosol, nucleus, peroxisomal matrix localization	C4_00830W	SPS20	Peroxisomal 2,4-dienoyl-CoA reductase; stationary phase enriched protein; Spider biofilm induced	YNL202W	SPS19	SPX19	Elongase I, medium-chain acyl elongase; catalyzes carboxy-terminal elongation of unsaturated C12-C16 fatty acyl-CoAs to C16-C18 fatty acids; ELO1 has a paralog, ELO2, that arose from the whole genome duplication
	CAGL0H04543g	-1.18634816066434		Ortholog(s) have role in endoplasmic reticulum membrane organization, phospholipid biosynthetic process, regulation of phosphatidylinositol dephosphorylation and cytosol localization				YBL091C-A	SCS22	phospholipid metabolism-regulating protein SCS22	Peroxisomal delta3,delta2-enoyl-CoA isomerase; hexameric protein that converts 3-hexenoyl-CoA to trans-2-hexenoyl-CoA, essential for the beta-oxidation of unsaturated fatty acids, oleate-induced; ECI1 has a paralog, DCI1, that arose from the whole genome duplication
	CAGL0K00583g	-1.12638409528468		Ortholog(s) have fatty acid elongase activity, role in fatty acid elongation, unsaturated fatty acid and endoplasmic reticulum localization				YJL196C	ELO1	fatty acid elongase ELO1	Essential nuclear envelope/ER integral membrane protein; interacts and functions with Apq12p and Brr6p in lipid homeostasis; mutants are defective in nuclear pore complex biogenesis, mRNA nuclear export and are sensitive to sterol biosynthesis inhibitors and membrane fluidizing agents; identified as a dosage suppressor of a temperature sensitive mutation in the major karyopherin, CRM1; homologous…
	CAGL0F05071g	-1.12424254152818		Ortholog(s) have dodecenoyl-CoA delta-isomerase activity, role in fatty acid beta-oxidation, filamentous growth and peroxisome localization	CR_08690C	ECI1	Protein similar to S. cerevisiae Eci1p, which is involved in fatty acid oxidation; transposon mutation affects filamentous growth; expression is regulated upon white-opaque switching	YLR284C	ECI1	dodecenoyl-CoA isomerase	Multifunctional lipase/hydrolase/phospholipase; triacylglycerol lipase, steryl ester hydrolase, and Ca2+-independent phospholipase A2; catalyzes acyl-CoA dependent acylation of LPA to PA; required with Tgl3p for timely bud formation; phosphorylated and activated by Cdc28p; TGL4 has a paralog, TGL5, that arose from the whole genome duplication
	CAGL0D03960g	-1.11345948397868		Ortholog(s) have role in lipid homeostasis, mRNA export from nucleus, nuclear envelope organization and endoplasmic reticulum, integral component of membrane, nuclear envelope localization	CR_03930C		Ortholog(s) have role in lipid homeostasis, mRNA export from nucleus, nuclear envelope organization and endoplasmic reticulum, integral component of membrane, nuclear envelope localization	YHR036W	BRL1		Peroxisomal signal receptor for peroxisomal matrix proteins; recognizes the N-terminal nonapeptide signal (PTS2); WD repeat protein; defects in human homolog cause lethal rhizomelic chondrodysplasia punctata (RCDP)
	CAGL0G02365g	-1.00649363506268		Ortholog(s) have calcium-independent phospholipase A2 activity, lysophosphatidic acid acyltransferase activity, sterol esterase activity, triglyceride lipase activity	C3_00400C		Putative patatin-like phospholipase; macrophage-regulated gene; fungal-specific (no human or murine homolog)	YKR089C	TGL4	STC1	Cytoplasmic protein of unknown function; potential Cdc28p substrate; contains a Phox homology (PX) domain and specifically binds phosphatidylinositol 3-phosphate (PtdIns-3-P); YKR078W has a paralog, VPS5, that arose from the whole genome duplication
	CAGL0B01529g	-1.00426934208768	PEX7	Ortholog(s) have peroxisome matrix targeting signal-2 binding activity, role in fatty acid metabolic process, protein import into peroxisome matrix, docking and cytosol, nucleus, peroxisome localization	C6_00880W	PEX7	Ortholog(s) have peroxisome matrix targeting signal-2 binding activity, role in fatty acid metabolic process, protein import into peroxisome matrix, docking and cytosol, nucleus, peroxisome localization	YDR142C	PEX7	PEB1|PAS7	Isopentenyl diphosphate:dimethylallyl diphosphate isomerase; catalyzes an essential activation step in the isoprenoid biosynthetic pathway; required for viability; isopentenyl diphosphate:dimethylallyl diphosphate isomerase is also known as IPP isomerase
	CAGL0G02145g	1.00864647858104		Ortholog(s) have phosphatidylinositol-3-phosphate binding activity and cytoplasm localization				YKR078W	YKR078W
	CAGL0J06952g	1.02741038844592		Ortholog(s) have isopentenyl-diphosphate delta-isomerase activity, role in farnesyl diphosphate biosynthetic process and cytosol, nucleus localization	C4_02280W	IDI1	Ortholog(s) have isopentenyl-diphosphate delta-isomerase activity, role in farnesyl diphosphate biosynthetic process and cytosol, nucleus localization	YPL117C	IDI1	isopentenyl-diphosphate delta-isomerase IDI1|LPH10|BOT2	1-acyl-sn-glycerol-3-phosphate acyltransferase; catalyzes the acylation of lysophosphatidic acid to form phosphatidic acid, a key intermediate in lipid metabolism; enzymatic activity detected in lipid particles and microsomes
	CAGL0I04070g	1.1052517577403		Ortholog(s) have 1-acylglycerol-3-phosphate O-acyltransferase activity, role in glycerophospholipid biosynthetic process and endoplasmic reticulum, lipid particle, plasma membrane localization	C3_02600C	SLC1	Putative fatty acyltransferase; protein repressed during the mating process	YDL052C	SLC1	1-acylglycerol-3-phosphate O-acyltransferase SLC1	Phosphatidylserine decarboxylase of the Golgi and vacuolar membranes; converts phosphatidylserine to phosphatidylethanolamine; controls vacuolar membrane phospholipid content by regulating phospholipids in compartments that will eventually give rise to the vacuole; loss of Psd2p causes a specific reduction in vacuolar membrane PE levels while total PE levels are not significantly affected
	CAGL0D04950g	1.20597515415876		Ortholog(s) have lysophosphatidic acid acyltransferase activity, role in cellular triglyceride homeostasis, lipid particle organization, protein targeting to vacuole and Golgi apparatus, endoplasmic reticulum, lipid particle localization	C1_04110W		Ortholog(s) have lysophosphatidic acid acyltransferase activity, role in cellular triglyceride homeostasis, lipid particle organization, protein targeting to vacuole and Golgi apparatus, endoplasmic reticulum, lipid particle localization	YPR139C	LOA1	lysophosphatidic acid acyltransferase LOA1|VPS66	Protein that contains a PX domain and binds phosphoinositides; the authentic, non-tagged protein is detected in highly purified mitochondria in high-throughput studies; PX stands for Phox homology
	CAGL0I08745g	1.21850857310885		Ortholog(s) have phosphatidylserine decarboxylase activity	C5_04680W	PSD2	Ortholog(s) have phosphatidylserine decarboxylase activity, role in phosphatidylcholine biosynthetic process and cell division site, cytosol, endosome localization	YGR170W	PSD2	phosphatidylserine decarboxylase 2	Trans-golgi network aminophospholipid translocase (flippase); type 4 P-type ATPase; involved in phospholipid translocation, contributing to the maintenance of membrane lipid asymmetry in post-Golgi secretory vesicles; role in protein trafficking between the Golgi and endosomal system; localizes to the trans-Golgi network; localizes to the shmoo tip where it has a redundant role in the cellular re…
	CAGL0K08118g	1.2583459046496		Ortholog(s) have phosphatidylinositol binding activity, role in cellular response to drug and cytosol, mitochondrion, nucleus localization	C6_03330C		Putative protein of unknown function; mutation confers hypersensitivity to amphotericin B; overlaps orf19.5621	YPR097W	YPR097W		Syntaxin-like t-SNARE; forms a complex with Tlg1p and Vti1p and mediates fusion of endosome-derived vesicles with the late Golgi; required along with VPS45 for an early step of the constitutive CVT pathway; interactions with Vps45 prevents Tlg2p degradation, and facilitates t-SNARE complex formation; homologous to mammalian SNARE protein syntaxin 16 (Sx16)
	CAGL0H04477g	1.30250717814936		Ortholog(s) have phospholipid-translocating ATPase activity and role in intracellular protein transport, phospholipid translocation, response to pheromone involved in conjugation with cellular fusion	C4_03110W		Ortholog(s) have phospholipid-translocating ATPase activity and role in intracellular protein transport, phospholipid translocation, response to pheromone involved in conjugation with cellular fusion	YMR162C	DNF3	aminophospholipid-translocating P4-type ATPase DNF3	Delta(9) fatty acid desaturase; required for monounsaturated fatty acid synthesis and for normal distribution of mitochondria
	CAGL0G08932g	1.36711508740887		Ortholog(s) have SNAP receptor activity	C2_02210C	TLG2	Putative syntaxin-like t-SNARE; macrophage/pseudohyphal-repressed	YOL018C	TLG2		Non-classical phosphatidylinositol transfer protein (PITP); exhibits PI- but not PC-transfer activity; localizes to the peripheral endoplasmic reticulum, cytosol and microsomes; similar to Sec14p; partially relocalizes to the plasma membrane upon DNA replication stress
	CAGL0I00418g	1.48800259896148		Ortholog(s) have electron carrier activity, stearoyl-CoA 9-desaturase activity	C1_08360C	OLE1	Fatty acid desaturase, essential protein involved in oleic acid synthesis; required for aerobic hyphal growth and chlamydospore formation; subject to hypoxic regulation; fluconazole-induced; caspofungin repressed; Hap43p-induced	YGL055W	OLE1	stearoyl-CoA 9-desaturase|MDM2	Inositol-3-phosphate synthase; involved in synthesis of inositol phosphates and inositol-containing phospholipids; transcription is coregulated with other phospholipid biosynthetic genes by Ino2p and Ino4p, which bind the UASINO DNA element
	CAGL0I05940g	1.74674574833812		Ortholog(s) have phosphatidylinositol transporter activity	C1_10270C	SFH5	Putative phosphatidylinositol transporter; rat catheter and Spider biofilm repressed	YJL145W	SFH5		Trans-golgi network aminophospholipid translocase (flippase); maintains membrane lipid asymmetry in post-Golgi secretory vesicles; contributes to clathrin-coated vesicle formation, endocytosis, protein trafficking between the Golgi and endosomal system and the cellular response to mating pheromone; autoinhibited by its C-terminal tail; localizes to the trans-Golgi network; mutations in human homo…
	CAGL0I06050g	1.7511691367278	INO1	Putative inositol 1-phosphate synthase; regulated by the transcriptional activators Ino2p and Ino4p; protein differentially expressed in azole resistant strain	CR_10100C	INO1	Inositol-1-phosphate synthase; antigenic in human; repressed by farnesol in biofilm or by caspofungin; upstream inositol/choline regulatory element; glycosylation predicted; rat catheter, flow model induced; Spider biofilm repressed	YJL153C	INO1	inositol-3-phosphate synthase INO1|APR1	Choline kinase; catalyzes the first step in phosphatidylcholine synthesis via the CDP-choline (Kennedy pathway); exhibits some ethanolamine kinase activity contributing to phosphatidylethanolamine synthesis via the CDP-ethanolamine pathway; CKI1 has a paralog, EKI1, that arose from the whole genome duplication
	CAGL0G06270g	1.830345562064		Ortholog(s) have phospholipid-translocating ATPase activity	C3_07230W		Aminophospholipid translocase (flippase); maintains membrane lipid asymmetry in post-Golgi secretory vesicles; contributes to clathrin-coated vesicle formation and endocytosis; flow model biofilm repressed	YAL026C	DRS2	aminophospholipid-translocating P4-type ATPase DRS2|SWA3|FUN38	Bifunctional triacylglycerol lipase and LPA acyltransferase; lipid particle-localized triacylglycerol (TAG) lipase involved in triacylglycerol mobilization; catalyzes acylation of lysophosphatidic acid (LPA); potential Cdc28p substrate; TGL5 has a paralog, TGL4, that arose from the whole genome duplication
	CAGL0M04367g	1.94163436078788		Ortholog(s) have choline kinase activity, ethanolamine kinase activity, role in phosphatidylcholine biosynthetic process, phosphatidylethanolamine biosynthetic process and cytosol, nucleus localization	C3_05300C		Ortholog(s) have choline kinase activity, ethanolamine kinase activity, role in phosphatidylcholine biosynthetic process, phosphatidylethanolamine biosynthetic process and cytosol, nucleus localization	YLR133W	CKI1	bifunctional choline kinase/ethanolamine kinase CKI1
	CAGL0K05621g	2.05217160456465		Ortholog(s) have lysophosphatidic acid acyltransferase activity, triglyceride lipase activity, role in triglyceride mobilization and lipid particle localization				YOR081C	TGL5	STC2
	CAGL0H08712g	2.37772171598553		Has domain(s) with predicted phosphatidylinositol binding activity and role in cell communication							Fatty acid elongase, involved in sphingolipid biosynthesis; acts on fatty acids of up to 24 carbons in length; mutations have regulatory effects on 1,3-beta-glucan synthase, vacuolar ATPase, and the secretory pathway; ELO2 has a paralog, ELO1, that arose from the whole genome duplication; lethality of the elo2 elo3 double null mutation is functionally complemented by human ELOVL1 and weakly compl…
	CAGL0E06138g	2.59829545130174		Ortholog(s) have fatty acid synthase activity, role in palmitic acid biosynthetic process, response to pH and fatty acid synthase complex, glyoxysome localization							Aminophospholipid translocase (flippase); type 4 P-type ATPase; involved in phospholipid translocation, contributing to endocytosis, protein transport, and cellular polarization; localizes primarily to the plasma membrane; localizes to the shmoo tip where it has a redundant role in the cellular response to mating pheromone; DNF2 has a paralog, DNF1, that arose from the whole genome duplication
	CAGL0L08184g	2.78766988757638	FEN1	Predicted fatty acid elongase with role in sphingolipid biosynthetic process; mutants show reduced sensitivity to caspofungin and increased sensitivity to micafungin	C1_12790C	FEN1	Putative fatty acid elongase; predicted role in sphingolipid biosynthesis; possibly an essential gene, disruptants not obtained by UAU1 method; Spider and flow model biofilm induced	YCR034W	ELO2	fatty acid elongase ELO2|FEN1|VBM2|GNS1	Beta subunit of fatty acid synthetase; complex catalyzes the synthesis of long-chain saturated fatty acids; contains acetyltransacylase, dehydratase, enoyl reductase, malonyl transacylase, and palmitoyl transacylase activities
	CAGL0G08085g	2.99314465446315		Ortholog(s) have phospholipid-translocating ATPase activity				YDR093W	DNF2	aminophospholipid-translocating P4-type ATPase DNF2	Mitochondrial acetyl-coenzyme A carboxylase; catalyzes production of malonyl-CoA in mitochondrial fatty acid biosynthesis; relocalizes from mitochondrion to cytoplasm upon DNA replication stress; genetic and comparative analysis suggests that translation begins at a non-canonical (Ile) start codon at -372 relative to the annotated start codon
	CAGL0D00528g	3.15041479129325		Ortholog(s) have 3-hydroxyacyl-[acyl-carrier-protein] dehydratase activity, [acyl-carrier-protein] S-acetyltransferase activity and [acyl-carrier-protein] S-malonyltransferase activity, more	C5_00190C	FAS1	Beta subunit of fatty-acid synthase; multifunctional enzyme; Hap43, fluconazole-induced; amphotericin B, caspofungin repressed; macrophage/pseudohyphal-induced; flow model and Spider biofilm repressed	YKL182W	FAS1	tetrafunctional fatty acid synthase subunit FAS1	Subunit of the HOPS and the CORVET complexes; part of the Class C Vps complex essential for membrane docking and fusion at Golgi-to-endosome and endosome-to-vacuole protein transport stages
	CAGL0L10780g	3.17859963804907		Ortholog(s) have acetyl-CoA carboxylase activity, role in fatty acid biosynthetic process and cytosol, fungal-type vacuole membrane, mitochondrion localization				YMR207C	HFA1	acetyl-CoA carboxylase HFA1
	CAGL0L12694g	3.63069345994014		Ortholog(s) have phosphatidylinositol binding activity	C1_04540C	VPS16	Protein similar to S. cerevisiae Vps16p, which is involved in protein-vacuolar targeting; likely to be essential for growth, based on insertional mutagenesis; downregulated in biofilm or in azole-resistant strain that overexpresses MDR1	YPL045W	VPS16	tethering complex subunit VPS16|CVT15|VPT16|VAM9|SVL6	Plasma membrane sterol transporter of the ATP-binding cassette family; required, along with Pdr11p, for uptake of exogenous sterols and their incorporation into the plasma membrane; activity is stimulated by phosphatidylserine; sterol uptake is required for anaerobic growth because sterol biosynthesis requires oxygen; AUS1 has a paralog, PDR11, that arose from the whole genome duplication
Ergosterol metabolism	CAGL0F01419g	-3.20043699485091	AUS1	ATP-binding cassette transporter involved in sterol uptake				YOR011W	AUS1	ATP-binding cassette sterol transporter AUS1	C-4 methyl sterol oxidase; catalyzes the first of three steps required to remove two C-4 methyl groups from an intermediate in ergosterol biosynthesis; mutants accumulate the sterol intermediate 4,4-dimethylzymosterol; human MSMO1 functionally complements the growth defect caused by repression of ERG25 expression
	CAGL0M10571g	-2.20226586217517		Ortholog(s) have ergosterol O-acyltransferase activity, role in ergosterol metabolic process and endoplasmic reticulum localization	C2_06940C	ARE2	Acyl CoA:sterol acyltransferase; uses cholesterol and oleoyl-CoA substrates; protoberberine derivative drug inhibits enzyme activity; ketoconazole-induced; Hap43-repressed; flow model biofilm induced; Spider biofilm induced	YNR019W	ARE2	sterol acyltransferase|SAT1	Sphinganine C4-hydroxylase; catalyses the conversion of sphinganine to phytosphingosine in sphingolipid biosyntheis
	CAGL0D05940g	-2.13436940851608	ERG1	Squalene epoxidase with a role in ergosterol synthesis; involved in growth under conditions of low oxygen tension	C1_08590C	ERG1	Squalene epoxidase, epoxidation of squalene to 2,3(S)-oxidosqualene; ergosterol biosynthesis; allylamine antifungal drug target; NADH reducing cofactor but S. cerevisiae Erg1 uses NADPH; flow model biofilm induced; Spider biofilm repressed	YGR175C	ERG1	squalene monooxygenase	C-5 sterol desaturase; glycoprotein that catalyzes the introduction of a C-5(6) double bond into episterol, a precursor in ergosterol biosynthesis; transcriptionally down-regulated when ergosterol is in excess; mutants are viable, but cannot grow on non-fermentable carbon sources; substrate of HRD ubiquitin ligase; mutation is functionally complemented by human SC5D
	CAGL0K04477g	-1.58518961315358		Ortholog(s) have C-4 methylsterol oxidase activity, role in ergosterol biosynthetic process and endoplasmic reticulum membrane, plasma membrane localization	CR_02370W	ERG25	Putative C-4 methyl sterol oxidase; C4-demethylation of ergosterol biosynthesis intermediates, based on similarity to S. cerevisiae Erg25; fluconazole-induced; induced in azole-resistant strain; rat catheter and Spider biofilm induced	YGR060W	ERG25	methylsterol monooxygenase	Transporter of the ATP-binding cassette (ABC) family; involved in bile acid transport; negative regulator of vacuole fusion; regulates release of lumenal Ca2+ stores; similar to mammalian bile transporters; YBT1 has a paralog, VMR1, that arose from the whole genome duplication
	CAGL0L03828g	-1.58390260493743		Ortholog(s) have electron carrier activity, role in ergosterol biosynthetic process and endoplasmic reticulum membrane localization	C7_00700W	CYB5	Cytochrome b(5); ortholog of S. cerevisiae Cyb5; induced in high iron; fluconazole-induced; shows colony morphology-related gene regulation by Ssn6; mutants are viable	YNL111C	CYB5		Diacylglycerol pyrophosphate (DGPP) phosphatase; zinc-regulated vacuolar membrane-associated lipid phosphatase, dephosphorylates DGPP to phosphatidate (PA) and Pi, then PA to diacylglycerol; involved in lipid signaling and cell metabolism
	CAGL0F01793g	-1.55932230489153	ERG3	Delta 5,6 sterol desaturase; C-5 sterol desaturase; predicted transmembrane domain and endolasmic reticulum (ER) binding motif; gene used for molecular typing of C. glabrata strain isolates	C1_04770C	ERG3	C-5 sterol desaturase; introduces C-5(6) double bond into episterol; some clinical isolates show increased azole resistance and defects in hyphal growth and virulence; Efg1p-repressed; fluconazole-induced	YLR056W	ERG3	C-5 sterol desaturase|PSO6|SYR1	Lanosterol 14-alpha-demethylase; catalyzes C-14 demethylation of lanosterol to form 4,4''-dimethyl cholesta-8,14,24-triene-3-beta-ol in ergosterol biosynthesis pathway; transcriptionally down-regulated when ergosterol is in excess; member of cytochrome P450 family; associated and coordinately regulated with the P450 reductase Ncp1p; human CYP51A1 functionally complements the lethality of the erg1…
	CAGL0C03289g	-1.38717446020508	YBT1	Putative ABC transporter involved in bile acid transport; gene is upregulated in azole-resistant strain				YLL048C	YBT1	bile acid-transporting ATPase YBT1|BAT1	Zn2Cys6 family transcription factor; positively regulates sterol uptake under anaerobic conditions with SUT1; represses filamentation-inducing genes during non-starvation conditions; positively regulates mating along with SUT1 by repressing the expression of genes (PRR2, NCE102 and RHO5) which function as mating inhibitors; multicopy suppressor of mutations that cause low activity of the cAMP/PKA…
	CAGL0E04334g	-1.35602921257664	ERG11	Putative cytochrome P-450 lanosterol 14-alpha-demethylase; target enzyme of azole antifungal drugs; increased protein abundance in azole resistant strain	C5_00660C	ERG11	Lanosterol 14-alpha-demethylase; cytochrome P450 family; role in ergosterol biosynthesis; target of azole antifungals; may contribute to drug resistance; azole or flow model biofilm induced; drug treated biofilm induced; hypoxia regulated	YHR007C	ERG11	sterol 14-demethylase|CYP51	Delta(24)-sterol C-methyltransferase; converts zymosterol to fecosterol in the ergosterol biosynthetic pathway by methylating position C-24; localized to lipid particles, the plasma membrane-associated endoplasmic reticulum, and the mitochondrial outer membrane
	CAGL0C03872g	-1.23401531411302	TIR3	Putative GPI-linked cell wall protein involved in sterol uptake				YIL011W	TIR3	YIB1	Probable multiple transmembrane protein; involved in diploid invasive and pseudohyphal growth upon nitrogen starvation; is glycosylated and phosphorylated; interacts with Rim21p and Rim9p in the plasma membrane to form a pH-sensing complex in the Rim101 pathway and is required to maintain Rim21p levels; required for accumulation of processed Rim101p
	CAGL0L09383g	-1.16433223729276	SUT2	Ortholog(s) have role in negative regulation of filamentous growth of a population of unicellular organisms in response to starvation by negative regulation of transcription from RNA polymerase II promoter, positive regulation of sterol import by positive regulation of transcription from RNA polymerase II promoter				YPR009W	SUT2		Protein implicated in the regulation of ergosterol biosynthesis; one of a seven member gene family with a common essential function and non-essential unique functions; similar to human oxysterol binding protein (OSBP); SWAT-GFP and mCherry fusion proteins localize to the bud neck and vacuolar membrane; HES1 has a paralog, KES1, that arose from the whole genome duplication
	CAGL0H04653g	-1.08587737856095	ERG6	C24 sterol methyltransferase; mutation confers resistance to amphotericin B and nystatin and increased sensitivity to azoles	C3_02150C	ERG6	Delta(24)-sterol C-methyltransferase, converts zymosterol to fecosterol, ergosterol biosynthesis; mutation confers nystatin resistance; Hap43, GlcNAc-, fluconazole-induced; upregulated in azole-resistant strain; Spider biofilm repressed	YML008C	ERG6	sterol 24-C-methyltransferase|VID1|SED6|LIS1|ISE1	Acetyl-CoA C-acetyltransferase (acetoacetyl-CoA thiolase); cytosolic enzyme that transfers an acetyl group from one acetyl-CoA molecule to another, forming acetoacetyl-CoA; involved in the first step in mevalonate biosynthesis; human ACAT1 functionally complements the growth defect caused by repression of ERG10 expression
	CAGL0J03916g	-1.06667646512695		Ortholog(s) have oxysterol binding, sterol transporter activity and role in endocytosis, exocytosis, maintenance of cell polarity, piecemeal microautophagy of nucleus, sterol transport				YOR237W	HES1	oxysterol-binding protein related protein HES1|OSH5
	CAGL0L12364g	2.31128401224798		Ortholog(s) have acetyl-CoA C-acetyltransferase activity, role in ergosterol biosynthetic process and cytosol, nucleus localization	C2_04310W	ERG10	Acetyl-CoA acetyltransferase; role in ergosterol biosynthesis; soluble in hyphae; changes in protein abundance associated with azole resistance; fluconazole or ketoconazole induced; macrophage-downregulated protein; GlcNAc-induced protein	YPL028W	ERG10	acetyl-CoA C-acetyltransferase|TSM0115|LPB3	Polyamine transporter of the major facilitator superfamily; member of the 12-spanner drug:H(+) antiporter DHA1 family; recognizes spermine, putrescine, and spermidine; localizes to the plasma membrane
Response to drug	CAGL0J00363g	-3.65765651190729		Putative protein of major facilitator superfamily; gene is downregulated in azole-resistant strain	C6_01870C		Predicted MFS membrane transporter, member of the drug:proton antiporter (12 spanner) (DHA1) family; induced by nitric oxide, oxidative stress, alpha pheromone; fungal-specific; Hap43-repressed; Spider biofilm induced	YHR048W	YHK8		Transcriptional repressor; binds promoter sequences of cyclin genes, CYS3, and SMF2; not expressed during log phase of growth, but induced by stress or starvation during mitosis, and late in meiosis; represses 15% of all yeast genes as cells transition to quiescence; important for maintaining G1 arrest and for longevity of quiescent cells; member of Swi4p/Mbp1p family; phosphorylated by Cdc28p; r…
	CAGL0L10912g	-3.09395609898708	TPO4	Ortholog(s) have spermidine transmembrane transporter activity, spermine transmembrane transporter activity, role in spermidine transport, spermine transport and fungal-type vacuole membrane, plasma membrane localization	CR_03920C	TPO4	Putative sperimidine transporter; fungal-specific (no human or murine homolog); Spider biofilm induced; promoter bound by Tec1 and Ndt80; Bcr1-repressed in RPMI a/a biofilms	YOR273C	TPO4		Plasma membrane transporter of the major facilitator superfamily; involved in resistance to azole drugs such as ketoconazole and fluconazole
	CAGL0H06017g	-3.02524377784456	FLR1	Multidrug transporter of the major facilitator superfamily involved in 5-flucytosine resistance; gene is downregulated in azole-resistant strain
	CAGL0B02079g	-2.48851344211171		Ortholog(s) have azole transporter activity, role in asperfuranone biosynthetic process, azole transport and plasma membrane localization				YGR224W	AZR1	azole transporter	Polyamine transporter of the major facilitator superfamily; member of the 12-spanner drug:H(+) antiporter DHA1 family; recognizes spermine, putrescine, and spermidine; catalyzes uptake of polyamines at alkaline pH and excretion at acidic pH; during oxidative stress exports spermine, spermidine from the cell, which controls timing of expression of stress-responsive genes; phosphorylation enhances …
	CAGL0E03674g	-1.81065385920447	TPO1_2	Putative drug:H+ antiporter, involved in efflux of clotrimazole; required for resistance to clotrimazole and other drugs
	CAGL0G03927g	-1.53658557258438	TPO1_1	Putative drug:H+ antiporter, involved in efflux of clotrimazole; required for resistance to clotrimazole and other drugs	C7_01520W	FLU1	Multidrug efflux pump of the plasma membrane; MDR family member of the MFS (major facilitator superfamily) of transporters; involved in histatin 5 efflux; fungal-specific (no human/murine homolog)	YLL028W	TPO1		Protein of unknown function; may be involved in resistance to carboplatin and cisplatin; null mutant displays increase in spontaneous Rad52p foci; contains a lipid-binding domain and binds cardiolipin in a large-scale study
	CAGL0M01760g	-1.52480876417545	CDR1	Multidrug transporter of ATP-binding cassette (ABC) superfamily, involved in resistance to azoles; expression regulated by Pdr1p; increased abundance in azole resistant strains; expression increased by loss of the mitochondrial genome							Integral membrane protein localized to mitochondria; required for sporulation and maintaining sphingolipid content; similar to SUR7; FMP45 has a paralog, YNL194C, that arose from the whole genome duplication
	CAGL0K03069g	-1.43252204367221		Ortholog(s) have role in response to drug and cytosol, nucleus localization	C1_02030C		Ortholog(s) have role in response to drug and cytosol, nucleus localization	YMR073C	IRC21
	CAGL0G05566g	-1.40809673321821		Ortholog(s) have role in ascospore formation, cellular response to drug, fungal-type cell wall organization	C7_02240W	FMP45	Predicted membrane protein induced during mating; mutation confers hypersensitivity to toxic ergosterol analog, to amphotericin B; alkaline repressed; repressed by alpha pheromone in SpiderM medium; rat catheter, Spider biofilm induced	YDL222C	FMP45		Member of the multi-drug and toxin extrusion (MATE) family; the MATE family is part of the multidrug/oligosaccharidyl-lipid/polysaccharide (MOP) exporter superfamily; overproduction confers ethionine resistance and accumulation of S-adenosylmethionine
	CAGL0I04862g	-1.25074033482929	SNQ2	Predicted plasma membrane ATP-binding cassette (ABC) transporter, putative transporter involved in multidrug resistance; involved in Pdr1p-mediated azole resistance							Protein required for antifungal drug ciclopirox olamine resistance; not related to the subtelomerically-encoded COS family; the authentic, non-tagged protein is detected in highly purified mitochondria in high-throughput studies
	CAGL0J00495g	-1.1640562135054		Ortholog(s) have role in S-adenosylmethionine biosynthetic process, xenobiotic transmembrane transporter activity	C7_03590C		Putative ember of the multi-drug and toxin extrusion (MATE) family of the multidrug/oligosaccharidyl-lipid/polysaccharide exporter superfamily; Spider biofilm induced	YHR032W	ERC1		Plasma membrane ATP binding cassette (ABC) transporter; multidrug transporter and general stress response factor implicated in cellular detoxification; regulated by Pdr1p, Pdr3p and Pdr8p; promoter contains a PDR responsive element; PDR15 has a paralog, PDR5, that arose from the whole genome duplication
	CAGL0M05445g	-1.13786020737964		Ortholog(s) have role in signal transduction and mitochondrion localization	C1_10140C		Protein of unknown function; S. cerevisiae ortholog Cos111 confers resistance to the antifungal drug ciclopirox olamine; constitutive expression independent of MTL or white-opaque status; Spider biofilm induced	YBR203W	COS111		Transcription factor; involved in regulating multidrug resistance and oxidative stress response; forms a heterodimer with Pdr1p; contains a Zn(II)2Cys6 zinc finger domain that interacts with a pleiotropic drug resistance element in vitro
	CAGL0F02717g	-1.02184451783443	PDH1	Multidrug transporter, predicted plasma membrane ATP-binding cassette (ABC) transporter; regulated by Pdr1p; involved in fluconazole resistance				YDR406W	PDR15	ATP-binding cassette multidrug transporter PDR15
	CAGL0I02552g	1.16341338822655	STB5	Predicted sequence-specific DNA binding transcription factor, negative regulator of azole resistance; acts as transcriptional repressor of ATP-binding Cassette (ABC) transporter genes	C1_01200W	STB5	Putative transcription factor with zinc cluster DNA-binding motif; has similarity to S. cerevisiae Stb5p; Hap43p-repressed gene	YHR178W	STB5		Presumed antiporter of the major facilitator superfamily; member of the 12-spanner drug:H(+) antiporter DHA1 family; expression of gene is up-regulated in cells exhibiting reduced susceptibility to azoles
Response to stress	CAGL0E05984g	-3.00833096741515		Ortholog of S. cerevisiae : GRE1 and Saccharomyces cerevisiae S288C : YPL223C				YPL223C	GRE1		Basic leucine zipper (bZIP) transcription factor (ATF/CREB1 homolog); regulates the unfolded protein response, via UPRE binding, and membrane biogenesis; ER stress-induced splicing pathway facilitates efficient Hac1p synthesis; two functional forms of Hac1p are produced; translation initiation is repressed under non-stress conditions; protein abundance increases in response to DNA replication str…
	CAGL0G02739g	-2.91430423288694		Ortholog(s) have RNA polymerase II transcription factor activity, sequence-specific DNA binding, sequence-specific DNA binding activity	C2_05860C		Putative Xbp1 transcriptional repressor; binds to cyclin gene promoters in S. cerevisiae; Hap43-repressed; possibly essential, disruptants not obtained by UAU1 method	YIL101C	XBP1		Transcriptional repressor; recruits the Cyc8p-Tup1p complex to promoters; mediates glucose repression and negatively regulates a variety of processes including filamentous growth and alkaline pH response; activated in stochastic pulses of nuclear localization in response to low glucose
	CAGL0K12540g	-2.6777007394703	HAC1	bZIP domain-containing transcription factor, activates transcription of genes involved in unfolded protein response; activation does not require cleavage of HAC1 mRNA by Ire1p	C1_06130C	HAC1	bZIP transcription factor; role in unfolded protein response and control of morphology; transcript undergoes atypical splicing at C terminus under ER stress; induced during mating and by caspofungin; mRNA binds She3; Spider biofilm induced	YFL031W	HAC1	transcription factor HAC1|IRE15|ERN4
	CAGL0K12078g	-2.6303909858866		Ortholog(s) have RNA polymerase II core promoter proximal region sequence-specific DNA binding, RNA polymerase II repressing transcription factor binding and transcriptional repressor activity, more				YDR043C	NRG1	transcriptional regulator NRG1	Coproporphyrinogen III oxidase; oxygen-requiring enzyme that catalyzes sixth step in heme biosynthetic pathway; transcription is repressed by oxygen and heme (via Rox1p and Hap1p); human homolog CPOX can complement yeast mutant and allow growth of haploid null after sporulation of a heterozygous diploid
	CAGL0E01749g	-2.47647608556126	YPS4	Putative aspartic protease; member of a YPS gene cluster that is required for virulence in mice; induced in response to low pH and high temperature							Protein required for high temperature survival during stationary phase; not required for growth on nonfermentable carbon sources; the authentic, non-tagged protein is detected in highly purified mitochondria in high-throughput studies
	CAGL0K12100g	-2.1897806559549		Putative coproporphyrinogen III oxidase; protein differentially expressed in azole resistant strain	C3_04060C	HEM13	Coproporphyrinogen III oxidase; antigenic; on yeast cell surface, not hyphae; iron-regulated expression; Hap43, macrophage-repressed; farnesol-induced; possibly essential; flow model biofilm induced; rat catheter, Spider biofilm repressed	YDR044W	HEM13	coproporphyrinogen oxidase	Transcriptional repressor, activator; role in cellular adjustment to osmotic stress including modulation of mating efficiency; involved in repression of subset of hypoxic genes by Rox1p, repression of several DAN/TIR genes during aerobic growth, ergosterol biosynthetic genes in response to hyperosmotic stress; contributes to recruitment of Tup1p-Cyc8p general repressor to promoters; relocalizes t…
	CAGL0F07953g	-2.13775447673787		Ortholog of S. cerevisiae : SPG1 and Saccharomyces cerevisiae S288C : YGR236C				YGR236C	SPG1		Protein required for high temperature survival during stationary phase; not required for growth on nonfermentable carbon sources; the authentic, non-tagged protein is detected in highly purified mitochondria in high-throughput studies
	CAGL0K03003g	-2.12156744210417		Ortholog(s) have RNA polymerase II activating transcription factor binding and RNA polymerase II core promoter proximal region sequence-specific DNA binding, more	C4_01190W	CAS5	Transcription factor; cell wall damage response; required for adherence, response/resistance to caspofungin; repressed in core stress response; mutants have reduced CFU in mice, hyphal defect in C. elegans infection; Spider biofilm induced	YMR070W	MOT3	[MOT3]|[MOT3+]|ROX7	Heat shock protein that is highly induced upon stress; plays a role in SRP-dependent cotranslational protein-membrane targeting and translocation; member of the HSP70 family; cytoplasmic protein that concentrates in nuclei upon starvation; SSA4 has a paralog, SSA3, that arose from the whole genome duplication
	CAGL0K12958g	-2.11069956279694		Putative stress-induced alcohol dehydrogenase; gene is upregulated in azole-resistant strain							Transcriptional repressor that regulates hypoxic genes during normoxia; involved in the aerobic repression of genes such as COX5b, TIR1, and HEM13; binds DNA intrastrand cross-links formed by cisplatin; HMG (high mobility group box) domain containing protein which binds and bends cisplatin-modified DNA, blocking excision repair; IXR1 has a paralog, ABF2, that arose from the whole genome duplicati…
	CAGL0G03289g	-2.00182504693635	SSA3	Heat shock protein of the HSP70 family	C1_13480W	HSP70	Putative hsp70 chaperone; role in entry into host cells; heat-shock, amphotericin B, cadmium, ketoconazole-induced; surface localized in yeast and hyphae; antigenic in host; farnesol-downregulated in biofilm; Spider biofilm induced	YER103W	SSA4	Hsp70 family chaperone SSA4|YG107	Phospholipid hydroperoxide glutathione peroxidase; protects cells from phospholipid hydroperoxides and nonphospholipid peroxides during oxidative stress; induced by glucose starvation; protein abundance increases in response to DNA replication stress
	CAGL0L02013g	-1.98387741875977		Ortholog(s) have damaged DNA binding, sequence-specific DNA binding activity, role in DNA repair, cellular response to hypoxia, negative regulation of transcription from RNA polymerase II promoter and nuclear chromatin localization				YKL032C	IXR1	DNA-binding transcription repressor IXR1|ORD1	Stress inducible cytoplasmic thioredoxin peroxidase; cooperates with Tsa1p in the removal of reactive oxygen, nitrogen and sulfur species using thioredoxin as hydrogen donor; deletion enhances the mutator phenotype of tsa1 mutants; protein abundance increases in response to DNA replication stress; TSA2 has a paralog, TSA1, that arose from the whole genome duplication
	CAGL0C01705g	-1.96970524667929	GPX2	Putative glutathione peroxidase				YBR244W	GPX2	glutathione peroxidase GPX2|AMI1	Sulfiredoxin; contributes to oxidative stress resistance by reducing cysteine-sulfinic acid groups in the peroxiredoxin Tsa1p, which is formed upon exposure to oxidants; conserved in higher eukaryotes; protein abundance increases in response to DNA replication stress
	CAGL0K06259g	-1.93143475295019	TSA1	Thiol-specific antioxidant protein; predicted thioredoxin peroxidase involved in oxidative stress response; protein abundance decreased in ace2 mutant cells				YDR453C	TSA2	thioredoxin peroxidase TSA2|cTPxII	Stress-responsive transcriptional activator; activated in stochastic pulses of nuclear localization in response to various stress conditions; binds DNA at stress response elements of responsive genes, inducing gene expression; involved in diauxic shift
	CAGL0L05258g	-1.90838489641919		Ortholog(s) have sulfiredoxin activity, role in cellular protein localization, cellular response to oxidative stress and cytosol, nucleus localization	C2_05060C		Putative sulfiredoxin; regulated by Tsa1, Tsa1B in minimal media at 37 degrees C; flow model biofilm induced; Spider biofilm induced	YKL086W	SRX1	sulfiredoxin	Succinate semialdehyde dehydrogenase; involved in the utilization of gamma-aminobutyrate (GABA) as a nitrogen source; part of the 4-aminobutyrate and glutamate degradation pathways; localized to the cytoplasm
	CAGL0M13189g	-1.89939377707073	MSN4	Putative transcription factor similar to S. cerevisiae Msn4p; involved in response to oxidative stress				YKL062W	MSN4	stress-responsive transcriptional activator MSN4	Putative RNA binding protein; localizes to stress granules induced by glucose deprivation; interacts with Rbg1p in a two-hybrid assay; protein abundance increases in response to DNA replication stress
	CAGL0C04191g	-1.88893546871523		Ortholog(s) have succinate-semialdehyde dehydrogenase [NAD(P)+] activity and role in cellular response to oxidative stress, gamma-aminobutyric acid catabolic process, glutamate decarboxylation to succinate	C3_03470W		Succinate semialdehyde dehydrogenase; for utilization of gamma-aminobutyrate (GABA) as a nitrogen source; part of 4-aminobutyrate and glutamate degradation pathways; rat catheter biofilm induced	YBR006W	UGA2	succinate-semialdehyde dehydrogenase (NAD(P)(+))|UGA5	Subunit of Slx5-Slx8 SUMO-targeted ubiquitin ligase (STUbL) complex; role in proteolysis of spindle positioning protein Kar9, DNA repair proteins Rad52p and Rad57p; stimulated by SUMO-modified substrates; contains a C-terminal RING domain; forms nuclear foci upon DNA replication stress; required for maintenance of genome integrity like human ortholog RNF
	CAGL0F08217g	-1.85885270199801		Ortholog(s) have mRNA binding activity and cytoplasmic stress granule localization				YGR250C	YGR250C
	CAGL0G03553g	-1.83153515032741		Ortholog(s) have ubiquitin-protein transferase activity and role in cellular response to DNA damage stimulus, protein sumoylation, protein ubiquitination, telomere maintenance	C3_00310C		Putative ubiquitin-protein ligase; role in protein sumoylation, protein ubiquitination; Spider biofilm induced	YER116C	SLX8	SUMO-targeted ubiquitin ligase complex subunit SLX8	Carbonic anhydrase; metalloenzyme that catalyzes CO2 hydration to bicarbonate, which is an important metabolic substrate, and protons; not expressed under conditions of high CO2, such as inside a growing colony, but transcription is induced in response to low CO2 levels, such as on the colony surface in ambient air; poorly transcribed under aerobic conditions and at an undetectable level under an…
	CAGL0K10868g	-1.82398787277282	CTA1	Putative catalase A; gene is downregulated in azole-resistant strain; regulated by oxidative stress and glucose starvation; protein abundance increased in ace2 mutant cells							NADPH oxidase localized to the perinuclear ER; produces superoxide from NADPH; overexpression causes MCA1 dependent apoptosis; likely involved in superoxide-mediated regulation of the actin cytoskeleton; member of a conserved superfamily of NADPH oxidases (NOX enzymes); has similarity to iron/copper reductases (FRE1-8), particularly Fre8p
	CAGL0G01540g	-1.78660598285518	NCE103	Beta carbonic anhydrase with a predicted role in non-classical protein export; upregulated in azole-resistant strain; enzyme activity increased by amines and amino acids; protein abundance decreased in ace2 cells	C3_01300C	NCE103	Carbonic anhydrase; converts of CO2 to bicarbonate; essential for virulence in host niches with limited CO2, normal white-opaque switch; Mnl1-induced in weak acid stress; Hap43-induced gene; F-12/CO2, rat catheter, Spider biofilm induced	YNL036W	NCE103	carbonate dehydratase NCE103|NCE3	Plasma membrane protein involved in maintaining membrane organization; involved in maintaining organization during stress conditions; induced by heat shock, oxidative stress, osmostress, stationary phase, glucose depletion, oleate and alcohol; protein abundance increased in response to DNA replication stress and dietary restriction; regulated by the HOG and Ras-Pka pathways; required for dietary …
	CAGL0K05863g	-1.77500572504694		Ortholog(s) have superoxide-generating NADPH oxidase activity, role in apoptotic process, regulation of actin cytoskeleton organization and perinuclear endoplasmic reticulum, ribosome localization	C2_03530W		Ortholog(s) have superoxide-generating NADPH oxidase activity, role in apoptotic process, regulation of actin cytoskeleton organization and perinuclear endoplasmic reticulum, ribosome localization	YGL160W	AIM14	putative metalloreductase|YNO1	Protein of unknown function; null mutant displays sensitivity to DNA damaging agents; may have a role in lipid metabolism, based on localization to lipid droplets; the authentic, non-tagged protein is detected in highly purified mitochondria in high-throughput studies; protein abundance increases in response to DNA replication stress
	CAGL0J04202g	-1.73828542620954	HSP12	Heat shock protein; gene is upregulated in azole-resistant strain; expression upregulated in biofilm vs planktonic cell culture	C5_02110W		Putative heat shock protein; decreased expression in hyphae; transcription is increased in populations of cells exposed to fluconazole over multiple generations; overexpression increases resistance to farnesol and azoles	YFL014W	HSP12	lipid-binding protein HSP12|HOR5|GLP1	Transcriptional activator; involved in regulation of invertase and glucoamylase expression, invasive growth and pseudohyphal differentiation, iron uptake, chromium accumulation, and response to osmotic stress; localizes to the nucleus; relative distribution to the nucleus increases upon DNA replication stress
	CAGL0M09713g	-1.73600473655763		Putative protein involved in DNA damage response; gene is upregulated in azole-resistant strain	C2_03750W	YIM1	Protein similar to protease of mitochondrial inner membrane; increased transcription is observed upon benomyl treatment; macrophage-downregulated gene	YMR152W	YIM1		DNA damage-responsive protein; expression is increased in response to heat-shock stress or treatments that produce DNA lesions; contains multiple repeats of the amino acid sequence NNNDSYGS; protein abundance increases in response to DNA replication stress
	CAGL0E02079g	-1.72921278506478		Ortholog(s) have sequence-specific DNA binding activity				YOL116W	MSN1	PHD2|MSS10|HRB382|FUP1	Protein required for high temperature survival during stationary phase; not required for growth on nonfermentable carbon sources
	CAGL0K03459g	-1.63730330374128		Ortholog of S. cerevisiae : SPG4 and Saccharomyces cerevisiae S288C : YMR107W				YMR107W	SPG4		AP-1-like basic leucine zipper (bZIP) transcriptional activator; involved in stress responses, iron metabolism, and pleiotropic drug resistance; controls a set of genes involved in stabilizing proteins; binds consensus sequence TTACTAA; CAD1 has a paralog, YAP1, that arose from the whole genome duplication
	CAGL0L06666g	-1.60551269320737	YHB1	Putative flavohemoglobin, involved in nitric oxide detoxification	CR_07790C	YHB1	Nitric oxide dioxygenase; acts in nitric oxide scavenging/detoxification; role in virulence in mouse; transcript activated by NO, macrophage interaction; Hap43, hypha repressed; mRNA binds She3	YGR234W	YHB1	flavohemoglobin|YHB4	Vacuolar aspartate and glutamate exporter; member of a family of seven genes (AVT1-7) related to vesicular GABA-glycine transporters; involved in compartmentalizing acidic amino acids in response to nitrogen starvation; AVT6 has a paralog, AVT5, that arose from the whole genome duplication
	CAGL0F03069g	-1.59718006040922	CAD1	bZIP domain-containing protein				YDR423C	CAD1	YAP2	S-glutathionyl-(chloro)hydroquinone reductase (GS-HQR); glutathione transferase involved in cell-surface biosynthesis and architecture; catalyzes glutathione (GSH)-dependent reduction of GS-trichloro-p-hydroquinone to trichloro-p-hydroquinone; expression upregulated upon exposure to genotoxic agents, such as methyl methanesulfonate, cisplatin and bleomycin; not an essential gene; similar to YGR15…
	CAGL0G02101g	-1.5157093923215	ECM4	Putative omega class glutathione transferase; gene is downregulated in azole-resistant strain	CR_02130W	ECM4	Cytoplasmic glutathione S-transferase; regulated by Nrg1, Tup1; induced in core stress response, in cyr1 or ras1 mutant (yeast or hyphal cells); Tn mutation affects filamentous growth; stationary phase enriched; Spider biofilm induced	YKR076W	ECM4	S-glutathionyl-(chloro)hydroquinone reductase|GTO2	Cys2His2 zinc-finger transcriptional repressor; involved in alkaline responsive gene repression as part of adaptation to alkaline conditions; involved in cell wall assembly; required for alkaline pH-stimulated haploid invasive growth and sporulation; activated by alkaline-dependent proteolytic processing which results in removal of the C-terminal tail; similar to A. nidulans PacC
	CAGL0L02431g	-1.44857794237739		Has domain(s) with predicted role in cell redox homeostasis							Protein of unknown function; has sequence and structural similarity to flavodoxins; predicted to be palmitoylated; the authentic, non-tagged protein is detected in highly purified mitochondria in high-throughput studies
	CAGL0H03971g	-1.41147718877888		Ortholog(s) have role in cellular response to oxidative stress, pathogenesis and membrane raft, mitochondrion, plasma membrane localization	CR_05380C	YCP4	Flavodoxin-like protein involved in oxidative stress protection and virulence; flow model, rat catheter and Spider biofilm repressed	YCR004C	YCP4	flavodoxin-like fold family protein	Cis-golgi localized monothiol glutaredoxin; more similar in activity to dithiol than other monothiol glutaredoxins; involved in the oxidative stress response; does not bind metal ions; GRX7 has a paralog, GRX6, that arose from the whole genome duplication
	CAGL0H06611g	-1.39172581378983		Ortholog of S. cerevisiae : ESL1, C. albicans SC5314 : C4_01020C_A, C. dubliniensis CD36 : Cd36_41030, C. parapsilosis CDC317 : CPAR2_401340 and Candida tenuis NRRL Y-1498 : CANTEDRAFT_104645	C4_01020C		Ortholog of S. cerevisiae : ESL1, C. glabrata CBS138 : CAGL0H06611g, C. dubliniensis CD36 : Cd36_41030, C. parapsilosis CDC317 : CPAR2_401340 and Candida tenuis NRRL Y-1498 : CANTEDRAFT_104645	YIL151C	ESL1		Transmembrane histidine phosphotransfer kinase and osmosensor; regulates MAP kinase cascade; transmembrane protein with an intracellular kinase domain that signals to Ypd1p and Ssk1p, thereby forming a phosphorelay system similar to bacterial two-component regulators
	CAGL0I04554g	-1.3547397832079	GRX7	Putative monothiol glutaredoxin	C5_01560C		Putative glutaredoxin; induced by nitric oxide; Spider biofilm induced	YBR014C	GRX7	glutathione-disulfide reductase GRX7	Glycerol dehydrogenase; involved in an alternative pathway for glycerol catabolism used under microaerobic conditions; also has mRNA binding activity; member of the aldo-keto reductase (AKR) family; human homolog AKR1B1 can complement yeast null mutant; protein abundance increases in response to DNA replication stress; GCY1 has a paralog, YPR1, that arose from the whole genome duplication
	CAGL0H06567g	-1.31102153836448		Ortholog(s) have histidine phosphotransfer kinase activity, osmosensor activity, phosphorelay response regulator activity, protein histidine kinase activity	CR_01000C	SLN1	Histidine kinase involved in a two-component signaling pathway that regulates cell wall biosynthesis; mutants are sensitive to growth on H2O2 medium; rat catheter and Spider biofilm induced	YIL147C	SLN1	YPD2	Plasma membrane sulfite pump involved in sulfite metabolism; required for efficient sulfite efflux; major facilitator superfamily protein
	CAGL0I01100g	-1.26835937166525	GCY1	Ortholog(s) have alditol:NADP+ 1-oxidoreductase activity, glycerol dehydrogenase [NAD(P)+] activity, mRNA binding activity	C3_07340W	GCY1	Aldo/keto reductase; mutation confers hypersensitivity to toxic ergosterol analog; farnesol-repressed; stationary phase enriched protein; flow model biofilm induced; Spider biofilm repressed	YOR120W	GCY1	glycerol 2-dehydrogenase (NADP(+)) GCY1|GCY	Gamma glutamylcysteine synthetase; catalyzes the first step in glutathione (GSH) biosynthesis; expression induced by oxidants, cadmium, and mercury; protein abundance increases in response to DNA replication stress
	CAGL0L03630g	-1.24088233235191	GSH1	Putative gamma glutamylcysteine synthetase, essential for viability; role in glutathione biosynthesis; required to keep the redox homeostasis and to detoxify the cell of metal ions	C1_07880C	GCS1	Gamma-glutamylcysteine synthetase; glutathione synthesis, required for virulence;induced in low iron, H2O2, Cd, or presence of human neutrophils; possibly adherence-induced; Spider and F-12/CO2 biofilm induced	YJL101C	GSH1	glutamate--cysteine ligase	Glutathione-dependent oxidoreductase; hydroperoxide and superoxide-radical responsive; monothiol glutaredoxin subfamily member along with Grx4p and Grx5p; protects cells from oxidative damage; with Grx4p, binds to Aft1p in iron-replete conditions, promoting its dissociation from promoters; evidence exists indicating that the translation start site is not Met1 as currently annotated, but rather Me…
	CAGL0G08151g	-1.22243424600654		Ortholog(s) have 2 iron, 2 sulfur cluster binding, RNA polymerase II activating transcription factor binding, glutathione disulfide oxidoreductase activity	C4_02710C	GRX3	Putative glutaredoxin; flucytosine induced; regulated by Gcn4p; repressed in response to amino acid starvation (3-aminotriazole treatment)	YDR098C	GRX3	monothiol glutaredoxin GRX3	Dihydroxyacetone kinase; required for detoxification of dihydroxyacetone (DHA); involved in stress adaptation
	CAGL0H08129g	-1.2196147097308		Ortholog(s) have role in cellular response to pH, filamentous growth of a population of unicellular organisms in response to pH, pathogenesis, protein processing, pseudohyphal growth, regulation of intracellular pH	C2_03400C	DFG16	Rim101 pathway protein that acts in Rim101 processing; regulates filamentation in response to alkaline pH; required for host tissue invasion during infection; flow model biofilm induced	YOR030W	DFG16	ZRG12|ECM41	Protein kinase; implicated in activation of the plasma membrane H(+)-ATPase Pma1p in response to glucose metabolism; plays a role in ion homeostasis; protein abundance increases in response to DNA replication stress
	CAGL0L11374g	-1.21920861517192		Ortholog(s) have glycerone kinase activity, role in cellular response to toxic substance, glycerol catabolic process and cytosol localization				YML070W	DAK1	dihydroxyacetone kinase	Low-affinity cyclic AMP phosphodiesterase; controls glucose and intracellular acidification-induced cAMP signaling, target of the cAMP-protein kinase A (PKA) pathway; glucose induces transcription and inhibits translation
	CAGL0C02893g	-1.20844169570296		Ortholog(s) have protein serine/threonine kinase activity	C3_00550C	HRK1	Putative serine/threonine kinase; predicted role in cellular ion homeostasis; Spider biofilm repressed	YOR267C	HRK1	putative serine/threonine protein kinase HRK1	Scaffold protein in the HKR1 sub-branch of the Hog1p-signaling pathway; physically interacts with the cytoplasmic domain of Hkr1p, and with Sho1p, Pbs2p, and Ste11p; prevents cross-talk signaling from Hkr1p of the osmotic stress MAPK cascade to the Kss1p MAPK cascade; non-essential gene
	CAGL0H07667g	-1.20632494491727		Ortholog(s) have 3',5'-cyclic-AMP phosphodiesterase activity, 3',5'-cyclic-GMP phosphodiesterase activity	C5_02290W	PDE1	Low affinity cyclic nucleotide phosphodiesterase; mediates cAMP signaling in response to glucose or intracellular acidification; macrophage-repressed; Spider biofilm induced	YGL248W	PDE1	3',5'-cyclic-nucleotide phosphodiesterase PDE1	ER localized heme oxygenase; involved in heme degradation during iron starvation and in the oxidative stress response; expression is regulated by AFT1 and oxidative stress; relocates to the perinuclear region in the presence of oxidants
	CAGL0D00660g	-1.17803487282298		Ortholog(s) have MAP-kinase scaffold activity and role in negative regulation of MAP kinase activity, osmosensory signaling pathway via Sho1 osmosensor	C3_05320W		Protein of unknown function; Hog1-repressed; Spider biofilm induced	YDL073W	YDL073W		Regulatory subunit for Glc7p type-1 protein phosphatase (PP1); tethers Glc7p to Gsy2p glycogen synthase, binds Hsf1p heat shock transcription factor, required for induction of some HSF-regulated genes under heat shock; GAC1 has a paralog, PIG1, that arose from the whole genome duplication
	CAGL0A03905g	-1.10442998778071	HMX1	Ortholog(s) have heme oxygenase (decyclizing) activity and role in cellular iron ion homeostasis, heme catabolic process, response to carbon monoxide, response to oxidative stress	C1_00350C	HMX1	Heme oxygenase; utilization of hemin iron; transcript induced by heat, low iron, or hemin; repressed by Efg1; induced by low iron; upregulated by Rim101 at pH 8; Hap43-induced; Spider and flow model biofilm induced	YLR205C	HMX1		Mitochondrial inner membrane half-type ABC transporter; required for respiratory growth at high temperature; localizes to vacuole membrane in response to H2O2; similar to human TAP1 and TAP2 implicated in bare lymphocyte syndrome and Wegener-like granulomatosis
	CAGL0H04037g	-1.08426529922204		Ortholog(s) have heat shock protein binding, protein phosphatase regulator activity and role in glycogen metabolic process, meiotic nuclear division, mitotic spindle assembly checkpoint, response to heat	C7_00660W	GAC1	Putative regulatory subunit of ser/thr phosphoprotein phosphatase 1; fluconazole-induced; caspofungin repressed; transcript induced by Mnl1 under weak acid stress; regulated by Nrg1, Tup1; Spider and flow model biofilm induced	YOR178C	GAC1	protein phosphatase regulator GAC1	Putative 4a-hydroxytetrahydrobiopterin dehydratase; green fluorescent protein (GFP)-fusion protein localizes to mitochondria and is induced in response to the DNA-damaging agent MMS
	CAGL0F03003g	-1.06556509992773		Ortholog(s) have osmosensor activity and role in (1->3)-beta-D-glucan biosynthetic process, cellular bud site selection, fungal-type cell wall organization, hyperosmotic response, osmosensory signaling pathway via Sho1 osmosensor				YDR420W	HKR1		GPI inositol deacylase of the endoplasmic reticulum (ER); negatively regulates COPII vesicle formation; prevents production of vesicles with defective subunits; required for proper discrimination between resident ER proteins and Golgi-bound cargo molecules; functional ortholog of human PGAP1, mutation of which is associated with intellectual disability and encephalopathy
	CAGL0A01133g	1.02114057760864		Ortholog(s) have role in cellular response to hydrogen peroxide and mitochondrial inner membrane, vacuolar membrane localization				YPL270W	MDL2	ATP-binding cassette permease MDL2	Reticulon protein; involved in nuclear pore assembly and maintenance of tubular ER morphology; promotes membrane curvature; regulates the ER asymmetry-induced inheritance block during ER stress; role in ER-derived peroxisomal biogenesis; increases tubular ER when overexpressed; mutants have reduced phosphatidylserine transfer between the ER and mitochondria; interacts with exocyst subunit Sec6p, …
	CAGL0K03201g	1.04206112856775		Ortholog(s) have role in ascospore formation, cellular response to biotic stimulus and cellular response to starvation, more	C2_00480C	PHHB	Putative 4a-hydroxytetrahydrobiopterin dehydratase; transposon mutation affects filamentous growth; flow model biofilm induced; Spider biofilm induced	YHL018W	YHL018W	4a-hydroxytetrahydrobiopterin dehydratase	Putative cell wall mannoprotein; member of the Srp1p/Tip1p family of serine-alanine-rich proteins; transcription is induced by cold shock and anaerobiosis; TIR2 has a paralog, TIR3, that arose from the whole genome duplication
	CAGL0B02585g	1.08184763936825		Ortholog(s) have role in ER-dependent peroxisome organization, endoplasmic reticulum inheritance, endoplasmic reticulum tubular network maintenance, nuclear pore complex assembly, response to endoplasmic reticulum stress	C4_04800W		Ortholog(s) have role in ER-dependent peroxisome organization, endoplasmic reticulum inheritance, endoplasmic reticulum tubular network maintenance, nuclear pore complex assembly, response to endoplasmic reticulum stress	YDR233C	RTN1		Lunapark family member involved in ER network formation; regulates the ER asymmetry-induced inheritance block during ER stress; localizes to ER junctions and this localization is regulated by the yeast atlastin ortholog Sey1p; interacts with the reticulon protein Rtn1p; induced in response to the DNA-damaging agent MMS
	CAGL0F01463g	1.08580345635774	TIR1	Putative GPI-linked cell wall mannoprotein of the Srp1p/Tip1p family				YOR010C	TIR2	putative GPI-anchored mannoprotein|SRP2	Subunit of TORC1; TORC1 is a rapamycin-sensitive complex involved in growth control that contains Tor1p or Tor2p, Lst8p and Tco89p; contains four HEAT repeats and seven WD-40 repeats; may act as a scaffold protein to couple TOR and its effectors
	CAGL0M07139g	1.10983803809395		Ortholog(s) have role in endoplasmic reticulum tubular network organization, response to endoplasmic reticulum stress and endoplasmic reticulum tubular network localization				YHR192W	LNP1		Cytoplasmic thioredoxin reductase; key regulatory enzyme that determines the redox state of the thioredoxin system, which acts as a disulfide reductase system and protects cells against both oxidative and reductive stress; protein abundance increases in response to DNA replication stress; TRR1 has a paralog, TRR2, that arose from the whole genome duplication
	CAGL0M13409g	1.11210503181857		Ortholog(s) have ubiquitin binding activity and role in cellular response to starvation, positive regulation of conjugation with cellular fusion, regulation of cell growth	C1_05460W	KOG1	Putative TORC1 subunit; heterozygous null mutant displays sensitivity to rapamycin; likely to be essential for growth, based on an insertional mutagenesis strategy	YHR186C	KOG1	ubiquitin-binding TORC1 subunit KOG1|LAS24	Putative benzil reductase;(GFP)-fusion protein localizes to the cytoplasm and is induced by the DNA-damaging agent MMS; sequence similarity with short-chain dehydrogenase/reductases; null mutant has increased spontaneous Rad52p foci
	CAGL0A02530g	1.11686138406356		Thioredoxin reductase	C5_02710W	TRR1	Thioredoxin reductase; regulated by Tsa1/Tsa1B, Hap43; induced by nitric oxide, peroxide; oxidative stress-induce via Cap1; induced by human neutrophils; stationary phase enriched protein	YDR353W	TRR1	thioredoxin-disulfide reductase TRR1	Nuclear protein with a role in protein quality control; localizes to the intranuclear quality control compartment (INQ) in response to proteasome inhibition or DNA replication stress; INQ likely sequesters proteins involved in DNA metabolism for degradation or re-folding; DNA-binding protein with preference for UV-damaged DNA; contains three WD domains (WD-40 repeat); human ortholog WDR76 also ex…
	CAGL0F06919g	1.12971934072826		Ortholog(s) have oxidoreductase activity, acting on NAD(P)H, oxygen as acceptor activity and cytoplasm localization				YIR036C	IRC24	sepiapterin reductase family protein IRC24	Subunit of the THO complex; THO is required for efficient transcription elongation and involved in transcriptional elongation-associated recombination; required for LacZ RNA expression from certain plasmids
	CAGL0I03542g	1.1493026370391		Ortholog(s) have DNA binding activity, role in regulation of DNA damage checkpoint and cytoplasm, nuclear chromatin, nuclear periphery localization	C7_01270C		Ortholog(s) have DNA binding activity, role in regulation of DNA damage checkpoint and cytoplasm, nuclear chromatin, nuclear periphery localization	YDL156W	CMR1		Rho GDP dissociation inhibitor; involved in the localization and regulation of Cdc42p and Rho1p; protein abundance increases in response to DNA replication stress
	CAGL0J05654g	1.15508474778686		Ortholog(s) have DNA binding, mRNA binding activity	C2_04870C		Putative THO complex subunit; possibly an essential gene, disruptants not obtained by UAU1 method; protein newly produced during adaptation to the serum	YNL139C	THO2	RLR1|LDB5|ZRG13	Protein with a putative role in response to acid stress; null mutant is sensitive to acetic acid; transcription is regulated by Haa1p and induced in the presence of acetic acid; protein observed in plasma membrane foci in the presence of acetic acid; the authentic, non-tagged protein is detected in a phosphorylated state in highly purified mitochondria in high-throughput studies
	CAGL0J09152g	1.2155887987639		Ortholog(s) have Rho GDP-dissociation inhibitor activity	C3_05000W	RDI1	Putative rho GDP dissociation inhibitor; transposon mutation affects filamentous growth; farnesol, filament-induced; regulated by Nrg1, Tup1; protein levels low in stationary phase yeast	YDL135C	RDI1		Cytoplasmic chaperone of the Hsp90 family; plays a role in determining prion variants; redundant in function and nearly identical with Hsp82p, and together they are essential; expressed constitutively at 10-fold higher basal levels than HSP82 and induced 2-3 fold by heat shock; contains two acid-rich unstructured regions that promote the solubility of chaperone-substrate complexes; HSC82 has a pa…
	CAGL0H10076g	1.22558878614651		Ortholog(s) have cellular bud, endoplasmic reticulum, mitochondrion, plasma membrane localization				YBR054W	YRO2		Protein that binds eIF4G and has a role in repression of translation; has an RGG motif; found in cytoplasmic P bodies; binds to mRNAs under glucose starvation stress, most often in the 5' UTR; found associated with small nucleolar RNAs snR10 and snR11; SBP1 has a paralog, RNP1, that arose from the whole genome duplication
	CAGL0L00495g	1.22687122474638	HSC82	Putative heat shock protein	C7_02030W	HSP90	Essential chaperone, regulates several signal transduction pathways and temperature-induced morphogenesis; activated by heat shock, stress; localizes to surface of hyphae, not yeast cells; mediates echinocandin and biofilm azole resistance	YMR186W	HSC82	Hsp90 family chaperone HSC82|HSP90	Targeting subunit for Glc7p protein phosphatase; localized to the bud neck, required for localization of chitin synthase III to the bud neck via interaction with the chitin synthase III regulatory subunit Skt5p; phosphorylation by Slt2p and Kss1p involved in regulating Bni4p in septum assembly
	CAGL0E03960g	1.31643899421277		Ortholog(s) have eukaryotic initiation factor 4G binding, mRNA binding activity, role in negative regulation of translation in response to stress and P-body, cytoplasmic stress granule, nucleolus localization	C3_04090W	SBP1	Similar to RNA binding proteins; downregulated upon adherence to polystyrene; stationary-phase enriched protein	YHL034C	SBP1	SSB1|SSBR1
	CAGL0J07480g	1.32524790568812		Ortholog(s) have role in asymmetric protein localization, barrier septum assembly, cellular response to biotic stimulus, cellular response to starvation and chitin biosynthetic process, more	C1_03860C	BNI4	Protein required for wild-type cell wall chitin distribution, morphology, hyphal growth; not essential; similar to S. cerevisiae Bni4p (targeting subunit for Glc7p phosphatase, involved in bud-neck localization of chitin synthase III)	YNL233W	BNI4		Unique component of the U4/U6.U5 tri-snRNP particle; tri-snRNP is required for conformational changes which result in the catalytic activation of the spliceosome; dispensable for spliceosome assembly
	CAGL0B03707g	1.35879517516542		Ortholog(s) have DNA-directed DNA polymerase activity and role in DNA strand elongation involved in DNA replication, DNA synthesis involved in UV-damage excision repair, premeiotic DNA replication							ARF-like small GTPase of the RAS superfamily; required for recruitment of Arl1p, a GTPase that regulates membrane traffic, to the Golgi apparatus; NatC-catalyzed N-terminal acetylation regulates Golgi membrane association mediated by interaction with membrane receptor, Sys1p; similar to ADP-ribosylation factor and orthologous to mammalian ARFRP1
	CAGL0K01265g	1.38765459078876		Ortholog(s) have role in cellular response to biotic stimulus, cellular response to starvation and filamentous growth of a population of unicellular organisms in response to biotic stimulus, more	C1_11130W	FGR16	Protein lacking an ortholog in S. cerevisiae; transposon mutation affects filamentous growth; fluconazole-downregulated	YGR075C	PRP38	U4/U6-U5 snRNP complex subunit PRP38	Putative protein of unknown function; the authentic, non-tagged protein is detected in highly purified mitochondria in high-throughput studies
	CAGL0L12826g	1.39125859657244		Ortholog(s) have GTPase activity and role in Golgi to plasma membrane protein transport, protein targeting to Golgi, response to endoplasmic reticulum stress	C1_11190W	ARL3	Putative Ras superfamily GTPase; induced by nitric oxide independent of Yhb1p	YPL051W	ARL3	Arf family GTPase ARL3	Protein involved in transcription termination by RNA polymerase II; interacts with exonuclease Rat1p and Rai1p; has an RPR domain (carboxy-terminal domain interacting domain); also involved in regulation of Ty1 transposition
	CAGL0G01925g	1.47053585615695		Ortholog(s) have role in hyperosmotic response, response to antibiotic, response to salt stress and mitochondrion localization	C1_05160C		Putative phosphatidyl synthase; stationary phase enriched protein; transcript repressed by yeast-hypha switch; Hap43-repressed; rat catheter, Spider and flow model biofilm induced	YKR070W	YKR070W		Protein that may act as a chaperone for cytochrome c oxidase subunits; conserved protein; may act as a chaperone in the degradation of misfolded or unassembled cytochrome c oxidase subunits; localized to matrix face of the mitochondrial inner membrane; member of the AAA family but lacks a protease domain
	CAGL0H01221g	1.48151877963835		Ortholog(s) have RNA polymerase II core binding activity and role in DNA damage response, detection of DNA damage, mRNA 3'-end processing, negative regulation of transposition, RNA-mediated	CR_10730C		Ortholog(s) have RNA polymerase II core binding activity and role in DNA damage response, detection of DNA damage, mRNA 3'-end processing, negative regulation of transposition, RNA-mediated	YDR289C	RTT103		DNA Topoisomerase III; conserved protein that functions in a complex with Sgs1p and Rmi1p to relax single-stranded negatively-supercoiled DNA preferentially; DNA catenation/decatenation activity is stimulated by RPA and Sgs1p-Top3p-Rmi1p; involved in telomere stability and regulation of mitotic recombination
	CAGL0E04114g	1.49111745642822		Ortholog(s) have role in cellular response to oxidative stress, misfolded or incompletely synthesized protein catabolic process, protein import into peroxisome matrix and mitochondrial inner membrane localization	C4_06430C		Ortholog(s) have role in cellular response to oxidative stress, misfolded or incompletely synthesized protein catabolic process, protein import into peroxisome matrix and mitochondrial inner membrane localization	YEL052W	AFG1		Synthase subunit of trehalose-6-P synthase/phosphatase complex; synthesizes the storage carbohydrate trehalose, which is critically important for survival of long-term desiccation; also found in a monomeric form; expression is induced by the stress response and repressed by the Ras-cAMP pathway; protein abundance increases in response to DNA replication stress and in response to prolonged exposur…
	CAGL0G08470g	1.53409867024252		Ortholog(s) have DNA topoisomerase type I activity	C3_04740C		Ortholog(s) have DNA topoisomerase type I activity	YLR234W	TOP3	DNA topoisomerase 3|EDR1	MAPKKK acting in the protein kinase C signaling pathway; the kinase C signaling pathway controls cell integrity; upon activation by Pkc1p phosphorylates downstream kinases Mkk1p and Mkk2p; MAPKKK is an acronym for mitogen-activated protein (MAP) kinase kinase kinase
	CAGL0J09812g	1.53608603686902	TPS1	Ortholog(s) have alpha,alpha-trehalose-phosphate synthase (UDP-forming) activity	CR_05720W	TPS1	Trehalose-6-phosphate synthase; role in hyphal growth and virulence in mouse systemic infection; induced in presence of human neutrophils; macrophage/pseudohyphal-repressed after 16h; stationary phase enriched protein; Hap43-repressed	YBR126C	TPS1	alpha,alpha-trehalose-phosphate synthase (UDP-forming) TPS1|TSS1|GLC6|GGS1|FDP1|CIF1|BYP1	5' to 3' exonuclease, 5' flap endonuclease; required for Okazaki fragment processing and maturation, for long-patch base-excision repair and large loop repair (LLR), ribonucleotide excision repair; member of the S. pombe RAD2/FEN1 family; relocalizes to the cytosol in response to hypoxia
	CAGL0L03520g	1.65186271717105	BCK1	Ortholog(s) have MAP kinase kinase kinase activity	C7_02990W	BCK1	Ortholog of S. cerevisiae Bck1; MAP kinase kinase kinase of cell integrity pathway; mutant is hypersensitive to caspofungin	YJL095W	BCK1	mitogen-activated protein kinase kinase kinase BCK1|SSP31|SLK1|SAP3|LAS3	Plasma membrane protein, component of eisosomes; long-lived protein that remains stable in eisosomes of mother cells while other eisosome proteins, Pil1p and Lsp1p, turn over; may function to anchor the eisosome in place; sporulation and plasma membrane sphingolipid content are altered in mutants; localizes to furrow-like invaginations (MCC patches)
	CAGL0K11506g	1.78053382431232		Ortholog(s) have 5'-3' exodeoxyribonuclease activity involved in UV-damage excision repair, 5'-flap endonuclease activity, double-stranded DNA 5'-3' exodeoxyribonuclease activity, single-stranded DNA 5'-3' exodeoxyribonuclease activity	CR_04560C		Ortholog(s) have 5'-3' exodeoxyribonuclease activity involved in UV-damage excision repair, 5'-flap endonuclease activity, double-stranded DNA 5'-3' exodeoxyribonuclease activity, single-stranded DNA 5'-3' exodeoxyribonuclease activity	YKL113C	RAD27	multifunctional nuclease RAD27|FEN1|RTH1|ERC11	Nucleoside diphosphate kinase; catalyzes the transfer of gamma phosphates from nucleoside triphosphates, usually ATP, to nucleoside diphosphates by a mechanism that involves formation of an autophosphorylated enzyme intermediate; protein abundance increases in response to DNA replication stress
	CAGL0L01551g	1.79136778934266		Ortholog(s) have role in ascospore formation, cellular response to biotic stimulus, cellular response to chemical stimulus, cellular response to glucose starvation and cellular response to neutral pH, more	C6_01720C	SUR7	Protein required for normal cell wall, plasma membrane, cytoskeletal organization, endocytosis; localizes to eisosome subdomains of plasma membrane; four transmembrane motifs; mutant shows ectopic, chitin-rich cell wall; fluconazole-induced	YML052W	SUR7		Acid trehalase required for utilization of extracellular trehalose; involved in intracellular trehalose degradation during growth recovery after saline stress
	CAGL0M13277g	2.11956680894899		Ortholog(s) have NAD binding, nucleoside diphosphate kinase activity	C5_02890W	YNK1	Nucleoside diphosphate kinase (NDP kinase); homo-hexameric; soluble protein in hyphae; flucytosine induced; biofilm induced; macrophage-induced protein; stationary phase enriched protein; Spider biofilm repressed	YKL067W	YNK1	nucleoside diphosphate kinase|NDK1	Glycogen phosphorylase required for the mobilization of glycogen; non-essential; regulated by cyclic AMP-mediated phosphorylation; phosphorylation by Cdc28p may coordinately regulate carbohydrate metabolism and the cell cycle; expression is regulated by stress-response elements and by the HOG MAP kinase pathway
	CAGL0K05137g	2.14954477944479		Ortholog(s) have alpha,alpha-trehalase activity and role in cellular response to desiccation, cellular response to ethanol, cellular response to freezing, pathogenesis, trehalose catabolic process	C1_06940C	ATC1	Cell wall acid trehalase; catalyzes hydrolysis of the disaccharide trehalose; similar to S. cerevisiae vacuolar acid trehalase (Ath1p); Hap43p-repressed gene	YPR026W	ATH1	alpha,alpha-trehalase ATH1	Polo-like kinase; controls targeting and activation of Rho1p at cell division site via Rho1p guanine nucleotide exchange factors; regulates Spc72p; also functions in adaptation to DNA damage during meiosis; regulates the shape of the nucleus and expansion of the nuclear envelope during mitosis; similar to Xenopus Plx1 and S. pombe Plo1p; human homologs PLK1, PLK3 can each complement yeast cdc5 th…
	CAGL0F04895g	2.2117089915845		Ortholog(s) have glycogen phosphorylase activity, role in glycogen catabolic process, response to heat and cell surface, cytoplasm, hyphal cell wall localization	C7_00930W	GPH1	Putative glycogen phosphorylase; role in glycogen metabolism; regulated by Ssk1, Mig1, Tup1, Hap43; fluconazole-induced; localizes to cell surface of hyphae, not yeast; stationary phase enriched protein; Spider biofilm induced	YPR160W	GPH1	glycogen phosphorylase	Subunit of a replication-pausing checkpoint complex; Tof1p-Mrc1p-Csm3p acts at the stalled replication fork to promote sister chromatid cohesion after DNA damage, facilitating gap repair of damaged DNA; interacts with the MCM helicase; relocalizes to the cytosol in response to hypoxia
	CAGL0J11638g	2.28389193931815		Ortholog(s) have centromeric DNA binding, enzyme activator activity, phosphoprotein binding, protein serine/threonine kinase activity	C1_00950C	CDC5	Polo-like kinase; member of conserved Mcm1 regulon; depletion causes defects in spindle elongation and Cdc35-dependent filamentation; virulence-group-correlated expression; likely essential (UAU1 method); Spider biofilm repressed	YMR001C	CDC5	polo kinase CDC5|PKX2|MSD2	Subunit of the NuA4 histone acetyltransferase complex; NuA4 acetylates the N-terminal tails of histones H4 and H2A
	CAGL0J08250g	2.33283376164577		Ortholog(s) have DNA binding activity	C5_01460W	YBL053	Putative subunit of a replication fork-pausing checkpoint complex	YNL273W	TOF1		Putative transcription factor, contains Forkhead Associated domain; binds chromatin; involved in expression homeostasis, buffering of mRNA synthesis rate against gene dosage changes during S phase; target of SBF transcription factor; expression is periodic and peaks in G1; involved in DNA replication checkpoint response; interacts with Rpd3 and Set3 histone deacetylase complexes; APCC(Cdh1) subst…
	CAGL0K09746g	2.40035381915208		Ortholog(s) have role in DNA repair, histone acetylation, regulation of transcription from RNA polymerase II promoter and NuA4 histone acetyltransferase complex localization	CR_04130C	EAF7	Subunit of the NuA4 histone acetyltransferase complex	YNL136W	EAF7		Thioredoxin peroxidase; acts as both ribosome-associated and free cytoplasmic antioxidant; self-associates to form high-molecular weight chaperone complex under oxidative stress; chaperone activity essential for growth in zinc deficiency; required for telomere length maintenance; binds and modulates Cdc19p activity; protein abundance increases, forms cytoplasmic foci during DNA replication stress…
	CAGL0B01188g	2.41279520188708		Ortholog(s) have chromatin binding activity, role in cellular response to DNA damage stimulus, regulation of gene expression and Rpd3L-Expanded complex, mitochondrion localization	C1_11350C	TOS4	Putative fork-head transcription factor; rat catheter and Spider biofilm repressed	YLR183C	TOS4		GPI-anchored cell wall protein involved in weak acid resistance; basal expression requires Msn2p/Msn4p; expression is induced under conditions of stress and during the diauxic shift; SPI1 has a paralog, SED1, that arose from the whole genome duplication
	CAGL0G07271g	2.47897547071161		Putative thioredoxin peroxidase; protein differentially expressed in azole resistant strain	C3_06180C	TSA1	TSA/alkyl hydroperoxide peroxidase C (AhPC) family protein; similar to thiol-dependent peroxidases of oxidative stress signaling; antigenic; hyphal surface, nucleus; yeast-form nucleus, cytoplasm; biofilm, phagocytosis, peroxide induced	YML028W	TSA1	thioredoxin peroxidase TSA1|cTPxI|TPX1|ZRG14	Component of the heterotetrameric MHF histone-fold complex; in humans the MHF complex interacts with both DNA and Mph1p ortholog FANCM to stabilize and remodel blocked replication forks and repair damaged DNA; mhf2 srs2 double mutants are MMS hypersensitive; orthologous to human centromere constitutive-associated network (CCAN) subunit CENP-X, also known as MHF2
	CAGL0I06644g	2.99625806072337		Putative GPI-linked cell wall protein				YER150W	SPI1		response to acidic pH, fungal-type cell wall
	CAGL0I03432g	3.08548404165397		Ortholog(s) have role in cellular response to DNA damage stimulus and FANCM-MHF complex localization				YDL160C-A	MHF2		Peroxin; required for targeting of peroxisomal matrix proteins containing PTS2; interacts with Pex7p; partially redundant with Pex21p; primarily responsible for peroxisomal import during growth on oleate, and expression is induced during oleate growth
Peroxisome organization	CAGL0I02134g	-3.42167903463189	PEX21B	Ortholog(s) have role in protein import into peroxisome matrix and cytosol, peroxisome localization				YHR160C	PEX18		Peroxisomal integral membrane protein; involved in negative regulation of peroxisome size; partially functionally redundant with Pex31p; genetic interactions suggest action at a step downstream of steps mediated by Pex28p and Pex29p
	CAGL0I01870g	-2.30345265082216	PEX24	Ortholog(s) have role in peroxisome organization and cytosol, peroxisomal membrane localization	C3_04800C		Ortholog(s) have role in peroxisome organization and cytosol, peroxisomal membrane localization	YHR150W	PEX28		Peroxin required for peroxisomal matrix protein targeting; acts on proteins containing the PTS2 targeting sequence; interacts with Pex7p; constitutively expressed; partially redundant with Pex18p; required for import of the Gpd1p-Pnc1p heterodimer in which only Gpd1p has a peroxisomal targeting signal; relative distribution to cytoplasmic foci increases upon DNA replication stress
	CAGL0M06061g	-2.21883436952407	PEX32	Ortholog(s) have role in peroxisome organization and integral component of peroxisomal membrane localization	C1_11010C		Putative ortholog of S. cerevisiae Pex32 a peroxisomal integral membrane protein with a role in negative regulation of peroxisome size; Hap43-repressed gene	YBR168W	PEX32		Peripheral peroxisomal membrane protein; involved in controlling peroxisome size and number, interacts with Pex25p; PEX27 has a paralog, PEX25, that arose from the whole genome duplication
	CAGL0F08019g	-1.51228230324504	PEX21	Ortholog(s) have role in positive regulation of binding, protein import into peroxisome matrix and cytosol, peroxisome localization				YGR239C	PEX21		ER-resident protein involved in peroxisomal biogenesis; ER-localized protein that associates with peroxisomes; interacts with Pex29p and reticulons Rtn1p and Yop1p to regulate peroxisome biogenesis from the ER; role in peroxisomal-destined vesicular flow from the ER; partially redundant with Pex31p; may function at a step downstream of steps mediated by Pex28p and Pex29p; PEX30 has a paralog, PEX…
	CAGL0I10879g	-1.26435089124018	PEX25	Ortholog(s) have role in peroxisome organization and peroxisomal membrane localization				YOR193W	PEX27		Peroxisomal membrane protein (PMP); required for proper localization and stability of PMPs; anchors peroxisome retention factor Inp1p at the peroxisomal membrane; interacts with Pex19p
	CAGL0A00957g	-1.17189669910504	PEX23B	Ortholog(s) have role in ER-dependent peroxisome organization and cellular bud, endoplasmic reticulum, integral component of peroxisomal membrane, plasma membrane localization	C2_00190C		Putative integral peroxisomal membrane protein; Hap43p-repressed gene	YLR324W	PEX30	peroxisome biogenesis protein	Reticulon-interacting protein; ER integral membrane protein involved in the generation of tubular ER morphology; promotes membrane curvature; forms tubules in vitro; regulates the ER asymmetry-induced inheritance block during ER stress; role in ER-derived peroxisomal biogenesis; interacts with Yip1p to mediate membrane traffic and with Sey1p to maintain ER morphology; facilitates lipid exchange b…
	CAGL0M01342g	-1.0668088276565	PEX3	Peroxisomal assembly protein required for peroxisome biogenesis	C1_07420C	PEX3	Putative peroxisomal protein involved in targeting proteins into peroxisomes; possibly an essential gene, disruptants not obtained by UAU1 method	YDR329C	PEX3	PAS3
	CAGL0K05203g	1.91335364324516		Ortholog(s) have role in ER-dependent peroxisome organization, cellular protein localization, endoplasmic reticulum inheritance and endoplasmic reticulum tubular network organization, more	C2_08160C		Ortholog(s) have role in ER-dependent peroxisome organization, cellular protein localization, endoplasmic reticulum inheritance and endoplasmic reticulum tubular network organization, more	YPR028W	YOP1	YIP2	Protein of unknown function; contains transmembrane domains; involved in secretion of proteins that lack classical secretory signal sequences; component of the detergent-insoluble glycolipid-enriched complexes (DIGs); NCE102 has a paralog, FHN1, that arose from the whole genome duplication
Cytoskeleton organization	CAGL0L08448g	-1.21374434143217		Ortholog(s) have role in actin cytoskeleton organization, eisosome assembly, establishment of protein localization to plasma membrane and negative regulation of protein phosphorylation, more	C3_04910C	NCE102	Non classical protein export protein; localized to plasma membrane; Hap43-induced gene; flow model biofilm induced; Spider biofilm induced	YPR149W	NCE102	NCE2	Cytoplasmic light chain dynein, microtubule motor protein; required for intracellular transport and cell division; involved in mitotic spindle positioning; forms complex with dynein intermediate chain Pac11p that promotes Dyn1p homodimerization, potentiates motor processivity; Dyn2p-Pac11p complex important for interaction of dynein motor complex with dynactin complex; acts as molecular glue to d…
	CAGL0G00550g	-1.19547054129044		Ortholog(s) have cytoplasm localization	C5_04870W		Ortholog of Hua1, a zinc finger domain protein with sequence similarity to Type I J-proteins; flow model biofilm induced	YGR268C	HUA1		Component of yeast cortical actin cytoskeleton; binds and cross links actin filaments; originally identified by its homology to calponin (contains a calponin-like repeat) but the Scp1p domain structure is more similar to transgelin
	CAGL0F03091g	-1.1169633220948		Ortholog(s) have ATP-dependent microtubule motor activity, plus-end-directed activity	C2_01440C		Ortholog(s) have ATP-dependent microtubule motor activity, plus-end-directed activity	YDR424C	DYN2	dynein light chain|SLC1	Major isoform of tropomyosin; binds to and stabilizes actin cables and filaments, which direct polarized cell growth and the distribution of several organelles; acetylated by the NatB complex and acetylated form binds actin most efficiently; TPM1 has a paralog, TPM2, that arose from the whole genome duplication
	CAGL0J07172g	-1.08788915010347		Ortholog(s) have actin filament binding, protein binding, bridging activity and role in actin crosslink formation, chronological cell aging, mitotic cytokinesis	C2_06370C	SCP1	Putative cortical actin cytoskeleton protein; constitutive expression independent of MTL or white-opaque status	YOR367W	SCP1		Type V myosin motor involved in actin-based transport of cargos; required for the polarized delivery of secretory vesicles, the vacuole, late Golgi elements, peroxisomes, and the mitotic spindle; MYO2 has a paralog, MYO4, that arose from the whole genome duplication
	CAGL0J05434g	1.03909530111911		Ortholog(s) have role in actin filament bundle assembly, actin filament reorganization, pseudohyphal growth and actin filament bundle, cellular bud neck contractile ring localization	CR_08460W	TPM2	Putative tropomyosin isoform 2; regulated by Gcn4; repressed by amino acid starvation; macrophage-induced; protein levels decrease in stationary cells; Hap43-induced; rat catheter and Spider biofilm repressed	YNL079C	TPM1	tropomyosin TPM1	CAP (cyclase-associated protein); N-terminus binds adenylate cyclase and facilitates activation by RAS; N-terminus forms novel hexameric star-shaped shuriken structures that directly catalyze cofilin-mediated severing of actin filaments; C-terminus binds and recycles cofilin bound, ADP-actin monomers, facilitating regulation of actin dynamics and cell morphogenesis; N- and C-termini can function …
	CAGL0F00671g	1.05069918618375		Ortholog(s) have actin filament binding, calmodulin binding, microfilament motor activity	C1_13780W	MYO2	Class V myosin; nonessential; sole class V myosin in C. albicans; required for WT actin cytoskeletal polarity, nuclear organization, migration, hyphal growth; conserved myosin ATPase/tail domains; Hap43-induced; flow model biofilm repressed	YOR326W	MYO2	myosin 2|CDC66	Minus-end-directed microtubule motor; functions in mitosis and meiosis, localizes to the spindle pole body and localization is dependent on functional Cik1p, required for nuclear fusion during mating; potential Cdc28p substrate
	CAGL0K09790g	1.05566686100517		Ortholog(s) have actin binding, adenylate cyclase binding activity	CR_04190W	SRV2	Adenylate cyclase-associated protein; regulates adenylate cyclase activity; required for wild-type germ tube formation and for virulence in mice; mutant defects in filamentous growth are rescued by cAMP or dbcAMP; Spider biofilm repressed	YNL138W	SRV2	adenylate cyclase-binding protein|CAP	Component of the kinetochore-associated Ndc80 complex; involved in chromosome segregation, spindle checkpoint activity, and kinetochore clustering; evolutionarily conserved; other members include Ndc80p, Nuf2p, Spc24p, and Spc25p
	CAGL0D04994g	1.06283103997824	KAR3	Minus-end-directed microtubule motor	C2_09370C	KAR3	Kinesin-like microtubule motor protein; required for nuclear fusion during mating; C-terminal motor domain; mutants are viable; null has high-frequency white-opaque switching phenotype	YPR141C	KAR3	OSR11
	CAGL0K03619g	1.08863039028501		Ortholog(s) have structural constituent of cytoskeleton activity, role in chromosome segregation, microtubule nucleation and Ndc80 complex, condensed nuclear chromosome kinetochore localization	C2_01730W		Ortholog of S, cerevisiae Spc24; a component of the conserved kinetochore-associated Ndc80 complex involved in chromosome segregation, spindle checkpoint activity and kinetochore clustering; Hap43-induced gene	YMR117C	SPC24	kinetochore-associated Ndc80 complex subunit SPC24	Alpha-tubulin; associates with beta-tubulin (Tub2p) to form tubulin dimer, which polymerizes to form microtubules; expressed at lower level than Tub1p; TUB3 has a paralog, TUB1, that arose from the whole genome duplication
	CAGL0K02783g	1.09751944455243		Ortholog(s) have actin filament binding activity and role in actin cytoskeleton organization, barbed-end actin filament capping, cellular protein localization, mitotic cytokinesis, regulation of cell shape							Protein involved in membrane-trafficking events at plasma membrane; interacts with actin regulators Sla1p and Las17p, ubiquitin, Arf3p to couple actin dynamics to membrane trafficking processes; similar structure to GGA family of proteins with N-terminal VHS domain and GAT domain; binds Las17p, which is homolog of human Wiskott-Aldrich Syndrome protein involved in actin patch assembly, actin poly…
	CAGL0B02497g	1.09831343414136		Ortholog(s) have structural constituent of cytoskeleton activity, role in microtubule polymerization, nuclear division and cytoplasmic microtubule, spindle, spindle pole body, tubulin complex localization				YML124C	TUB3	alpha-tubulin TUB3	Protein required for normal actin organization and endocytosis; targeting subunit for protein phosphatase type 1; undergoes Crm1p-dependent nuclear-cytoplasmic shuttling; multicopy suppressor of clathrin deficiency
	CAGL0B00814g	1.12358731060422		Ortholog(s) have role in actin cortical patch localization, actin filament organization, endocytosis and actin cortical patch, cytosol, mitotic spindle pole body localization	C2_09710C		Ortholog of S. cerevisiae/S. pombe Lsb5; predicted role in actin cortical patch localization, actin filament organization, endocytosis; flow model biofilm induced; Spider biofilm repressed	YCL034W	LSB5		Essential protein required for determination of budding pattern; promotes localization of axial markers Bud4p and Cdc12p and functionally interacts with Sec3p, localizes to the contractile ring during anaphase, member of the IQGAP family; relocalizes from bud neck to cytoplasm upon DNA replication stress
	CAGL0E05302g	1.16235198923572		Ortholog(s) have protein phosphatase 1 binding activity, role in actin filament organization, cortical actin cytoskeleton organization, endocytosis, protein secretion and actin cortical patch, nucleus localization	CR_08980C		Ortholog(s) have protein phosphatase 1 binding activity, role in actin filament organization, cortical actin cytoskeleton organization, endocytosis, protein secretion and actin cortical patch, nucleus localization	YOR329C	SCD5	SCD7|FTB1	Microtubule-associated protein (MAP) of the XMAP215/Dis1 family; regulates microtubule dynamics during spindle orientation and metaphase chromosome alignment; interacts with spindle pole body component Spc72p
	CAGL0H00891g	1.21579130778129		Ortholog(s) have actin binding, calmodulin binding activity	C7_01840W	IQG1	Actomyosin ring component at bud neck; cell-cycle regulated ser phosphorylation at CDK sites regulate association with Bni1/Bnr1, Iqg1 degradation, and ring disassembly; mutation causes cytokinetic defects; rat catheter biofilm repressed	YPL242C	IQG1	CYK1	Beta-tubulin; associates with alpha-tubulin (Tub1p and Tub3p) to form tubulin dimer, which polymerizes to form microtubules; mutation in human ortholog is associated with congenital fibrosis of the extraocular muscles (CFEOM) with polymicrogyria
	CAGL0M07898g	1.2731579774935		Ortholog(s) have microtubule binding, structural constituent of cytoskeleton activity	CR_09520C		Ortholog(s) have microtubule plus-end binding, structural constituent of cytoskeleton activity	YLR045C	STU2		Ser-Thr protein kinase; member (with Ark1p and Prk1p) of the Ark kinase family; involved in endocytosis and actin cytoskeleton organization
	CAGL0K12650g	1.28053096614149	TUB2	Beta-tubulin; protein abundance decreased in ace2 mutant cells	C1_00710C	TUB2	Beta-tubulin; functional homolog of ScTub2; overproduction makes S. cerevisiae inviable; has two introns; GlcNAc, hypha fluconazole-induced; slow growth, ectopic expression increases white-to opaque switch; rat catheter biofilm repressed	YFL037W	TUB2	beta-tubulin|SHE8|ARM10	Dynein intermediate chain, microtubule motor protein; required for intracellular transport and cell division; acts in cytoplasmic dynein pathway; forms complex with dynein light chain Dyn2p that promotes Dyn1p homodimerization and potentiates motor processivity; Dyn2p-Pac11p complex is also important for interaction of dynein motor complex with dynactin complex; forms cortical cytoplasmic microtu…
	CAGL0H10208g	1.47275702228972		Ortholog(s) have protein kinase activity, role in actin cytoskeleton organization, protein phosphorylation, regulation of endocytosis and cell periphery, cellular bud neck, cytoplasm, prospore membrane localization	C2_10750C	AKL1	Putative serine/threonine protein kinase; induced during the mating process	YBR059C	AKL1	serine/threonine protein kinase AKL1	Protein required for structural integrity of elongating spindles; localizes to the kinetochore; interacts with histones H2A, H2B, and H4; phosphorylated by Ipl1p; orthologous to human centromere constitutive-associated network (CCAN) subunit CENP-C and fission yeast cnp3
	CAGL0G04565g	1.54726892742823		Ortholog(s) have ATP-dependent microtubule motor activity, plus-end-directed activity				YDR488C	PAC11	dynein intermediate chain	SH3 domain protein implicated in regulating actin polymerization; able to recruit actin polymerization machinery through its SH3 domains; colocalizes with cortical actin patches and Las17p; interacts with type I myosins
	CAGL0M10131g	1.54879272395126	MIF2	Inner kinetochore protein	C6_02780C	MIF2	Centromere-associated protein; similar to CENP-C proteins; Cse4p and Mif2p colocalize at C. albicans centromeres	YKL089W	MIF2		Component of the kinetochore-associated Ndc80 complex; involved in chromosome segregation, spindle checkpoint activity, and kinetochore clustering; evolutionarily conserved; other members include Ndc80p, Nuf2p, Spc24p, and Spc25p
	CAGL0I02750g	1.55887499735786		Ortholog(s) have enzyme activator activity, role in actin nucleation, endocytosis, response to salt stress and actin cortical patch, cell division site, cell tip, cellular bud neck, mating projection tip, plasma membrane localization	C3_01500C	BZZ1	Protein similar to S. cerevisiae Bzz1p, which is an SH3 domain protein involved in the regulation of actin polymerization	YHR114W	BZZ1	LSB7	Protein that regulates actin cytoskeleton organization; required for cytokinesis, actin cable organization, and secretory vesicle trafficking; localized to bud neck; phosphorylated by Dbf2p; regulates actomyosin ring dynamics and septin localization; contains an SH3 domain; N terminus controls cell size and levels of actin cables, while C terminus controls actin cable organization via direct regu…
	CAGL0M11858g	1.58158213186994		Ortholog(s) have structural constituent of cytoskeleton activity, role in chromosome segregation, microtubule nucleation and Ndc80 complex, condensed nuclear chromosome kinetochore localization				YER018C	SPC25	kinetochore-associated Ndc80 complex subunit SPC25	Component of the microtubule-nucleating Tub4p (gamma-tubulin) complex; interacts with Spc110p at the spindle pole body (SPB) inner plaque and with Spc72p at the SPB outer plaque
	CAGL0F05885g	1.85718124078891		Ortholog(s) have cytoskeletal protein binding activity	C4_00370W	HOF1	Ortholog of S. cerevisiae Hof1; a protein localized to the bud neck and required for cytokinesis in S. cerevisiae; periodic mRNA expression, peak at cell-cycle G2/M phase; mutant is viable	YMR032W	HOF1	formin-binding protein HOF1|CYK2	Inner plaque spindle pole body (SPB) component; ortholog of human kendrin; gamma-tubulin small complex (gamma-TuSC) receptor that interacts with Spc98p to recruit the complex to the nuclear side of the SPB, connecting nuclear microtubules to the SPB; promotes gamma-TuSC assembly and oligomerization to initiate microtubule nucleation; interacts with Tub4p-complex and calmodulin; phosphorylated by …
	CAGL0I02464g	1.90320703345428		Putative component of microtubule-nucleating complex; gene is upregulated in azole-resistant strain	CR_06740W		Ortholog(s) have structural constituent of cytoskeleton activity	YHR172W	SPC97		Essential light chain for Myo1p; light chain for Myo2p; stabilizes Myo2p by binding to the neck region; interacts with Myo1p, Iqg1p, and Myo2p to coordinate formation and contraction of the actomyosin ring with targeted membrane deposition
	CAGL0A02596g	1.91574744717575		Ortholog(s) have structural constituent of cytoskeleton activity				YDR356W	SPC110	NUF1|XCM1	Formin; polarisome component; nucleates the formation of linear actin filaments, involved in cell processes such as budding and mitotic spindle orientation which require the formation of polarized actin cables; recruited to the division site in a Glc7p/Ref2p dependent manner following release of Bnr1p; functionally redundant with BNR1
	CAGL0F07491g	1.92657076211253		Ortholog(s) have myosin II heavy chain binding, myosin V binding activity and role in mitotic actomyosin contractile ring assembly actin filament organization, protein localization to medial cortex, vesicle targeting	CR_03090C	MLC1	Microtubule-dependent localized protein; at Spitzenkorper and cytokinetic ring in hyphae; cell-cycle dependent localization to tip polarisome, bud neck in yeast and pseudohyphae; sumoylation target; rat catheter, Spider biofilm repressed	YGL106W	MLC1		Kinesin-related motor protein involved in mitotic spindle positioning; stabilizes microtubules by targeting Bik1p to the plus end; functions as a microtubule polymerase and catastrophe inhibitor in vitro; Kip2p levels are controlled during the cell cycle
	CAGL0J08206g	2.03757216247843		Ortholog(s) have F-bar domain binding, cytoskeletal protein binding, profilin binding activity	C1_12960C	BNI1	Formin; role in cytoskeletal organization, cell polarity; role in systemic virulence in mouse; cell-cycle regulated localization to site of polarized growth, bud neck; localizes to Spitzenkorper of hyphae, minor localization at septum	YNL271C	BNI1	formin BNI1|SHE5|PPF3	Spindle positioning factor; orients astral microtubules, connecting them to actin cables at the cortex with Bim1p and Myo2, resulting in proper spindle positioning; targeted for StuBL-dependent degradation at kinetochores by Slx5p-Slx8p, ensuring chromosome transmission fidelity and correct spindle positioning; role in karyogamy; localizes to the shmoo tip, the growing bud-tip, the nucleus, the k…
	CAGL0M02189g	2.04227076966185		Ortholog(s) have ATP-dependent microtubule motor activity, plus-end-directed, microtubule binding, plus-end directed microfilament motor activity	C2_10310C	KIP2	Putative kinesin-related motor protein involved in mitotic spindle positioning; repressed by alpha pheromone in SpiderM medium; periodic mRNA expression, peak at cell-cycle G2/M phase	YPL155C	KIP2		Gamma-tubulin small complex (gamma-TuSC) receptor; recruits the gamma-TuSC complex to the cytoplasmic side of the SPB, connecting nuclear microtubules to the SPB; involved in astral microtubule formation, stabilization, and with Stu2p, anchoring astral MTs at the cytoplasmic face of the SPB, and regulating plus-end MT dynamics; regulated by Cdc5 kinase
	CAGL0A01155g	2.18763252768331		Ortholog(s) have role in establishment of spindle localization, mitotic spindle orientation checkpoint, nuclear migration along microtubule	C1_13740W	KAR9	Ortholog of S. cerevisiae Kar9; role in mitotic spindle positioning; nonessential; localizes to bud tip, bud neck, hyphal tip; wild-type localization requires actin and microtubule cytoskeleton; induced by alpha factor	YPL269W	KAR9		Cyclin, interacts with cyclin-dependent kinase Pho85p; member of the Pcl1,2-like subfamily, involved in the regulation of polarized growth and morphogenesis and progression through the cell cycle; localizes to sites of polarized cell growth; PCL2 has a paralog, PCL9, that arose from the whole genome duplication
	CAGL0M12254g	2.45209037338176		Ortholog(s) have structural constituent of cytoskeleton activity and role in microtubule nucleation, mitotic spindle elongation, mitotic spindle orientation checkpoint, nuclear migration along microtubule				YAL047C	SPC72	gamma-tubulin complex subunit SPC72|LDB4	Component of the yeast dynactin complex; consisting of Nip100p, Jnm1p, and Arp1p; required for proper nuclear migration and spindle partitioning during mitotic anaphase B
	CAGL0J09328g	2.68633527270055		Ortholog(s) have cyclin-dependent protein serine/threonine kinase regulator activity	C1_08570C	PCL2	Cyclin homolog; reduced expression observed upon depletion of Cln3; farnesol regulated; periodic mRNA expression, peak at cell-cycle G1/S phase; Hap43-induced; rat catheter biofilm repressed	YDL127W	PCL2	cyclin PCL2|CLN4	Component of the spindle pole body outer plaque; required for spindle orientation and mitotic nuclear migration; CNM67 has a paralog, ADY3, that arose from the whole genome duplication
	CAGL0M13607g	2.85604866435252		Ortholog(s) have structural constituent of cytoskeleton activity, role in establishment of mitotic spindle orientation, nuclear migration and astral microtubule, cell cortex, dynactin complex, spindle pole body localization	C5_04890C		Ortholog(s) have structural constituent of cytoskeleton activity, role in establishment of mitotic spindle orientation, nuclear migration and astral microtubule, cell cortex, dynactin complex, spindle pole body localization	YMR294W	JNM1	PAC3|INS1
	CAGL0J07348g	2.9191933079729		Ortholog(s) have structural constituent of cytoskeleton activity, role in microtubule nucleation, mitotic spindle organization and outer plaque of spindle pole body localization				YNL225C	CNM67
Cell wall organization	CAGL0F00891g	-3.33025072422909		Ortholog(s) have role in ascospore wall assembly and ascospore wall, ascus lipid particle, cytoplasm, prospore membrane localization				YOL047C	LDS2		Shmoo tip protein, substrate of Hub1p ubiquitin-like protein; mutants are defective for mating projection formation, thereby implicating Hbt1p in polarized cell morphogenesis; HBT1 has a paralog, YNL195C, that arose from the whole genome duplication
	CAGL0B02926g	-2.93577821522564	BMT3	Beta mannosyltransferase							Rho GTPase activating protein (RhoGAP); stimulates the intrinsic GTPase activity of Rho1p, which plays a bud growth by regulating actin cytoskeleton organization and cell wall biosynthesis, resulting in the downregulation of Rho1p; structurally and functionally related to Sac7p; BAG7 has a paralog, SAC7, that arose from the whole genome duplication
	CAGL0G05984g	-2.9301824211415		Ortholog(s) have role in ascospore wall assembly				YHR139C	SPS100
	CAGL0I07249g	-2.05699156014452		Putative GTPase-activating protein involved in cell wall and cytoskeleton homeostasis; gene is upregulated in azole-resistant strain				YOR134W	BAG7
	CAGL0H09592g	-1.80357079005502		Putative GPI-linked cell wall protein
	CAGL0F00869g	-1.78926152749185		Ortholog(s) have role in ascospore wall assembly and ascospore wall, lipid particle, prospore membrane localization	CR_08380C		Protein of unknown function; decreased transcription is observed in an azole-resistant strain that overexpresses MDR1	YOL048C	RRT8		Putative glycoside hydrolase of the mitochondrial intermembrane space
	CAGL0B02904g	-1.72175668761602	BMT6	Beta mannosyltransferase
	CAGL0H10120g	-1.70693566518961		Ortholog(s) have glucan endo-1,6-beta-glucosidase activity and role in fungal-type cell wall beta-glucan metabolic process, fungal-type cell wall disassembly involved in conjugation with cellular fusion	C1_14060W		Glucan 1,3-beta-glucosidase; regulated by Nrg1, Tup1 and possibly Tac1; induced by NO and during cell wall regeneration; stationary phase enriched; possibly essential (UAU1 method); F-12/CO2 early biofilm induced; flow biofilm repressed	YBR056W	YBR056W	17-beta-hydroxysteroid dehydrogenase-like protein	Cell wall mannoprotein; expression is downregulated at acidic pH and induced by cold shock and anaerobiosis; abundance is increased in cells cultured without shaking; member of the Srp1p/Tip1p family of serine-alanine-rich proteins
	CAGL0B02948g	-1.5650876940946	BMT4	Beta mannosyltransferase
	CAGL0H09614g	-1.50828128767664		Putative GPI-linked cell wall protein				YER011W	TIR1	GPI-anchored mannoprotein|SRP1	Nuclear ubiquitin protein ligase binding protein; may regulate utilization of nonfermentable carbon sources and endocytosis of plasma membrane proteins; overproduction suppresses chs5 spa2 lethality at high temp; ubiquitinated by Rsp5p, deubiquitinated by Ubp2p; CSR2 has a paralog, ECM21, that arose from the whole genome duplication
	CAGL0K05247g	-1.48619814978928		Ortholog(s) have ubiquitin protein ligase binding activity, role in fungal-type cell wall organization, regulation of transcription from RNA polymerase II promoter and cytosol, nucleus localization				YPR030W	CSR2	ART8|MRG19
	CAGL0D00286g	-1.46293457365045	BMT1	Beta mannosyltransferase							Cell wall mannoprotein that localizes to birth scars of daughter cells; linked to a beta-1,3- and beta-1,6-glucan heteropolymer through a phosphodiester bond; required for propionic acid resistance
	CAGL0B02882g	-1.44521027669145	BMT2	Beta mannosyltransferase; transmembrane domain protein similar to C. albicans WRY family; gene is downregulated in azole-resistant strain							Protein of unknown function; green fluorescent protein (GFP)-fusion protein localizes to the cytoplasm in a punctate pattern; YDR222W has a paralog, YLR225C, that arose from the whole genome duplication
	CAGL0F07579g	-1.38168419837772	CWP1.2	Putative GPI-linked cell wall protein				YKL096W	CWP1	YJU1	Protein of unknown function reputedly involved in spore wall assembly
	CAGL0K12980g	-1.35001993593763	BMT7	Beta mannosyltransferase
	CAGL0F01859g	-1.27124809156186		Ortholog(s) have role in ascospore wall assembly and cytoplasm, prospore membrane localization				YLR054C	OSW2		Putative GPI-anchored aspartic protease; member of the yapsin family of proteases involved in cell wall growth and maintenance; located in the cytoplasm and endoplasmic reticulum
	CAGL0J11242g	-1.24241791844286		Ortholog(s) have GTP binding, GTPase activity and role in filamentous growth of a population of unicellular organisms, fungal-type cell wall organization	C1_06730W	RAC1	G-protein of RAC subfamily; required for embedded filamentous growth, not for serum-induced hyphal growth; dynamic localization at plasma membrane and nucleus; similar to, but not interchangeable with, Cdc42p; lacks S. cerevisiae homolog	YNL180C	RHO5	Rho family GTPase RHO5|YNS0
	CAGL0A02431g	-1.18266437346136	YPS7	Putative aspartic protease; predicted GPI-anchor; expression induced at high temperature	C7_02300W	YPS7	Putative aspartic-type endopeptidase with limited ability to degrade alpha pheromone; mutants show increased sensitivity to alpha pheromone	YDR349C	YPS7	putative aspartic endopeptidase
	CAGL0L07854g	-1.08379153534704	CWH43	Ortholog(s) have role in GPI anchor biosynthetic process, fungal-type cell wall organization and cellular bud neck, cellular bud tip, endoplasmic reticulum, integral component of plasma membrane localization	CR_01290C	CWH43	Putative sensor/transporter protein with a predicted role in cell wall biogenesis; possibly an essential gene, disruptants not obtained by UAU1 method; flow model and rat catheter biofilm repressed	YCR017C	CWH43		Flavin adenine dinucleotide transporter; required for uptake of FAD into endoplasmic reticulum; involved in cell wall maintenance; FLC1 has a paralog, FLC3, that arose from the whole genome duplication
	CAGL0E05940g	-1.05089658278926		Ortholog(s) have FAD transmembrane transporter activity, calcium channel activity				YPL221W	FLC1	flavin adenine dinucleotide transporter|BOP1|HUF1	EH domain-containing protein involved in endocytosis; actin cytoskeletal organization and cell wall morphogenesis; forms a complex with Sla1p and Pan1p
	CAGL0K12408g	1.00813339894773		Ortholog(s) have phosphatidylinositol deacylase activity	C1_04190C	BST1	Inositol deacylase involved in attachment of GPI-anchored proteins to cell wall; required for host invasion and immune escape	YFL025C	BST1	PER17	Sporulation-specific exo-1,3-beta-glucanase; contributes to ascospore thermoresistance; SPR1 has a paralog, EXG1, that arose from the whole genome duplication
	CAGL0J05544g	1.11920728264406		Ortholog(s) have protein binding, bridging activity, role in ascospore wall assembly, endocytosis and cell periphery, mating projection tip localization	C3_01400W	END3	Regulated by Gcn4p; induced in response to amino acid starvation (3-aminotriazole treatment)	YNL084C	END3		Protein involved in mitochondrion organization; functions with Nca2p to regulate mitochondrial expression of subunits 6 (Atp6p) and 8 (Atp8p) of the Fo-F1 ATP synthase; SWAT-GFP, seamless-GFP and mCherry fusion proteins localize to the vacuole; member of the SUN family; expression induced in cells treated with the mycotoxin patulin; NCA3 has a paralog, UTH1, that arose from the whole genome dupli…
	CAGL0G09515g	1.18397493608411		Ortholog(s) have glucan exo-1,3-beta-glucosidase activity, role in ascospore formation and ascospore wall, fungal-type vacuole, prospore membrane localization				YOR190W	SPR1	glucan 1,3-beta-glucosidase|SSG1	Component of the exomer complex; the exomer which also contains Csh6p, Bch1p, Bch2p, and Bud7, is involved in the export of select proteins, such as chitin synthase Chs3p, from the Golgi to the plasma membrane; interacts selectively with the activated, GTP-bound form of Arf1p; Chs5p is the only protein with a BRCT domain that is not localized to the nucleus
	CAGL0L05434g	1.31239541371139	SUN4	Ortholog(s) have role in fungal-type cell wall organization or biogenesis, mitochondrion organization and fungal-type cell wall, fungal-type vacuole localization				YJL116C	NCA3	SUN family protein NCA3	Covalently linked cell wall mannoprotein; major constituent of the cell wall; plays a role in stabilizing the cell wall; involved in low pH resistance; precursor is GPI-anchored
	CAGL0G00814g	1.33855188077807	CHS5	Ortholog(s) have small GTPase binding activity	C2_04140W	CHS5	Putative chitin biosynthesis protein; fungal-specific; repressed upon yeast-to-hypha switch; rat catheter biofilm repressed	YLR330W	CHS5	CAL3	1,3-beta-glucanosyltransferase; has similarity to Gas1p; localizes to the cell wall
	CAGL0F07601g	1.34248762715349	CWP1.1	GPI-linked cell wall protein				YKL096W-A	CWP2	YKL097W-A|LPR1	Cell wall protein that contains a putative GPI-attachment site; secreted by regenerating protoplasts; up-regulated by activation of the cell integrity pathway, as mediated by Rlm1p; upregulated by cell wall damage via disruption of FKS1; PST1 has a paralog, ECM33, that arose from the whole genome duplication
	CAGL0F01287g	1.40725277512862	GAS5	Putative transglycosidase with a predicted role in the elongation of 1,3-beta-glucan	C5_05390C	PGA4	GPI-anchored cell surface protein; beta-1,3-glucanosyltransferase with similarity to the A. fumigatus GEL family; transcript induced in RHE model of oral candidiasis; fluconazol-induced	YOL030W	GAS5	1,3-beta-glucanosyltransferase	O-glycosylated covalently-bound cell wall protein; required for cell wall stability; expression is cell cycle regulated, peaking in M/G1 and also subject to regulation by the cell integrity pathway; coding sequence contains length polymorphisms in different strains; PIR3 has a paralog, HSP150, that arose from the whole genome duplication
	CAGL0E04620g	1.51067240302226	PST1	Ecm33-family protein with a predicted role in cell wall biogenesis and organization; predicted GPI-anchor				YDR055W	PST1	HPF2
	CAGL0M08514g	1.52415850849811	PIR5	Pir protein family member, putative cell wall component				YKL163W	PIR3	beta-1,3-glucan linked protein|CCW8	Chitin synthase II; catalyzes transfer of N-acetylglucosamine (GlcNAc) to chitin upon activation of zymogenic form; required for chitin synthesis in the primary septum during cytokinesis; localization regulated by Cdk1p during mitosis; phosphorylation by Dbf2p kinase regulates its dynamics and chitin synthesis during cytokinesis
	CAGL0G00286g	1.59971036923046	GAS1	Putative glycoside hydrolase of the Gas/Phr family; predicted GPI-anchor							Structural constituent of the cell wall; attached to the plasma membrane by a GPI-anchor; expression is upregulated in response to cell wall stress; null mutant is sensitive to the antifungal agent polyhexamethylene biguanide, resistant to zymolyase treatment and has increased chitin deposition
	CAGL0I04818g	1.63590058263307		Ortholog(s) have chitin synthase activity	C7_02770W	CHS1	Chitin synthase; essential; for primary septum synthesis in yeast and hyphae; 1 of several chitin synthases; enzymatically activated by proteolytic processing; complements defects of S. cerevisiae chs1 or chs2; Spider biofilm repressed	YBR038W	CHS2	chitin synthase CHS2
	CAGL0A04081g	1.66419978804549		Predicted GPI-linked cell wall protein				YLR194C	YLR194C		Protein involved in spore wall assembly; has similarity to 1,3-beta-D-glucan synthase catalytic subunits Fks1p and Gsc2p; the authentic, non-tagged protein is detected in highly purified mitochondria in high-throughput studies
	CAGL0C02211g	1.70584108010813	UTR2	Putative glycoside hydrolase of the Crh family; predicted GPI-anchor							O-mannosylated heat shock protein; secreted and covalently attached to the cell wall via beta-1,3-glucan and disulfide bridges; required for cell wall stability; induced by heat shock, oxidative stress, and nitrogen limitation; HSP150 has a paralog, PIR3, that arose from the whole genome duplication
	CAGL0M13827g	1.73484313768076	FKS3	Putative 1,3-beta-d-glucan synthase component				YMR306W	FKS3	putative 1,3-beta-D-glucan synthase	GDP-mannose pyrophosphorylase (mannose-1-phosphate guanyltransferase); synthesizes GDP-mannose from GTP and mannose-1-phosphate in cell wall biosynthesis; required for normal cell wall structure
	CAGL0I06182g	1.82288126253753	PIR2	Pir protein family member, putative cell wall component				YJL159W	HSP150	heat shock protein HSP150|PIR2|ORE1|CCW7	Glycosylphosphatidylinositol-dependent cell wall protein; expression is periodic and decreases in respone to ergosterol perturbation or upon entry into stationary phase; depletion increases resistance to lactic acid
	CAGL0D01034g	1.90510814951763	VIG9	GDP-mannose pyrophosphorylase involved in the synthesis of GDP-mannose for protein glycosylation	C3_07950C	SRB1	Essential GDP-mannose pyrophosphorylase; makes GDP-mannose for protein glycosylation; functional in S. cerevisiae psa1; on yeast-form, not hyphal cell surface; alkaline induced; induced on adherence to polystyrene; Spider biofilm repressed	YDL055C	PSA1	mannose-1-phosphate guanylyltransferase|SRB1|VIG9|MPG1	Exo-1,3-beta-glucanase; involved in cell wall beta-glucan assembly; may be anchored to the plasma membrane via a glycosylphosphatidylinositol (GPI) anchor
	CAGL0M08756g	1.97519830580222		Putative exo-1,3-beta-glucanase; predicted GPI-anchor	C1_02630C	EXG2	GPI-anchored cell wall protein, similar to S. cerevisiae exo-1,3-beta-glucosidase Exg2p; predicted Kex2p substrate; induced during cell wall regeneration; possibly an essential gene, disruptants not obtained by UAU1 method; Hap43p-repressed	YDR261C	EXG2	glucan exo-1,3-beta-glucosidase	Endochitinase; required for cell separation after mitosis; transcriptional activation during the G1 phase of the cell cycle is mediated by transcription factor Ace2p
	CAGL0C04213g	2.11399585053338		Ortholog(s) have role in chitin localization, vesicle-mediated transport and integral component of endoplasmic reticulum membrane localization	C2_08830W		Ortholog(s) have role in chitin localization, vesicle-mediated transport and integral component of endoplasmic reticulum membrane localization	YBR005W	RCR1	SSH6	Mucin family member involved in various signaling pathways; functions as osmosensor in the Sho1p-mediated HOG pathway; functions in Cdc42p- and MAP kinase-dependent filamentous growth signaling pathway; processed into secreted and cell-associated forms by aspartyl protease Yps1p; potential Cdc28p substrate
	CAGL0M09779g	2.1357010296714	CTS1	Putative endochitinase with a predicted role in cell separation	CR_10110W	CHT3	Major chitinase; secreted; functional homolog of S. cerevisiae Cts1p; 4 N-glycosylation motifs; possible O-mannosylation; putative signal peptide; hyphal-repressed; farnesol upregulated in biofilm; regulated by Efg1p, Cyr1p, Ras1p	YLR286C	CTS1	SCW2	Sporulation-specific enzyme required for spore wall maturation; involved in the production of a soluble LL-dityrosine-containing precursor of the spore wall; transcripts accumulate at the time of prospore enclosure
	CAGL0F02651g	2.15310562239446		Ortholog(s) have catalytic activity and role in ascospore wall assembly	CR_04640W	DIT1	Ortholog(s) have catalytic activity and role in ascospore wall assembly	YDR403W	DIT1		Mannose-containing glycoprotein constituent of the cell wall; member of the PIR (proteins with internal repeats) family
	CAGL0D02530g	2.40801958912585	EGT2	Putative endoglucanase; glycoside hydrolase; predicted GPI-anchor							Covalently-bound cell wall protein of unknown function; identified as a cell cycle regulated SBF target gene; deletion mutants are highly resistant to treatment with beta-1,3-glucanase; has sequence similarity to YJL171C
	CAGL0I06160g	2.41890249599477	PIR4	Pir protein family member, putative cell wall component				YJL158C	CIS3	SCW8|CCW5|PIR4|CCW11	Chitin transglycosylase; functions in the transfer of chitin to beta(1-6) and beta(1-3) glucans in the cell wall; similar and functionally redundant to Utr2; localizes to sites of polarized growth; expression induced by cell wall stress
	CAGL0I06204g	2.48253634957234	PIR1	Pir protein family member, putative cell wall component				YJL160C	YJL160C	beta-1,3-glucan linked protein
	CAGL0M05599g	2.60562129997973		Ortholog(s) have cell surface, endoplasmic reticulum, extracellular region, fungal-type vacuole, hyphal cell wall localization	C3_01550C	TOS1	Protein similar to alpha agglutinin anchor subunit; secreted; exogenously expressed protein is a substrate for Kex2 processing in vitro; fluconazole-induced; induced by alpha pheromone in SpiderM medium; Hap43-induced	YBR162C	TOS1		Cell wall protein with similarity to glucanases; may play a role in conjugation during mating based on its regulation by Ste12p
	CAGL0G09449g	2.71356934729142	CRH1	Putative glycoside hydrolase; predicted GPI-anchor	C4_02900C	CRH11	GPI-anchored cell wall transglycosylase, putative ortholog of S. cerevisiae Crh1p; predicted glycosyl hydrolase domain; similar to Csf4p and to antigenic A. fumigatus Aspf9; predicted Kex2p substrate; caspofungin-induced	YGR189C	CRH1	transglycosylase
	CAGL0A01474g	3.29138905350776		Ortholog(s) have cell surface, extracellular region, fungal-type cell wall localization	C5_04110W	SCW11	Cell wall protein; repressed in ace2 mutant; repressed in core caspofungin response; induced in high iron; possibly an essential gene, disruptants not obtained by UAU1 method; rat catheter and Spider biofilm repressed	YGL028C	SCW11	putative glucan endo-1,3-beta-D-glucosidase	Nuclear protein that negatively regulates pseudohyphal differentiation; plays a regulatory role in the cyclic AMP (cAMP)-dependent protein kinase (PKA) signal transduction pathway; relocalizes to the cytosol in response to hypoxia; SOK2 has a paralog, PHD1, that arose from the whole genome duplication
Adhesion and biofilm formation	CAGL0M07634g	-7.69192206326509	EFG1	Ortholog(s) have sequence-specific DNA binding, transcription factor activity, sequence-specific DNA binding activity	CR_07890W	EFG1	bHLH transcription factor; required for white-phase cell type, RPMI and Spider biofilm formation, hyphal growth, cell-wall gene regulation; roles in adhesion, virulence; Cph1 and Efg1 have role in host cytokine response; binds E-box	YMR016C	SOK2
	CAGL0I10340g	-4.95165818006353	PWP5	Cell wall adhesin; predicted GPI anchor; contains tandem repeats; belongs to adhesin cluster II
	CAGL0H10626g	-3.50442631934604	AWP13	Predicted cell wall adhesin with a role in adhesion; belongs to adhesin cluster III; predicted GPI anchor; contains tandem repeats							Transcription factor targeting filamentation genes and Ty1 expression; Ste12p activation of most filamentation gene promoters depends on Tec1p and Tec1p transcriptional activity is dependent on its association with Ste12p; binds to TCS elements upstream of filamentation genes, which are regulated by Tec1p/Ste12p/Dig1p complex; competes with Dig2p for binding to Ste12p/Dig1p; positive regulator of…
	CAGL0K13002g	-3.18901904965942	AED2	Putative adhesin; predicted GPI-anchor; belongs to adhesin cluster III							Phosphatidylglycerol phospholipase C; regulates phosphatidylglycerol (PG) accumulation via a phospholipase C-type degradation mechanism; PG levels affect mitochondrial function; contains glycerophosphodiester phosphodiesterase motifs
	CAGL0L00583g	-2.70778845081917	BCR1	Ortholog(s) have sequence-specific DNA binding, transcription factor activity, sequence-specific DNA binding activity	CR_06440C	BCR1	Transcription factor; regulates a/alpha biofilm formation, matrix, cell-surface-associated genes; confers adherence, impermeability, impenetrability, fluconazole resistance; Tup1/Tec1/Mnl1-regulated; mRNA binds She3; Spider biofilm induced	YPL230W	USV1	NSF1	Citrate synthase, peroxisomal isozyme involved in glyoxylate cycle; catalyzes condensation of acetyl coenzyme A and oxaloacetate to form citrate; expression is controlled by Rtg1p and Rtg2p transcription factors; SCF-Ucc1 regulates level of Cit2p to maintain citrate homeostasis; oxaloacetate-dependent positive feedback loop inhibits Cit2p ubiquitination; CIT2 has a paralog, CIT1, that arose from …
	CAGL0M01716g	-2.55704971559285	TEC1	Ortholog(s) have RNA polymerase II core promoter proximal region sequence-specific DNA binding, transcription factor activity and RNA polymerase II transcription factor recruiting, more	C3_04530C	TEC1	TEA/ATTS transcription factor; white cell pheromone response, hyphal gene regulation; required for Spider and RPMI biofilm formation; regulates BCR1; Cph2 regulated transcript; alkaline, rat catheter, Spider, flow model biofilm induced	YBR083W	TEC1	ROC1	Carnitine acetyl-CoA transferase; present in both mitochondria and peroxisomes; transfers activated acetyl groups to carnitine to form acetylcarnitine which can be shuttled across membranes
	CAGL0E05654g	-2.51292155304928		Ortholog(s) have phosphatidylglycerol phospholipase C activity, role in cell-abiotic substrate adhesion, phosphatidylglycerol catabolic process and lipid particle, mitochondrion localization	C6_02420W		Putative phosphatidyl glycerol phospholipase C; Plc1-regulated; flow model biofilm induced; Spider biofilm induced	YPL206C	PGC1	phosphatidylglycerol phospholipase
	CAGL0J11836g	-2.42834865021925		Ortholog(s) have carnitine O-acetyltransferase activity	C4_02020W	CAT2	Major carnitine acetyl transferase; intracellular acetyl-CoA transport; localized in peroxisomes and mitochondria; induced in macrophages; Hog1-repressed; stationary phase enriched; farnesol-upregulated in biofilm; Spider biofilm induced	YML042W	CAT2	carnitine O-acetyltransferase CAT2|YCAT
	CAGL0I10147g	-2.23216798951584	PWP1	Protein with 32 tandem repeats; putative adhesin-like protein; belongs to adhesin cluster II							Putative protein of unknown function; proposed to be involved in iron or copper homeostasis; the authentic, non-tagged protein is detected in highly purified mitochondria in high-throughput studies
	CAGL0J02508g	-2.17395211370266	AWP1	Adhesin-like protein; identified in cell wall extracts by mass spectrometry; belongs to adhesin cluster VI; predicted GPI anchor
	CAGL0K13024g	-2.10031732958513	AED1	Adhesin-like protein required for adherence to endothelial cells; identified in cell wall extracts by mass spectrometry; belongs to adhesin cluster III; predicted GPI anchor; 6 tandem repeats; expressed more in stationary growth phase							Mitochondrial membrane protein; not required for respiratory growth but causes a synthetic respiratory defect in combination with rmd9 mutations; transcriptionally up-regulated by TOR; deletion increases life span; YBR238C has a paralog, RMD9, that arose from the whole genome duplication
	CAGL0I10200g	-1.99098892461984	PWP3	Protein with tandem repeats; putative adhesin-like protein; belongs to adhesin cluster II							Cell wall protein related to glucanases; possibly involved in cell wall septation; member of the SUN family; SUN4 has a paralog, SIM1, that arose from the whole genome duplication
	CAGL0J11990g	-1.98002130240823	AWP4	Putative adhesin-like protein with internal repeats; identified in cell wall extracts by mass spectrometry; ORF appears artificially broken into fragments due to sequencing errors; belongs to adhesin cluster V; predicted GPI anchor							Protein involved in spore wall assembly; shares similarity with Lds1p and Lds2p and a strain mutant for all 3 genes exhibits reduced dityrosine fluorescence relative to the single mutants; identified in a screen for mutants with increased levels of rDNA transcription; green fluorescent protein (GFP)-fusion protein localizes to lipid particles; protein abundance increases in response to DNA replic…
	CAGL0H07469g	-1.79032479026109		Putative adhesin-like protein				YBR157C	ICS2
	CAGL0K07007g	-1.74911589993993		Ortholog(s) have mRNA binding activity and role in aerobic respiration, filamentous growth of a population of unicellular organisms in response to neutral pH, single-species biofilm formation on inanimate substrate	C3_06700C		Putative mitochondrial protein with a predicted role in respiratory growth; fluconazole-induced; ketoconazole-repressed; mutants display a strong defect in flow model biofilm formation; Spider biofilm induced	YBR238C	YBR238C
	CAGL0H08844g	-1.71341739761272		Putative adhesin-like protein	C2_09220W	DDR48	Immunogenic stress-associated protein; filamentation regulated; induced by benomyl/caspofungin/ketoconazole or in azole-resistant strain; Hog1, farnesol, alkaline repressed; stationary phase enriched; Spider, flow model biofilm induced	YMR173W	DDR48	DNA damage-responsive protein 48|FSP	Nitric oxide oxidoreductase; flavohemoglobin that plays role in oxidative and nitrosative stress responses; protects against nitration of cellular targets and against cell growth inhibition under aerobic or anaerobic conditions; yeast flavohemoglobin Yhb1p and human homolog neuroglobin NGB protect cells against alpha-synuclein cytotoxicity and aggregate formation; protein increases in abundance, …
	CAGL0C00847g	-1.69877493016748	EPA8	Putative adhesin-like protein; belongs to adhesin cluster I
	CAGL0G04125g	-1.69496422042207		Protein with similarity to S. cerevisiae Sag1 agglutinin, involved in cell adhesion; predicted GPI-anchor
	CAGL0J02530g	-1.68889030705827		Putative adhesion protein; predicted GPI-anchor; belongs to adhesin cluster VI
	CAGL0D06226g	-1.55292504551496		Putative adhesin-like protein
	CAGL0E00275g	-1.55149241099966	EPA20	Putative adhesin; belongs to adhesin cluster I							Putative protein of unknown function; not required for growth of cells lacking the mitochondrial genome; SWAT-GFP and mCherry fusion proteins localize to the mitochondria; YKL133C has a paralog, MGR3, that arose from the whole genome duplication
	CAGL0M00132g	-1.48709624379902	EPA12	Putative adhesin-like cell wall protein; belongs to adhesin cluster I
	CAGL0J11891g	-1.45009415609605	AWP3	Putative adhesin-like protein; identified in cell wall extracts by mass spectrometry; belongs to adhesin cluster VI							Major stress-induced structural GPI-cell wall glycoprotein; associates with translating ribosomes, possible role in mitochondrial genome maintenance; ORF contains two distinct variable minisatellites; SED1 has a paralog, SPI1, that arose from the whole genome duplication
	CAGL0K10164g	-1.34509587526958		Predicted GPI-linked protein; putative adhesin-like protein				YDR077W	SED1		Non-essential small GTPase of the Rho/Rac family of Ras-like proteins; RAC1 ortholog; regulated by phosphorylation and ubiquitination; likely involved in protein kinase C (Pkc1p)-dependent signal transduction pathway that controls cell integrity
	CAGL0M04807g	-1.2926503292249	SNF2	Component of the chromatin remodelling Swi/Snf complex; involved in regulation of biofilm formation	C2_02100W	SNF2	Protein involved in transcriptional regulation; ortholog of S. cerevisiae Snf2p, which is the catalytic subunit of the SWI/SNF chromatin remodeling complex; interacts with Swi1p; SWI/SNF complex is essential for hyphal growth and virulence	YOR290C	SNF2	SWI/SNF catalytic subunit SNF2|TYE3|SWI2|HAF1|GAM1	Protein involved in regulation of mitotic exit; dephosphorylation target of Cdc14p in anaphase, which promotes timely rDNA segregation and allows mitotic progression; interacts with Csm1p, Lrs4p; required for rDNA repeat stability; null mutant causes increase in unequal sister-chromatid exchange; GFP-fusion protein localizes to the nuclear periphery, possible Cdc28p substrate
	CAGL0J09922g	-1.2607373924897		Ortholog(s) have glucan endo-1,3-beta-D-glucosidase activity	C6_00820W	SUN41	Cell wall glycosidase; role in biofilm formation and cell separation; possibly secreted; hypoxia, hyphal induced; caspofungin repressed; Efg1, Cph1 regulated; O-glycosylated, possible Kex2 substrate; 5'-UTR intron; Spider biofilm induced	YNL066W	SUN4	putative glucosidase SUN4|SCW3
	CAGL0A01284g	-1.2533480803279	EPA10	Putative adhesin-like protein; belongs to adhesin cluster I
	CAGL0E00231g	-1.17793633998759		Putative adhesin-like protein; contains tandem repeats and a predicted GPI-anchor; belongs to adhesin cluster III
	CAGL0L10092g	-1.14680067315329		Putative adhesin-like cell wall protein; multiple tandem repeats; predicted GPI-anchor; belongs to adhesin cluster III							GPI lipid remodelase; responsible for introducing ceramides into GPI anchors having a C26:0 fatty acid in sn-2 of the glycerol moiety; can also use lyso-GPI protein anchors and various base resistant lipids as substrates; contains 14-16 transmembrane segments and several putative glycosylation and phosphorylation sites; null mutation is synthetically lethal with pkc1 deletion
	CAGL0C00253g	-1.13132639982146		Putative cell wall adhesin; belongs to adhesin cluster III; predicted GPI anchor; contains 6 tandem repeats							Mucin family member that functions as an osmosensor in the HOG pathway; large, highly glycosylated protein that functions redundantly with Msb2p in Sho1p-mediated osmostresss induction of the HOG signaling pathway; cytoplasmic domain interacts with Ahk1p a scaffold protein that prevents cross talk with the Kss1p MAPK of the filamentous growth pathway; mutant displays defects in beta-1,3 glucan sy…
	CAGL0A01366g	-1.04918897055953	EPA9	Putative adhesin; belongs to adhesin cluster I							Subunit of the SWI/SNF chromatin remodeling complex; involved in transcriptional regulation; functions interdependently in transcriptional activation with Snf2p and Snf6p; relocates to the cytosol under hypoxic conditions
	CAGL0C00968g	-1.03624430373938		Adhesin-like protein with a predicted role in cell adhesion; belongs to adhesin cluster VII; predicted GPI-anchor							Phosphomannomutase; involved in synthesis of GDP-mannose and dolichol-phosphate-mannose; required for folding and glycosylation of secretory proteins in the ER lumen
	CAGL0I00220g	1.00137526925925	EPA23	Predicted GPI-linked adhesin-like protein; belongs to adhesin cluster I
	CAGL0L02123g	1.25381474786273	SNF5	Ortholog(s) have DNA translocase activity, RNA polymerase II activating transcription factor binding activity	C3_04290C	SNF5	SWI/SNF chromatin remodeling complex subunit involved in transcriptional regulation; mutants have defects in silicone adherence, biofilm formation, hyphal morphogenesis, cell wall defects; increased cell aggregation during yeast form growth	YBR289W	SNF5	TYE4|SWI10|HAF4	Transcription factor required for septum destruction after cytokinesis; phosphorylation by Cbk1p blocks nuclear exit during M/G1 transition, causing localization to daughter cell nuclei, and also increases Ace2p activity; phosphorylation by Cdc28p and Pho85p prevents nuclear import during cell cycle phases other than cytokinesis; part of RAM network that regulates cellular polarity and morphogene…
	CAGL0K12848g	1.40994680477535	SEC53	Putative phosphomannomutase; protein differentially expressed in azole resistant strain	C1_02480W	PMM1	Phosphomannomutase; enzyme of O- and N-linked mannosylation; interconverts mannose-6-phosphate and mannose-l-phosphate; functional homolog of S. cerevisiae Sec53; antigenic in mice; Hap43-induced; flow model and Spider biofilm repressed	YFL045C	SEC53	phosphomannomutase SEC53|ALG4
	CAGL0M04323g	1.52227724606992	ACE2	Putative transcription factor; null mutation results in hypervirulence in immunocompromised mice	CR_07440W	ACE2	Transcription factor; similar to S. cerevisiae Ace2 and Swi5; regulates morphogenesis, cell separation, adherence, virulence in a mice; mutant is hyperfilamentous; rat catheter and Spider biofilm induced	YLR131C	ACE2	DNA-binding transcription factor ACE2	Transcription coactivator; component of the ADA and SAGA transcriptional adaptor/HAT (histone acetyltransferase) complexes
	CAGL0E06688g	1.67619471966665	EPA3	Epithelial adhesion protein; belongs to adhesin cluster I; GPI-anchored							Anillin-like protein involved in bud-site selection; required for the axial budding pattern; required for the formation and disassembly of the double septin ring structure, and generally for septin organization; functions as a platform linking the cytokinesis tag septins to the axial landmark through its multiple domains; in vivo substrate of Cdc28p/Clb2p
	CAGL0K06193g	1.78704711498853		Ortholog(s) have chromatin binding, histone acetyltransferase activity, phosphatidylserine binding, sequence-specific DNA binding, transcription coactivator activity	C1_10860C	ADA2	Zinc finger and homeodomain transcriptional coactivator; role in cell wall integrity and in sensitivity to caspofungin; required for the normal transcriptional response to caspofungin; required for yeast cell adherence to silicone substrate	YDR448W	ADA2	chromatin-binding transcription regulator ADA2|SWI8	Major exo-1,3-beta-glucanase of the cell wall; involved in cell wall beta-glucan assembly; exists as three differentially glycosylated isoenzymes; EXG1 has a paralog, SPR1, that arose from the whole genome duplication
	CAGL0M03773g	1.96076661719676		Predicted GPI-linked adhesin-like protein				YNL300W	TOS6		Protein of the ER membrane involved in cell wall chitin deposition; may function in the endosomal-vacuolar trafficking pathway, helping determine whether plasma membrane proteins are degraded or routed to the plasma membrane; RCR1 has a paralog, RCR2, that arose from the whole genome duplication
	CAGL0M09086g	1.96112907693473		Ortholog(s) have GTP binding, cell adhesion molecule binding activity	C5_02470W	INT1	Protein structurally similar to alpha-subunit of human leukocyte integrin; role in morphogenesis, adhesion, and mouse cecal colonization and systemic virulence; similar to S. cerevisiae Bud4; Hap43-induced gene	YJR092W	BUD4
	CAGL0I00484g	2.0817645662909		Ortholog(s) have cell adhesion molecule binding, glucan endo-1,6-beta-glucosidase activity, glucan exo-1,3-beta-glucosidase activity	C1_02990C	XOG1	Exo-1,3-beta-glucanase; 5 glycosyl hydrolase family member; affects sensitivity to chitin and glucan synthesis inhibitors; not required for yeast-to-hypha transition or for virulence in mice; Hap43-induced; Spider biofilm induced	YLR300W	EXG1	glucan 1,3-beta-glucosidase|SCW6|BGL1	HSP70 family ATP-binding protein; involved in protein folding, vacuolar import of proteins; required for ubiquitin-dependent degradation of short-lived proteins; associated with chaperonin-containing T-complex; 98% identical to paralog Ssa1p with distinct functional specificity in propagation of yeast [URE3] prions and vacuolar-mediated degradation of gluconeogenesis enzymes; binds tRNA, has role…
	CAGL0F08833g	2.15278560682342		Putative adhesin-like protein	C2_01780W	MSB2	Mucin family adhesin-like protein; cell wall damage sensor; required for Cek1 phosphorylation by cell wall stress; Rim101-repressed; activation releases extracellular domain into medium; Spider biofilm induced	YGR014W	MSB2
	CAGL0E06644g	2.21876732889877	EPA1	Sub-telomerically encoded adhesin with a role in cell adhesion; GPI-anchored cell wall protein; N-terminal ligand binding domain binds to ligands containing a terminal galactose residue; belongs to adhesin cluster I							Cell wall protein with similarity to glucanases; may play a role in conjugation during mating based on mutant phenotype and its regulation by Ste12p; SWC10 has a paralog, SCW4, that arose from the whole genome duplication
	CAGL0G03795g	2.22218378761045	SSA1	Heat shock protein of the HSP70 family	C1_04300C	SSA2	HSP70 family chaperone; cell wall fractions; antigenic; beta-defensin peptides impport; ATPase domain binds histatin 5; at hyphal surface, not yeast; farnesol-repressed in biofilm; flow model, Spider biofilm repressed; caspofungin repressed	YLL024C	SSA2	Hsp70 family chaperone SSA2|YG102
	CAGL0M13805g	2.54775233124425	MP65	65 kDa mannoprotein	C2_10030C	MP65	Cell surface mannoprotein; cell-wall glucan metabolism, adhesion; adhesin motif; O-glycosylation; induced by heat, germ tube formation, wall regeneration; mycelial antigen; diagnostic marker; fluconazole-repressed; Spider biofilm induced	YMR305C	SCW10	putative family 17 glucosidase	Mannoprotein that exhibits a tight association with the cell wall; required for cell wall stability in the absence of GPI-anchored mannoproteins; has a high serine-threonine content; expression is induced in cell wall mutants; SRL1 has a paralog, SVS1, that arose from the whole genome duplication
	CAGL0E02915g	2.6492923390283		Putative adhesin-like protein							Transcriptional repressor; mediates glucose repression and negatively regulates filamentous growth; activated in stochastic pulses of nuclear localization in response to low glucose
	CAGL0K09130g	2.65396070553409		Putative adhesin-like protein				YOR247W	SRL1		Daughter cell-specific secreted protein with similarity to glucanases; degrades cell wall from the daughter side causing daughter to separate from mother; expression is repressed by cAMP
	CAGL0L07480g	2.71453973117198		Ortholog(s) have double-stranded DNA binding, sequence-specific DNA binding, transcription factor activity, sequence-specific DNA binding activity	C7_04230W	NRG1	Transcription factor/repressor; regulates chlamydospore formation/hyphal gene induction/virulence and rescue/stress response genes; effects both Tup1 dependent and independent regulation; flow model biofilm induced; Spider biofilm repressed	YBR066C	NRG2		Daughter cell-specific protein; may regulate cross-talk between the mating and filamentation pathways; deletion affects cell separation after division and sensitivity to alpha-factor and drugs affecting the cell wall; relocalizes from bud neck to cytoplasm upon DNA replication stress
	CAGL0G05896g	2.81340723144852		Putative adhesin-like protein				YHR143W	DSE2
	CAGL0K02277g	2.91387451979986		Ortholog(s) have role in cell adhesion involved in single-species biofilm formation, cell separation after cytokinesis, cell wall organization and cellular response to glucose starvation, more	C2_08490W	DSE1	Essential cell wall protein involved in cell wall integrity and rigidity; periodic mRNA expression peaks at M/G1 phase; Ace2p-induced; required for virulence in a mouse model of infection	YER124C	DSE1		Protein similar to heat shock transcription factor; multicopy suppressor of pseudohyphal growth defects of ammonium permease mutants
Invasive/Filamentous growth	CAGL0F08195g	-2.92228860968816		Ortholog(s) have sequence-specific DNA binding, transcription factor activity, sequence-specific DNA binding activity	C5_04830W	SFL2	Transcription factor involved in regulation of morphogenesis; required for filamentous growth, for virulence in RHE model but not in mice; induced upon RHE infection but C. dubliniensis ortholog is not; Spider biofilm induced	YGR249W	MGA1		Homeodomain-containing protein and putative transcription factor; found associated with chromatin; target of SBF transcription factor; induced during meiosis and under cell-damaging conditions; TOS8 has a paralog, CUP9, that arose from the whole genome duplication
	CAGL0F04807g	-1.95045029259421		Ortholog(s) have role in pathogenesis and cell surface, hyphal cell wall, integral component of mitochondrial outer membrane, plasma membrane localization	CR_01470W	CSP37	Hyphal cell wall protein; role in progression of mouse systemic infection; predicted P-loop, divalent cation binding, N-glycosylation sites; expressed in yeast and hyphae; hyphal downregulated; stationary-phase enriched; GlcNAc-induced	YIL136W	OM45		bHLH protein with similarity to myc-family transcription factors; overexpression confers hyperfilamentous growth and suppresses the pseudohyphal filamentation defect of a diploid mep1 mep2 homozygous null mutant
	CAGL0H02959g	-1.81467140321516	TOS8	Ortholog(s) have chromatin binding, sequence-specific DNA binding activity, role in filamentous growth and nuclear chromatin localization	C7_02040C	CUP9	Transcription factor; represses SOK1 expression in response to farnesol inhibition; yeast-hypha switch repressed; ketoconazole-induced; Plc1-regulated; colony morphology-related Ssn6 regulation; Spider, flow model biofilm induced	YGL096W	TOS8		Carnitine acetyltransferase; has similarity to Yat1p, which is a carnitine acetyltransferase associated with the mitochondrial outer membrane
	CAGL0E03762g	-1.41692393526771		Ortholog(s) have sequence-specific DNA binding, transcriptional repressor activity, RNA polymerase II core promoter proximal region sequence-specific binding activity	C1_14340C	RIM101	Transcription factor; alkaline pH response; required for alkaline-induced hyphal growth; role in virulence in mice; activated by C-terminal proteolytic cleavage; mediates both positive and negative regulation; Spider biofilm induced	YHL027W	RIM101	alkaline-responsive transcriptional regulator RIM101|RIM1	hEST1A/B (SMG5/6)-like protein; contributes to environment-sensing adaptive gene expression responses; Esl1p and Esl2p contain a 14-3-3-like domain and a putative PilT N-terminus ribonuclease domain; ESL1 has a paralog, ESL2, that arose from the whole genome duplication
	CAGL0H05687g	-1.26736240805386		Ortholog(s) have sulfite transmembrane transporter activity	CR_09170C	SSU1	Protein similar to S. cerevisiae Ssu1 sulfite transport protein; Tn mutation affects filamentous growth; regulated by Gcn2 and Gcn4; induced by nitric oxide; Hap43-repressed; Spider and flow model biofilm induced	YPL092W	SSU1	LPG16	Cell wall mannoprotein; member of Srp1p/Tip1p family of serine-alanine-rich proteins; expressed under anaerobic conditions and required for anaerobic growth; TIR3 has a paralog, TIR2, that arose from the whole genome duplication
	CAGL0H08107g	-1.17975074164279		Ortholog(s) have double-stranded DNA binding, transcription factor activity, sequence-specific DNA binding activity	C6_00280W	CPH2	Myc-bHLH transcription factor; promotes hyphal growth; directly regulates Tec1 to induce hypha-specific genes; probably homodimeric, phosphorylated; required for colonization of the mouse GI tract; rat catheter and Spider biofilm induced	YOR032C	HMS1		Member of an oxysterol-binding protein family; this family has seven members in S. cerevisiae; family members have overlapping, redundant functions in sterol metabolism and collectively perform a function essential for viability; contains FFAT motif; interacts with ER anchor Scs2p at patches at the plasma membrane; regulated by sterol binding
	CAGL0I08305g	-1.11405737503541		Ortholog(s) have carnitine O-acetyltransferase activity	C3_04000C	CTN3	Peroxisomal carnitine acetyl transferase; no obvious metabolic, hyphal, virulence defects in Ura+ strain; induced by macrophage engulfment, hyphal growth, starvation, nonfermentable carbon sources; rat catheter, Spider biofilm induced	YER024W	YAT2	carnitine O-acetyltransferase YAT2	Telomere end-binding and capping protein; plays a key role with Pol12p in linking telomerase action with completion of lagging strand synthesis, and in a regulatory step required for telomere capping; similar to human Stn1
	CAGL0J10780g	1.28234392484139		Ortholog(s) have lipid binding, sterol transporter activity	C4_03590C	OSH3	Protein required for wild-type filamentation; has oxysterol binding protein domain and pleckstrin homology motif; overproducton suppresses cph1 homozygous null filamnetation defect; similar to S. cerevisiae Osh3p	YHR073W	OSH3	oxysterol-binding protein related protein OSH3	Component of the Rpd3L histone deacetylase complex; zinc-finger inhibitor of HO transcription; mRNA is localized and translated in the distal tip of anaphase cells, resulting in accumulation of Ash1p in daughter cell nuclei and inhibition of HO expression; potential Cdc28p substrate
	CAGL0K10032g	1.32141916455806		Ortholog(s) have single-stranded telomeric DNA binding activity, role in filamentous growth, negative regulation of telomere maintenance via telomerase, telomere capping and CST complex localization	C2_08470C	STN1	Protein involved in telomere maintenance; forms a complex with Ten1p	YDR082W	STN1		Copper-sensing transcription factor; involved in regulation of genes required for high affinity copper transport; required for regulation of yeast copper genes in response to DNA-damaging agents; undergoes changes in redox state in response to changing levels of copper or MMS
	CAGL0D00462g	1.44007573169397		Ortholog(s) have core promoter proximal region sequence-specific DNA binding, transcriptional repressor activity, RNA polymerase II core promoter proximal region sequence-specific binding activity	C2_10660W	ASH1	GATA-like transcription factor; localizes to daughter cell, hyphal tip cell nuclei; mRNA localization mediated by She3; required for WT virulence and filamentous growth on solid media; Ras1 repressed in yeast, Cyr1 repressed yeast, hyphae	YKL185W	ASH1	DNA-binding transcription repressor ASH1	Subunit of the HIR complex; a nucleosome assembly complex involved in regulation of histone gene transcription; involved in position-dependent gene silencing and nucleosome reassembly; ortholog of human CABIN1 protein
	CAGL0M07590g	1.54693967235111		Ortholog(s) have core promoter proximal region DNA binding, transcriptional activator activity, RNA polymerase II core promoter proximal region sequence-specific binding activity	C7_00510W	MAC1	Copper fist transcription factor; regulator of CTR1 copper transporter; induces CTR1 in low-copper conditions; required for copper regulation of SOD1 and SOD3; Spider biofilm induced	YMR021C	MAC1	CUA1	Protein of unknown function that interacts with Msb2p; may play a role in activation of the filamentous growth pathway
	CAGL0M00286g	1.61382602655188	HIR3	Ortholog(s) have DNA binding, nucleosome binding, transcription corepressor activity	C3_07680W		Putative nucleosome assembly protein; homozygous transposon insertion causes decreased colony wrinkling under filamentous growth-inducing conditions, but does not block true hyphal formation in liquid media	YJR140C	HIR3	HPC1	Protein integral to the mitochondrial membrane; has a conserved methyltransferase motif and is predicted to be an RNA methyltransferase; multicopy suppressor of respiratory defects caused by OXA1 mutations
	CAGL0H07227g	1.78235620879548		Ortholog(s) have role in filamentous growth and mitochondrial envelope localization	C4_03780C		Putative mitochondrial membrane protein; homozygous transposon insertion causes decreased colony wrinkling under filamentous growth-inducing conditions, but does not block true hyphal formation in liquid media	YDR316W	OMS1	putative RNA methyltransferase	Mitochondrial C1-tetrahydrofolate synthase; involved in interconversion between different oxidation states of tetrahydrofolate (THF); provides activities of formyl-THF synthetase, methenyl-THF cyclohydrolase, and methylene-THF dehydrogenase
Co-factor and vitamin metabolic process	CAGL0M01694g	-1.55756875562088		Ortholog(s) have formate-tetrahydrofolate ligase activity, methenyltetrahydrofolate cyclohydrolase activity, methylenetetrahydrofolate dehydrogenase (NADP+) activity	CR_07010W	MIS11	Predicted mitochondrial C1-tetrahydrofolate synthase precursor; putative protein of glycine catabolism; repressed by Efg1; fluconazole-induced; stationary phase enriched protein; rat catheter and Spider biofilm repressed	YBR084W	MIS1	trifunctional formate-tetrahydrofolate ligase/methenyltetrahydrofolate cyclohydrolase/methylenetetrahydrofolate dehydrogenase MIS1	Plasma membrane riboflavin transporter; facilitates the uptake of vitamin B2; required for FAD-dependent processes; sequence similarity to mammalian monocarboxylate permeases, however mutants are not deficient in monocarboxylate transport
	CAGL0M06721g	-1.52573681625105		Ortholog(s) have phosphopantothenate--cysteine ligase activity, role in acetyl-CoA biosynthetic process from pantothenate, coenzyme A biosynthetic process and cytosol, nucleus localization							GTP cyclohydrolase II; catalyzes the first step of the riboflavin biosynthesis pathway
	CAGL0M14113g	-1.32902298059814	TNR2	High-affinity transporter of NAD+ precursors; strongly induced under niacin-limiting conditions
	CAGL0I09702g	-1.26208665568252		Ortholog(s) have riboflavin transporter activity, role in riboflavin transport and plasma membrane localization				YOR306C	MCH5		Conserved NADPH oxidoreductase containing flavin mononucleotide (FMN); responsible for geraniol reduction into citronellol during fermentation; homologous to Oye3p with different ligand binding and catalytic properties; may be involved in sterol metabolism, oxidative stress response, and programmed cell death; protein abundance increases in response to DNA replication stress
	CAGL0F04279g	-1.16450766911092		Ortholog(s) have cyclohydrolase activity, role in riboflavin biosynthetic process and cytosol, nucleus localization	CR_02990C	RIB1	Putative GTP cyclohydrolase II; enzyme of riboflavin biosynthesis; fungal-specific (no human or murine homolog); regulated by Sef1p-, Sfu1p-, and Hap43p	YBL033C	RIB1	GTP cyclohydrolase II	Ketopantoate hydroxymethyltransferase; required for pantothenic acid biosynthesis, converts 2-oxoisovalerate into 2-dehydropantoate
	CAGL0I02574g	-1.04496304529986		Ortholog(s) have NADPH dehydrogenase activity, role in apoptotic process and cytosol, mitochondrion, nucleus localization	C6_01410C	OYE2	Putative NAPDH dehydrogenase; induced by nitric oxide; Spider biofilm induced	YHR179W	OYE2	NADPH dehydrogenase	Thiamine pyrophosphokinase; phosphorylates thiamine to produce the coenzyme thiamine pyrophosphate (thiamine diphosphate)
	CAGL0M06215g	-1.0013376935696		Ortholog(s) have 3-methyl-2-oxobutanoate hydroxymethyltransferase activity, role in pantothenate biosynthetic process, respiratory chain complex IV assembly and mitochondrion localization	C1_00510W		Ortholog(s) have 3-methyl-2-oxobutanoate hydroxymethyltransferase activity, role in pantothenate biosynthetic process, respiratory chain complex IV assembly and mitochondrion localization	YBR176W	ECM31	3-methyl-2-oxobutanoate hydroxymethyltransferase	Pantothenate synthase; also known as pantoate-beta-alanine ligase, required for pantothenic acid biosynthesis, deletion causes pantothenic acid auxotrophy, homologous to E. coli panC
	CAGL0I07117g	1.21342372716294		Ortholog(s) have thiamine diphosphokinase activity, role in thiamine diphosphate biosynthetic process and cytoplasm localization	C5_03840W		Thiamine pyrophosphokinase, phosphorylates thiamine to produce the coenzyme thiamine pyrophosphate (thiamine diphosphate); active as a homodimer	YOR143C	THI80	thiamine diphosphokinase
	CAGL0H06523g	1.22220838239691		Ortholog(s) have pantoate-beta-alanine ligase activity, role in pantothenate biosynthetic process and cytosol, nucleus localization	CR_02580W	PAN6	Ortholog(s) have pantoate-beta-alanine ligase activity, role in pantothenate biosynthetic process and cytosol, nucleus localization	YIL145C	PAN6	pantoate--beta-alanine ligase PAN6	High affinity sulfate permease; sulfate uptake is mediated by specific sulfate transporters Sul1p and Sul2p, which control the concentration of endogenous activated sulfate intermediates
Ion metabolism	CAGL0L12342g	-2.43412174484834		Ortholog(s) have sulfate transmembrane transporter activity, role in sulfate transport and Golgi apparatus, plasma membrane localization				YLR092W	SUL2	sulfate permease
	CAGL0K06237g	-2.38788295280873		Ortholog(s) have endopolyphosphatase activity, exopolyphosphatase activity, role in polyphosphate catabolic process and cytosol, fungal-type vacuole membrane, nucleus localization	C7_00980W	PHM5	Ortholog(s) have endopolyphosphatase activity, exopolyphosphatase activity, role in polyphosphate catabolic process and cytosol, fungal-type vacuole membrane, nucleus localization	YDR452W	PPN1	endopolyphosphatase|PHM5	Putative transporter; localizes to the plasma membrane in response to high levels of extracellular calcium; member of the SLC10 carrier family; identified in a transposon mutagenesis screen as a gene involved in azole resistance; YMR034C is not an essential gene
	CAGL0K07337g	-2.3534534361827		Has domain(s) with predicted ion channel activity, role in ion transport and membrane localization							Component of cytosolic iron-sulfur protein assembly (CIA) machinery; acts at a late step of Fe-S cluster assembly; forms the CIA targeting complex with Cia1p and Met18p that directs Fe-S cluster incorporation into a subset of proteins involved in methionine biosynthesis, DNA replication and repair, transcription, and telomere maintenance; ortholog of human FAM96B
	CAGL0F05929g	-2.28820276095299		Ortholog(s) have role in calcium ion import and plasma membrane localization	C4_00360C	RCH1	Plasma membrane protein; involved in regulation of cytosolic calcium homeostasis; null mutation confers sensitivity to calcium and resistance to azoles and terbinafine; rat catheter biofilm induced	YMR034C	YMR034C		P-type ATPase sodium pump; involved in Na+ and Li+ efflux to allow salt tolerance
	CAGL0L13046g	-2.04940727782263		Ortholog(s) have role in iron-sulfur cluster assembly and cytosol, nucleus localization	C7_02550C		Protein of unknown function, transcript is upregulated in clinical isolates from HIV+ patients with oral candidiasis	YHR122W	CIA2	iron-sulfur cluster assembly protein CIA2	Vacuolar cation channel; mediates release of Ca(2+) from the vacuole in response to hyperosmotic shock
	CAGL0K12034g	-1.88072124759505	ENA1	Na(+)-ATPase with broad substrate specificity; plays a role in sodium detoxification; highly upregulated by increased osmotic pressure or sodium concentration				YDR040C	ENA1	Na(+)/Li(+)-exporting P-type ATPase ENA1|PMR2|HOR6	Subunit alpha of assimilatory sulfite reductase; complex converts sulfite into sulfide
	CAGL0J08613g	-1.81504491822301		Ortholog(s) have calcium activated cation channel activity, calcium channel activity, potassium channel activity, sodium channel activity, voltage-gated ion channel activity	C2_07730W	YVC1	Putative vacuolar cation channel shock; repressed by alpha pheromone in SpiderM medium; flow model biofilm repressed	YOR087W	YVC1	TRPY1|YOR088W	High-affinity inorganic phosphate (Pi) transporter; also low-affinity manganese transporter; regulated by Pho4p and Spt7p; mutation confers resistance to arsenate; exit from the ER during maturation requires Pho86p; cells overexpressing Pho84p accumulate heavy metals but do not develop symptoms of metal toxicity
	CAGL0L05786g	-1.80318981886416		Has domain(s) with predicted nucleic acid binding, zinc ion binding activity
	CAGL0D05280g	-1.71050008736574		Ortholog(s) have sulfite reductase (NADPH) activity, role in sulfate assimilation and cytosol, sulfite reductase complex (NADPH) localization	C2_09140C	MET10	Sulfite reductase; role in sulfur amino acid metabolism; induced by human whole blood or PMNs; Hog1-induced; possibly adherence-induced; flow model, Spider model, F-12/CO2 biofilm induced	YFR030W	MET10	sulfite reductase subunit alpha	Vacuolar Fe2+/Mn2+ transporter; suppresses respiratory deficit of yfh1 mutants, which lack the ortholog of mammalian frataxin, by preventing mitochondrial iron accumulation; relative distribution to the vacuole decreases upon DNA replication stress
	CAGL0B02475g	-1.60760072283595	PHO84	Ortholog(s) have inorganic phosphate transmembrane transporter activity, manganese ion transmembrane transporter activity, phosphate:proton symporter activity, selenite:proton symporter activity	C1_11480W	PHO84	High-affinity phosphate transporter; transcript regulated by white-opaque switch; Hog1, ciclopirox olamine or alkaline induced; caspofungin, stress repressed; upregulated in RHE model; Spider and flow model biofilm induced, Hap43-induced	YML123C	PHO84	phosphate transporter PHO84|phoT	High-affinity copper transporter of plasma membrane; mediates nearly all copper uptake under low copper conditions; transcriptionally induced at low copper levels and degraded at high copper levels; protein increases in abundance and relocalizes from nucleus to plasma membrane upon DNA replication stress; human homolog SLC31A1 can complement a yeast ctr1 ctr3 double deletion
	CAGL0C00693g	-1.54363453666752	CCC1	Putative vacuolar iron transporter	C3_03710W	CCC1	Manganese transporter; required for normal filamentous growth; mRNA binds She3, localized to hyphal tips; repressed by NO, alkaline pH; colony morphology-related regulation by Ssn6; regulated by Sef1, Sfu1, Hap43; Spider biofilm induced	YLR220W	CCC1		Conserved protein of the mitochondrial matrix; performs a scaffolding function during assembly of iron-sulfur clusters, interacts physically and functionally with yeast frataxin (Yfh1p); ISU1 has a paralog, ISU2, that arose from the whole genome duplication; isu1 isu2 double mutant is inviable; human homolog ISCU implicated in mitochondrial myopathy, can complement isu1 isu2 double mutant
	CAGL0D04708g	-1.51512278196131		Ortholog(s) have copper uptake transmembrane transporter activity, role in copper ion import, high-affinity iron ion transmembrane transport and cytoplasm, nucleus, plasma membrane localization	C6_00790C	CTR1	Copper transporter; transcribed in low copper; induced Mac1, Tye7, macrophage interaction, alkaline pH via Rim101; 17-beta-estradiol repressed; complements S. cerevisiae ctr1 ctr3 copper transport mutant; flow model/Spider biofilm induced	YPR124W	CTR1	high-affinity Cu transporter CTR1	Vacuolar membrane antiporter with Ca2+/H+ and K+/H+ exchange activity; involved in control of cytosolic Ca2+ and K+ concentrations; has similarity to sodium/calcium exchangers, including the bovine Na+/Ca2+,K+ antiporter
	CAGL0M02629g	-1.32092491969179		Ortholog(s) have 2 iron, 2 sulfur cluster binding, ferrous iron binding, iron-sulfur transferase activity	C7_01760C	ISU1	Protein with similarity to NifU; possible role in iron-sulfur cluster biogenesis; induced in low iron; rat catheter biofilm induced; rat catheter and Spider biofilm induced	YPL135W	ISU1	iron-binding protein ISU1|NUA1	Protein involved in Fe-S cluster transfer to mitochondrial clients; protects [4Fe-4S] clusters from damage due to oxidative stress; acts along with Bol3 at a late step in the transfer of [4Fe-4S] clusters from the ISA complex to client proteins; Fe-S loaded homodimer at steady state; similar to NifU, a bacterial protein required for Fe/S cluster maturation; ortholog of the human NFU1, mutations o…
	CAGL0J09306g	-1.32038638076585		Ortholog(s) have calcium:proton antiporter activity, potassium:proton antiporter activity and role in calcium ion transport, cellular calcium ion homeostasis, transmembrane transport	C1_08580C	VCX1	Putative H+/Ca2+ antiporter; Spider biofilm repressed	YDL128W	VCX1	MNR1|HUM1	Basic leucine zipper (bZIP) transcription factor; physically interacts with the Tup1-Cyc8 complex and recruits Tup1p to its targets; overexpression increases sodium and lithium tolerance; computational analysis suggests a role in regulation of expression of genes involved in carbohydrate metabolism; YAP6 has a paralog, CIN5, that arose from the whole genome duplication
	CAGL0L01859g	-1.24451262389266	NFU1	Protein with a predicted role in iron homeostasis	C2_00600C		Protein with a predicted role in mitochondrial iron metabolism; Hap43-repressed; expression upregulated during growth in the mouse cecum; Spider biofilm induced	YKL040C	NFU1	NUB1	Ferredoxin of the mitochondrial matrix; required for formation of cellular iron-sulfur proteins; involved in heme A biosynthesis; human homolog FDX1L can complement yeast by allowing growth during down-regulation of yeast YAH1
	CAGL0M08800g	-1.2443282612039	YAP6	bZIP domain-containing protein				YDR259C	YAP6	HAL7	Subunit of the cytosolic iron-sulfur (FeS) protein assembly machinery; required for maturation of cytosolic and nuclear FeS proteins and for normal resistance to oxidative stress; deficiency results in shortened lifespan and sensitivity to paraquat; homologous to human Narf
	CAGL0H00660g	-1.22036782803428		Ortholog(s) have oxidoreductase activity, acting on NAD(P)H, heme protein as acceptor activity, role in heme a biosynthetic process, iron-sulfur cluster assembly, ubiquinone biosynthetic process and mitochondrial matrix localization	C3_03390C	YAH1	Protein similar to oxidoreductases; induced in high iron; Hap43-repressed	YPL252C	YAH1	adrenodoxin	Membrane protein involved in zinc ion homeostasis; member of the four-protein IZH family, expression induced by zinc deficiency; deletion reduces sensitivity to elevated zinc and shortens lag phase, overexpression reduces Zap1p activity
	CAGL0J07590g	-1.16510029648945		Ortholog(s) have iron-sulfur cluster binding activity, role in iron-sulfur cluster assembly and cytosol, membrane, nucleus localization	C1_09010W	NAR1	Putative cytosolic iron-sulfur (FeS) protein assembly machinery protein; induced by nitric oxide; oxidative stress-induced via Cap1p	YNL240C	NAR1		Vacuolar membrane zinc transporter; transports zinc from storage in the vacuole to the cytoplasm when needed; transcription is induced under conditions of zinc deficiency
	CAGL0D03322g	-1.15871271786318		Ortholog(s) have role in cellular zinc ion homeostasis and endoplasmic reticulum localization	C6_03800C		Putative membrane protein with a predicted role in zinc ion homeostasis; Hap43-induced; fluconazole-induced; rat catheter and Spider biofilm induced	YLR023C	IZH3		Putative K+/H+ antiporter; has a probable role in intracellular cation homeostasis; localized to Golgi vesicles and detected in highly purified mitochondria in high-throughput studies
	CAGL0M08250g	-1.11491017524761		Ortholog(s) have zinc ion transmembrane transporter activity, role in cellular zinc ion homeostasis, zinc II ion transport and endoplasmic reticulum, fungal-type vacuole membrane localization	C2_02180W		Ortholog of S. cerevisiae Zrt3, vacuolar membrane zinc transporter; predicted Kex2 substrate; induced in oralpharyngeal candidasis; flow model biofilm induced; Spider biofilm induced	YKL175W	ZRT3	Zn(2+) transporter ZRT3	Component of the cytosolic Fe-S protein assembly (CIA) machinery; contains an Fe-S cluster that receives electrons from NADPH via the action of Tah18p in an early step in the CIA pathway; ortholog of human Ciapin1; protein abundance increases in response to DNA replication stress; inviability of the null mutant is functionally complemented by human CIAPIN1
	CAGL0L03498g	-1.07869500508441		Ortholog(s) have potassium:proton antiporter activity, role in monovalent inorganic cation transport and Golgi apparatus, endoplasmic reticulum, mitochondrion localization				YJL094C	KHA1		ARN family transporter for siderophore-iron chelates; responsible for uptake of iron bound to ferrirubin, ferrirhodin, and related siderophores; protein increases in abundance and relocalizes to the vacuole upon DNA replication stress
	CAGL0G01947g	-1.06583928755706		Ortholog(s) have 2 iron, 2 sulfur cluster binding, 4 iron, 4 sulfur cluster binding, electron carrier activity	CR_02650C	DRE2	Putative cytosolic Fe-S protein assembly protein; a-specific transcript; regulated by Sef1, Sfu1, and Hap43; rat catheter and Spider biofilm induced	YKR071C	DRE2	electron carrier DRE2	Membrane protein involved in zinc ion homeostasis; member of the four-protein IZH family; transcription is regulated directly by Zap1p, expression induced by zinc deficiency and fatty acids; deletion increases sensitivity to elevated zinc; IZH1 has a paralog, IZH4, that arose from the whole genome duplication
	CAGL0E04092g	-1.04206886164859	SIT1	Putative siderophore-iron transporter with 14 transmembrane domains; required for iron-dependent survival in macrophages; mRNA levels elevated under iron deficiency conditions; plasma membrane localized	C2_08050C	SIT1	Transporter of ferrichrome siderophores, not ferrioxamine B; required for human epithelial cell invasion in vitro, not for mouse systemic infection; regulated by iron, Sfu1, Rfg1, Tup1, Hap43; rat catheter and Spider biofilm induced	YHL040C	ARN1	siderophore transporter
	CAGL0G04631g	-1.02247212012778		Ortholog(s) have role in cellular zinc ion homeostasis and endoplasmic reticulum localization	C1_05010C		Ortholog(s) have role in cellular zinc ion homeostasis and endoplasmic reticulum localization	YDR492W	IZH1	PAQR-type receptor
	CAGL0D01265g	1.06788679932701	MT-I	Copper-binding metallothionein, involved in sequestration of metal ions; inducible by copper and silver; gene used for molecular typing of C. glabrata strain isolates							Protein involved in proteolytic activation of Rim101p; part of response to alkaline pH; PalA/AIP1/Alix family member; interaction with the ESCRT-III subunit Snf7p suggests a relationship between pH response and multivesicular body formation
	CAGL0H09878g	1.16741570303034	IPP1	Inorganic pyrophosphatase, cytoplasmic							Mitochondrial inner membrane protein with similarity to Mdm31p; required for normal mitochondrial morphology and inheritance; interacts genetically with MMM1, MDM10, MDM12, and MDM34; variation between SK1 and S288C at residues 182 and 262 impacts invasive growth and mitochondrial network structure
	CAGL0L10956g	1.42238692776434		Ortholog(s) have role in cellular response to lithium ion, cellular response to neutral pH, entry into host and filamentous growth of a population of unicellular organisms in response to pH, more	C1_09380W	RIM20	Protein involved in the pH response pathway; binds to the transcription factor Rim101 and may serve as a scaffold to facilitate the C-terminal proteolytic cleavage that activates Rim101; required for alkaline pH-induced hyphal growth	YOR275C	RIM20		Mitochondrial hsp70-type molecular chaperone; required for assembly of iron/sulfur clusters into proteins at a step after cluster synthesis, and for maturation of Yfh1p, which is a homolog of human frataxin implicated in Friedreich's ataxia
	CAGL0K09482g	1.49866899946173		Ortholog(s) have role in cellular ion homeostasis, mitochondrion inheritance and mitochondrial inner membrane localization				YOR147W	MDM32		Copper-binding transcription factor; activates transcription of the metallothionein genes CUP1-1 and CUP1-2 in response to elevated copper concentrations; required for regulation of copper genes in response to DNA-damaging reagents; CUP2 has a paralog, HAA1, that arose from the whole genome duplication
	CAGL0G04917g	1.76274567861495		Ortholog(s) have role in intracellular sequestering of iron ion, iron-sulfur cluster assembly, protein maturation and mitochondrial matrix localization	C7_04010W	SSQ1	Protein involved in intracellular sequestering of iron ion and mitochondrial iron-sulfur cluster assembly; repression leads to defects in respiratory growth, activation of autophagy, attenuated virulence	YLR369W	SSQ1	Hsp70 family ATPase SSQ1|SSH1|SSC2	Membrane protein involved in zinc ion homeostasis; member of the four-protein IZH family; expression induced by fatty acids and altered zinc levels; deletion reduces sensitivity to excess zinc; possible role in sterol metabolism; protein increases in abundance and relocalizes from nucleus to ER upon DNA replication stress; IZH4 has a paralog, IZH1, that arose from the whole genome duplication
	CAGL0I04180g	1.91612502434826	AMT1	Metal-activated transcription factor; binds promoters of metallothionein genes; autoregulates its own expression; gene is downregulated in azole-resistant strain				YGL166W	CUP2	ACE1
	CAGL0I07491g	2.19333102183991		Ortholog(s) have role in cellular zinc ion homeostasis and fungal-type vacuole, nucleus localization				YOL101C	IZH4
	CAGL0H04279g	3.0458125095509	MT-IIB	Copper-binding metallothionein, involved in sequestration of metal ions; inducible by copper and silver; present in multiple (3-9) tandemly arranged copies in various strains							Low affinity glucose transporter of the major facilitator superfamily; expression is induced in low or high glucose conditions; HXT3 has a paralog, HXT5, that arose from the whole genome duplication
Carbon and energy metabolism	CAGL0A01826g	-5.63988307475283	HXT5	Ortholog(s) have glucose transmembrane transporter activity and plasma membrane localization				YDR345C	HXT3	hexose transporter HXT3	Hexose transporter with moderate affinity for glucose; induced in the presence of non-fermentable carbon sources, induced by a decrease in growth rate, contains an extended N-terminal domain relative to other HXTs; HXT5 has a paralog, HXT3, that arose from the whole genome duplication
	CAGL0K10428g	-4.41363885082351		Ortholog(s) have enzyme inhibitor activity, role in negative regulation of glycogen catabolic process and cytoplasm localization				YFR017C	IGD1		Putative transcription factor containing a C2H2 zinc finger; mutation affects transcriptional regulation of genes involved in growth on non-fermentable carbon sources, response to salt stress and cell wall biosynthesis; USV1 has a paralog, RGM1, that arose from the whole genome duplication
	CAGL0A02321g	-3.29548141049919	HXT3	Ortholog(s) have fructose transmembrane transporter activity, glucose transmembrane transporter activity, mannose transmembrane transporter activity and role in fructose import across plasma membrane, glucose import across plasma membrane				YHR096C	HXT5	hexose transporter HXT5	Potential adenine phosphoribosyltransferase; encodes a protein with similarity to adenine phosphoribosyltransferase, but artificially expressed protein exhibits no enzymatic activity; APT2 has a paralog, APT1, that arose from the whole genome duplication
	CAGL0J10494g	-2.48452711106802		Ortholog(s) have cytoplasm localization				YDR441C	APT2	adenine phosphoribosyltransferase APT2	Putative 1,3-beta-glucanosyltransferase; has similarity go other GAS family members; low abundance, possibly inactive member of the GAS family of GPI-containing proteins; localizes to the cell wall; mRNA induced during sporulation
	CAGL0L00649g	-2.32293906723216		Acetyl-coenzyme A synthetase	C2_10350C	ACS1	Acetyl-CoA synthetase; induced by human neutrophils; fluconazole-repressed; regulated by Nrg1/Mig1; colony morphology-related gene regulation by Ssn6; only in stationary phase cultures; rat catheter biofilm repressed, Spider biofilm induced	YAL054C	ACS1	acetate--CoA ligase 1|FUN44
	CAGL0B03663g	-2.31990928583518		Ortholog(s) have citrate (Si)-synthase activity and mitochondrion, peroxisome localization				YCR005C	CIT2	citrate (Si)-synthase CIT2	Polyphosphate phosphatase; hydrolyzes diphosphorylated inositol polyphosphates and diadenosine polyphosphates; high specificity for diadenosine hexa- and pentaphosphates; contains endopolyphosphatase activity with a high affinity for polyphosphates, an activity also observed for its human DIPP homologs; possesses mRNA decapping activity; nudix hydrolase family member; protein abundance increases …
	CAGL0F03883g	-2.21314387903951	GAS4	Putative glycoside hydrolase of the Gas/Phr family; predicted GPI-anchor				YMR215W	GAS3	putative 1,3-beta-glucanosyltransferase	Cytoplasmic malate dehydrogenase; one of three isozymes that catalyze interconversion of malate and oxaloacetate; involved in the glyoxylate cycle and gluconeogenesis during growth on two-carbon compounds; interacts with Pck1p and Fbp1
	CAGL0L04422g	-2.12673026170066		Ortholog(s) have bis(5'-adenosyl)-hexaphosphatase activity, bis(5'-adenosyl)-pentaphosphatase activity, diphosphoinositol-polyphosphate diphosphatase activity and endopolyphosphatase activity, more	C5_02220C		Putative polyphosphate phosphatase; role in hydrolysis of diphosphorylated inositol polyphosphates and diadenosine polyphosphates; Spider biofilm induced	YOR163W	DDP1	polyphosphatase DDP1	2-methylisocitrate lyase of the mitochondrial matrix; functions in the methylcitrate cycle to catalyze the conversion of 2-methylisocitrate to succinate and pyruvate; ICL2 transcription is repressed by glucose and induced by ethanol
	CAGL0E01705g	-2.04894239634057		Ortholog(s) have L-malate dehydrogenase activity, role in gluconeogenesis, protein import into peroxisome matrix and cytosol, nuclear periphery localization	CR_00540C	MDH1	Mitochondrial malate dehydrogenase; regulated by Mig1, Tup1, white-opaque switch, phagocytosis; induced in high iron; antigenic during murine and human infection; repressed in Spider biofilms by Bcr1, Tec1, Ndt80, Rob1, Brg1	YOL126C	MDH2	malate dehydrogenase MDH2
	CAGL0L09273g	-2.00231287937761		Ortholog(s) have isocitrate lyase activity, methylisocitrate lyase activity, role in propionate catabolic process, 2-methylcitrate cycle and mitochondrial matrix localization				YPR006C	ICL2	methylisocitrate lyase ICL2	Putative transporter, member of the sugar porter family; green fluorescent protein (GFP)-fusion protein localizes to the vacuolar membrane; YBR241C is not an essential gene; YBR241C has a paralog, VPS73, that arose from the whole genome duplication
	CAGL0J05852g	-1.95775820836344		Ortholog(s) have role in secondary metabolite biosynthetic process							Integral mitochondrial outer membrane (MOM) protein; dosage suppressor of an MDM10 null that reduces ERMES-related phenotypes, such as alterations in mitochondrial morphology, protein complex assembly, and lipid profile; dosage suppressor of MDM12, MDM34, and MMM1 null mutant growth defects; novel mechanism of MOM import involving Tom70p, the TOM complex, and the TIM23 complex, requiring mitochon…
	CAGL0C01771g	-1.9283753691727		Ortholog(s) have fungal-type vacuole membrane localization	CR_03040C	HGT18	Putative glucose transporter of the major facilitator superfamily; the C. albicans glucose transporter family comprises 20 members; 12 probable membrane-spanning segments; expressed in rich medium with 2% glucose	YBR241C	YBR241C		NADPH-dependent aldehyde reductase; utilizes aromatic and alophatic aldehyde substrates; member of the short-chain dehydrogenase/reductase superfamily
	CAGL0E05170g	-1.75263283639582	GRE2(A)	Putative methylglyoxal reductase (NADPH-dependent)				YGL157W	ARI1	carbonyl reductase (NADPH-dependent) ARI1	Autoregulatory, oleate-activated transcription factor; subunit of a heterodimeric complex with Oaf1p, which binds to oleate-response elements (ORE) in the promoter of genes involved in beta-oxidation of fatty acids, peroxisome organization and biogenesis, activating transcription in the presence of oleate; PIP2 has a paralog, OAF1, that arose from the whole genome duplication
	CAGL0B04213g	-1.73737684042027		Ortholog(s) have role in positive regulation of glycerol transport and cytoplasm localization				YPR115W	RGC1	GCA1
	CAGL0J07150g	-1.71263379455389		Ortholog(s) have RNA polymerase II core promoter proximal region sequence-specific DNA binding, transcriptional activator activity, RNA polymerase II core promoter proximal region sequence-specific binding activity				YOR363C	PIP2	oleate-activated transcription factor PIP2|OAF2	Cytochrome b2 (L-lactate cytochrome-c oxidoreductase); component of the mitochondrial intermembrane space, required for lactate utilization; expression is repressed by glucose and anaerobic conditions
	CAGL0H06633g	-1.70405677785947		Putative phosphoenolpyruvate carboxykinase; gene is downregulated in azole-resistant strain							Putative zinc finger DNA binding transcription factor; contains two N-terminal C2H2 zinc fingers and C-terminal proline rich domain; overproduction impairs cell growth and induces expression of genes involved in monosaccharide catabolism and aldehyde metabolism; regulates expression of of Y' telomeric elements and subtelomeric COS genes; relocalizes to the cytosol in response to hypoxia; RGM1 has…
	CAGL0K10736g	-1.69607253567186	CYB2	Ortholog(s) have L-lactate dehydrogenase (cytochrome) activity and glyoxysome, mitochondrial intermembrane space, nucleus localization	C1_13630W	CYB2	Putative cytochrome b2 precursor; induced in high iron; alkaline repressed; colony morphology-related gene regulation by Ssn6; Hap43-repressed; pider biofilm induced	YML054C	CYB2	FCB2	Intracellular sporulation-specific glucoamylase; involved in glycogen degradation; induced during starvation of a/a diploids late in sporulation, but dispensable for sporulation
	CAGL0E06116g	-1.65018665825465		Ortholog(s) have sequence-specific DNA binding activity, role in positive regulation of transcription from RNA polymerase II promoter and cytosol, nuclear chromatin localization				YMR182C	RGM1		Protein that regulates expression of Fo-F1 ATP synthase subunits; involved in the regulation of mitochondrial expression of subunits 6 (Atp6p) and 8 (Atp8p) of the Fo-F1 ATP synthase; functions with Nca3p
	CAGL0G02717g	-1.60034721951335		Ortholog(s) have glucan 1,4-alpha-glucosidase activity, role in glycogen catabolic process and Golgi apparatus, endoplasmic reticulum, fungal-type vacuole, prospore membrane localization	C3_01320C	SGA1	Putative glucoamylase; induced in oralpharyngeal candidasis; rat catheter and Spider biofilm induced	YIL099W	SGA1	glucan 1,4-alpha-glucosidase	NADH-dependent aldehyde reductase, involved in detoxification of furfural; expression is up-regulated in the presence of furfural and 5-hydroxymethylfurfural, which are compounds generated during lignocellulosic biomass pre-treatment; green fluorescent protein (GFP)-fusion protein localizes to both the cytoplasm and nucleus; protein abundance increases in response to DNA replication stress
	CAGL0F04851g	-1.59072205104856		Ortholog(s) have role in aerobic respiration, mRNA metabolic process and mitochondrial outer membrane localization	C3_03510C		Ortholog(s) have role in aerobic respiration, mRNA metabolic process and mitochondrial outer membrane localization	YPR155C	NCA2		D-2-hydroxyglutarate dehydrogenase, and minor D-lactate dehydrogenase; mitochondrial matrix protein that oxidizes D-2-hydroxyglutarate (D-2HG), an oncometabolite, to alpha-ketoglutarate with a minor role in lactate catabolism; located in the mitochondrial matrix
	CAGL0K09702g	-1.55340843894715		Putative stress-induced alcohol dehydrogenase; gene is upregulated in azole-resistant strain; protein differentially expressed in azole resistant strain	CR_03300C		Ortholog(s) have aldehyde dehydrogenase (NAD) activity, role in response to furfural and cytoplasm, nucleus localization	YNL134C	YNL134C		Protein of unknown function; required for growth on glycerol as a carbon source; the authentic, non-tagged protein is detected in highly purified mitochondria in high-throughput studies
	CAGL0J06314g	-1.53393418152193		Ortholog(s) have (R)-2-hydroxyglutarate dehydrogenase activity, D-lactate dehydrogenase (cytochrome) activity, FAD binding, actin binding activity and role in lactate catabolic process	C3_03040W	AIP2	Putative actin interacting protein; regulated by Gcn4; induced in response to amino acid starvation (3-AT); repressed by elevated CO2; flow model biofilm repressed	YDL178W	DLD2	D-lactate dehydrogenase|AIP2	Deoxycytidine monophosphate (dCMP) deaminase; involved in dUMP and dTMP biosynthesis; expression is NOT cell cycle regulated
	CAGL0G06380g	-1.50017402798145		Ortholog(s) have role in aerobic respiration and mitochondrion, nucleus localization	C5_01080C	GDS1	Putative mitochondrial protein; Hap43-repressed gene; Spider biofilm induced	YOR355W	GDS1		Mitochondrial component of the ERMES complex; links the ER to mitochondria and may promote inter-organellar calcium and phospholipid exchange as well as coordinating mitochondrial DNA replication and growth; required for mitophagy; ERMES complex is often co-localized with peroxisomes and with concentrated areas of pyruvate dehydrogenase
	CAGL0G05852g	-1.48992803628532		Ortholog(s) have dCMP deaminase activity, role in dTMP biosynthetic process, dUMP biosynthetic process and cytosol, nucleus localization	C1_14310W		Deoxycytidine monophosphate (dCMP) deaminase; role in dUMP and dTMP biosynthesis; Spider biofilm repressed	YHR144C	DCD1	deoxycytidine monophosphate deaminase
	CAGL0L07656g	-1.457173827301	GLO1	Ortholog(s) have lactoylglutathione lyase activity, zinc ion binding activity, role in glutathione metabolic process, methylglyoxal catabolic process to D-lactate via S-lactoyl-glutathione and cytosol, nucleus localization							Vacuolar alpha mannosidase; involved in free oligosaccharide (fOS) degradation; delivered to the vacuole in a novel pathway separate from the secretory pathway
	CAGL0H09504g	-1.44971963425352		Ortholog(s) have oxygen-dependent protoporphyrinogen oxidase activity, role in heme biosynthetic process and cytosol, mitochondrial inner membrane, nucleus localization	C1_08880W	HEM14	Putative protoporphyrinogen oxidase; involved in heme biosynthesis; predicted Kex2p substrate; iron regulated transcript; Yfh1-induced; Hap43-repressed; rat catheter biofilm repressed	YER014W	HEM14	oxygen-dependent protoporphyrinogen oxidase	Zinc-finger protein; involved in transcriptional control of both nuclear and mitochondrial genes, many of which specify products required for glycerol-based growth, respiration, and other functions; RSF2 has a paralog, TDA9, that arose from the whole genome duplication; relocalizes from nucleus to cytoplasm upon DNA replication stress
	CAGL0E05148g	-1.44817822188116		Ortholog(s) have alpha-mannosidase activity, role in oligosaccharide catabolic process and cytosol, fungal-type vacuole membrane localization	C4_02360W	AMS1	Putative alpha-mannosidase; transcript regulated by Nrg1; induced during cell wall regeneration; flow model biofilm induced; Spider biofilm induced	YGL156W	AMS1	alpha-mannosidase	Protein involved in regulation of the mitochondrial F1F0-ATP synthase; Stf1p and Stf2p act as stabilizing factors that enhance inhibitory action of the Inh1p protein; protein abundance increases in response to DNA replication stress; STF1 has a paralog, INH1, that arose from the whole genome duplication
	CAGL0J09262g	-1.33169374369503		Ortholog(s) have ATPase binding activity, role in negative regulation of ATPase activity and mitochondrion localization				YDL130W-A	STF1	ATPase-binding protein|AIS2	Cyclin; interacts with Pho85p cyclin-dependent kinase (Cdk) to phosphorylate and regulate glycogen synthase, also activates Pho85p for Glc8p phosphorylation; PCL8 has a paralog, PCL10, that arose from the whole genome duplication
	CAGL0M12881g	-1.24344889354839		Ortholog(s) have dihydroorotate dehydrogenase activity, role in 'de novo' UMP biosynthetic process and mitochondrion localization							Orotidine-5'-phosphate (OMP) decarboxylase; catalyzes the sixth enzymatic step in the de novo biosynthesis of pyrimidines, converting OMP into uridine monophosphate (UMP); converts 5-FOA into 5-fluorouracil, a toxic compound
	CAGL0E05918g	-1.23386825909926		Ortholog(s) have role in negative regulation of glycogen biosynthetic process				YPL219W	PCL8		Citrate and oxoglutarate carrier protein; exports citrate from and imports oxoglutarate into the mitochondrion, causing net export of NADPH reducing equivalents; also associates with mt nucleoids and has a role in replication and segregation of the mt genome
	CAGL0I03080g	-1.23062444217094	URA3	Orotidine 5'-phosphate decarboxylase, catalyzes a step in pyrimidine biosynthesis; protein abundance decreased in ace2 mutant cells	C3_01350C	URA3	Orotidine-5'-phosphate decarboxylase; pyrimidine biosynthesis; gene used as genetic marker; decreased expression when integrated at ectopic chromosomal locations can cause defects in hyphal growth and virulence; Spider biofilm repressed	YEL021W	URA3	orotidine-5'-phosphate decarboxylase	Mitochondrial inner membrane transporter; transports oxaloacetate, sulfate, thiosulfate, and isopropylmalate; member of the mitochondrial carrier family
	CAGL0K07436g	-1.18104572142218		Ortholog(s) have DNA binding, tricarboxylate secondary active transmembrane transporter activity and role in alpha-ketoglutarate transport, mitochondrial citrate transport, mitochondrial genome maintenance	C6_00600C	YHM2	Predicted carrier protein; exports citrate from and imports oxoglutarate into the mitochondrion; alkaline induced; Spider biofilm repressed	YMR241W	YHM2		Putative phosphomutase; contains a region homologous to the active site of phosphomutases; overexpression suppresses the histidine auxotrophy of an ade3 ade16 ade17 triple mutant and the temperature sensitivity of a tps2 mutant
	CAGL0K11616g	-1.08988721046575		Putative mitochondrial inner membrane transporter; gene is upregulated in azole-resistant strain	C3_06220C	OAC1	Putative mitochondrial inner membrane transporter; rat catheter biofilm induced	YKL120W	OAC1		Putative mitochondrial inner membrane transporter; proposed role in oleate metabolism and glutamate biosynthesis; member of the mitochondrial carrier (MCF) family; YMC2 has a paralog, YMC1, that arose from the whole genome duplication
	CAGL0K07524g	-1.08572362592383	PMU1	Protein with a phosphomutase-like domain	C3_06920W		Putative phosphomutase-like protein; protein present in exponential and stationary growth phase yeast; Hap43-repressed; Spider biofilm repressed	YKL128C	PMU1	putative phosphomutase	Putative targeting subunit for type-1 protein phosphatase Glc7p; tethers Glc7p to Gsy2p glycogen synthase; PIG1 has a paralog, GAC1, that arose from the whole genome duplication
	CAGL0K12210g	-1.06952065689095		Ortholog(s) have organic acid transmembrane transporter activity, role in mitochondrial transport, transmembrane transport and mitochondrion localization				YBR104W	YMC2	organic acid transporter	Fructose-2,6-bisphosphatase, required for glucose metabolism; protein abundance increases in response to DNA replication stress
	CAGL0F04917g	-1.06777160520296		Putative regulatory subunit for protein phosphatase; gene is upregulated in azole-resistant strain				YLR273C	PIG1	protein phosphatase regulator PIG1	Protein required for assembly of succinate dehydrogenase; interacts with flavinylated Sdh1p and may function as a chaperone for free Sdh1p, protecting its FAD cofactor from redox reactions before assembly of the complex; soluble protein of the mitochondrial matrix; respiratory defect of null mutant is functionally complemented by Drosophila and human orthologs
	CAGL0I06094g	-1.05147337457725	FBP26	Ortholog(s) have fructose-2,6-bisphosphate 2-phosphatase activity, role in glucose metabolic process and cytoplasm localization	CR_08550W		Ortholog(s) have fructose-2,6-bisphosphate 2-phosphatase activity, role in glucose metabolic process and cytoplasm localization	YJL155C	FBP26	fructose-2,6-bisphosphatase	Trans-aconitate methyltransferase; cytosolic enzyme that catalyzes the methyl esterification of 3-isopropylmalate, an intermediate of the leucine biosynthetic pathway, and trans-aconitate, which inhibits the citric acid cycle
	CAGL0I09394g	-1.05012007253038		Ortholog(s) have role in mitochondrial respiratory chain complex II assembly and mitochondrial matrix localization	C2_02620W		Putative mitochondrial protein of unknown function; regulated by Sef1p-, Sfu1p-, and Hap43p	YBR269C	SDH8	FMP21
	CAGL0L12012g	-1.02855923519498		Ortholog(s) have trans-aconitate 3-methyltransferase activity and cytosol localization	C1_05830W		Ortholog(s) have trans-aconitate 3-methyltransferase activity and cytosol, nucleus localization	YER175C	TMT1	TAM1	C6 zinc cluster transcriptional activator; binds to the carbon source-responsive element (CSRE) of gluconeogenic genes; involved in the positive regulation of gluconeogenesis; regulated by Snf1p protein kinase; localized to the nucleus
	CAGL0J00451g	-1.00931608217763		Putative glyceraldehyde-3-phosphate dehydrogenase; protein differentially expressed in azole resistant strain; expression downregulated in biofilm vs planktonic cell culture							Subunit of the mitochondrial F1F0 ATP synthase; F1F0 ATP synthase is a large, evolutionarily conserved enzyme complex required for ATP synthesis; termed subunit I or subunit j; does not correspond to known ATP synthase subunits in other organisms
	CAGL0L03377g	-1.00672797319185		Ortholog(s) have RNA polymerase II core promoter proximal region sequence-specific DNA binding, transcriptional activator activity, RNA polymerase II core promoter proximal region sequence-specific binding activity	C3_04020C	ZCF16	Predicted Zn(II)2Cys6 transcription factor; mutants are viable; rat catheter biofilm induced	YJL089W	SIP4		Protein required for fermentation at low temperature; plays a role in the maturation of secretory proteins; the authentic, non-tagged protein is detected in highly purified mitochondria in high-throughput studies
	CAGL0H04191g	1.01060689753645		Ortholog(s) have proton-transporting ATP synthase activity, rotational mechanism activity and role in ATP synthesis coupled proton transport, mitochondrial proton-transporting ATP synthase complex assembly, protein complex oligomerization	C2_00610C	ATP18	F1F0 ATP synthase complex subunit; gene has intron	YML081C-A	ATP18	F1F0 ATP synthase subunit i	Hexokinase isoenzyme 1; a cytosolic protein that catalyzes phosphorylation of glucose during glucose metabolism; expression is highest during growth on non-glucose carbon sources; glucose-induced repression involves hexokinase Hxk2p; HXK1 has a paralog, HXK2, that arose from the whole genome duplication
	CAGL0L12210g	1.02810636577012		Ortholog(s) have role in fermentation, protein maturation and mitochondrion localization	C5_00330C		Ortholog(s) have role in fermentation, protein maturation and mitochondrion localization	YLR087C	CSF1		Membrane-associated mitochondrial ribosome receptor; forms a complex with Mdm38p that may facilitate recruitment of mRNA-specific translational activators to ribosomes; possible role in protein export from the matrix to inner membrane
	CAGL0A04829g	1.02830490861569		Putative hexokinase isoenzyme 2; protein differentially expressed in azole resistant strain	C6_04580W	HXK1	N-acetylglucosamine (GlcNAc) kinase; involved in GlcNAc utilization; required for wild-type hyphal growth and mouse virulence; GlcNAc-induced transcript; induced by alpha pheromone in SpiderM medium	YFR053C	HXK1	hexokinase 1	Cytochrome b reductase; not essential for viability; also detected in mitochondria; mutation in conserved NADH binding domain of the human ortholog results in type I methemoglobinemia
	CAGL0J04268g	1.03340480632893		Ortholog(s) have acetate CoA-transferase activity, acetyl-CoA hydrolase activity, succinyl-CoA hydrolase activity, role in propionate metabolic process, methylcitrate cycle, response to acetate and glyoxysome, mitochondrion localization							Lysophosphatidic acid acyltransferase; involved in triacelglyceride homeostasis and lipid droplet formation; localized to lipid droplets and the ER; specificity for oleoyl-CoA
	CAGL0M06391g	1.04020478943934		Ortholog(s) have ribosome binding activity	C3_06050C		Ortholog(s) have ribosome binding activity	YBR185C	MBA1		E1 beta subunit of the pyruvate dehydrogenase (PDH) complex; PDH is an evolutionarily conserved multi-protein complex found in mitochondria
	CAGL0L00847g	1.04143272436863		Ortholog(s) have cytochrome-b5 reductase activity, acting on NAD(P)H activity and endoplasmic reticulum, mitochondrial outer membrane, nucleus, plasma membrane localization	C4_05450C	CBR1	Putative cytochrome B5 reductase; plasma membrane-localized	YIL043C	CBR1	CBR5	Hexokinase isoenzyme 2; phosphorylates glucose in cytosol; predominant hexokinase during growth on glucose; represses expression of HXK1, GLK1, induces expression of its own gene; antiapoptotic; phosphorylation/dephosphorylation at Ser14 by kinase Snf1p, phosphatase Glc7p-Reg1p regulates nucleocytoplasmic shuttling of Hxk2p; functions downstream of Sit4p in control of cell cycle, mitochondrial fu…
	CAGL0K06831g	1.05480316160759		Ortholog(s) have pyruvate dehydrogenase (acetyl-transferring) activity and role in acetyl-CoA biosynthetic process from pyruvate, arginine biosynthetic process, glutamine biosynthetic process	C4_04150C	PDB1	Putative pyruvate dehydrogenase; fluconazole-induced; protein level decreases in stationary phase cultures; Spider biofilm repressed	YBR221C	PDB1	pyruvate dehydrogenase (acetyl-transferring) subunit E1 beta	Regulatory subunit of trehalose-6-phosphate synthase/phosphatase; involved in synthesis of storage carbohydrate trehalose; expression is induced by stress conditions and repressed by the Ras-cAMP pathway; TPS3 has a paralog, TSL1, that arose from the whole genome duplication
	CAGL0H07579g	1.05551407866155	HXK2	Putative hexokinase B	CR_04510W	HXK2	Hexokinase II; antigenic in humans; repressed by human neutrophils; Efg1-regulated; fluconazole-induced; gene regulation by Ssn6; present in exponential and stationary growth phase; flow model biofilm induced; Spider biofilm repressed	YGL253W	HXK2	hexokinase 2|SCI2|HKB|HEX1	Subunit VIb of cytochrome c oxidase; cytochrome c oxidase is also known as respiratory Complex IV and is the terminal member of the mitochondrial inner membrane electron transport chain; required for assembly of cytochrome c oxidase but not required for activity after assembly; phosphorylated; easily released from the intermembrane space, suggesting a loose association with Complex IV
	CAGL0H02387g	1.0771789405101		Putative trehalose-6-phosphate synthase/phosphatase subunit; gene is upregulated in azole-resistant strain	C2_10690W	TPS3	Predicted trehalose-phosphate synthase regulatory subunit; regulated by Efg1; regulated by Tsa1, Tsa1B under H2O2 stress conditions; flow model biofilm induced (reports differ)	YMR261C	TPS3	trehalose 6-phosphate synthase/phosphatase complex subunit	Subunit 2 of ubiquinol cytochrome-c reductase (Complex III); Complex III is a component of the mitochondrial inner membrane electron transport chain; phosphorylated; transcription is regulated by Hap1p, Hap2p/Hap3p, and heme
	CAGL0A03542g	1.0791157905386	COX12	Cytochrome c oxidase	C6_04250W		Ortholog(s) have cytochrome-c oxidase activity, role in mitochondrial respiratory chain complex IV assembly and cytosol, mitochondrial intermembrane space, mitochondrial respiratory chain complex IV, nucleus localization	YLR038C	COX12	cytochrome c oxidase subunit VIb	Subunit 9 of ubiquinol cytochrome-c reductase (Complex III); Complex III is a component of the mitochondrial inner membrane electron transport chain; required for electron transfer at the ubiquinol oxidase site of the complex
	CAGL0G10131g	1.08002124179626		Ortholog(s) have ubiquinol-cytochrome-c reductase activity and role in aerobic respiration, mitochondrial electron transport, ubiquinol to cytochrome c	C5_03350W	QCR2	Ubiquinol-cytochrome-c reductase; antigenic; induced by interaction with macrophage; repressed by nitric oxide; in detergent-resistant membrane fraction (possible lipid raft component); levels decrease in stationary phase; Hap43p-repressed	YPR191W	QCR2	ubiquinol--cytochrome-c reductase subunit 2|UCR2|COR2	Chaperone that facilitates the assembly of cytochrome c oxidase; integral to the mitochondrial inner membrane; interacts with a subcomplex of subunits VII, VIIa, and VIII (Cox7p, Cox9p, and Cox8p) but not with the holoenzyme
	CAGL0H09328g	1.10737800154084		Ortholog(s) have ubiquinol-cytochrome-c reductase activity and role in aerobic respiration, mitochondrial electron transport, ubiquinol to cytochrome c, mitochondrial respiratory chain complex III assembly	C4_02890C	QCR9	Putative ubiquinol cytochrome c reductase; shows colony morphology-related gene regulation by Ssn6p	YGR183C	QCR9	ubiquinol--cytochrome-c reductase subunit 9|UCR9
	CAGL0K10120g	1.11077277405568		Ortholog(s) have unfolded protein binding activity, role in mitochondrial respiratory chain complex IV assembly and integral component of mitochondrial inner membrane, plasma membrane localization	C1_09960W	PET100	Chaperone that facilitates the assembly of cytochrome c oxidase; plasma membrane protein	YDR079W	PET100		Mitochondrial aldehyde dehydrogenase; involved in regulation or biosynthesis of electron transport chain components and acetate formation; activated by K+; utilizes NADP+ as the preferred coenzyme; constitutively expressed
	CAGL0H08327g	1.11557103233466	TPI1	Putative triose-phosphate isomerase; protein abundance decreased in ace2 mutant cells							Mitochondrial protein required for respiratory growth; mutant phenotype and genetic interactions suggest a role in delivering mt mRNAs to ribosomes; located on matrix face of the inner membrane and loosely associated with mitoribosomes; RMD9 has a paralog, YBR238C, that arose from the whole genome duplication
	CAGL0J03212g	1.11939642867845	ALD5	Putative mitochondrial aldehyde dehydrogenase (NAD+); protein abundance increased in ace2 mutant cells	C2_02970C	ALD5	NAD-aldehyde dehydrogenase; decreased expression in fluconazole-resistant isolate, or in hyphae; biofilm induced; fluconazole-downregulated; protein abundance is affected by URA3 expression in the CAI-4 strain; stationary phase enriched	YER073W	ALD5	aldehyde dehydrogenase (NAD(P)(+)) ALD5	Putative ribokinase
	CAGL0F07469g	1.12053748255095		Ortholog(s) have mRNA binding activity, role in aerobic respiration, regulation of mRNA stability, translational initiation and extrinsic component of mitochondrial inner membrane localization				YGL107C	RMD9		Subunit b of the stator stalk of mitochondrial F1F0 ATP synthase; ATP synthase is a large, evolutionarily conserved enzyme complex required for ATP synthesis; contributes to the oligomerization of the complex, which in turn determines the shape of inner membrane cristae; phosphorylated
	CAGL0L08228g	1.14263376642588		Ortholog(s) have cytosol, nucleus localization	C1_12780W	RBK1	Ortholog(s) have cytosol, nucleus localization	YCR036W	RBK1	putative ribokinase	Cytochrome c oxidase subunit; has a role in assembly of respiratory supercomplexes; similar to Rcf1p, and either Rcf1p or Rcf2p is required for late-stage assembly of the Cox12p and Cox13p subunits and for cytochrome c oxidase activity; associates with the cytochrome c oxidase - cytochrome bc1 supercomplex; null mutant accumulates reactive oxygen species; member of the conserved hypoxia induced g…
	CAGL0H05489g	1.14846236502244		Ortholog(s) have proton-transporting ATP synthase activity, rotational mechanism, proton-transporting ATPase activity, rotational mechanism activity and role in ATP synthesis coupled proton transport, protein complex oligomerization	C2_05500W	ATP4	Putative F0-ATP synthase subunit 4; macrophage/pseudohyphal-induced; present in exponential and stationary growth phases	YPL078C	ATP4	F1F0 ATP synthase subunit 4|LPF7	Oleate-activated transcription factor; subunit of a heterodimeric complex with Pip2p, which binds to oleate-response elements (ORE) in the promoter of genes involved in beta-oxidation of fatty acids, peroxisome organization and biogenesis, activating transcription in the presence of oleate; regulates chromatin silencing at telomeres; involved in diauxic shift; OAF1 has a paralog, PIP2, that arose…
	CAGL0M10549g	1.16301719042877		Ortholog(s) have role in mitochondrial respiratory chain complex IV assembly and integral component of mitochondrial inner membrane, mitochondrial respiratory chain supercomplex, plasma membrane localization	C1_08610C		Ortholog of S. cerevisiae Aim38/Rcf2, cytochrome c oxidase subunit; plasma membrane localized; Hap43-repressed; induced in oralpharyngeal candidasis; flow model biofilm induced; Spider biofilm repressed	YNR018W	RCF2	AIM38	Gamma subunit of the F1 sector of mitochondrial F1F0 ATP synthase; F1F0 ATP synthase is a large, evolutionarily conserved enzyme complex required for ATP synthesis
	CAGL0M12298g	1.16875983736488		Ortholog(s) have RNA polymerase II core promoter proximal region sequence-specific DNA binding, sequence-specific DNA binding and transcriptional activator activity, more	C3_05930W	CTA4	Zn(II)2Cys6 transcription factor; induced by nitric oxide; induced by Mnl1 under weak acid stress; repressed upon adherence to polystyrene; Hap43-repressed; Spider biofilm induced	YAL051W	OAF1	oleate-activated transcription factor OAF1|YAF1	Phosphoglucomutase, minor isoform; catalyzes the conversion from glucose-1-phosphate to glucose-6-phosphate, which is a key step in hexose metabolism; PGM1 has a paralog, PGM2, that arose from the whole genome duplication
	CAGL0I04686g	1.18500858970993		Ortholog(s) have ATPase activity, proton-transporting ATP synthase activity, rotational mechanism, proton-transporting ATPase activity, rotational mechanism activity and role in ATP synthesis coupled proton transport	CR_01310W	ATP3	F1-ATP synthase complex subunit; caspofungin repressed; flucytosine and macrophage/pseudohyphal-induced; present in exponential and stationary growth phases; Hap43p-induced gene	YBR039W	ATP3	F1F0 ATP synthase subunit gamma	3-phosphoglycerate kinase; catalyzes transfer of high-energy phosphoryl groups from the acyl phosphate of 1,3-bisphosphoglycerate to ADP to produce ATP; key enzyme in glycolysis and gluconeogenesis
	CAGL0K07480g	1.18823266768402	PGM1	Putative phosphoglucomutase				YKL127W	PGM1	phosphoglucomutase PGM1	Molecular chaperone; required for the assembly of alpha and beta subunits into the F1 sector of mitochondrial F1F0 ATP synthase; N-terminally propionylated in vivo
	CAGL0L07722g	1.19793845835571	PGK1	Putative 3-phosphoglycerate kinase; protein differentially expressed in azole resistant strain; protein abundance increased in ace2 mutant cells	C6_00750C	PGK1	Phosphoglycerate kinase; localizes to cell wall and cytoplasm; antigenic in murine/human infection; flow model biofilm, Hog1-, Hap43-, GCN-induced; repressed upon phagocytosis; repressed in Spider biofilms by Bcr1, Ndt80, Rob1, Brg1	YCR012W	PGK1	phosphoglycerate kinase	Epsilon subunit of the F1 sector of mitochondrial F1F0 ATP synthase; which is a large, evolutionarily conserved enzyme complex required for ATP synthesis; F1 translationally regulates ATP6 and ATP8 expression to achieve a balanced output of ATP synthase genes encoded in nucleus and mitochondria; phosphorylated
	CAGL0M04037g	1.19943370537369		Molecular chaperone that transiently binds to alpha and beta of the mitochondrial F1F0 ATP synthase	C7_01350C		Ortholog(s) have unfolded protein binding activity, role in mitochondrial proton-transporting ATP synthase complex assembly and mitochondrion localization	YNL315C	ATP11		Protein involved in respiratory chain complex assembly or maintenance; protein of the mitochondrial intermembrane space; contains twin Cx9C motifs that can form coiled coil-helix-coiled-coil helix fold
	CAGL0A01111g	1.20285909263555		Ortholog(s) have proton-transporting ATP synthase activity, rotational mechanism activity, role in ATP synthesis coupled proton transport and mitochondrial proton-transporting ATP synthase, central stalk localization				YPL271W	ATP15	F1F0 ATP synthase subunit epsilon|ATPEPSILON	Homolog of Gpm1p phosphoglycerate mutase; converts 3-phosphoglycerate to 2-phosphoglycerate in glycolysis; may be non-functional; GPM2 has a paralog, GPM3, that arose from the whole genome duplication
	CAGL0A04389g	1.20531854637627		Ortholog(s) have role in mitochondrial respiratory chain complex assembly and mitochondrial intermembrane space, nucleus localization	C7_03380W		Ortholog(s) have role in mitochondrial respiratory chain complex assembly and mitochondrial intermembrane space, nucleus localization	YBL059C-A	CMC2		Alpha subunit of succinyl-CoA ligase; succinyl-CoA ligase is a mitochondrial enzyme of the TCA cycle that catalyzes the nucleotide-dependent conversion of succinyl-CoA to succinate; phosphorylated
	CAGL0K01705g	1.20649935427584		Ortholog(s) have cytoplasm localization				YDL021W	GPM2	phosphoglycerate mutase family protein GPM2	Sedoheptulose bisphosphatase involved in riboneogenesis; dephosphorylates sedoheptulose 1,7-bisphosphate, which is converted via the nonoxidative pentose phosphate pathway to ribose-5-phosphate; facilitates the conversion of glycolytic intermediates to pentose phosphate units; also has fructose 1,6-bisphosphatase activity but this is probably not biologically relevant, since deletion does not aff…
	CAGL0I07139g	1.20973450882982		Ortholog(s) have succinate-CoA ligase (ADP-forming) activity, role in succinyl-CoA metabolic process and mitochondrial nucleoid localization	C1_01690C	LSC1	Putative succinate-CoA ligase subunit; induced by high iron; fluconazole-induced; protein present in exponential and stationary growth phase yeast cultures; Spider biofilm repressed	YOR142W	LSC1	succinate--CoA ligase (GDP-forming) subunit alpha	Alcohol dehydrogenase; fermentative isozyme active as homo- or heterotetramers; required for the reduction of acetaldehyde to ethanol, the last step in the glycolytic pathway; ADH1 has a paralog, ADH5, that arose from the whole genome duplication
	CAGL0L03311g	1.21200665959923		Ortholog(s) have sedoheptulose-bisphosphatase activity, role in ribose phosphate biosynthetic process and cytoplasm, nucleus localization	C2_07420W		Putative phosphoglycerate mutase family protein; stationary phase enriched protein; early-stage flow model biofilm induced; Spider biofilm repressed	YKR043C	SHB17	sedoheptulose-bisphosphatase	Cytochrome c1; component of the mitochondrial respiratory chain; expression is regulated by the heme-activated, glucose-repressed Hap2p/3p/4p/5p CCAAT-binding complex
	CAGL0I07843g	1.23435822564987	ADH1	Putative alcohol dehydrogenase isoenzyme III; increased protein abundance in azole resistant strain	C1_08330C	ADH2	Alcohol dehydrogenase; soluble in hyphae; expression regulated by white-opaque switching; regulated by Ssn6; indued by Mnl1 in weak acid stress; protein enriched in stationary phase yeast cultures; Spider biofilm induced	YOL086C	ADH1	alcohol dehydrogenase ADH1|ADC1	Subunit of the ubiqunol-cytochrome c oxidoreductase complex; this complex comprises part of the mitochondrial respiratory chain; members include Cobp, Rip1p, Cyt1p, Cor1p, Qcr2p, Qcr6p, Qcr7p, Qcr8p, Qcr9p, and Qcr10p and comprises part of the mitochondrial respiratory chain
	CAGL0L10406g	1.24449483344634	CYT1	Ortholog(s) have electron transporter, transferring electrons within CoQH2-cytochrome c reductase complex activity and role in mitochondrial electron transport, ubiquinol to cytochrome c	C2_04950C	CYT1	Cytochrome c1; induced in high iron; alkaline repressed; possibly an essential gene, disruptants not obtained by UAU1 method; Hap43-repressed; Spider biofilm repressed	YOR065W	CYT1	ubiquinol--cytochrome-c reductase catalytic subunit CYT1|YOR29-16|CTC1	NAD-dependent (R,R)-butanediol dehydrogenase; catalyzes oxidation of (R,R)-2,3-butanediol to (3R)-acetoin, oxidation of meso-butanediol to (3S)-acetoin, and reduction of acetoin; enhances use of 2,3-butanediol as an aerobic carbon source
	CAGL0K02893g	1.2475788388852		Ortholog(s) have ubiquinol-cytochrome-c reductase activity, role in aerobic respiration, mitochondrial electron transport, ubiquinol to cytochrome c and mitochondrial respiratory chain complex III localization	C1_06050C		Ortholog(s) have ubiquinol-cytochrome-c reductase activity, role in aerobic respiration, mitochondrial electron transport, ubiquinol to cytochrome c and mitochondrial respiratory chain complex III localization	YHR001W-A	QCR10	ubiquinol--cytochrome-c reductase subunit 10	Protein required for assembly of respiratory complex III; mitochondrial inner membrane protein; required for an early step in assembly of respiratory complex III (cytochrome bc1 complex); mRNA is targeted to mitochondria
	CAGL0D00198g	1.24971736303001		Ortholog(s) have (R,R)-butanediol dehydrogenase activity, role in butanediol biosynthetic process and cytoplasm localization				YAL060W	BDH1	(R,R)-butanediol dehydrogenase|BDH	6-phosphofructo-2-kinase; catalyzes synthesis of fructose-2,6-bisphosphate; inhibited by phosphoenolpyruvate and sn-glycerol 3-phosphate, expression induced by glucose and sucrose, transcriptional regulation involves protein kinase A
	CAGL0L13178g	1.2785767326351		Ortholog(s) have role in mitochondrial respiratory chain complex III assembly and integral component of mitochondrial inner membrane localization	C1_02490C		Putative mitochondrial inner membrane protein with a predicted role in the assembly of respiratory complex III; Hap43p-repressed gene; S. cerevisiae ortholog FMP25 localizes to mitochondrion	YLR077W	FMP25	BCA1	Zinc finger transcriptional repressor; cooperates with Mig1p in glucose-induced gene repression; under low glucose conditions relocalizes to mitochondrion, where it interacts with Ups1p, antagonizes mitochondrial fission factor Dnm1p, indicative of a role in mitochondrial fusion or regulating morphology; regulates filamentous growth in response to glucose depletion; activated in stochastic pulses…
	CAGL0E01529g	1.28077911209237		Ortholog(s) have role in fructose 2,6-bisphosphate metabolic process, regulation of glycolytic process	C1_11080W		Putative 6-phosphofructo-2-kinase; catalyzes synthesis of fructose-2,6-bisphosphate; Hap43-repressed; flow model, rat catheter and Spider biofilm induced	YOL136C	PFK27	6-phosphofructo-2-kinase|PFK-2	Mitochondrial inner membrane insertase; mediates the insertion of both mitochondrial- and nuclear-encoded proteins from the matrix into the inner membrane; also has a role in insertion of carrier proteins into the inner membrane; acts as a voltage-gated ion channel, activated by substrate peptides; interacts with mitochondrial ribosomes; conserved from bacteria to animals
	CAGL0K09372g	1.37840045504919		Ortholog(s) have RNA polymerase II core promoter proximal region sequence-specific DNA binding, transcriptional repressor activity, RNA polymerase II core promoter proximal region sequence-specific binding activity				YGL209W	MIG2	MLZ1	Subunit d of the stator stalk of mitochondrial F1F0 ATP synthase; F1F0 ATP synthase is a large, evolutionarily conserved enzyme complex required for ATP synthesis
	CAGL0I06534g	1.38111021319118		Ortholog(s) have ion channel activity, membrane insertase activity, mitochondrial ribosome binding activity	C7_01600W		Conserved mitochondrial inner membrane insertase; mediates insertion of mitochondrial- and nuclear-encoded proteins from the matrix into the inner membrane; Spider biofilm repressed	YER154W	OXA1	membrane insertase OXA1|PET1402	Cytochrome c oxidase subunit; required for assembly of the Complex III-Complex IV supercomplex, and for assembly of Cox13p and Rcf2p into cytochrome c oxidase; similar to Rcf2p, and either Rcf1p or Rcf2p is required for late-stage assembly of the Cox12p and Cox13p subunits and for cytochrome c oxidase activity; required for growth under hypoxic conditions; member of the hypoxia induced gene famil…
	CAGL0L09713g	1.39665413309538	ATP7	F1F0-ATPase complex, FO D subunit	C1_07600W	ATP7	Putative subunit of the F1F0-ATPase complex; colony morphology-related gene regulation by Ssn6; farnesol, macrophage-downregulated protein abundance; protein present in exponential and stationary yeast growth phases; Hap43-induced	YKL016C	ATP7	F1F0 ATP synthase subunit d	Subunit g of the mitochondrial F1F0 ATP synthase; reversibly phosphorylated on two residues; unphosphorylated form is required for dimerization of the ATP synthase complex, which in turn determines oligomerization of the complex and the shape of inner membrane cristae
	CAGL0G07315g	1.40469531174244		Ortholog(s) have role in mitochondrial respiratory chain complex IV assembly, mitochondrial respiratory chain supercomplex assembly	C5_03800W		Cytochrome c oxidase subunit; membrane-localized protein; rat catheter biofilm induced	YML030W	RCF1	AIM31	Protein of unknown function; involved in energy metabolism under respiratory conditions; protein abundance is increased upon intracellular iron depletion or in response to DNA replication stress; RGI1 has a paralog, RGI2, that arose from the whole genome duplication
	CAGL0K02409g	1.49998208463833		Ortholog(s) have proton-transporting ATP synthase activity, rotational mechanism activity and role in ATP synthesis coupled proton transport, cristae formation, protein complex oligomerization	C1_12590W	ATP20	Putative mitochondrial ATP synthase; shows colony morphology-related gene regulation by Ssn6p; flucytosine induced; caspofungin repressed; macrophage/pseudohyphal-induced	YPR020W	ATP20	F1F0 ATP synthase subunit g	Beta subunit of the F1 sector of mitochondrial F1F0 ATP synthase; which is a large, evolutionarily conserved enzyme complex required for ATP synthesis; F1 translationally regulates ATP6 and ATP8 expression to achieve a balanced output of ATP synthase genes encoded in nucleus and mitochondria; phosphorylated
	CAGL0J03080g	1.56127334284229		Ortholog(s) have role in energy reserve metabolic process and cell periphery, cytoplasm, nucleus localization	C2_08290C	UCF1	Upregulated by cAMP in filamentous growth; induced in high iron, decreased upon yeast-hypha switch; downregulation correlates with clinical fluconazole resistance; Ras1-regulated; Hap43-repressed; flow model biofilm induced	YER067W	RGI1		Integral membrane protein of the ER; physically interacts with Kre6p; has a role in the synthesis of beta-1,6-glucan in the cell wall; required for cell viability
	CAGL0H00506g	1.58551782219935	ATP2	F1F0-ATPase complex, F1 beta subunit; expression upregulated in biofilm vs planktonic cell culture; protein abundance decreased in ace2 mutant cells	C4_00270W	ATP2	F1 beta subunit of F1F0 ATPase complex; antigenic in human, mice; induced by ciclopirox olamine; caspofungin repressed; macrophage/pseudohyphal-induced; detected during exponential and stationary growth phases; Spider biofilm repressed	YJR121W	ATP2	F1F0 ATP synthase subunit beta	Putative cytoplasmic short-chain dehydrogenase/reductase
	CAGL0C02101g	1.59152255425179		Ortholog(s) have role in (1->6)-beta-D-glucan biosynthetic process, chromosome organization and integral component of endoplasmic reticulum membrane localization	CR_05140W		Integral membrane protein of the ER; role in the synthesis of beta-1,6-glucan in the cell wall; S. cerevisiae ortholog required for cell viability; Spider biofilm induced	YFR042W	KEG1
	CAGL0F06897g	1.62594014880827		Putative protein with alcohol dehydrogenase domain; gene is downregulated in azole-resistant strain	C1_04430C		Putative protein of unknown function; clade-associated gene expression	YIR035C	YIR035C	sepiapterin reductase family protein	Alpha subunit of the F1 sector of mitochondrial F1F0 ATP synthase; which is a large, evolutionarily conserved enzyme complex required for ATP synthesis; F1 translationally regulates ATP6 and ATP8 expression to achieve a balanced output of ATP synthase genes encoded in nucleus and mitochondria; phosphorylated; N-terminally propionylated in vivo
	CAGL0K07568g	1.62810536567719	PMU3	Protein with a phosphomutase-like domain							Transcriptional activator of genes involved in glycolysis; interacts and functions with the DNA-binding protein Gcr1p
	CAGL0M09581g	1.68199250843766	ATP1	F1F0-ATPase complex, F1 alpha subunit	C1_04610W	ATP1	ATP synthase alpha subunit; antigenic in human/mouse; at hyphal surface; ciclopirox, ketoconazole, flucytosine induced; Efg1, caspofungin repressed; may be essential; sumoylation target; stationary phase-enriched; Spider biofilm repressed	YBL099W	ATP1	F1F0 ATP synthase subunit alpha	UDP-glucose pyrophosphorylase (UGPase); catalyses the reversible formation of UDP-Glc from glucose 1-phosphate and UTP, involved in a wide variety of metabolic pathways, expression modulated by Pho85p through Pho4p; involved in PKA-mediated oxidative stress resistance and long-term survival in stationary phase; UGP1 has a paralog, YHL012W, that arose from the whole genome duplication
	CAGL0C04455g	1.70760683068525	ATP16	F1F0-ATPase complex, F1 delta subunit; protein abundance decreased in ace2 mutant cells
	CAGL0G05379g	1.73838030185502		Ortholog(s) have RNA polymerase II activating transcription factor binding, transcription factor activity, RNA polymerase II transcription factor binding activity				YNL199C	GCR2		Glycogen synthase; expression induced by glucose limitation, nitrogen starvation, heat shock, and stationary phase; activity regulated by cAMP-dependent, Snf1p and Pho85p kinases as well as by the Gac1p-Glc7p phosphatase; GSY2 has a paralog, GSY1, that arose from the whole genome duplication; relocalizes from cytoplasm to plasma membrane upon DNA replication stress
	CAGL0L01925g	1.75781327982111	UGP1	Putative UDP-glucose pyrophosphorylase; increased protein abundance in azole resistant strain	CR_04660C	UGP1	UTP-glucose-1-phosphaturidyl transferase; localizes to yeast, not hyphal cell surface; Hog1-repressed; stationary phase enriched; induced in oralpharyngeal candidasis; rat catheter biofilm repressed; Bcr1-repressed in RPMI a/a biofilms	YKL035W	UGP1	UTP glucose-1-phosphate uridylyltransferase	Protein phosphatase; similar to prokaryotic phosphotransfer enzymes; null mutant shows alterations in glucose metabolism; GFP-fusion protein localizes to the cytoplasm and nucleus; YNL108C has a paralog, TFC7, that arose from the whole genome duplication
	CAGL0F04719g	1.95965542137152		Ortholog(s) have glycogen (starch) synthase activity, role in glycogen biosynthetic process and cytoplasm, nucleus localization				YLR258W	GSY2	glycogen (starch) synthase GSY2	Glycogenin glucosyltransferase; self-glucosylating initiator of glycogen synthesis, also glucosylates n-dodecyl-beta-D-maltoside; SWAT-GFP and mCherry fusion proteins localize to the cell periphery and vacuole respectively; similar to mammalian glycogenin; GLG1 has a paralog, GLG2, that arose from the whole genome duplication
	CAGL0I02904g	1.97900487374485		Ortholog(s) have phosphatase activity, role in dephosphorylation and cytoplasm, nucleus localization				YNL108C	YNL108C	HUF	Protein involved in ER-to-Golgi transport
	CAGL0H02695g	2.03696319079992		Ortholog(s) have glycogenin glucosyltransferase activity and role in glycogen biosynthetic process				YKR058W	GLG1	glycogenin glucosyltransferase GLG1	High-affinity glucose transporter; member of the major facilitator superfamily, expression is induced by low levels of glucose and repressed by high levels of glucose; HXT4 has a paralog, HXT7, that arose from the whole genome duplication
	CAGL0I09746g	2.14400724964319		Ortholog(s) have phosphoenolpyruvate transmembrane transporter activity, role in ER to Golgi vesicle-mediated transport, phosphoenolpyruvate transmembrane import into Golgi lumen and Golgi apparatus, endoplasmic reticulum localization	C6_00590W	SLY41	Protein involved in ER-to-Golgi transport; rat catheter and Spider biofilm induced	YOR307C	SLY41		Mitochondrial 3-oxoacyl-[acyl-carrier-protein] reductase; may comprise a type II mitochondrial fatty acid synthase along with Mct1p; human homolog CBR4 complements yeast null mutant
	CAGL0A01782g	3.30638285953341	HXT4	Ortholog(s) have glucose transmembrane transporter activity, pentose transmembrane transporter activity and plasma membrane localization				YHR092C	HXT4	hexose transporter HXT4|RAG1|LGT1
	CAGL0M13013g	3.77909432320542		Ortholog(s) have 3-oxoacyl-[acyl-carrier-protein] reductase (NADPH) activity, role in aerobic respiration, fatty acid metabolic process and mitochondrion localization	CR_00710C		Ortholog(s) have 3-oxoacyl-[acyl-carrier-protein] reductase (NADPH) activity, role in aerobic respiration, fatty acid metabolic process and mitochondrion localization	YKL055C	OAR1	3-oxoacyl-[acyl-carrier-protein] reductase (NADPH)	UbiB family protein; contains transmembrane domain and mitochondrial targeting sequence; the authentic, non-tagged protein is detected in highly purified mitochondria in high-throughput studies
Mitochondrion organization	CAGL0J07018g	-2.11034046719069		Ortholog(s) have mitochondrion localization	C4_02160C		Ortholog(s) have mitochondrion localization	YPL109C	YPL109C		Protein of unknown function; required for mitochondrial genome maintenance; detected in highly purified mitochondria in high-throughput studies; null mutant has decreased levels of cardiolipin and phosphatidylethanolamine
	CAGL0M09537g	-1.91254785186268		Ortholog(s) have mitochondrial inner membrane localization	C2_05170W		Ortholog(s) have mitochondrial inner membrane localization	YBL095W	YBL095W		Mitochondrial inner membrane protein; binds to the 5' UTR of the COX3 mRNA to activate its translation together with Pet122p and Pet494p; also binds to the COX1 Group I intron AI5 beta to facilitate exon ligation during splicing
	CAGL0C02739g	-1.79069708469497		Ortholog(s) have role in mitochondrion organization, phospholipid homeostasis and integral component of mitochondrial outer membrane localization	C1_09060C		Protein of unknown function; possibly membrane bound; mutants are viable; rat catheter biofilm repressed	YAL008W	FUN14	MCP3	Putative regulator of the Fps1p glycerol channel; multiply phosphorylated by Hog1p under osmotic stress; contains a pleckstrin homology domain; forms homodimers and heterodimerizes with paralog Ask10p; green fluorescent protein (GFP)-fusion protein localizes to the cytoplasm
	CAGL0I07007g	-1.46899870801551		Ortholog(s) have role in mitochondrion organization, mitochondrion-ER tethering, phospholipid transport and ERMES complex localization	C1_06230C	MDM34	Putative zinc finger transcription factor; macrophage-downregulated; flow model biofilm induced; flow model and Spider biofilm induced	YGL219C	MDM34	ERMES complex subunit MDM34|MMM2	Protoporphyrinogen oxidase; a mitochondrial enzyme that catalyzes the seventh step in the heme biosynthetic pathway, converting protoporphyrinogen IX to protoporphyrin IX; inhibited by diphenyl ether-type herbicides
	CAGL0L12320g	-1.16542148761758		Ortholog(s) have role in mitochondrial genome maintenance and mitochondrion localization				YLR091W	GEP5	RRG5	Protein with similarity to ABC transporter family members; lacks predicted membrane-spanning regions; transcriptionally activated by Yrm1p along with genes involved in multidrug resistance
	CAGL0B02123g	-1.11612769341136		Ortholog(s) have RNA binding, translation regulator activity and role in Group I intron splicing, mitochondrial respiratory chain complex IV biogenesis, positive regulation of mitochondrial translation	C4_05360C		Ortholog(s) have RNA binding, translation regulator activity and role in Group I intron splicing, mitochondrial respiratory chain complex IV biogenesis, positive regulation of mitochondrial translation	YGR222W	PET54		Integral inner mitochondrial membrane protein; role in maintaining mitochondrial nucleoid structure and number; mutants exhibit an increased rate of mitochondrial DNA escape; shows some sequence similarity to exonucleases
	CAGL0G05093g	-1.02186120746911		Ortholog(s) have mitochondrion localization	C1_13910C	MODF	Ortholog(s) have mitochondrion localization	YDR061W	YDR061W		Protein of unknown function; null mutant lacks mitochondrial DNA and cannot grow on glycerol; the authentic, non-tagged protein is detected in highly purified mitochondria in high-throughput studies
	CAGL0M13761g	1.34132679792347		Ortholog(s) have role in mitochondrial genome maintenance and integral component of mitochondrial inner membrane localization	CR_03620C		Ortholog(s) have role in mitochondrial genome maintenance and integral component of mitochondrial inner membrane localization	YMR302C	YME2	PRP12|RNA12	Component of the MICOS complex; MICOS (formerly MINOS or MitOS) is a mitochondrial inner membrane complex that extends into the intermembrane space and has a role in the maintenance of crista junctions, inner membrane architecture, and formation of contact sites to the outer membrane; Mic19p is peripheral to the inner membrane and may connect Mic60p with the Mic10p-Mic12p-Mic27p subcomplex; both …
	CAGL0K04829g	1.53711371362337		Ortholog(s) have role in mitochondrial genome maintenance and mitochondrion localization	C2_09920W		Ortholog(s) have role in mitochondrial genome maintenance and mitochondrion localization	YNL213C	RRG9
	CAGL0K10516g	2.10706073289793		Ortholog(s) have role in cristae formation and MICOS complex, mitochondrial crista junction localization	C1_00450C		Mitochondrial protein; component of the mitochondrial inner membrane organizing system ; role in maintenance of crista junctions and inner membrane architecture; Spider biofilm repressed	YFR011C	MIC19	AIM13|MCS19	Putative transmembrane protein involved in export of ammonia; ammonia is a starvation signal that promotes cell death in aging colonies; phosphorylated in mitochondria; member of the TC 9.B.33 YaaH family; homolog of Y. lipolytica Gpr1p; ATO2 has a paralog, ADY2, that arose from the whole genome duplication
Nitrogen metabolism	CAGL0M03465g	-3.29581522029449		Ortholog(s) have acetate transmembrane transporter activity, ammonium transmembrane transporter activity and role in ammonium transport, nitrogen utilization, plasma membrane acetate transport	C2_06680W	FRP3	Putative ammonium transporter; upregulated in the presence of human neutrophils; fluconazole-downregulated; repressed by nitric oxide; Spider biofilm induced; rat catheter biofilm repressed	YNR002C	ATO2	putative ammonium permease ATO2|FUN34	Transcriptional activator of nitrogen catabolite repression genes; contains a GATA-1-type zinc finger DNA-binding motif; activity and localization regulated by nitrogen limitation and Ure2p; different translational starts produce two major and two minor isoforms that are differentially regulated and localized
	CAGL0I00902g	-2.15197595541665		Has domain(s) with predicted sequence-specific DNA binding, transcription factor activity, sequence-specific DNA binding, zinc ion binding activity and role in regulation of transcription, DNA-templated	C2_02530W		Has domain(s) with predicted sequence-specific DNA binding, transcription factor activity, sequence-specific DNA binding, zinc ion binding activity and role in regulation of transcription, DNA-templated	YMR136W	GAT2		Negative regulator of genes in multiple nitrogen degradation pathways; expression is regulated by nitrogen levels and by Gln3p; member of the GATA-binding family, forms homodimers and heterodimers with Gzf3p; DAL80 has a paralog, GZF3, that arose from the whole genome duplication
	CAGL0K07634g	-1.67746535198389	GAT1	Ortholog(s) have sequence-specific DNA binding, transcription factor activity, RNA polymerase II transcription factor binding and transcriptional activator activity, more	C4_05880W	GAT1	GATA-type transcription factor; regulator of nitrogen utilization; required for nitrogen catabolite repression and utilization of isoleucine, tyrosine and tryptophan N sources; required for virulence in a mouse systemic infection model	YFL021W	GAT1	MEP80|NIL1	Ammonium permease involved in regulation of pseudohyphal growth; belongs to a ubiquitous family of cytoplasmic membrane proteins that transport only ammonium (NH4+); expression is under the nitrogen catabolite repression regulation
	CAGL0L03157g	-1.62295682422831		Ortholog(s) have RNA polymerase II transcription factor activity, sequence-specific DNA binding, sequence-specific DNA binding activity				YKR034W	DAL80	UGA43
	CAGL0J06028g	-1.56223956390867	MEP2	Ortholog(s) have high-affinity secondary active ammonium transmembrane transporter activity, methylammonium transmembrane transporter activity	C4_00430W	MEP2	Ammonium permease and regulator of nitrogen starvation-induced filamentation; 11 predicted transmembrane regions; in low nitrogen cytoplasmic C-terminus activates Ras/cAMP and MAPK signal transduction pathways to induce filamentation	YNL142W	MEP2	ammonium permease MEP2	Plasma membrane protein, putative ammonium transporter; regulation pattern suggests a possible role in export of ammonia from the cell; phosphorylated in mitochondria; member of the TC 9.B.33 YaaH family of putative transporters
	CAGL0I08613g	-1.43814011009486	DUR3	Putative plasma membrane polyamine transporter							Plasma membrane transporter for both urea and polyamines; expression is highly sensitive to nitrogen catabolite repression and induced by allophanate, the last intermediate of the allantoin degradative pathway
	CAGL0A03212g	-1.3914478616241		Ortholog(s) have ammonium transmembrane transporter activity, role in ammonium transport, nitrogen utilization, transmembrane transport and mitochondrion, plasma membrane localization				YDR384C	ATO3	putative ammonium permease ATO3	Ammonium permease; belongs to a ubiquitous family of cytoplasmic membrane proteins that transport only ammonium (NH4+); expression is under the nitrogen catabolite repression regulation; human homolog RHCG complements yeast null mutant; mutations in human homolog RHCG implicated in metabolic acidosis; MEP1 has a paralog, MEP3, that arose from the whole genome duplication
	CAGL0K03157g	-1.2838194469034	DUR31	Putative plasma membrane polyamine transporter	C1_04650W	DUR3	High affinity spermidine transporter; expression is induced by urea; fungal-specific (no human or murine homolog); not required for virulence in a mouse intravenous model	YHL016C	DUR3		Adenylosuccinate synthase; catalyzes the first step in synthesis of adenosine monophosphate from inosine 5'monophosphate during purine nucleotide biosynthesis; exhibits binding to single-stranded autonomously replicating (ARS) core sequence
	CAGL0I10747g	-1.17045549751926		Ortholog(s) have ammonium transmembrane transporter activity, role in ammonium transport, nitrogen utilization and endoplasmic reticulum localization				YGR121C	MEP1	ammonium permease MEP1|AMT1
	CAGL0K05027g	1.94058904304908		Ortholog(s) have DNA replication origin binding, adenylosuccinate synthase activity, sulfinylpropanyl adenylate synthase activity and role in 'de novo' AMP biosynthetic process, cellular response to cadmium ion, fumarate metabolic process	C1_09640W	ADE12	Adenylosuccinate synthase; upregulated in biofilm; decreased expression in hyphae vs yeast-form cells; not induced during GCN response, in contrast to S. cerevisiae ADE12, which is induced by Gcn4p; stationary phase-enriched protein	YNL220W	ADE12	adenylosuccinate synthase|BRA9	Protein involved in resistance to nitrosoguanidine and 6-azauracil; expression is regulated by transcription factors involved in multidrug resistance; SNG1 has a paralog, YJR015W, that arose from the whole genome duplication
Nucleotide metabolism	CAGL0G09273g	-2.79765921164395		Putative transporter involved in nitrosoguanidine resistance; gene is downregulated in azole-resistant strain	C3_03110W		Ortholog(s) have role in nucleobase-containing compound transport, regulation of fungal-type cell wall organization, regulation of phospholipid translocation and fungal-type vacuole, plasma membrane localization	YGR197C	SNG1
	CAGL0B00550g	-1.48198067744002		Ortholog(s) have bis(5'-nucleosyl)-tetraphosphatase activity, sulfate adenylyltransferase (ADP) activity, role in nucleoside catabolic process, nucleotide biosynthetic process and cytoplasm, nucleus localization				YCL050C	APA1	bifunctional AP-4-A phosphorylase/ADP sulfurylase|DTP1	Thymidylate and uridylate kinase; functions in de novo biosynthesis of pyrimidine deoxyribonucleotides; converts dTMP to dTDP and dUMP to dUTP; essential for mitotic and meiotic DNA replication; homologous to S. pombe tmp1; human homolog DTYMK can complement yeast cdc8 null mutant
	CAGL0L00671g	-1.20233023613061	FCY21	Purine-cytosine transporter							Thymidylate synthase; required for de novo biosynthesis of pyrimidine deoxyribonucleotides; expression is induced at G1/S; human homolog TYMSOS can complement yeast cdc21 temperature-sensitive mutant at restrictive temperature
	CAGL0H01881g	-1.08613095801621		Ortholog(s) have thymidylate kinase activity, uridylate kinase activity, role in dTDP biosynthetic process, dTTP biosynthetic process, dUDP biosynthetic process and cytosol, nucleus localization	C1_11790W		Ortholog(s) have thymidylate kinase activity, uridylate kinase activity, role in dTDP biosynthetic process, dTTP biosynthetic process, dUDP biosynthetic process and cytosol, nucleus localization	YJR057W	CDC8	bifunctional thymidylate/uridylate kinase
	CAGL0K05467g	1.54676423974093	CDC21	Putative thymidylate synthase	C2_05190W	CDC21	Putative thymidylate synthase; flucytosine induced; rat catheter biofilm repressed; Spider biofilm repressed	YOR074C	CDC21	thymidylate synthase|YOR29-25|TMP1|CRT9	Imidazoleglycerol-phosphate dehydratase; catalyzes the sixth step in histidine biosynthesis; mutations cause histidine auxotrophy and sensitivity to Cu, Co, and Ni salts; transcription is regulated by general amino acid control via Gcn4p
Amino acid metabolism	CAGL0L02937g	-4.79693647259894	HIS3	Putative imidazoleglycerol-phosphate dehydratase	C2_04810W	HIS3	Imidazoleglycerol-phosphate dehydratase, enzyme of histidine biosynthesis; functionally complements S. cerevisiae his3-1 mutation; hyphal-induced expression; regulated by Gcn2p and Gcn4p; fungal-specific (no human or murine homolog)	YOR202W	HIS3	imidazoleglycerol-phosphate dehydratase HIS3|HIS8|HIS10	Zinc-finger DNA-binding transcription factor; involved in transcriptional regulation of the methionine biosynthetic genes; targets strong transcriptional activator Met4p to promoters of sulfur metabolic genes; feedforward loop exists in the regulation of genes controlled by Met4p and Met32p; lack of such a loop for MET31 may account for the differential actions of Met32p and Met31p; MET32 has a p…
	CAGL0A03102g	-2.51392696285814	ARO10	Ortholog(s) have phenylpyruvate decarboxylase activity	CR_06860C	ARO10	Aromatic decarboxylase; Ehrlich fusel oil pathway of aromatic alcohol biosynthesis; alkaline repressed; protein abundance affected by URA3 expression in CAI-4 strain; Spider biofilm induced	YDR380W	ARO10	phenylpyruvate decarboxylase ARO10	bZIP transcriptional activator in the Cbf1p-Met4p-Met28p complex; participates in the regulation of sulfur metabolism
	CAGL0B02651g	-2.34804506994602		Ortholog(s) have RNA polymerase II activating transcription factor binding, RNA polymerase II transcription factor activity and sequence-specific transcription regulatory region DNA binding, more	C2_10230W		Putative C2H2 transcription factor; expression upregulated in clinical isolates from HIV+ patients with oral candidiasis; Spider biofilm induced	YDR253C	MET32
	CAGL0K08668g	-2.34338577638722	MET28	bZIP domain-containing protein	C7_00730W	MET28	Predicted bZIP domain-containing transcription factor; protein induced during the mating process; possibly essential, disruptants not obtained by UAU1 method; Hap43-repressed; rat catheter biofilm induced	YIR017C	MET28		Mitochondrial ornithine acetyltransferase; catalyzes the fifth step in arginine biosynthesis; also possesses acetylglutamate synthase activity, regenerates acetylglutamate while forming ornithine
	CAGL0M00154g	-2.33916684955559	CYN1	Plasma membrane high affinity cystine specific transporter; present only in pathogenic yeasts; confers the ability to utilize cystine as a sulfur source							General amino acid permease; Gap1p senses the presence of amino acid substrates to regulate localization to the plasma membrane when needed; essential for invasive growth
	CAGL0F06501g	-2.29205810358157		Ortholog(s) have acetyl-CoA:L-glutamate N-acetyltransferase activity, glutamate N-acetyltransferase activity, role in ornithine biosynthetic process and mitochondrial matrix localization	C7_02150C	ECM42	Ornithine acetyltransferase; Gcn2, Gcn4-regulated; clade-specific gene expression; possibly essential gene, disruptants not obtained by UAU1 method; Spider biofilm induced	YMR062C	ARG7	glutamate N-acetyltransferase|ECM40
	CAGL0L03267g	-2.26683394271174	GAP1	Ortholog(s) have L-proline transmembrane transporter activity, polyamine transmembrane transporter activity and role in amino acid transmembrane transport, polyamine transport, regulation of nitrogen utilization	C3_05580C	GAP2	General broad specificity amino acid permease; ketoconazole, flucytosine repressed; Ssy1-dependent histidine induction; regulated by Nrg1, Tup1; colony morphology-related gene regulation by Ssn6; Spider and flow model biofilm induced	YKR039W	GAP1	amino acid permease GAP1	Large subunit of carbamoyl phosphate synthetase; carbamoyl phosphate synthetase catalyzes a step in the synthesis of citrulline, an arginine precursor
	CAGL0I10791g	-2.10594041738229		Ortholog(s) have ornithine carbamoyltransferase activity, role in arginine biosynthetic process via ornithine, asexual sporulation and mitochondrial matrix localization							Adenylylsulfate kinase; required for sulfate assimilation and involved in methionine metabolism; human homolog PAPSS2 complements yeast null mutant
	CAGL0C04917g	-2.06227641330457		Ortholog(s) have carbamoyl-phosphate synthase (glutamine-hydrolyzing) activity, role in arginine biosynthetic process and carbamoyl-phosphate synthase complex, mitochondrion localization	CR_01330W	CPA2	Putative arginine-specific carbamoylphosphate synthetase; protein enriched in stationary phase yeast cultures; rat catheter biofilm induced; Spider biofilm induced	YJR109C	CPA2	carbamoyl-phosphate synthase (glutamine-hydrolyzing) CPA2	Dicarboxylic amino acid permease; mediates high-affinity and high-capacity transport of L-glutamate and L-aspartate; also a transporter for Gln, Asn, Ser, Ala, and Gly; relocalizes from plasma membrane to vacuole upon DNA replication stress
	CAGL0L02321g	-1.84231472614158		Ortholog(s) have adenylylsulfate kinase activity, role in sulfate assimilation, phosphoadenylyl sulfate reduction by phosphoadenylyl-sulfate reductase (thioredoxin), sulfur amino acid metabolic process and cytosol, nucleus localization	C5_00430W	MET14	Putative adenylylsulfate kinase; predicted role in sulfur metabolism; possibly adherence-induced; protein present in exponential and stationary growth phase yeast; F-12/CO2 biofilm induced	YKL001C	MET14	adenylyl-sulfate kinase	Small subunit of carbamoyl phosphate synthetase; carbamoyl phosphate synthetase catalyzes a step in the synthesis of citrulline, an arginine precursor; translationally regulated by an attenuator peptide encoded by YOR302W within the CPA1 mRNA 5'-leader
	CAGL0A01199g	-1.82634794257077	DIP5	Putative dicarboxylic amino acid permease	C1_02530C	DIP5	Dicarboxylic amino acid permease; mutation confers hypersensitivity to toxic ergosterol analog; induced upon phagocytosis by macrophage; Gcn4-regulated; upregulated by Rim101 at pH 8; rat catheter and Spider biofilm induced	YPL265W	DIP5		Alanine transaminase (glutamic pyruvic transaminase); involved in alanine biosynthesis and catabolism; TOR1-independent role in determining chronological lifespan; expression is induced in the presence of alanine; repression is mediated by Nrg1p; ALT1 has a paralog, ALT2, that arose from the whole genome duplication; Alt2p is catalytically inactive
	CAGL0I09592g	-1.80718569151465		Ortholog(s) have carbamoyl-phosphate synthase (glutamine-hydrolyzing) activity, role in arginine biosynthetic process and carbamoyl-phosphate synthase complex, cytoplasmic stress granule localization	C4_01550C	CPA1	Putative carbamoyl-phosphate synthase subunit; alkaline repressed; rat catheter, Spider and flow model biofilm induced	YOR303W	CPA1	carbamoyl-phosphate synthase (glutamine-hydrolyzing) CPA1	Acetylornithine aminotransferase; catalyzes the fourth step in the biosynthesis of the arginine precursor ornithine
	CAGL0L12254g	-1.76563768960278		Ortholog(s) have L-alanine:2-oxoglutarate aminotransferase activity, role in alanine biosynthetic process, alanine catabolic process, cellular response to drug, chronological cell aging and cytosol, mitochondrion, nucleus localization	C3_03480C	ALT1	Putative alanine transaminase; mutation confers hypersensitivity to 5-fluorocytosine (5-FC); rat catheter and flow model biofilm induced	YLR089C	ALT1	alanine transaminase ALT1	NAD(+)-dependent glutamate synthase (GOGAT); synthesizes glutamate from glutamine and alpha-ketoglutarate; with Gln1p, forms the secondary pathway for glutamate biosynthesis from ammonia; expression regulated by nitrogen source; assembles into filaments as cells approach stationary phase and under cytosolic acidification and starvation conditions
	CAGL0B01507g	-1.75464446295674	ARG8	Ortholog(s) have N2-acetyl-L-ornithine:2-oxoglutarate 5-aminotransferase activity, role in arginine biosynthetic process and mitochondrial matrix, nucleus localization	C4_05070C	ARG8	Putative acetylornithine aminotransferase; Gcn2, Gcn4 regulated; rat catheter biofilm induced; Spider biofilm induced	YOL140W	ARG8	acetylornithine transaminase	S-adenosyl-L-methionine uroporphyrinogen III transmethylase; involved in the biosynthesis of siroheme, a prosthetic group used by sulfite reductase; required for sulfate assimilation and methionine biosynthesis
	CAGL0L01089g	-1.73865941213764	GLT1	Ortholog(s) have glutamate synthase (NADH) activity, role in glutamate biosynthetic process and cytosol, mitochondrion localization	C1_06550W	GLT1	Putative glutamate synthase; regulated by Sef1, Sfu1, and Hap43; rat catheter biofilm repressed	YDL171C	GLT1	glutamate synthase (NADH)	Arginine transporter; expression is normally very low and it is unclear what conditions would induce significant expression; ALP1 has a paralog, CAN1, that arose from the whole genome duplication
	CAGL0G01903g	-1.65325142548167	MET1	Ortholog(s) have uroporphyrin-III C-methyltransferase activity, role in cellular response to drug, methionine biosynthetic process, siroheme biosynthetic process and nucleus localization	C2_02940W	MET1	Putative uroporphyrin-3 C-methyltransferase, methionine biosynthesis enzyme; upregulated by human whole blood or polymorphonuclear (PMN) cells; Hog1p-induced; fungal-specific (no human or murine homolog); Hap43p-repressed	YKR069W	MET1	uroporphyrinogen-III C-methyltransferase|MET20	Protein involved in cystine transport; localizes to the vacuole, plasma membrane and endosome; similarity to human cystinosin, a H(+)-driven transporter involved in L-cystine export from lysosomes and implicated in the disease cystinosis; contains seven transmembrane domains; mutation is functionally complemented by human CTNS
	CAGL0J08184g	-1.57252397447026		Ortholog(s) have basic amino acid transmembrane transporter activity, role in basic amino acid transport and endoplasmic reticulum localization				YNL270C	ALP1	arginine permease ALP1|APL1	Acetylglutamate kinase and N-acetyl-gamma-glutamyl-phosphate reductase; N-acetyl-L-glutamate kinase (NAGK) catalyzes the 2nd and N-acetyl-gamma-glutamyl-phosphate reductase (NAGSA), the 3rd step in arginine biosynthesis; synthesized as a precursor which is processed in the mitochondrion to yield mature NAGK and NAGSA; enzymes form a metabolon complex with Arg2p; NAGK C-terminal domain stabilizes …
	CAGL0M06985g	-1.55908516502074		Ortholog(s) have L-cystine transmembrane transporter activity, role in L-cystine transport and endosome, fungal-type vacuole, plasma membrane localization				YCR075C	ERS1	cystinosin-like protein ERS1	3'-phosphoadenylsulfate reductase; reduces 3'-phosphoadenylyl sulfate to adenosine-3',5'-bisphosphate and free sulfite using reduced thioredoxin as cosubstrate, involved in sulfate assimilation and methionine metabolism
	CAGL0G03619g	-1.54932228474909		Ortholog(s) have L-arginine transmembrane transporter activity, L-aspartate transmembrane transporter activity and L-glutamate transmembrane transporter activity, more	C6_04110W		Ortholog(s) have L-arginine transmembrane transporter activity, L-aspartate transmembrane transporter activity and L-glutamate transmembrane transporter activity, more	YER119C	AVT6	aspartate/glutamate transporter
	CAGL0J03124g	-1.4715769865622		Ortholog(s) have N-acetyl-gamma-glutamyl-phosphate reductase activity, acetylglutamate kinase activity, role in arginine biosynthetic process, regulation of transcription, DNA-templated and mitochondrial matrix localization	C1_09290C	ARG5,6	Arginine biosynthetic enzyme; processed in S. cerevisiae into 2 polypeptides with acetylglutamate kinase (Arg6) activity and acetylglutamate-phosphate reductase (Arg5) activity; Gcn4 regulated; alkaline repressed; Spider biofilm induced	YER069W	ARG5,6	argC|argB|bifunctional acetylglutamate kinase/N-acetyl-gamma-glutamyl-phosphate reductase	Protein required for the ATP-dependent transport of arginine; vacuolar membrane protein; involved in the ATP-dependent transport of arginine into the vacuole and possibly in balancing ion homeostasis; human homolog CLN3 involved in Batten disease (juvenile onset neuronal ceroid lipofuscinosis) can complement yeast null mutant
	CAGL0I08503g	-1.46104636273517		Ortholog(s) have phosphoadenylyl-sulfate reductase (thioredoxin) activity and role in cellular response to drug, sulfate assimilation, phosphoadenylyl sulfate reduction by phosphoadenylyl-sulfate reductase (thioredoxin)	C4_07030W	MET16	Putative 3'-phosphoadenylsulfate reductase; sulfur amino acid metabolism; reports differ on regulation during biofilm formation; fungal-specific; possibly an essential gene, disruptants not obtained by UAU1 method; Hap43p-repressed gene	YPR167C	MET16	phosphoadenylyl-sulfate reductase (thioredoxin)	Proline permease; required for high-affinity transport of proline; also transports the toxic proline analog azetidine-2-carboxylate (AzC); PUT4 transcription is repressed in ammonia-grown cells
	CAGL0J05104g	-1.42443728498986		Ortholog(s) have role in actin cortical patch localization, arginine transport, endocytosis, late endosome to vacuole transport, lysine transport, regulation of intracellular pH	C1_05120W		Ortholog(s) have role in actin cortical patch localization, arginine transport, endocytosis, late endosome to vacuole transport, lysine transport, regulation of intracellular pH	YJL059W	YHC3	amino acid transporter YHC3|BTN1	Component of the SPS plasma membrane amino acid sensor system; senses external amino acid concentration and transmits intracellular signals that result in regulation of expression of amino acid permease genes; other members are Ssy1p, Ptr3p, and Ssy5p
	CAGL0E05632g	-1.38726173831284		Ortholog(s) have L-proline transmembrane transporter activity, role in gamma-aminobutyric acid transport, proline transport and Golgi apparatus, endoplasmic reticulum localization				YOR348C	PUT4	proline permease PUT4	L-homoserine-O-acetyltransferase; catalyzes the conversion of homoserine to O-acetyl homoserine which is the first step of the methionine biosynthetic pathway
	CAGL0E01089g	-1.3733174559119		Ortholog(s) have role in adaptation to pheromone involved in conjugation with mutual genetic exchange, amino acid transmembrane transport and cellular response to biotic stimulus, more	C2_04060C	SSY1	Amino acid sensor; required for wild-type hyphal growth on solid serum or Lees media, not under all conditions; 12 predicted membrane spanning regions; Hap43-repressed; Spider biofilm induced	YDR160W	SSY1	RAA1|SHR10	Putative vacuolar membrane transporter for cationic amino acids; likely contributes to amino acid homeostasis by exporting cationic amino acids from the vacuole; member of the PQ-loop family, with seven transmembrane domains; mutant phenotype is functionally complemented by rat PQLC2 vacuolar transporter
	CAGL0J08316g	-1.3035171194449		Ortholog(s) have homoserine O-acetyltransferase activity, role in homoserine metabolic process, methionine biosynthetic process, regulation of DNA methylation and cytosol localization	CR_02170W	MET2	Homoserine acetyltransferase; Hap43p-, Gcn4p-regulated; macrophage/pseudohyphal-repressed; not highly biofilm induced, in contrast to many sulfur amino acid metabolic genes; no human or murine homolog; virulence-group-correlated expression	YNL277W	MET2	homoserine O-acetyltransferase	Aromatic aminotransferase II; catalyzes the first step of tryptophan, phenylalanine, and tyrosine catabolism
	CAGL0A02508g	-1.27143150979234		Ortholog(s) have basic amino acid transmembrane transporter activity, role in basic amino acid transmembrane export from vacuole and integral component of fungal-type vacuolar membrane localization	C3_03690W		Putative vacuolar membrane transporter for cationic amino acids; Spider biofilm induced	YDR352W	YPQ2		Cystathionine gamma-synthase, converts cysteine into cystathionine; STR2 has a paralog, YML082W, that arose from the whole genome duplication
	CAGL0G06028g	-1.26496625645874	ARO9	Putative aromatic aminotransferase II	C4_05560C	ARO9	Aromatic transaminase; Ehrlich fusel oil pathway of aromatic alcohol biosynthesis; Rim101-dependent pH-regulation (alkaline induced); Hap43-induced gene	YHR137W	ARO9	aromatic-amino-acid:2-oxoglutarate transaminase	NADP(+)-dependent glutamate dehydrogenase; synthesizes glutamate from ammonia and alpha-ketoglutarate; rate of alpha-ketoglutarate utilization differs from Gdh1p; expression regulated by nitrogen and carbon sources; GDH3 has a paralog, GDH1, that arose from the whole genome duplication
	CAGL0M00550g	-1.18911574556931		Ortholog(s) have cystathionine gamma-synthase activity, role in transsulfuration and cytosol, nucleus localization	C1_03760C	STR2	Ortholog(s) have cystathionine gamma-synthase activity, role in transsulfuration and cytosol, nucleus localization	YJR130C	STR2	cystathionine gamma-synthase	Transcription factor; activated by proteolytic processing in response to signals from the SPS sensor system for external amino acids; activates transcription of amino acid permease genes; STP2 has a paralog, STP1, that arose from the whole genome duplication
	CAGL0D00176g	-1.14838515473472		Ortholog(s) have glutamate dehydrogenase (NADP+) activity, role in glutamate biosynthetic process and cytosol, extracellular region, mitochondrion, nucleus localization	C4_06120W	GDH3	NADP-glutamate dehydrogenase; Nrg1, Plc1 regulated; hypha, hypoxia, Efg1-repressed; Rim101-induced at pH 8; GlcNAc, ciclopirox, ketoconazole induced; exp and stationary phase protein; Spider biofilm repressed; rat catheter biofilm induced	YAL062W	GDH3	glutamate dehydrogenase (NADP(+)) GDH3|FUN51	Mitochondrial aspartate aminotransferase; catalyzes the conversion of oxaloacetate to aspartate in aspartate and asparagine biosynthesis
	CAGL0E04312g	-1.13463048988393		Ortholog(s) have RNA polymerase II core promoter proximal region sequence-specific DNA binding, transcriptional activator activity, RNA polymerase II core promoter proximal region sequence-specific binding activity	C1_13350W	STP2	Amino-acid-regulated transcription factor; activates transcription of amino acid permease genes; activated by amino-acid-induced proteolytic processing (Ssy1, Csh3 dependent); required for alkalinization of medium; Spider biofilm induced	YHR006W	STP2		Cytosolic L-asparaginase, involved in asparagine catabolism; catalyzes hydrolysis of L-asparagine to aspartic acid and ammonia; important enzyme for the treatment of acute lymphoblastic leukemia; has low glutaminase activity and dependence; synthesized constitutively
	CAGL0K08580g	-1.11487073824564		Ortholog(s) have role in chronological cell aging, replicative cell aging and mitochondrion localization	C2_05250C	AAT1	Aspartate aminotransferase; soluble protein in hyphae; macrophage-induced protein; alkaline upregulated; amphotericin B repressed; gene used for strain identification by multilocus sequence typing; farnesol-, Hap43p-induced; GlcNAc-induced	YKL106W	AAT1	aspartate transaminase AAT1	Saccharopine dehydrogenase (NAD+, L-lysine-forming); catalyzes the conversion of saccharopine to L-lysine, which is the final step in the lysine biosynthesis pathway; also has mRNA binding activity
	CAGL0H07051g	-1.11182045522609		Ortholog(s) have asparaginase activity, role in asparagine catabolic process and Golgi apparatus localization	CR_10170C		Putative asparaginase; predicted role in asparagine catabolism; Spider biofilm induced	YDR321W	ASP1	asparaginase ASP1	Acireductone dioxygenease involved in methionine salvage pathway; transcribed as polycistronic mRNA with YMR010W and regulated post-transcriptionally by RNase III (Rnt1p) cleavage; ADI1 mRNA is induced in heat shock conditions; human ortholog ADI1 can complement yeast adi1 mutant
	CAGL0F06875g	-1.09931061417226		Ortholog(s) have mRNA binding, saccharopine dehydrogenase (NAD+, L-lysine-forming) activity, role in lysine biosynthetic process via aminoadipic acid and cytoplasm localization	C4_05320W	LYS1	Saccharopine dehydrogenase (biosynthetic); enzyme of alpha-aminoadipate lysine biosynthesis pathway; functionally complements S. cerevisiae lys1 mutation; fungal-specific (no human or murine homolog)	YIR034C	LYS1	saccharopine dehydrogenase (NAD+, L-lysine-forming)	Proline oxidase; nuclear-encoded mitochondrial protein involved in utilization of proline as sole nitrogen source; PUT1 transcription is induced by Put3p in the presence of proline and the absence of a preferred nitrogen source
	CAGL0K08800g	-1.09019468306553	ADI1	Ortholog(s) have acireductone dioxygenase (Ni2+-requiring) activity, role in L-methionine salvage from methylthioadenosine and cytosol, nucleus localization	C1_11100W		Ortholog(s) have acireductone dioxygenase (Ni2+-requiring) activity, role in L-methionine salvage from methylthioadenosine and cytosol, nucleus localization	YMR009W	ADI1	acireductone dioxygenase (Ni2+-requiring)	3-phosphoserine aminotransferase; catalyzes the formation of phosphoserine from 3-phosphohydroxypyruvate, required for serine and glycine biosynthesis; regulated by the general control of amino acid biosynthesis mediated by Gcn4p; protein abundance increases in response to DNA replication stress
	CAGL0M04499g	-1.08902676302378		Ortholog(s) have proline dehydrogenase activity, role in proline catabolic process to glutamate and mitochondrion localization	C5_02600W	PUT1	Putative proline oxidase; alkaline upregulated by Rim101; flow model biofilm induced; Spider biofilm induced	YLR142W	PUT1	proline dehydrogenase	Folylpolyglutamate synthetase; catalyzes extension of the glutamate chains of the folate coenzymes, required for methionine synthesis and for maintenance of mitochondrial DNA; protein abundance increases in response to DNA replication stress
	CAGL0G09691g	-1.07357944355666		Ortholog(s) have O-phospho-L-serine:2-oxoglutarate aminotransferase activity, role in L-serine biosynthetic process, purine nucleobase biosynthetic process and cytosol localization	C2_06210C	SER1	Putative 3-phosphoserine aminotransferase; predicted role in serine and glycine biosynthesis; protein present in exponential and stationary yeast growth phases; Spider biofilm repressed	YOR184W	SER1	O-phospho-L-serine:2-oxoglutarate transaminase|ADE9	Alpha-isopropylmalate synthase II (2-isopropylmalate synthase); catalyzes the first step in the leucine biosynthesis pathway; the minor isozyme, responsible for the residual alpha-IPMS activity detected in a leu4 null mutant; LEU9 has a paralog, LEU4, that arose from the whole genome duplication
	CAGL0J03762g	-1.05878635506489	MET7	Ortholog(s) have tetrahydrofolylpolyglutamate synthase activity, role in one-carbon metabolic process, regulation of DNA methylation and cytosol, endoplasmic reticulum, mitochondrion, nucleus localization	C2_04380C		Ortholog(s) have tetrahydrofolylpolyglutamate synthase activity, role in one-carbon metabolic process, regulation of DNA methylation and cytosol, endoplasmic reticulum, mitochondrion, nucleus localization	YOR241W	MET7	tetrahydrofolate synthase|MET23	Zinc-knuckle transcription factor, repressor and activator; regulates genes involved in branched chain amino acid biosynthesis and ammonia assimilation; acts as a repressor in leucine-replete conditions and as an activator in the presence of alpha-isopropylmalate, an intermediate in leucine biosynthesis that accumulates during leucine starvation
	CAGL0G06732g	-1.05513758549045		Ortholog(s) have 2-isopropylmalate synthase activity, role in leucine biosynthetic process and mitochondrion localization				YOR108W	LEU9	2-isopropylmalate synthase LEU9	Histidinolphosphatase; catalyzes the eighth step in histidine biosynthesis; mutations cause histidine auxotrophy and sensitivity to Cu, Co, and Ni salts; transcription is regulated by general amino acid control
	CAGL0H00396g	-1.04176631412839		Ortholog(s) have sequence-specific DNA binding, transcriptional activator activity, RNA polymerase II core promoter proximal region sequence-specific binding and transcriptional repressor activity, more	C5_02180C	LEU3	Zn(II)2Cys6 transcription factor; predicted regulator branched-c ofhain amino acid biosynthesis genes; alkaline induced; induced by Mnl1 under weak acid stress; required for yeast cell adherence to silicone substrate; Spider biofilm induced	YLR451W	LEU3	leucine-responsive transcriptional regulator LEU3	Permease of basic amino acids in the vacuolar membrane
	CAGL0I09009g	-1.02996523031827		Ortholog(s) have histidinol-phosphatase activity, role in histidine biosynthetic process and cytosol, nucleus localization	C7_03650W		Ortholog(s) have histidinol-phosphatase activity, role in histidine biosynthetic process and cytosol, nucleus localization	YFR025C	HIS2	histidinol-phosphatase	Dihydrofolate reductase involved in tetrahydrofolate biosynthesis; required for respiratory metabolism; mutation is functionally complemented by human DHFR
	CAGL0J01375g	-1.00186058661618		Ortholog(s) have L-asparagine transmembrane transporter activity, L-isoleucine transmembrane transporter activity, L-lysine transmembrane transporter activity	C4_03700W		Predicted membrane transporter, member of the drug:proton antiporter (14 spanner) (DHA2) family, major facilitator superfamily (MFS)	YMR088C	VBA1		NAD-dependent arabinose dehydrogenase; involved in biosynthesis of dehydro-D-arabinono-1,4-lactone; similar to plant L-galactose dehydrogenase
	CAGL0J03894g	1.04586377864284		Ortholog(s) have dihydrofolate reductase activity, drug binding, mRNA binding activity, role in dihydrofolate metabolic process, tetrahydrofolate biosynthetic process and mitochondrion localization	C7_03130C	DFR1	Trimethoprim resistant dihydrofolate reductase (DHFR), reduces 7,8-dihydrofolate to 5,4,7,8-tetrahydrofolate; binds NADPH; target of drugs that selectively inhibit the fungal enzyme rather than the human enzyme	YOR236W	DFR1	dihydrofolate reductase	L-ornithine transaminase (OTAse); catalyzes the second step of arginine degradation, expression is dually-regulated by allophanate induction and a specific arginine induction process; not nitrogen catabolite repression sensitive; protein abundance increases in response to DNA replication stress; human homolog OAT complements yeast null mutant
	CAGL0F06061g	1.1643026965498		Ortholog(s) have D-arabinose 1-dehydrogenase [NAD(P)+] activity and role in dehydro-D-arabinono-1,4-lactone biosynthetic process	C4_00380W		Ortholog(s) have D-arabinose 1-dehydrogenase [NAD(P)+] activity and role in dehydro-D-arabinono-1,4-lactone biosynthetic process	YMR041C	ARA2	D-arabinose 1-dehydrogenase (NAD(P)(+)) ARA2	Putative protein with similarity to asparagine synthetases; green fluorescent protein (GFP)-fusion protein localizes to the cytoplasm; YML096W is not an essential gene and partially overlaps the verified gene RAD10
	CAGL0M00880g	1.20650404819323	CAR2	Putative ornithine aminotransferase; protein abundance increased in ace2 mutant cells	C4_00160C	CAR2	Ornithine aminotransferase; arginine metabolism; alkaline induced; mutant sensitivite to toxic ergosterol analog, to amphotericin B; exponential and stationary phase yeast; flow model biofilm induced; rat catheter, Spider biofilm repressed	YLR438W	CAR2	ornithine-oxo-acid transaminase|cargB	Cobalamin-independent methionine synthase; involved in methionine biosynthesis and regeneration; requires a minimum of two glutamates on the methyltetrahydrofolate substrate, similar to bacterial metE homologs
	CAGL0H06963g	1.30356343919738		Ortholog(s) have cytosol, nucleus localization	C2_08530C		Ortholog(s) have cytosol, nucleus localization	YML096W	YML096W	putative asparagine synthase	Cytosolic serine hydroxymethyltransferase; converts serine to glycine plus 5,10 methylenetetrahydrofolate; major isoform involved in generating precursors for purine, pyrimidine, amino acid, and lipid biosynthesis
	CAGL0I04994g	1.46059264921672	MET6	5-methyltetrahydropteroyltriglutamate homocysteine methyltransferase; protein abundance increased in ace2 mutant cells	CR_01620C	MET6	Essential 5-methyltetrahydropteroyltriglutamate-homocysteine methyltransferase (cobalamin-independent methionine synthase); antigenic in murine/human systemic infection; heat shock, estrogen, GCN-induced; Spider biofilm repressed	YER091C	MET6	5-methyltetrahydropteroyltriglutamate-homocysteine S-methyltransferase	Minor isoform of pyruvate decarboxylase; decarboxylates pyruvate to acetaldehyde, involved in amino acid catabolism; transcription is glucose- and ethanol-dependent, and is strongly induced during sulfur limitation
	CAGL0F01749g	1.56925960228797		Putative serine hydroxymethyltransferase; protein differentially expressed in azole resistant strain	C6_03760C	SHM2	Cytoplasmic serine hydroxymethyltransferase; complements glycine auxotrophy of S. cerevisiae shm1 shm2 gly1-1 mutant; antigenic; farnesol-upregulated in biofilm; stationary-phase enriched protein; rat catheter and Spider biofilm repressed	YLR058C	SHM2	glycine hydroxymethyltransferase SHM2|SHMT2
	CAGL0G02937g	1.97134882590335		Ortholog(s) have pyruvate decarboxylase activity and role in L-phenylalanine catabolic process, aromatic amino acid family catabolic process to alcohol via Ehrlich pathway, ethanol metabolic process, tryptophan catabolic process				YGR087C	PDC6	indolepyruvate decarboxylase 6	Arginase, catabolizes arginine to ornithine and urea; expression responds to both induction by arginine and nitrogen catabolite repression; disruption decreases production of carcinogen ethyl carbamate during wine fermentation and also enhances freeze tolerance
	CAGL0J04554g	2.02154255937919		Has domain(s) with predicted catalytic activity, pyridoxal phosphate binding, transaminase activity and role in biosynthetic process, cellular amino acid metabolic process
	CAGL0J07062g	2.26408966780439		Ortholog(s) have arginase activity, manganese ion binding, ornithine carbamoyltransferase inhibitor activity, zinc ion binding activity	C5_04490C	CAR1	Arginase; arginine catabolism; transcript regulated by Nrg1, Mig1, Tup1; colony morphology-related regulation by Ssn6; alkaline induced; protein decreased in stationary phase; sumoylation target; flow model biofilm induced	YPL111W	CAR1	arginase|cargA|LPH15	Protein serine/threonine kinase; required for vesicle formation in autophagy and the cytoplasm-to-vacuole targeting (Cvt) pathway; structurally required for phagophore assembly site formation; during autophagy forms a complex with Atg13p and Atg17p; essential for cell cycle progression from G2/M to G1 under nitrogen starvation
Autophagy	CAGL0L06006g	-2.20934416422099		Ortholog(s) have protein serine/threonine kinase activity	C4_04450C	ATG1	Putative protein serine/threonine kinase; predicted role in vesicle formation in autophagy and the cytoplasm-to-vacuole targeting (Cvt) pathway; Spider biofilm induced	YGL180W	ATG1	serine/threonine protein kinase ATG1|APG1|CVT10|AUT3	Mitochondrial outer membrane protein required to initiate mitophagy; recruits the autophagy adaptor protein Atg11p and the ubiquitin-like protein Atg8p to the mitochondrial surface to initiate mitophagy, the selective vacuolar degradation of mitochondria in response to starvation; can promote pexophagy when placed ectopically in the peroxisomal membrane; regulates mitophagy and ethanol production…
	CAGL0M02915g	-2.08730492510971		Ortholog(s) have role in pexophagy and peroxisome localization				YJL185C	ATG36		Component of autophagosomes and Cvt vesicles; regulator of Atg1p, targets it to autophagosomes; binds the Atg1p-Atg13p complex, triggering its vacuolar degradation; unique ubiquitin-like protein whose conjugation target is lipid phosphatidylethanolamine (PE); Atg8p-PE is anchored to membranes, is involved in phagophore expansion, and may mediate membrane fusion during autophagosome formation; dec…
	CAGL0H06545g	-1.75274961200195		Ortholog(s) have role in mitophagy and integral component of mitochondrial outer membrane localization				YIL146C	ATG32	mitophagy protein ATG32|ECM37	Cyclin-like protein that interacts with Pho85p; has sequence similarity to G1 cyclins PCL1 and PCL2
	CAGL0A04675g	-1.7058517501251		Ortholog(s) have protein tag activity	C1_05700W	AUT7	Putative autophagosome protein; macrophage/pseudohyphal-repressed; alternatively spliced intron in 5' UTR; Spider biofilm induced	YBL078C	ATG8	ubiquitin-like protein ATG8|AUT7|CVT5|APG8	Protein of unknown function; may interact with ribosomes, based on co-purification experiments; YOR019W has a paralog, JIP4, that arose from the whole genome duplication
	CAGL0I07051g	-1.65967103051678		Ortholog(s) have cyclin-dependent protein serine/threonine kinase regulator activity, role in positive regulation of macroautophagy and cyclin-dependent protein kinase holoenzyme complex localization	CR_07240C	CLG1	Putative cyclin-like protein; transcription is regulated upon yeast-hyphal switch	YGL215W	CLG1		Mitochondrial mitophagy-specific protein; required primarily for mitophagy induced at post-log phase; not required for other types of selective autophagy or macroautophagy; conserved within fungi, but not in higher eukaryotes; ATG33 has a paralog, SCM4, that arose from the whole genome duplication
	CAGL0H08261g	-1.55910002630287		Ortholog(s) have role in mitophagy and ribosome localization				YOR019W	YOR019W		Phosphatidylinositol 3,5-bisphosphate-binding protein; plays a role in micronucleophagy; belongs to the PROPPIN family of proteins; predicted to fold as a seven-bladed beta-propeller; displays punctate cytoplasmic localization
	CAGL0B02860g	-1.48370232749049		Ortholog(s) have role in macroautophagy, mitophagy and mitochondrion localization				YLR356W	ATG33		Nuclear envelope protein; anchored to the nuclear inner membrane, that interacts with the vacuolar membrane protein Vac8p to promote formation of nucleus-vacuole junctions during piecemeal microautophagy of the nucleus (PMN)
	CAGL0B02101g	-1.3485938327135		Ortholog(s) have phosphatidylinositol-3,5-bisphosphate binding activity and role in macroautophagy, piecemeal microautophagy of nucleus	C4_05350W		Ortholog(s) have phosphatidylinositol-3,5-bisphosphate binding activity and role in macroautophagy, piecemeal microautophagy of nucleus	YGR223C	HSV2		Regulatory subunit of the vacuolar transporter chaperone (VTC) complex; involved in membrane trafficking, vacuolar polyphosphate accumulation, microautophagy and non-autophagic vacuolar fusion; VTC2 has a paralog, VTC3, that arose from the whole genome duplication
	CAGL0M07205g	-1.2934625051126		Ortholog(s) have role in cellular protein localization, piecemeal microautophagy of nucleus and nuclear envelope, nuclear periphery localization				YHR195W	NVJ1	VAB36	Autophagy-specific protein; required for recruiting other ATG proteins to the pre-autophagosomal structure (PAS); interacts with Atg17p and localizas to the PAS in a manner interdependent with Atg17p and Cis1p; not conserved; relocalizes from nucleus to cytoplasmic foci upon DNA replication stress
	CAGL0F02145g	-1.22115066469682	PHM1	Ortholog(s) have role in lysosomal microautophagy, polyphosphate metabolic process, protein localization, vacuolar transport, vacuole fusion, non-autophagic	CR_03610C	VTC3	Putative polyphosphate synthetase; downregulated in core caspofungin response; Hog1p-induced; transcription is opaque-specific; fungal-specific (no human or murine homolog)	YFL004W	VTC2	vacuolar transporter chaperone|PHM1	Subunit of a heterodimeric guanine nucleotide exchange factor (GEF); subunit of the Mon1-Ccz1 GEF complex which stimulates nucleotide exchange and activation of Ypt7p, a Rab family GTPase involved in membrane tethering and fusion events at the late endosome and vacuole; GEF activity is stimulated by membrane association and anionic phospholipids; role in localizing Ypt7p to the vacuolar membrane;…
	CAGL0M02013g	-1.18830395860594		Ortholog(s) have role in late nucleophagy, macroautophagy, mitophagy, piecemeal microautophagy of nucleus and cytosol, nucleus, pre-autophagosomal structure localization				YPL166W	ATG29		Autophagy-specific subunit of phosphatidylinositol 3-kinase complex I; Atg14p targets complex I to the phagophore assembly site (PAS); required for localizing additional ATG proteins to the PAS; required for overflow degradation of misfolded proteins when ERAD is saturated; homolog of human Barkor; other members are Vps34, Vps15, and Vps30p
	CAGL0F07051g	-1.15469040503278		Ortholog(s) have Rab guanyl-nucleotide exchange factor activity, phosphatidylinositol-3-phosphate binding, phosphatidylinositol-5-phosphate binding, phosphatidylserine binding activity	CR_03960C		Protein required for fusion of cvt-vesicles and autophagosomes with the vacuole; plays a role in autophagy, protein targeting to vacuole and vesicle docking; flow model biofilm induced	YGL124C	MON1	AUT12	Essential component of the conserved oligomeric Golgi complex; a cytosolic tethering complex that functions in protein trafficking to mediate fusion of transport vesicles to Golgi compartments; the components of the Golgi complex are Gog1p through Cog8p
	CAGL0C00627g	-1.03521525708833	ATG14	Ortholog(s) have role in CVT pathway, macroautophagy, pexophagy, piecemeal microautophagy of nucleus and fungal-type vacuole membrane, phosphatidylinositol 3-kinase complex, class III, type I, pre-autophagosomal structure localization				YBR128C	ATG14	APG14|CVT12	Component of transport protein particle (TRAPP) complex II; TRAPPII is a multimeric guanine nucleotide-exchange factor for the GTPase Ypt1p, regulating intra-Golgi and endosome-Golgi traffic
	CAGL0L04884g	1.28892786898178		Ortholog(s) have role in CVT pathway, ER to Golgi vesicle-mediated transport, macroautophagy, pexophagy, retrograde transport, vesicle recycling within Golgi	CR_02630C		Essential component of the conserved oligomeric Golgi complex; role in fusion of transport vesicles to Golgi compartments; rat catheter biofilm repressed	YGR120C	COG2	Golgi transport complex subunit COG2|SEC35
	CAGL0F03949g	2.86824008614072		Ortholog(s) have Rab guanyl-nucleotide exchange factor activity and role in CVT pathway, early endosome to Golgi transport, intra-Golgi vesicle-mediated transport, macroautophagy, regulation of GTPase activity	C4_05790W		Ortholog(s) have Rab guanyl-nucleotide exchange factor activity and role in CVT pathway, early endosome to Golgi transport, intra-Golgi vesicle-mediated transport, macroautophagy, regulation of GTPase activity	YMR218C	TRS130	transport protein particle complex II subunit TRS130	Clathrin-coated vesicle component, regulator of endocytosis; copurifies with the DSC ubiquitin ligase complex; UBX (ubiquitin regulatory X) domain-containing protein that interacts with Cdc48p; required for efficient clathrin-mediated endocytosis; ortholog of fission yeast Ucp10
Intracellular traficking	CAGL0L00737g	-1.99093052195261		Ortholog(s) have role in signal transduction and Golgi apparatus, endoplasmic reticulum, fungal-type vacuole membrane, mitochondrion, plasma membrane localization	C1_04760C	SYG1	Ortholog(s) have role in signal transduction and Golgi apparatus, endoplasmic reticulum, fungal-type vacuole membrane, mitochondrion, plasma membrane localization	YIL047C	SYG1		Putative protein of unknown function; proposed to be involved in responding to environmental stresses; the authentic, non-tagged protein is detected in highly purified mitochondria in high-throughput studies
	CAGL0L07128g	-1.58750509576655		Ortholog(s) have clathrin binding activity, role in clathrin-dependent endocytosis, histone H2B ubiquitination, protein processing and Dsc E3 ubiquitin ligase complex, clathrin-coated vesicle, endoplasmic reticulum localization	C4_03920W		Ortholog(s) have clathrin binding activity, role in clathrin-dependent endocytosis, histone H2B ubiquitination, protein processing and Dsc E3 ubiquitin ligase complex, clathrin-coated vesicle, endoplasmic reticulum localization	YDL091C	UBX3		Putative protein of unknown function; green fluorescent protein (GFP)-fusion protein localizes to the cytoplasm and colocalizes in a punctate pattern with the early golgi/COPI vesicles; YOL107W is not an essential protein
	CAGL0E02035g	-1.51813162927736		Ortholog(s) have cell periphery, fungal-type vacuole membrane localization	C1_06510C		Predicted MFS membrane transporter; member of the monocarboxylate porter (MCP) family; Spider biofilm induced	YOL119C	MCH4		Vacuolar protein; presumably functions within the endosomal-vacuolar trafficking pathway, affecting events that determine whether plasma membrane proteins are degraded or routed to the plasma membrane; RCR2 has a paralog, RCR1, that arose from the whole genome duplication
	CAGL0I07381g	-1.40522940970896		Ortholog(s) have COPI-coated vesicle, Golgi apparatus localization	C1_02410C		Ortholog(s) have COPI-coated vesicle, Golgi apparatus localization	YOL107W	YOL107W		Protein involved in SRP-independent targeting of substrates to the ER; component of an alternative ER targeting pathway that has partial functional redundancy with the GET pathway; preference for substrates with downstream transmembrane domains; interacts with Env10p/Snd2p and Pho88p/Snd3p; can compensate for loss of SRP; may interact with ribosomes, based on co-purification experiments; GFP-fusi…
	CAGL0M10417g	-1.34808912522794		Ortholog(s) have role in vesicle-mediated transport and fungal-type vacuole membrane, vesicle localization				YDR003W	RCR2	SSH5	FG-nucleoporin component of central core of the nuclear pore complex; also part of the nuclear pore complex (NPC) cytoplasmic filaments; contributes directly to nucleocytoplasmic transport and maintenance of the NPC permeability barrier and is involved in gene tethering at the nuclear periphery; interacts with Gle1p
	CAGL0F05687g	-1.25544147589987		Ortholog(s) have cytoplasm, ribosome localization				YDR186C	YDR186C		Protein of unknown function involved in vacuolar protein sorting; SWAT-GFP and mCherry fusion proteins localize to the endoplasmic reticulum
	CAGL0F05599g	-1.25146457063194		Ortholog(s) have nucleocytoplasmic transporter activity, structural constituent of nuclear pore activity	C3_04700W		Ortholog(s) have nucleocytoplasmic transporter activity, structural constituent of nuclear pore activity	YDR192C	NUP42	FG-nucleoporin NUP42|UIP1|RIP1	Lipid raft associated protein; overexpression restores Pma1p localization to lipid rafts which is required for targeting of Pma1p to the plasma membrane; sometimes classified in the medium-chain dehydrogenase/reductases (MDRs) superfamily; AST2 has a paralog, AST1, that arose from the whole genome duplication
	CAGL0M00616g	-1.10392331564446		Ortholog(s) have role in protein targeting to vacuole and endoplasmic reticulum localization	C7_00170W	VPS70	Ortholog(s) have role in protein targeting to vacuole and endoplasmic reticulum localization	YJR126C	VPS70	putative zinc metalloprotease	Membrane protein; has similarity to mammalian mannose-6-phosphate receptors; possibly functions as a sorting receptor in the delivery of vacuolar hydrolases; protein abundance increases in response to DNA replication stress
	CAGL0G03267g	-1.09395557853672		Ortholog(s) have role in protein targeting to membrane and cytoplasm localization	C2_05570C		Putative lipid raft associated protein; Spider biofilm induced	YER101C	AST2		v-SNARE protein involved in Golgi transport; homolog of the mammalian protein GOS-28/GS28
	CAGL0D01232g	-1.00682194169206		Ortholog(s) have signal sequence binding activity, role in vacuolar transport and Golgi apparatus, late endosome localization	C1_04840C		Ortholog(s) have signal sequence binding activity, role in vacuolar transport and late endosome localization	YPR079W	MRL1		Component of transport protein particle (TRAPP) complex II; TRAPPII is a multimeric guanine nucleotide-exchange factor for the GTPase Ypt1p, regulating intra-Golgi and endosome-Golgi traffic; role in cell wall beta-glucan biosynthesis and the stress response
	CAGL0E03872g	1.03371558970691		Ortholog(s) have SNAP receptor activity, role in Golgi vesicle transport, vesicle fusion and Golgi medial cisterna, SNARE complex localization	C7_01740C		Ortholog(s) have SNAP receptor activity, role in Golgi vesicle transport, vesicle fusion and Golgi medial cisterna, SNARE complex localization	YHL031C	GOS1		Delta adaptin-like subunit of the clathrin associated protein complex; functions in transport of alkaline phosphatase to the vacuole via the alternate pathway; suppressor of loss of casein kinase 1 function; the clathrin associated protein complex is also known as AP-3
	CAGL0I08855g	1.05688478927756		Ortholog(s) have Rab guanyl-nucleotide exchange factor activity, role in intra-Golgi vesicle-mediated transport, protein complex assembly and TRAPPII protein complex, trans-Golgi network localization	C1_05320C		Ortholog(s) have Rab guanyl-nucleotide exchange factor activity, role in intra-Golgi vesicle-mediated transport, protein complex assembly and TRAPPII protein complex, trans-Golgi network localization	YGR166W	TRS65	KRE11	GTPase inhibitor with similarity to F-box proteins; inhibits Ypt52p GTPase activity by preventing Ypt52p from binding GTP; involved in regulating intracellular trafficking; physically interacts with Skp1p
	CAGL0G09174g	1.10306827914686		Ortholog(s) have role in Golgi to vacuole transport, protein targeting to vacuole and AP-3 adaptor complex, nucleus localization	C3_02590W	APL5	Ortholog of S. cerevisiae and S. pombe Apl5; subunit of the AP-3 adaptor complex involved in Golgi-to-vacuole transport; phosphorylated protein; mutant is viable;	YPL195W	APL5	YKS4	Subunit of the BLOC-1 complex involved in endosomal maturation; interacts with Vps21p-GFP; has potential role in vacuolar function, as suggested by its ability to bind Vac8p; likely member of; Vab2p-GFP-fusion localizes to cytoplasm in punctate pattern
	CAGL0H02453g	1.1266323958034		Ortholog(s) have GTPase inhibitor activity, role in endocytosis, negative regulation of GTPase activity, protein targeting to vacuole and endoplasmic reticulum, nucleus localization	C7_04240C		Putative GTPase inhibitor; predicted role in endocytosis, protein targeting to vacuole; rat catheter biofilm repressed	YMR258C	ROY1		Protein that interacts with Rab GTPases; localized to late Golgi vesicles; computational analysis of large-scale protein-protein interaction data suggests a possible role in vesicle-mediated transport
	CAGL0L02409g	1.12992934461661		Ortholog(s) have role in endosome organization, regulation of protein localization and BLOC-1 complex localization				YEL005C	VAB2	VAB31	Peripheral membrane protein needed for Golgi-to-ER retrograde traffic; mediates Sey1p-independent homotypic ER fusion; forms Dsl1 tethering complex with Sec39p and Tip20p that forms a stable complex with ER SNAREs Sec20p, Ufe1p and Use1p and is functionally conserved from yeast to mammalian cells; component of the ER target site that interacts with coatomer; interacts with different subunits of C…
	CAGL0I04268g	1.14586262084616		Ortholog(s) have Rab GTPase binding activity and Golgi apparatus localization	C1_12920C		Ortholog(s) have Rab GTPase binding activity and Golgi apparatus, endoplasmic reticulum localization	YGL161C	YIP5		F-box protein involved in recycling endocytosed proteins; involved in recycling plasma membrane proteins internalized by endocytosis; localized to sites of polarized growth; direct interaction with C-terminal cytoplasmic region of Drs2p plays an important role for Drs2p function in endocytic recycling pathway
	CAGL0J07964g	1.15877961743317		Ortholog(s) have role in ER-dependent peroxisome organization, retrograde vesicle-mediated transport, Golgi to ER and Dsl1/NZR complex, cytosol, nucleus, peroxisome localization	CR_06940W	DSL1	Protein similar to S. cerevisiae Dsl1p, which is a member of the t-SNARE complex of the endoplasmic reticulum	YNL258C	DSL1	RNS1	Protein of the Sec1p/Munc-18 family; essential for vacuolar protein sorting; required for the function of Pep12p and the early endosome/late Golgi SNARE Tlg2p; essential for fusion of Golgi-derived vesicles with the prevacuolar compartment
	CAGL0F02497g	1.18114786277022		Ortholog(s) have SNARE binding activity, role in early endosome to Golgi transport, endocytic recycling, endocytosis and Golgi apparatus, cellular bud, endosome, site of polarized growth localization	C5_01720C	RCY1	Putative F-box protein involved in endocytic membrane traffic and/or recycling; fungal-specific (no human or murine homolog)	YJL204C	RCY1		Mitochondrial intermembrane space protein; forms a complex with Tim13p that delivers a subset of hydrophobic proteins to the TIM22 complex for inner membrane insertion; homolog of human TIMM8A, implicated in Mohr-Tranebjaerg syndrome, also known as deafness-dystonia-optic neuronopathy (DDON) syndrome; human TIMM8A can complement yeast null mutant
	CAGL0H03003g	1.21335781863305		Ortholog(s) have SNARE binding, unfolded protein binding activity	C6_03300C		Ortholog(s) have SNARE binding, unfolded protein binding activity	YGL095C	VPS45	VPL28|STT10	Member of the p24 family involved in ER to Golgi transport; similar to Emp24p and Erv25p; the authentic, non-tagged protein is detected in highly purified mitochondria in high-throughput studies; ERP6 has a paralog, ERP1, that arose from the whole genome duplication
	CAGL0M00418g	1.25025504128187		Ortholog(s) have protein transporter activity, role in protein import into mitochondrial inner membrane and cytosol, mitochondrial intermembrane space protein transporter complex localization	C3_07890W	TIM8	Predicted mitochondrial intermembrane space protein with role in protein import into mitochondrial inner membrane and cytosol	YJR135W-A	TIM8	protein transporter TIM8	Component of CORVET membrane tethering complex; cytoplasmic protein required for the sorting and processing of soluble vacuolar proteins, acidification of the vacuolar lumen, and assembly of the vacuolar H+-ATPase
	CAGL0A00627g	1.30596354940548		Ortholog(s) have role in ER to Golgi vesicle-mediated transport and endoplasmic reticulum, mitochondrion localization				YGL002W	ERP6		Membrane protein of unknown function; overexpression suppresses NaCl sensitivity of sro7 mutant cells by restoring sodium pump (Ena1p) localization to the plasma membrane
	CAGL0G04697g	1.32623613277285		Ortholog(s) have role in protein targeting to vacuole, vacuolar acidification, vacuole inheritance and CORVET complex localization	CR_10590W		Ortholog of S. cerevisiae Vps3; CORVET tethering complex component involved in vacuolar protein sorting; Hap43-repressed gene	YDR495C	VPS3	CORVET complex subunit VPS3|VPT17|VPL3|PEP6	WD40 repeat-containing protein associated with the CCR4-NOT complex; interacts in a Ccr4p-dependent manner with Ssn2p; also interacts with Fis1p, Mdv1p and Dnm1p and plays a role in mitochondrial fission; CAF4 has a paralog, MDV1, that arose from the whole genome duplication
	CAGL0H02255g	1.36006956494831		Ortholog(s) have role in Golgi to plasma membrane transport and cell periphery, endoplasmic reticulum, fungal-type vacuole membrane localization	C1_09430W		Putative membrane protein; induced by alpha pheromone in SpiderM medium; Hap4-induced gene; Spider biofilm induced	YMR266W	RSN1		Integral membrane component of ER-derived COPII-coated vesicles; functions in ER to Golgi transport; EMP46 has a paralog, EMP47, that arose from the whole genome duplication
	CAGL0L03201g	1.36194549407932		Ortholog(s) have role in mitochondrial fission, peroxisome fission, regulation of transcription from RNA polymerase II promoter and CCR4-NOT complex, mitochondrion localization				YKR036C	CAF4		Protein with similarity to Emp24p and Erv25p; member of the p24 family involved in ER to Golgi transport
	CAGL0L13244g	1.38569711273197		Ortholog(s) have glycoprotein binding activity, role in ER to Golgi vesicle-mediated transport and ER to Golgi transport vesicle, Golgi membrane, endoplasmic reticulum localization	CR_07180W	EMP46	Protein similar to S. cerevisiae Emp46, an integral membrane component of ER-derived COPII-coated vesicles; functions in ER to Golgi transport; induced by alpha pheromone in SpiderM medium	YLR080W	EMP46		Possible rhomboid protease; has similarity to eukaryotic rhomboid proteases including Pcp1p
	CAGL0I01232g	1.3857068873676		Ortholog(s) have endoplasmic reticulum localization	C1_10940C	ERP5	Protein involved in ER to Golgi transport; rat catheter and Spider biofilm repressed	YHR110W	ERP5		Protein localized to COPII vesicles; proposed to be involved in ER to Golgi transport; interacts with members of the Rab GTPase family and Yip1p; also interacts with Rtn1p
	CAGL0H00803g	1.42505007570912		Ortholog(s) have COPI-coated vesicle, Golgi apparatus, nuclear periphery localization	C7_01950W		Ortholog(s) have COPI-coated vesicle, Golgi apparatus, nuclear periphery localization	YPL246C	RBD2	putative rhomboid protease RBD2
	CAGL0G01452g	1.45510363141807		Ortholog(s) have role in ER to Golgi vesicle-mediated transport and ER to Golgi transport vesicle, Golgi apparatus, endoplasmic reticulum localization	C1_06480C		Ortholog(s) have role in ER to Golgi vesicle-mediated transport and ER to Golgi transport vesicle, Golgi apparatus, endoplasmic reticulum localization	YNL044W	YIP3		Subunit of the TIM23 translocase complex; acts to couple Tim21p with the core Tim23 translocase; provides quality control for insertion of membrane proteins by regulating their release into the inner membrane by the TIM23 complex; absolutely required for mitochondrial import of presequence-containing proteins at elevated temperature; required for viability of cells lacking the mitochondrial genom…
	CAGL0J10428g	1.46079599545118		Has domain(s) with predicted GTPase activator activity, role in regulation of GTPase activity, regulation of small GTPase mediated signal transduction and intracellular localization							Clathrin light chain; subunit of the major coat protein involved in intracellular protein transport and endocytosis; regulates endocytic progression; thought to regulate clathrin function; the clathrin triskelion is a trimeric molecule composed of three heavy chains that radiate from a vertex and three light chains which bind noncovalently near the vertex of the triskelion
	CAGL0H05797g	1.46524127266424		Ortholog(s) have role in protein import into mitochondrial inner membrane, protein import into mitochondrial matrix and mitochondrial inner membrane presequence translocase complex, plasma membrane localization	C1_00460W		Putative TIM23 translocase complex subunit; membrane-localized; Hap43-repressed	YPL098C	MGR2		Epsilon-COP subunit of the coatomer; regulates retrograde Golgi-to-ER protein traffic; stabilizes Cop1p, the alpha-COP and the coatomer complex; non-essential for cell growth; protein abundance increases in response to DNA replication stress
	CAGL0I08833g	1.59103971366064		Ortholog(s) have role in clathrin-dependent endocytosis, exocytosis, positive regulation of endocytosis, protein trimerization and endosome, trans-Golgi network localization	C4_01980C	CLC1	Clathrin light chain; subunit of the major coat protein involved in intracellular protein transport and endocytosis; rat cathetr and Spider biofilm repressed	YGR167W	CLC1	SCD4	Cis-golgi localized protein involved in ER to Golgi transport; forms a complex with the mammalian GRASP65 homolog, Grh1p; mutants are compromised for the fusion of ER-derived vesicles with Golgi membranes
	CAGL0M12903g	1.6677554289244	SEC28	Putative epsilon-COP coatomer subunit	C5_00080C		Epsilon-COP subunit of the coatomer; regulates retrograde Golgi-to-ER protein traffic; Spider biofilm repressed	YIL076W	SEC28	coatomer subunit epsilon|ANU2
	CAGL0L07282g	1.72619154027981		Ortholog(s) have role in ER to Golgi vesicle-mediated transport, protein secretion and cis-Golgi network, cytoplasm localization	C2_02260W		Putative cis-golgi localized protein involved in ER to Golgi transport; Spider biofilm repressed	YDL099W	BUG1		Essential protein involved in vesicle-mediated ER to Golgi transport; binds membranes and functions during vesicle docking to the Golgi; required for assembly of the ER-to-Golgi SNARE complex
	CAGL0F00209g	2.08165056788612		Has domain(s) with predicted role in transmembrane transport and integral component of membrane localization
	CAGL0D00924g	2.51200315701571		Ortholog(s) have role in ER to Golgi vesicle-mediated transport, Golgi vesicle docking, SNARE complex assembly and ER to Golgi transport vesicle membrane, Golgi membrane localization	C4_05280W	USO1	Ortholog(s) have role in ER to Golgi vesicle-mediated transport, Golgi vesicle docking, SNARE complex assembly and ER to Golgi transport vesicle membrane, Golgi membrane localization	YDL058W	USO1	INT1
Protein metabolism	CAGL0D00264g	-3.75110900037218	NUD1	Putative nuclear phosphatase regulatory subunit; gene is downregulated in azole-resistant strain							Acetyl-coA synthetase isoform; along with Acs2p, acetyl-coA synthetase isoform is the nuclear source of acetyl-coA for histone acetylation; expressed during growth on nonfermentable carbon sources and under aerobic conditions
	CAGL0E01727g	-3.38714866974393	YPS3	Putative aspartic protease; predicted GPI-anchor; member of a YPS gene cluster that is required for virulence in mice
	CAGL0G02563g	-2.31867284275537		Has domain(s) with predicted thiol-dependent ubiquitinyl hydrolase activity and role in protein deubiquitination, ubiquitin-dependent protein catabolic process							Serine/threonine protein kinase; inhibits pheromone induced signalling downstream of MAPK, possibly at the level of the Ste12p transcription factor; mutant has increased aneuploidy tolerance; PRR2 has a paralog, NPR1, that arose from the whole genome duplication
	CAGL0C00275g	-2.29379742450778	HSP31	Putative cysteine protease; protein differentially expressed in azole resistant strain; gene is upregulated in azole-resistant strain							Predicted protein kinase; overexpression causes sensitivity to staurosporine, which is a potent inhibitor of protein kinase C
	CAGL0G05720g	-2.06962798462975		Ortholog(s) have protein kinase activity				YDL214C	PRR2	serine/threonine protein kinase PRR2	Haploid specific endoprotease of a-factor mating pheromone; performs one of two N-terminal cleavages during maturation of a-factor mating pheromone; required for axial budding pattern of haploid cells
	CAGL0G01716g	-2.06475101248841		Has domain(s) with predicted ATP binding, protein kinase activity, protein tyrosine kinase activity and role in protein phosphorylation				YPR106W	ISR1	putative protein kinase ISR1
	CAGL0D04686g	-1.95719812368807		Ortholog(s) have metalloendopeptidase activity, role in axial cellular bud site selection, cytogamy, peptide mating pheromone maturation involved in conjugation with cellular fusion and cellular bud neck, mating projection tip localization	CR_09470W	AXL1	Putative endoprotease; induced by alpha factor; transcript is upregulated in an RHE model of oral candidiasis and in clinical isolates from HIV+ patients with oral candidiasis	YPR122W	AXL1	STE22|FUS5
	CAGL0E01793g	-1.84722372615828	YPS6	Putative aspartic protease; predicted GPI-anchor; member of a YPS gene cluster that is required for virulence in mice; expression induced at high temperature							Protein kinase similar to S/T protein kinase Ypk1p; functionally redundant with YPK1 at the genetic level; participates in a signaling pathway required for optimal cell wall integrity; involved in the TORC-dependent phosphorylation of ribosomal proteins Rps6a/b (S6); human homolog SGK2 can complement a ypk1 ypk2 double mutant
	CAGL0B03014g	-1.81606249242548		Has domain(s) with predicted transferase activity, transferring glycosyl groups activity and role in protein glycosylation							Proteasome activator; binds the core proteasome (CP) and stimulates proteasome-mediated protein degradation by inducing gate opening; required for sequestering CP into proteasome storage granule (PSG) during quiescent phase and for nuclear import of CP in proliferating cells; required for resistance to bleomycin, may be involved in protecting against oxidative damage; similar to mammalian PA200
	CAGL0K03399g	-1.76647061822253	YPK2	Ortholog(s) have protein serine/threonine kinase activity, protein serine/threonine kinase inhibitor activity				YMR104C	YPK2	putative protein kinase YPK2|YKR2	Biotin:apoprotein ligase; covalently modifies proteins with the addition of biotin, required for acetyl-CoA carboxylase (Acc1p) holoenzyme formation; comparative analysis suggests that a mitochondrially targeted form may result from translation starting at a non-canonical codon upstream of the annotated start codon; human homolog HLCS can complement yeast BPL1 mutant
	CAGL0F02101g	-1.72977142509821		Ortholog(s) have peptidase activator activity, proteasome binding activity	C2_08010W	BLM3	Putative proteasome activator; binds core proteasome and stimulates proteasome-mediated protein degradation by inducing gate opening; ortholog of S. cerevisiae Blm10; transcript regulated by Nrg1 and Mig1	YFL007W	BLM10	YFL006W	Protein kinase involved in negative regulation of PolIII transcription; effector kinase of the TOR signaling pathway and phosphorylates Rpc53p to regulate ribosome and tRNA biosynthesis; member of the LAMMER family of protein kinases, which are serine/threonine kinases also capable of phosphorylating tyrosine residues; capable of autophosphorylation
	CAGL0I03806g	-1.68419372942035		Ortholog(s) have biotin-[acetyl-CoA-carboxylase] ligase activity, biotin-[pyruvate-carboxylase] ligase activity, role in protein biotinylation and cytoplasm, nucleus localization	CR_10620C		Biotin protein ligase; catalyzes covalent attachment of biotin to biotin-dependent enzymes including acetyl CoA carboxylase and pyruvate carboxylase	YDL141W	BPL1	biotin--[acetyl-CoA-carboxylase] ligase BPL1|ACC2	Inhibitor of carboxypeptidase Y (Prc1p), and Ras GAP (Ira2p); phosphatidylethanolamine-binding protein (PEBP) family member and ortholog of hPEBP1/RKIP, a natural metastasis suppressor; targets to vacuolar membranes during stationary phase; acetylated by NatB N-terminal acetyltransferase; protein abundance increases in response to DNA replication stress
	CAGL0D06600g	-1.66584275372205		Ortholog(s) have protein serine/threonine kinase activity, protein tyrosine kinase activity and role in negative regulation of transcription from RNA polymerase III promoter, peptidyl-serine phosphorylation, protein autophosphorylation	C1_13470W	KNS1	Protein kinase involved in negative regulation of PolIII transcription; effector kinase of the TOR signaling pathway, phosphorylates Rpc53p to regulate ribosome and tRNA biosynthesis; Spider and flow model biofilm induced	YLL019C	KNS1	serine/threonine protein kinase KNS1|L124	Phosphopantetheine:protein transferase (PPTase); activates mitochondrial acyl carrier protein (Acp1p) by phosphopantetheinylation
	CAGL0B01100g	-1.65931875030746		Phosphatidylethanolamine-binding protein	C5_00930C	TFS1	Putative carboxypeptidase y inhibitor; transcript regulated upon yeast-hypha switch; colony morphology-related gene regulation by Ssn6	YLR178C	TFS1	DKA1	UBX (ubiquitin regulatory X) domain-containing protein; interacts with Cdc48p, transcription is repressed when cells are grown in media containing inositol and choline; UBX6 has a paralog, UBX7, that arose from the whole genome duplication
	CAGL0M02365g	-1.64812923694213		Ortholog(s) have holo-[acyl-carrier-protein] synthase activity, role in protein-cofactor linkage and mitochondrion localization	C1_09480W	PPT2	Phosphopantetheinyl transferase (PPTase); Spider biofilm induced	YPL148C	PPT2	holo-[acyl-carrier-protein] synthase	Integral membrane peptide transporter; mediates transport of di- and tri-peptides; conserved protein that contains 12 transmembrane domains; PTR2 expression is regulated by the N-end rule pathway via repression by Cup9p
	CAGL0J04884g	-1.63692714848584		Ortholog(s) have role in sporulation resulting in formation of a cellular spore, ubiquitin-dependent protein catabolic process and nucleus localization				YJL048C	UBX6	CUI2	Palmitoyl transferase involved in protein palmitoylation; acts as a negative regulator of pheromone response pathway; required for endocytosis of pheromone receptors; involved in cell shape control; contains ankyrin repeats; AKR1 has a paralog, AKR2, that arose from the whole genome duplication; any of several human homologs encoding DHHC-type zinc fingers (ZDHHC) can complement temperature sensi…
	CAGL0G02453g	-1.6316418414904		Ortholog(s) have dipeptide transmembrane transporter activity, tripeptide transporter activity and role in dipeptide transmembrane transport, tripeptide transport	C3_03800W	PTR22	Oligopeptide transporter involved in uptake of di-/tripeptides; regulated by Stp2 and Stp3; transcript induced upon phagocytosis by macrophage; repressed by Rim101 at pH 8; flow model biofilm induced	YKR093W	PTR2		Mitochondrial protein kinase; negatively regulates activity of the pyruvate dehydrogenase complex by phosphorylating the ser-133 residue of the Pda1p subunit; acts in concert with kinase Pkp1p and phosphatases Ptc5p and Ptc6p; relocalizes from mitochondrion to cytoplasm upon DNA replication stress
	CAGL0M08712g	-1.62217628274859		Ortholog(s) have palmitoyltransferase activity and role in protein palmitoylation, protein targeting to membrane, regulation of endocytosis, regulation of pheromone-dependent signal transduction involved in conjugation with cellular fusion	C1_13220C	AKR1	Ankyrin-repeat protein; induced by fluphenazine	YDR264C	AKR1	palmitoyltransferase AKR1	Vacuolar carboxypeptidase S; expression is induced under low-nitrogen conditions
	CAGL0F07007g	-1.55706434418234		Ortholog(s) have pyruvate dehydrogenase (acetyl-transferring) kinase activity, role in carbon utilization, negative regulation of catalytic activity, peptidyl-serine phosphorylation and mitochondrion localization				YGL059W	PKP2	protein kinase PKP2	Vacuolar carboxypeptidase Y (proteinase C, CPY); broad-specificity C-terminal exopeptidase involved in non-specific protein degradation in the vacuole; member of the serine carboxypeptidase family
	CAGL0C00319g	-1.54046657313325		Ortholog(s) have carboxypeptidase activity, role in nitrogen compound metabolic process, proteolysis involved in cellular protein catabolic process and fungal-type vacuole lumen localization	C4_03050C		Ortholog(s) have carboxypeptidase activity, role in nitrogen compound metabolic process, proteolysis involved in cellular protein catabolic process and fungal-type vacuole lumen localization	YJL172W	CPS1	Gly-Xaa carboxypeptidase	Multi-spanning vacuolar membrane protease; glycosylated transmembrane protein bearing homology to the M28 family of metalloproteases; has a lumenal-facing protease domain; proposed role in vacuole physiology
	CAGL0M13651g	-1.46901771381805		Ortholog(s) have serine-type carboxypeptidase activity, role in phytochelatin biosynthetic process and endoplasmic reticulum, extracellular region, fungal-type vacuole localization	C7_03360W	CPY1	Carboxypeptidase Y; transcript regulated at yeast-hypha transition or macrophage response; induced human neutrophils; regulated by Gcn2 and Gcn4; putative N-glycosylation	YMR297W	PRC1	CPY1|carboxypeptidase C PRC1|CPY|LBC1	Catalytic subunit of the COP9 signalosome (CSN) complex; acts as an isopeptidase in cleaving the ubiquitin-like protein Nedd8 from SCF ubiquitin ligases; metalloendopeptidase involved in the adaptation to pheromone signaling; involved in modulation of genes controlling amino acid and lipid metabolism, and ergosterol biosynthesis
	CAGL0M01936g	-1.46329538762505		Ortholog(s) have cytosol, fungal-type vacuole membrane localization	C2_10870W		Ortholog(s) have fungal-type vacuole membrane localization	YBR074W	PFF1	YBR075W	Repressible vacuolar alkaline phosphatase; regulated by levels of Pi and by Pho4p, Pho9p, Pho80p, Pho81p and Pho85p; dephosphorylates phosphotyrosyl peptides; contributes to NAD+ metabolism by producing nicotinamide riboside from NMN
	CAGL0G05676g	-1.45624537591349		Ortholog(s) have metalloendopeptidase activity and role in adaptation of signaling pathway by response to pheromone involved in conjugation with cellular fusion, positive regulation of ergosterol biosynthetic process, protein deneddylation	C4_03450C	JAB1	Component of the COP9 signalosome (CSN) complex, provides catalytic activity for deneddylation that cleaves the ubiquitin-like protein tag Rub1p off the cullin (Cdc53p) molecule	YDL216C	RRI1	COP9 signalosome catalytic subunit RRI1|JAB1|CSN5	GID Complex regulatory subunit; binds GID Complex in response to glucose through interactions with complex member Vid28p; regulates fructose-1,6-bisphosphatase (FBPase) targeting to the vacuole; promotes proteasome-dependent catabolite degradation of FBPase; peripheral membrane protein located at Vid (vacuole import and degradation) vesicles
	CAGL0H07359g	-1.4528124541396	PHO8	Ortholog(s) have alkaline phosphatase activity, role in nicotinamide nucleotide metabolic process, protein dephosphorylation and extracellular region, fungal-type vacuole membrane localization	C1_08780W		Ortholog(s) have alkaline phosphatase activity, role in nicotinamide nucleotide metabolic process, protein dephosphorylation and extracellular region, fungal-type vacuole membrane localization	YDR481C	PHO8	alkaline phosphatase PHO8|phoH	Regulator of ornithine decarboxylase Spe1p; antizyme that binds to Spe1p to stimulate ubiquitin-independent degradation by the proteasome; binding of polyamines to nascent Oaz1p during translation stimulates +1 ribosomal frameshifting, allowing translation of full-length Oaz1p
	CAGL0K12254g	-1.43537682938523		Ortholog(s) have role in negative regulation of gluconeogenesis, proteasome-mediated ubiquitin-dependent protein catabolic process, protein catabolic process in the vacuole, protein targeting to vacuole	C3_06560W		Ortholog of S.c. Vid24; a peripheral membrane protein located at Vid (vacuole import and degradation) vesicles; regulated by Sef1, Sfu1, and Hap43; Spider biofilm induced	YBR105C	VID24	glucose-induced degradation complex subunit VID24|GID4	Putative metalloprotease with similarity to zinc carboxypeptidases; required for normal cell wall assembly
	CAGL0M07403g	-1.43165352985812	OAZ1	Ortholog(s) have ornithine decarboxylase inhibitor activity and role in negative regulation of translational frameshifting, regulation of proteasomal protein catabolic process				YPL052W	OAZ1	YPL052W-A	Homeodomain-containing transcriptional repressor; regulates expression of PTR2, which encodes a major peptide transporter; imported peptides activate ubiquitin-dependent proteolysis, resulting in degradation of Cup9p and de-repression of PTR2 transcription; CUP9 has a paralog, TOS8, that arose from the whole genome duplication; protein abundance increases in response to DNA replication stress
	CAGL0G06072g	-1.40877362923634		Ortholog(s) have endoplasmic reticulum, fungal-type vacuole localization	C3_03030C	ECM14	Ortholog(s) have endoplasmic reticulum, fungal-type vacuole localization	YHR132C	ECM14	putative metallocarboxypeptidase	F-Box protein involved in proteasome-dependent degradation of Aah1p; involved in proteasome-dependent degradation of Aah1p during entry of cells into quiescence; interacts with Skp1
	CAGL0C01551g	-1.40795173549911		Ortholog(s) have RNA polymerase II core promoter proximal region sequence-specific DNA binding, RNA polymerase II repressing transcription factor binding activity				YPL177C	CUP9		Protein required for degradation of unstable forms of cytochrome c; located in the mitochondria
	CAGL0B03311g	-1.38586542434928		Ortholog(s) have ubiquitin-protein transferase activity, role in SCF-dependent proteasomal ubiquitin-dependent protein catabolic process and SCF ubiquitin ligase complex localization	C6_03780C		Ortholog(s) have ubiquitin-protein transferase activity, role in SCF-dependent proteasomal ubiquitin-dependent protein catabolic process and SCF ubiquitin ligase complex localization	YBR280C	SAF1	SCF ubiquitin ligase complex subunit SAF1	Alpha arrestin; controls nutrient-mediated intracellular sorting of permease Gap1p; interacts with AP-1 subunit Apl4p; phosphorylated by Npr1p and also by cyclin-CDK complex Pcl7p-Pho85p; promotes endocytosis of plasma membrane proteins; ALY2 has a paralog, ALY1, that arose from the whole genome duplication
	CAGL0L08426g	-1.34297833111756	SUE1	Ortholog(s) have role in protein catabolic process and mitochondrial envelope localization				YPR151C	SUE1		ER membrane glycoprotein subunit of the GPI transamidase complex; adds glycosylphosphatidylinositol (GPI) anchors to newly synthesized proteins; human PIG-K protein is a functional homolog
	CAGL0M03135g	-1.31863203213798		Ortholog(s) have protein binding, bridging, ubiquitin protein ligase binding activity and role in positive regulation of ubiquitin-dependent endocytosis, regulation of intracellular transport	C6_03180C		Ortholog(s) have protein binding, bridging, ubiquitin protein ligase binding activity and role in positive regulation of ubiquitin-dependent endocytosis, regulation of intracellular transport	YJL084C	ALY2	ART3	C3HC4-type RING-finger peroxin and E3 ubiquitin ligase; required for peroxisome biogenesis and peroxisomal matrix protein import; forms translocation subcomplex with Pex2p and Pex10p; mutations in human homolog cause peroxisomal disorder
	CAGL0M01298g	-1.22799168362987		Ortholog(s) have GPI-anchor transamidase activity, role in attachment of GPI anchor to protein and GPI-anchor transamidase complex localization	C1_07460C	GPI8	Protein similar to S. cerevisiae Gpi8p, which is a subunit of the GPI transamidase complex that adds GPI anchors to proteins; likely to be essential for growth, based on an insertional mutagenesis strategy	YDR331W	GPI8	GPI-anchor transamidase	Vacuolar aminopeptidase Y; processed to mature form by Prb1p
	CAGL0M07469g	-1.21456620675447	PEX12	Ortholog(s) have ubiquitin-protein transferase activity, role in protein import into peroxisome matrix, protein monoubiquitination and integral component of peroxisomal membrane, peroxisomal importomer complex localization	C2_01150W	PEX12	Ortholog(s) have ubiquitin-protein transferase activity, role in protein import into peroxisome matrix, protein monoubiquitination and integral component of peroxisomal membrane, peroxisomal importomer complex localization	YMR026C	PEX12	ubiquitin-protein ligase peroxin 12|PAS11	Subunit of chromatin modifying histone acetyltransferase complexes; member of the ADA complex, the SAGA complex, and the SLIK complex; transcriptional regulator involved in glucose repression of Gal4p-regulated genes
	CAGL0G07623g	-1.19466572576698		Ortholog(s) have aminopeptidase activity, role in protein catabolic process in the vacuole and extracellular region, fungal-type vacuole localization	C2_08800C	APE3	Putative vacuolar aminopeptidase Y,; regulated by Gcn2 and Gcn4; rat catheter and Spider biofilm repressed	YBR286W	APE3	APY1	Endoplasmic reticulum (ER) resident protein; required for ER exit of the high-affinity phosphate transporter Pho84p, specifically required for packaging of Pho84p into COPII vesicles; protein abundance increases in response to DNA replication stress
	CAGL0E00693g	-1.19436183561321		Ortholog(s) have histone acetyltransferase activity, role in histone acetylation and Ada2/Gcn5/Ada3 transcription activator complex, SAGA complex, SLIK (SAGA-like) complex localization	C1_03290W	NGG1	Ortholog(s) have histone acetyltransferase activity and role in histone acetylation, regulation of transcription from RNA polymerase II promoter	YDR176W	NGG1	histone acetyltransferase NGG1|SWI7|ADA3	Putative serine/threonine protein kinase; regulates spermine uptake; involved in polyamine transport; possible mitochondrial protein; PTK1 has a paralog, PTK2, that arose from the whole genome duplication
	CAGL0L05456g	-1.19367554605205	PHO86	Ortholog(s) have unfolded protein binding activity, role in ER to Golgi vesicle-mediated transport, protein folding, regulation of phosphate transport and endoplasmic reticulum localization	C2_07820C	PHO86	Putative endoplasmic reticulum protein; possibly adherence-induced	YJL117W	PHO86		Mitochondrial type 2C protein phosphatase (PP2C); has similarity to mammalian PP1Ks; involved in mitophagy; null mutant is sensitive to rapamycin and has decreased phosphorylation of the Pda1 subunit of pyruvate dehydrogenase
	CAGL0H09152g	-1.17916765517645		Ortholog(s) have role in polyamine transport				YKL198C	PTK1	putative serine/threonine protein kinase PTK1|POT1|YKT9|YKL199C|STK1|KKT8	F-box protein and component of SCF ubiquitin ligase complexes; involved in ubiquitin-dependent protein catabolism; readily monoubiquitinated in vitro by SCF-Ubc4 complexes; SCF-Ucc1 regulates level of Cit2 citrate synthase protein to maintain citrate homeostasis, acts as metabolic switch for glyoxylate cycle; UCC1 transcription is downregulated in cells grown on C2-compounds
	CAGL0E00649g	-1.1784007662122		Ortholog(s) have magnesium-dependent protein serine/threonine phosphatase activity	CR_07770C	PTC6	Mitochondrial protein phosphatase of the Type 2C-related family (serine/threonine-specific), functional homolog of S. cerevisiae Ptc6p; mutant shows virulence defect	YCR079W	PTC6	type 2C protein phosphatase PTC6|PPP2|AUP1
	CAGL0C01155g	-1.16902010001944		Ortholog(s) have role in SCF-dependent proteasomal ubiquitin-dependent protein catabolic process, cellular response to methylmercury and SCF ubiquitin ligase complex localization	C6_03050C		Protein of unknown function; transcript is upregulated in clinical isolates from HIV+ patients with oral candidiasis	YLR224W	YLR224W		Peroxisomal membrane E3 ubiquitin ligase; required for for Ubc4p-dependent Pex5p ubiquitination and peroxisomal matrix protein import; contains zinc-binding RING domain; mutations in human homolog cause various peroxisomal disorders
	CAGL0E01859g	-1.16601430960386	YPS10	Putative aspartic protease; predicted GPI-anchor; member of a YPS gene cluster that is required for virulence in mice; induced in response to low pH and high temperature							Calmodulin-dependent protein kinase; may play a role in stress response, many Ca++/calmodulin dependent phosphorylation substrates demonstrated in vitro, amino acid sequence similar to mammalian Cam Kinase II; CMK1 has a paralog, CMK2, that arose from the whole genome duplication
	CAGL0M08690g	-1.16589804044448	PEX10	Ortholog(s) have ubiquitin-protein transferase activity, role in protein import into peroxisome matrix, protein polyubiquitination and peroxisomal importomer complex, peroxisomal membrane localization	C4_00320C		Ortholog(s) have ubiquitin-protein transferase activity, role in protein import into peroxisome matrix, protein polyubiquitination and endoplasmic reticulum, peroxisomal importomer complex, peroxisomal membrane localization	YDR265W	PEX10	ubiquitin-protein ligase peroxin 10|PAS4	Protein that regulates ubiquitination of Rsp5p; has a WW domain consensus motif of PPPSY (residues 131-135) that mediates binding of Rsp5p to Ubp2p; contains an UBA domain; relative distribution to the nucleus increases upon DNA replication stress
	CAGL0K10604g	-1.16124797236437		Ortholog(s) have calmodulin-dependent protein kinase activity, role in protein phosphorylation, signal transduction and cytoplasm localization				YFR014C	CMK1	calmodulin-dependent protein kinase CMK1	Alpha-1,2-mannosyltransferase; responsible for addition of the second alpha-1,2-linked mannose of the branches on the mannan backbone of oligosaccharides, localizes to an early Golgi compartment
	CAGL0I07205g	-1.14267094784749		Ortholog(s) have role in positive regulation of protein autoubiquitination, protein deubiquitination and cytoplasm, nucleus localization	C1_01540W		Ortholog(s) have role in positive regulation of protein autoubiquitination, protein deubiquitination and cytoplasm, nucleus localization	YOR138C	RUP1		Component of the ESCRT-I complex; complex is involved in ubiquitin-dependent sorting of proteins into the endosome; conserved C-terminal domain interacts with ESCRT-III subunit Vps20p; other members include Stp22p, Srn2p, Vps28p, and Mvb12p
	CAGL0M02871g	-1.12350835919102		Ortholog(s) have alpha-1,2-mannosyltransferase activity, role in protein glycosylation and Golgi apparatus localization				YJL186W	MNN5	alpha-1,2-mannosyltransferase MNN5
	CAGL0H05181g	-1.11122365888302		Putative component of ESCRT-I complex involved in protein trafficking; gene is upregulated in azole-resistant strain	C2_08940C	VPS28	ESCRT I protein sorting complex subunit; involved in Rim8 processing and proteolytic activation of Rim101, which regulates pH response; role in echinocandin, azole sensitivity	YPL065W	VPS28	ESCRT-I subunit protein VPS28|VPL13|VPT28	Protein proposed to regulate endocytosis of plasma membrane proteins; regulates by recruiting the ubiquitin ligase Rsp5p to its target in the plasma membrane; SWAT-GFP and mCherry fusion proteins localize to the cytosol
	CAGL0C04048g	-1.10872068753574		Has domain(s) with predicted transferase activity, transferring glycosyl groups activity and role in protein glycosylation							Protein that negatively regulates the SCF E3-ubiquitin ligase; regulates by interacting with and preventing neddyation of the cullin subunit, Cdc53p; longevity determinant that is preferentially expressed in young cells; similar to mammalian Cand1
	CAGL0K04653g	-1.08459049817862		Ortholog(s) have ubiquitin protein ligase binding activity and cytosol localization	C1_03400W		Ortholog(s) have ubiquitin protein ligase binding activity and cytosol localization	YGR068C	ART5		ATPase dedicated chaperone that adapts proteasome assembly to stress; Tma17p is induced upon stress; interacts with Rpt6p to assist its pairing to Rpt3p and early steps in proteasome biogenesis; associates with ribosomes; heterozygous deletion demonstrated increases in chromosome instability in a rad9 deletion background; protein abundance is decreased upon intracellular iron depletion
	CAGL0A02024g	-1.08448803987297		Ortholog(s) have role in negative regulation of ubiquitin-protein transferase activity, replicative cell aging and mitochondrion localization				YOL025W	LAG2	ECM36
	CAGL0H10362g	-1.07967423592692		Ortholog(s) have protein binding, bridging activity, role in proteasome regulatory particle assembly and cytoplasm, nucleus, ribosome localization	C4_03770W		Ortholog(s) have protein binding, bridging activity, role in proteasome regulatory particle assembly and cytoplasm, nucleus, ribosome localization	YDL110C	TMA17	ADC17	F-box protein subunit of SCF ubiquitin ligase complex; substrate-specific adaptor subunit that recruits substrates to a core ubiquitination complex
	CAGL0G04279g	-1.05880179107347		Has domain(s) with predicted transferase activity, transferring glycosyl groups activity and role in protein glycosylation
	CAGL0L06468g	-1.03761389469291		Ortholog(s) have role in SCF-dependent proteasomal ubiquitin-dependent protein catabolic process and SCF ubiquitin ligase complex localization				YDR131C	YDR131C		Peroxisomal ubiquitin conjugating enzyme; required for peroxisomal matrix protein import and peroxisome biogenesis
	CAGL0J04972g	-1.03718245904115		Has domain(s) with predicted ATP binding, protein kinase activity, protein tyrosine kinase activity and role in protein phosphorylation							Protein that activates Rub1p (NEDD8) before neddylation; acts together with Uba3p; may play a role in protein degradation
	CAGL0I10450g	-1.02536832229639	PEX4	Ortholog(s) have ubiquitin-protein transferase activity, role in protein autoubiquitination, protein import into peroxisome matrix, receptor recycling, protein monoubiquitination and peroxisome localization	C5_05430W	PEX4	Putative peroxisomal ubiquitin conjugating enzyme; regulated by Sef1, Sfu1, and Hap43; rat catheter biofilm induced; Spider biofilm induced	YGR133W	PEX4	E2 ubiquitin-protein ligase peroxin 4|UBC10|PAS2	Phosphotyrosine-specific protein phosphatase; involved in the inactivation of mitogen-activated protein kinase (MAPK) during osmolarity sensing; dephosporylates Hog1p MAPK and regulates its localization; localized to the cytoplasm
	CAGL0L08954g	-1.0233246183254		Ortholog(s) have NEDD8 activating enzyme activity and role in protein neddylation	C5_01590W		Ortholog(s) have NEDD8 activating enzyme activity, role in protein neddylation and cytosol, nucleus localization	YPL003W	ULA1	ENR2	Carboxyl methyltransferase; methylates the C terminus of the protein phosphatase 2A catalytic subunit (Pph21p or Pph22p), which is important for complex formation with regulatory subunits; required for methionine to inhibit autophagy and promote growth
	CAGL0J03256g	1.01958475259781		Ortholog(s) have MAP kinase phosphatase activity involved in regulation of osmosensory signaling pathway, MAP kinase tyrosine phosphatase activity	CR_10340W	PTP3	Putative protein tyrosine phosphatase; hypha induced; alkaline induced; regulated by Efg1, Ras1, cAMP pathways; mutants are viable; Spider biofilm induced; rat catheter biofilm repressed; flow model biofilm repressed	YER075C	PTP3	tyrosine protein phosphatase PTP3	Type II HSP40 co-chaperone that interacts with the HSP70 protein Ssa1p; shuttles between cytosol and nucleus; mediates delivery of misfolded proteins into the nucleus for degradation; involved in proteasomal degradation of misfolded cytosolic proteins; protein abundance increases in response to DNA replication stress; polyQ aggregates sequester Sis1p and interfere with clearance of misfolded prot…
	CAGL0F03201g	1.02254865124803		Ortholog(s) have protein C-terminal leucine carboxyl O-methyltransferase activity, role in C-terminal protein methylation, cellular protein complex assembly, regulation of autophagy and mitochondrion localization	CR_08170C		Ortholog(s) have protein C-terminal leucine carboxyl O-methyltransferase activity, role in C-terminal protein methylation, cellular protein complex assembly, regulation of autophagy and mitochondrion localization	YDR435C	PPM1	leucine carboxy methyltransferase	Putative metalloprotease; overproduction suppresses lethality due to expression of the dominant PET9 allele AAC2-A128P
	CAGL0H03707g	1.03158530819749		Ortholog(s) have misfolded protein binding activity	CR_06080W	SIS1	Putative Type II HSP40 co-chaperone; macrophage/pseudohyphal-repressed; heavy metal (cadmium) stress-induced; heterozygous null mutant displays sensitivity to virgineone; rat catheter biofilm induced	YNL007C	SIS1	type II HSP40 co-chaperone SIS1	Magnesium-dependent acid phosphatase; member of the haloacid dehalogenase superfamily; non-essential gene
	CAGL0I07535g	1.04967831914612		Ortholog(s) have cytosol, nucleus localization	C7_03610C		Ortholog(s) have cytosol, nucleus localization	YOL098C	YOL098C		Beta 4 subunit of the 20S proteasome; localizes to the nucleus throughout the cell cycle
	CAGL0K02035g	1.05052813347603		Ortholog(s) have acid phosphatase activity, protein tyrosine phosphatase activity, metal-dependent activity and cytosol, nucleus localization	C3_03860W		Ortholog(s) have acid phosphatase activity, protein tyrosine phosphatase activity, metal-dependent activity and cytosol, nucleus localization	YER134C	YER134C	Mg-dependent acid phosphatase|MDP-1	Evolutionarily conserved 19S regulatory particle assembly-chaperone; proteasome-interacting protein involved in the assembly of the base subcomplex of the 19S proteasome regulatory particle (RP); null mutants accumulate ubiquitinated Gcn4p and display decreased 26S proteasome stability; interacts with Rpt5p
	CAGL0H09548g	1.05335591043896		Ortholog(s) have endopeptidase activator activity and role in proteasomal ubiquitin-independent protein catabolic process, proteasome-mediated ubiquitin-dependent protein catabolic process	C5_05310W	PRE1	Putative beta 4 subunit of the 20S proteasome; Rim101-induced at acid pH; flucytosine induced; amphotericin B repressed	YER012W	PRE1	proteasome core particle subunit beta 4	ER membrane protein that plays a central role in ERAD; forms HRD complex with Hrd1p and ER-associated protein degradation (ERAD) determinants that engages in lumen to cytosol communication and coordination of ERAD events
	CAGL0A00561g	1.08610438968753		Ortholog(s) have role in proteasome regulatory particle assembly, ubiquitin-dependent protein catabolic process and cytosol, nucleus localization				YGL004C	RPN14		Cytoplasmic type 2C protein phosphatase (PP2C); identified as a high-copy number suppressor of cnb1 mpk1 synthetic lethality; overexpression decreases high-osmolarity induced Hog1p phosphorylation and kinase activity
	CAGL0J08756g	1.09383020579392		Ortholog(s) have ubiquitin-protein transferase activity and role in ER-associated ubiquitin-dependent protein catabolic process, retrograde protein transport, ER to cytosol	C6_00310W		Ortholog(s) have ubiquitin-protein transferase activity and role in ER-associated ubiquitin-dependent protein catabolic process, retrograde protein transport, ER to cytosol	YLR207W	HRD3	ubiquitin ligase complex subunit HRD3
	CAGL0J09834g	1.09411008792143		Ortholog(s) have protein serine/threonine phosphatase activity, role in protein dephosphorylation and mitochondrion localization	CR_05740C	PTC4	Type PP2C serine/threonine phosphatase; localized to mitochondria; mutation causes sensitivity to sodium, potassium and azole drugs; decreased expression in hyphae compared to yeast-form cells	YBR125C	PTC4	type 2C protein phosphatase PTC4|GCT1	Component of RQC, which mediates nascent chain degradation; RQC (ribosome quality control complex) is a ribosome-bound complex required for degradation of polypeptides arising from stalled translation; recruits alanine- and threonine-charged tRNA to the A site and directs the elongation of nascent chains independently of mRNA or 40S subunits; monitors translation stress and signals this to Hsf1p
	CAGL0M05489g	1.11916185353059		Has domain(s) with predicted mannosyltransferase activity, role in protein glycosylation and membrane localization							Protein O-mannosyltransferase; transfers mannose residues from dolichyl phosphate-D-mannose to protein serine/threonine residues; acts in a complex with Pmt3p, can instead interact with Pmt2p in some conditions; target for new antifungals
	CAGL0L08822g	1.12854568961421		Ortholog(s) have mRNA binding, ribosomal large subunit binding, tRNA binding activity and role in rescue of stalled ribosome, ribosome-associated ubiquitin-dependent protein catabolic process	CR_01820W		Ortholog(s) have mRNA binding, ribosomal large subunit binding, tRNA binding activity and role in rescue of stalled ribosome, ribosome-associated ubiquitin-dependent protein catabolic process	YPL009C	RQC2	TAE2	Non-ATPase base subunit of the 19S RP of the 26S proteasome; may participate in the recognition of several ligands of the proteasome; contains a leucine-rich repeat (LRR) domain, a site for protein-protein interactions; RP is the acronym for regulatory particle
	CAGL0L07172g	1.15474328560611		Ortholog(s) have dolichyl-phosphate-mannose-protein mannosyltransferase Pmt5p-Pmt2p dimer complex, dolichyl-phosphate-mannose-protein mannosyltransferase Pmt5p-Pmt3p dimer complex localization				YDL093W	PMT5	putative dolichyl-phosphate-mannose-protein mannosyltransferase PMT5	Catalytic subunit of the NatB N-terminal acetyltransferase; NatB catalyzes acetylation of the amino-terminal methionine residues of all proteins beginning with Met-Asp or Met-Glu and of some proteins beginning with Met-Asn or Met-Met
	CAGL0J00605g	1.16963980810378		Ortholog(s) have protein binding, bridging activity and role in proteasome-mediated ubiquitin-dependent protein catabolic process	C1_13300C	RPN1	Putative 19S regulatory particle of the 26S proteasome; regulated by Gcn2p and Gcn4p	YHR027C	RPN1	proteasome regulatory particle base subunit RPN1|NAS1|HRD2	Scaffold-type E3 ligase; required for cullin neddylation and ubiquitin ligase activation; contains a ubiquitin-binding domain (UBA) for ubiquitin and Nedd8 (Rub1p) interaction and a PONY domain involved in cullin binding and neddylation
	CAGL0D04796g	1.17319143791364		Ortholog(s) have peptide alpha-N-acetyltransferase activity	C1_06650W		Ortholog(s) have peptide alpha-N-acetyltransferase activity	YPR131C	NAT3	peptide alpha-N-acetyltransferase complex B subunit NAT3|RAD56|NAA20	Ubiquitin hydrolase; deubiquitinates intralumenal vesicle (ILVs) cargo proteins; required for recycling ubiquitin from proteasome-bound ubiquitinated intermediates, acts at the late endosome/prevacuolar compartment to recover ubiquitin from ubiquitinated membrane proteins destined for the vacuole; DOA4 has a paralog, UBP5, that arose from the whole genome duplication
	CAGL0M04257g	1.17505687703377		Ortholog(s) have NEDD8 transferase activity, cullin family protein binding, protein binding, bridging, ubiquitin binding, ubiquitin conjugating enzyme binding activity	C3_06800C		Ortholog(s) have NEDD8 transferase activity, cullin family protein binding, protein binding, bridging, ubiquitin binding, ubiquitin conjugating enzyme binding activity	YLR128W	DCN1	NEDD8 ligase DCN1	S-adenosylmethionine-dependent methyltransferase; seven-beta-strand lysine methyltransferase which trimethylates translation elongation factor EF2 (Eft1p and Eft2p) at lysine 509; green fluorescent protein (GFP)-fusion protein localizes to the cytoplasm; ortholog of human gene FAM86A
	CAGL0G05247g	1.17520947449788		Ortholog(s) have thiol-dependent ubiquitin-specific protease activity	C1_14000C	DOA4	Ortholog of S. cerevisiae Doa4;, a ubiquitin hydrolase involved in recycling ubiquitin from proteasome-bound ubiquitinated intermediates; oxidative stress-induced via Cap1; mutants are viable	YDR069C	DOA4	ubiquitin-specific protease DOA4|UBP4|SSV7|NPI2|MUT4|DOS1	RING domain E3 ubiquitin ligase; involved in ubiquitin-mediated degradation of non-stop proteins and translationally stalled ER membrane proteins; component of ribosome-bound RQC (ribosome quality control) complex; degrades products of mRNAs lacking a termination codon regardless of a poly(A) tail; functional connections to chromatin modification; homolog of mouse Listerin, mutations in which rep…
	CAGL0M00572g	1.19792891548742		Ortholog(s) have protein-lysine N-methyltransferase activity, role in peptidyl-lysine trimethylation and cytoplasm localization	C2_00620C		Ortholog(s) have protein-lysine N-methyltransferase activity, role in peptidyl-lysine trimethylation and cytoplasm localization	YJR129C	EFM3	protein-lysine N-methyltransferase	Apyrase with wide substrate specificity; helps prevent inhibition of glycosylation by hydrolyzing nucleoside tri- and diphosphates that inhibit glycotransferases; partially redundant with Gda1p; mediates adenovirus E4orf4-induced toxicity
	CAGL0H02651g	1.20962857066107		Ortholog(s) have ribosomal large subunit binding, ubiquitin-protein transferase activity	C6_04060W		Ortholog(s) have ribosomal large subunit binding, ubiquitin-protein transferase activity	YMR247C	RKR1	ubiquitin-protein ligase RKR1|LTN1	Ubiquitin-binding protein; functions as ubiquitin-Atg8p adaptor in ubiquitin-dependent autophagy; serves as proteaphagy receptor for inactivated 26S proteasomes; contains CUE domain that binds ubiquitin, which may facilitate intramolecular monoubiquitination; CUE5 has a paralog, DON1, that arose from the whole genome duplication; human TOLLIP is a functional CUE-domain homolog, can complement yea…
	CAGL0H09746g	1.23426555562181		Ortholog(s) have ATPase activity, GTPase activity, adenosine-diphosphatase activity, cytidine diphosphatase activity, guanosine-diphosphatase activity, uridine-diphosphatase activity	C4_06230C		Ortholog(s) have ATPase activity, GTPase activity, adenosine-diphosphatase activity, cytidine diphosphatase activity, guanosine-diphosphatase activity, uridine-diphosphatase activity	YER005W	YND1	apyrase|YEJ5|APY1	v-SNARE binding protein; facilitates specific protein retrieval from a late endosome to the Golgi; modulates arginine uptake, possible role in mediating pH homeostasis between the vacuole and plasma membrane H(+)-ATPase; contributes to prion curing; preferentially expressed after severe ethanol stress
	CAGL0L09933g	1.24409735190166		Ortholog(s) have protein binding, bridging, ubiquitin binding activity, role in ubiquitin-dependent protein catabolic process and cytoplasm localization	C1_05170C	CUE5	Predicted ubiquitin-binding protein; rat catheter biofilm repressed	YOR042W	CUE5	ubiquitin-binding protein CUE5	Class I histone deacetylase (HDAC) family member; deacetylates Smc3p on lysine residues at anaphase onset; has sequence similarity to Hda1p, Rpd3p, Hos2p, and Hos3p; interacts with the Tup1p-Ssn6p corepressor complex
	CAGL0I10010g	1.24896834270579		Ortholog(s) have SNARE binding, chaperone binding activity and role in amino acid transport, intracellular protein transport, protein folding, protein localization to nucleus, regulation of pH, retrograde transport, endosome to Golgi				YGR142W	BTN2		Alpha 2 subunit of the 20S proteasome
	CAGL0D01430g	1.26160449174882		Ortholog(s) have protein deacetylase activity and role in histone H4 deacetylation, peptidyl-lysine deacetylation, positive regulation of transcription from RNA polymerase II promoter, transfer RNA gene-mediated silencing	C4_06010C	HOS1	Histone deacetylase; similar to S. cerevisiae Hos1; has conserved deacetylation motif; slightly greater expression in white cells than in opaque cells	YPR068C	HOS1	histone deacetylase|CST3	Essential non-ATPase regulatory subunit of the 26S proteasome lid; similar to the p58 subunit of the human 26S proteasome; temperature-sensitive alleles cause metaphase arrest, suggesting a role for the proteasome in cell cycle control
	CAGL0H07007g	1.26212566184438		Ortholog(s) have role in proteasomal ubiquitin-independent protein catabolic process, proteasome-mediated ubiquitin-dependent protein catabolic process	CR_09380W	PRE8	Putative alpha-2_sc subunit of proteasome; macrophage-induced protein; regulated by Gcn2p and Gcn4p; transcription is positively regulated by Tbf1p; stationary phase enriched protein	YML092C	PRE8	proteasome core particle subunit alpha 2	Member of conserved ER transmembrane complex; required for efficient folding of proteins in the ER; null mutant displays induction of the unfolded protein response; homologous to worm Y57G7A.10/EMC-2, fly CG17556, human TTC35
	CAGL0I08239g	1.26297666726359		Ortholog(s) have proteasome regulatory particle, lid subcomplex localization	C1_03520W	RPN3	Putative non-ATPase regulatory subunit of the 26S proteasome lid; amphotericin B repressed; oxidative stress-induced via Cap1p	YER021W	RPN3	proteasome regulatory particle lid subunit RPN3|SUN2	Cyclin associated with protein kinase Kin28p; Kin28p is the TFIIH-associated carboxy-terminal domain (CTD) kinase involved in transcription initiation at RNA polymerase II promoters; human homolog CCNH allows growth of yeast ccl1 temperature-sensitive mutant at restrictive temperature
	CAGL0M09185g	1.3324262873998		Ortholog(s) have role in protein folding in endoplasmic reticulum and ER membrane protein complex, cell division site, cytosol, mitotic spindle pole body, nucleus localization	C5_04550W		Ortholog(s) have role in protein folding in endoplasmic reticulum and ER membrane protein complex, cell division site, cytosol, mitotic spindle pole body, nucleus localization	YJR088C	EMC2		Subunit of the NuA3 histone acetyltransferase complex; this complex acetylates histone H3; contains PHD finger domain that interacts with methylated histone H3
	CAGL0K05115g	1.33283447740633		Ortholog(s) have cyclin-dependent protein kinase activating kinase regulator activity, cyclin-dependent protein serine/threonine kinase activator activity	C1_01820C		Ortholog(s) have cyclin-dependent protein kinase activating kinase regulator activity, cyclin-dependent protein serine/threonine kinase activator activity	YPR025C	CCL1	TFIIH complex kinase subunit CCL1	Non-catalytic subunit of the NatC N-terminal acetyltransferase; required for replication of dsRNA virus; expression is glucose-repressible; human NatC ortholog, Naa35, requires co-expression of the human catalytic subunit, Naa30, to functionally complement the null allele
	CAGL0K05269g	1.33821438371557		Ortholog(s) have methylated histone binding activity, role in histone acetylation and NuA3a histone acetyltransferase complex, NuA3b histone acetyltransferase complex, cytoplasm localization	C3_04540C		Putative histone acetyltransferase complex subunit; induced upon low-level peroxide stress; Spider biofilm induced	YPR031W	NTO1
	CAGL0E04136g	1.36903874698161		Ortholog(s) have peptide alpha-N-acetyltransferase activity, role in N-terminal protein amino acid acetylation, macroautophagy and NatC complex localization	C3_02210C		Non-catalytic subunit of N-terminal acetyltransferase of the NatC type; flow model biofilm repressed	YEL053C	MAK10	NAA35	Subunit of TFIIH and nucleotide excision repair factor 3 complexes; involved in transcription initiation, required for nucleotide excision repair; ring finger protein similar to mammalian CAK and TFIIH subunit
	CAGL0C03938g	1.3877136821271		Has domain(s) with predicted transferase activity, transferring glycosyl groups activity and role in protein glycosylation							Putative protein of unknown function; mutant is deficient in cell wall mannosylphosphate and has long chronological lifespan; genetic interactions suggest a role in ER-associated protein degradation (ERAD); SWAT-GFP fusion protein localizes to the endoplasmic reticulum and vacuole, while mCherry fusion localizes to just the vacuole
	CAGL0K06369g	1.47116633665551		Ortholog(s) have cyclin-dependent protein serine/threonine kinase activator activity	C5_00690C	TFB3	Putative C3HC4 zinc finger transcription factor; transcript positively regulated by Tbf1; Spider biofilm induced	YDR460W	TFB3	TFIIH/NER complex subunit TFB3|RIG2	Member of the protein disulfide isomerase (PDI) family; interacts with and inhibits the chaperone activity of Cne1p; MPD1 overexpression in a pdi1 null mutant suppresses defects in Pdi1p functions such as carboxypeptidase Y maturation
	CAGL0M11572g	1.50413537524999		Ortholog(s) have role in ER-associated ubiquitin-dependent protein catabolic process and fungal-type vacuole localization	CR_05800C		Ortholog(s) have role in ER-associated ubiquitin-dependent protein catabolic process and fungal-type vacuole localization	YLR104W	LCL2		Subunit of the HDA1 histone deacetylase complex; possibly tetrameric trichostatin A-sensitive class II histone deacetylase complex contains Hda1p homodimer and an Hda2p-Hda3p heterodimer; required for the activity of the complex; relocalizes to the cytosol in response to hypoxia; similar to Hda2p
	CAGL0M04741g	1.56517101326578		Ortholog(s) have protein disulfide isomerase activity, protein disulfide oxidoreductase activity, protein-disulfide reductase (glutathione) activity, role in protein folding and endoplasmic reticulum, fungal-type vacuole localization	C5_04340W		Ortholog(s) have protein disulfide isomerase activity, protein disulfide oxidoreductase activity, protein-disulfide reductase (glutathione) activity, role in protein folding and endoplasmic reticulum, fungal-type vacuole localization	YOR288C	MPD1	protein disulfide isomerase MPD1	Essential non-ATPase regulatory subunit of the 26S proteasome; has similarity to the human p40 proteasomal subunit and to another S. cerevisiae regulatory subunit, Rpn11p
	CAGL0G09867g	1.6976168794913		Ortholog(s) have DNA binding, chromatin binding, histone deacetylase activity	CR_09490W		Ortholog(s) have DNA binding, chromatin binding, histone deacetylase activity	YPR179C	HDA3	PLO1	Alpha subunit of Type II geranylgeranyltransferase; required for vesicular transport between the endoplasmic reticulum and the Golgi; provides a membrane attachment moiety to Rab-like proteins Ypt1p and Sec4p
	CAGL0K08866g	1.70758466668179		Putative non-ATPase regulatory subunit of 26S proteasome; gene is upregulated in azole-resistant strain	C5_02030W	RPN8	Putative regulatory subunit of the 26S proteasome; mutation confers hypersensitivity to amphotericin B; regulated by Mig1, Gcn2 and Gcn4; Spider biofilm repressed	YOR261C	RPN8	proteasome regulatory particle lid subunit RPN8	Subunit of the Anaphase-Promoting Complex/Cyclosome (APC/C); APC/C is a ubiquitin-protein ligase required for degradation of anaphase inhibitors, including mitotic cyclins, during the metaphase/anaphase transition; component of the platform domain of the APC/C, based on structural analysis; relative distribution to the nucleus increases upon DNA replication stress
	CAGL0J01067g	1.75407240271688		Ortholog(s) have Rab geranylgeranyltransferase activity and role in ER to Golgi vesicle-mediated transport, protein geranylgeranylation, protein targeting to membrane	C1_04070C	BET4	Ortholog(s) have Rab geranylgeranyltransferase activity and role in ER to Golgi vesicle-mediated transport, protein geranylgeranylation, protein targeting to membrane	YJL031C	BET4	Rab geranylgeranyltransferase BET4
	CAGL0B01859g	1.82463801698391		Ortholog(s) have ubiquitin-protein transferase activity, role in anaphase-promoting complex-dependent catabolic process, protein ubiquitination and anaphase-promoting complex, nuclear periphery localization	C5_00060C		Ortholog(s) have ubiquitin-protein transferase activity, role in anaphase-promoting complex-dependent catabolic process, protein ubiquitination and anaphase-promoting complex, nuclear periphery localization	YDR118W	APC4	anaphase promoting complex subunit 4	Protein phosphotyrosine phosphatase of unknown cellular role; activated by adenine
	CAGL0C03916g	1.83287463884374		Has domain(s) with predicted transferase activity, transferring glycosyl groups activity and role in protein glycosylation
	CAGL0D01320g	1.90854338981529		Ortholog(s) have non-membrane spanning protein tyrosine phosphatase activity, role in peptidyl-tyrosine dephosphorylation and cytosol, nucleus localization	C1_08260C	LTP1	Putative protein phosphatase of the PTP family (tyrosine-specific), similar to S. cerevisiae Ltp1p	YPR073C	LTP1	tyrosine protein phosphatase LTP1	Protein of unknown function; has a CUE domain that binds ubiquitin, which may facilitate intramolecular monoubiquitination
	CAGL0L13266g	2.15842498683902		Has domain(s) with predicted identical protein binding, serine-type endopeptidase activity and role in negative regulation of catalytic activity, proteolysis							Chaperone with a role in facilitating mitochondrial protein import; ascomycete-specific member of the DnaJ-like family, closely related to Ydj1p; predicted to be C-terminally prenylated; the authentic, non-tagged protein is detected in highly purified mitochondria in high-throughput studies
	CAGL0F07425g	2.83366481181796		Ortholog(s) have ubiquitin binding activity and cytoplasm localization	C2_07860W		Ortholog(s) have ubiquitin binding activity and cytoplasm localization	YGL110C	CUE3
	CAGL0L12276g	4.17728310599595		Ortholog(s) have ATPase activator activity, role in protein import into mitochondrial matrix and integral component of mitochondrial outer membrane, nucleus localization	C5_00350C		Putative DnaJ-like chaperone; Hap43-repressed gene	YLR090W	XDJ1		PUF family mRNA-binding protein; Pumilio homology domain confers RNA binding activity; preferentially binds mRNAs encoding membrane-associated proteins; binding site composed of two UAAU tetranucleotides, separated by a 3-nt linker; PUF2 has a paralog, JSN1, that arose from the whole genome duplication
RNA metabolism and ribossomal biogenesis	CAGL0H08778g	-2.47912086917607		Ortholog(s) have mRNA binding activity, role in nuclear-transcribed mRNA catabolic process, deadenylation-dependent decay and cytoplasm localization				YPR042C	PUF2		Vacuolar RNase of the T(2) family; relocalizes to the cytosol where it cleaves tRNAs upon oxidative or stationary phase stress; required for tRNA-specific translational pausing suring oxidative stress; promotes apoptosis under stress conditions and this function is independent of Rny1p catalytic activity
	CAGL0F04675r	-2.12292936464675	tA(AGC)2	tRNA-Ala, predicted by tRNAscan-SE; AGC anticodon							tRNAHis guanylyltransferase; adds a guanosine residue to the 5' end of tRNAH is after transcription and RNase P cleavage; can also catalyze reverse (3'-5') polymerization with certain substrates in a template-dependent reaction; couples nuclear division and migration to cell budding and cytokinesis; essential enzyme conserved among eukaryotes
	CAGL0J06820g	-2.09285032918176		Ortholog(s) have endoribonuclease activity, role in RNA catabolic process, apoptotic process, cell morphogenesis and cytosol, extracellular region, fungal-type vacuole localization	C5_04400W	RNY11	Ortholog(s) have endoribonuclease activity, role in RNA catabolic process, apoptotic process, cell morphogenesis and cytosol, extracellular region, fungal-type vacuole localization	YPL123C	RNY1	ribonuclease T2
	CAGL0J00209g	-2.0399797355439		Ortholog(s) have tRNA guanylyltransferase activity, role in tRNA modification and cytosol, nucleus localization	C7_00560C	THG1	tRNA guanylyltransferase, with role in tRNA modification; catalyzes reverse (3'-5') nucleotide polymerization	YGR024C	THG1	tRNA guanylyltransferase
	CAGL0G09757g	-2.03310117463182		Has domain(s) with predicted DNA binding, RNA polymerase II transcription factor activity, sequence-specific DNA binding, zinc ion binding activity and role in regulation of transcription, DNA-templated, transcription, DNA-templated							3'-5' exonuclease specific for poly-A RNAs; has a domain similar to a magnesium-dependent endonuclease motif in mRNA deadenylase Ccr4p; similar to Ngl1p; NGL3 has a paralog, NGL2, that arose from the whole genome duplication
	CAGL0D05390r	-1.98116004836472	tG(GCC)3	tRNA-Gly, predicted by tRNAscan-SE; GCC anticodon							Subunit of a heterodimeric NC2 transcription regulator complex; complex binds to TBP and can repress transcription by preventing preinitiation complex assembly or stimulate activated transcription; homologous to human NC2beta; complex also includes Bur6p
	CAGL0B02387g	-1.71927006184745		Ortholog(s) have poly(A)-specific ribonuclease activity and role in polyadenylation-dependent RNA catabolic process				YML118W	NGL3	3'-5' poly(A) RNA exonuclease
	CAGL0M01474g	-1.61578837105465		Ortholog(s) have RNA polymerase II transcription factor activity, TBP-class protein binding, RNA polymerase II transcription factor activity and TBP-class protein binding, more	C2_02810C	NCB2	Beta subunit of NC2, heterodimeric regulator of transcription; activates CDR1 transcription; possibly an essential gene, disruptants not obtained by UAU1 method; conditional mutants show decreased susceptibility to azoles	YDR397C	NCB2	negative cofactor 2 transcription regulator complex subunit NCB2|YDR1	Member of the NineTeen Complex (NTC); this complex contains Prp19p and stabilizes U6 snRNA in catalytic forms of the spliceosome containing U2, U5, and U6 snRNAs; binds directly to U6 snRNA; similar to S. pombe Cwf2
	CAGL0D05368g	-1.58553109506094		Has domain(s) with predicted RNA polymerase II transcription cofactor activity, role in regulation of transcription from RNA polymerase II promoter and mediator complex localization
	CAGL0J09592g	-1.57186450747431		Ortholog(s) have U6 snRNA binding, pre-mRNA binding activity and role in mRNA cis splicing, via spliceosome, spliceosomal snRNP assembly	C1_11280W		Ortholog(s) have U6 snRNA binding, pre-mRNA binding activity and role in mRNA cis splicing, via spliceosome, spliceosomal snRNP assembly	YDL209C	CWC2	NTC40	RNA-binding subunit of Nrd1 complex; complex interacts with exosome to mediate 3'-end formation of some mRNAs, snRNAs, snoRNAs, and CUTs; interacts with CTD of RNA pol II large subunit Rpo21p at phosphorylated Ser5 to direct transcription termination of non-polyadenylated transcripts; H3K4 trimethylation of transcribed regions by Set1p enhances recruitment of Nrd1p to those sites; role in regulat…
	CAGL0L13398r	-1.42948302515902	RDN18-1	18S rRNA
	CAGL0J07810g	-1.39390118486554		Ortholog(s) have mRNA binding, protein domain specific binding, transcription regulatory region RNA binding activity	C5_00790C		Putative RNA-binding protein; transcript is upregulated in an RHE model of oral candidiasis	YNL251C	NRD1	Nrd1 complex RNA-binding subunit
	CaglfMr14	-1.3525704819064	SSU	Mitochondrial 15S rRNA of the small ribosomal subunit							Protein involved in transcription initiation; functions at TATA-containing promoters; associates with the basal transcription factor TFIID; contains two bromodomains; corresponds to the C-terminal region of mammalian TAF1; redundant with Bdf2p; BDF1 has a paralog, BDF2, that arose from the whole genome duplication
	CAGL0B02137r	-1.29172010324741		U5 snRNA							Transcription factor TFIIB; a general transcription factor required for transcription initiation and start site selection by RNA polymerase II
	CAGL0C02541g	-1.25639394419112		Ortholog(s) have TFIID-class transcription factor binding, chromatin binding, core promoter binding, lysine-acetylated histone binding activity	C5_00200C	BDF1	Bromodomain transcription factor; repressed upon adherence to polystyrene; reduced mRNA abundance detected in null mutant; macrophage/pseudohyphal-repressed; possibly essential, disruptants not obtained by UAU1 method	YLR399C	BDF1	chromatin-binding protein BDF1	Component of the SF3b subcomplex of the U2 snRNP; zinc cluster protein involved in pre-mRNA splicing and cycloheximide resistance
	CAGL0K07964g	-1.22524522726777		Ortholog(s) have RNA polymerase II core binding, RNA polymerase II transcription factor activity, TBP-class protein binding, involved in preinitiation complex assembly and TBP-class protein binding, more	C1_03560C	SUA71	Transcription factor TFIIB; required for transcription initiation and start site selection by RNA polymerase II; downregulated during planktonic growth, whereas related SUA72 is induced; induced by Tbf1; rat catheter, Spider biofilm induced	YPR086W	SUA7	transcription factor TFIIB|TFIIB|SOH4
	CAGL0K08074g	-1.22036189714178		Ortholog(s) have role in mRNA cis splicing, via spliceosome, response to xenobiotic stimulus, spliceosomal complex assembly and U2 snRNP, cytosol localization	C2_06790W		Putative pre-mRNA-splicing factor; decreased transcription is observed upon benomyl treatment	YPR094W	RDS3	U2 snRNP complex subunit RDS3	Flap-structured DNA-binding and RNA-binding protein; stimulates deadenylation-dependent mRNA degradation mediated by the CCR4-NOT deadenylase complex; member of the Smaug (Smg) family of post-transcriptional regulators which bind RNA through a conserved sterile alpha motif (SAM) domain that interacts with Smg recognition element (SREs) containing transcripts; stimulates Dna2p endonuclease activity
	CaglfMr13	-1.16527089048759	LSU	Mitochondrial 21S rRNA of the large ribosomal subunit							RNA polymerase subunit AC19; common to RNA polymerases I and III
	CAGL0K09922g	-1.13935781396855		Ortholog(s) have RNA binding, flap-structured DNA binding activity, role in nuclear-transcribed mRNA poly(A) tail shortening, positive regulation of endodeoxyribonuclease activity and P-body, cytosol, nucleus localization	C1_02850W		Ortholog(s) have RNA binding, flap-structured DNA binding activity, role in nuclear-transcribed mRNA poly(A) tail shortening, positive regulation of endodeoxyribonuclease activity and P-body, cytosol, nucleus localization	YOR359W	VTS1		S-adenosylmethionine-dependent methyltransferase; methylates translational release factor Mrf1p; similar to E.coli PrmC; is not an essential gene
	CAGL0L03872g	-1.12959198572238		Ortholog(s) have RNA polymerase I activity, RNA polymerase III activity and role in tRNA transcription from RNA polymerase III promoter, transcription from RNA polymerase I promoter	CR_02520W	RPC19	Putative RNA polymerases I and III subunit AC19; Hap43-induced; rat catheter biofilm induced	YNL113W	RPC19	DNA-directed RNA polymerase core subunit RPC19|AC19	Subunit of the RNA polymerase II mediator complex; associates with core polymerase subunits to form the RNA polymerase II holoenzyme; affects transcription by acting as target of activators and repressors; forms part of the tail domain of mediator
	CAGL0J09988g	-1.12282035511298		Ortholog(s) have S-adenosylmethionine-dependent methyltransferase activity, role in translational readthrough and mitochondrion localization	CR_04150W		Ortholog(s) have S-adenosylmethionine-dependent methyltransferase activity, role in translational readthrough and mitochondrion localization	YNL063W	MTQ1	S-adenosylmethionine-dependent methyltransferase	Component of the core factor (CF) rDNA transcription factor complex; CF is required for transcription of 35S rRNA genes by RNA polymerase I and is composed of Rrn6p, Rrn7p, and Rrn11p
	CAGL0F00803g	-1.12105105119744	GAL11B	Component of the transcriptional Mediator complex that provides interfaces between RNA polymerase II and upstream activator proteins; one of the two Gal11p homologs of S. cerevisiae Gal11p present in C. glabrata	C1_08270C	MED15	RNA polymerase II mediator complex subunit; possibly an essential gene, disruptants not obtained by UAU1 method	YOL051W	GAL11	MED15|ABE1|SPT13|SDS4|RAR3	Protein that facilitates ribosomal subunit dissociation; Dom34-Hbs1 complex and Rli1p have roles in dissociating inactive ribosomes to facilitate translation restart, particularly ribosomes stalled in 3' UTRs; required for RNA cleavage in no-go decay, but reports conflict on endonuclease activity; Pelota ortholog; protein abundance increases in response to DNA replication stress; DOM34 has a para…
	CAGL0D03410g	-1.11917831121221		Ortholog(s) have RNA polymerase I CORE element sequence-specific DNA binding, TBP-class protein binding activity and role in transcription of nuclear large rRNA transcript from RNA polymerase I promoter	C2_02630W		Putative transcription factor component of the core factor (CF) rDNA transcription factor complex; Spider biofilm induced	YJL025W	RRN7		Conserved 90S pre-ribosomal component; essential for proper endonucleolytic cleavage of the 35 S rRNA precursor at A0, A1, and A2 sites; contains eight WD-repeats; PWP2 deletion leads to defects in cell cycle and bud morphogenesis
	CAGL0B04675g	-1.09767549892163		Ortholog(s) have RNA binding, endoribonuclease activity, ribosome binding activity	CR_03070W	DOM34	Endonuclease involved in regulation of translation; stimulates translation of protein O-mannosyltransferase family which includes PMT1, PMT2, PMT4, PMT5, and PMT6; peloto ortholog; Hap43-repressed gene	YNL001W	DOM34	ribosome dissociation factor DOM34	ATP-dependent RNA helicase of the DEAD-box protein family; has strong preference for dsRNA; interacts with YRA1; required for assembly of Yra1p, Nab2p and Mex67p onto mRNA and formation of nuclear mRNP; involved in mRNA decay and rRNA processing; may be involved in suppression of transcription from cryptic initiation sites
	CAGL0K09284g	-1.06395164820679		Ortholog(s) have mRNA binding, snoRNA binding activity	CR_00800C	PWP2	Putative 90S pre-ribosomal component; repressed in core stress response; repressed by prostaglandins; physically interacts with TAP-tagged Nop1; Hap43-induced	YCR057C	PWP2	snoRNA-binding rRNA-processing protein PWP2|UTP1|YCR058C|YCR055C	Negative regulator of transcription elongation; contains a TFIIS-like domain that associates with chromatin and a PHD domain that interacts with H3K4me3; multicopy suppressor of temperature-sensitive ess1 mutations, binds RNA polymerase II large subunit
	CAGL0L03846g	-1.04905497040271		Ortholog(s) have ATP-dependent RNA helicase activity	CR_02530W	DBP2	Putative DEAD-box family ATP-dependent RNA helicase; flucytosine induced; repressed in core stress response	YNL112W	DBP2	DEAD-box ATP-dependent RNA helicase DBP2	Non-essential hydrolase involved in mRNA decapping; activates Xrn1p; may function in a feedback mechanism to regulate deadenylation, contains pyrophosphatase activity and a HIT (histidine triad) motif; acts as inhibitor of neutral trehalase Nth1p; required for growth on glycerol medium; protein abundance increases in response to DNA replication stress; DCS1 has a paralog, DCS2, that arose from th…
	CAGL0M10285g	-1.04668073095194		Ortholog(s) have chromatin binding, methylated histone binding activity and role in negative regulation of transcription from RNA polymerase II promoter	C5_02620C		Ortholog(s) have chromatin binding, methylated histone binding activity and role in negative regulation of transcription from RNA polymerase II promoter	YKL005C	BYE1		Component of the RSC chromatin remodeling complex; interacts with Rsc3p, Rsc30p, Npl6p, and Htl1p to form a module important for a broad range of RSC functions
	CAGL0C03113g	-1.04428476433299		Ortholog(s) have RNA 7-methylguanosine cap binding, exoribonuclease activator activity, m7G(5')pppN diphosphatase activity	C7_01190W		Ortholog(s) have RNA 7-methylguanosine cap binding, exoribonuclease activator activity, m7G(5')pppN diphosphatase activity	YLR270W	DCS1	5'-(N(7)-methyl 5'-triphosphoguanosine)-(mRNA) diphosphatase|DcpS	Mitochondrial ribosomal protein of the small subunit
	CAGL0E02761g	-1.01930097943		Ortholog(s) have DNA translocase activity, role in ATP-dependent chromatin remodeling, nucleosome disassembly, transcription elongation from RNA polymerase II promoter and RSC complex localization				YBL006C	LDB7	RSC14	One of two isoforms of the gamma subunit of eEF1B; stimulates the release of GDP from eEF1A (Tef1p/Tef2p) post association with the ribosomal complex with eEF1Balpha subunit; nuclear protein required for transcription of MXR1; binds the MXR1 promoter in the presence of other nuclear factors; binds calcium and phospholipids
	CAGL0D04158g	1.01436731858327		Ortholog(s) have structural constituent of ribosome activity and mitochondrial small ribosomal subunit localization	C1_08920W		Ortholog(s) have structural constituent of ribosome activity and mitochondrial small ribosomal subunit localization	YIL093C	RSM25	mitochondrial 37S ribosomal protein RSM25	Zinc knuckle protein; involved in nuclear RNA processing and degradation as a component of the TRAMP complex; stimulates the poly(A) polymerase activity of Pap2p in vitro; AIR1 has a paralog, AIR2, that arose from the whole genome duplication; although Air1p and Air2p are homologous TRAMP subunits, they have nonredundant roles in regulation of substrate specificity of the exosome
	CAGL0L12760g	1.02045476664606		Ortholog(s) have calcium ion binding, core promoter binding, guanyl-nucleotide exchange factor activity, phospholipid binding, transcription factor activity, sequence-specific DNA binding activity	C3_06010W	CAM1	Putative translation elongation factor eEF1 gamma; protein level decreased in stationary phase cultures; Spider biofilm repressed	YPL048W	CAM1	translation elongation factor EF1B gamma|CPBP|TEF3	Putative ATP-dependent RNA helicase of the DEAD-box protein family; mutants show reduced stability of the 40S ribosomal subunit scanning through 5' untranslated regions of mRNAs; protein abundance increases in response to DNA replication stress; DBP1 has a paralog, DED1, that arose from the whole genome duplication
	CAGL0J09460g	1.03300638511015		Ortholog(s) have polynucleotide adenylyltransferase activity				YIL079C	AIR1	TRAMP complex RNA-binding subunit	Subunit of U3-containing Small Subunit (SSU) processome complex; involved in production of 18S rRNA and assembly of small ribosomal subunit
	CAGL0J06908g	1.03850560982679		Ortholog(s) have mRNA binding activity, role in translational initiation and cytoplasm localization				YPL119C	DBP1	putative DEAD-box ATP-dependent RNA helicase DBP1|LPH8	tRNA ligase; required for tRNA splicing and for both splicing and translation of HAC1 mRNA in the UPR; has phosphodiesterase, polynucleotide kinase, and ligase activities; localized at the inner nuclear envelope and partially to polysomes
	CAGL0F07645g	1.04012845196817		Ortholog(s) have role in endonucleolytic cleavage in 5'-ETS of tricistronic rRNA transcript (SSU-rRNA, 5.8S rRNA and LSU-rRNA), more	CR_03360W		Ortholog(s) have role in endonucleolytic cleavage in 5'-ETS of tricistronic rRNA transcript (SSU-rRNA, 5.8S rRNA and LSU-rRNA), more	YKL099C	UTP11	rRNA-processing protein UTP11	Component of the CCR4-NOT core complex, involved in mRNA decapping; involved intranscription initiation and elongation and in mRNA degradation; conserved lysine in human homolog of Not5p and Not3p is mutated in cancers
	CAGL0M03091g	1.05576602962866		Ortholog(s) have 2',3'-cyclic-nucleotide 3'-phosphodiesterase activity, GTP-dependent polyribonucleotide 5'-hydroxyl-kinase activity, RNA ligase (ATP) activity	C7_02060W	LIG1	tRNA ligase; functional homolog of S. cerevisiae Trl1	YJL087C	TRL1	tRNA ligase|RLG1|LIG1	Mitochondrial glutamyl-tRNA synthetase; predicted to be palmitoylated
	CAGL0D01342g	1.06270384065379		Ortholog(s) have ubiquitin-protein transferase activity	C1_08300W	NOT5	Protein with similarity to S. cerevisiae Not5p, a member of the transcription regulatory CCR4-NOT complex; required for hyphal growth; antigenic during human oral infection; greater expression in yeast-form cells than hyphae	YPR072W	NOT5	CCR4-NOT core subunit NOT5	Huge dynein-related AAA-type ATPase (midasin); forms extended pre-60S particle with the Rix1 complex (Rix1p-Ipi1p-Ipi3p); acts in removal of ribosomal biogenesis factors at successive steps of pre-60S assembly and export from nucleus
	CAGL0F01133g	1.09883995906945		Ortholog(s) have role in mitochondrial translation and mitochondrion localization	CR_03110W		Ortholog(s) have role in mitochondrial translation and mitochondrion localization	YOL033W	MSE1	glutamate--tRNA ligase MSE1	Subunit of the mRNA cleavage and polyadenlylation factor (CPF); required for pre-mRNA cleavage, polyadenylation and poly(A) site recognition, 43% similarity with the mammalian CPSF-100 protein.
	CAGL0M11616g	1.09946891768681		Ortholog(s) have role in rRNA processing, ribosomal large subunit assembly and mitochondrion, mitotic spindle pole body, nucleoplasm, preribosome, large subunit precursor localization	C4_00970C	MDN1	Putative midasin, a very large dynein-related AAA-type ATPase; induced during the mating process	YLR106C	MDN1	AAA family ATPase midasin|REA1	tRNA methyltransferase required for synthesis of wybutosine; a modified guanosine found at the 3'-position adjacent to the anticodon of phenylalanine tRNA which supports reading frame maintenance by stabilizing codon-anticodon interactions
	CAGL0D02332g	1.1075162252834		Ortholog(s) have RNA binding activity, role in mRNA polyadenylation, pre-mRNA cleavage required for polyadenylation, response to drug and mRNA cleavage and polyadenylation specificity factor complex localization	C3_03260W		Putative mRNA cleavage and polyadenlylation factor; heterozygous null mutant exhibits hypersensitivity to parnafungin and cordycepin in the C. albicans fitness test	YLR115W	CFT2	cleavage polyadenylation factor subunit CFT2|YDH1	Mitochondrial ribosomal protein of the small subunit; has similarity to mammalian apoptosis mediator proteins; null mutation prevents induction of apoptosis by overproduction of metacaspase Mca1p
	CAGL0D06336g	1.12898595661755		Ortholog(s) have tRNA methyltransferase activity, role in tRNA methylation, wybutosine biosynthetic process and cytosol, nucleus localization	CR_03160W		Ortholog(s) have tRNA methyltransferase activity, role in tRNA methylation, wybutosine biosynthetic process and cytosol, nucleus localization	YGL050W	TYW3	tRNA methyltransferase TYW3	RNA-dependent DExD/H-box ATPase; required for activation of spliceosome before first transesterification step in RNA splicing; implicated in rearranging and proofreading snRNA structure in catalytic activation of spliceosome; ortholog of human protein DHX16
	CAGL0I09548g	1.13401900462711		Ortholog(s) have structural constituent of ribosome activity and mitochondrial small ribosomal subunit localization	C6_02370C		Ortholog(s) have structural constituent of ribosome activity and mitochondrial small ribosomal subunit localization	YGL129C	RSM23	mitochondrial 37S ribosomal protein RSM23	Positive regulator of the Gcn2p kinase activity; forms a complex with Gcn20p; proposed to stimulate Gcn2p activation by an uncharged tRNA
	CAGL0I05676g	1.13687593942068		Ortholog(s) have RNA-dependent ATPase activity, role in generation of catalytic spliceosome for first transesterification step, snoRNA splicing and U2-type catalytic step 1 spliceosome localization	C3_04230W		Ortholog(s) have RNA-dependent ATPase activity, role in generation of catalytic spliceosome for first transesterification step, snoRNA splicing and U2-type catalytic step 1 spliceosome localization	YNR011C	PRP2	DEAH-box RNA-dependent ATPase PRP2|RNA2	Mitochondrial aspartyl-tRNA synthetase; required for acylation of aspartyl-tRNA; yeast and bacterial aspartyl-, asparaginyl-, and lysyl-tRNA synthetases contain regions with high sequence similarity, suggesting a common ancestral gene
	CAGL0D01826g	1.13901947477661		Ortholog(s) have protein kinase regulator activity, role in regulation of translational elongation and cytosolic ribosome, extracellular region, mitochondrion localization	C2_10550C	GCN1	Ortholog(s) have protein kinase regulator activity, role in regulation of translational elongation and cytosolic ribosome, extracellular region, mitochondrion localization	YGL195W	GCN1	AAS103|NDR1	Ski complex component and WD-repeat protein; mediates 3'-5' RNA degradation by the cytoplasmic exosome; also required for meiotic double-strand break recombination; null mutants have superkiller phenotype
	CAGL0H05907g	1.13934565937172		Ortholog(s) have aspartate-tRNA ligase activity, role in mitochondrial aspartyl-tRNA aminoacylation and mitochondrion localization	C1_04030W		Ortholog(s) have aspartate-tRNA ligase activity, role in mitochondrial aspartyl-tRNA aminoacylation and mitochondrion localization	YPL104W	MSD1	aspartate--tRNA ligase MSD1|LPG5	Component of a heterodimeric Poc4p-Irc25p chaperone; involved in assembly of alpha subunits into the 20S proteasome; may regulate formation of proteasome isoforms with alternative subunits under different conditions; upregulates proteasome assembly in response to the unfolded protein response activated by mistargeting of proteins (UPRam)
	CAGL0I07073g	1.14313278345376		Ortholog(s) have role in nuclear-transcribed mRNA catabolic process, 3'-5' exonucleolytic nonsense-mediated decay, nuclear-transcribed mRNA catabolic process, non-stop decay and protein complex assembly, more	C6_03890C	SKI8	Ortholog(s) have role in nuclear-transcribed mRNA catabolic process, 3'-5' exonucleolytic nonsense-mediated decay, nuclear-transcribed mRNA catabolic process, non-stop decay and protein complex assembly, more	YGL213C	SKI8	SKI complex subunit WD repeat protein SKI8|REC103	Nucleolar protein; essential for processing and maturation of 27S pre-rRNA and large ribosomal subunit biogenesis; constituent of 66S pre-ribosomal particles; contains four RNA recognition motifs (RRMs)
	CAGL0D03278g	1.14922850398118		Ortholog(s) have role in chaperone-mediated protein complex assembly, nuclear-transcribed mRNA catabolic process, non-stop decay, proteasome assembly and intracellular localization	C1_12370W		Chaperone component; involved in assembly of alpha subunits into the 20S proteasome; flow model biofilm induced	YLR021W	IRC25	DMP2|PBA3|POC3	Mitochondrial methionyl-tRNA synthetase (MetRS); functions as a monomer in mitochondrial protein synthesis; functions similarly to cytoplasmic MetRS although the cytoplasmic form contains a zinc-binding domain not found in Msm1p
	CAGL0L12672g	1.16529139805546		Ortholog(s) have mRNA binding activity, role in cellular response to drug, maturation of LSU-rRNA from tricistronic rRNA transcript (SSU-rRNA, 5.8S rRNA, LSU-rRNA) and nucleolus, preribosome, large subunit precursor localization	C1_04390C	NOP4	Putative nucleolar protein; Hap43-induced; mutation confers hypersensitivity to 5-fluorocytosine (5-FC), 5-fluorouracil (5-FU), and tubercidin (7-deazaadenosine); represses in core stress response	YPL043W	NOP4	mRNA-binding ribosome biosynthesis protein NOP4|NOP77	Mitochondrial translation elongation factor Tu (EF-Tu); involved in fundamental pathway of mtDNA homeostasis; comprises both GTPase and guanine nucleotide exchange factor activities, while these activities are found in separate proteins in S. pombe and humans; rare mutations in human mitochondrial elongation factor Tu (EFTu) associated with severe lactic acidosis, rapidly progressive fatal enceph…
	CAGL0I08723g	1.17132503765291		Ortholog(s) have methionine-tRNA ligase activity, role in methionyl-tRNA aminoacylation and mitochondrion localization	C5_04650C	MSM1	Mitochondrial methionyl-tRNA synthetase (MetRS); functionally complements methionine auxotrophy of an E. coli MetRS mutant; transcript regulated by Nrg1; flow model biofilm induced	YGR171C	MSM1	methionine--tRNA ligase MSM1
	CAGL0G09581g	1.17385777409998		Ortholog(s) have GTPase activity, translation elongation factor activity, role in mitochondrial translational elongation and mitochondrion localization	C1_00590W	TUF1	Translation elongation factor TU; macrophage/pseudohyphal-induced; repressed upon phagocytosis by murine macrophage; levels decrease in stationary phase cells; Spider biofilm repressed	YOR187W	TUF1	translation elongation factor Tu|tufM	mRNA 5'-end-capping quality-control protein; has distributive, 5'-3' exoRNase activity; similar to Rai1p;
	CAGL0H08602g	1.17394848986136		Has domain(s) with predicted ATP binding, aminoacyl-tRNA ligase activity, magnesium ion binding, phenylalanine-tRNA ligase activity, tRNA binding activity and role in phenylalanyl-tRNA aminoacylation, tRNA aminoacylation, tRNA processing							2'-O-methyltransferase; responsible for modification of tRNA at position 4; C-terminal domain has similarity to Rossmann-fold (RFM) superfamily of RNA methyltransferases
	CAGL0A02860g	1.17771209476542		Ortholog(s) have 5'-3' exonuclease activity, role in deadenylation-dependent decapping of nuclear-transcribed mRNA and cytoplasm localization	CR_05160C		S. cerevisiae ortholog YDR370C/DXO1 has decapping and 5&#8242;-3&#8242; exoRNase activity; decreased transcription is observed upon fluphenazine treatment or in an azole-resistant strain that overexpresses CDR1 and CDR2	YDR370C	DXO1		Mitochondrial ribosomal protein of the large subunit; overproduction suppresses mutations in the COX2 leader peptide-encoding region
	CAGL0E01903g	1.18084544076599		Ortholog(s) have tRNA methyltransferase activity, role in tRNA methylation and cytosol, nucleolus localization	CR_00670C		Putative 2'-O-methyltransferase with a predicted role in tRNA modification; transcription is activated in the presence of elevated CO2	YOL125W	TRM13	tRNA:m4X modification enzyme	Protein required for mitochondrial ribosome small subunit biogenesis; null mutant is defective in respiration and in maturation of 15S rRNA; protein is localized to the mitochondrial inner membrane; null mutant interacts synthetically with prohibitin (Phb1p)
	CAGL0J09856g	1.18106311061739		Ortholog(s) have structural constituent of ribosome activity, role in mitochondrial translation and mitochondrial large ribosomal subunit localization	C5_01700W		Mitochondrial ribosomal protein of the large subunit; rat catheter biofilm induced	YBR122C	MRPL36	mitochondrial 54S ribosomal protein YmL36|YmL36	Mitochondrial leucyl-tRNA synthetase; also has direct role in splicing of several mitochondrial group I introns; indirectly required for mitochondrial genome maintenance; human homolog LARS2 can complement yeast null mutant, and is implicated in Perrault syndrome
	CAGL0L02893g	1.18117501372929		Ortholog(s) have role in maturation of SSU-rRNA and mitochondrial inner membrane localization	C3_07550C		Protein required for mitochondrial ribosome small subunit biogenesis; role in maturation of SSU-rRNA; Spider biofilm induced	YOR205C	GEP3	MTG3|AIM40|LRC5|FMP38	Component of the Sec13p-Sec31p complex of the COPII vesicle coat; COPII coat is required for vesicle formation in ER to Golgi transport; mutant has increased aneuploidy tolerance
	CAGL0H05049g	1.1880375909422		Ortholog(s) have leucine-tRNA ligase activity, mRNA binding activity, role in Group I intron splicing, leucyl-tRNA aminoacylation, mitochondrial translation and mitochondrion localization	C6_03450C	NAM2	Mitochondrial leucyl-tRNA synthetase	YLR382C	NAM2	leucine--tRNA ligase NAM2|LeuRS|MSL1	GTPase component of U5 snRNP involved in mRNA splicing via spliceosome; binds directly to U5 snRNA; proposed to be involved in conformational changes of the spliceosome; similarity to ribosomal translocation factor EF-2
	CAGL0J08998g	1.20837836893636		Ortholog(s) have structural molecule activity, role in COPII-coated vesicle budding, intracellular protein transport, nuclear envelope organization and COPII vesicle coat, cytosol, mating projection tip localization	C1_06930W	PGA63	Component COPII vesicle coat; required for vesicle formation in ER to Golgi transport; predicted GPI-anchor; flow model and Spider biofilm repressed	YDL195W	SEC31	WEB1	Protein with similarity to tRNA synthetases; non-tagged protein is detected in purified mitochondria; null mutant is viable and displays elevated frequency of mitochondrial genome loss
	CAGL0M08294g	1.21789496476412		Ortholog(s) have GTPase activity, U5 snRNA binding activity	C2_04640C	SNU114	Protein similar to S. cerevisiae Snu114p, which is an RNA helicase involved in pre-mRNA splicing; likely to be essential for growth, based on an insertional mutagenesis strategy	YKL173W	SNU114	U5 snRNP GTPase SNU114|GIN10	Essential nucleolar protein required for 40S ribosome biogenesis; associate with snR30; physically and functionally interacts with Krr1p
	CAGL0I05104g	1.23099634690231		Ortholog(s) have mitochondrion localization	CR_01480W	PRS	Putative prolyl-tRNA synthetase; monofunctional Class II synthetase; gene is constitutively expressed	YER087W	AIM10	putative proline--tRNA ligase AIM10	Component of cytosolic iron-sulfur protein assembly (CIA) machinery; acts at late step of Fe-S cluster assembly; forms CIA targeting complex with Cia2p and Met18p that directs Fe-S cluster incorporation into subset of proteins involved in methionine biosynthesis, DNA replication and repair, transcription, telomere maintenance; contains WD40 repeats; human homolog CIAO1 can complement yeast cia1 n…
	CAGL0M03905g	1.27213519814514		Ortholog(s) have role in endonucleolytic cleavage in ITS1 to separate SSU-rRNA from 5.8S rRNA and LSU-rRNA from tricistronic rRNA transcript (SSU-rRNA, 5.8S rRNA, LSU-rRNA) and 90S preribosome, nucleolus localization	C3_02350W		Ortholog(s) have role in endonucleolytic cleavage in ITS1 to separate SSU-rRNA from 5.8S rRNA and LSU-rRNA from tricistronic rRNA transcript (SSU-rRNA, 5.8S rRNA, LSU-rRNA)	YNL308C	KRI1		Subunit of the trimeric GatFAB AmidoTransferase(AdT) complex; involved in the formation of Q-tRNAQ; mutation is functionally complemented by the bacterial GatB ortholog
	CAGL0M08646g	1.29939735763479		Ortholog(s) have role in iron-sulfur cluster assembly, tRNA wobble uridine modification and cytosol, nucleus localization	C5_02730C		Ortholog(s) have role in iron-sulfur cluster assembly, tRNA wobble uridine modification and cytosol, nucleus localization	YDR267C	CIA1	iron-sulfur cluster assembly protein CIA1	NADH diphosphatase (pyrophosphatase); hydrolyzes the pyrophosphate linkage in NADH and related nucleotides; localizes to peroxisomes; nudix hydrolase family member
	CAGL0A04653g	1.30534776495407		Ortholog(s) have glutaminyl-tRNA synthase (glutamine-hydrolyzing) activity, role in glutaminyl-tRNAGln biosynthesis via transamidation, mitochondrial translation and glutamyl-tRNA(Gln) amidotransferase complex, mitochondrion localization	C1_05610W		Ortholog(s) have glutaminyl-tRNA synthase (glutamine-hydrolyzing) activity, role in glutaminyl-tRNAGln biosynthesis via transamidation, mitochondrial translation and glutamyl-tRNA(Gln) amidotransferase complex, mitochondrion localization	YBL080C	PET112	glutamyl-tRNA(Gln) amidotransferase subunit PET112	Mitochondrial ribosomal protein of the large subunit
	CAGL0M05687g	1.31902212650777		Ortholog(s) have NAD+ diphosphatase activity, role in NADH metabolic process and cytosol, nucleus, peroxisome localization	C6_02410W		Ortholog(s) have NAD+ diphosphatase activity, role in NADH metabolic process and cytosol, nucleus, peroxisome localization	YGL067W	NPY1	NAD(+) diphosphatase	Mitochondrial translational activator of the COB mRNA; membrane protein that interacts with translating ribosomes, acts on the COB mRNA 5'-untranslated leader
[truncated: 428 more rows]
