# Supplementary material for: From the first touch to biofilm establishment by the human pathogen Candida glabrata: a genome-wide to nanoscale view
Source: Commun Biol. 2021 Jul 20;4:886. doi: 10.1038/s42003-021-02412-7 (PMC8292413; doi:10.1038/s42003-021-02412-7)
Supplement: Supplementary file 6 — Supplementary Data 4 [file 42003_2021_2412_MOESM6_ESM.xlsx]

## Sheet: Wt_B-vs-tec1_B_results
	Candida glabrata				Candida albicans			Saccharomyces cerevisiae
Group	ID	log2FoldChange	Name	Definition	orth ID	orth name	orth Definition	orth ID	orth Name	orth Definition
Intracellular traficking	CAGL0K07337g	-2.95493811350275		Has domain(s) with predicted ion channel activity, role in ion transport and membrane localization
	CAGL0G04081g	-2.02275966061762		Ortholog(s) have Golgi apparatus, cell division site, cell periphery, cell tip, endoplasmic reticulum localization	C4_04230W		Putative transporter; fungal-specific; Spider biofilm induced	YLR004C	THI73	Putative plasma membrane permease; proposed to be involved in carboxylic acid uptake and repressed by thiamine; substrate of Dbf2p/Mob1p kinase; transcription is altered if mitochondrial dysfunction occurs
	CAGL0B01925g	-1.69827129184139		Ortholog(s) have protein serine/threonine kinase activity, role in exocytosis, protein autophosphorylation and cytoplasmic side of plasma membrane localization				YDR122W	KIN1	Serine/threonine protein kinase involved in regulation of exocytosis; localizes to the cytoplasmic face of the plasma membrane; KIN1 has a paralog, KIN2, that arose from the whole genome duplication
	CAGL0J04906g	-1.68088910133571		Ortholog(s) have cytoplasm localization	C4_05160C		Has domain(s) with predicted role in protein transport, vacuolar transport	YJL049W	YJL049W	Yeast homolog of human CHMP7, localizes to the endoplasmic reticulum presumably as part of an ESCRT-III like complex; null mutant has growth defect at 37 C in an apq12 deletion background; non-essential gene
	CAGL0H06809g	-1.41041664322563		Putative component of Golgi-associated retrograde protein complex; gene is upregulated in azole-resistant strain
	CAGL0D01232g	-1.27369666209337		Ortholog(s) have signal sequence binding activity, role in vacuolar transport and Golgi apparatus, late endosome localization	C1_04840C		Ortholog(s) have signal sequence binding activity, role in vacuolar transport and late endosome localization	YPR079W	MRL1	Membrane protein; has similarity to mammalian mannose-6-phosphate receptors; possibly functions as a sorting receptor in the delivery of vacuolar hydrolases; protein abundance increases in response to DNA replication stress
	CAGL0M10235g	-1.23602613745146		Ortholog(s) have SNAP receptor activity, role in intra-Golgi vesicle-mediated transport, vesicle fusion and Golgi trans cisterna, SNARE complex localization	CR_01190C	SFT1	Putative Golgi v-SNARE; Plc1-regulated; Spider biofilm induced	YKL006C-A	SFT1	Intra-Golgi v-SNARE; required for transport of proteins between an early and a later Golgi compartment
	CAGL0C01771g	-1.21333533213589		Ortholog(s) have fungal-type vacuole membrane localization	CR_03040C	HGT18	Putative glucose transporter of the major facilitator superfamily; the C. albicans glucose transporter family comprises 20 members; 12 probable membrane-spanning segments; expressed in rich medium with 2% glucose	YBR241C	YBR241C	Putative transporter, member of the sugar porter family; green fluorescent protein (GFP)-fusion protein localizes to the vacuolar membrane; YBR241C is not an essential gene; YBR241C has a paralog, VPS73, that arose from the whole genome duplication
	CAGL0I07381g	-1.19189431045182		Ortholog(s) have COPI-coated vesicle, Golgi apparatus localization	C1_02410C		Ortholog(s) have COPI-coated vesicle, Golgi apparatus localization	YOL107W	YOL107W	Putative protein of unknown function; green fluorescent protein (GFP)-fusion protein localizes to the cytoplasm and colocalizes in a punctate pattern with the early golgi/COPI vesicles; YOL107W is not an essential protein
	CAGL0D03938g	-1.09894491445834		Ortholog(s) have GTPase activator activity and cytosol localization	C7_01660C		Ortholog(s) have GTPase activator activity and cytosol localization	YHR035W	NEL1	Activator of Sar1p GTPase activity; paralog of Sec23 but does not associate with the COPII components; not an essential gene
	CAGL0K09988g	-1.07893446840445		Ortholog(s) have role in vesicle-mediated transport and endoplasmic reticulum, integral component of Golgi membrane localization	C1_09950C		Putative integral membrane protein; S. cerevisiae ortholog Tvp23 localizes to late Golgi vesicles; rat catheter biofilm induced	YDR084C	TVP23	Integral membrane protein; localized to late Golgi vesicles along with the v-SNARE Tlg2p; green fluorescent protein (GFP)-fusion protein localizes to the cytoplasm in a punctate pattern
	CAGL0D01672g	-1.06032420010785		Ortholog(s) have role in Golgi inheritance, Golgi to plasma membrane transport, endoplasmic reticulum inheritance, exocytosis	C6_00780W	SEC8	Predicted subunit of the exocyst complex, involved in exocytosis; localizes to a crescent on the surface of the hyphal tip	YPR055W	SEC8	Essential 121 kDa subunit of the exocyst complex; the exocyst mediates polarized targeting and tethering of post-Golgi secretory vesicles to active sites of exocytosis at the plasma membrane prior to SNARE-mediated fusion; involved in ER and Golgi inheritance in small buds; relocalizes away from bud neck upon DNA replication stress
	CAGL0L02519g	-1.0457855491196		Has domain(s) with predicted role in transmembrane transport and integral component of membrane localization
	CAGL0M10417g	-1.02522516112725		Ortholog(s) have role in vesicle-mediated transport and fungal-type vacuole membrane, vesicle localization				YDR003W	RCR2	Vacuolar protein; presumably functions within the endosomal-vacuolar trafficking pathway, affecting events that determine whether plasma membrane proteins are degraded or routed to the plasma membrane; RCR2 has a paralog, RCR1, that arose from the whole genome duplication
	CAGL0H04961g	-1.0089068931777		Ortholog(s) have P-P-bond-hydrolysis-driven protein transmembrane transporter activity, peptide transporter activity, signal sequence binding activity	C3_07810C	SEC61	ER protein-translocation complex subunit; essential; 10 predicted transmembrane regions; chimeric mutant partially functionally complements S. cerevisiae sec61 defects; Spider biofilm repressed	YLR378C	SEC61	Conserved ER protein translocation channel; essential subunit of Sec61 complex (Sec61p, Sbh1p, and Sss1p); forms channel for SRP-dependent protein import; with Sec63 complex allows SRP-independent protein import into ER; involved in posttranslational soluble protein import into the ER, ERAD of soluble substrates, and misfolded soluble protein export from the ER
	CAGL0J08712g	1.03739599627433		Ortholog(s) have nicotinamide riboside transmembrane transporter activity, nucleobase transmembrane transporter activity and role in nicotinamide riboside transport, nucleobase transport, transmembrane transport	C4_00680W		Ortholog(s) have nicotinamide riboside transmembrane transporter activity, nucleobase transmembrane transporter activity and role in nicotinamide riboside transport, nucleobase transport, transmembrane transport	YAL022C	FUN26	High affinity, broad selectivity, nucleoside/nucleobase transporter; vacuolar membrane localized transporter which may regulate the balance of nicotinamide riboside (NmR) levels between the cytosol and vacuole, contributing to salvage of NmR for use in cytosolic NAD+ synthesis; equilibrative nucleoside transporter (ENT) family member
	CAGL0D00924g	1.04795528875987		Ortholog(s) have role in ER to Golgi vesicle-mediated transport, Golgi vesicle docking, SNARE complex assembly and ER to Golgi transport vesicle membrane, Golgi membrane localization	C4_05280W	USO1	Ortholog(s) have role in ER to Golgi vesicle-mediated transport, Golgi vesicle docking, SNARE complex assembly and ER to Golgi transport vesicle membrane, Golgi membrane localization	YDL058W	USO1	Essential protein involved in vesicle-mediated ER to Golgi transport; binds membranes and functions during vesicle docking to the Golgi; required for assembly of the ER-to-Golgi SNARE complex
	CAGL0E05896g	1.05550843251879		Ortholog(s) have GTP binding, GTPase activity	C6_02220W	SAR1	Functional homolog of S. cerevisiae Sar1; which is required for ER-to-Golgi protein transport; binds GTP; similar to small GTPase superfamily proteins; gene has intron; Hap43-induced; rat catheter biofilm repressed	YPL218W	SAR1	ARF family GTPase; component of the COPII vesicle coat; required for transport vesicle formation during ER to Golgi protein transport; lowers membrane rigidity aiding vesicle formation; localizes to ER-mitochondrial contact sites where it enhances membrane curvature, thereby reducing contact size via its N-terminal amphipathic helix; regulates mitochondrial fission and fusion dynamics
	CAGL0M00418g	1.10009683431622		Ortholog(s) have protein transporter activity, role in protein import into mitochondrial inner membrane and cytosol, mitochondrial intermembrane space protein transporter complex localization	C3_07890W	TIM8	Predicted mitochondrial intermembrane space protein with role in protein import into mitochondrial inner membrane and cytosol	YJR135W-A	TIM8	Mitochondrial intermembrane space protein; forms a complex with Tim13p that delivers a subset of hydrophobic proteins to the TIM22 complex for inner membrane insertion; homolog of human TIMM8A, implicated in Mohr-Tranebjaerg syndrome, also known as deafness-dystonia-optic neuronopathy (DDON) syndrome; human TIMM8A can complement yeast null mutant
	CAGL0I09108g	1.14580054314484		Has domain(s) with predicted role in transmembrane transport and integral component of membrane localization
	CAGL0J01067g	1.15639255350581		Ortholog(s) have Rab geranylgeranyltransferase activity and role in ER to Golgi vesicle-mediated transport, protein geranylgeranylation, protein targeting to membrane	C1_04070C	BET4	Ortholog(s) have Rab geranylgeranyltransferase activity and role in ER to Golgi vesicle-mediated transport, protein geranylgeranylation, protein targeting to membrane	YJL031C	BET4	Alpha subunit of Type II geranylgeranyltransferase; required for vesicular transport between the endoplasmic reticulum and the Golgi; provides a membrane attachment moiety to Rab-like proteins Ypt1p and Sec4p
	CAGL0L12826g	1.15890545142473		Ortholog(s) have GTPase activity and role in Golgi to plasma membrane protein transport, protein targeting to Golgi, response to endoplasmic reticulum stress	C1_11190W	ARL3	Putative Ras superfamily GTPase; induced by nitric oxide independent of Yhb1p	YPL051W	ARL3	ARF-like small GTPase of the RAS superfamily; required for recruitment of Arl1p, a GTPase that regulates membrane traffic, to the Golgi apparatus; NatC-catalyzed N-terminal acetylation regulates Golgi membrane association mediated by interaction with membrane receptor, Sys1p; similar to ADP-ribosylation factor and orthologous to mammalian ARFRP1
	CAGL0M11946g	1.2121814467527		Ortholog(s) have role in ER to Golgi vesicle-mediated transport and ER to Golgi transport vesicle, integral component of Golgi membrane, integral component of endoplasmic reticulum membrane localization	C5_00830C	ERV46	Putative ER-derived vesicle protein; COPII-coated vesicle complex subunit; transcript induced by filamentous growth; Spider biofilm repressed	YAL042W	ERV46	Protein localized to COPII-coated vesicles; forms a complex with Erv41p; involved in the membrane fusion stage of transport
	CAGL0J09790g	1.23451967106713		Ortholog(s) have guanine nucleotide transmembrane transporter activity and role in cellular iron ion homeostasis, guanine nucleotide transport, mitochondrial genome maintenance, transmembrane transport	C6_01930W	YHM1	Putative mitochondrial carrier protein; fungal-specific (no human or murine homolog); Hap43p-repressed gene	YDL198C	GGC1	Mitochondrial GTP/GDP transporter; essential for mitochondrial genome maintenance; has a role in mitochondrial iron transport; member of the mitochondrial carrier family
	CAGL0I04268g	1.30091472706678		Ortholog(s) have Rab GTPase binding activity and Golgi apparatus localization	C1_12920C		Ortholog(s) have Rab GTPase binding activity and Golgi apparatus, endoplasmic reticulum localization	YGL161C	YIP5	Protein that interacts with Rab GTPases; localized to late Golgi vesicles; computational analysis of large-scale protein-protein interaction data suggests a possible role in vesicle-mediated transport
	CAGL0A00627g	1.44218146268437		Ortholog(s) have role in ER to Golgi vesicle-mediated transport and endoplasmic reticulum, mitochondrion localization				YGL002W	ERP6	Member of the p24 family involved in ER to Golgi transport; similar to Emp24p and Erv25p; the authentic, non-tagged protein is detected in highly purified mitochondria in high-throughput studies; ERP6 has a paralog, ERP1, that arose from the whole genome duplication
	CAGL0L07282g	1.46235319057567		Ortholog(s) have role in ER to Golgi vesicle-mediated transport, protein secretion and cis-Golgi network, cytoplasm localization	C2_02260W		Putative cis-golgi localized protein involved in ER to Golgi transport; Spider biofilm repressed	YDL099W	BUG1	Cis-golgi localized protein involved in ER to Golgi transport; forms a complex with the mammalian GRASP65 homolog, Grh1p; mutants are compromised for the fusion of ER-derived vesicles with Golgi membranes
	CAGL0E05258g	1.53461577447784		Ortholog(s) have SNAP receptor activity and role in Golgi to plasma membrane transport, endocytosis, exocytosis, vesicle fusion	C1_13690C		Ortholog(s) have SNAP receptor activity and role in Golgi to plasma membrane transport, endocytosis, exocytosis, vesicle fusion	YOR327C	SNC2	Vesicle membrane receptor protein (v-SNARE); involved in the fusion between Golgi-derived secretory vesicles with the plasma membrane; Snc2p levels regulated by Vps45p; member of the synaptobrevin/VAMP family of R-type v-SNARE proteins; SNC2 has a paralog, SNC1, that arose from the whole genome duplication
	CAGL0G01452g	1.54249877261797		Ortholog(s) have role in ER to Golgi vesicle-mediated transport and ER to Golgi transport vesicle, Golgi apparatus, endoplasmic reticulum localization	C1_06480C		Ortholog(s) have role in ER to Golgi vesicle-mediated transport and ER to Golgi transport vesicle, Golgi apparatus, endoplasmic reticulum localization	YNL044W	YIP3	Protein localized to COPII vesicles; proposed to be involved in ER to Golgi transport; interacts with members of the Rab GTPase family and Yip1p; also interacts with Rtn1p
	CAGL0K12716g	1.56219060079648		Ortholog(s) have fungal-type vacuole, prospore membrane localization				YFL040W	YFL040W	Putative transporter; member of the sugar porter family; YFL040W is not an essential gene; may have a role in intracellular sterol transport
	CAGL0J05104g	1.57478094030606		Ortholog(s) have role in actin cortical patch localization, arginine transport, endocytosis, late endosome to vacuole transport, lysine transport, regulation of intracellular pH	C1_05120W		Ortholog(s) have role in actin cortical patch localization, arginine transport, endocytosis, late endosome to vacuole transport, lysine transport, regulation of intracellular pH	YJL059W	YHC3	Protein required for the ATP-dependent transport of arginine; vacuolar membrane protein; involved in the ATP-dependent transport of arginine into the vacuole and possibly in balancing ion homeostasis; human homolog CLN3 involved in Batten disease (juvenile onset neuronal ceroid lipofuscinosis) can complement yeast null mutant
	CAGL0D02662g	1.59530680419037		Has domain(s) with predicted substrate-specific transmembrane transporter activity, transmembrane transporter activity, role in transmembrane transport and integral component of membrane, membrane localization
	CAGL0C02761g	1.61177609814563		Ortholog(s) have role in ER to Golgi vesicle-mediated transport, protein retention in ER lumen and ER to Golgi transport vesicle, Golgi apparatus, endoplasmic reticulum localization				YAL007C	ERP2	Member of the p24 family involved in ER to Golgi transport; similar to Emp24p and Erv25p; role in misfolded protein quality control; forms a heterotrimeric complex with Erp1p, Emp24p, and Erv25p; localized to COPII-coated vesicles; ERP2 has a paralog, ERP4, that arose from the whole genome duplication
	CAGL0K01793g	1.70094333224686		Ortholog(s) have endoplasmic reticulum localization	C2_05290C		Ortholog(s) have Golgi apparatus, endoplasmic reticulum localization	YDL018C	ERP3	Protein with similarity to Emp24p and Erv25p; member of the p24 family involved in ER to Golgi transport
	CAGL0M12903g	1.72107870998354	SEC28	Putative epsilon-COP coatomer subunit	C5_00080C		Epsilon-COP subunit of the coatomer; regulates retrograde Golgi-to-ER protein traffic; Spider biofilm repressed	YIL076W	SEC28	Epsilon-COP subunit of the coatomer; regulates retrograde Golgi-to-ER protein traffic; stabilizes Cop1p, the alpha-COP and the coatomer complex; non-essential for cell growth; protein abundance increases in response to DNA replication stress
	CAGL0E03872g	1.729098074486		Ortholog(s) have SNAP receptor activity, role in Golgi vesicle transport, vesicle fusion and Golgi medial cisterna, SNARE complex localization	C7_01740C		Ortholog(s) have SNAP receptor activity, role in Golgi vesicle transport, vesicle fusion and Golgi medial cisterna, SNARE complex localization	YHL031C	GOS1	v-SNARE protein involved in Golgi transport; homolog of the mammalian protein GOS-28/GS28
	CAGL0D02640g	1.81030764886131		Has domain(s) with predicted substrate-specific transmembrane transporter activity, transmembrane transporter activity, role in transmembrane transport and integral component of membrane, membrane localization
	CAGL0F00209g	1.96478401330274		Has domain(s) with predicted role in transmembrane transport and integral component of membrane localization
	CAGL0I01232g	2.05553611162409		Ortholog(s) have endoplasmic reticulum localization	C1_10940C	ERP5	Protein involved in ER to Golgi transport; rat catheter and Spider biofilm repressed	YHR110W	ERP5	Protein with similarity to Emp24p and Erv25p; member of the p24 family involved in ER to Golgi transport
	CAGL0H02255g	2.3173361478758		Ortholog(s) have role in Golgi to plasma membrane transport and cell periphery, endoplasmic reticulum, fungal-type vacuole membrane localization	C1_09430W		Putative membrane protein; induced by alpha pheromone in SpiderM medium; Hap4-induced gene; Spider biofilm induced	YMR266W	RSN1	Membrane protein of unknown function; overexpression suppresses NaCl sensitivity of sro7 mutant cells by restoring sodium pump (Ena1p) localization to the plasma membrane
	CAGL0I00286g	2.71999689051568		Has domain(s) with predicted substrate-specific transmembrane transporter activity, transmembrane transporter activity, role in transmembrane transport and integral component of membrane, membrane localization
Endocytosis	CAGL0L08932g	-1.75178580977155	LSP1	Long chain base-responsive inhibitor of protein kinases; protein abundance decreased in ace2 mutant cells	C1_04680W	PIL1	Eisosome component; predicted role in endocytosis; echinocandin-binding protein; localizes to cell surface of hyphae, but not yeast-form cells; Hap43, YNB biofilm induced; rat catheter biofilm repressed	YPL004C	LSP1	Eisosome core component; eisosomes are large immobile patch structures at the cell cortex associated with endocytosis; phosphorylated on Thr233 upon Pkc1p hyperactivation in a Slt2p MAPK-dependent fashion; null mutants show activation of Pkc1p/Ypk1p stress resistance pathways; member of the BAR domain family
	CAGL0L07128g	-1.52330773409212		Ortholog(s) have clathrin binding activity, role in clathrin-dependent endocytosis, histone H2B ubiquitination, protein processing and Dsc E3 ubiquitin ligase complex, clathrin-coated vesicle, endoplasmic reticulum localization	C4_03920W		Ortholog(s) have clathrin binding activity, role in clathrin-dependent endocytosis, histone H2B ubiquitination, protein processing and Dsc E3 ubiquitin ligase complex, clathrin-coated vesicle, endoplasmic reticulum localization	YDL091C	UBX3	Clathrin-coated vesicle component, regulator of endocytosis; copurifies with the DSC ubiquitin ligase complex; UBX (ubiquitin regulatory X) domain-containing protein that interacts with Cdc48p; required for efficient clathrin-mediated endocytosis; ortholog of fission yeast Ucp10
	CAGL0C02959g	-1.19033606183077		Ortholog(s) have proton-transporting ATPase activity, rotational mechanism activity and role in endocytosis, polyphosphate metabolic process, protein complex assembly, proton transport, vacuolar acidification, vacuole organization	C4_05240C	VPH1	Vacuolar H(+)-ATPase; transcription regulated by Nrg1, Mig1, and Tup1	YOR270C	VPH1	Subunit a of vacuolar-ATPase V0 domain; one of two isoforms (Vph1p and Stv1p); Vph1p is located in V-ATPase complexes of the vacuole while Stv1p is located in V-ATPase complexes of the Golgi and endosomes; relative distribution to the vacuolar membrane decreases upon DNA replication stress; human homolog ATP6V0A4 implicated in renal tubular acidosis, can complement yeast null mutant
	CAGL0M03135g	-1.16818335629013		Ortholog(s) have protein binding, bridging, ubiquitin protein ligase binding activity and role in positive regulation of ubiquitin-dependent endocytosis, regulation of intracellular transport	C6_03180C		Ortholog(s) have protein binding, bridging, ubiquitin protein ligase binding activity and role in positive regulation of ubiquitin-dependent endocytosis, regulation of intracellular transport	YJL084C	ALY2	Alpha arrestin; controls nutrient-mediated intracellular sorting of permease Gap1p; interacts with AP-1 subunit Apl4p; phosphorylated by Npr1p and also by cyclin-CDK complex Pcl7p-Pho85p; promotes endocytosis of plasma membrane proteins; ALY2 has a paralog, ALY1, that arose from the whole genome duplication
	CAGL0L07788g	-1.15496737933599		Ortholog(s) have cytoskeletal protein binding, lipid binding activity	C7_00020C	RVS161	Protein required for endocytosis; contains a BAR domain, which is found in proteins involved in membrane curvature; null mutant exhibits defects in hyphal growth, virulence, cell wall integrity, and actin patch localization	YCR009C	RVS161	Amphiphysin-like lipid raft protein; N-BAR domain protein that interacts with Rvs167p and regulates polarization of the actin cytoskeleton, endocytosis, cell polarity, cell fusion and viability following starvation or osmotic stress
	CAGL0E02607g	-1.05250613564821		Ortholog(s) have role in endosome organization, positive regulation of vacuole fusion, non-autophagic, regulation of endocytosis, vacuolar acidification, vacuole fusion, non-autophagic and cytosol, vacuolar membrane localization
	CAGL0L02299g	1.18059938578009	VPS1	Ortholog(s) have GTPase activity	C5_01210W	VPS1	Dynamin-family GTPase-related protein; induced upon adherence to polystyrene; regulated by Gcn2p and Gcn4p	YKR001C	VPS1	Dynamin-like GTPase required for vacuolar sorting; also involved in actin cytoskeleton organization, endocytosis, late Golgi-retention of some proteins, regulation of peroxisome biogenesis
	CAGL0C05203g	1.25627232390006		Ortholog(s) have AP-2 adaptor complex, cytosol localization	C2_07880W	APM4	Cargo-binding subunit of the clathrin associated protein complex (AP-2), involved in endocytosis	YOL062C	APM4	Cargo-binding mu subunit of AP-2; AP-2 is a heterotetrameric endocytic cargo-binding adaptor that facilitates uptake of membrane proteins during clathrin-mediated endocytosis; Apm4p is required for AP-2 function and localization, and binds cell wall stress receptor Mid2p; AP-2 is required for cell polarity responses to pheromone, nutritional status and cell wall damage in S. cerevisiae, and for h…
	CAGL0I08833g	1.30030209803239		Ortholog(s) have role in clathrin-dependent endocytosis, exocytosis, positive regulation of endocytosis, protein trimerization and endosome, trans-Golgi network localization	C4_01980C	CLC1	Clathrin light chain; subunit of the major coat protein involved in intracellular protein transport and endocytosis; rat cathetr and Spider biofilm repressed	YGR167W	CLC1	Clathrin light chain; subunit of the major coat protein involved in intracellular protein transport and endocytosis; regulates endocytic progression; thought to regulate clathrin function; the clathrin triskelion is a trimeric molecule composed of three heavy chains that radiate from a vertex and three light chains which bind noncovalently near the vertex of the triskelion
	CAGL0L02409g	1.32528146860337		Ortholog(s) have role in endosome organization, regulation of protein localization and BLOC-1 complex localization				YEL005C	VAB2	Subunit of the BLOC-1 complex involved in endosomal maturation; interacts with Vps21p-GFP; has potential role in vacuolar function, as suggested by its ability to bind Vac8p; likely member of; Vab2p-GFP-fusion localizes to cytoplasm in punctate pattern
	CAGL0H03355g	1.69722526819362		Ortholog(s) have role in endosome organization, regulation of protein localization and BLOC-1 complex, endosome localization	C3_02580C		Ortholog(s) have role in endosome organization, regulation of protein localization and BLOC-1 complex, endosome localization	YGL079W	KXD1	Subunit of the BLOC-1 complex involved in endosomal maturation; null mutant is sensitive to drug inducing secretion of vacuolar cargo; GFP-fusion protein localizes to the endosome
	CAGL0L00561g	1.92345158650577		Ortholog(s) have SNAP receptor activity, phosphatidic acid binding, phosphatidylinositol-3,4-bisphosphate binding, phosphatidylinositol-3,5-bisphosphate binding, phosphatidylinositol-4,5-bisphosphate binding activity				YPL232W	SSO1	Plasma membrane t-SNARE; involved in fusion of secretory vesicles at the plasma membrane and in vesicle fusion during sporulation; forms a complex with Sec9p that binds v-SNARE Snc2p; syntaxin homolog; functionally redundant with Sso2p; SSO1 has a paralog, SSO2, that arose from the whole genome duplication
Organelle organization	CAGL0G03773g	-1.81690819899746		Ortholog(s) have structural constituent of nuclear pore activity	C1_04200C		Ortholog(s) have structural constituent of nuclear pore activity	YLL023C	POM33	Transmembrane nucleoporin; involved in nuclear pore complex (NPC) distribution, assembly or stabilization; highly conserved across species, orthologous to human TMEM33 and paralogous to Per33p; protein abundance increases in response to DNA replication stress
	CAGL0C00693g	-1.80961580031992	CCC1	Putative vacuolar iron transporter	C3_03710W	CCC1	Manganese transporter; required for normal filamentous growth; mRNA binds She3, localized to hyphal tips; repressed by NO, alkaline pH; colony morphology-related regulation by Ssn6; regulated by Sef1, Sfu1, Hap43; Spider biofilm induced	YLR220W	CCC1	Vacuolar Fe2+/Mn2+ transporter; suppresses respiratory deficit of yfh1 mutants, which lack the ortholog of mammalian frataxin, by preventing mitochondrial iron accumulation; relative distribution to the vacuole decreases upon DNA replication stress
	CAGL0G06006g	-1.80533709802095		Ortholog(s) have endopeptidase inhibitor activity and role in vacuole fusion, non-autophagic	C4_02340W		Putative protease B inhibitor; hyphal-induced expression; Cyr1p- and Ras1p-repressed	YHR138C	YHR138C	Protein of unknown function; similar to Pbi2p; double null mutant lacking Pbi2p and Yhr138cp exhibits highly fragmented vacuoles; protein abundance increases in response to DNA replication stress
	CAGL0J08591g	-1.59258667120368		Ortholog(s) have lipid binding activity, role in endoplasmic reticulum membrane organization, regulation of phosphatidylinositol dephosphorylation and cortical endoplasmic reticulum, mitochondrion, plasma membrane localization	C1_10680C		Predicted lipid-binding ER protein; involved in ER-plasma membrane tethering; Spider biofilm induced	YOR086C	TCB1	Lipid-binding ER protein involved in ER-plasma membrane tethering; one of 6 proteins (Ist2p, Scs2p, Scs22p, Tcb1p, Tcb2p, Tcb3p) that connect ER to plasma membrane and regulate PI4P levels by controlling access of Sac1p phosphatase to its substrate PI4P in PM; contains 3 calcium and lipid binding domains; non-tagged protein also localizes to mitochondria; C-termini of Tcb1p, Tcb2p and Tcb3p inter…
	CAGL0M01936g	-1.56439230316352		Ortholog(s) have cytosol, fungal-type vacuole membrane localization	C2_10870W		Ortholog(s) have fungal-type vacuole membrane localization	YBR074W	PFF1	Multi-spanning vacuolar membrane protease; glycosylated transmembrane protein bearing homology to the M28 family of metalloproteases; has a lumenal-facing protease domain; proposed role in vacuole physiology
	CAGL0F03267g	-1.5356422756168		Ortholog(s) have sterol binding activity and cortical endoplasmic reticulum, mitochondrion, ribosome localization				YHR080C	YHR080C	Sterol-binding protein that localizes to puncta in the cortical ER; sterol binding occurs via two StART-like domains; one of six StART-like domain-containing proteins in yeast that may be involved in intracellular sterol transfer between membranes; conserved across eukaryotes; has both GRAM and StART-like (VASt) domains; the authentic, non-tagged protein is detected in highly purified mitochondri…
	CAGL0I02134g	-1.45335357521564	PEX21B	Ortholog(s) have role in protein import into peroxisome matrix and cytosol, peroxisome localization				YHR160C	PEX18	Peroxin; required for targeting of peroxisomal matrix proteins containing PTS2; interacts with Pex7p; partially redundant with Pex21p; primarily responsible for peroxisomal import during growth on oleate, and expression is induced during oleate growth
	CAGL0L11440g	-1.44457764600458		Ortholog(s) have lipid binding activity and role in endoplasmic reticulum membrane organization, regulation of phosphatidylinositol dephosphorylation	C1_03100W		Putative lipid-binding protein with a predicted role in calcium-dependent phospholipid-binding	YML072C	TCB3	Cortical ER protein involved in ER-plasma membrane tethering; one of 6 proteins (Ist2p, Scs2p, Scs22p, Tcb1p, Tcb2p, Tcb3p) that connect ER to the plasma membrane (PM) and regulate PM phosphatidylinositol-4-phosphate (PI4P) levels by controlling access of Sac1p phosphatase to its substrate PI4P in the PM; localized to the bud via specific mRNA transport; non-tagged protein detected in a phosphory…
	CAGL0I07007g	-1.42724762918333		Ortholog(s) have role in mitochondrion organization, mitochondrion-ER tethering, phospholipid transport and ERMES complex localization	C1_06230C	MDM34	Putative zinc finger transcription factor; macrophage-downregulated; flow model biofilm induced; flow model and Spider biofilm induced	YGL219C	MDM34	Mitochondrial component of the ERMES complex; links the ER to mitochondria and may promote inter-organellar calcium and phospholipid exchange as well as coordinating mitochondrial DNA replication and growth; required for mitophagy; ERMES complex is often co-localized with peroxisomes and with concentrated areas of pyruvate dehydrogenase
	CAGL0H04543g	-1.40619612681744		Ortholog(s) have role in endoplasmic reticulum membrane organization, phospholipid biosynthetic process, regulation of phosphatidylinositol dephosphorylation and cytosol localization				YBL091C-A	SCS22	Protein involved in regulation of phospholipid metabolism; one of 6 proteins (Ist2p, Scs2p, Scs22p, Tcb1p, Tcb2p, Tcb3p) that connect the ER and plasma membrane (PM); regulates PM PI4P levels by controlling access of the Sac1p phosphatase to its substrate, PI4P; human VAP homolog; similar to D. melanogaster inturned protein; SWAT-GFP and mCherry fusion proteins localize to the cytosol; SCS22 has …
	CAGL0F05599g	-1.24521521339858		Ortholog(s) have nucleocytoplasmic transporter activity, structural constituent of nuclear pore activity	C3_04700W		Ortholog(s) have nucleocytoplasmic transporter activity, structural constituent of nuclear pore activity	YDR192C	NUP42	FG-nucleoporin component of central core of the nuclear pore complex; also part of the nuclear pore complex (NPC) cytoplasmic filaments; contributes directly to nucleocytoplasmic transport and maintenance of the NPC permeability barrier and is involved in gene tethering at the nuclear periphery; interacts with Gle1p
	CAGL0I01870g	-1.07716060432175	PEX24	Ortholog(s) have role in peroxisome organization and cytosol, peroxisomal membrane localization	C3_04800C		Ortholog(s) have role in peroxisome organization and cytosol, peroxisomal membrane localization	YHR150W	PEX28	Peroxisomal integral membrane peroxin; involved in the regulation of peroxisomal size, number and distribution; genetic interactions suggest that Pex28p and Pex29p act at steps upstream of those mediated by Pex30p, Pex31p, and Pex32p
	CAGL0G07881g	1.0031425978677		Ortholog(s) have role in vacuolar proton-transporting V-type ATPase complex assembly and endoplasmic reticulum membrane localization	C2_09290W		Ortholog(s) have role in vacuolar proton-transporting V-type ATPase complex assembly and endoplasmic reticulum membrane localization	YGR105W	VMA21	Integral membrane protein required for V-ATPase function; not an actual component of the vacuolar H+-ATPase (V-ATPase) complex; diverged ortholog of human XMEA (X-linked Myopathy with Excessive Autophagy); functions in the assembly of the V-ATPase; localized to the yeast endoplasmic reticulum (ER)
	CAGL0J09152g	1.00648573956881		Ortholog(s) have Rho GDP-dissociation inhibitor activity	C3_05000W	RDI1	Putative rho GDP dissociation inhibitor; transposon mutation affects filamentous growth; farnesol, filament-induced; regulated by Nrg1, Tup1; protein levels low in stationary phase yeast	YDL135C	RDI1	Rho GDP dissociation inhibitor; involved in the localization and regulation of Cdc42p and Rho1p; protein abundance increases in response to DNA replication stress
	CAGL0F06347g	1.01109673534284	STV1	Ortholog(s) have proton-transporting ATPase activity, rotational mechanism activity, role in vacuolar acidification and Golgi apparatus, late endosome, vacuolar proton-transporting V-type ATPase, V0 domain localization				YMR054W	STV1	Subunit a of the vacuolar-ATPase V0 domain; one of two isoforms (Stv1p and Vph1p); Stv1p is located in V-ATPase complexes of the Golgi and endosomes while Vph1p is located in V-ATPase complexes of the vacuole
	CAGL0K01221g	1.01844040136442	PEX8	Ortholog(s) have protein binding, bridging activity, role in protein import into peroxisome matrix and extrinsic component of intraperoxisomal membrane, peroxisomal importomer complex localization				YGR077C	PEX8	Intraperoxisomal organizer of the peroxisomal import machinery; organizes the formation of the importomer complex, bridging the docking complex with the RING finger complex; tightly associated with the lumenal face of the peroxisomal membrane; essential for peroxisome biogenesis; binds PTS1-signal receptor Pex5p, and PTS2-signal receptor Pex7p
	CAGL0I09812g	1.0342289264555		Ortholog(s) have diacylglycerol kinase activity, role in phosphatidic acid biosynthetic process and integral component of endoplasmic reticulum membrane localization	C2_00790C		Ortholog(s) have diacylglycerol kinase activity, role in phosphatidic acid biosynthetic process and integral component of endoplasmic reticulum membrane localization	YOR311C	DGK1	Diacylglycerol kinase; localized to the endoplasmic reticulum (ER); overproduction induces enlargement of ER-like membrane structures and suppresses a temperature-sensitive sly1 mutation; contains a CTP transferase domain
	CAGL0G06424g	1.07398899221399		Ortholog(s) have phosphatidylinositol-3-phosphate binding activity, role in late endosome to Golgi transport, protein localization and cytosol, endosome, fungal-type vacuole membrane, nucleus localization	C1_08340C		Sorting nexin; role in maintaining late-Golgi resident enzymes in their proper location by recycling molecules from the prevacuolar compartment; Spider biofilm induced	YOR357C	SNX3	Sorting nexin for late-Golgi enzymes; required to maintain late-Golgi resident enzymes in their proper location by recycling molecules from the prevacuolar compartment; contains a PX domain and sequence similarity to human Snx3p
	CAGL0L04444g	1.11279584528696		Ortholog(s) have role in posttranslational protein targeting to membrane, protein insertion into ER membrane and TRC complex, nucleus localization	C5_02210W		Protein with a role in insertion of tail-anchored proteins into the ER membrane; Spider biofilm repressed	YOR164C	GET4	Protein involved in inserting tail-anchored proteins into ER membranes; forms a complex with Mdy2p; highly conserved across species and homologous to human gene C7orf20
	CAGL0J03564g	1.13036513872186		Ortholog(s) have GTPase activator activity, role in positive regulation of GTPase activity, regulation of COPII vesicle coating and integral component of endoplasmic reticulum membrane localization	C6_01760W	SEC12	Putative guanyl-nucleotide exchange factor; induced in high iron; Hap43-repressed	YCR067C	SED4	Integral ER membrane protein that stimulates Sar1p GTPase activity; involved in COPII vesicle budding through disassociation of coat proteins from membranes onto liposomes; binds Sec16p; SED4 has a paralog, SEC12, that arose from the whole genome duplication
	CAGL0B02585g	1.17191120860777		Ortholog(s) have role in ER-dependent peroxisome organization, endoplasmic reticulum inheritance, endoplasmic reticulum tubular network maintenance, nuclear pore complex assembly, response to endoplasmic reticulum stress	C4_04800W		Ortholog(s) have role in ER-dependent peroxisome organization, endoplasmic reticulum inheritance, endoplasmic reticulum tubular network maintenance, nuclear pore complex assembly, response to endoplasmic reticulum stress	YDR233C	RTN1	Reticulon protein; involved in nuclear pore assembly and maintenance of tubular ER morphology; promotes membrane curvature; regulates the ER asymmetry-induced inheritance block during ER stress; role in ER-derived peroxisomal biogenesis; increases tubular ER when overexpressed; mutants have reduced phosphatidylserine transfer between the ER and mitochondria; interacts with exocyst subunit Sec6p, …
	CAGL0D03784g	1.43606415885162		Ortholog(s) have unfolded protein binding activity and role in vacuolar acidification, vacuolar proton-transporting V-type ATPase complex assembly	CR_09720W	VMA22	Ortholog(s) have unfolded protein binding activity and role in vacuolar acidification, vacuolar proton-transporting V-type ATPase complex assembly	YHR060W	VMA22	Protein that is required for vacuolar H+-ATPase (V-ATPase) function; peripheral membrane protein; not an actual component of the V-ATPase complex; functions in the assembly of the V-ATPase; localized to the yeast endoplasmic reticulum (ER)
	CAGL0K05203g	1.44407609802744		Ortholog(s) have role in ER-dependent peroxisome organization, cellular protein localization, endoplasmic reticulum inheritance and endoplasmic reticulum tubular network organization, more	C2_08160C		Ortholog(s) have role in ER-dependent peroxisome organization, cellular protein localization, endoplasmic reticulum inheritance and endoplasmic reticulum tubular network organization, more	YPR028W	YOP1	Reticulon-interacting protein; ER integral membrane protein involved in the generation of tubular ER morphology; promotes membrane curvature; forms tubules in vitro; regulates the ER asymmetry-induced inheritance block during ER stress; role in ER-derived peroxisomal biogenesis; interacts with Yip1p to mediate membrane traffic and with Sey1p to maintain ER morphology; facilitates lipid exchange b…
Lipid metabolism	CAGL0A01870g	-3.88091301462576		Has domain(s) with predicted integral component of membrane localization
	CAGL0H08778g	-2.44615314403765		Ortholog(s) have mRNA binding activity, role in nuclear-transcribed mRNA catabolic process, deadenylation-dependent decay and cytoplasm localization				YPR042C	PUF2	PUF family mRNA-binding protein; Pumilio homology domain confers RNA binding activity; preferentially binds mRNAs encoding membrane-associated proteins; binding site composed of two UAAU tetranucleotides, separated by a 3-nt linker; PUF2 has a paralog, JSN1, that arose from the whole genome duplication
	CAGL0J04004g	-1.89986939579236		Ortholog(s) have role in lipid homeostasis, mitochondrion organization and integral component of mitochondrial membrane, mitochondrial outer membrane localization	C7_01750W		Putative mitochondrial outer membrane protein; regulated by Sef1p-, Sfu1p-, and Hap43p	YOR228C	MCP1	Mitochondrial protein of unknown function involved in lipid homeostasis; integral membrane protein that localizes to the mitochondrial outer membrane; involved in mitochondrial morphology; interacts genetically with MDM10, and other members of the ERMES complex; contains five predicted transmembrane domains
	CAGL0H01375g	-1.75308205145561	SUR2	Predicted sphinganine hydroxylase with role in sphingolipid biosynthesis; mutants show reduced sensitivity to caspofungin and increased sensitivity to micafungin	C2_02860W	SUR2	Putative ceramide hydroxylase; predicted enzyme of sphingolipid biosynthesis; regulated by Tsa1, Tsa1B under H2O2 stress conditions; Spider and flow model biofilm induced	YDR297W	SUR2	Sphinganine C4-hydroxylase; catalyses the conversion of sphinganine to phytosphingosine in sphingolipid biosyntheis
	CAGL0J11770g	-1.74036585587461	PLB1	Putative phospholipase B; predicted GPI-anchor	CR_09690C	PLB3	GPI-anchored cell surface phospholipase B; possibly secreted; fungal-specific (no mammalian homolog); induced by Tbf1; fluconazole-induced; possible essential gene (UAU1 method); Spider and flow model biofilm induced	YMR008C	PLB1	Phospholipase B (lysophospholipase) involved in lipid metabolism; required for efficient acyl chain remodeling of newly synthesized phosphatidylethanolamine-derived phosphatidylcholine; required for deacylation of phosphatidylcholine and phosphatidylethanolamine but not phosphatidylinositol; PLB1 has a paralog, PLB3, that arose from the whole genome duplication
	CAGL0A00341g	-1.67386118804836		Ortholog(s) have role in sphingoid catabolic process and endoplasmic reticulum localization	C2_01660C		Protein of unknown function; possible ER protein; Hap43p-repressed; Spider biofilm induced	YGL010W	MPO1	Protein involved in metabolism of phytosphingosine; not an essential gene
	CAGL0K08030g	-1.63823922558717		Ortholog(s) have lipid binding activity and endoplasmic reticulum, nucleus-vacuole junction, plasma membrane, ribosome localization	C5_04050W		Plasma membrane-localized protein of unknown function; Hap43p-repressed gene	YPR091C	NVJ2	Lipid-binding ER protein, enriched at nucleus-vacuolar junctions (NVJ); may be involved in sterol metabolism or signaling at the NVJ; contains a synaptotagmin-like-mitochondrial-lipid binding protein (SMP) domain; binds phosphatidylinositols and other lipids in a large-scale study; may interact with ribosomes, based on co-purification experiments
	CAGL0C05269g	-1.52938178123045		Ortholog(s) have phosphatidylinositol-4,5-bisphosphate 5-phosphatase activity, role in phosphatidylinositol dephosphorylation and endoplasmic reticulum, fungal-type vacuole membrane localization	C5_01920C		Ortholog(s) have phosphatidylinositol-4,5-bisphosphate 5-phosphatase activity, role in phosphatidylinositol dephosphorylation and endoplasmic reticulum, fungal-type vacuole membrane localization	YOL065C	INP54	Phosphatidylinositol 4,5-bisphosphate 5-phosphatase; role in secretion; localizes to the endoplasmic reticulum via the C-terminal tail; lacks the Sac1 domain and proline-rich region found in the other 3 INP proteins
	CAGL0M09713g	-1.47774476394915		Putative protein involved in DNA damage response; gene is upregulated in azole-resistant strain	C2_03750W	YIM1	Protein similar to protease of mitochondrial inner membrane; increased transcription is observed upon benomyl treatment; macrophage-downregulated gene	YMR152W	YIM1	Protein of unknown function; null mutant displays sensitivity to DNA damaging agents; may have a role in lipid metabolism, based on localization to lipid droplets; the authentic, non-tagged protein is detected in highly purified mitochondria in high-throughput studies; protein abundance increases in response to DNA replication stress
	CAGL0K07458g	-1.36720022175466		Ortholog(s) have protein serine/threonine kinase activity	C1_08540C		Putative serine/threonine protein kinase; possibly an essential gene, disruptants not obtained by UAU1 method	YKL126W	YPK1	S/T protein kinase; phosphorylates, downregulates flippase activator Fpk1p; inactivates Orm1p and Orm2p by phosphorylation in response to compromised sphingolipid synthesis; involved in the TORC-dependent phosphorylation of ribosomal proteins Rps6a/b (S6); mutations affect receptor-mediated endocytosis and sphingolipid-mediated and cell integrity signaling pathways; human homolog SGK1 can complem…
	CAGL0F03113g	-1.2163867012699		Ortholog(s) have phosphatidylinositol-3-phosphate binding activity, role in retrograde transport, endosome to Golgi and cytosol, endosome localization	C2_01310W		Ortholog(s) have phosphatidylinositol-3-phosphate binding activity, role in retrograde transport, endosome to Golgi and endosome localization	YDR425W	SNX41	Sorting nexin; involved in the retrieval of late-Golgi SNAREs from the post-Golgi endosome to the trans-Golgi network; interacts with Snx4p
	CAGL0G05313g	-1.20475968449519		Ortholog(s) have transferase activity, transferring phosphorus-containing groups activity	C1_09120W	IPT1	Inositol phosphoryl transferase; catalyzes the synthesis of the most abundant sphingolipid, mannose-(inositol-P)2-ceramide, M(IP)2C, from MIPC; required for wild-type membrane localization of Cdr1; Spider biofilm induced	YDR072C	IPT1	Inositolphosphotransferase; involved in synthesis of mannose-(inositol-P)2-ceramide (M(IP)2C), the most abundant sphingolipid; can mutate to resistance to the antifungals syringomycin E and DmAMP1 and to K. lactis zymocin
	CAGL0I09328g	-1.12636063070738		Ortholog(s) have 3-dehydrosphinganine reductase activity, role in 3-keto-sphinganine metabolic process, sphingolipid biosynthetic process and endoplasmic reticulum, lipid particle, mitochondrial outer membrane localization	CR_07380C	KSR1	3-ketosphinganine reductase, catalyzes the second step in phytosphingosine synthesis	YBR265W	TSC10	3-ketosphinganine reductase; catalyzes the second step in phytosphingosine synthesis; essential for growth in the absence of exogenous dihydrosphingosine or phytosphingosine; localized to lipid droplets; member of short chain dehydrogenase/reductase protein family
	CAGL0A04103g	-1.100231559034		Ortholog(s) have phosphatidic acid transporter activity and role in cardiolipin metabolic process, phospholipid translocation, positive regulation of phosphatidylcholine biosynthetic process	CR_09620C		Ortholog(s) have phosphatidic acid transporter activity and role in cardiolipin metabolic process, phospholipid translocation, positive regulation of phosphatidylcholine biosynthetic process	YLR193C	UPS1	Phosphatidic acid transfer protein; plays a role in phospholipid metabolism by transporting phosphatidic acid from the outer to the inner mitochondrial membrane; localizes to the mitochondrial intermembrane space; null mutant has altered cardiolipin and phosphatidic acid levels; ortholog of human PRELI
	CAGL0K07293g	-1.04068854324073		Ortholog(s) have long-chain fatty acid-CoA ligase activity and role in long-chain fatty acid import, long-chain fatty-acyl-CoA metabolic process, sphingoid long-chain base transport	CR_10160W	FAA4	Predicted acyl CoA synthase	YMR246W	FAA4	Long chain fatty acyl-CoA synthetase; activates fatty acids with a preference for C12:0-C16:0 chain lengths; role in the competitive import of long-chain fatty acids and sphingoid long-chain bases; role in stationary phase survival; localizes to lipid particles and the plasma membrane; role in sphingolipid-to-glycerolipid metabolism; forms cytoplasmic foci upon replication stress; faa1 faa4 doubl…
	CAGL0J06952g	1.03903858140228		Ortholog(s) have isopentenyl-diphosphate delta-isomerase activity, role in farnesyl diphosphate biosynthetic process and cytosol, nucleus localization	C4_02280W	IDI1	Ortholog(s) have isopentenyl-diphosphate delta-isomerase activity, role in farnesyl diphosphate biosynthetic process and cytosol, nucleus localization	YPL117C	IDI1	Isopentenyl diphosphate:dimethylallyl diphosphate isomerase; catalyzes an essential activation step in the isoprenoid biosynthetic pathway; required for viability; isopentenyl diphosphate:dimethylallyl diphosphate isomerase is also known as IPP isomerase
	CAGL0D04290g	1.04651137950607	SEC14	Ortholog(s) have phosphatidylcholine binding, phosphatidylinositol binding activity and nucleus localization				YKL091C	YKL091C	Putative phosphatidylinositol/phosphatidylcholine transfer protein; possibly involved in lipid metabolism; localizes to the nucleus; contains a CRAL/TRIO domain and binds several lipids in a large-scale study; YKL091C has a paralog, SEC14, that arose from the whole genome duplication
	CAGL0I04334g	1.06990755158683		Ortholog(s) have sphingosine-1-phosphate phosphatase activity, role in calcium-mediated signaling and endoplasmic reticulum localization	C1_01400C		Ortholog(s) have sphingosine-1-phosphate phosphatase activity, role in calcium-mediated signaling and endoplasmic reticulum localization	YJL134W	LCB3	Long-chain base-1-phosphate phosphatase; specific for dihydrosphingosine-1-phosphate, regulates ceramide and long-chain base phosphates levels, involved in incorporation of exogenous long chain bases in sphingolipids; LCB3 has a paralog, YSR3, that arose from the whole genome duplication
	CAGL0M06237g	1.0808538550145		Ortholog(s) have alcohol O-butanoyltransferase activity, serine hydrolase activity, short-chain carboxylesterase activity and role in medium-chain fatty acid biosynthetic process, medium-chain fatty acid catabolic process	C1_03390W	EHT1	Putative acyl-coenzymeA:ethanol O-acyltransferase; regulated by Sef1, Sfu1, and Hap43; induced by alpha pheromone in SpiderM medium; Spider biofilm induced; promoter bound by Ndt80	YBR177C	EHT1	Acyl-coenzymeA:ethanol O-acyltransferase; plays a minor role in medium-chain fatty acid ethyl ester biosynthesis; possesses short-chain esterase activity; localizes to lipid particles and the mitochondrial outer membrane; EHT1 has a paralog, EEB1, that arose from the whole genome duplication
	CAGL0I00330g	1.08556437888662		Ortholog(s) have role in phospholipid biosynthetic process and endoplasmic reticulum localization	C4_04180C		Ortholog(s) have role in phospholipid biosynthetic process and endoplasmic reticulum localization	YGL126W	SCS3	Protein required for inositol prototrophy; required for normal ER membrane biosynthesis; ortholog of the FIT family of proteins involved in triglyceride droplet biosynthesis and homologous to human FIT2; disputed role in the synthesis of inositol phospholipids from inositol
	CAGL0I09746g	1.09254809538777		Ortholog(s) have phosphoenolpyruvate transmembrane transporter activity, role in ER to Golgi vesicle-mediated transport, phosphoenolpyruvate transmembrane import into Golgi lumen and Golgi apparatus, endoplasmic reticulum localization	C6_00590W	SLY41	Protein involved in ER-to-Golgi transport; rat catheter and Spider biofilm induced	YOR307C	SLY41	Protein involved in ER-to-Golgi transport
	CAGL0F07535g	1.10480195143474		Ortholog(s) have acylglycerol lipase activity, serine hydrolase activity, role in triglyceride metabolic process and endoplasmic reticulum, lipid particle, mitochondrial outer membrane, plasma membrane localization	C1_09980C		Ortholog(s) have acylglycerol lipase activity, serine hydrolase activity, role in triglyceride metabolic process and endoplasmic reticulum, lipid particle, mitochondrial outer membrane, plasma membrane localization	YKL094W	YJU3	Monoglyceride lipase (MGL); functional ortholog of mammalian MGL, localizes to lipid particles and membranes, also member of the eukaryotic serine hydrolase family
	CAGL0I00462g	1.12026965245375		Ortholog(s) have role in cotranslational protein targeting to membrane and cytosol, endoplasmic reticulum membrane localization	C3_07120W		Protein with a predicted role in cotranslational protein targeting to membrane; induced during chlamydospore formation in both C. albicans and C. dubliniensis	YLR301W	HRI1	Protein of unknown function that interacts with Sec72p and Hrr25p
	CAGL0B01947g	1.17626591465989	INO2	Transcriptional regulator involved in de novo inositol biosynthesis; activator of INO1 gene expression; mutants unable to grow in the absence of inositol				YDR123C	INO2	Transcription factor; component of the heteromeric Ino2p/Ino4p basic helix-loop-helix transcription activator that binds inositol/choline-responsive elements (ICREs), required for derepression of phospholipid biosynthetic genes in response to inositol depletion; involved in diauxic shift
	CAGL0G08085g	1.29334662458254		Ortholog(s) have phospholipid-translocating ATPase activity				YDR093W	DNF2	Aminophospholipid translocase (flippase); type 4 P-type ATPase; involved in phospholipid translocation, contributing to endocytosis, protein transport, and cellular polarization; localizes primarily to the plasma membrane; localizes to the shmoo tip where it has a redundant role in the cellular response to mating pheromone; DNF2 has a paralog, DNF1, that arose from the whole genome duplication
	CAGL0C02717g	1.33164381511703		Ortholog(s) have phosphoprotein phosphatase activity and role in negative regulation of phospholipid biosynthetic process, nuclear envelope organization, positive regulation of phosphatidate phosphatase activity, protein dephosphorylation	C2_05740W	SPO7	Putative regulatory subunit of Nem1-Spo7 phosphatase holoenzyme that regulates nuclear growth by controling phospholipid biosynthesis; induced by alpha pheromone in SpiderM medium	YAL009W	SPO7	Putative regulatory subunit of Nem1p-Spo7p phosphatase holoenzyme; regulates nuclear growth by controlling phospholipid biosynthesis, required for normal nuclear envelope morphology, premeiotic replication, and sporulation
	CAGL0M04367g	1.38034873985515		Ortholog(s) have choline kinase activity, ethanolamine kinase activity, role in phosphatidylcholine biosynthetic process, phosphatidylethanolamine biosynthetic process and cytosol, nucleus localization	C3_05300C		Ortholog(s) have choline kinase activity, ethanolamine kinase activity, role in phosphatidylcholine biosynthetic process, phosphatidylethanolamine biosynthetic process and cytosol, nucleus localization	YLR133W	CKI1	Choline kinase; catalyzes the first step in phosphatidylcholine synthesis via the CDP-choline (Kennedy pathway); exhibits some ethanolamine kinase activity contributing to phosphatidylethanolamine synthesis via the CDP-ethanolamine pathway; CKI1 has a paralog, EKI1, that arose from the whole genome duplication
	CAGL0K04103g	1.39994600548092		Ortholog(s) have dolichyldiphosphatase activity, role in lipid biosynthetic process, protein N-linked glycosylation and integral component of endoplasmic reticulum membrane localization	C1_02250W	CWH8	Putative dolichyl pyrophosphate (Dol-P-P) phosphatase; ketoconazole-induced; expression is increased in a fluconazole-resistant isolate; clade-associated gene expression; Hap43p-induced gene	YGR036C	CAX4	Dolichyl pyrophosphate (Dol-P-P) phosphatase; has a luminally oriented active site in the ER; cleaves the anhydride linkage in Dol-P-P; required for Dol-P-P-linked oligosaccharide intermediate synthesis and protein N-glycosylation
	CAGL0I00418g	1.41239265640741		Ortholog(s) have electron carrier activity, stearoyl-CoA 9-desaturase activity	C1_08360C	OLE1	Fatty acid desaturase, essential protein involved in oleic acid synthesis; required for aerobic hyphal growth and chlamydospore formation; subject to hypoxic regulation; fluconazole-induced; caspofungin repressed; Hap43p-induced	YGL055W	OLE1	Delta(9) fatty acid desaturase; required for monounsaturated fatty acid synthesis and for normal distribution of mitochondria
	CAGL0I06050g	1.49527197951874	INO1	Putative inositol 1-phosphate synthase; regulated by the transcriptional activators Ino2p and Ino4p; protein differentially expressed in azole resistant strain	CR_10100C	INO1	Inositol-1-phosphate synthase; antigenic in human; repressed by farnesol in biofilm or by caspofungin; upstream inositol/choline regulatory element; glycosylation predicted; rat catheter, flow model induced; Spider biofilm repressed	YJL153C	INO1	Inositol-3-phosphate synthase; involved in synthesis of inositol phosphates and inositol-containing phospholipids; transcription is coregulated with other phospholipid biosynthetic genes by Ino2p and Ino4p, which bind the UASINO DNA element
	CAGL0E01309g	1.50037733456484		Ortholog(s) have choline kinase activity, ethanolamine kinase activity, role in phosphatidylcholine biosynthetic process, phosphatidylethanolamine biosynthetic process and cytoplasm localization				YDR147W	EKI1	Ethanolamine kinase; primarily responsible for phosphatidylethanolamine synthesis via the CDP-ethanolamine pathway; exhibits some choline kinase activity, thus contributing to phosphatidylcholine synthesis via the CDP-choline pathway; EKI1 has a paralog, CKI1, that arose from the whole genome duplication
	CAGL0L00847g	1.53794065012536		Ortholog(s) have cytochrome-b5 reductase activity, acting on NAD(P)H activity and endoplasmic reticulum, mitochondrial outer membrane, nucleus, plasma membrane localization	C4_05450C	CBR1	Putative cytochrome B5 reductase; plasma membrane-localized	YIL043C	CBR1	Cytochrome b reductase; not essential for viability; also detected in mitochondria; mutation in conserved NADH binding domain of the human ortholog results in type I methemoglobinemia
	CAGL0K02959g	1.62596274815806		Ortholog(s) have phosphoprotein phosphatase activity and role in negative regulation of phospholipid biosynthetic process, nuclear envelope organization, positive regulation of phosphatidate phosphatase activity, protein dephosphorylation	C4_01300W		Ortholog(s) have phosphoprotein phosphatase activity and role in negative regulation of phospholipid biosynthetic process, nuclear envelope organization, positive regulation of phosphatidate phosphatase activity, protein dephosphorylation	YHR004C	NEM1	Probable catalytic subunit of Nem1p-Spo7p phosphatase holoenzyme; regulates nuclear growth by controlling phospholipid biosynthesis, required for normal nuclear envelope morphology and sporulation; homolog of the human protein Dullard
	CAGL0H07513g	1.81485554834466	IFA38	Predicted ketoreductase involved in production of very long chain fatty acid for sphingolipid biosynthesis; mutants show reduced sensitivity to caspofungin and increased sensitivity to micafungin	CR_06070W		Putative microsomal beta-keto-reductase; transcript upregulated by treatment with ciclopirox olamine; induced by alpha pheromone in SpiderM medium; regulated by Sef1, Sfu1, and Hap43	YBR159W	IFA38	Microsomal beta-keto-reductase; contains oleate response element (ORE) sequence in the promoter region; mutants exhibit reduced VLCFA synthesis, accumulate high levels of dihydrosphingosine, phytosphingosine and medium-chain ceramides
	CAGL0L04642g	1.82752052652897		Ortholog(s) have 1-acylglycerol-3-phosphate O-acyltransferase activity, 1-acylglycerophosphocholine O-acyltransferase activity, role in glycerophospholipid biosynthetic process and endoplasmic reticulum, ribosome localization	C2_07480W	LPT1	Lysophospholipid acyltransferase, involved in phospholipid remodeling; role in glycerophospholipid biosynthesis; rat catheter biofilm repressed	YOR175C	ALE1	Broad-specificity lysophospholipid acyltransferase; part of MBOAT family of membrane-bound O-acyltransferases; key component of Lands cycle; may have role in fatty acid exchange at sn-2 position of mature glycerophospholipids
	CAGL0J02970g	1.85551622605975		Ortholog(s) have mitochondrion localization	C3_05070W	CEM1	Protein similar to S. cerevisiae Cem1p, an acyl carrier protein involved in fatty acid biosynthesis; likely to be essential for growth, based on an insertional mutagenesis strategy	YER061C	CEM1	Mitochondrial beta-keto-acyl synthase; possible role in fatty acid synthesis; required for mitochondrial respiration; human homolog OXSM can complement yeast cem1 null mutant
	CAGL0H09878g	1.92341385536309	IPP1	Inorganic pyrophosphatase, cytoplasmic
	CAGL0L08184g	1.98779625357107	FEN1	Predicted fatty acid elongase with role in sphingolipid biosynthetic process; mutants show reduced sensitivity to caspofungin and increased sensitivity to micafungin	C1_12790C	FEN1	Putative fatty acid elongase; predicted role in sphingolipid biosynthesis; possibly an essential gene, disruptants not obtained by UAU1 method; Spider and flow model biofilm induced	YCR034W	ELO2	Fatty acid elongase, involved in sphingolipid biosynthesis; acts on fatty acids of up to 24 carbons in length; mutations have regulatory effects on 1,3-beta-glucan synthase, vacuolar ATPase, and the secretory pathway; ELO2 has a paralog, ELO1, that arose from the whole genome duplication; lethality of the elo2 elo3 double null mutation is functionally complemented by human ELOVL1 and weakly compl…
	CAGL0H03399g	2.44970030301462		Ortholog(s) have (R)-carnitine transmembrane transporter activity, choline transmembrane transporter activity, ethanolamine transmembrane transporter activity	C2_00550W		Ortholog(s) have (R)-carnitine transmembrane transporter activity, choline transmembrane transporter activity, ethanolamine transmembrane transporter activity	YGL077C	HNM1	Plasma membrane transporter for choline, ethanolamine, and carnitine; involved in the uptake of nitrogen mustard and the uptake of glycine betaine during hypersaline stress; co-regulated with phospholipid biosynthetic genes and negatively regulated by choline and myo-inositol
	CAGL0D00528g	2.63652789314031		Ortholog(s) have 3-hydroxyacyl-[acyl-carrier-protein] dehydratase activity, [acyl-carrier-protein] S-acetyltransferase activity and [acyl-carrier-protein] S-malonyltransferase activity, more	C5_00190C	FAS1	Beta subunit of fatty-acid synthase; multifunctional enzyme; Hap43, fluconazole-induced; amphotericin B, caspofungin repressed; macrophage/pseudohyphal-induced; flow model and Spider biofilm repressed	YKL182W	FAS1	Beta subunit of fatty acid synthetase; complex catalyzes the synthesis of long-chain saturated fatty acids; contains acetyltransacylase, dehydratase, enoyl reductase, malonyl transacylase, and palmitoyl transacylase activities
	CAGL0E06138g	2.6868833625579		Ortholog(s) have fatty acid synthase activity, role in palmitic acid biosynthetic process, response to pH and fatty acid synthase complex, glyoxysome localization
	CAGL0I05940g	2.94323266571164		Ortholog(s) have phosphatidylinositol transporter activity	C1_10270C	SFH5	Putative phosphatidylinositol transporter; rat catheter and Spider biofilm repressed	YJL145W	SFH5	Non-classical phosphatidylinositol transfer protein (PITP); exhibits PI- but not PC-transfer activity; localizes to the peripheral endoplasmic reticulum, cytosol and microsomes; similar to Sec14p; partially relocalizes to the plasma membrane upon DNA replication stress
	CAGL0I04070g	3.00073831928014		Ortholog(s) have 1-acylglycerol-3-phosphate O-acyltransferase activity, role in glycerophospholipid biosynthetic process and endoplasmic reticulum, lipid particle, plasma membrane localization	C3_02600C	SLC1	Putative fatty acyltransferase; protein repressed during the mating process	YDL052C	SLC1	1-acyl-sn-glycerol-3-phosphate acyltransferase; catalyzes the acylation of lysophosphatidic acid to form phosphatidic acid, a key intermediate in lipid metabolism; enzymatic activity detected in lipid particles and microsomes
	CAGL0H08712g	3.66985249965408		Has domain(s) with predicted phosphatidylinositol binding activity and role in cell communication
	CAGL0L10780g	3.76906082568599		Ortholog(s) have acetyl-CoA carboxylase activity, role in fatty acid biosynthetic process and cytosol, fungal-type vacuole membrane, mitochondrion localization				YMR207C	HFA1	Mitochondrial acetyl-coenzyme A carboxylase; catalyzes production of malonyl-CoA in mitochondrial fatty acid biosynthesis; relocalizes from mitochondrion to cytoplasm upon DNA replication stress; genetic and comparative analysis suggests that translation begins at a non-canonical (Ile) start codon at -372 relative to the annotated start codon
Ergosterol biosynthesis	CAGL0M10571g	-2.60663182064951		Ortholog(s) have ergosterol O-acyltransferase activity, role in ergosterol metabolic process and endoplasmic reticulum localization	C2_06940C	ARE2	Acyl CoA:sterol acyltransferase; uses cholesterol and oleoyl-CoA substrates; protoberberine derivative drug inhibits enzyme activity; ketoconazole-induced; Hap43-repressed; flow model biofilm induced; Spider biofilm induced	YNR019W	ARE2	Acyl-CoA:sterol acyltransferase; endoplasmic reticulum enzyme that contributes the major sterol esterification activity in the presence of oxygen; ARE2 has a paralog, ARE1, that arose from the whole genome duplication
	CAGL0F01419g	-2.3393541054118	AUS1	ATP-binding cassette transporter involved in sterol uptake				YOR011W	AUS1	Plasma membrane sterol transporter of the ATP-binding cassette family; required, along with Pdr11p, for uptake of exogenous sterols and their incorporation into the plasma membrane; activity is stimulated by phosphatidylserine; sterol uptake is required for anaerobic growth because sterol biosynthesis requires oxygen; AUS1 has a paralog, PDR11, that arose from the whole genome duplication
	CAGL0J02684g	-1.31670788879883		Ortholog(s) have protein binding, bridging activity, role in ergosterol biosynthetic process and endoplasmic reticulum membrane localization	C2_01090C	ERG28	Ortholog(s) have protein binding, bridging activity, role in ergosterol biosynthetic process and endoplasmic reticulum membrane localization	YER044C	ERG28	Endoplasmic reticulum membrane protein; may facilitate protein-protein interactions between the Erg26p dehydrogenase and the Erg27p 3-ketoreductase and/or tether these enzymes to the ER, also interacts with Erg6p
	CAGL0L03828g	-1.07531271060378		Ortholog(s) have electron carrier activity, role in ergosterol biosynthetic process and endoplasmic reticulum membrane localization	C7_00700W	CYB5	Cytochrome b(5); ortholog of S. cerevisiae Cyb5; induced in high iron; fluconazole-induced; shows colony morphology-related gene regulation by Ssn6; mutants are viable	YNL111C	CYB5	Cytochrome b5; involved in the sterol and lipid biosynthesis pathways; acts as an electron donor to support sterol C5-6 desaturation
	CAGL0L10714g	1.31011806705941	ERG2	C-8 sterol isomerase	C1_00800C	ERG2	C-8 sterol isomerase; enzyme of ergosterol biosynthesis; converts fecosterol to episterol; mutant is hypersensitive to multiple drugs; ketoconazole-induced; flow model and Spider biofilm repressed	YMR202W	ERG2	C-8 sterol isomerase; catalyzes isomerization of delta-8 double bond to delta-7 position at an intermediate step in ergosterol biosynthesis; transcriptionally down-regulated when ergosterol is in excess; mutation is functionally complemented by human EBP
	CAGL0F03993g	1.33568136741782	ERG8	Ortholog(s) have phosphomevalonate kinase activity	C4_01870C	ERG8	Putative phosphomevalonate kinase; enzyme of the mevalonate pathway of isoprenoid biosynthesis; transcript regulated by Nrg1; possible drug target; not conserved in H. sapiens	YMR220W	ERG8	Phosphomevalonate kinase; an essential cytosolic enzyme that acts in the biosynthesis of isoprenoids and sterols, including ergosterol, from mevalonate
	CAGL0L12364g	1.97093105005441		Ortholog(s) have acetyl-CoA C-acetyltransferase activity, role in ergosterol biosynthetic process and cytosol, nucleus localization	C2_04310W	ERG10	Acetyl-CoA acetyltransferase; role in ergosterol biosynthesis; soluble in hyphae; changes in protein abundance associated with azole resistance; fluconazole or ketoconazole induced; macrophage-downregulated protein; GlcNAc-induced protein	YPL028W	ERG10	Acetyl-CoA C-acetyltransferase (acetoacetyl-CoA thiolase); cytosolic enzyme that transfers an acetyl group from one acetyl-CoA molecule to another, forming acetoacetyl-CoA; involved in the first step in mevalonate biosynthesis; human ACAT1 functionally complements the growth defect caused by repression of ERG10 expression
Response to drugs	CAGL0M04763g	-2.3565797510508		Ortholog(s) have role in cellular response to drug and cytosol, nucleus localization	C2_00770W		Putative protein of unknown function; Hap43p-repressed gene; mutation confers hypersensitivity to toxic ergosterol analog, and to amphotericin B	YOR289W	YOR289W	Putative protein of unknown function; transcription induced by the unfolded protein response; green fluorescent protein (GFP)-fusion protein localizes to both the cytoplasm and the nucleus
	CAGL0G05566g	-2.13837310415967		Ortholog(s) have role in ascospore formation, cellular response to drug, fungal-type cell wall organization	C7_02240W	FMP45	Predicted membrane protein induced during mating; mutation confers hypersensitivity to toxic ergosterol analog, to amphotericin B; alkaline repressed; repressed by alpha pheromone in SpiderM medium; rat catheter, Spider biofilm induced	YDL222C	FMP45	Integral membrane protein localized to mitochondria; required for sporulation and maintaining sphingolipid content; similar to SUR7; FMP45 has a paralog, YNL194C, that arose from the whole genome duplication
	CAGL0F02717g	-2.07054320251719	PDH1	Multidrug transporter, predicted plasma membrane ATP-binding cassette (ABC) transporter; regulated by Pdr1p; involved in fluconazole resistance				YDR406W	PDR15	Plasma membrane ATP binding cassette (ABC) transporter; multidrug transporter and general stress response factor implicated in cellular detoxification; regulated by Pdr1p, Pdr3p and Pdr8p; promoter contains a PDR responsive element; PDR15 has a paralog, PDR5, that arose from the whole genome duplication
	CAGL0M08552g	-1.62202886134619		Ortholog(s) have phosphatidic acid binding, phosphatidylinositol-3,5-bisphosphate binding, phosphatidylinositol-3-phosphate binding, sphingolipid binding activity	C3_01910C		Ortholog(s) have phosphatidic acid binding, phosphatidylinositol-3,5-bisphosphate binding, phosphatidylinositol-3-phosphate binding, sphingolipid binding activity	YDR276C	PMP3	Small plasma membrane protein; confers resistance to amphotericin B and is a potential target of this common antifungal drug; related to a family of plant polypeptides that are overexpressed under high salt concentration or low temperature; not essential for viability; deletion causes hyperpolarization of the plasma membrane potential
	CAGL0G01122g	-1.43906480940674		Putative protein; gene is upregulated in azole-resistant strain				YLR346C	YLR346C	Protein of unknown function found in mitochondria; expression is regulated by transcription factors involved in pleiotropic drug resistance, Pdr1p and Yrr1p; not an essential gene; YLR346C has a paralog, YGR035C, that arose from the whole genome duplication
	CAGL0E03674g	-1.29736540476397	TPO1_2	Putative drug:H+ antiporter, involved in efflux of clotrimazole; required for resistance to clotrimazole and other drugs
	CAGL0F03069g	-1.24666448543314	CAD1	bZIP domain-containing protein				YDR423C	CAD1	AP-1-like basic leucine zipper (bZIP) transcriptional activator; involved in stress responses, iron metabolism, and pleiotropic drug resistance; controls a set of genes involved in stabilizing proteins; binds consensus sequence TTACTAA; CAD1 has a paralog, YAP1, that arose from the whole genome duplication
	CAGL0M10307g	-1.20003281154036		Ortholog(s) have inositol phosphoceramide synthase activity and role in cellular response to drug, inositolphosphoceramide metabolic process, sphingolipid biosynthetic process	C5_01240W	AUR1	Inositolphosphorylceramide (IPC) synthase; catalyzes the key step in sphingolipid biosynthesis; antifungal drug target; flow model biofilm induced; Spider biofilm induced	YKL004W	AUR1	Phosphatidylinositol:ceramide phosphoinositol transferase; required for sphingolipid synthesis; can mutate to confer aureobasidin A resistance; also known as IPC synthase
	CAGL0I10384g	-1.17908308657211	TPO3	Predicted polyamine transporter of the major facilitator superfamily; required for azole resistance	C1_08790W	TPO3	Putative polyamine transporter; MFS-MDR family; induced by Sfu1, regulated upon white-opaque; decreased expression in hyphae vs yeast-form cells; regulated by Nrg1; Spider biofilm repressed	YGR138C	TPO2	Polyamine transporter of the major facilitator superfamily; member of the 12-spanner drug:H(+) antiporter DHA1 family; specific for spermine; localizes to the plasma membrane; transcription of TPO2 is regulated by Haa1p; TPO2 has a paralog, TPO3, that arose from the whole genome duplication
	CAGL0G08624g	-1.15485871518729	QDR2	Drug:H+ antiporter of the Major Facilitator Superfamily, confers imidazole drug resistance, involved in quinidine/multidrug efflux; gene is activated by Pdr1p; upregulated in azole-resistant strain	CR_04210C	QDR1	Putative antibiotic resistance transporter; regulated by white-opaque switch, Nrg1, Tup1; Hap43, caspofungin repressed; repressed during chlamydospore formation; flow model biofilm induced; Spider biofilm repressed	YIL120W	QDR1	Multidrug transporter of the major facilitator superfamily; member of the 12-spanner drug:H(+) antiporter DHA1 family; involved in spore wall assembly; sequence similarity to DTR1 and QDR3, and the triple mutant dtr1 qdr1 qdr3 exhibits reduced dityrosine fluorescence relative to the single mutants; required for resistance to quinidine, ketoconazole, fluconazole, and barban; QDR1 has a paralog, AQ…
	CAGL0I08503g	-1.09903950178777		Ortholog(s) have phosphoadenylyl-sulfate reductase (thioredoxin) activity and role in cellular response to drug, sulfate assimilation, phosphoadenylyl sulfate reduction by phosphoadenylyl-sulfate reductase (thioredoxin)	C4_07030W	MET16	Putative 3'-phosphoadenylsulfate reductase; sulfur amino acid metabolism; reports differ on regulation during biofilm formation; fungal-specific; possibly an essential gene, disruptants not obtained by UAU1 method; Hap43p-repressed gene	YPR167C	MET16	3'-phosphoadenylsulfate reductase; reduces 3'-phosphoadenylyl sulfate to adenosine-3',5'-bisphosphate and free sulfite using reduced thioredoxin as cosubstrate, involved in sulfate assimilation and methionine metabolism
	CAGL0B02079g	-1.05766730560832		Ortholog(s) have azole transporter activity, role in asperfuranone biosynthetic process, azole transport and plasma membrane localization				YGR224W	AZR1	Plasma membrane transporter of the major facilitator superfamily; involved in resistance to azole drugs such as ketoconazole and fluconazole
	CAGL0L04466g	-1.04759909061909		Ortholog(s) have GTPase activity and role in cellular response to drug, endoplasmic reticulum inheritance, endoplasmic reticulum membrane fusion, hexose transport, pathogenesis	C6_04570W	NAG6	Protein required for wild-type mouse virulence and wild-type cycloheximide resistance; putative GTP-binding motif; similar to S. cerevisiae Yor165Wp; in gene cluster that encodes enzymes of GlcNAc catabolism; no human or murine homolog	YOR165W	SEY1	Dynamin-like GTPase that mediates homotypic ER fusion; has a role in ER morphology; interacts physically and genetically with Yop1p and Rtn1p; functional ortholog of the human atlastin ATL1, defects in which cause a form of the human disease hereditary spastic paraplegia; homolog of Arabidopsis RHD3
	CAGL0M01738g	1.07981805114753		Ortholog(s) have structural molecule activity, role in cellular response to drug, conjugation with cellular fusion, histone acetylation, protein complex assembly and SAGA complex, SLIK (SAGA-like) complex, mitochondrion localization	CR_09980W	SPT7	Putative SAGA transcriptional regulatory complex subunit; mutation confers hypersensitivity to toxic ergosterol analog, and to amphotericin B	YBR081C	SPT7	Subunit of the SAGA transcriptional regulatory complex; involved in proper assembly of the complex; also present as a C-terminally truncated form in the SLIK/SALSA transcriptional regulatory complex
	CAGL0B02343g	1.16107209562374		Putative multidrug efflux pump of major facilitator superfamily; gene is downregulated in azole-resistant strain				YML116W	ATR1	Multidrug efflux pump of the major facilitator superfamily; required for resistance to aminotriazole and 4-nitroquinoline-N-oxide; ATR1 has a paralog, YMR279C, that arose from the whole genome duplication; protein abundance increases in response to DNA replication stress
	CAGL0J09944g	1.35059902981903	AQR1	Plasma membrane drug:H+ antiporter involved in resistance to drugs and acetic acid				YNL065W	AQR1	Plasma membrane transporter of the major facilitator superfamily; member of the 12-spanner drug:H(+) antiporter DHA1 family; confers resistance to short-chain monocarboxylic acids and quinidine; involved in the excretion of excess amino acids; AQR1 has a paralog, QDR1, that arose from the whole genome duplication; relocalizes from plasma membrane to cytoplasm upon DNA replication stress
	CAGL0L00869g	1.71624380620693		Ortholog(s) have pyruvate dehydrogenase (acetyl-transferring) kinase activity, role in carbon utilization, cellular response to drug, peptidyl-serine phosphorylation and mitochondrion localization	CR_08860W	PDK2	Putative pyruvate dehydrogenase kinase; mutation confers hypersensitivity to amphotericin B	YIL042C	PKP1	Mitochondrial protein kinase; involved in negative regulation of pyruvate dehydrogenase complex activity by phosphorylating the ser-133 residue of the Pda1p subunit; acts in concert with kinase Pkp2p and phosphatases Ptc5p and Ptc6p
	CAGL0C05555g	1.78498661748683		Ortholog(s) have guanine deaminase activity, role in cellular response to drug and cytosol localization	C7_00870W		Putative guanine deaminase; mutation confers hypersensitivity to toxic ergosterol analog; Spider biofilm induced	YDL238C	GUD1	Guanine deaminase; a catabolic enzyme of the guanine salvage pathway producing xanthine and ammonia from guanine; activity is low in exponentially-growing cultures but expression is increased in post-diauxic and stationary-phase cultures
Response to stress	CAGL0G05269g	-2.86252551572596		Putative mitochondrial protein; gene is downregulated in azole-resistant strain				YDR070C	FMP16	Protein of unknown function; may be involved in responding to conditions of stress; the authentic, non-tagged protein is detected in highly purified mitochondria in high-throughput studies; protein abundance increases in response to DNA replication stress
	CAGL0G03289g	-2.42527058598609	SSA3	Heat shock protein of the HSP70 family	C1_13480W	HSP70	Putative hsp70 chaperone; role in entry into host cells; heat-shock, amphotericin B, cadmium, ketoconazole-induced; surface localized in yeast and hyphae; antigenic in host; farnesol-downregulated in biofilm; Spider biofilm induced	YER103W	SSA4	Heat shock protein that is highly induced upon stress; plays a role in SRP-dependent cotranslational protein-membrane targeting and translocation; member of the HSP70 family; cytoplasmic protein that concentrates in nuclei upon starvation; SSA4 has a paralog, SSA3, that arose from the whole genome duplication
	CAGL0C04741g	-2.37027164196275	SOD1	Cytosolic copper-zinc superoxide dismutase	C4_02320C	SOD1	Cytosolic copper- and zinc-containing superoxide dismutase; role in protection from oxidative stress; required for full virulence; alkaline induced by Rim101; induced by human blood; rat catheter, flow model and Spider biofilm repressed	YJR104C	SOD1	Cytosolic copper-zinc superoxide dismutase; detoxifies superoxide; stabilizes Yck1p and Yck2p kinases in glucose to repress respiration; phosphorylated by Dun1p, enters nucleus under oxidative stress to promote transcription of stress response genes; human ortholog SOD1 implicated in ALS complements a null allele; abundance increases under DNA replication stress and during exposure to boric acid;…
	CAGL0J08613g	-2.26292293318458		Ortholog(s) have calcium activated cation channel activity, calcium channel activity, potassium channel activity, sodium channel activity, voltage-gated ion channel activity	C2_07730W	YVC1	Putative vacuolar cation channel shock; repressed by alpha pheromone in SpiderM medium; flow model biofilm repressed	YOR087W	YVC1	Vacuolar cation channel; mediates release of Ca(2+) from the vacuole in response to hyperosmotic shock
	CAGL0K12958g	-2.02495576305155		Putative stress-induced alcohol dehydrogenase; gene is upregulated in azole-resistant strain
	CAGL0J06820g	-1.93947147757128		Ortholog(s) have endoribonuclease activity, role in RNA catabolic process, apoptotic process, cell morphogenesis and cytosol, extracellular region, fungal-type vacuole localization	C5_04400W	RNY11	Ortholog(s) have endoribonuclease activity, role in RNA catabolic process, apoptotic process, cell morphogenesis and cytosol, extracellular region, fungal-type vacuole localization	YPL123C	RNY1	Vacuolar RNase of the T(2) family; relocalizes to the cytosol where it cleaves tRNAs upon oxidative or stationary phase stress; required for tRNA-specific translational pausing suring oxidative stress; promotes apoptosis under stress conditions and this function is independent of Rny1p catalytic activity
	CAGL0F07953g	-1.88589620810547		Ortholog(s) have endoplasmic reticulum, mitochondrion localization				YGR236C	SPG1	Protein required for high temperature survival during stationary phase; not required for growth on nonfermentable carbon sources; the authentic, non-tagged protein is detected in highly purified mitochondria in high-throughput studies
	CAGL0E05984g	-1.88393227059029		Ortholog of S. cerevisiae : GRE1 and Saccharomyces cerevisiae S288C : YPL223C				YPL223C	GRE1	Hydrophilin essential in desiccation-rehydration process; stress induced (osmotic, ionic, oxidative, heat shock and heavy metals); regulated by the HOG pathway; GRE1 has a paralog, SIP18, that arose from the whole genome duplication
	CAGL0L02431g	-1.87676632120402		Has domain(s) with predicted role in cell redox homeostasis
	CAGL0K10868g	-1.78141159201152	CTA1	Putative catalase A; gene is downregulated in azole-resistant strain; regulated by oxidative stress and glucose starvation; protein abundance increased in ace2 mutant cells
	CAGL0H06611g	-1.71832180038471		Ortholog of S. cerevisiae : ESL1, C. albicans SC5314 : C4_01020C_A, C. dubliniensis CD36 : Cd36_41030, C. parapsilosis CDC317 : CPAR2_401340 and Candida tenuis NRRL Y-1498 : CANTEDRAFT_104645	C4_01020C		Ortholog of S. cerevisiae : ESL1, C. glabrata CBS138 : CAGL0H06611g, C. dubliniensis CD36 : Cd36_41030, C. parapsilosis CDC317 : CPAR2_401340 and Candida tenuis NRRL Y-1498 : CANTEDRAFT_104645	YIL151C	ESL1	hEST1A/B (SMG5/6)-like protein; contributes to environment-sensing adaptive gene expression responses; Esl1p and Esl2p contain a 14-3-3-like domain and a putative PilT N-terminus ribonuclease domain; ESL1 has a paralog, ESL2, that arose from the whole genome duplication
	CAGL0G02101g	-1.62581374762683	ECM4	Putative omega class glutathione transferase; gene is downregulated in azole-resistant strain	CR_02130W	ECM4	Cytoplasmic glutathione S-transferase; regulated by Nrg1, Tup1; induced in core stress response, in cyr1 or ras1 mutant (yeast or hyphal cells); Tn mutation affects filamentous growth; stationary phase enriched; Spider biofilm induced	YKR076W	ECM4	S-glutathionyl-(chloro)hydroquinone reductase (GS-HQR); glutathione transferase involved in cell-surface biosynthesis and architecture; catalyzes glutathione (GSH)-dependent reduction of GS-trichloro-p-hydroquinone to trichloro-p-hydroquinone; expression upregulated upon exposure to genotoxic agents, such as methyl methanesulfonate, cisplatin and bleomycin; not an essential gene; similar to YGR15…
	CAGL0F05709g	-1.57029709466553		Ortholog(s) have role in bipolar cellular bud site selection, cellular cation homeostasis and cytoplasm, nucleus localization	C4_07150W		bZIP transcription factor; possibly transcriptionally regulated upon hyphal formation; Hap43; F-12/CO2 early biofilm induced; Spider biofilm induced	YDR184C	ATC1	Nuclear protein; possibly involved in regulation of cation stress responses and/or in the establishment of bipolar budding pattern; relative distribution to the nucleus decreases upon DNA replication stress
	CAGL0H03971g	-1.54976963945856		Ortholog(s) have role in cellular response to oxidative stress, pathogenesis and membrane raft, mitochondrion, plasma membrane localization	CR_05380C	YCP4	Flavodoxin-like protein involved in oxidative stress protection and virulence; flow model, rat catheter and Spider biofilm repressed	YCR004C	YCP4	Protein of unknown function; has sequence and structural similarity to flavodoxins; predicted to be palmitoylated; the authentic, non-tagged protein is detected in highly purified mitochondria in high-throughput studies
	CAGL0D00660g	-1.53745197353433		Ortholog(s) have MAP-kinase scaffold activity and role in negative regulation of MAP kinase activity, osmosensory signaling pathway via Sho1 osmosensor	C3_05320W		Protein of unknown function; Hog1-repressed; Spider biofilm induced	YDL073W	YDL073W	Scaffold protein in the HKR1 sub-branch of the Hog1p-signaling pathway; physically interacts with the cytoplasmic domain of Hkr1p, and with Sho1p, Pbs2p, and Ste11p; prevents cross-talk signaling from Hkr1p of the osmotic stress MAPK cascade to the Kss1p MAPK cascade; non-essential gene
	CAGL0G08151g	-1.5256951353135		Ortholog(s) have 2 iron, 2 sulfur cluster binding, RNA polymerase II activating transcription factor binding, glutathione disulfide oxidoreductase activity	C4_02710C	GRX3	Putative glutaredoxin; flucytosine induced; regulated by Gcn4p; repressed in response to amino acid starvation (3-aminotriazole treatment)	YDR098C	GRX3	Glutathione-dependent oxidoreductase; hydroperoxide and superoxide-radical responsive; monothiol glutaredoxin subfamily member along with Grx4p and Grx5p; protects cells from oxidative damage; with Grx4p, binds to Aft1p in iron-replete conditions, promoting its dissociation from promoters; evidence exists indicating that the translation start site is not Met1 as currently annotated, but rather Me…
	CAGL0J04202g	-1.49683229124089	HSP12	Heat shock protein; gene is upregulated in azole-resistant strain; expression upregulated in biofilm vs planktonic cell culture	C5_02110W		Putative heat shock protein; decreased expression in hyphae; transcription is increased in populations of cells exposed to fluconazole over multiple generations; overexpression increases resistance to farnesol and azoles	YFL014W	HSP12	Plasma membrane protein involved in maintaining membrane organization; involved in maintaining organization during stress conditions; induced by heat shock, oxidative stress, osmostress, stationary phase, glucose depletion, oleate and alcohol; protein abundance increased in response to DNA replication stress and dietary restriction; regulated by the HOG and Ras-Pka pathways; required for dietary …
	CAGL0H04037g	-1.46441647552877		Ortholog(s) have heat shock protein binding, protein phosphatase regulator activity and role in glycogen metabolic process, meiotic nuclear division, mitotic spindle assembly checkpoint, response to heat	C7_00660W	GAC1	Putative regulatory subunit of ser/thr phosphoprotein phosphatase 1; fluconazole-induced; caspofungin repressed; transcript induced by Mnl1 under weak acid stress; regulated by Nrg1, Tup1; Spider and flow model biofilm induced	YOR178C	GAC1	Regulatory subunit for Glc7p type-1 protein phosphatase (PP1); tethers Glc7p to Gsy2p glycogen synthase, binds Hsf1p heat shock transcription factor, required for induction of some HSF-regulated genes under heat shock; GAC1 has a paralog, PIG1, that arose from the whole genome duplication
	CAGL0F03003g	-1.45826808448714		Ortholog(s) have osmosensor activity and role in (1->3)-beta-D-glucan biosynthetic process, cellular bud site selection, fungal-type cell wall organization, hyperosmotic response, osmosensory signaling pathway via Sho1 osmosensor				YDR420W	HKR1	Mucin family member that functions as an osmosensor in the HOG pathway; large, highly glycosylated protein that functions redundantly with Msb2p in Sho1p-mediated osmostresss induction of the HOG signaling pathway; cytoplasmic domain interacts with Ahk1p a scaffold protein that prevents cross talk with the Kss1p MAPK of the filamentous growth pathway; mutant displays defects in beta-1,3 glucan sy…
	CAGL0D06600g	-1.3715423921649		Ortholog(s) have protein serine/threonine kinase activity, protein tyrosine kinase activity and role in negative regulation of transcription from RNA polymerase III promoter, peptidyl-serine phosphorylation, protein autophosphorylation	C1_13470W	KNS1	Protein kinase involved in negative regulation of PolIII transcription; effector kinase of the TOR signaling pathway, phosphorylates Rpc53p to regulate ribosome and tRNA biosynthesis; Spider and flow model biofilm induced	YLL019C	KNS1	Protein kinase involved in negative regulation of PolIII transcription; effector kinase of the TOR signaling pathway and phosphorylates Rpc53p to regulate ribosome and tRNA biosynthesis; member of the LAMMER family of protein kinases, which are serine/threonine kinases also capable of phosphorylating tyrosine residues; capable of autophosphorylation
	CAGL0I07183g	-1.36675159534605		Ortholog(s) have RNA polymerase II core promoter proximal region sequence-specific DNA binding, RNA polymerase II repressing transcription factor binding and RNA polymerase II transcription factor activity, more	CR_05990C	SFL1	Transcription factor involved in negative regulation of morphogenesis, flocculation and virulence; induced in core caspofungin response; Spider biofilm induced	YOR140W	SFL1	Transcriptional repressor and activator; involved in repression of flocculation-related genes, and activation of stress responsive genes; has direct role in INO1 transcriptional memory; negatively regulated by cAMP-dependent protein kinase A subunit Tpk2p; premature stop codon (C1430T, Q477-stop) in SK1 background is linked to the aggressively invasive phenotype of SK1 relative to BY4741 (S288C)
	CAGL0M10439g	-1.35745282316783		Ortholog(s) have alpha,alpha-trehalase activity, calcium ion binding activity, role in ascospore formation, cellular response to desiccation, trehalose catabolic process involved in cellular response to stress and cytosol localization	CR_00560W	NTH1	Neutral trehalase; hyphal induction in mutant delayed but not reduced overall; not required for virulence in mice; possible regulatory cAMP-dependent phosphorylation at S10,S213; Hap43-repressed gene; Spider biofilm induced	YDR001C	NTH1	Neutral trehalase, degrades trehalose; required for thermotolerance and may mediate resistance to other cellular stresses; phosphorylated and activated by Cdc28p at the G1/S phase transition to coordinately regulate carbohydrate metabolism and the cell cycle; inhibited by Dcs1p; NTH1 has a paralog, NTH2, that arose from the whole genome duplication
	CAGL0F08217g	-1.3277130652816		Ortholog(s) have mRNA binding activity and cytoplasmic stress granule localization				YGR250C	YGR250C	Putative RNA binding protein; localizes to stress granules induced by glucose deprivation; interacts with Rbg1p in a two-hybrid assay; protein abundance increases in response to DNA replication stress
	CAGL0M04675g	-1.29254212990473		Ortholog(s) have thiosulfate sulfurtransferase activity and endoplasmic reticulum, mitochondrial outer membrane localization				YOR285W	RDL1	Thiosulfate sulfurtransferase; contains a rhodanese-like domain; localized to the mitochondrial outer membrane; protein abundance increases in response to DNA replication stress; similar to the human TSTD gene
	CAGL0M13651g	-1.26785852242602		Ortholog(s) have serine-type carboxypeptidase activity, role in phytochelatin biosynthetic process and endoplasmic reticulum, extracellular region, fungal-type vacuole localization	C7_03360W	CPY1	Carboxypeptidase Y; transcript regulated at yeast-hypha transition or macrophage response; induced human neutrophils; regulated by Gcn2 and Gcn4; putative N-glycosylation	YMR297W	PRC1	Vacuolar carboxypeptidase Y (proteinase C, CPY); broad-specificity C-terminal exopeptidase involved in non-specific protein degradation in the vacuole; member of the serine carboxypeptidase family
	CAGL0L09339g	-1.26418948968026	HAA1	Putative transcription factor, involved in regulation of response to acetic acid stress	C1_13640W	CUP2	Putative copper-binding transcription factor; required for normal resistance to copper; activates transcription of metallothionein genes; Hap43-repressed; Spider biofilm induced	YPR008W	HAA1	Transcriptional activator involved in adaptation to weak acid stress; activates transcription of TPO2, YRO2, and other genes encoding membrane stress proteins; HAA1 has a paralog, CUP2, that arose from the whole genome duplication; relocalizes from cytoplasm to nucleus upon DNA replication stress
	CAGL0F06545g	-1.26003255816952		Ortholog(s) have role in ascospore formation, cellular response to alkaline pH, cellular response to lithium ion, cellular response to neutral pH and cellular response to starvation, more	C6_00990W	RIM9	Protein required for alkaline pH response via the Rim101 signaling pathway; ortholog of S. cerevisiae Rim9 and A. nidulans palI; Spider biofilm induced	YMR063W	RIM9	Plasma membrane protein of unknown function; involved in the proteolytic activation of Rim101p in response to alkaline pH; interacts with Rim21p and Dfg16p to form a pH-sensing complex in the Rim101 pathway and is required to maintain Rim21p levels; has similarity to A. nidulans PalI;
	CAGL0E00803g	-1.20999224353021		Putative small cytosolic stress-induced chaperone; gene is upregulated in azole-resistant strain				YDR171W	HSP42	Small heat shock protein (sHSP) with chaperone activity; forms barrel-shaped oligomers that suppress unfolded protein aggregation; involved in cytoskeleton reorganization after heat shock; protein abundance increases and forms cytoplasmic foci in response to DNA replication stress
	CAGL0F07513g	-1.1906261449888		Ortholog(s) have role in aerobic respiration				YKL093W	MBR1	Protein involved in mitochondrial functions and stress response; overexpression suppresses growth defects of hap2, hap3, and hap4 mutants; MBR1 has a paralog, ISF1, that arose from the whole genome duplication
	CAGL0L05258g	-1.1139309342028		Ortholog(s) have sulfiredoxin activity, role in cellular protein localization, cellular response to oxidative stress and cytosol, nucleus localization	C2_05060C		Putative sulfiredoxin; regulated by Tsa1, Tsa1B in minimal media at 37 degrees C; flow model biofilm induced; Spider biofilm induced	YKL086W	SRX1	Sulfiredoxin; contributes to oxidative stress resistance by reducing cysteine-sulfinic acid groups in the peroxiredoxin Tsa1p, which is formed upon exposure to oxidants; conserved in higher eukaryotes; protein abundance increases in response to DNA replication stress
	CAGL0K06259g	-1.11295228321097	TSA1	Thiol-specific antioxidant protein; predicted thioredoxin peroxidase involved in oxidative stress response; protein abundance decreased in ace2 mutant cells				YDR453C	TSA2	Stress inducible cytoplasmic thioredoxin peroxidase; cooperates with Tsa1p in the removal of reactive oxygen, nitrogen and sulfur species using thioredoxin as hydrogen donor; deletion enhances the mutator phenotype of tsa1 mutants; protein abundance increases in response to DNA replication stress; TSA2 has a paralog, TSA1, that arose from the whole genome duplication
	CAGL0L10890g	-1.11212606700758		Ortholog(s) have role in cellular response to biotic stimulus, cellular response to starvation and chromosome organization, more	C1_09510W	YTM1	Protein similar to S. cerevisiae Ytm1p, which is involved in biogenesis of the large ribosomal subunit; transposon mutation affects filamentous growth; protein level decreases in stationary phase cultures; Hap43p-induced gene	YOR272W	YTM1	Constituent of 66S pre-ribosomal particles; forms a complex with Nop7p and Erb1p that is required for maturation of the large ribosomal subunit; has seven C-terminal WD repeats
	CAGL0F09075g	-1.05380615755593		Ortholog(s) have protein serine/threonine kinase activity	C2_03940C	SCH9	Protein kinase; involved in growth control, cell size, resistance to rapamycin, cations, chlamydospore formation, filamentous growth under some conditions, and virulence; prevents hyphal growth in hypoxia at high CO2; Spider biofilm induced	YHR205W	SCH9	AGC family protein kinase; functional ortholog of mammalian S6 kinase; phosphorylated by Tor1p and required for TORC1-mediated regulation of ribosome biogenesis, translation initiation, and entry into G0 phase; involved in transactivation of osmostress-responsive genes; regulates G1 progression, cAPK activity and nitrogen activation of the FGM pathway; integrates nutrient signals and stress signa…
	CAGL0K09900g	-1.04030140369281	HAP5	Ortholog(s) have DNA binding, RNA polymerase II core promoter proximal region sequence-specific DNA binding, transcription factor activity, sequence-specific DNA binding activity	C5_00940C	HAP5	Component of CCAAT-binding transcription factor; roles in filamentous growth, low-iron induction of FRP1; regulates genes involved in respiratory growth; functional homolog of S. cerevisiae Hap5p; Cap1p-dependent expression in low iron	YOR358W	HAP5	Subunit of the Hap2p/3p/4p/5p CCAAT-binding complex; complex is heme-activated and glucose repressed; complex is a transcriptional activator and global regulator of respiratory gene expression; required for assembly and DNA binding activity of the complex
	CAGL0L11110g	-1.00490746352909	CNA1	Catalytic subunit of calcineurin, calcium/calmodulin-dependent Ser/Thr-specific protein phosphatase; regulates stress-responding transcription factor Crz1p; involved in thermotolerance, response to ER stress, cell wall integrity, virulence	C1_00730C	CMP1	Catalytic subunit of calcineurin (Ca[2+]-calmodulin-regulated S/T protein phosphatase); required for wild-type virulence, resistance to high pH, Na(+), Li(+), Mn(2+), and fluconazole tolerance; micafungin is fungicidal to null mutant	YML057W	CMP2	Calcineurin A; one isoform (the other is Cna1p) of the catalytic subunit of calcineurin, a Ca++/calmodulin-regulated protein phosphatase which regulates Crz1p (a stress-response transcription factor), the other calcineurin subunit is CNB1; regulates the function of Aly1p alpha-arrestin; CMP2 has a paralog, CNA1, that arose from the whole genome duplication
	CAGL0I04048g	-1.00273688734617		Ortholog(s) have fructose 1,6-bisphosphate 1-phosphatase activity, role in carbon utilization, cellular response to glucose starvation, glycerol catabolic process and cytosol, nucleus localization
	CAGL0L06666g	-1.00029493140007	YHB1	Putative flavohemoglobin, involved in nitric oxide detoxification	CR_07790C	YHB1	Nitric oxide dioxygenase; acts in nitric oxide scavenging/detoxification; role in virulence in mouse; transcript activated by NO, macrophage interaction; Hap43, hypha repressed; mRNA binds She3	YGR234W	YHB1	Nitric oxide oxidoreductase; flavohemoglobin that plays role in oxidative and nitrosative stress responses; protects against nitration of cellular targets and against cell growth inhibition under aerobic or anaerobic conditions; yeast flavohemoglobin Yhb1p and human homolog neuroglobin NGB protect cells against alpha-synuclein cytotoxicity and aggregate formation; protein increases in abundance, …
	CAGL0G00946g	1.08533681359678		Has domain(s) with predicted thiol oxidase activity and role in oxidation-reduction process
	CAGL0F09097g	1.09453823780125	SKN7	Predicted transcription factor, involved in oxidative stress response; required for induction of TRX2, TRR1 and TSA1 transcription under oxidative stress	C5_00240W	SKN7	Putative homolog of S. cerevisiae Skn7p, which is predicted to be a response regulator protein in a phosphorelay signal transduction pathway; required for normal hydrogen peroxide resistance	YHR206W	SKN7	Nuclear response regulator and transcription factor; physically interacts with the Tup1-Cyc8 complex and recruits Tup1p to its targets; part of a branched two-component signaling system; required for optimal induction of heat-shock genes in response to oxidative stress; involved in osmoregulation; relocalizes to the cytosol in response to hypoxia; SKN7 has a paralog, HMS2, that arose from the who…
	CAGL0B03509g	1.10694212209907		Ortholog(s) have protein serine/threonine kinase activity	C2_07130C	RCK2	Predicted MAP kinase-activated protein kinase, similar to S. cerevisiae serine/threonine protein kinase Rck2p; induced by osmotic stress via Hog1p; macrophage/pseudohyphal-repressed; mutants are sensitive to rapamycin	YLR248W	RCK2	Protein kinase involved in response to oxidative and osmotic stress; identified as suppressor of S. pombe cell cycle checkpoint mutations; similar to CaM (calmodulin) kinases; RCK2 has a paralog, RCK1, that arose from the whole genome duplication
	CAGL0L10538g	1.11148781501821		Ortholog(s) have cytosol, nucleus localization	C5_05140W		Ortholog(s) have cytosol, nucleus localization	YHR063C	PAN5	2-dehydropantoate 2-reductase; part of the pantothenic acid pathway, structurally homologous to E. coli panE
	CAGL0E04114g	1.11571238378917		Ortholog(s) have role in cellular response to oxidative stress, misfolded or incompletely synthesized protein catabolic process, protein import into peroxisome matrix and mitochondrial inner membrane localization	C4_06430C		Ortholog(s) have role in cellular response to oxidative stress, misfolded or incompletely synthesized protein catabolic process, protein import into peroxisome matrix and mitochondrial inner membrane localization	YEL052W	AFG1	Protein that may act as a chaperone for cytochrome c oxidase subunits; conserved protein; may act as a chaperone in the degradation of misfolded or unassembled cytochrome c oxidase subunits; localized to matrix face of the mitochondrial inner membrane; member of the AAA family but lacks a protease domain
	CAGL0K08492g	1.14949847461296		Ortholog(s) have aspartic endopeptidase activity, intramembrane cleaving activity and role in cellular response to starvation, proteolysis involved in cellular protein catabolic process				YKL100C	YPF1	Intramembrane aspartyl protease of the perinuclear ER membrane; acts in a branch of ER-associated degradation (ERAD) that degrades functional proteins rather than misfolded proteins; regulates abundance of high-affinity plasma membrane transporters, such as Ctr1p and Zrt1p, during the starvation response; has a presenilin fold; member of the GxGD family of intramembrane proteases; closest human h…
	CAGL0C02321g	1.18187737489927	PHM8	Ortholog(s) have lysophosphatidic acid phosphatase activity, nucleotidase activity and role in cellular response to phosphate starvation, nucleotide catabolic process, response to carbon starvation, triglyceride homeostasis				YER037W	PHM8	Lysophosphatidic acid (LPA) phosphatase, nucleotidase; principle and physiological nucleotidase working on GMP, UMP and CMP; involved in LPA hydrolysis in response to phosphate starvation and ribose salvage pathway; phosphatase activity is soluble and Mg2+ dependent; expression is induced by low phosphate levels and by inactivation of Pho85p; repressed by Gcn4p under normal conditions; PHM8 has a…
	CAGL0M11704g	1.23931434133212	AHP1	Putative thiol-specific peroxiredoxin; alkyl hydroperoxide reductase; protein differentially expressed in azole resistant strain; expression upregulated in biofilm vs planktonic cell culture; protein abundance decreased in ace2 mutant cells	C4_02410C	AHP1	Alkyl hydroperoxide reductase; immunogenic; fluconazole-induced; amphotericin B, caspofungin, alkaline repressed; core stress response induced; Ssk1/Nrg1/Tup1/Ssn6/Hog1 regulated; flow model biofilm induced; rat catheter biofilm repressed	YLR109W	AHP1	Thiol-specific peroxiredoxin; reduces hydroperoxides to protect against oxidative damage; function in vivo requires covalent conjugation to Urm1p
	CAGL0A03784g	1.24891173105336		Ortholog(s) have protein channel activity and role in apoptotic process, cellular response to oxidative stress, protein import into mitochondrial inner membrane, response to arsenic-containing substance, response to osmotic stress	C5_05280C	SDH4	Succinate dehydrogenase, membrane subunit; induced in high iron	YOR297C	TIM18	Component of the mitochondrial TIM22 complex; involved in insertion of polytopic proteins into the inner membrane; may mediate assembly or stability of the complex
	CAGL0L11990g	1.25751405713217		Ortholog(s) have RNA polymerase II activating transcription factor binding, disulfide oxidoreductase activity				YER174C	GRX4	Glutathione-dependent oxidoreductase; hydroperoxide and superoxide-radical responsive; monothiol glutaredoxin subfamily member along with Grx3p and Grx5p; protects cells from oxidative damage; with Grx3p, binds to Aft1p in iron-replete conditions, promoting its dissociation from promoters; mutant has increased aneuploidy tolerance; transcription regulated by Yap5p; GRX4 has a paralog, GRX3, that …
	CAGL0L00495g	1.26076762114484	HSC82	Putative heat shock protein	C7_02030W	HSP90	Essential chaperone, regulates several signal transduction pathways and temperature-induced morphogenesis; activated by heat shock, stress; localizes to surface of hyphae, not yeast cells; mediates echinocandin and biofilm azole resistance	YMR186W	HSC82	Cytoplasmic chaperone of the Hsp90 family; plays a role in determining prion variants; redundant in function and nearly identical with Hsp82p, and together they are essential; expressed constitutively at 10-fold higher basal levels than HSP82 and induced 2-3 fold by heat shock; contains two acid-rich unstructured regions that promote the solubility of chaperone-substrate complexes; HSC82 has a pa…
	CAGL0I08855g	1.26896227056989		Ortholog(s) have Rab guanyl-nucleotide exchange factor activity, role in intra-Golgi vesicle-mediated transport, protein complex assembly and TRAPPII protein complex, trans-Golgi network localization	C1_05320C		Ortholog(s) have Rab guanyl-nucleotide exchange factor activity, role in intra-Golgi vesicle-mediated transport, protein complex assembly and TRAPPII protein complex, trans-Golgi network localization	YGR166W	TRS65	Component of transport protein particle (TRAPP) complex II; TRAPPII is a multimeric guanine nucleotide-exchange factor for the GTPase Ypt1p, regulating intra-Golgi and endosome-Golgi traffic; role in cell wall beta-glucan biosynthesis and the stress response
	CAGL0H01199g	1.32880773328243		Ortholog(s) have eukaryotic translation initiation factor 2alpha kinase activity, tRNA binding activity	C7_01330C	GCN2	Translation initiation factor 2-alpha (eIF2alpha) kinase; has nonessential role in amino acid starvation response, in contrast to S. cerevisiae homolog; similar to S. cerevisiae Gcn2p	YDR283C	GCN2	Protein kinase; phosphorylates the alpha-subunit of translation initiation factor eIF2 (Sui2p) in response to starvation; activated by uncharged tRNAs and the Gcn1p-Gcn20p complex; contributes to DNA damage checkpoint control
	CAGL0L07304g	1.4911596213114	GET3	Ortholog(s) have ATPase activity, guanyl-nucleotide exchange factor activity, unfolded protein binding activity	C1_02760W		Putative guanyl-nucleotide exchange factor; Spider biofilm repressed	YDL100C	GET3	Guanine nucleotide exchange factor for Gpa1p; amplifies G protein signaling; functions as a chaperone under ATP-depleted oxidative stress conditions; subunit of GET complex, involved in ATP dependent Golgi to ER trafficking and insertion of tail-anchored (TA) proteins into ER membrane under non-stress conditions; binds as dimer to transmembrane domain (TMD) cargo, shielding TMDs from aqueous solv…
	CAGL0A02530g	1.53449280723124		Thioredoxin reductase	C5_02710W	TRR1	Thioredoxin reductase; regulated by Tsa1/Tsa1B, Hap43; induced by nitric oxide, peroxide; oxidative stress-induce via Cap1; induced by human neutrophils; stationary phase enriched protein	YDR353W	TRR1	Cytoplasmic thioredoxin reductase; key regulatory enzyme that determines the redox state of the thioredoxin system, which acts as a disulfide reductase system and protects cells against both oxidative and reductive stress; protein abundance increases in response to DNA replication stress; TRR1 has a paralog, TRR2, that arose from the whole genome duplication
	CAGL0G01925g	1.56582880376081		Ortholog(s) have role in hyperosmotic response, response to antibiotic, response to salt stress and mitochondrion localization	C1_05160C		Putative phosphatidyl synthase; stationary phase enriched protein; transcript repressed by yeast-hypha switch; Hap43-repressed; rat catheter, Spider and flow model biofilm induced	YKR070W	YKR070W	Putative protein of unknown function; the authentic, non-tagged protein is detected in highly purified mitochondria in high-throughput studies
	CAGL0L03157g	1.64546001845417		Ortholog(s) have RNA polymerase II transcription factor activity, sequence-specific DNA binding, sequence-specific DNA binding activity				YKR034W	DAL80	Negative regulator of genes in multiple nitrogen degradation pathways; expression is regulated by nitrogen levels and by Gln3p; member of the GATA-binding family, forms homodimers and heterodimers with Gzf3p; DAL80 has a paralog, GZF3, that arose from the whole genome duplication
	CAGL0K01265g	1.71664880013701		Ortholog(s) have role in cellular response to biotic stimulus, cellular response to starvation and filamentous growth of a population of unicellular organisms in response to biotic stimulus, more	C1_11130W	FGR16	Protein lacking an ortholog in S. cerevisiae; transposon mutation affects filamentous growth; fluconazole-downregulated	YGR075C	PRP38	Unique component of the U4/U6.U5 tri-snRNP particle; tri-snRNP is required for conformational changes which result in the catalytic activation of the spliceosome; dispensable for spliceosome assembly
	CAGL0H06523g	2.01284928501794		Ortholog(s) have pantoate-beta-alanine ligase activity, role in pantothenate biosynthetic process and cytosol, nucleus localization	CR_02580W	PAN6	Ortholog(s) have pantoate-beta-alanine ligase activity, role in pantothenate biosynthetic process and cytosol, nucleus localization	YIL145C	PAN6	Pantothenate synthase; also known as pantoate-beta-alanine ligase, required for pantothenic acid biosynthesis, deletion causes pantothenic acid auxotrophy, homologous to E. coli panC
	CAGL0K05137g	2.07316422295874		Ortholog(s) have alpha,alpha-trehalase activity and role in cellular response to desiccation, cellular response to ethanol, cellular response to freezing, pathogenesis, trehalose catabolic process	C1_06940C	ATC1	Cell wall acid trehalase; catalyzes hydrolysis of the disaccharide trehalose; similar to S. cerevisiae vacuolar acid trehalase (Ath1p); Hap43p-repressed gene	YPR026W	ATH1	Acid trehalase required for utilization of extracellular trehalose; involved in intracellular trehalose degradation during growth recovery after saline stress
	CAGL0F03553g	2.11811147019201	DAP1	Putative heme-binding protein involved in regulation of cytochrome P450, Erg11p; required for growth under iron starvation	CR_04060C	DAP1	Similar to mammalian membrane-associated progesterone receptors involved in DNA damage response; induced in core stress response; Hog1 regulated; clade-associated expression; Hap43-repressed	YPL170W	DAP1	Heme-binding protein; involved in regulation of cytochrome P450 protein Erg11p; damage response protein, related to mammalian membrane progesterone receptors; mutations lead to defects in telomeres, mitochondria, and sterol synthesis
	CAGL0G03795g	2.14502062700479	SSA1	Heat shock protein of the HSP70 family	C1_04300C	SSA2	HSP70 family chaperone; cell wall fractions; antigenic; beta-defensin peptides impport; ATPase domain binds histatin 5; at hyphal surface, not yeast; farnesol-repressed in biofilm; flow model, Spider biofilm repressed; caspofungin repressed	YLL024C	SSA2	HSP70 family ATP-binding protein; involved in protein folding, vacuolar import of proteins; required for ubiquitin-dependent degradation of short-lived proteins; associated with chaperonin-containing T-complex; 98% identical to paralog Ssa1p with distinct functional specificity in propagation of yeast [URE3] prions and vacuolar-mediated degradation of gluconeogenesis enzymes; binds tRNA, has role…
	CAGL0L01551g	2.19937081935591		Ortholog(s) have role in ascospore formation, cellular response to biotic stimulus, cellular response to chemical stimulus, cellular response to glucose starvation and cellular response to neutral pH, more	C6_01720C	SUR7	Protein required for normal cell wall, plasma membrane, cytoskeletal organization, endocytosis; localizes to eisosome subdomains of plasma membrane; four transmembrane motifs; mutant shows ectopic, chitin-rich cell wall; fluconazole-induced	YML052W	SUR7	Plasma membrane protein, component of eisosomes; long-lived protein that remains stable in eisosomes of mother cells while other eisosome proteins, Pil1p and Lsp1p, turn over; may function to anchor the eisosome in place; sporulation and plasma membrane sphingolipid content are altered in mutants; localizes to furrow-like invaginations (MCC patches)
	CAGL0M07293g	2.87444296073841		Putative ABC transporter of weak organic acids; gene is downregulated in azole-resistant strain				YPL058C	PDR12	Plasma membrane ATP-binding cassette (ABC) transporter; weak-acid-inducible multidrug transporter required for weak organic acid resistance; induced by sorbate and benzoate and regulated by War1p; mutants exhibit sorbate hypersensitivity
Cytoskeleton organization	CAGL0A02145g	-1.71358858033981		Ortholog(s) have actin filament binding activity, role in actin cortical patch localization, actin filament bundle assembly, endocytosis and actin cortical patch, cytosol localization	C2_04850C		Ortholog(s) have actin filament binding activity, role in actin cortical patch localization, actin filament bundle assembly, endocytosis and actin cortical patch, cytosol localization	YHR016C	YSC84	Actin-binding protein; involved in bundling of actin filaments and endocytosis of actin cortical patches; activity stimulated by Las17p; contains SH3 domain similar to Rvs167p; YSC84 has a paralog, LSB3, that arose from the whole genome duplication
	CAGL0J00803g	-1.31060166907873		Ortholog(s) have structural constituent of cytoskeleton activity	CR_05920C	MHP1	Protein similar to S. cerevisiae Mhp1p, which is involved in microtubule stabilization; transposon mutation affects filamentous growth; possibly transcriptionally regulated upon hyphal formation; possibly an essential gene (by UAU1 method)	YJL042W	MHP1	Microtubule-associated protein involved in microtubule organization; involved in assembly and stabilization of microtubules; overproduction results in cell cycle arrest at G2 phase; similar to Drosophila protein MAP and to mammalian MAP4 proteins
	CAGL0F03091g	-1.30601742417182		Ortholog(s) have ATP-dependent microtubule motor activity, plus-end-directed activity	C2_01440C		Ortholog(s) have ATP-dependent microtubule motor activity, plus-end-directed activity	YDR424C	DYN2	Cytoplasmic light chain dynein, microtubule motor protein; required for intracellular transport and cell division; involved in mitotic spindle positioning; forms complex with dynein intermediate chain Pac11p that promotes Dyn1p homodimerization, potentiates motor processivity; Dyn2p-Pac11p complex important for interaction of dynein motor complex with dynactin complex; acts as molecular glue to d…
	CAGL0D06512g	-1.19630133681253		Putative membrane bound guanine nucleotide exchange factor; gene is upregulated in azole-resistant strain
	CAGL0K07095g	-1.07763962362853		Ortholog(s) have ubiquitin binding activity	CR_06180W	ARC40	Protein similar to S. cerevisiae Arc40; involved in actin filament organization in S. cerevisiae; transposon mutation affects filamentous growth; rat catheter and Spider biofilm repressed	YBR234C	ARC40	Subunit of the ARP2/3 complex; ARP2/3 is required for the motility and integrity of cortical actin patches
	CAGL0J07172g	-1.06689009506108		Ortholog(s) have actin filament binding, protein binding, bridging activity and role in actin crosslink formation, chronological cell aging, mitotic cytokinesis	C2_06370C	SCP1	Putative cortical actin cytoskeleton protein; constitutive expression independent of MTL or white-opaque status	YOR367W	SCP1	Component of yeast cortical actin cytoskeleton; binds and cross links actin filaments; originally identified by its homology to calponin (contains a calponin-like repeat) but the Scp1p domain structure is more similar to transgelin
	CAGL0J05742g	1.20078994937008		Ortholog(s) have alpha-tubulin binding, microtubule binding activity, role in cytoplasmic microtubule organization, post-chaperonin tubulin folding pathway and cytosol, nucleus localization	CR_02690W		Ortholog(s) have alpha-tubulin binding, microtubule binding activity, role in cytoplasmic microtubule organization, establishment or maintenance of cell polarity, post-chaperonin tubulin folding pathway and cytosol, nucleus localization	YNL148C	ALF1	Alpha-tubulin folding protein; similar to mammalian cofactor B; Alf1p-GFP localizes to cytoplasmic microtubules; required for the folding of alpha-tubulin and may play an additional role in microtubule maintenance
	CAGL0L04136g	1.29063221920664		Ortholog(s) have structural constituent of cytoskeleton activity	CR_01990C	SPC98	Putative component of the microtubule-nucleating Tub4p (gamma-tubulin) complex; periodic mRNA expression, peak at cell-cycle S/G2 phase	YNL126W	SPC98	Component of the microtubule-nucleating Tub4p (gamma-tubulin) complex; interacts with Spc110p at the spindle pole body (SPB) inner plaque and with Spc72p at the SPB outer plaque
	CAGL0C02849g	1.31807802265102		Ortholog(s) have beta-tubulin binding activity, role in tubulin complex assembly and cytoplasm localization	CR_04650W		Protein involved in microtubule morphogenesis; required for protection from excess free beta-tubulin; possibly involved the beta-tubulin folding; Spider biofilm repressed	YOR265W	RBL2	Protein involved in microtubule morphogenesis; required for protection from excess free beta-tubulin; proposed to be involved the folding of beta-tubulin; similar to mouse beta-tubulin cofactor A; protein abundance increases in response to DNA replication stress
	CAGL0I02464g	1.58921426353007		Putative component of microtubule-nucleating complex; gene is upregulated in azole-resistant strain	CR_06740W		Ortholog(s) have structural constituent of cytoskeleton activity	YHR172W	SPC97	Component of the microtubule-nucleating Tub4p (gamma-tubulin) complex; interacts with Spc110p at the spindle pole body (SPB) inner plaque and with Spc72p at the SPB outer plaque
	CAGL0F00671g	1.71949700386721		Ortholog(s) have actin filament binding, calmodulin binding, microfilament motor activity	C1_13780W	MYO2	Class V myosin; nonessential; sole class V myosin in C. albicans; required for WT actin cytoskeletal polarity, nuclear organization, migration, hyphal growth; conserved myosin ATPase/tail domains; Hap43-induced; flow model biofilm repressed	YOR326W	MYO2	Type V myosin motor involved in actin-based transport of cargos; required for the polarized delivery of secretory vesicles, the vacuole, late Golgi elements, peroxisomes, and the mitotic spindle; MYO2 has a paralog, MYO4, that arose from the whole genome duplication
	CAGL0K12650g	1.85747527063767	TUB2	Beta-tubulin; protein abundance decreased in ace2 mutant cells	C1_00710C	TUB2	Beta-tubulin; functional homolog of ScTub2; overproduction makes S. cerevisiae inviable; has two introns; GlcNAc, hypha fluconazole-induced; slow growth, ectopic expression increases white-to opaque switch; rat catheter biofilm repressed	YFL037W	TUB2	Beta-tubulin; associates with alpha-tubulin (Tub1p and Tub3p) to form tubulin dimer, which polymerizes to form microtubules; mutation in human ortholog is associated with congenital fibrosis of the extraocular muscles (CFEOM) with polymicrogyria
	CAGL0H09438g	2.40709024392504		Ortholog(s) have ATPase activator activity, cytoskeletal adaptor activity, microtubule plus-end binding, protein homodimerization activity, structural constituent of cytoskeleton activity	C1_11250W		Microtubule-binding protein of the cortical microtubule; delays exit from mitosis when the spindle is abnormally oriented; Spider biofilm repressed	YER016W	BIM1	Microtubule plus end-tracking protein; together with Kar9p makes up the cortical microtubule capture site and delays the exit from mitosis when the spindle is oriented abnormally; homolog of human end binding protein 1 (EB1)
	CAGL0G02387g	3.82337994660708		Ortholog(s) have Rho GDP-dissociation inhibitor activity and role in maintenance of cell polarity, regulation of Rho protein signal transduction	C6_02090C		S. cerevisiae ortholog Pxl1 localizes to sites of polarized growth and is required for selection and/or maintenance of polarized growth sites; Hog1p-repressed	YKR090W	PXL1	Protein that localizes to sites of polarized growth; required for selection and/or maintenance of polarized growth sites, may modulate signaling by the GTPases Cdc42p and Rho1p; contains LIM domains and has similarity to metazoan paxillin; relocalizes from bud neck to cytoplasm upon DNA replication stress
Cell wall organization	CAGL0G05984g	-2.4284908690557		Ortholog(s) have role in ascospore wall assembly				YHR139C	SPS100	Protein required for spore wall maturation; expressed during sporulation; may be a component of the spore wall; expression also induced in cells treated with the mycotoxin patulin; SPS100 has a paralog, YGP1, that arose from the whole genome duplication
	CAGL0I07249g	-2.13772974350001		Putative GTPase-activating protein involved in cell wall and cytoskeleton homeostasis; gene is upregulated in azole-resistant strain				YOR134W	BAG7	Rho GTPase activating protein (RhoGAP); stimulates the intrinsic GTPase activity of Rho1p, which plays a bud growth by regulating actin cytoskeleton organization and cell wall biosynthesis, resulting in the downregulation of Rho1p; structurally and functionally related to Sac7p; BAG7 has a paralog, SAC7, that arose from the whole genome duplication
	CAGL0F00891g	-2.11910445373268		Ortholog(s) have role in ascospore wall assembly and ascospore wall, ascus lipid particle, cytoplasm, prospore membrane localization				YOL047C	LDS2	Protein Involved in spore wall assembly; localizes to lipid droplets found on or outside of the prospore membrane; shares similarity with Lds1p and Rrt8p, and a strain mutant for all 3 genes exhibits reduced dityrosine fluorescence relative to the single mutants; green fluorescent protein (GFP)-fusion protein localizes to the cytoplasm in a punctate pattern
	CAGL0C03872g	-2.10649440452375	TIR3	Putative GPI-linked cell wall protein involved in sterol uptake				YIL011W	TIR3	Cell wall mannoprotein; member of Srp1p/Tip1p family of serine-alanine-rich proteins; expressed under anaerobic conditions and required for anaerobic growth; TIR3 has a paralog, TIR2, that arose from the whole genome duplication
	CAGL0F03883g	-2.08118221694821	GAS4	Putative glycoside hydrolase of the Gas/Phr family; predicted GPI-anchor				YMR215W	GAS3	Putative 1,3-beta-glucanosyltransferase; has similarity go other GAS family members; low abundance, possibly inactive member of the GAS family of GPI-containing proteins; localizes to the cell wall; mRNA induced during sporulation
	CAGL0K05247g	-2.04699414866645		Ortholog(s) have ubiquitin protein ligase binding activity, role in fungal-type cell wall organization, regulation of transcription from RNA polymerase II promoter and cytosol, nucleus localization				YPR030W	CSR2	Nuclear ubiquitin protein ligase binding protein; may regulate utilization of nonfermentable carbon sources and endocytosis of plasma membrane proteins; overproduction suppresses chs5 spa2 lethality at high temp; ubiquitinated by Rsp5p, deubiquitinated by Ubp2p; CSR2 has a paralog, ECM21, that arose from the whole genome duplication
	CAGL0H10120g	-1.80834653196511		Ortholog(s) have glucan endo-1,6-beta-glucosidase activity and role in fungal-type cell wall beta-glucan metabolic process, fungal-type cell wall disassembly involved in conjugation with cellular fusion	C1_14060W		Glucan 1,3-beta-glucosidase; regulated by Nrg1, Tup1 and possibly Tac1; induced by NO and during cell wall regeneration; stationary phase enriched; possibly essential (UAU1 method); F-12/CO2 early biofilm induced; flow biofilm repressed	YBR056W	YBR056W	Putative glycoside hydrolase of the mitochondrial intermembrane space
	CAGL0F00869g	-1.72145130156897		Ortholog(s) have role in ascospore wall assembly and ascospore wall, lipid particle, prospore membrane localization	CR_08380C		Protein of unknown function; decreased transcription is observed in an azole-resistant strain that overexpresses MDR1	YOL048C	RRT8	Protein involved in spore wall assembly; shares similarity with Lds1p and Lds2p and a strain mutant for all 3 genes exhibits reduced dityrosine fluorescence relative to the single mutants; identified in a screen for mutants with increased levels of rDNA transcription; green fluorescent protein (GFP)-fusion protein localizes to lipid particles; protein abundance increases in response to DNA replic…
	CAGL0B02882g	-1.66649015744415	BMT2	Beta mannosyltransferase; transmembrane domain protein similar to C. albicans WRY family; gene is downregulated in azole-resistant strain
	CAGL0H09614g	-1.6470678295455		Putative GPI-linked cell wall protein				YER011W	TIR1	Cell wall mannoprotein; expression is downregulated at acidic pH and induced by cold shock and anaerobiosis; abundance is increased in cells cultured without shaking; member of the Srp1p/Tip1p family of serine-alanine-rich proteins
	CAGL0I10516g	-1.56652690608562		Ortholog(s) have role in fungal-type cell wall organization, pathogenesis and cytoplasm, eisosome, integral component of plasma membrane, membrane raft localization	C3_07310C	SLK19	Alkaline-induced protein of plasma membrane; affects cell aggregation, cell wall; similar to S. cerevisiae Slk19p (a kinetochore protein with roles in mitosis, meiosis); required for wild-type virulence in mouse; macrophage-downregulated	YGR130C	YGR130C	Component of the eisosome with unknown function; GFP-fusion protein localizes to the cytoplasm; specifically phosphorylated in vitro by mammalian diphosphoinositol pentakisphosphate (IP7)
	CAGL0J06050g	-1.54393046391714		Ortholog(s) have role in cell wall assembly and extracellular region localization				YNL160W	YGP1	Cell wall-related secretory glycoprotein; induced by nutrient deprivation-associated growth arrest and upon entry into stationary phase; may be involved in adaptation prior to stationary phase entry; YGP1 has a paralog, SPS100, that arose from the whole genome duplication
	CAGL0H09592g	-1.51461410946931		Putative GPI-linked cell wall protein
	CAGL0K12980g	-1.48360421690155	BMT7	Beta mannosyltransferase
	CAGL0F07579g	-1.3701435791406	CWP1.2	Putative GPI-linked cell wall protein				YKL096W	CWP1	Cell wall mannoprotein that localizes to birth scars of daughter cells; linked to a beta-1,3- and beta-1,6-glucan heteropolymer through a phosphodiester bond; required for propionic acid resistance
	CAGL0B02948g	-1.34826061077687	BMT4	Beta mannosyltransferase
	CAGL0E02255g	-1.33579451568817		Ortholog(s) have role in fungal-type cell wall organization and extrinsic component of plasma membrane, mitochondrial outer membrane localization				YOL109W	ZEO1	Peripheral membrane protein of the plasma membrane; interacts with Mid2p; regulates the cell integrity pathway mediated by Pkc1p and Slt2p; the authentic protein is detected in a phosphorylated state in highly purified mitochondria
	CAGL0F01859g	-1.29664186486439		Ortholog(s) have role in ascospore wall assembly and cytoplasm, prospore membrane localization				YLR054C	OSW2	Protein of unknown function reputedly involved in spore wall assembly
	CAGL0D00286g	-1.27989693282127	BMT1	Beta mannosyltransferase
	CAGL0J11462g	-1.1755019753622		?? Apaguei e guardei sem querer!!!	C5_00270W	PGA14	Putative GPI-anchored protein; induced during cell wall regeneration; regulated by Ssn6p	YNL190W	YNL190W	Hydrophilin essential in desiccation-rehydration process; cell wall protein; contains a putative GPI-attachment site
	CAGL0G08602g	-1.1304704139168		Ortholog(s) have GTPase regulator activity, role in Ras protein signal transduction, fungal-type cell wall biogenesis, positive regulation of transcription from RNA polymerase II promoter and nucleus localization				YIL119C	RPI1	Transcription factor, allelic differences between S288C and Sigma1278b; mediates fermentation stress tolerance by modulating cell wall integrity; overexpression suppresses heat shock sensitivity of wild-type RAS2 overexpression and also suppresses cell lysis defect of mpk1 mutation; allele from S288c can confer fMAPK pathway independent transcription of FLO11; S288C and Sigma1278b alleles differ …
	CAGL0G06072g	-1.11591600988049		Ortholog(s) have endoplasmic reticulum, fungal-type vacuole localization	C3_03030C	ECM14	Ortholog(s) have endoplasmic reticulum, fungal-type vacuole localization	YHR132C	ECM14	Putative metalloprotease with similarity to zinc carboxypeptidases; required for normal cell wall assembly
	CAGL0D01276g	-1.07425259201139		Ortholog(s) have role in establishment of protein localization to plasma membrane, fungal-type cell wall biogenesis, mitotic cell cycle G1 arrest in response to pheromone and osmosensory signaling pathway, more	C1_08310W	OPY2	Predicted transmembrane protein; role in cell wall biogenesis; required for Cek1 phosphorylation; Spider biofilm induced	YPR075C	OPY2	Integral membrane protein that acts as a membrane anchor for Ste50p; involved in the signaling branch of the high-osmolarity glycerol (HOG) pathway and as a regulator of the filamentous growth pathway; overproduction blocks cell cycle arrest in the presence of mating pheromone; relocalizes from vacuole to plasma membrane upon DNA replication stress
	CAGL0K12408g	1.0039656579656		Ortholog(s) have phosphatidylinositol deacylase activity	C1_04190C	BST1	Inositol deacylase involved in attachment of GPI-anchored proteins to cell wall; required for host invasion and immune escape	YFL025C	BST1	GPI inositol deacylase of the endoplasmic reticulum (ER); negatively regulates COPII vesicle formation; prevents production of vesicles with defective subunits; required for proper discrimination between resident ER proteins and Golgi-bound cargo molecules; functional ortholog of human PGAP1, mutation of which is associated with intellectual disability and encephalopathy
	CAGL0G00220g	1.09216049864001		Ortholog(s) have 1,3-beta-glucanosyltransferase activity, glucan endo-1,3-beta-D-glucosidase activity	C4_02250C	BGL2	Cell wall 1,3-beta-glucosyltransferase; mutant has cell-wall and growth defects, but wild-type 1,3- or 1,6-beta-glucan content; antigenic; virulence role in mouse systemic infection; rat catheter biofilm induced	YGR282C	BGL2	Endo-beta-1,3-glucanase; major protein of the cell wall, involved in cell wall maintenance; involved in incorporation of newly synthesized mannoprotein molecules into the cell wall
	CAGL0B03905g	1.0960042527466		Ortholog(s) have mannosyltransferase activity, role in GPI anchor biosynthetic process, fungal-type cell wall organization, hyphal growth and glycosylphosphatidylinositol-mannosyltransferase I complex localization	C4_02100C	GPI14	Catalytic subunit of glycosylphosphatidylinositol-alpha 1,4 mannosyltransferase I, involved in GPI anchor biosynthesis; regulated by Tsa1p, Tsa1Bp under H2O2 stress conditions	YJR013W	GPI14	Glycosylphosphatidylinositol-alpha 1,4 mannosyltransferase I; involved in GPI anchor biosynthesis, requires Pbn1p for function; homolog of mammalian PIG-M
	CAGL0F01463g	1.12221284302969	TIR1	Putative GPI-linked cell wall mannoprotein of the Srp1p/Tip1p family				YOR010C	TIR2	Putative cell wall mannoprotein; member of the Srp1p/Tip1p family of serine-alanine-rich proteins; transcription is induced by cold shock and anaerobiosis; TIR2 has a paralog, TIR3, that arose from the whole genome duplication
	CAGL0F01287g	1.16050128625682	GAS5	Putative transglycosidase with a predicted role in the elongation of 1,3-beta-glucan	C5_05390C	PGA4	GPI-anchored cell surface protein; beta-1,3-glucanosyltransferase with similarity to the A. fumigatus GEL family; transcript induced in RHE model of oral candidiasis; fluconazol-induced	YOL030W	GAS5	1,3-beta-glucanosyltransferase; has similarity to Gas1p; localizes to the cell wall
	CAGL0E05412g	1.18019570129626		Ortholog(s) have UDP-glucose:glycoprotein glucosyltransferase activity	C3_02960C	KRE5	UDP-glucose:glycoprotein glucosyltransferase; 1,6-beta-D-glucan biosynthesis, hyphal growth, virulence in mouse IV model; partially complements S. cerevisiae kre5 mutant defects; flow biofilm repressed, Bcr1-repressed in RPMI a/a biofilms	YOR336W	KRE5	Protein required for beta-1,6 glucan biosynthesis; mutations result in aberrant morphology and severe growth defects
	CAGL0C05577g	1.19392200334493		Ortholog(s) have role in ascospore wall assembly, ascospore-type prospore membrane assembly, mitochondrion inheritance and prospore membrane leading edge, spindle pole body localization				YDL239C	ADY3	Protein required for spore wall formation; subunit of the leading edge protein (LEP) complex (Ssp1-Ady3-Don1-Irc10) that forms a ring-like structure at the leading edge of the prospore membrane during meiosis II; mediates assembly of the LEP complex, formation of the ring-like structure via interaction with spindle pole body components and prospore membrane maturation; potentially phosphorylated …
	CAGL0L12232g	1.35448191452692		Ortholog(s) have role in attachment of GPI anchor to protein and GPI-anchor transamidase complex localization	C5_00040C		Subunit of the GPI (glycosylphosphatidylinositol):protein transamidase complex; removes the GPI-anchor signal and attaches GPI to proteins in the ER; Spider biofilm repressed	YLR088W	GAA1	Subunit of the GPI:protein transamidase complex; removes the GPI-anchoring signal and attaches GPI (glycosylphosphatidylinositol) to proteins in the ER; human homolog GPAA1 can complement growth defects of yeast thermosensitive mutant at restrictive temperature
	CAGL0L07370g	1.36154860762885		Ortholog(s) have UDP-N-acetylglucosamine diphosphorylase activity, role in UDP-N-acetylglucosamine biosynthetic process and cytosol, nucleus localization	C5_02530W	UAP1	UDP-N-acetylglucosamine pyrophosphorylase, catalyzes biosynthesis of UDP-N-acetylglucosamine from UTP and N-acetylglucosamine 1-phosphate; functional homolog of S. cerevisiae Qri1p; alkaline upregulated	YDL103C	QRI1	UDP-N-acetylglucosamine pyrophosphorylase; catalyzes the formation of UDP-N-acetylglucosamine (UDP-GlcNAc), which is important in cell wall biosynthesis, protein N-glycosylation, and GPI anchor biosynthesis; protein abundance increases in response to DNA replication stress
	CAGL0C02101g	1.41190160633075		Ortholog(s) have role in (1->6)-beta-D-glucan biosynthetic process, chromosome organization and integral component of endoplasmic reticulum membrane localization	CR_05140W		Integral membrane protein of the ER; role in the synthesis of beta-1,6-glucan in the cell wall; S. cerevisiae ortholog required for cell viability; Spider biofilm induced	YFR042W	KEG1	Integral membrane protein of the ER; physically interacts with Kre6p; has a role in the synthesis of beta-1,6-glucan in the cell wall; required for cell viability
	CAGL0A04411g	1.41822665286383	SKT5	Ortholog(s) have enzyme activator activity and role in barrier septum assembly, cellular protein localization, fungal-type cell wall chitin biosynthetic process, regulation of fungal-type cell wall beta-glucan biosynthetic process	C3_05700W	CHS4	Activator of Chs3p chitin synthase; required for wild-type wall chitin content, but not for hyphal growth; mutant resistant to Calcofluor white; prenylation and 2 transmembrane segments predicted; functional homolog of S. cerevisiae Chs4p	YBL061C	SKT5	Activator of Chs3p (chitin synthase III) during vegetative growth; recruits Chs3p to the bud neck via interaction with Bni4p; SKT5 has a paralog, SHC1, that arose from the whole genome duplication
	CAGL0I04818g	1.4595598037469		Ortholog(s) have chitin synthase activity	C7_02770W	CHS1	Chitin synthase; essential; for primary septum synthesis in yeast and hyphae; 1 of several chitin synthases; enzymatically activated by proteolytic processing; complements defects of S. cerevisiae chs1 or chs2; Spider biofilm repressed	YBR038W	CHS2	Chitin synthase II; catalyzes transfer of N-acetylglucosamine (GlcNAc) to chitin upon activation of zymogenic form; required for chitin synthesis in the primary septum during cytokinesis; localization regulated by Cdk1p during mitosis; phosphorylation by Dbf2p kinase regulates its dynamics and chitin synthesis during cytokinesis
	CAGL0F07601g	1.49964111377883	CWP1.1	GPI-linked cell wall protein				YKL096W-A	CWP2	Covalently linked cell wall mannoprotein; major constituent of the cell wall; plays a role in stabilizing the cell wall; involved in low pH resistance; precursor is GPI-anchored
	CAGL0C02211g	1.60637947827916	UTR2	Putative glycoside hydrolase of the Crh family; predicted GPI-anchor
	CAGL0M08756g	1.64564157621726		Putative exo-1,3-beta-glucanase; predicted GPI-anchor	C1_02630C	EXG2	GPI-anchored cell wall protein, similar to S. cerevisiae exo-1,3-beta-glucosidase Exg2p; predicted Kex2p substrate; induced during cell wall regeneration; possibly an essential gene, disruptants not obtained by UAU1 method; Hap43p-repressed	YDR261C	EXG2	Exo-1,3-beta-glucanase; involved in cell wall beta-glucan assembly; may be anchored to the plasma membrane via a glycosylphosphatidylinositol (GPI) anchor
	CAGL0D01034g	2.16918641553043	VIG9	GDP-mannose pyrophosphorylase involved in the synthesis of GDP-mannose for protein glycosylation	C3_07950C	SRB1	Essential GDP-mannose pyrophosphorylase; makes GDP-mannose for protein glycosylation; functional in S. cerevisiae psa1; on yeast-form, not hyphal cell surface; alkaline induced; induced on adherence to polystyrene; Spider biofilm repressed	YDL055C	PSA1	GDP-mannose pyrophosphorylase (mannose-1-phosphate guanyltransferase); synthesizes GDP-mannose from GTP and mannose-1-phosphate in cell wall biosynthesis; required for normal cell wall structure
	CAGL0M08514g	2.28044147585019	PIR5	Pir protein family member, putative cell wall component				YKL163W	PIR3	O-glycosylated covalently-bound cell wall protein; required for cell wall stability; expression is cell cycle regulated, peaking in M/G1 and also subject to regulation by the cell integrity pathway; coding sequence contains length polymorphisms in different strains; PIR3 has a paralog, HSP150, that arose from the whole genome duplication
	CAGL0L05434g	2.56519947015104	SUN4	Ortholog(s) have role in fungal-type cell wall organization or biogenesis, mitochondrion organization and fungal-type cell wall, fungal-type vacuole localization				YJL116C	NCA3	Protein involved in mitochondrion organization; functions with Nca2p to regulate mitochondrial expression of subunits 6 (Atp6p) and 8 (Atp8p) of the Fo-F1 ATP synthase; SWAT-GFP, seamless-GFP and mCherry fusion proteins localize to the vacuole; member of the SUN family; expression induced in cells treated with the mycotoxin patulin; NCA3 has a paralog, UTH1, that arose from the whole genome dupli…
	CAGL0G08668g	3.35462360703946		Ortholog(s) have role in fungal-type cell wall organization and endoplasmic reticulum, fungal-type cell wall localization				YIL123W	SIM1	Protein of the SUN family (Sim1p, Uth1p, Nca3p, Sun4p); may participate in DNA replication; promoter contains SCB regulation box at -300 bp indicating that expression may be cell cycle-regulated; SIM1 has a paralog, SUN4, that arose from the whole genome duplication
	CAGL0I06160g	3.46161409831653	PIR4	Pir protein family member, putative cell wall component				YJL158C	CIS3	Mannose-containing glycoprotein constituent of the cell wall; member of the PIR (proteins with internal repeats) family
Adhesion and biofilm formation	CAGL0K13002g	-2.57134078544503	AED2	Putative adhesin; predicted GPI-anchor; belongs to adhesin cluster III
	CAGL0I10340g	-2.4444537915958	PWP5	Cell wall adhesin; predicted GPI anchor; contains tandem repeats; belongs to adhesin cluster II
	CAGL0H10626g	-2.32995390294082	AWP13	Predicted cell wall adhesin with a role in adhesion; belongs to adhesin cluster III; predicted GPI anchor; contains tandem repeats
	CAGL0L00583g	-2.29318880554299		Ortholog(s) have sequence-specific DNA binding, transcription factor activity, sequence-specific DNA binding activity	CR_06440C	BCR1	Transcription factor; regulates a/alpha biofilm formation, matrix, cell-surface-associated genes; confers adherence, impermeability, impenetrability, fluconazole resistance; Tup1/Tec1/Mnl1-regulated; mRNA binds She3; Spider biofilm induced	YPL230W	USV1	Putative transcription factor containing a C2H2 zinc finger; mutation affects transcriptional regulation of genes involved in growth on non-fermentable carbon sources, response to salt stress and cell wall biosynthesis; USV1 has a paralog, RGM1, that arose from the whole genome duplication
	CAGL0L02453g	-2.04678290411291		Ortholog(s) have sequence-specific DNA binding, transcription factor activity, sequence-specific DNA binding activity	C1_10150W	WOR1	Transcription factor ("master switch") of white-opaque phenotypic switching; required to establish and maintain the opaque state; opaque-specific, nuclear; regulates its own expression; suggested role in regulation of adhesion factors	YEL007W	MIT1	Transcriptional regulator of pseudohyphal growth; protein with sequence similarity to S. pombe gti1+ (gluconate transport inducer 1) and C. albicans Wor1
	CAGL0K07007g	-1.80763597643238		Ortholog(s) have mRNA binding activity and role in aerobic respiration, filamentous growth of a population of unicellular organisms in response to neutral pH, single-species biofilm formation on inanimate substrate	C3_06700C		Putative mitochondrial protein with a predicted role in respiratory growth; fluconazole-induced; ketoconazole-repressed; mutants display a strong defect in flow model biofilm formation; Spider biofilm induced	YBR238C	YBR238C	Mitochondrial membrane protein; not required for respiratory growth but causes a synthetic respiratory defect in combination with rmd9 mutations; transcriptionally up-regulated by TOR; deletion increases life span; YBR238C has a paralog, RMD9, that arose from the whole genome duplication
	CAGL0M04807g	-1.73848420535382	SNF2	Component of the chromatin remodelling Swi/Snf complex; involved in regulation of biofilm formation	C2_02100W	SNF2	Protein involved in transcriptional regulation; ortholog of S. cerevisiae Snf2p, which is the catalytic subunit of the SWI/SNF chromatin remodeling complex; interacts with Swi1p; SWI/SNF complex is essential for hyphal growth and virulence	YOR290C	SNF2	Catalytic subunit of the SWI/SNF chromatin remodeling complex; involved in transcriptional regulation; contains DNA-stimulated ATPase activity; functions interdependently in transcriptional activation with Snf5p and Snf6p
	CAGL0J09922g	-1.65420943709638		Ortholog(s) have glucan endo-1,3-beta-D-glucosidase activity	C6_00820W	SUN41	Cell wall glycosidase; role in biofilm formation and cell separation; possibly secreted; hypoxia, hyphal induced; caspofungin repressed; Efg1, Cph1 regulated; O-glycosylated, possible Kex2 substrate; 5'-UTR intron; Spider biofilm induced	YNL066W	SUN4	Cell wall protein related to glucanases; possibly involved in cell wall septation; member of the SUN family; SUN4 has a paralog, SIM1, that arose from the whole genome duplication
	CAGL0K03003g	-1.6027834745932		Ortholog(s) have RNA polymerase II activating transcription factor binding and RNA polymerase II core promoter proximal region sequence-specific DNA binding, more	C4_01190W	CAS5	Transcription factor; cell wall damage response; required for adherence, response/resistance to caspofungin; repressed in core stress response; mutants have reduced CFU in mice, hyphal defect in C. elegans infection; Spider biofilm induced	YMR070W	MOT3	Transcriptional repressor, activator; role in cellular adjustment to osmotic stress including modulation of mating efficiency; involved in repression of subset of hypoxic genes by Rox1p, repression of several DAN/TIR genes during aerobic growth, ergosterol biosynthetic genes in response to hyperosmotic stress; contributes to recruitment of Tup1p-Cyc8p general repressor to promoters; relocalizes t…
	CAGL0J02530g	-1.59168581282626		Putative adhesion protein; predicted GPI-anchor; belongs to adhesin cluster VI
	CAGL0L01771g	-1.51763089124678		Ortholog(s) have sequence-specific DNA binding, transcription factor activity, sequence-specific DNA binding activity				YKL043W	PHD1	Transcriptional activator that enhances pseudohyphal growth; physically interacts with the Tup1-Cyc8 complex and recruits Tup1p to its targets; regulates expression of FLO11, an adhesin required for pseudohyphal filament formation; similar to StuA, an A. nidulans developmental regulator; potential Cdc28p substrate; PHD1 has a paralog, SOK2, that arose from the whole genome duplication
	CAGL0G04125g	-1.48221733406149		Protein with similarity to S. cerevisiae Sag1 agglutinin, involved in cell adhesion; predicted GPI-anchor
	CAGL0A01366g	-1.44963273561852	EPA9	Putative adhesin; belongs to adhesin cluster I
	CAGL0M07634g	-1.44233119307216		Ortholog(s) have sequence-specific DNA binding, transcription factor activity, sequence-specific DNA binding activity	CR_07890W	EFG1	bHLH transcription factor; required for white-phase cell type, RPMI and Spider biofilm formation, hyphal growth, cell-wall gene regulation; roles in adhesion, virulence; Cph1 and Efg1 have role in host cytokine response; binds E-box	YMR016C	SOK2	Nuclear protein that negatively regulates pseudohyphal differentiation; plays a regulatory role in the cyclic AMP (cAMP)-dependent protein kinase (PKA) signal transduction pathway; relocalizes to the cytosol in response to hypoxia; SOK2 has a paralog, PHD1, that arose from the whole genome duplication
	CAGL0A01284g	-1.41956628914455	EPA10	Putative adhesin-like protein; belongs to adhesin cluster I
	CAGL0K10164g	-1.40415612643359		Predicted GPI-linked protein; putative adhesin-like protein				YDR077W	SED1	Major stress-induced structural GPI-cell wall glycoprotein; associates with translating ribosomes, possible role in mitochondrial genome maintenance; ORF contains two distinct variable minisatellites; SED1 has a paralog, SPI1, that arose from the whole genome duplication
	CAGL0K13024g	-1.38137124457619	AED1	Adhesin-like protein required for adherence to endothelial cells; identified in cell wall extracts by mass spectrometry; belongs to adhesin cluster III; predicted GPI anchor; 6 tandem repeats; expressed more in stationary growth phase
	CAGL0E05566g	-1.30159812112794		Ortholog(s) have sequence-specific DNA binding, transcription factor activity, sequence-specific DNA binding activity	C1_13140C	TYE7	bHLH transcription factor; control of glycolysis; required for biofilm formation; hyphally regulated by Cph1, Cyr1; flucytosine, Hog1 induced; amphotericin B, caspofungin repressed; induced in flow model biofilm and planktonic cultures	YOR344C	TYE7	Serine-rich protein that contains a bHLH DNA binding motif; binds E-boxes of glycolytic genes and contributes to their activation; may function as a transcriptional activator in Ty1-mediated gene expression; bHLH stands for basic-helix-loop-helix
	CAGL0H08844g	-1.10912618657301		Putative adhesin-like protein	C2_09220W	DDR48	Immunogenic stress-associated protein; filamentation regulated; induced by benomyl/caspofungin/ketoconazole or in azole-resistant strain; Hog1, farnesol, alkaline repressed; stationary phase enriched; Spider, flow model biofilm induced	YMR173W	DDR48	DNA damage-responsive protein; expression is increased in response to heat-shock stress or treatments that produce DNA lesions; contains multiple repeats of the amino acid sequence NNNDSYGS; protein abundance increases in response to DNA replication stress
	CAGL0K00110g	1.20652472796853	AWP2	Putative adhesin; identified in cell wall extracts by mass spectrometry; belongs to adhesin cluster V; predicted GPI-anchor
	CAGL0E06666g	1.29023503519476	EPA2	Epithelial adhesion protein; predicted GPI-anchor; belongs to adhesin cluster I
	CAGL0G09537g	1.51937315305889		Putative adhesin-like protein				YOR189W	IES4	Component of the INO80 chromatiin remodeling complex; target of the Mec1p/Tel1p DNA damage signaling pathway; proposed to link chromatin remodeling to replication checkpoint responses
	CAGL0M08448g	1.58416869192494		Ortholog(s) have mannose-ethanolamine phosphotransferase activity and role in ATP transport, GPI anchor biosynthetic process, conidium formation, regulation of growth rate	C1_12200W	MCD4	Protein of major facilitator superfamily; has phosphodiesterase/nucleotide pyrophosphatase domain; similar to S. cerevisiae Mcd4p, which acts in GPI anchor biosynthesis; possibly an essential gene, disruptants not obtained by UAU1 method	YKL165C	MCD4	Protein involved in GPI anchor synthesis; multimembrane-spanning protein that localizes to the endoplasmic reticulum; highly conserved among eukaryotes; GPI stands for glycosylphosphatidylinositol
	CAGL0M09086g	1.62491137006138		Ortholog(s) have GTP binding, cell adhesion molecule binding activity	C5_02470W	INT1	Protein structurally similar to alpha-subunit of human leukocyte integrin; role in morphogenesis, adhesion, and mouse cecal colonization and systemic virulence; similar to S. cerevisiae Bud4; Hap43-induced gene	YJR092W	BUD4	Anillin-like protein involved in bud-site selection; required for the axial budding pattern; required for the formation and disassembly of the double septin ring structure, and generally for septin organization; functions as a platform linking the cytokinesis tag septins to the axial landmark through its multiple domains; in vivo substrate of Cdc28p/Clb2p
	CAGL0F08833g	1.64420919976671		Putative adhesin-like protein	C2_01780W	MSB2	Mucin family adhesin-like protein; cell wall damage sensor; required for Cek1 phosphorylation by cell wall stress; Rim101-repressed; activation releases extracellular domain into medium; Spider biofilm induced	YGR014W	MSB2	Mucin family member involved in various signaling pathways; functions as osmosensor in the Sho1p-mediated HOG pathway; functions in Cdc42p- and MAP kinase-dependent filamentous growth signaling pathway; processed into secreted and cell-associated forms by aspartyl protease Yps1p; potential Cdc28p substrate
	CAGL0M05599g	1.87514214795963		Ortholog(s) have cell surface, endoplasmic reticulum, extracellular region, fungal-type vacuole, hyphal cell wall localization	C3_01550C	TOS1	Protein similar to alpha agglutinin anchor subunit; secreted; exogenously expressed protein is a substrate for Kex2 processing in vitro; fluconazole-induced; induced by alpha pheromone in SpiderM medium; Hap43-induced	YBR162C	TOS1	Covalently-bound cell wall protein of unknown function; identified as a cell cycle regulated SBF target gene; deletion mutants are highly resistant to treatment with beta-1,3-glucanase; has sequence similarity to YJL171C
	CAGL0I00484g	2.53390309171756		Ortholog(s) have cell adhesion molecule binding, glucan endo-1,6-beta-glucosidase activity, glucan exo-1,3-beta-glucosidase activity	C1_02990C	XOG1	Exo-1,3-beta-glucanase; 5 glycosyl hydrolase family member; affects sensitivity to chitin and glucan synthesis inhibitors; not required for yeast-to-hypha transition or for virulence in mice; Hap43-induced; Spider biofilm induced	YLR300W	EXG1	Major exo-1,3-beta-glucanase of the cell wall; involved in cell wall beta-glucan assembly; exists as three differentially glycosylated isoenzymes; EXG1 has a paralog, SPR1, that arose from the whole genome duplication
	CAGL0E06644g	2.5784581997599	EPA1	Sub-telomerically encoded adhesin with a role in cell adhesion; GPI-anchored cell wall protein; N-terminal ligand binding domain binds to ligands containing a terminal galactose residue; belongs to adhesin cluster I
	CAGL0M03773g	2.9283532093881		Predicted GPI-linked adhesin-like protein				YNL300W	TOS6	Glycosylphosphatidylinositol-dependent cell wall protein; expression is periodic and decreases in respone to ergosterol perturbation or upon entry into stationary phase; depletion increases resistance to lactic acid
	CAGL0K09130g	3.05425320841327		Putative adhesin-like protein				YOR247W	SRL1	Mannoprotein that exhibits a tight association with the cell wall; required for cell wall stability in the absence of GPI-anchored mannoproteins; has a high serine-threonine content; expression is induced in cell wall mutants; SRL1 has a paralog, SVS1, that arose from the whole genome duplication
Invasive filamentous growth and virulence	CAGL0F04807g	-2.25596440232925		Ortholog(s) have role in pathogenesis and cell surface, hyphal cell wall, integral component of mitochondrial outer membrane, plasma membrane localization	CR_01470W	CSP37	Hyphal cell wall protein; role in progression of mouse systemic infection; predicted P-loop, divalent cation binding, N-glycosylation sites; expressed in yeast and hyphae; hyphal downregulated; stationary-phase enriched; GlcNAc-induced	YIL136W	OM45	Mitochondrial outer membrane protein of unknown function; major constituent of the outer membrane, extending into the intermembrane space; interacts with porin (Por1p) and with Om14p; imported via the presequence pathway involving the TOM and TIM23 complexes, then assembled in the outer membrane by Mim1p; protein abundance increases in response to DNA replication stress
	CAGL0E01749g	-2.18257758154769	YPS4	Putative aspartic protease; member of a YPS gene cluster that is required for virulence in mice; induced in response to low pH and high temperature
	CAGL0H02959g	-2.10168102225079	TOS8	Ortholog(s) have chromatin binding, sequence-specific DNA binding activity, role in filamentous growth and nuclear chromatin localization	C7_02040C	CUP9	Transcription factor; represses SOK1 expression in response to farnesol inhibition; yeast-hypha switch repressed; ketoconazole-induced; Plc1-regulated; colony morphology-related Ssn6 regulation; Spider, flow model biofilm induced	YGL096W	TOS8	Homeodomain-containing protein and putative transcription factor; found associated with chromatin; target of SBF transcription factor; induced during meiosis and under cell-damaging conditions; TOS8 has a paralog, CUP9, that arose from the whole genome duplication
	CAGL0E02695g	-1.62961166503995	LIG4	DNA ligase IV; mutants show increased efficiency of gene targeting	C2_03030W	LIG4	DNA ligase; mRNA detected in yeast-form and pseudohyphal cells, induced upon hyphal induction; suppresses S. cerevisiae ime1-1 mutant IME2 transcription defect; required for wild-type filamentous growth and wild-type pathogenesis	YOR005C	DNL4	DNA ligase required for nonhomologous end-joining (NHEJ); forms stable heterodimer with required cofactor Lif1p, interacts with Nej1p; involved in meiosis, not essential for vegetative growth; mutations in human ortholog lead to ligase IV syndrome and Dubowitz syndrome
	CAGL0E02079g	-1.61278541147066		Ortholog(s) have sequence-specific DNA binding activity				YOL116W	MSN1	Transcriptional activator; involved in regulation of invertase and glucoamylase expression, invasive growth and pseudohyphal differentiation, iron uptake, chromium accumulation, and response to osmotic stress; localizes to the nucleus; relative distribution to the nucleus increases upon DNA replication stress
	CAGL0B00946g	-1.35415276023388		Ortholog(s) have cytosol localization				YCL028W	RNQ1	[PIN(+)] prion; an infectious protein conformation that is generally an ordered protein aggregate
	CAGL0J11242g	-1.34316954205112		Ortholog(s) have GTP binding, GTPase activity and role in filamentous growth of a population of unicellular organisms, fungal-type cell wall organization	C1_06730W	RAC1	G-protein of RAC subfamily; required for embedded filamentous growth, not for serum-induced hyphal growth; dynamic localization at plasma membrane and nucleus; similar to, but not interchangeable with, Cdc42p; lacks S. cerevisiae homolog	YNL180C	RHO5	Non-essential small GTPase of the Rho/Rac family of Ras-like proteins; RAC1 ortholog; regulated by phosphorylation and ubiquitination; likely involved in protein kinase C (Pkc1p)-dependent signal transduction pathway that controls cell integrity
	CAGL0M07315g	-1.28766862235582		Ortholog(s) have mannosyltransferase activity, role in glycosphingolipid biosynthetic process, mannosyl-inositol phosphorylceramide metabolic process, pathogenesis and fungal-type vacuole membrane localization	C2_09150W	MIT1	Mannosylinositol phosphorylceramide (MIPC) synthase catalytic subunit; sphingolipid biosynthesis; fluconazole, caspofungin induced; macrophage-repressed; Spider biofilm induced	YPL057C	SUR1	Mannosylinositol phosphorylceramide (MIPC) synthase catalytic subunit; forms a complex with regulatory subunit Csg2p; function in sphingolipid biosynthesis is overlapping with that of Csh1p; SUR1 has a paralog, CSH1, that arose from the whole genome duplication
	CAGL0F08195g	-1.13485270307879		Ortholog(s) have sequence-specific DNA binding, transcription factor activity, sequence-specific DNA binding activity	C5_04830W	SFL2	Transcription factor involved in regulation of morphogenesis; required for filamentous growth, for virulence in RHE model but not in mice; induced upon RHE infection but C. dubliniensis ortholog is not; Spider biofilm induced	YGR249W	MGA1	Protein similar to heat shock transcription factor; multicopy suppressor of pseudohyphal growth defects of ammonium permease mutants
	CAGL0K01507g	-1.10307042133549		Ortholog(s) have G-protein coupled receptor activity, glucose binding activity	C5_01250W	GPR1	Plasma membrane G-protein-coupled receptor of the cAMP-PKA pathway; detects lactate and triggers signaling pathway that regulates beta-glucan masking and immune evasion; binds Gpa2; regulates HWP1 and ECE1; required for WT hyphal growth	YDL035C	GPR1	Plasma membrane G protein coupled receptor (GPCR); interacts with the heterotrimeric G protein alpha subunit, Gpa2p, and with Plc1p; sensor that integrates nutritional signals with the modulation of cell fate via PKA and cAMP synthesis
	CAGL0I10582g	-1.10269829476362		Ortholog(s) have role in filamentous growth and intracellular localization	CR_03260W		Putative aminotransferase; Hap43-repressed; homozygous Tn insertion decreases colony wrinkling in filament-inducing conditions, does not block true hypha formation in liquid media; rat catheter and Spider biofilm induced	YGR127W	YGR127W	Putative protein of unknown function; expression is regulated by Msn2p/Msn4p, indicating a possible role in stress response
	CAGL0E06446g	1.16340982918193		Ortholog(s) have RNA lariat debranching enzyme activity, role in RNA catabolic process, mRNA cis splicing, via spliceosome, pseudohyphal growth, snoRNA metabolic process, transposition, RNA-mediated and nucleus localization	C6_02050W	DBR1	Debranchase; homozygous mutant accumulates lariat intermediates of mRNA splicing; rat catheter biofilm repressed	YKL149C	DBR1	RNA lariat debranching enzyme; catalyzes debranching of lariat introns formed during pre-mRNA splicing; required for efficient Ty1 transposition; knockdown of human homolog Dbr1 rescues toxicity of RNA-binding proteins TDP-43 and FUS which are implicated in amyotrophic lateral sclerosis (ALS), suggests potential therapeutic target for ALS and related TDP-43 proteinopathies; human homolog DBR1 can…
	CAGL0G03597g	1.22357403861177	SHO1	S. cerevisiae ortholog SHO1 has role in establishment of cell polarity, osmosensory signaling pathway, signal transduction involved in filamentous growth, cellular response to heat; osmosensitivity of CBS138 strain not seen in other strains	C1_09140C	SSU81	Predicted adaptor protein involved in activation of MAP kinase-dependent signaling pathways; links response to oxidative stress to morphogenesis and cell wall biosynthesis; caspofungin repressed	YER118C	SHO1	Transmembrane osmosensor for filamentous growth and HOG pathways; involved in activation of the Cdc42p- and MAP kinase-dependent filamentous growth pathway and the high-osmolarity glycerol (HOG) response pathway; phosphorylated by Hog1p; interacts with Pbs2p, Msb2p, Hkr1p, and Ste11p
	CAGL0F05137g	1.22395792601172		Ortholog(s) have sterol binding activity, role in pathogenesis, sterol transport and cell surface, endoplasmic reticulum, extracellular region, fungal-type vacuole localization	C1_14120C	RBE1	Pry family cell wall protein; Rim101, Efg1, Ssn6, alkaline repressed; O-glycosylation; no GPI anchor predicted; ketoconazol induced; regulated by Sef1, Sfu1, Hap4; flow model biofilm induced; rat catheter and Spider biofilm repressed	YKR013W	PRY2	Sterol binding protein involved in the export of acetylated sterols; secreted glycoprotein and member of the CAP protein superfamily (cysteine-rich secretory proteins (CRISP), antigen 5, and pathogenesis related 1 proteins); sterol export function is redundant with that of PRY1; may be involved in detoxification of hydrophobic compounds; PRY2 has a paralog, PRY1, that arose from the whole genome …
	CAGL0G08866g	1.28057415047905		Ortholog(s) have DNA replication origin binding, RNA polymerase II core promoter proximal region sequence-specific DNA binding, centromeric DNA binding and chromatin binding, more	C3_00670C	FKH2	Forkhead transcription factor; morphogenesis regulator; required for wild-type hyphal transcription, cell separation, and for virulence in cell culture; mutant lacks true hyphae, is constitutively pseudohyphal; upregulated in RHE model	YIL131C	FKH1	Forkhead family transcription factor; rate-limiting replication origin activator; evolutionarily conserved lifespan regulator; binds multiple chromosomal elements with distinct specificities, cell cycle dynamics; regulates transcription elongation, chromatin silencing at mating loci, expression of G2/M phase genes; facilitates clustering, activation of early-firing replication origins; binds HML …
	CAGL0D06446g	1.38775935824239	STT4	Ortholog(s) have 1-phosphatidylinositol 4-kinase activity, role in invasive filamentous growth, macroautophagy, mitophagy, phosphatidylinositol phosphorylation and cytosol, mitochondrion, plasma membrane localization	CR_07090W	STT4	Putative phosphatidylinositol-4-kinase	YLR305C	STT4	Phosphatidylinositol-4-kinase; functions in the Pkc1p protein kinase pathway; required for normal vacuole morphology, cell wall integrity, and actin cytoskeleton organization
	CAGL0G05489g	1.40605764136218		Ortholog(s) have GTP binding activity	C1_02230W	7-Sep	Septin, required for wild-type invasive growth in vitro but not required for virulence in a mouse model of systemic infection; localizes to hyphal septum or bud neck; Asn-rich; aberrant gel mobility; phosphorylated in vitro by Gin4p	YDL225W	SHS1	Component of the septin ring that is required for cytokinesis; present at the ends of rod-like septin hetero-oligomers; C-terminal extension is important for recruitment of Bni5p to the mother-bud neck, which in turn is required for Myo1p recruitment and cytokinesis; undergoes sumoylation and phosphorylation during mitosis; protein abundance increases in response to DNA replication stress
	CAGL0H10274g	1.45160341399888		Has domain(s) with predicted zinc ion binding activity	C3_07380W		Protein with a predicted RING-type zinc finger; possibly an essential gene, disruptants not obtained by UAU1 method	YBR062C	YBR062C	Protein of unknown function that interacts with Msb2p; may play a role in activation of the filamentous growth pathway
	CAGL0B00638g	1.63574488651731		Ortholog(s) have ATPase activity, nicotinamide-nucleotide adenylyltransferase activity	C1_13270W		Putative ATPase; predicted role in ER-associated protein catabolism; induced during chlamydospore formation in both C. albicans and C. dubliniensis; rat catheter biofilm repressed	YCL047C	POF1	Nicotinamide mononucleotide-specific adenylyltransferase (NMNAT); catalyzes the conversion of nicotinamide mononucleotide (NMN) to nicotinamide adenine dinucleotide (NAD+); role in the nicotinamide riboside (NR) salvage pathway of NAD+ biosynthesis; involved in NR and NAD+ homeostasis; ATPase involved in protein quality control and filamentation pathways; interacts physically with Kss1p and suppr…
	CAGL0M02233g	1.6375006676467		Ortholog(s) have DNA replication origin binding, protein serine/threonine kinase activity, protein serine/threonine/tyrosine kinase activity	C3_03810W	RAD53	Protein involved in regulation of DNA-damage-induced filamentous growth; putative component of cell cycle checkpoint; ortholog of S. cerevisiae Rad53p, protein kinase required for cell-cycle arrest in response to DNA damage	YPL153C	RAD53	DNA damage response protein kinase; required for cell-cycle arrest, regulation of copper genes in response to DNA damage; phosphorylates nuclear pores to counteract gene gating, preventing aberrant transitions at forks approaching transcribed genes; activates downstream kinase Dun1p; differentially senses mtDNA depletion, mitochondrial ROS; relocalizes to cytosol under hypoxia; human homolog CHEK…
	CAGL0J02244g	1.66206462905904		Ortholog(s) have role in hyphal growth and cytosol, nucleus localization
	CAGL0I09856g	1.93752097739098		Ortholog(s) have role in mitotic cell cycle, pseudohyphal growth and cytoplasm, nucleus localization				YOR315W	SFG1	Nuclear protein putative transcription factor; required for growth of superficial pseudohyphae (which do not invade the agar substrate) but not for invasive pseudohyphal growth; may act together with Phd1p; potential Cdc28p substrate
Co-factor and vitamin biosynthesis	CAGL0L00649g	-1.62683434407511		Acetyl-coenzyme A synthetase	C2_10350C	ACS1	Acetyl-CoA synthetase; induced by human neutrophils; fluconazole-repressed; regulated by Nrg1/Mig1; colony morphology-related gene regulation by Ssn6; only in stationary phase cultures; rat catheter biofilm repressed, Spider biofilm induced	YAL054C	ACS1	Acetyl-coA synthetase isoform; along with Acs2p, acetyl-coA synthetase isoform is the nuclear source of acetyl-coA for histone acetylation; expressed during growth on nonfermentable carbon sources and under aerobic conditions
	CAGL0M06721g	-1.57315906441465		Ortholog(s) have phosphopantothenate--cysteine ligase activity, role in acetyl-CoA biosynthetic process from pantothenate, coenzyme A biosynthetic process and cytosol, nucleus localization
	CAGL0G08448g	-1.48635808306321	THI7	Ortholog(s) have 5-amino-1-ribofuranosylimidazole-4-carboxamide transporter activity, thiamine transmembrane transporter activity and role in 5-amino-1-ribofuranosylimidazole-4-carboxamide transmembrane transport, thiamine transport				YLR237W	THI7	Plasma membrane transporter responsible for the uptake of thiamine; contributes to uptake of 5-aminoimidazole-4-carboxamide-1-beta-D-ribofuranoside (acadesine); member of the major facilitator superfamily of transporters; mutation of human ortholog causes thiamine-responsive megaloblastic anemia
	CAGL0M14113g	-1.2130510679465	TNR2	High-affinity transporter of NAD+ precursors; strongly induced under niacin-limiting conditions
	CAGL0M01166g	-1.16116862015907		Ortholog(s) have role in thiamine biosynthetic process, thiazole biosynthetic process and cytosol, nucleus localization
	CAGL0H07359g	-1.0657660857569	PHO8	Ortholog(s) have alkaline phosphatase activity, role in nicotinamide nucleotide metabolic process, protein dephosphorylation and extracellular region, fungal-type vacuole membrane localization	C1_08780W		Ortholog(s) have alkaline phosphatase activity, role in nicotinamide nucleotide metabolic process, protein dephosphorylation and extracellular region, fungal-type vacuole membrane localization	YDR481C	PHO8	Repressible vacuolar alkaline phosphatase; regulated by levels of Pi and by Pho4p, Pho9p, Pho80p, Pho81p and Pho85p; dephosphorylates phosphotyrosyl peptides; contributes to NAD+ metabolism by producing nicotinamide riboside from NMN
	CAGL0H01551g	1.0831623006028		Ortholog(s) have pantothenate kinase activity	C6_02980C		Putative pantothenate kinase; ortholog of S. cerevisiae Cab1; transposon mutation affects filamentous growth; repressed in core stress response	YDR531W	CAB1	Pantothenate kinase, ATP:D-pantothenate 4'-phosphotransferase; catalyzes the first committed step in the universal biosynthetic pathway for synthesis of coenzyme A (CoA); transcriptionally regulated by Upc2p via a sterol response element
	CAGL0D05302g	1.264374672351		Ortholog(s) have riboflavin synthase activity, role in riboflavin biosynthetic process and cytosol, nucleus localization
	CAGL0F06919g	1.55363588682037		Ortholog(s) have oxidoreductase activity, acting on NAD(P)H, oxygen as acceptor activity and cytoplasm localization				YIR036C	IRC24	Putative benzil reductase;(GFP)-fusion protein localizes to the cytoplasm and is induced by the DNA-damaging agent MMS; sequence similarity with short-chain dehydrogenase/reductases; null mutant has increased spontaneous Rad52p foci
	CAGL0M05687g	1.61072327618456		Ortholog(s) have NAD+ diphosphatase activity, role in NADH metabolic process and cytosol, nucleus, peroxisome localization	C6_02410W		Ortholog(s) have NAD+ diphosphatase activity, role in NADH metabolic process and cytosol, nucleus, peroxisome localization	YGL067W	NPY1	NADH diphosphatase (pyrophosphatase); hydrolyzes the pyrophosphate linkage in NADH and related nucleotides; localizes to peroxisomes; nudix hydrolase family member
	CAGL0I02574g	1.68800258888564		Ortholog(s) have NADPH dehydrogenase activity, role in apoptotic process and cytosol, mitochondrion, nucleus localization	C6_01410C	OYE2	Putative NAPDH dehydrogenase; induced by nitric oxide; Spider biofilm induced	YHR179W	OYE2	Conserved NADPH oxidoreductase containing flavin mononucleotide (FMN); responsible for geraniol reduction into citronellol during fermentation; homologous to Oye3p with different ligand binding and catalytic properties; may be involved in sterol metabolism, oxidative stress response, and programmed cell death; protein abundance increases in response to DNA replication stress
	CAGL0I02024g	2.92946789207994	OYE2	Putative NADPH dehydrogenase; protein abundance increased in ace2 mutant cells
Cellular ion homeostasis	CAGL0K06237g	-2.07085978129485		Ortholog(s) have endopolyphosphatase activity, exopolyphosphatase activity, role in polyphosphate catabolic process and cytosol, fungal-type vacuole membrane, nucleus localization	C7_00980W	PHM5	Ortholog(s) have endopolyphosphatase activity, exopolyphosphatase activity, role in polyphosphate catabolic process and cytosol, fungal-type vacuole membrane, nucleus localization	YDR452W	PPN1	Dual endo- and exopolyphosphatase with a role in phosphate metabolism; acts as both an endopolyphosphatase cleaving long chains of polyphosphate distributively to generate shorter polymer chains and as an exopolyphosphatase catalyzing the hydrolysis of terminal phosphate from polyphosphate; localizes to the vacuole, nucleus and cytosol; functions as a homodimer; relocalizes from vacuole to cytopl…
	CAGL0L12342g	-1.74911195052956		Ortholog(s) have sulfate transmembrane transporter activity, role in sulfate transport and Golgi apparatus, plasma membrane localization				YLR092W	SUL2	High affinity sulfate permease; sulfate uptake is mediated by specific sulfate transporters Sul1p and Sul2p, which control the concentration of endogenous activated sulfate intermediates
	CAGL0H04279g	-1.51716444600184	MT-IIB	Copper-binding metallothionein, involved in sequestration of metal ions; inducible by copper and silver; present in multiple (3-9) tandemly arranged copies in various strains
	CAGL0B02475g	-1.49975654257355	PHO84	Ortholog(s) have inorganic phosphate transmembrane transporter activity, manganese ion transmembrane transporter activity, phosphate:proton symporter activity, selenite:proton symporter activity	C1_11480W	PHO84	High-affinity phosphate transporter; transcript regulated by white-opaque switch; Hog1, ciclopirox olamine or alkaline induced; caspofungin, stress repressed; upregulated in RHE model; Spider and flow model biofilm induced, Hap43-induced	YML123C	PHO84	High-affinity inorganic phosphate (Pi) transporter; also low-affinity manganese transporter; regulated by Pho4p and Spt7p; mutation confers resistance to arsenate; exit from the ER during maturation requires Pho86p; cells overexpressing Pho84p accumulate heavy metals but do not develop symptoms of metal toxicity
	CAGL0L03630g	-1.22572948607362	GSH1	Putative gamma glutamylcysteine synthetase, essential for viability; role in glutathione biosynthesis; required to keep the redox homeostasis and to detoxify the cell of metal ions	C1_07880C	GCS1	Gamma-glutamylcysteine synthetase; glutathione synthesis, required for virulence;induced in low iron, H2O2, Cd, or presence of human neutrophils; possibly adherence-induced; Spider and F-12/CO2 biofilm induced	YJL101C	GSH1	Gamma glutamylcysteine synthetase; catalyzes the first step in glutathione (GSH) biosynthesis; expression induced by oxidants, cadmium, and mercury; protein abundance increases in response to DNA replication stress
	CAGL0J09306g	-1.12490295116087		Ortholog(s) have calcium:proton antiporter activity, potassium:proton antiporter activity and role in calcium ion transport, cellular calcium ion homeostasis, transmembrane transport	C1_08580C	VCX1	Putative H+/Ca2+ antiporter; Spider biofilm repressed	YDL128W	VCX1	Vacuolar membrane antiporter with Ca2+/H+ and K+/H+ exchange activity; involved in control of cytosolic Ca2+ and K+ concentrations; has similarity to sodium/calcium exchangers, including the bovine Na+/Ca2+,K+ antiporter
	CAGL0M08250g	-1.06003005438152		Ortholog(s) have zinc ion transmembrane transporter activity, role in cellular zinc ion homeostasis, zinc II ion transport and endoplasmic reticulum, fungal-type vacuole membrane localization	C2_02180W		Ortholog of S. cerevisiae Zrt3, vacuolar membrane zinc transporter; predicted Kex2 substrate; induced in oralpharyngeal candidasis; flow model biofilm induced; Spider biofilm induced	YKL175W	ZRT3	Vacuolar membrane zinc transporter; transports zinc from storage in the vacuole to the cytoplasm when needed; transcription is induced under conditions of zinc deficiency
	CAGL0C02893g	-1.01662443597995		Ortholog(s) have protein serine/threonine kinase activity	C3_00550C	HRK1	Putative serine/threonine kinase; predicted role in cellular ion homeostasis; Spider biofilm repressed	YOR267C	HRK1	Protein kinase; implicated in activation of the plasma membrane H(+)-ATPase Pma1p in response to glucose metabolism; plays a role in ion homeostasis; protein abundance increases in response to DNA replication stress
	CAGL0L08602g	1.00259390215642		Ortholog(s) have exopolyphosphatase activity, role in polyphosphate catabolic process and cytosol, nucleus localization	C2_06110W		Exopolyphosphatase, hydrolyzes inorganic polyphosphate (poly P) into Pi residues; Spider biofilm repressed	YHR201C	PPX1	Exopolyphosphatase; hydrolyzes inorganic polyphosphate (poly P) into Pi residues; located in the cytosol, plasma membrane, and mitochondrial matrix
	CAGL0M07942g	1.01543103615774		Ortholog(s) have oxidoreductase activity, oxidizing metal ions activity, role in cellular metal ion homeostasis and endoplasmic reticulum, fungal-type vacuole membrane localization	C1_09780C		Putative iron/copper reductas; involved in iron homeostasis; rat catheter and Spider biofilm induced	YLR047C	FRE8	Protein with sequence similarity to iron/copper reductases; involved in iron homeostasis; deletion mutant has iron deficiency/accumulation growth defects; expression increased in the absence of copper-responsive transcription factor Mac1p
	CAGL0K12276g	1.05426613484707	PHO88	Ortholog(s) have role in phosphate ion transport, protein maturation and endoplasmic reticulum, mitochondrion, plasma membrane localization	CR_09320C	PHO88	Protein with a role in phosphate transport; biofilm-regulated expression; amphotericin B repressed	YBR106W	PHO88	Protein involved in SRP-independent targeting of substrates to the ER; component of an alternative ER targeting pathway that has partial functional redundancy with the GET pathway; preference for substrates with downstream transmembrane domains; interacts with Snd1p, Env10p/Snd2p, and Sec61p-translocon subunits; can compensate for loss of SRP; role in phosphate transport, interacting with pho88, …
	CAGL0D05170g	1.09379640779216	PHO4	Transcription factor regulated by cyclin/cyclin-dependent kinase (CDK)/CDK inhibitor complex composed of Pho80p/Pho85p/Pho81p; required for expression of phosphate starvation genes	C4_05680W	PHO4	bHLH transcription factor of the myc-family; required for phosphate acquisition and for resistance to stresses; induced by Mnl1 under weak acid stress	YFR034C	PHO4	Basic helix-loop-helix (bHLH) transcription factor of the myc-family; activates transcription cooperatively with Pho2p in response to phosphate limitation; binding to 'CACGTG' motif is regulated by chromatin restriction, competitive binding of Cbf1p to the same DNA binding motif and cooperation with Pho2p; function is regulated by phosphorylation at multiple sites and by phosphate availability
	CAGL0F06413g	1.10614526803719	FET3	Putative copper ferroxidase involved in iron uptake	C6_00440C	FET34	Multicopper ferroxidase; induced by low iron, ciclopirox olamine, ketoconazole, hypoxia; alkaline induced by Rim101; repressed in fluconazole-resistant isolate; Sfu1, Hog1 repressed; complements S. cerevisiae fet3; Spider biofilm induced	YMR058W	FET3	Ferro-O2-oxidoreductase; multicopper oxidase that oxidizes ferrous (Fe2+) to ferric iron (Fe3+) for subsequent cellular uptake by transmembrane permease Ftr1p; required for high-affinity iron uptake and involved in mediating resistance to copper ion toxicity, belongs to class of integral membrane multicopper oxidases; protein abundance increases in response to DNA replication stress
	CAGL0E01353g	1.13129741615296		Putative high-affinity zinc transporter; gene is downregulated in azole-resistant strain
	CAGL0K05577g	1.21509442805345		Ortholog(s) have manganese ion transmembrane transporter activity, role in cellular manganese ion homeostasis and Golgi membrane, endoplasmic reticulum, late endosome, trans-Golgi network localization	C3_00390W		Putative Golgi membrane protein with a predicted role in manganese homeostasis; Hap43p-repressed gene; clade-associated gene expression	YOR079C	ATX2	Golgi membrane protein involved in manganese homeostasis; overproduction suppresses the sod1 (copper, zinc superoxide dismutase) null mutation
	CAGL0A03476g	1.22730440562824	SMF3	Ortholog(s) have role in cellular iron ion homeostasis, iron ion transport and fungal-type vacuole membrane, plasma membrane localization	C2_00580C	SMF3	Putative vacuolar iron transporter; alkaline upregulated; caspofungin repressed; induced by Mnl1 under weak acid stress; Hap43-repressed	YLR034C	SMF3	Putative divalent metal ion transporter involved in iron homeostasis; transcriptionally regulated by metal ions; member of the Nramp family of metal transport proteins; protein abundance increases in response to DNA replication stress
	CAGL0I06743g	1.29377979806748	FTR1	Putative ferrous iron transmembrane transporter involved in iron uptake	C1_14130W	FTR1	High-affinity iron permease; required for mouse virulence, low-iron growth; iron, amphotericin B, caspofungin, ciclopirox, Hog1p, Sef1p, Sfu1p, and Hap43p regulated; complements S. cerevisiae ftr1 iron transport; Hap43p-repressed	YER145C	FTR1	High affinity iron permease; involved in the transport of iron across the plasma membrane; forms complex with Fet3p; expression is regulated by iron; protein abundance increases in response to DNA replication stress
	CAGL0E02519g	1.54036219208089		Ortholog(s) have role in cellular zinc ion homeostasis, negative regulation of transcription from RNA polymerase II promoter, response to toxic substance and fungal-type vacuole, plasma membrane localization				YOL002C	IZH2	Plasma membrane receptor for plant antifungal osmotin; involved in zinc ion homeostasis, apoptosis; negatively regulates ZRT1 and other functionally divergent genes through CCCTC promoter motif (IzRE); modulates FET3 activity in iron-independent manner; affects gene expression by influencing balance of competition between Msn2p/Msn4p and Nrg1p/Nrg2p for binding to IzRE; transcription regulated by…
	CAGL0G06798g	1.58132818634293		Ortholog(s) have role in iron ion homeostasis and nucleus localization				YJR005C-A	LSO1	Protein with a potential role in response to iron deprivation; transcription increases during iron deprivation and during treatment with 2-(6-benzyl-2-pyridyl)quinazoline (BPQ) and copper; regulated by Aft1p and, to a lesser extent, by Aft2p; originally identified as a syntenic homolog of an Ashbya gossypii gene; localizes to nucleus and cytoplasm, and nuclear localization is enhanced under iron-…
	CAGL0I07491g	2.58482015997671		Ortholog(s) have role in cellular zinc ion homeostasis and fungal-type vacuole, nucleus localization				YOL101C	IZH4	Membrane protein involved in zinc ion homeostasis; member of the four-protein IZH family; expression induced by fatty acids and altered zinc levels; deletion reduces sensitivity to excess zinc; possible role in sterol metabolism; protein increases in abundance and relocalizes from nucleus to ER upon DNA replication stress; IZH4 has a paralog, IZH1, that arose from the whole genome duplication
Carbon and energy metabolism	CAGL0A01826g	-4.232052320438	HXT5	Ortholog(s) have glucose transmembrane transporter activity and plasma membrane localization				YDR345C	HXT3	Low affinity glucose transporter of the major facilitator superfamily; expression is induced in low or high glucose conditions; HXT3 has a paralog, HXT5, that arose from the whole genome duplication
	CAGL0K10428g	-3.71261565298922		Ortholog(s) have enzyme inhibitor activity, role in negative regulation of glycogen catabolic process and cytoplasm localization				YFR017C	IGD1	Cytoplasmic protein that inhibits Gdb1p glycogen debranching activity; required for normal intracellular accumulation of glycogen; phosphorylated in vivo; expression increases during wine fermentation; protein abundance increases in response to DNA replication stress; IGD1 has a paralog, YOL024W, that arose from the whole genome duplication
	CAGL0K12078g	-3.11039130707329		Ortholog(s) have RNA polymerase II core promoter proximal region sequence-specific DNA binding, RNA polymerase II repressing transcription factor binding and transcriptional repressor activity, more				YDR043C	NRG1	Transcriptional repressor; recruits the Cyc8p-Tup1p complex to promoters; mediates glucose repression and negatively regulates a variety of processes including filamentous growth and alkaline pH response; activated in stochastic pulses of nuclear localization in response to low glucose
	CAGL0H06633g	-2.05778891511583		Putative phosphoenolpyruvate carboxykinase; gene is downregulated in azole-resistant strain
	CAGL0M08800g	-2.03062615849952	YAP6	bZIP domain-containing protein				YDR259C	YAP6	Basic leucine zipper (bZIP) transcription factor; physically interacts with the Tup1-Cyc8 complex and recruits Tup1p to its targets; overexpression increases sodium and lithium tolerance; computational analysis suggests a role in regulation of expression of genes involved in carbohydrate metabolism; YAP6 has a paralog, CIN5, that arose from the whole genome duplication
	CAGL0K03421g	-1.6794662408765		Ortholog(s) have phosphoglucomutase activity	CR_02820W	PGM2	Ortholog of S. cerevisiae Pgm2; induced in planktonic culture; Tye7p-regulated; flow model biofilm induced; rat catheter biofilm repressed	YMR105C	PGM2	Phosphoglucomutase; catalyzes the conversion from glucose-1-phosphate to glucose-6-phosphate, which is a key step in hexose metabolism; functions as the acceptor for a Glc-phosphotransferase; protein abundance increases in response to DNA replication stress; PGM2 has a paralog, PGM1, that arose from the whole genome duplication
	CAGL0L03377g	-1.64120667493773		Ortholog(s) have RNA polymerase II core promoter proximal region sequence-specific DNA binding, transcriptional activator activity, RNA polymerase II core promoter proximal region sequence-specific binding activity	C3_04020C	ZCF16	Predicted Zn(II)2Cys6 transcription factor; mutants are viable; rat catheter biofilm induced	YJL089W	SIP4	C6 zinc cluster transcriptional activator; binds to the carbon source-responsive element (CSRE) of gluconeogenic genes; involved in the positive regulation of gluconeogenesis; regulated by Snf1p protein kinase; localized to the nucleus
	CAGL0E05148g	-1.61219043573685		Ortholog(s) have alpha-mannosidase activity, role in oligosaccharide catabolic process and cytosol, fungal-type vacuole membrane localization	C4_02360W	AMS1	Putative alpha-mannosidase; transcript regulated by Nrg1; induced during cell wall regeneration; flow model biofilm induced; Spider biofilm induced	YGL156W	AMS1	Vacuolar alpha mannosidase; involved in free oligosaccharide (fOS) degradation; delivered to the vacuole in a novel pathway separate from the secretory pathway
	CAGL0F04851g	-1.57898277163458		Ortholog(s) have role in aerobic respiration, mRNA metabolic process and mitochondrial outer membrane localization	C3_03510C		Ortholog(s) have role in aerobic respiration, mRNA metabolic process and mitochondrial outer membrane localization	YPR155C	NCA2	Protein that regulates expression of Fo-F1 ATP synthase subunits; involved in the regulation of mitochondrial expression of subunits 6 (Atp6p) and 8 (Atp8p) of the Fo-F1 ATP synthase; functions with Nca3p
	CAGL0M13343g	-1.57698015974231	GND1	6-phosphogluconate dehydrogenase	C1_13860C	GND1	6-phosphogluconate dehydrogenase; soluble in hyphae; farnesol, macrophage-induced protein; antigenic in mice; dual localization to cytosol and peroxisomes depends on alternative splicing; rat catheter and Spider biofilm repressed	YHR183W	GND1	6-phosphogluconate dehydrogenase (decarboxylating); catalyzes an NADPH regenerating reaction in the pentose phosphate pathway; required for growth on D-glucono-delta-lactone and adaptation to oxidative stress; GND1 has a paralog, GND2, that arose from the whole genome duplication
	CAGL0M09020g	-1.55254700114783		Ortholog(s) have succinate:fumarate antiporter activity, role in acetate catabolic process, carbon utilization, fatty acid catabolic process, fumarate transport, succinate transport and mitochondrion, plasma membrane localization	C5_04440C	SFC1	Putative succinate-fumarate transporter; involved in repression of growth on sorbose; alkaline induced; rat catheter biofilm induced; Spider biofilm induced	YJR095W	SFC1	Mitochondrial succinate-fumarate transporter; transports succinate into and fumarate out of the mitochondrion; required for ethanol and acetate utilization
	CAGL0A02321g	-1.5506559242774	HXT3	Ortholog(s) have fructose transmembrane transporter activity, glucose transmembrane transporter activity, mannose transmembrane transporter activity and role in fructose import across plasma membrane, glucose import across plasma membrane				YHR096C	HXT5	Hexose transporter with moderate affinity for glucose; induced in the presence of non-fermentable carbon sources, induced by a decrease in growth rate, contains an extended N-terminal domain relative to other HXTs; HXT5 has a paralog, HXT3, that arose from the whole genome duplication
	CAGL0M12551g	-1.49113781692603		Ortholog(s) have role in energy reserve metabolic process and cytoplasm localization				YIL057C	RGI2	Protein of unknown function; involved in energy metabolism under respiratory conditions; expression induced under carbon limitation and repressed under high glucose; RGI2 has a paralog, RGI1, that arose from the whole genome duplication
	CAGL0E05610g	-1.4449638204429		Ortholog(s) have pyruvate kinase activity, role in canonical glycolysis, pyruvate biosynthetic process and cytosol, mitochondrion localization				YOR347C	PYK2	Pyruvate kinase; appears to be modulated by phosphorylation; transcription repressed by glucose, and Pyk2p may be active under low glycolytic flux; PYK2 has a paralog, CDC19, that arose from the whole genome duplication
	CAGL0B04917g	-1.44242698613362		S-adenosylmethionine synthetase	CR_02360W	IDP2	Isocitrate dehydrogenase; white-opaque switch regulated; morphology-regulation by Ssn6; protein in exponential and stationary phase yeast; Hap43-repressed; Spider biofilm repressed by Bcr1, Tec1, Ndt80, Rob1, Brg1; Spider biofilm induced	YLR174W	IDP2	Cytosolic NADP-specific isocitrate dehydrogenase; catalyzes oxidation of isocitrate to alpha-ketoglutarate; levels are elevated during growth on non-fermentable carbon sources and reduced during growth on glucose; IDP2 has a paralog, IDP3, that arose from the whole genome duplication
	CAGL0J02904g	-1.44221003324356		Ortholog(s) have protein phosphatase regulator activity, role in glycogen metabolic process, protein dephosphorylation and protein phosphatase type 1 complex localization				YER054C	GIP2	Putative regulatory subunit of protein phosphatase Glc7p; involved in glycogen metabolism; contains a conserved motif (GVNK motif) that is also found in Gac1p, Pig1p, and Pig2p; GIP2 has a paralog, PIG2, that arose from the whole genome duplication
	CAGL0M03025g	-1.30241462277849		Ortholog(s) have RNA polymerase II core promoter proximal region sequence-specific DNA binding, transcriptional activator activity, RNA polymerase II core promoter proximal region sequence-specific binding activity	C1_08190C	CAT8	Zn(II)2Cys6 transcription factor; similar to S. cerevisiae Cat8 but mutant phenotype suggests different target genes; mutant displays increased filamentous/invasive growth; flucytosine repressed; rat catheter biofilm induced	YMR280C	CAT8	Zinc cluster transcriptional activator; necessary for derepression of a variety of genes under non-fermentative growth conditions, active after diauxic shift, binds carbon source responsive elements; relative distribution to the nucleus increases upon DNA replication stress
	CAGL0D01100g	-1.29170991172458		Has domain(s) with predicted 6-phosphofructo-2-kinase activity, ATP binding, catalytic activity and role in fructose 2,6-bisphosphate metabolic process, fructose metabolic process
	CAGL0E04884g	-1.26263626385715		Ortholog(s) have RNA polymerase II activating transcription factor binding, RNA polymerase II core promoter proximal region sequence-specific DNA binding and TFIIB-class transcription factor binding, more	C4_02500C	ADR1	C2H2 transcription factor; ortholog of S. cerevisiae Adr1 but mutant phenotype suggests a different set of target genes; transposon mutation affects filamentous growth; Spider biofilm induced	YDR216W	ADR1	Carbon source-responsive zinc-finger transcription factor; required for transcription of the glucose-repressed gene ADH2, of peroxisomal protein genes, and of genes required for ethanol, glycerol, and fatty acid utilization
	CAGL0H03993g	-1.25106899775399		Ortholog(s) have citrate (Si)-synthase activity, role in acetyl-CoA catabolic process, tricarboxylic acid cycle and glyoxysome, mitochondrion localization	CR_03500W	CIT1	Citrate synthase; induced by phagocytosis; induced in high iron; Hog1-repressed; Efg1-regulated under yeast, not hyphal growth conditions; present in exponential and stationary phase; Spider biofilm repressed; rat catheter biofilm induced	YNR001C	CIT1	Citrate synthase; catalyzes the condensation of acetyl coenzyme A and oxaloacetate to form citrate; the rate-limiting enzyme of the TCA cycle; nuclear encoded mitochondrial protein; CIT1 has a paralog, CIT2, that arose from the whole genome duplication
	CAGL0C05027g	-1.23963539248718		Ortholog(s) have role in acetate catabolic process, alcohol metabolic process, carnitine metabolic process, cellular respiration and cytosol, mitochondrion localization	C1_01740W	CTN1	Carnitine acetyl transferase; required for growth on nonfermentable carbon sources, not for hyphal growth or virulence in mice; induced in macrophage; macrophage/pseudohyphal-repressed after 16 hr; rat catheter, Spider biofilm induced	YAR035W	YAT1	Outer mitochondrial carnitine acetyltransferase; minor ethanol-inducible enzyme involved in transport of activated acyl groups from the cytoplasm into the mitochondrial matrix; phosphorylated
	CAGL0A01628g	-1.2004704562178	MIG1	Transcriptional regulatory protein	C5_02940C	MIG1	C2H2 transcription factor; repressor; regulates genes for carbon source utilization; Tup1-dependent and independent functions; hyphal, Hap43 and caspofungin repressed; Spider and flow model biofilm induced	YGL035C	MIG1	Transcription factor involved in glucose repression; sequence specific DNA binding protein containing two Cys2His2 zinc finger motifs; regulated by the SNF1 kinase and the GLC7 phosphatase; regulates filamentous growth along with Mig2p in response to glucose depletion; activated in stochastic pulses of nuclear localization, shuttling between cytosol and nucleus depending on external glucose level…
	CAGL0L09086g	-1.19847900018678		Ortholog(s) have 2-methylcitrate synthase activity, citrate (Si)-synthase activity, role in propionate catabolic process, 2-methylcitrate cycle, tricarboxylic acid cycle and mitochondrion localization				YPR001W	CIT3	Dual specificity mitochondrial citrate and methylcitrate synthase; catalyzes the condensation of acetyl-CoA and oxaloacetate to form citrate and that of propionyl-CoA and oxaloacetate to form 2-methylcitrate
	CAGL0C05137g	-1.19355840202909	GPD2	Putative glycerol 3-phosphate dehydrogenase; protein differentially expressed in azole resistant strain				YOL059W	GPD2	NAD-dependent glycerol 3-phosphate dehydrogenase; expression is controlled by an oxygen-independent signaling pathway required to regulate metabolism under anoxic conditions; located in cytosol and mitochondria; constitutively active but is inactivated via phosphorylation by energy-stress responsive kinase SNF1; GPD2 has a paralog, GPD1, that arose from the whole genome duplication
	CAGL0L03982g	-1.17025513337122		Ortholog(s) have malate synthase activity, role in acetate catabolic process, carbon utilization, fatty acid catabolic process, glyoxylate cycle and cytosol, glyoxysome, peroxisomal matrix localization	C1_09690W	MLS1	Malate synthase; glyoxylate cycle enzyme; no mammalian homolog; regulated upon white-opaque switch; phagocytosis, strong oxidative stress induced; stationary phase enriched; flow model biofilm repressed; rat catheter, Spider biofilm induced	YNL117W	MLS1	Malate synthase, enzyme of the glyoxylate cycle; involved in utilization of non-fermentable carbon sources; expression is subject to carbon catabolite repression; localizes in peroxisomes during growth on oleic acid, otherwise cytosolic; can accept butyryl-CoA as acyl-CoA donor in addition to traditional substrate acetyl-CoA
	CAGL0J07612g	-1.16464735429344	ZWF1	Glucose-6-phosphate 1-dehydrogenase	C1_08980C	ZWF1	Glucose-6-phosphate dehydrogenase; antigenic in mice; activity induced by O2 or oxidizing agents H2O2, menadione, macrophage; caspofungin repressed; induced in core stress response; regulated by Gcn2, Gcn4; rat catheter biofilm repressed	YNL241C	ZWF1	Glucose-6-phosphate dehydrogenase (G6PD); catalyzes the first step of the pentose phosphate pathway; involved in adapting to oxidative stress; protein abundance increases in response to DNA replication stress; homolog of human G6PD which is deficient in patients with hemolytic anemia; human G6PD can complement yeast zwf1 null mutant
	CAGL0J09020g	-1.14814751650483	SNF3	Putative plasma membrane high affinity glucose sensor, required for growth under glucose-limiting conditions	C3_04930C	HGT4	Glucose and galactose sensor; fermentation, filamentation, virulence roles; 20-member glucose transporter family; extended C terminus; high-glucose repressed; macrophage induced; flow model biofilm repressed; Spider biofilm induced	YDL194W	SNF3	Plasma membrane low glucose sensor, regulates glucose transport; high affinity sensor that contains 12 predicted transmembrane segments and a long C-terminal tail required for induction of hexose transporters; also senses fructose and mannose; SNF3 has a paralog, RGT2, that arose from the whole genome duplication
	CAGL0D06424g	-1.11318008616815	ACO1	Putative aconitate hydratase	CR_08210C	ACO1	Aconitase; induced in high iron; 2 upstream CCAAT motifs; amino acid starvation (3-AT), amphotericin B, phagocytosis, farnesol induced; Hap43, fluconazole-repressed; Gcn4-regulated; antigenic in infection; flow and Spider biofilm repressed	YLR304C	ACO1	Aconitase; required for the tricarboxylic acid (TCA) cycle and also independently required for mitochondrial genome maintenance; component of the mitochondrial nucleoid; mutation leads to glutamate auxotrophy; human homolog ACO2 can complement yeast null mutant
	CAGL0K03289g	-1.09548850322841		Aldose 1-epimerase	C5_01230C		Similar to an aldose 1-epimerase-related protein; antigenic during murine systemic infection; protein present in exponential and stationary phase yeast cultures; Hap43-induced; Spider biofilm repressed	YMR099C	YMR099C	Glucose-6-phosphate 1-epimerase (hexose-6-phosphate mutarotase); likely involved in carbohydrate metabolism; GFP-fusion protein localizes to both the nucleus and cytoplasm and is induced in response to the DNA-damaging agent MMS
	CAGL0K12254g	-1.0668888645204		Ortholog(s) have role in negative regulation of gluconeogenesis, proteasome-mediated ubiquitin-dependent protein catabolic process, protein catabolic process in the vacuole, protein targeting to vacuole	C3_06560W		Ortholog of S.c. Vid24; a peripheral membrane protein located at Vid (vacuole import and degradation) vesicles; regulated by Sef1, Sfu1, and Hap43; Spider biofilm induced	YBR105C	VID24	GID Complex regulatory subunit; binds GID Complex in response to glucose through interactions with complex member Vid28p; regulates fructose-1,6-bisphosphatase (FBPase) targeting to the vacuole; promotes proteasome-dependent catabolite degradation of FBPase; peripheral membrane protein located at Vid (vacuole import and degradation) vesicles
	CAGL0K08624g	-1.02648316387289	HAP4	Ortholog(s) have RNA polymerase II activating transcription factor binding, transcriptional activator activity, RNA polymerase II core promoter proximal region sequence-specific binding activity				YKL109W	HAP4	Transcription factor; subunit of the heme-activated, glucose-repressed Hap2p/3p/4p/5p CCAAT-binding complex, a transcriptional activator and global regulator of respiratory gene expression; provides the principal activation function of the complex; involved in diauxic shift
	CAGL0K10296g	1.02466866814021		Ortholog(s) have hydrolase activity, acting on ester bonds activity	CR_10780C	IAH1	Protein similar to S. cerevisiae Iah1p, which is involved in acetate metabolism; mutation confers hypersensitivity to tunicamycin; transposon mutation affects filamentous growth	YOR126C	IAH1	Isoamyl acetate-hydrolyzing esterase; required in balance with alcohol acetyltransferase to maintain optimal amounts of isoamyl acetate, which is particularly important in sake brewing
	CAGL0L09108g	1.0255908833549		Ortholog(s) have role in propionate metabolic process and mitochondrial outer membrane localization				YPR002W	PDH1	Putative 2-methylcitrate dehydratase; mitochondrial protein that participates in respiration; induced by diauxic shift; homologous to E. coli PrpD, may take part in the conversion of 2-methylcitrate to 2-methylisocitrate
	CAGL0M13013g	1.06808652780803		Ortholog(s) have 3-oxoacyl-[acyl-carrier-protein] reductase (NADPH) activity, role in aerobic respiration, fatty acid metabolic process and mitochondrion localization	CR_00710C		Ortholog(s) have 3-oxoacyl-[acyl-carrier-protein] reductase (NADPH) activity, role in aerobic respiration, fatty acid metabolic process and mitochondrion localization	YKL055C	OAR1	Mitochondrial 3-oxoacyl-[acyl-carrier-protein] reductase; may comprise a type II mitochondrial fatty acid synthase along with Mct1p; human homolog CBR4 complements yeast null mutant
	CAGL0L07480g	1.11806091394874		Ortholog(s) have double-stranded DNA binding, sequence-specific DNA binding, transcription factor activity, sequence-specific DNA binding activity	C7_04230W	NRG1	Transcription factor/repressor; regulates chlamydospore formation/hyphal gene induction/virulence and rescue/stress response genes; effects both Tup1 dependent and independent regulation; flow model biofilm induced; Spider biofilm repressed	YBR066C	NRG2	Transcriptional repressor; mediates glucose repression and negatively regulates filamentous growth; activated in stochastic pulses of nuclear localization in response to low glucose
	CAGL0K08756g	1.14776118921033	AP5	bZIP domain-containing protein				YIR018W	YAP5	Basic leucine zipper (bZIP) iron-sensing transcription factor; involved in diauxic shift; YAP5 has a paralog, YAP7, that arose from the whole genome duplication
	CAGL0B04059g	1.1651747128677		Ortholog(s) have acyl-CoA hydrolase activity, role in fatty acid beta-oxidation and glyoxysome, mitochondrion localization	C2_05980C		Ortholog(s) have acyl-CoA hydrolase activity, role in fatty acid beta-oxidation and mitochondrion, peroxisome localization	YJR019C	TES1	Peroxisomal acyl-CoA thioesterase; likely to be involved in fatty acid oxidation rather than fatty acid synthesis; conserved protein also found in human peroxisomes; TES1 mRNA levels increase during growth on fatty acids
	CAGL0F06897g	1.16540657076476		Putative protein with alcohol dehydrogenase domain; gene is downregulated in azole-resistant strain	C1_04430C		Putative protein of unknown function; clade-associated gene expression	YIR035C	YIR035C	Putative cytoplasmic short-chain dehydrogenase/reductase
	CAGL0A01804g	1.22052995938921	HXT1	Ortholog(s) have fructose transmembrane transporter activity, pentose transmembrane transporter activity, role in glucose transport, mannose transport and plasma membrane localization				YHR094C	HXT1	Low-affinity glucose transporter of the major facilitator superfamily; expression is induced by Hxk2p in the presence of glucose and repressed by Rgt1p when glucose is limiting; HXT1 has a paralog, HXT6, what arose from the whole genome duplication
	CAGL0J01441g	1.25564397456201		Ortholog(s) have alcohol dehydrogenase (NAD) activity				YMR083W	ADH3	Mitochondrial alcohol dehydrogenase isozyme III; involved in the shuttling of mitochondrial NADH to the cytosol under anaerobic conditions and ethanol production
	CAGL0B02717g	1.31382814719432		Ortholog(s) have role in acetate catabolic process, carbon utilization and cytosol, extracellular region, nucleus localization
	CAGL0K06787g	1.43183332104089		Ortholog(s) have pyruvate carboxylase activity, role in carbon utilization, cellular response to glucose starvation, gluconeogenesis, response to heat and cytosol localization	C4_03940C	PYC2	Putative pyruvate carboxylase; binds biotin cofactor; repressed by Ssk1 response regulator, by benomyl treatment, or in an azole-resistant strain overexpressing MDR1; stationary phase enriched protein; flow model biofilm repressed	YBR218C	PYC2	Pyruvate carboxylase isoform; cytoplasmic enzyme that converts pyruvate to oxaloacetate; differentially regulated than isoform Pyc1p; mutations in the human homolog are associated with lactic acidosis; PYC2 has a paralog, PYC1, that arose from the whole genome duplication
	CAGL0H06699g	1.49238955147697		Ortholog(s) have glycerol-3-phosphate dehydrogenase activity, role in NADH oxidation, glycerol metabolic process, replicative cell aging and integral component of mitochondrial outer membrane, plasma membrane localization	C4_06760W	GUT2	Glycerol-3-phosphate dehydrogenase; Plc1p-regulated; rat catheter biofilm induced; Spider biofilm induced	YIL155C	GUT2	Mitochondrial glycerol-3-phosphate dehydrogenase; expression is repressed by both glucose and cAMP and derepressed by non-fermentable carbon sources in a Snf1p, Rsf1p, Hap2/3/4/5 complex dependent manner
	CAGL0K09372g	1.57939295228499		Ortholog(s) have RNA polymerase II core promoter proximal region sequence-specific DNA binding, transcriptional repressor activity, RNA polymerase II core promoter proximal region sequence-specific binding activity				YGL209W	MIG2	Zinc finger transcriptional repressor; cooperates with Mig1p in glucose-induced gene repression; under low glucose conditions relocalizes to mitochondrion, where it interacts with Ups1p, antagonizes mitochondrial fission factor Dnm1p, indicative of a role in mitochondrial fusion or regulating morphology; regulates filamentous growth in response to glucose depletion; activated in stochastic pulses…
	CAGL0L02079g	1.60769661985165		Ortholog(s) have tricarboxylate secondary active transmembrane transporter activity, role in mitochondrial citrate transport, transmembrane transport and mitochondrion, plasma membrane localization	C3_04270C	CTP1	Putative citrate transport protein; flucytosine induced; amphotericin B repressed, caspofungin repressed; Hap43p-induced gene	YBR291C	CTP1	Mitochondrial inner membrane citrate transporter; member of the mitochondrial carrier family
	CAGL0J07084g	1.80041022369914		Ortholog(s) have oxidoreductase activity, acting on the CH-OH group of donors, NAD or NADP as acceptor activity	C4_05390W		Putative glyoxylate reductase; acts on glyoxylate and hydroxypyruvate substrates; Spider biofilm repressed	YPL113C	YPL113C	Glyoxylate reductase; acts on glyoxylate and hydroxypyruvate substrates; YPL113C is not an essential gene
	CAGL0E01529g	1.96593226959918		Ortholog(s) have role in fructose 2,6-bisphosphate metabolic process, regulation of glycolytic process	C1_11080W		Putative 6-phosphofructo-2-kinase; catalyzes synthesis of fructose-2,6-bisphosphate; Hap43-repressed; flow model, rat catheter and Spider biofilm induced	YOL136C	PFK27	6-phosphofructo-2-kinase; catalyzes synthesis of fructose-2,6-bisphosphate; inhibited by phosphoenolpyruvate and sn-glycerol 3-phosphate, expression induced by glucose and sucrose, transcriptional regulation involves protein kinase A
	CAGL0M00682g	2.03265265239099		Has domain(s) with predicted ATP binding, glucose binding, hexokinase activity, phosphotransferase activity, alcohol group as acceptor activity				YLR446W	YLR446W	Putative hexokinase; transcript is upregulated during sporulation and the unfolded protein response; YLR446W is not an essential gene
	CAGL0H06853g	2.04020308802061	ADH6	Putative NADP-dependent alcohol dehydrogenase VI; protein abundance increased in ace2 mutant cells
	CAGL0J08272g	2.05345742335879		Ortholog(s) have glyoxylate reductase activity, role in glyoxylate catabolic process and cytosol, extracellular region, mitochondrion, nucleus localization	C1_02980W	GOR1	Ortholog(s) have glyoxylate reductase activity, role in glyoxylate catabolic process and cytosol, extracellular region, mitochondrion, nucleus localization	YNL274C	GOR1	Glyoxylate reductase; null mutation results in increased biomass after diauxic shift; the authentic, non-tagged protein is detected in highly purified mitochondria in high-throughput studies; protein abundance increases in response to DNA replication stress
	CAGL0E05280g	2.19519426325537	GRE2(B)	Putative methylglyoxal reductase (NADPH-dependent)
	CAGL0I07117g	2.61571962340388		Ortholog(s) have thiamine diphosphokinase activity, role in thiamine diphosphate biosynthetic process and cytoplasm localization	C5_03840W		Thiamine pyrophosphokinase, phosphorylates thiamine to produce the coenzyme thiamine pyrophosphate (thiamine diphosphate); active as a homodimer	YOR143C	THI80	Thiamine pyrophosphokinase; phosphorylates thiamine to produce the coenzyme thiamine pyrophosphate (thiamine diphosphate)
	CAGL0A01782g	2.96018916343664	HXT4	Ortholog(s) have glucose transmembrane transporter activity, pentose transmembrane transporter activity and plasma membrane localization				YHR092C	HXT4	High-affinity glucose transporter; member of the major facilitator superfamily, expression is induced by low levels of glucose and repressed by high levels of glucose; HXT4 has a paralog, HXT7, that arose from the whole genome duplication
Mitochondrion organization	CAGL0C02739g	-2.3013570484766		Ortholog(s) have role in mitochondrion organization, phospholipid homeostasis and integral component of mitochondrial outer membrane localization	C1_09060C		Protein of unknown function; possibly membrane bound; mutants are viable; rat catheter biofilm repressed	YAL008W	FUN14	Integral mitochondrial outer membrane (MOM) protein; dosage suppressor of an MDM10 null that reduces ERMES-related phenotypes, such as alterations in mitochondrial morphology, protein complex assembly, and lipid profile; dosage suppressor of MDM12, MDM34, and MMM1 null mutant growth defects; novel mechanism of MOM import involving Tom70p, the TOM complex, and the TIM23 complex, requiring mitochon…
	CAGL0K12100g	-1.98733887299025		Putative coproporphyrinogen III oxidase; protein differentially expressed in azole resistant strain	C3_04060C	HEM13	Coproporphyrinogen III oxidase; antigenic; on yeast cell surface, not hyphae; iron-regulated expression; Hap43, macrophage-repressed; farnesol-induced; possibly essential; flow model biofilm induced; rat catheter, Spider biofilm repressed	YDR044W	HEM13	Coproporphyrinogen III oxidase; oxygen-requiring enzyme that catalyzes sixth step in heme biosynthetic pathway; transcription is repressed by oxygen and heme (via Rox1p and Hap1p); human homolog CPOX can complement yeast mutant and allow growth of haploid null after sporulation of a heterozygous diploid
	CAGL0B01875g	-1.69915012282768		Ortholog(s) have mitochondrial respiratory chain complex IV, mitochondrial respiratory chain supercomplex localization				YDR119W-A	COX26	Stabilizes or regulates formation of respiratory chain supercomplexes composed of Complex III (ubiquinol-cytochrome c reductase) and Complex IV (cytochrome c oxidase)
	CAGL0J09262g	-1.31314730254252		Ortholog(s) have ATPase binding activity, role in negative regulation of ATPase activity and mitochondrion localization				YDL130W-A	STF1	Protein involved in regulation of the mitochondrial F1F0-ATP synthase; Stf1p and Stf2p act as stabilizing factors that enhance inhibitory action of the Inh1p protein; protein abundance increases in response to DNA replication stress; STF1 has a paralog, INH1, that arose from the whole genome duplication
	CAGL0I09394g	-1.26732521659714		Ortholog(s) have role in mitochondrial respiratory chain complex II assembly and mitochondrial matrix localization	C2_02620W		Putative mitochondrial protein of unknown function; regulated by Sef1p-, Sfu1p-, and Hap43p	YBR269C	SDH8	Protein required for assembly of succinate dehydrogenase; interacts with flavinylated Sdh1p and may function as a chaperone for free Sdh1p, protecting its FAD cofactor from redox reactions before assembly of the complex; soluble protein of the mitochondrial matrix; respiratory defect of null mutant is functionally complemented by Drosophila and human orthologs
	CAGL0H09504g	-1.20287850288063		Ortholog(s) have oxygen-dependent protoporphyrinogen oxidase activity, role in heme biosynthetic process and cytosol, mitochondrial inner membrane, nucleus localization	C1_08880W	HEM14	Putative protoporphyrinogen oxidase; involved in heme biosynthesis; predicted Kex2p substrate; iron regulated transcript; Yfh1-induced; Hap43-repressed; rat catheter biofilm repressed	YER014W	HEM14	Protoporphyrinogen oxidase; a mitochondrial enzyme that catalyzes the seventh step in the heme biosynthetic pathway, converting protoporphyrinogen IX to protoporphyrin IX; inhibited by diphenyl ether-type herbicides
	CAGL0J06380g	-1.16361744826333		Ortholog(s) have ATPase inhibitor activity, role in negative regulation of ATPase activity and mitochondrion, nucleus localization				YDL181W	INH1	Protein that inhibits ATP hydrolysis by the F1F0-ATP synthase; inhibitory function is enhanced by stabilizing proteins Stf1p and Stf2p; has a calmodulin-binding motif and binds calmodulin in vitro; INH1 has a paralog, STF1, that arose from the whole genome duplication
	CAGL0M09537g	-1.08995633952121		Ortholog(s) have mitochondrial inner membrane localization	C2_05170W		Ortholog(s) have mitochondrial inner membrane localization	YBL095W	YBL095W	Protein that associates with mitochondrial ribosome; likely functions in cristae junction formation; the authentic, non-tagged protein is detected in highly purified mitochondria in high-throughput studies
	CAGL0D01606g	1.05457424936407		Ortholog(s) have glycine transmembrane transporter activity, role in glycine import, mitochondrial transport and fungal-type vacuole, mitochondrion localization	C1_07200W	YMC1	Putative inner mitochondrial membrane transporter; flucytosine induced; Spider biofilm repressed	YPR058W	YMC1	Secondary mitochondrial inner membrane glycine transporter; required with HEM25 for the transport of glycine into mitochondria for the initiation of heme biosynthesis; proposed role in oleate metabolism and glutamate biosynthesis; member of the mitochondrial carrier (MCF) family; localizes to the vacuole in response to H2O2; YMC1 has a paralog, YMC2, that arose from the whole genome duplication
	CAGL0L03201g	1.05760135962635		Ortholog(s) have role in mitochondrial fission, peroxisome fission, regulation of transcription from RNA polymerase II promoter and CCR4-NOT complex, mitochondrion localization				YKR036C	CAF4	WD40 repeat-containing protein associated with the CCR4-NOT complex; interacts in a Ccr4p-dependent manner with Ssn2p; also interacts with Fis1p, Mdv1p and Dnm1p and plays a role in mitochondrial fission; CAF4 has a paralog, MDV1, that arose from the whole genome duplication
	CAGL0J06226g	1.05824935440447		Ortholog(s) have phosphatidylserine decarboxylase activity	C1_00610W	PSD1	Phosphatidylserine decarboxylase; involved in phosphatidylethanolamine synthesis; Spider biofilm repressed	YNL169C	PSD1	Phosphatidylserine decarboxylase of the mitochondrial inner membrane; converts phosphatidylserine to phosphatidylethanolamine; regulates mitochondrial fusion and morphology by affecting lipid mixing in the mitochondrial membrane and by influencing the ratio of long to short forms of Mgm1p; partly exposed to the mitochondrial intermembrane space; autocatalytically processed
	CAGL0D04730g	1.06695744015128		Ortholog(s) have role in potassium ion transport, protein insertion into mitochondrial membrane, proton transport and mitochondrial inner membrane, plasma membrane localization	C1_01320W	MRS7	Member of the LETM1-like protein family, mitochondrial membrane protein	YPR125W	YLH47	Mitochondrial inner membrane protein; exposed to the mitochondrial matrix; associates with mitochondrial ribosomes; NOT required for respiratory growth; homolog of human Letm1, a protein implicated in Wolf-Hirschhorn syndrome
	CAGL0I02706g	1.09612278439223		Ortholog(s) have structural constituent of ribosome activity and mitochondrial large ribosomal subunit localization	C3_01080W	MRPL33	Putative mitochondrial ribosomal protein of the large subunit; Ssr1-repressed; rat catheter biofilm induced	YMR286W	MRPL33	Mitochondrial ribosomal protein of the large subunit
	CAGL0M08624g	1.12405950129059		Ortholog(s) have tryptophan-tRNA ligase activity, role in mitochondrial tryptophanyl-tRNA aminoacylation and mitochondrion localization	C5_02770W	MSW1	Protein similar to S. cerevisiae Msw1p, which is mitochondrial tryptophanyl-tRNA synthetase; Hap43p-repressed gene; likely to be essential for growth, based on an insertional mutagenesis strategy	YDR268W	MSW1	Mitochondrial tryptophanyl-tRNA synthetase
	CAGL0E04400g	1.13481592248324		Ortholog(s) have serine-tRNA ligase activity, role in mitochondrial seryl-tRNA aminoacylation, spore germination and mitochondrion localization	C6_00390W		Ortholog(s) have serine-tRNA ligase activity, role in mitochondrial seryl-tRNA aminoacylation, spore germination and mitochondrion localization	YHR011W	DIA4	Probable mitochondrial seryl-tRNA synthetase; mutant displays increased invasive and pseudohyphal growth
	CAGL0H00550g	1.15422128119789		Ortholog(s) have role in mitochondrial genome maintenance and endoplasmic reticulum localization	C1_03540C		Ortholog(s) have role in mitochondrial genome maintenance and endoplasmic reticulum localization	YJR118C	ILM1	Protein of unknown function; may be involved in mitochondrial DNA maintenance; required for slowed DNA synthesis-induced filamentous growth
	CAGL0F01529g	1.15604440147876		Ortholog(s) have role in mitochondrial translation and cytosol, mitochondrion localization	C1_13060C		Ortholog(s) have role in mitochondrial translation and cytosol, mitochondrion localization	YLR069C	MEF1	Mitochondrial elongation factor involved in translational elongation
	CAGL0L03652g	1.15979080037687		Ortholog(s) have role in mitochondrial genome maintenance, regulation of mitochondrial membrane potential and cytosol, mitochondrion localization	C1_07000W	MEF2	Putative mitochondrial translation elongation factor; caspofungin induced	YJL102W	MEF2	Mitochondrial elongation factor involved in translational elongation
	CAGL0A01980g	1.15990280326099		Ortholog(s) have GTPase activity, tRNA binding, translation initiation factor activity, role in mitochondrial translation and cell periphery, mitochondrion, nucleus localization	C7_02940C	IFM1	Putative mitochondrial translation initiation factor; transcript regulated by Nrg1, Mig1, and Tup1	YOL023W	IFM1	Mitochondrial translation initiation factor 2
	CAGL0C05335g	1.16741907720802	RTG1	Ortholog(s) have RNA polymerase II transcription factor activity, sequence-specific DNA binding, transcription regulatory region DNA binding activity	C1_08640W	RTG1	RNA polymerase II transcription factor involved in regulation of galactose catabolism genes; as result of transcriptional rewiring, performs role analogous to Gal4p in S. cerevisiae	YOL067C	RTG1	Transcription factor (bHLH) involved in interorganelle communication; contributes to communication between mitochondria, peroxisomes, and nucleus; target of Hog1p; activated in stochastic pulses of nuclear localization
	CAGL0I04796g	1.23672533938363		Ortholog(s) have mitochondrial envelope localization				YBR024W	SCO2	Protein anchored to mitochondrial inner membrane; may have a redundant function with Sco1p in delivery of copper to cytochrome c oxidase; interacts with Cox2p; SCO2 has a paralog, SCO1, that arose from the whole genome duplication
	CAGL0L12606g	1.44249502588724		Ortholog(s) have role in mitochondrial translation and cytosol, mitochondrion localization	CR_03400W		Protein similar to isoleucyl-tRNA synthetase; isoleucyl-tRNA synthetase is the target of drugs including the cyclic beta-amino acid icofungipen/PLD-118/BAY-10-8888 and mupirocin	YPL040C	ISM1	Mitochondrial isoleucyl-tRNA synthetase; null mutant is deficient in respiratory growth; human homolog IARS2 implicated in mitochondrial diseases, can partially complement yeast null mutant
	CAGL0D03542g	1.54555623269557		Ortholog(s) have threonine-tRNA ligase activity, role in mitochondrial threonyl-tRNA aminoacylation and mitochondrion localization	C1_02930C	MST1	Ortholog(s) have role in mitochondrial threonyl-tRNA aminoacylation and mitochondrion localization	YKL194C	MST1	Mitochondrial threonyl-tRNA synthetase; aminoacylates both the canonical threonine tRNA tT(UGU)Q1 and the unusual threonine tRNA tT(UAG)Q2 in vitro; lacks a typical editing domain, but has pre-transfer editing activity stimulated by the unusual tRNA-Thr
	CAGL0E02871g	1.56352386274154		Ortholog(s) have methionyl-tRNA formyltransferase activity, role in conversion of methionyl-tRNA to N-formyl-methionyl-tRNA and mitochondrion localization	C4_06070C	FMT1	Putative methionyl-tRNA transformylase; induced upon adherence to polystyrene	YBL013W	FMT1	Methionyl-tRNA formyltransferase; catalyzes the formylation of initiator Met-tRNA in mitochondria; potential Cdc28p substrate
	CAGL0K04521g	1.66623325489097		Ortholog(s) have membrane insertase activity, role in protein insertion into mitochondrial membrane from inner side and integral component of mitochondrial inner membrane localization	C5_04620C		Ortholog(s) have membrane insertase activity, role in mitochondrial respiratory chain complex IV assembly, protein insertion into mitochondrial membrane from inner side and integral component of mitochondrial inner membrane localization	YGR062C	COX18	Protein required for membrane insertion of C-terminus of Cox2p; mitochondrial integral inner membrane protein; interacts genetically and physically with Mss2p and Pnt1p; similar to S. cerevisiae Oxa1, N. crassa Oxa2p, and E. coli YidC; respiratory defect of the null mutant is functionally complemented by human COX18 carrying the N-terminal 54 amino acids of S. cerevisiae Cox18p
	CAGL0C02695g	1.68668902218532		Ortholog(s) have role in establishment of mitochondrion localization, mitochondrial outer membrane translocase complex assembly, mitochondrion distribution and mitochondrion morphogenesis, more	C2_04800C	MDM10	Predicted component of the mitochondrial sorting and assembly machinery (SAM complex) and ER-mitochondria encounter structure (ERMES) complex with a role in protein import into mitochondria	YAL010C	MDM10	Subunit of both the ERMES and the SAM complex; component of ERMES complex which acts as a molecular tether between the mitochondria and the ER, necessary for efficient phospholipid exchange between organelles and for mitophagy; SAM/TOB complex component that functions in the assembly of outer membrane beta-barrel proteins; involved in mitochondrial inheritance and morphology; ERMES complex is oft…
	CAGL0L07392g	1.72333597382675		Ortholog(s) have serine-type endopeptidase activity, role in mitochondrial tRNA threonylcarbamoyladenosine modification, tRNA threonylcarbamoyladenosine modification and mitochondrion localization	C4_00810C		Ortholog(s) have serine-type endopeptidase activity, role in mitochondrial tRNA threonylcarbamoyladenosine modification, tRNA threonylcarbamoyladenosine modification and mitochondrion localization	YDL104C	QRI7	Protein involved in threonylcarbamoyl adenosine biosynthesis; Sua5p and Qri7p are necessary and sufficient for RNA t6A modification in vitro; highly conserved mitochondrial protein; essential for t6A modification of mitochondrial tRNAs that decode ANN codons; similar to Kae1p and E. coli YgjD, both of which are also required for tRNA t6A modification; when directed to the cytoplasm, complements t…
	CAGL0L08068g	1.82531925904069		Ortholog(s) have single-stranded telomeric DNA binding activity, role in mitochondrial genome maintenance, positive regulation of mitochondrial DNA replication and mitochondrial nucleoid localization	C1_05680C	RIM1	Putative single-stranded DNA-binding protein; protein level decreases in stationary phase cultures; rat catheter biofilm repressed	YCR028C-A	RIM1	ssDNA-binding protein essential for mitochondrial genome maintenance; involved in mitochondrial DNA replication; stimulates utilization by Mip1p DNA polymerase of RNA primers synthesized by Rpo41p
	CAGL0L04664g	1.82853134280118	HEM15	Ortholog(s) have 2 iron, 2 sulfur cluster binding, ferrochelatase activity, role in heme biosynthetic process and cytosol, mitochondrial inner membrane, nucleus localization	C2_07490W	HEM15	Putative ferrochelatase involved in heme biosynthesis; transcript not regulated by iron levels and not affected by a yfh1 null mutation; Spider biofilm repressed	YOR176W	HEM15	Ferrochelatase; a mitochondrial inner membrane protein, catalyzes insertion of ferrous iron into protoporphyrin IX, the eighth and final step in the heme biosynthetic pathway; human homolog FECH can complement yeast mutant and allow growth of haploid null after sporulation of a heterozygous diploid
	CAGL0I08723g	1.84063279104559		Ortholog(s) have methionine-tRNA ligase activity, role in methionyl-tRNA aminoacylation and mitochondrion localization	C5_04650C	MSM1	Mitochondrial methionyl-tRNA synthetase (MetRS); functionally complements methionine auxotrophy of an E. coli MetRS mutant; transcript regulated by Nrg1; flow model biofilm induced	YGR171C	MSM1	Mitochondrial methionyl-tRNA synthetase (MetRS); functions as a monomer in mitochondrial protein synthesis; functions similarly to cytoplasmic MetRS although the cytoplasmic form contains a zinc-binding domain not found in Msm1p
	CAGL0M01518g	1.85465028161825	SHE9	Mitochondrial inner membrane protein of unknown function	C2_03050W	SHE9	Protein with similarity to S. cerevisiae She9p, which inhibits growth when overproduced; gene has possible growth-regulation element; fungal-specific (no human or murine homolog)	YDR393W	SHE9	Protein required for normal mitochondrial morphology; mitochondrial inner membrane protein; may be involved in fission of the inner membrane; forms a homo-oligomeric complex
	CAGL0K06919g	1.87668312215113	MCX1	Putative mitochondrial clpX-like chaperone				YBR227C	MCX1	Non-proteolytic ATPase of the AAA family; stimulates incorporation of the pyridoxal phosphate cofactor into Hem1p (5-aminolevulinic acid synthase); localized to the mitochondrial matrix; ortholog of vertebrate CLPX, which promotes erythropoiesis
	CAGL0J03212g	2.96263760531221	ALD5	Putative mitochondrial aldehyde dehydrogenase (NAD+); protein abundance increased in ace2 mutant cells	C2_02970C	ALD5	NAD-aldehyde dehydrogenase; decreased expression in fluconazole-resistant isolate, or in hyphae; biofilm induced; fluconazole-downregulated; protein abundance is affected by URA3 expression in the CAI-4 strain; stationary phase enriched	YER073W	ALD5	Mitochondrial aldehyde dehydrogenase; involved in regulation or biosynthesis of electron transport chain components and acetate formation; activated by K+; utilizes NADP+ as the preferred coenzyme; constitutively expressed
Nitrogen metabolism	CAGL0M03465g	-2.90347880573075		Ortholog(s) have ammonium transmembrane transporter activity and role in ammonium transport, nitrogen utilization, plasma membrane acetate transport	C2_06680W	FRP3	Putative ammonium transporter; upregulated in the presence of human neutrophils; fluconazole-downregulated; repressed by nitric oxide; Spider biofilm induced; rat catheter biofilm repressed	YNR002C	ATO2	Putative transmembrane protein involved in export of ammonia; ammonia is a starvation signal that promotes cell death in aging colonies; phosphorylated in mitochondria; member of the TC 9.B.33 YaaH family; homolog of Y. lipolytica Gpr1p; ATO2 has a paralog, ADY2, that arose from the whole genome duplication
	CAGL0C04191g	-2.02719534405534		Ortholog(s) have succinate-semialdehyde dehydrogenase [NAD(P)+] activity and role in cellular response to oxidative stress, gamma-aminobutyric acid catabolic process, glutamate decarboxylation to succinate	C3_03470W		Succinate semialdehyde dehydrogenase; for utilization of gamma-aminobutyrate (GABA) as a nitrogen source; part of 4-aminobutyrate and glutamate degradation pathways; rat catheter biofilm induced	YBR006W	UGA2	Succinate semialdehyde dehydrogenase; involved in the utilization of gamma-aminobutyrate (GABA) as a nitrogen source; part of the 4-aminobutyrate and glutamate degradation pathways; localized to the cytoplasm
	CAGL0H02585g	-1.50087322150751		Ortholog(s) have glutamate decarboxylase activity, role in cellular response to oxidative stress, glutamate catabolic process and cytoplasm localization	C1_11660W	GAD1	Putative glutamate decarboxylase; alkaline, macrophage-downregulated gene; amphotericin B induced; induced by Mnl1 under weak acid stress; stationary phase enriched protein; rat catheter biofilm repressed	YMR250W	GAD1	Glutamate decarboxylase; converts glutamate into gamma-aminobutyric acid (GABA) during glutamate catabolism; involved in response to oxidative stress
	CAGL0I08613g	-1.45150569006885	DUR3	Putative plasma membrane polyamine transporter
	CAGL0A03212g	-1.17970132768684		Ortholog(s) have ammonium transmembrane transporter activity, role in ammonium transport, nitrogen utilization, transmembrane transport and mitochondrion, plasma membrane localization				YDR384C	ATO3	Plasma membrane protein, putative ammonium transporter; regulation pattern suggests a possible role in export of ammonia from the cell; phosphorylated in mitochondria; member of the TC 9.B.33 YaaH family of putative transporters
	CAGL0G05698g	-1.05051188026314	GDH2	Ortholog(s) have glutamate dehydrogenase (NAD+) activity, role in nitrogen compound metabolic process and cytosol, mitochondrion localization	C2_07900W	GDH2	Putative NAD-specific glutamate dehydrogenase; fungal-specific; transcript regulated by Nrg1, Mig1, Tup1, and Gcn4; stationary phase enriched protein; flow model biofilm induced; Spider biofilm induced	YDL215C	GDH2	NAD(+)-dependent glutamate dehydrogenase; degrades glutamate to ammonia and alpha-ketoglutarate; expression sensitive to nitrogen catabolite repression and intracellular ammonia levels; genetically interacts with GDH3 by suppressing stress-induced apoptosis
	CAGL0G04389g	1.12334659327785		Ortholog(s) have RNA polymerase II transcription factor activity, sequence-specific DNA binding, sequence-specific DNA binding activity	CR_02850C	GZF3	GATA-type transcription factor; oxidative stress-induced via Cap1; mutant has abnormal colony morphology and altered sensitivity to fluconazole, LiCl, and copper; Spider biofilm induced	YJL110C	GZF3	GATA zinc finger protein; negatively regulates nitrogen catabolic gene expression by competing with Gat1p for GATA site binding; function requires a repressive carbon source; dimerizes with Dal80p and binds to Tor1p; GZF3 has a paralog, DAL80, that arose from the whole genome duplication
	CAGL0J06028g	1.61956632733007	MEP2	Ortholog(s) have high-affinity secondary active ammonium transmembrane transporter activity, methylammonium transmembrane transporter activity	C4_00430W	MEP2	Ammonium permease and regulator of nitrogen starvation-induced filamentation; 11 predicted transmembrane regions; in low nitrogen cytoplasmic C-terminus activates Ras/cAMP and MAPK signal transduction pathways to induce filamentation	YNL142W	MEP2	Ammonium permease involved in regulation of pseudohyphal growth; belongs to a ubiquitous family of cytoplasmic membrane proteins that transport only ammonium (NH4+); expression is under the nitrogen catabolite repression regulation
	CAGL0K03157g	2.40446361386073	DUR31	Putative plasma membrane polyamine transporter	C1_04650W	DUR3	High affinity spermidine transporter; expression is induced by urea; fungal-specific (no human or murine homolog); not required for virulence in a mouse intravenous model	YHL016C	DUR3	Plasma membrane transporter for both urea and polyamines; expression is highly sensitive to nitrogen catabolite repression and induced by allophanate, the last intermediate of the allantoin degradative pathway
	CAGL0M05533g	2.77171967699491	DUR1,2	Ortholog(s) have role in nitrogen compound metabolic process
Aminoacid metabolism	CAGL0M00154g	-2.60447381729524	CYN1	Plasma membrane high affinity cystine specific transporter; present only in pathogenic yeasts; confers the ability to utilize cystine as a sulfur source
	CAGL0L02321g	-2.39611257730056		Ortholog(s) have adenylylsulfate kinase activity, role in sulfate assimilation, phosphoadenylyl sulfate reduction by phosphoadenylyl-sulfate reductase (thioredoxin), sulfur amino acid metabolic process and cytosol, nucleus localization	C5_00430W	MET14	Putative adenylylsulfate kinase; predicted role in sulfur metabolism; possibly adherence-induced; protein present in exponential and stationary growth phase yeast; F-12/CO2 biofilm induced	YKL001C	MET14	Adenylylsulfate kinase; required for sulfate assimilation and involved in methionine metabolism; human homolog PAPSS2 complements yeast null mutant
	CAGL0L12254g	-1.98742680219027		Ortholog(s) have L-alanine:2-oxoglutarate aminotransferase activity, role in alanine biosynthetic process, alanine catabolic process, cellular response to drug, chronological cell aging and cytosol, mitochondrion, nucleus localization	C3_03480C	ALT1	Putative alanine transaminase; mutation confers hypersensitivity to 5-fluorocytosine (5-FC); rat catheter and flow model biofilm induced	YLR089C	ALT1	Alanine transaminase (glutamic pyruvic transaminase); involved in alanine biosynthesis and catabolism; TOR1-independent role in determining chronological lifespan; expression is induced in the presence of alanine; repression is mediated by Nrg1p; ALT1 has a paralog, ALT2, that arose from the whole genome duplication; Alt2p is catalytically inactive
	CAGL0L12012g	-1.86445107901382		Ortholog(s) have trans-aconitate 3-methyltransferase activity and cytosol localization	C1_05830W		Ortholog(s) have trans-aconitate 3-methyltransferase activity and cytosol, nucleus localization	YER175C	TMT1	Trans-aconitate methyltransferase; cytosolic enzyme that catalyzes the methyl esterification of 3-isopropylmalate, an intermediate of the leucine biosynthetic pathway, and trans-aconitate, which inhibits the citric acid cycle
	CAGL0G01903g	-1.61769833739376	MET1	Ortholog(s) have uroporphyrin-III C-methyltransferase activity, role in cellular response to drug, methionine biosynthetic process, siroheme biosynthetic process and nucleus localization	C2_02940W	MET1	Putative uroporphyrin-3 C-methyltransferase, methionine biosynthesis enzyme; upregulated by human whole blood or polymorphonuclear (PMN) cells; Hog1p-induced; fungal-specific (no human or murine homolog); Hap43p-repressed	YKR069W	MET1	S-adenosyl-L-methionine uroporphyrinogen III transmethylase; involved in the biosynthesis of siroheme, a prosthetic group used by sulfite reductase; required for sulfate assimilation and methionine biosynthesis
	CAGL0K08668g	-1.47156823413963	MET28	bZIP domain-containing protein	C7_00730W	MET28	Predicted bZIP domain-containing transcription factor; protein induced during the mating process; possibly essential, disruptants not obtained by UAU1 method; Hap43-repressed; rat catheter biofilm induced	YIR017C	MET28	bZIP transcriptional activator in the Cbf1p-Met4p-Met28p complex; participates in the regulation of sulfur metabolism
	CAGL0B02651g	-1.40200691165499		Ortholog(s) have RNA polymerase II activating transcription factor binding, RNA polymerase II transcription factor activity and sequence-specific transcription regulatory region DNA binding, more	C2_10230W		Putative C2H2 transcription factor; expression upregulated in clinical isolates from HIV+ patients with oral candidiasis; Spider biofilm induced	YDR253C	MET32	Zinc-finger DNA-binding transcription factor; involved in transcriptional regulation of the methionine biosynthetic genes; targets strong transcriptional activator Met4p to promoters of sulfur metabolic genes; feedforward loop exists in the regulation of genes controlled by Met4p and Met32p; lack of such a loop for MET31 may account for the differential actions of Met32p and Met31p; MET32 has a p…
	CAGL0L13046g	-1.33353770603314		Ortholog(s) have role in iron-sulfur cluster assembly and cytosol, nucleus localization	C7_02550C		Protein of unknown function, transcript is upregulated in clinical isolates from HIV+ patients with oral candidiasis	YHR122W	CIA2	Component of cytosolic iron-sulfur protein assembly (CIA) machinery; acts at a late step of Fe-S cluster assembly; forms the CIA targeting complex with Cia1p and Met18p that directs Fe-S cluster incorporation into a subset of proteins involved in methionine biosynthesis, DNA replication and repair, transcription, and telomere maintenance; ortholog of human FAM96B
	CAGL0D06402g	-1.28537357460474	MET15	O-acetyl homoserine sulfhydrylase (OAHSH), ortholog of S. cerevisiae MET17; required for utilization of inorganic sulfate as sulfur source; able to utilize cystine as a sulfur source while S. cerevisiae met15 mutants are unable to do so	C4_00200C	MET15	O-acetylhomoserine O-acetylserine sulfhydrylase; sulfur amino acid synthesis; immunogenic; Hog1, adherence-induced; brown color of mutant in Pb(2+) medium a visual selection; chlamydospore formation induced, F-12/CO2 biofilm induced	YLR303W	MET17	O-acetyl homoserine-O-acetyl serine sulfhydrylase; required for Methionine and cysteine biosynthesis
	CAGL0M04499g	-1.27967447734024		Ortholog(s) have proline dehydrogenase activity, role in proline catabolic process to glutamate and mitochondrion localization	C5_02600W	PUT1	Putative proline oxidase; alkaline upregulated by Rim101; flow model biofilm induced; Spider biofilm induced	YLR142W	PUT1	Proline oxidase; nuclear-encoded mitochondrial protein involved in utilization of proline as sole nitrogen source; PUT1 transcription is induced by Put3p in the presence of proline and the absence of a preferred nitrogen source
	CAGL0L01089g	-1.276247926315	GLT1	Ortholog(s) have glutamate synthase (NADH) activity, role in glutamate biosynthetic process and cytosol, mitochondrion localization	C1_06550W	GLT1	Putative glutamate synthase; regulated by Sef1, Sfu1, and Hap43; rat catheter biofilm repressed	YDL171C	GLT1	NAD(+)-dependent glutamate synthase (GOGAT); synthesizes glutamate from glutamine and alpha-ketoglutarate; with Gln1p, forms the secondary pathway for glutamate biosynthesis from ammonia; expression regulated by nitrogen source; assembles into filaments as cells approach stationary phase and under cytosolic acidification and starvation conditions
	CAGL0E00759g	-1.18229254326338		Ortholog(s) have inositol tetrakisphosphate 3-kinase activity, inositol tetrakisphosphate 6-kinase activity and inositol-1,3,4,5,6-pentakisphosphate kinase activity, more	C2_09730C	IPK2	Putative inositol polyphosphate multikinase; moderately induced at 42 deg	YDR173C	ARG82	Inositol polyphosphate multikinase (IPMK); sequentially phosphorylates Ins(1,4,5)P3 to form Ins(1,3,4,5,6)P5; also has diphosphoinositol polyphosphate synthase activity; regulates arginine-, phosphate-, and nitrogen-responsive genes
	CAGL0B00770g	-1.17442043547571	AUT4	Ortholog(s) have L-amino acid transmembrane transporter activity, role in L-alpha-amino acid transmembrane transport, amino acid transmembrane export from vacuole and integral component of fungal-type vacuolar membrane localization	CR_04610C		Ortholog of a S. cerevisiae Atg22; a vacuolar integral membrane protein required for efflux of amino acids during autophagic body breakdown in the vacuole; possibly an essential gene, disruptants not obtained by UAU1 method	YCL038C	ATG22	Vacuolar integral membrane protein required for efflux of amino acids; required for efflux of amino acids during autophagic body breakdown in the vacuole; null mutation causes a gradual loss of viability during starvation
	CAGL0D05280g	-1.0994575163465		Ortholog(s) have sulfite reductase (NADPH) activity, role in sulfate assimilation and cytosol, sulfite reductase complex (NADPH) localization	C2_09140C	MET10	Sulfite reductase; role in sulfur amino acid metabolism; induced by human whole blood or PMNs; Hog1-induced; possibly adherence-induced; flow model, Spider model, F-12/CO2 biofilm induced	YFR030W	MET10	Subunit alpha of assimilatory sulfite reductase; complex converts sulfite into sulfide
	CAGL0J08316g	-1.09047239594702		Ortholog(s) have homoserine O-acetyltransferase activity, role in homoserine metabolic process, methionine biosynthetic process, regulation of DNA methylation and cytosol localization	CR_02170W	MET2	Homoserine acetyltransferase; Hap43p-, Gcn4p-regulated; macrophage/pseudohyphal-repressed; not highly biofilm induced, in contrast to many sulfur amino acid metabolic genes; no human or murine homolog; virulence-group-correlated expression	YNL277W	MET2	L-homoserine-O-acetyltransferase; catalyzes the conversion of homoserine to O-acetyl homoserine which is the first step of the methionine biosynthetic pathway
	CAGL0L02475g	-1.06750116669523	GCN4	bZIP domain-containing protein	C2_09940W	GCN4	bZIP transcription factor; amino acid control response; required for Efg1-dependent pseudohyphal induction by amino acid starvation, not by serum; human whole blood and PMN induced; required for biofilm formation; Spider biofilm induced	YEL009C	GCN4	bZIP transcriptional activator of amino acid biosynthetic genes; activator responds to amino acid starvation; expression is tightly regulated at both the transcriptional and translational levels
	CAGL0K04367g	-1.04951686320713		Ortholog(s) have L-methionine secondary active transmembrane transporter activity, role in cysteine transport, methionine import and fungal-type vacuole, plasma membrane localization	C1_11870W	MUP1	Putative high affinity methionine permease; alkaline upregulated by Rim101; Spider biofilm induced	YGR055W	MUP1	High affinity methionine permease; integral membrane protein with 13 putative membrane-spanning regions; also involved in cysteine uptake
	CAGL0M06985g	-1.04646729071837		Ortholog(s) have L-cystine transmembrane transporter activity, role in L-cystine transport and endosome, fungal-type vacuole, plasma membrane localization				YCR075C	ERS1	Protein involved in cystine transport; localizes to the vacuole, plasma membrane and endosome; similarity to human cystinosin, a H(+)-driven transporter involved in L-cystine export from lysosomes and implicated in the disease cystinosis; contains seven transmembrane domains; mutation is functionally complemented by human CTNS
	CAGL0M12386g	1.00471038848141		Ortholog(s) have role in isoleucine biosynthetic process, mitochondrial genome maintenance, mitochondrial translation and mitochondrial matrix localization	C1_06900C	MMD1	Mitochondrial protein; possibly required for transamination of isoleucine; macrophage-downregulated protein abundance; rat catheter and Spider biofilm repressed	YIL051C	MMF1	Mitochondrial protein required for transamination of isoleucine; but not of valine or leucine; may regulate specificity of branched-chain transaminases Bat1p and Bat2p; induction of expression in response to stress is mediated by a Hog1p-regulated antisense RNA and gene looping; interacts genetically with mitochondrial ribosomal protein genes; MMF1 has a paralog, HMF1, that arose from the whole g…
	CAGL0M07876g	1.01277565069223	MDE1	Ortholog(s) have methylthioribulose 1-phosphate dehydratase activity, role in L-methionine salvage from methylthioadenosine and cytosol, nucleus localization	C5_02820C		Ortholog(s) have methylthioribulose 1-phosphate dehydratase activity, role in L-methionine salvage from methylthioadenosine and cytosol, nucleus localization	YJR024C	MDE1	5'-methylthioribulose-1-phosphate dehydratase; acts in the methionine salvage pathway; potential Smt3p sumoylation substrate; expression downregulated by caspofungin and deletion mutant is caspofungin resistant
	CAGL0I05016g	1.01583246171347	TRP2	Putative anthranilate synthase component I; protein abundance increased in ace2 mutant cells	CR_01590C	TRP2	Putative anthranilate synthase with a predicted role in tryptophan biosynthesis; regulated by Gcn2p and Gcn4p	YER090W	TRP2	Anthranilate synthase; catalyzes the initial step of tryptophan biosynthesis, forms multifunctional hetero-oligomeric anthranilate synthase:indole-3-glycerol phosphate synthase enzyme complex with Trp3p
	CAGL0B00286g	1.02749317463127		Ortholog(s) have L-serine ammonia-lyase activity, L-threonine ammonia-lyase activity, role in L-serine catabolic process, threonine catabolic process and mitochondrial nucleoid localization	C3_06280W		Catabolic L-serine (L-threonine) deaminase;, catalyzes degradation of L-serine and L-threonine; required to use serine or threonine as a sole nitrogen source; Spider biofilm repressed	YCL064C	CHA1	Catabolic L-serine (L-threonine) deaminase; catalyzes the degradation of both L-serine and L-threonine; required to use serine or threonine as the sole nitrogen source, transcriptionally induced by serine and threonine
	CAGL0E06468g	1.03208774387992		Ortholog(s) have L-arginine transmembrane transporter activity, L-glutamine transmembrane transporter activity and L-histidine transmembrane transporter activity, more				YKL146W	AVT3	Vacuolar transporter; exports large neutral amino acids from the vacuole; member of a family of seven S. cerevisiae genes (AVT1-7) related to vesicular GABA-glycine transporters
	CAGL0K07788g	1.04141125567219		Ortholog(s) have L-aminoadipate-semialdehyde dehydrogenase activity, role in lysine biosynthetic process via aminoadipic acid, negative regulation of lysine biosynthetic process via aminoadipic acid and cytosol localization	C1_02820W	LYS2	Heterodimeric alpha-aminoadipate reductase large subunit; lysine biosynthesis; predicted binding sites for AMP and alpha-aminoadipate; inhibited by lys or thialysine; regulated by Gcn2 and Gcn4; Spider biofilm induced, flow model repressed	YBR115C	LYS2	Alpha aminoadipate reductase; catalyzes the reduction of alpha-aminoadipate to alpha-aminoadipate 6-semialdehyde, which is the fifth step in biosynthesis of lysine; activation requires posttranslational phosphopantetheinylation by Lys5p
	CAGL0H03641g	1.04436251715346		Ortholog(s) have cytosol, nucleus localization	C2_07140W		Putative 3-phosphoserine phosphatase; induced by benomyl or in azole-resistant strain that overexpresses MDR1; early-stage flow model biofilm induced; Spider biofilm repressed	YNL010W	YNL010W	Putative protein of unknown function; similar to phosphoserine phosphatases; green fluorescent protein (GFP)-fusion protein localizes to the cytoplasm and nucleus; homozygous diploid mutant shows an increase in glycogen accumulation
	CAGL0K10978g	1.05456856631133		Ortholog(s) have homoaconitate hydratase activity, role in lysine biosynthetic process via aminoadipic acid and mitochondrion localization	C4_04410C	LYS4	Homoaconitase; regulated by Gcn4, Gcn2; induced in response to amino acid starvation (3-AT); induced by human whole blood or PMNs; Hap43-repressed; flow model and Spider biofilm repressed	YDR234W	LYS4	Homoaconitase; catalyzes the conversion of homocitrate to homoisocitrate, which is a step in the lysine biosynthesis pathway
	CAGL0A00363g	1.0630939115761		Ortholog(s) have 3-isopropylmalate dehydratase activity, role in leucine biosynthetic process and cytoplasmic stress granule, cytosol localization	CR_00360C	LEU1	3-isopropylmalate dehydratase; antigenic in humans; repressed in hyphae; alkaline repressed; upregulated by human whole blood or PMNs; regulated by Sef1, Sfu1, and Hap43; rat catheter biofilm induced, Spider biofilm repressed	YGL009C	LEU1	Isopropylmalate isomerase; catalyzes the second step in the leucine biosynthesis pathway
	CAGL0L06842g	1.09218352148726	THI3	Ortholog(s) have RNA polymerase II activating transcription factor binding activity and role in positive regulation of thiamine biosynthetic process, positive regulation of transcription from RNA polymerase II promoter				YDL080C	THI3	Regulatory protein that binds Pdc2p and Thi2p transcription factors; activates thiamine biosynthesis transcription factors Pdc2p and Thi2p by binding to them, but releases and de-activates them upon binding to thiamine pyrophosphate (TPP), the end product of the pathway; has similarity to decarboxylases but enzymatic activity is not detected
	CAGL0F00253g	1.09961004124095		Ortholog(s) have anthranilate synthase activity, indole-3-glycerol-phosphate lyase activity, phosphoribosylanthranilate isomerase activity, role in tryptophan biosynthetic process and cytosol localization
	CAGL0C03443g	1.13295817374004	LYS9	Putative saccharopine dehydrogenase	C3_06590W	LYS9	Saccharopine dehydrogenase; lysine biosynthesis; soluble protein in hyphae; amphotericin B repressed; Gcn4-regulated; colony morphology-related gene regulation by Ssn6; protein present in exponential and stationary growth phase yeast	YNR050C	LYS9	Saccharopine dehydrogenase (NADP+, L-glutamate-forming); catalyzes the formation of saccharopine from alpha-aminoadipate 6-semialdehyde, the seventh step in lysine biosynthesis pathway; exhibits genetic and physical interactions with TRM112
	CAGL0A01760g	1.15807898840074		Ortholog(s) have arginine-tRNA ligase activity, role in arginyl-tRNA aminoacylation and mitochondrion localization	C1_01530C		Putative tRNA-Arg synthetase; essential; genes encoding ribosomal subunits, translation factors, and tRNA synthetases are downregulated upon phagocytosis by murine macrophage; downregulated by growth in the mouse cecum	YDR341C	YDR341C	Arginyl-tRNA synthetase; the authentic, non-tagged protein is detected in highly purified mitochondria in high-throughput studies; YDR341C has a paralog, MSR1, that arose from the whole genome duplication
	CAGL0G02585g	1.17395646318957	LYS12	Homo-isocitrate dehydrogenase	CR_01400W	LYS12	Homoisocitrate dehydrogenase; catalyzes 4th step in the alpha-aminoadipate pathway of lysine biosynthesis; clade-associated gene expression; protein level decreases in stationary phase cultures; Spider biofilm repressed	YIL094C	LYS12	Homo-isocitrate dehydrogenase; an NAD-linked mitochondrial enzyme required for the fourth step in the biosynthesis of lysine, in which homo-isocitrate is oxidatively decarboxylated to alpha-ketoadipate
	CAGL0D03036g	1.17498170520533		Ortholog(s) have L-glutamine transmembrane transporter activity, L-isoleucine transmembrane transporter activity, L-tyrosine transmembrane transporter activity	C7_00230W		Putative vacuolar transporter of large neutral amino acids; possibly transcriptionally regulated upon hyphal formation; not the true Avt1 ortholog of S. cerevisiae	YJR001W	AVT1	Vacuolar transporter; imports large neutral amino acids into the vacuole; member of a family of seven S. cerevisiae genes (AVT1-7) related to vesicular GABA-glycine transporters
	CAGL0L00759g	1.21492418647115	HIS1	ATP phosphoribosyltransferase; protein abundance increased in ace2 mutant cells
	CAGL0J03762g	1.22194628367429	MET7	Ortholog(s) have tetrahydrofolylpolyglutamate synthase activity, role in one-carbon metabolic process, regulation of DNA methylation and cytosol, endoplasmic reticulum, mitochondrion, nucleus localization	C2_04380C		Ortholog(s) have tetrahydrofolylpolyglutamate synthase activity, role in one-carbon metabolic process, regulation of DNA methylation and cytosol, endoplasmic reticulum, mitochondrion, nucleus localization	YOR241W	MET7	Folylpolyglutamate synthetase; catalyzes extension of the glutamate chains of the folate coenzymes, required for methionine synthesis and for maintenance of mitochondrial DNA; protein abundance increases in response to DNA replication stress
	CAGL0M12837g	1.23312336580641		Ortholog(s) have alpha-ketoglutarate reductase activity, phosphoglycerate dehydrogenase activity, role in serine family amino acid biosynthetic process and cytosol localization				YIL074C	SER33	3-phosphoglycerate dehydrogenase and alpha-ketoglutarate reductase; 3PG dehydrogenase that catalyzes the first step in serine and glycine biosynthesis; also functions as an alpha-ketoglutarate reductase, converting alpha-ketoglutarate to D-2-hydroxyglutarate (D-2HG); localizes to the cytoplasm; SER33 has a paralog, SER3, that arose from the whole genome duplication
	CAGL0M12188g	1.27048715521375		Ortholog(s) have glycine dehydrogenase (decarboxylating) activity, role in glycine catabolic process, one-carbon metabolic process, protein lipoylation and mitochondrion localization	C1_13680C	GCV3	Glycine decarboxylase, subunit H; protein level decrease in stationary phase cultures	YAL044C	GCV3	H subunit of the mitochondrial glycine decarboxylase complex; glycine decarboxylase is required for the catabolism of glycine to 5,10-methylene-THF; also required for all protein lipoylation; expression is regulated by levels of 5,10-methylene-THF
	CAGL0H06963g	1.28555339758936		Ortholog(s) have cytosol, nucleus localization	C2_08530C		Ortholog(s) have cytosol, nucleus localization	YML096W	YML096W	Putative protein with similarity to asparagine synthetases; green fluorescent protein (GFP)-fusion protein localizes to the cytoplasm; YML096W is not an essential gene and partially overlaps the verified gene RAD10
	CAGL0B00902g	1.30758651048495	HIS4	Phosphoribosyl-AMP cyclohydrolase; phosphoribosyl-ATP pyrophosphatase; histidinol dehydrogenase	C4_00140C	HIS4	Multifunctional enzyme that catalyzes three steps of histidine biosynthesis, with phosphoribosyl-AMP cyclohydrolase, phosphoribosyl-ATP diphosphatase, and histidinol dehydrogenase activities; required for wild-type adhesion to human calls	YCL030C	HIS4	Multifunctional enzyme containing phosphoribosyl-ATP pyrophosphatase; phosphoribosyl-AMP cyclohydrolase, and histidinol dehydrogenase activities; catalyzes the second, third, ninth and tenth steps in histidine biosynthesis
	CAGL0I10010g	1.35966735365373		Ortholog(s) have SNARE binding, chaperone binding activity and role in amino acid transport, intracellular protein transport, protein folding, protein localization to nucleus, regulation of pH, retrograde transport, endosome to Golgi				YGR142W	BTN2	v-SNARE binding protein; facilitates specific protein retrieval from a late endosome to the Golgi; modulates arginine uptake, possible role in mediating pH homeostasis between the vacuole and plasma membrane H(+)-ATPase; contributes to prion curing; preferentially expressed after severe ethanol stress
	CAGL0M06017g	1.44393307615847		Ortholog(s) have prephenate dehydrogenase (NADP+) activity, role in tyrosine biosynthetic process and cytosol localization	C4_01880W	TYR1	Putative prepephenate dehydrogenase; enzyme of tyrosine biosynthesis; fungal-specific (no human or murine homolog)	YBR166C	TYR1	Prephenate dehydrogenase involved in tyrosine biosynthesis; expression is dependent on phenylalanine levels
	CAGL0K12232g	1.44433115598287		Ortholog(s) have chorismate mutase activity, role in aromatic amino acid family biosynthetic process, sporocarp development involved in sexual reproduction and cytosol, nucleus localization
	CAGL0I06578g	1.45876073146387	YEY2	Ortholog(s) have 2-aminoadipate transaminase activity and cytoplasm, nucleus localization	C6_00210W		Putative 2-aminoadipate transaminase; rat catheter and Spider biofilm repressed	YER152C	YER152C	Protein with 2-aminoadipate transaminase activity; shares amino acid similarity with the aminotransferases Aro8p and Aro9p; YER152C is not an essential gene
	CAGL0I01276g	1.47674234139642		Ortholog(s) have cytoplasm, nucleus localization	CR_09010C		Putative cystathionine gamma-synthase; decreased levels in stationary phase cultures; Hog1p-induced; Gcn4p-regulated	YHR112C	YHR112C	Protein of unknown function; localizes to the cytoplasm and nucleus; overexpression affects protein trafficking through the endocytic pathway
	CAGL0J04554g	1.48185475498012		Has domain(s) with predicted catalytic activity, pyridoxal phosphate binding, transaminase activity and role in biosynthetic process, cellular amino acid metabolic process
	CAGL0K00825g	1.50827514503853		Has domain(s) with predicted phosphatase activity, phosphoserine phosphatase activity and role in L-serine biosynthetic process, metabolic process
	CAGL0C04917g	1.55237598117665		Ortholog(s) have carbamoyl-phosphate synthase (glutamine-hydrolyzing) activity, role in arginine biosynthetic process and carbamoyl-phosphate synthase complex, mitochondrion localization	CR_01330W	CPA2	Putative arginine-specific carbamoylphosphate synthetase; protein enriched in stationary phase yeast cultures; rat catheter biofilm induced; Spider biofilm induced	YJR109C	CPA2	Large subunit of carbamoyl phosphate synthetase; carbamoyl phosphate synthetase catalyzes a step in the synthesis of citrulline, an arginine precursor
	CAGL0D03894g	1.59886618433546	PRO1	Putative gamma-glutamyl phosphate reductase				YHR033W	YHR033W	Putative protein of unknown function; epitope-tagged protein localizes to the cytoplasm; YHR033W has a paralog, PRO1, that arose from the whole genome duplication
	CAGL0H03795g	1.6290212027599	LEU2	3-isopropylmalate dehydrogenase
	CAGL0G01254g	1.69629476401586	ARO8	Putative aromatic aminotransferase I
	CAGL0I04994g	1.80207914112461	MET6	5-methyltetrahydropteroyltriglutamate homocysteine methyltransferase; protein abundance increased in ace2 mutant cells	CR_01620C	MET6	Essential 5-methyltetrahydropteroyltriglutamate-homocysteine methyltransferase (cobalamin-independent methionine synthase); antigenic in murine/human systemic infection; heat shock, estrogen, GCN-induced; Spider biofilm repressed	YER091C	MET6	Cobalamin-independent methionine synthase; involved in methionine biosynthesis and regeneration; requires a minimum of two glutamates on the methyltetrahydrofolate substrate, similar to bacterial metE homologs
	CAGL0M11242g	1.80795537396487		Ortholog(s) have carbonyl reductase (NADPH) activity, serine 3-dehydrogenase activity and cytosol, nucleus, ribosome localization	C4_01510W		Ortholog(s) have carbonyl reductase (NADPH) activity, serine 3-dehydrogenase activity and cytosol, nucleus, ribosome localization	YMR226C	YMR226C	NADP(+)-dependent serine dehydrogenase and carbonyl reductase; acts on serine, L-allo-threonine, and other 3-hydroxy acids; green fluorescent protein fusion protein localizes to the cytoplasm and nucleus; may interact with ribosomes, based on co-purification experiments
	CAGL0G02937g	1.89366541168894		Ortholog(s) have pyruvate decarboxylase activity and role in L-phenylalanine catabolic process, aromatic amino acid family catabolic process to alcohol via Ehrlich pathway, ethanol metabolic process, tryptophan catabolic process				YGR087C	PDC6	Minor isoform of pyruvate decarboxylase; decarboxylates pyruvate to acetaldehyde, involved in amino acid catabolism; transcription is glucose- and ethanol-dependent, and is strongly induced during sulfur limitation
	CAGL0E05104g	1.93104094436889		Ortholog(s) have enzyme activator activity, holo-[acyl-carrier-protein] synthase activity and role in peptidyl-serine phosphopantetheinylation, protein-cofactor linkage	CR_04890W	LYS5	Phosphopantetheinyl transferase; enzyme of lysine biosynthesis; modifies, and thereby activates, Lys2p alpha-aminoadipate reductase; functional homolog of S. cerevisiae Lys5p	YGL154C	LYS5	Phosphopantetheinyl transferase involved in lysine biosynthesis; converts inactive apo-form of Lys2p (alpha-aminoadipate reductase) into catalytically active holo-form by posttranslational addition of phosphopantetheine
	CAGL0J07062g	2.00569785395304		Ortholog(s) have arginase activity, manganese ion binding, ornithine carbamoyltransferase inhibitor activity, zinc ion binding activity	C5_04490C	CAR1	Arginase; arginine catabolism; transcript regulated by Nrg1, Mig1, Tup1; colony morphology-related regulation by Ssn6; alkaline induced; protein decreased in stationary phase; sumoylation target; flow model biofilm induced	YPL111W	CAR1	Arginase, catabolizes arginine to ornithine and urea; expression responds to both induction by arginine and nitrogen catabolite repression; disruption decreases production of carcinogen ethyl carbamate during wine fermentation and also enhances freeze tolerance
	CAGL0C05115g	2.07529356340749	ARG1	Argininosuccinate synthetase	CR_00620C	ARG1	Argininosuccinate synthase; arginine synthesis; Gcn4, Rim101 regulated; induced by amino acid starvation (3-AT), benomyl treatment; stationary phase enriched protein; repressed in alkalinizing medium; rat catheter, Spider biofilm induced	YOL058W	ARG1	Arginosuccinate synthetase; catalyzes the formation of L-argininosuccinate from citrulline and L-aspartate in the arginine biosynthesis pathway; potential Cdc28p substrate
	CAGL0M00176g	2.07756796676369	BAT2	Ortholog(s) have L-isoleucine transaminase activity, L-leucine transaminase activity, L-valine transaminase activity	C2_04230W	BAT21	Putative branched chain amino acid aminotransferase; regulated by Gcn4, Gcn2; induced in response to amino acid starvation (3-aminotriazole treatment); early-stage flow model biofilm formation	YJR148W	BAT2	Cytosolic branched-chain amino acid (BCAA) aminotransferase; preferentially involved in BCAA catabolism; homolog of murine ECA39; highly expressed during stationary phase and repressed during logarithmic phase; BAT2 has a paralog, BAT1, that arose from the whole genome duplication
	CAGL0M00330g	2.09972245429369	HOM6	Ortholog(s) have homoserine dehydrogenase activity, role in homoserine biosynthetic process, methionine biosynthetic process, threonine biosynthetic process and cytoplasm, nucleus localization	C1_02620C	HOM6	Putative homoserine dehydrogenase; Gcn4-regulated; induced by amino acid starvation (3-ATtreatment); macrophage-induced protein; protein level decreases in stationary phase cultures; flow model biofilm repressed	YJR139C	HOM6	Homoserine dehydrogenase (L-homoserine:NADP oxidoreductase); dimeric enzyme that catalyzes the third step in the common pathway for methionine and threonine biosynthesis; enzyme has nucleotide-binding, dimerization and catalytic regions
	CAGL0F01749g	2.20419047481663		Putative serine hydroxymethyltransferase; protein differentially expressed in azole resistant strain	C6_03760C	SHM2	Cytoplasmic serine hydroxymethyltransferase; complements glycine auxotrophy of S. cerevisiae shm1 shm2 gly1-1 mutant; antigenic; farnesol-upregulated in biofilm; stationary-phase enriched protein; rat catheter and Spider biofilm repressed	YLR058C	SHM2	Cytosolic serine hydroxymethyltransferase; converts serine to glycine plus 5,10 methylenetetrahydrofolate; major isoform involved in generating precursors for purine, pyrimidine, amino acid, and lipid biosynthesis
Purine and pyrimidine metabolism	CAGL0E04642g	-1.20132307598844		Has domain(s) with predicted ATP binding, nucleoside-triphosphatase activity, nucleotide binding activity
	CAGL0H09064g	-1.19638669724465	FUR1	Putative uracil phosphoribosyltransferase	C5_03390C	FUR1	Uracil phosphoribosyltransferase; predicted tetrameric enzyme of pyrimidine salvage; mutations associated with flucytosine resistance in clade I clinical isolates; flucytosine, macrophage-induced protein; levels decrease in stationary phase	YHR128W	FUR1	Uracil phosphoribosyltransferase; synthesizes UMP from uracil; involved in the pyrimidine salvage pathway
	CAGL0G04147g	-1.18760664811023		Ortholog(s) have bis(5'-nucleosyl)-tetraphosphatase (asymmetrical) activity, nucleoside-triphosphatase activity, role in adenosine catabolic process and cytosol, mitochondrion, nucleus localization	C3_06340W	HNT2	Putative dinucleoside triphosphate hydrolase; induced upon low-level peroxide stress	YDR305C	HNT2	Dinucleoside triphosphate hydrolase; has similarity to the tumor suppressor FHIT and belongs to the histidine triad (HIT) superfamily of nucleotide-binding proteins
	CAGL0M12881g	-1.15355055435559		Ortholog(s) have dihydroorotate dehydrogenase activity, role in 'de novo' UMP biosynthetic process and mitochondrion localization
	CAGL0B03069g	-1.10151269418002	TAL1	Putative transaldolase; expression upregulated in biofilm vs planktonic cell culture	CR_03720W	TAL1	Transaldolase; protein present in exponential and stationary growth phase yeast cultures; oxidative stress-induced via Cap1; induced by nitric oxide independent of Yhb1p; sumoylation target; rat catheter biofilm repressed	YLR354C	TAL1	Transaldolase, enzyme in the non-oxidative pentose phosphate pathway; converts sedoheptulose 7-phosphate and glyceraldehyde 3-phosphate to erythrose 4-phosphate and fructose 6-phosphate; TAL1 has a paralog, NQM1, that arose from the whole genome duplication
	CAGL0M01694g	-1.03761441270603		Ortholog(s) have formate-tetrahydrofolate ligase activity, methenyltetrahydrofolate cyclohydrolase activity, methylenetetrahydrofolate dehydrogenase (NADP+) activity	CR_07010W	MIS11	Predicted mitochondrial C1-tetrahydrofolate synthase precursor; putative protein of glycine catabolism; repressed by Efg1; fluconazole-induced; stationary phase enriched protein; rat catheter and Spider biofilm repressed	YBR084W	MIS1	Mitochondrial C1-tetrahydrofolate synthase; involved in interconversion between different oxidation states of tetrahydrofolate (THF); provides activities of formyl-THF synthetase, methenyl-THF cyclohydrolase, and methylene-THF dehydrogenase
	CAGL0I04444g	1.04645212216422		Ortholog(s) have phosphoribosylaminoimidazolesuccinocarboxamide synthase activity, role in 'de novo' IMP biosynthetic process, adenine biosynthetic process, fumarate metabolic process and cytosol, nucleus localization	CR_00510C	ADE1	Phosphoribosylaminoimadazole succinocarboxamide synthetase, enzyme of adenine biosynthesis; not induced in GCN response, unlike the S. cerevisiae ortholog; fungal-specific (no human or murine homolog); levels decrease in stationary phase	YAR015W	ADE1	N-succinyl-5-aminoimidazole-4-carboxamide ribotide synthetase; required for 'de novo' purine nucleotide biosynthesis; red pigment accumulates in mutant cells deprived of adenine; protein abundance increases in response to DNA replication stress
	CAGL0C04983g	1.04796929483111	ADO1	Putative adenosine kinase; expression upregulated in biofilm vs planktonic cell culture	C6_03080C	ADO1	Adenosine kinase; heterozygous null mutant is resistant to cordycepin in C. albicans fitness test; ketoconazole-induced; protein level decrease in stationary phase cultures; sumoylation target; Spider biofilm repressed	YJR105W	ADO1	Adenosine kinase; required for the utilization of S-adenosylmethionine (AdoMet); may be involved in recycling adenosine produced through the methyl cycle
	CAGL0F00429g	1.05239964675735		Ortholog(s) have GTP diphosphatase activity, ITP diphosphatase activity, UTP diphosphatase activity, XTP diphosphatase activity, dATP pyrophosphohydrolase activity and dCTP diphosphatase activity, more	C5_03860W	HAM1	Putative deoxyribonucleoside triphosphate pyrophosphohydrolase; caspofungin repressed; regulated by Gcn2p and Gcn4p	YJR069C	HAM1	Nucleoside triphosphate pyrophosphohydrolase; active against various substrates including ITP, dITP and XTP; mediates exclusion of non canonical purines, pyrimidines from dNTP pools; functions with YJL055W to mediate resistance to 5-FU; specifically reduces the incorporation of 5-FU into RNA without affecting uptake or incorporation of uracil into RNA; protein abundance increases in response to D…
	CAGL0H07887g	1.23995243438203		Ortholog(s) have phosphoribosylamine-glycine ligase activity, phosphoribosylformylglycinamidine cyclo-ligase activity	C1_07890C	ADE5,7	Phosphoribosylamine-glycine ligase and phosphoribosylformylglycinamidine cyclo-ligase; interacts with Vps34p; required for hyphal growth and virulence; flucytosine induced; not induced in GCN response, in contrast to S. cerevisiae ortholog	YGL234W	ADE5,7	Enzyme of the 'de novo' purine nucleotide biosynthetic pathway; contains aminoimidazole ribotide synthetase and glycinamide ribotide synthetase activities
	CAGL0F08503g	1.29658342111212		Ortholog(s) have GTP cyclohydrolase I activity, role in folic acid-containing compound biosynthetic process and cytosol, nucleus localization	C5_04720C		Ortholog(s) have GTP cyclohydrolase I activity, role in folic acid-containing compound biosynthetic process and cytosol, nucleus localization	YGR267C	FOL2	GTP-cyclohydrolase I, catalyzes first step in folic acid biosynthesis; human homolog GCH1 is implicated in dopa-responsive dystonia (DRD), and can complement yeast null mutant
	CAGL0G02189g	1.46463025024267	MTD1	Putative methylenetetrahydrofolate dehydrogenase (NAD+); protein abundance increased in ace2 mutant cells	C4_04720W		Ortholog(s) have methylenetetrahydrofolate dehydrogenase (NAD+) activity, role in folic acid-containing compound biosynthetic process, one-carbon metabolic process, purine nucleobase biosynthetic process and cytosol, nucleus localization	YKR080W	MTD1	NAD-dependent 5,10-methylenetetrahydrafolate dehydrogenase; plays a catalytic role in oxidation of cytoplasmic one-carbon units; expression is regulated by Bas1p and Bas2p, repressed by adenine, and may be induced by inositol and choline
	CAGL0H09218g	1.57876034843152	SDT1	Ortholog(s) have nucleotidase activity, role in pyrimidine nucleobase metabolic process and cytosol, nucleus localization	C5_04360C		Possible pyrimidine 5' nucleotidase; protein present in exponential and stationary growth phase yeast cultures; Hap43p-repressed gene	YGL224C	SDT1	Pyrimidine nucleotidase; responsible for production of nicotinamide riboside and nicotinic acid riboside; overexpression suppresses the 6-AU sensitivity of transcription elongation factor S-II, as well as resistance to other pyrimidine derivatives; SDT1 has a paralog, PHM8, that arose from the whole genome duplication
	CAGL0K11418g	1.5924427148903	ADK1	Putative adenylate kinase; protein differentially expressed in azole resistant strain	C6_01910W	ADK1	Putative adenylate kinase; repressed in hyphae; macrophage-induced protein; adenylate kinase release used as marker for cell lysis; possibly essential (UAU1 method); flow model biofilm induced; rat catheter and Spider biofilm repressed	YDR226W	ADK1	Adenylate kinase, required for purine metabolism; localized to the cytoplasm and the mitochondria; lacks cleavable signal sequence; protein abundance increases in response to DNA replication stress; mutations affecting Adk1p catalytic activity deregulate expression of phosphate utilization genes PHO5 and PHO84; human homolog AK1 can complement yeast adk1 mutant
	CAGL0K00913g	1.67165371753633		Ortholog(s) have formate-tetrahydrofolate ligase activity, methenyltetrahydrofolate cyclohydrolase activity, methylenetetrahydrofolate dehydrogenase (NADP+) activity, single-stranded DNA binding activity				YGR204W	ADE3	Cytoplasmic trifunctional enzyme C1-tetrahydrofolate synthase; involved in single carbon metabolism and required for biosynthesis of purines, thymidylate, methionine, and histidine; null mutation causes auxotrophy for adenine and histidine
	CAGL0M13497g	1.7564747225173		Ortholog(s) have 4-amino-4-deoxychorismate lyase activity, role in folic acid biosynthetic process and cytoplasm localization	C2_02700C		Ortholog(s) have 4-amino-4-deoxychorismate lyase activity, role in folic acid biosynthetic process and cytoplasm localization	YMR289W	ABZ2	Aminodeoxychorismate lyase (4-amino-4-deoxychorismate lyase); catalyzes the third step in para-aminobenzoic acid biosynthesis; involved in folic acid biosynthesis
	CAGL0K05467g	1.82495545613795	CDC21	Putative thymidylate synthase	C2_05190W	CDC21	Putative thymidylate synthase; flucytosine induced; rat catheter biofilm repressed; Spider biofilm repressed	YOR074C	CDC21	Thymidylate synthase; required for de novo biosynthesis of pyrimidine deoxyribonucleotides; expression is induced at G1/S; human homolog TYMSOS can complement yeast cdc21 temperature-sensitive mutant at restrictive temperature
	CAGL0K05027g	1.85962729433659		Ortholog(s) have DNA replication origin binding, adenylosuccinate synthase activity, sulfinylpropanyl adenylate synthase activity and role in 'de novo' AMP biosynthetic process, cellular response to cadmium ion, fumarate metabolic process	C1_09640W	ADE12	Adenylosuccinate synthase; upregulated in biofilm; decreased expression in hyphae vs yeast-form cells; not induced during GCN response, in contrast to S. cerevisiae ADE12, which is induced by Gcn4p; stationary phase-enriched protein	YNL220W	ADE12	Adenylosuccinate synthase; catalyzes the first step in synthesis of adenosine monophosphate from inosine 5'monophosphate during purine nucleotide biosynthesis; exhibits binding to single-stranded autonomously replicating (ARS) core sequence
	CAGL0L05676g	1.88959085587073		Ortholog(s) have GMP synthase (glutamine-hydrolyzing) activity, aspartate carbamoyltransferase activity, carbamoyl-phosphate synthase (glutamine-hydrolyzing) activity	CR_07050C	URA2	Putative bifunctional carbamoylphosphate synthetase-aspartate transcarbamylase; flucytosine induced; macrophage/pseudohyphal-induced; 5'-UTR intron; flow model biofilm repressed	YJL130C	URA2	Bifunctional carbamoylphosphate synthetase/aspartate transcarbamylase; catalyzes the first two enzymatic steps in the de novo biosynthesis of pyrimidines; both activities are subject to feedback inhibition by UTP
Autophagy	CAGL0M01848g	-2.32086791093827		Ortholog(s) have role in lysosomal microautophagy, signal transduction and EGO complex, fungal-type vacuole membrane, late endosome membrane localization				YBR077C	SLM4	Component of the EGO and GSE complexes; essential for integrity and function of EGO; EGO is involved in the regulation of microautophagy and GSE is required for proper sorting of amino acid permease Gap1p; gene exhibits synthetic genetic interaction with MSS4
	CAGL0B02860g	-1.75120846290313		Ortholog(s) have role in macroautophagy, mitophagy and mitochondrion localization				YLR356W	ATG33	Mitochondrial mitophagy-specific protein; required primarily for mitophagy induced at post-log phase; not required for other types of selective autophagy or macroautophagy; conserved within fungi, but not in higher eukaryotes; ATG33 has a paralog, SCM4, that arose from the whole genome duplication
	CAGL0H06545g	-1.69990296326034		Ortholog(s) have role in mitophagy and integral component of mitochondrial outer membrane localization				YIL146C	ATG32	Mitochondrial outer membrane protein required to initiate mitophagy; recruits the autophagy adaptor protein Atg11p and the ubiquitin-like protein Atg8p to the mitochondrial surface to initiate mitophagy, the selective vacuolar degradation of mitochondria in response to starvation; can promote pexophagy when placed ectopically in the peroxisomal membrane; regulates mitophagy and ethanol production…
	CAGL0L06006g	-1.69483955289746		Ortholog(s) have protein serine/threonine kinase activity	C4_04450C	ATG1	Putative protein serine/threonine kinase; predicted role in vesicle formation in autophagy and the cytoplasm-to-vacuole targeting (Cvt) pathway; Spider biofilm induced	YGL180W	ATG1	Protein serine/threonine kinase; required for vesicle formation in autophagy and the cytoplasm-to-vacuole targeting (Cvt) pathway; structurally required for phagophore assembly site formation; during autophagy forms a complex with Atg13p and Atg17p; essential for cell cycle progression from G2/M to G1 under nitrogen starvation
	CAGL0H05841g	-1.62686254696845		Ortholog(s) have phosphatidylinositol-3,5-bisphosphate binding activity and role in CVT pathway, mitophagy, piecemeal microautophagy of nucleus, protein lipidation, protein localization to pre-autophagosomal structure, vesicle organization	C1_03330C		Ortholog(s) have phosphatidylinositol-3,5-bisphosphate binding activity and role in CVT pathway, mitophagy, piecemeal microautophagy of nucleus, protein lipidation, protein localization to pre-autophagosomal structure, vesicle organization	YPL100W	ATG21	Phosphoinositide binding protein; required for vesicle formation in the cytoplasm-to-vacuole targeting (Cvt) pathway; binds both phosphatidylinositol (3,5)-bisphosphate and phosphatidylinositol 3-phosphate; WD-40 repeat protein
	CAGL0A04675g	-1.56534058614408		Ortholog(s) have protein tag activity	C1_05700W	AUT7	Putative autophagosome protein; macrophage/pseudohyphal-repressed; alternatively spliced intron in 5' UTR; Spider biofilm induced	YBL078C	ATG8	Component of autophagosomes and Cvt vesicles; regulator of Atg1p, targets it to autophagosomes; binds the Atg1p-Atg13p complex, triggering its vacuolar degradation; unique ubiquitin-like protein whose conjugation target is lipid phosphatidylethanolamine (PE); Atg8p-PE is anchored to membranes, is involved in phagophore expansion, and may mediate membrane fusion during autophagosome formation; dec…
	CAGL0I02420g	-1.45352035504809		Ortholog(s) have Atg12 activating enzyme activity, Atg8 activating enzyme activity	CR_06730W	APG7	Ortholog(s) have Atg12 activating enzyme activity, Atg8 activating enzyme activity	YHR171W	ATG7	Autophagy-related protein and dual specificity member of the E1 family; mediates the attachment of Atg12p to Atg5p and Atg8p to phosphatidylethanolamine which are required steps in autophagosome formation; E1 enzymes are also known as ubiquitin-activating enzymes; involved in methionine restriction extension of chronological lifespan in an autophagy-dependent manner
	CAGL0J01001g	-1.41716262497783		Ortholog(s) have phosphatidylinositol-3-phosphate binding activity and role in CVT pathway, early endosome to Golgi transport, mitophagy, piecemeal microautophagy of nucleus	C2_01350C	SNX4	Putative sorting nexin; induced during the mating process	YJL036W	SNX4	Sorting nexin; involved in retrieval of late-Golgi SNAREs from post-Golgi endosomes to the trans-Golgi network and in cytoplasm to vacuole transport; contains a PX phosphoinositide-binding domain; forms complexes with Snx41p and with Atg20p
	CAGL0E00649g	-1.39838424848037		Ortholog(s) have magnesium-dependent protein serine/threonine phosphatase activity	CR_07770C	PTC6	Mitochondrial protein phosphatase of the Type 2C-related family (serine/threonine-specific), functional homolog of S. cerevisiae Ptc6p; mutant shows virulence defect	YCR079W	PTC6	Mitochondrial type 2C protein phosphatase (PP2C); has similarity to mammalian PP1Ks; involved in mitophagy; null mutant is sensitive to rapamycin and has decreased phosphorylation of the Pda1 subunit of pyruvate dehydrogenase
	CAGL0M02013g	-1.3970840728913		Ortholog(s) have role in late nucleophagy, macroautophagy, mitophagy, piecemeal microautophagy of nucleus and cytosol, nucleus, pre-autophagosomal structure localization				YPL166W	ATG29	Autophagy-specific protein; required for recruiting other ATG proteins to the pre-autophagosomal structure (PAS); interacts with Atg17p and localizas to the PAS in a manner interdependent with Atg17p and Cis1p; not conserved; relocalizes from nucleus to cytoplasmic foci upon DNA replication stress
	CAGL0J07304g	-1.38044767210652		Ortholog(s) have Atg8-specific protease activity	CR_03220C		Ortholog(s) have Atg8-specific protease activity	YNL223W	ATG4	Conserved cysteine protease required for autophagy; cleaves Atg8p to a form required for autophagosome and Cvt vesicle generation
	CAGL0J07634g	-1.37925291577081	SPO72	Ortholog(s) have phosphatidylinositol-3-phosphate binding activity and role in CVT pathway, autophagosome assembly, late nucleophagy, mitophagy, pexophagy, piecemeal microautophagy of nucleus, reticulophagy	C2_06010W	SPO72	Protein described as similar to S. cerevisiae sporulation protein; ortholog of S. cerevisiae Atg2, an autophagic vesicle formation protein; up-regulation associated with azole resistance; Spider biofilm induced	YNL242W	ATG2	Peripheral membrane protein required for autophagic vesicle formation; also required for vesicle formation during pexophagy and the cytoplasm-to-vaucole targeting (Cvt) pathway; involved in Atg9p cycling between the phagophore assembly site and mitochondria; contains an APT1 domain that binds phosphatidylinositol-3-phosphate; essential for cell cycle progression from G2/M to G1 under nitrogen sta…
	CAGL0I07051g	-1.28735064337414		Ortholog(s) have cyclin-dependent protein serine/threonine kinase regulator activity, role in positive regulation of macroautophagy and cyclin-dependent protein kinase holoenzyme complex localization	CR_07240C	CLG1	Putative cyclin-like protein; transcription is regulated upon yeast-hyphal switch	YGL215W	CLG1	Cyclin-like protein that interacts with Pho85p; has sequence similarity to G1 cyclins PCL1 and PCL2
	CAGL0F02145g	-1.18446291370398	PHM1	Ortholog(s) have role in lysosomal microautophagy, polyphosphate metabolic process, protein localization, vacuolar transport, vacuole fusion, non-autophagic	CR_03610C	VTC3	Putative polyphosphate synthetase; downregulated in core caspofungin response; Hog1p-induced; transcription is opaque-specific; fungal-specific (no human or murine homolog)	YFL004W	VTC2	Regulatory subunit of the vacuolar transporter chaperone (VTC) complex; involved in membrane trafficking, vacuolar polyphosphate accumulation, microautophagy and non-autophagic vacuolar fusion; VTC2 has a paralog, VTC3, that arose from the whole genome duplication
	CAGL0M07205g	-1.09676123489452		Ortholog(s) have role in cellular protein localization, piecemeal microautophagy of nucleus and nuclear envelope, nuclear periphery localization				YHR195W	NVJ1	Nuclear envelope protein; anchored to the nuclear inner membrane, that interacts with the vacuolar membrane protein Vac8p to promote formation of nucleus-vacuole junctions during piecemeal microautophagy of the nucleus (PMN)
	CAGL0B02101g	-1.08630546767513		Ortholog(s) have phosphatidylinositol-3,5-bisphosphate binding activity and role in macroautophagy, piecemeal microautophagy of nucleus	C4_05350W		Ortholog(s) have phosphatidylinositol-3,5-bisphosphate binding activity and role in macroautophagy, piecemeal microautophagy of nucleus	YGR223C	HSV2	Phosphatidylinositol 3,5-bisphosphate-binding protein; plays a role in micronucleophagy; belongs to the PROPPIN family of proteins; predicted to fold as a seven-bladed beta-propeller; displays punctate cytoplasmic localization
	CAGL0M02915g	-1.06423093057423		Ortholog(s) have role in pexophagy and peroxisome localization				YJL185C	ATG36	Pex3p interacting protein, required for pexophagy; interacts with Atg8p and Atg11p; mRNA is weakly cell cycle regulated, peaking in G2 phase; YJL185C is a non-essential gene
	CAGL0E04136g	1.00627261481625		Ortholog(s) have peptide alpha-N-acetyltransferase activity, role in N-terminal protein amino acid acetylation, macroautophagy and NatC complex localization	C3_02210C		Non-catalytic subunit of N-terminal acetyltransferase of the NatC type; flow model biofilm repressed	YEL053C	MAK10	Non-catalytic subunit of the NatC N-terminal acetyltransferase; required for replication of dsRNA virus; expression is glucose-repressible; human NatC ortholog, Naa35, requires co-expression of the human catalytic subunit, Naa30, to functionally complement the null allele
	CAGL0G09911g	1.12210647516185		Ortholog(s) have GTPase activator activity, role in macroautophagy, regulation of COPII vesicle coating and COPII vesicle coat, endoplasmic reticulum localization	C4_05690W	SEC23	Putative GTPase-activating protein; regulated upon yeast-hypha switch; Spider biofilm repressed	YPR181C	SEC23	GTPase-activating protein, stimulates the GTPase activity of Sar1p; component of the Sec23p-Sec24p heterodimer of the COPII vesicle coat, involved in ER to Golgi transport; substrate of Ubp3/Bre5 complex; ubiquitylated by Ub-ligase Rsp5p; proteasome-mediated degradation of Sec23p is regulated by Cdc48p
	CAGL0F03201g	1.29407894527144		Ortholog(s) have protein C-terminal leucine carboxyl O-methyltransferase activity, role in C-terminal protein methylation, cellular protein complex assembly, regulation of autophagy and mitochondrion localization	CR_08170C		Ortholog(s) have protein C-terminal leucine carboxyl O-methyltransferase activity, role in C-terminal protein methylation, cellular protein complex assembly, regulation of autophagy and mitochondrion localization	YDR435C	PPM1	Carboxyl methyltransferase; methylates the C terminus of the protein phosphatase 2A catalytic subunit (Pph21p or Pph22p), which is important for complex formation with regulatory subunits; required for methionine to inhibit autophagy and promote growth
	CAGL0C04895g	1.29918704086702		Ortholog(s) have mRNA binding, phosphatidylinositol-3-phosphatase activity, role in phosphatidylinositol dephosphorylation and cytosol localization	C1_08860C		Putative phosphatidylinositol 3-phosphate (PI3P) phosphatase; repressed by alpha pheromone in SpiderM medium	YJR110W	YMR1	Phosphatidylinositol 3-phosphate (PI3P) phosphatase; involved in various protein sorting pathways, including CVT targeting and endosome to vacuole transport; has similarity to the conserved myotubularin dual specificity phosphatase family
	CAGL0I08569g	1.65880953924168		Ortholog(s) have protein transporter activity and role in CVT pathway, ER to Golgi vesicle-mediated transport, macroautophagy, pexophagy, retrograde transport, vesicle recycling within Golgi	C1_07270W	SEC34	Ortholog(s) have protein transporter activity and role in CVT pathway, ER to Golgi vesicle-mediated transport, macroautophagy, pexophagy, retrograde transport, vesicle recycling within Golgi	YER157W	COG3	Essential component of the conserved oligomeric Golgi complex; a cytosolic tethering complex (Cog1p through Cog8p) that functions in protein trafficking to mediate fusion of transport vesicles to Golgi compartments
	CAGL0L04884g	1.67212401513436		Ortholog(s) have role in CVT pathway, ER to Golgi vesicle-mediated transport, macroautophagy, pexophagy, retrograde transport, vesicle recycling within Golgi	CR_02630C		Essential component of the conserved oligomeric Golgi complex; role in fusion of transport vesicles to Golgi compartments; rat catheter biofilm repressed	YGR120C	COG2	Essential component of the conserved oligomeric Golgi complex; a cytosolic tethering complex that functions in protein trafficking to mediate fusion of transport vesicles to Golgi compartments; the components of the Golgi complex are Gog1p through Cog8p
	CAGL0G01760g	1.86872277656798		Ortholog(s) have role in CVT pathway, establishment of cell polarity, filamentous growth of a population of unicellular organisms, macroautophagy, pexophagy, retrograde transport, vesicle recycling within Golgi	C2_05680W	COG4	Ortholog(s) have role in CVT pathway, establishment of cell polarity, filamentous growth of a population of unicellular organisms, macroautophagy, pexophagy, retrograde transport, vesicle recycling within Golgi	YPR105C	COG4	Essential component of the conserved oligomeric Golgi complex; a cytosolic tethering complex (Cog1p through Cog8p) that functions in protein trafficking to mediate fusion of transport vesicles to Golgi compartments
Protein metabolism	CAGL0G02563g	-2.42869068364828		Has domain(s) with predicted thiol-dependent ubiquitinyl hydrolase activity and role in protein deubiquitination, ubiquitin-dependent protein catabolic process
	CAGL0F02101g	-2.26170250116239		Ortholog(s) have peptidase activator activity, proteasome binding activity	C2_08010W	BLM3	Putative proteasome activator; binds core proteasome and stimulates proteasome-mediated protein degradation by inducing gate opening; ortholog of S. cerevisiae Blm10; transcript regulated by Nrg1 and Mig1	YFL007W	BLM10	Proteasome activator; binds the core proteasome (CP) and stimulates proteasome-mediated protein degradation by inducing gate opening; required for sequestering CP into proteasome storage granule (PSG) during quiescent phase and for nuclear import of CP in proliferating cells; required for resistance to bleomycin, may be involved in protecting against oxidative damage; similar to mammalian PA200
	CAGL0A02002g	-2.16138465339683		Ortholog of S. cerevisiae : YOL024W and Saccharomyces cerevisiae S288C : YOL024W				YOL024W	YOL024W	Putative protein of unknown function; predicted to have thiol-disulfide oxidoreductase active site; YOL024W has a paralog, IGD1, that arose from the whole genome duplication
	CAGL0L13409r	-1.93776426735069	RDN5-1	5S rRNA
	CAGL0L08448g	-1.8953457979669		Ortholog(s) have role in actin cytoskeleton organization, eisosome assembly, establishment of protein localization to plasma membrane and negative regulation of protein phosphorylation, more	C3_04910C	NCE102	Non classical protein export protein; localized to plasma membrane; Hap43-induced gene; flow model biofilm induced; Spider biofilm induced	YPR149W	NCE102	Protein of unknown function; contains transmembrane domains; involved in secretion of proteins that lack classical secretory signal sequences; component of the detergent-insoluble glycolipid-enriched complexes (DIGs); NCE102 has a paralog, FHN1, that arose from the whole genome duplication
	CAGL0I10494g	-1.89067946761028		Ortholog(s) have role in eisosome assembly, establishment of protein localization to plasma membrane and Golgi apparatus, eisosome, growing cell tip, membrane raft, plasma membrane localization				YGR131W	FHN1	Protein of unknown function; induced by ketoconazole; promoter region contains sterol regulatory element motif, which has been identified as a Upc2p-binding site; overexpression complements function of Nce102p in NCE102 deletion strain; FHN1 has a paralog, NCE102, that arose from the whole genome duplication
	CAGL0B03014g	-1.84452545132937		Has domain(s) with predicted transferase activity, transferring glycosyl groups activity and role in protein glycosylation
	CAGL0K12540g	-1.701669638175	HAC1	bZIP domain-containing transcription factor, activates transcription of genes involved in unfolded protein response; activation does not require cleavage of HAC1 mRNA by Ire1p	C1_06130C	HAC1	bZIP transcription factor; role in unfolded protein response and control of morphology; transcript undergoes atypical splicing at C terminus under ER stress; induced during mating and by caspofungin; mRNA binds She3; Spider biofilm induced	YFL031W	HAC1	Basic leucine zipper (bZIP) transcription factor (ATF/CREB1 homolog); regulates the unfolded protein response, via UPRE binding, and membrane biogenesis; ER stress-induced splicing pathway facilitates efficient Hac1p synthesis; two functional forms of Hac1p are produced; translation initiation is repressed under non-stress conditions; protein abundance increases in response to DNA replication str…
	CAGL0K00231g	-1.67559045073479		Ortholog(s) have 5-oxoprolinase (ATP-hydrolyzing) activity, role in glutathione metabolic process and cytosol localization	C2_02990C	HYU1	Putative hydantoin utilization protein A; induced upon adherence to polystyrene; regulated by Gcn2p and Gcn4p	YKL215C	OXP1	5-oxoprolinase; enzyme is ATP-dependent and functions as a dimer; similar to mouse Oplah gene; green fluorescent protein (GFP)-fusion protein localizes to the cytoplasm; protein abundance increases in response to DNA replication stress
	CAGL0B03311g	-1.67395702352457		Ortholog(s) have ubiquitin-protein transferase activity, role in SCF-dependent proteasomal ubiquitin-dependent protein catabolic process and SCF ubiquitin ligase complex localization	C6_03780C		Ortholog(s) have ubiquitin-protein transferase activity, role in SCF-dependent proteasomal ubiquitin-dependent protein catabolic process and SCF ubiquitin ligase complex localization	YBR280C	SAF1	F-Box protein involved in proteasome-dependent degradation of Aah1p; involved in proteasome-dependent degradation of Aah1p during entry of cells into quiescence; interacts with Skp1
	CAGL0L13398r	-1.41600171997373	RDN18-1	18S rRNA
	CAGL0M07403g	-1.35474194803536	OAZ1	Ortholog(s) have ornithine decarboxylase inhibitor activity and role in negative regulation of translational frameshifting, regulation of proteasomal protein catabolic process				YPL052W	OAZ1	Regulator of ornithine decarboxylase Spe1p; antizyme that binds to Spe1p to stimulate ubiquitin-independent degradation by the proteasome; binding of polyamines to nascent Oaz1p during translation stimulates +1 ribosomal frameshifting, allowing translation of full-length Oaz1p
	CAGL0M08844g	-1.35396447218357		Ortholog(s) have protein-lysine N-methyltransferase activity, role in peptidyl-lysine monomethylation, regulation of cytoplasmic translation in response to stress and nucleus localization	C5_03250W	RMS1	Putative lysine methyltransferase; Hap43-induced; protein induced during mating; possibly essential, disruptants not obtained by UAU1 method; rat catheter and Spider biofilm induced	YDR257C	RKM4	Ribosomal lysine methyltransferase; specific for monomethylation of Rpl42ap and Rpl42bp (lysine 55); nuclear SET-domain containing protein
	CAGL0L06600g	-1.34901023022937	NAS6	Regulatory, nonATPase subunit of the 26S proteasome	C3_04920C		Ortholog(s) have role in proteasome regulatory particle assembly, proteolysis and cytosol, nucleus, proteasome regulatory particle localization	YGR232W	NAS6	Evolutionarily conserved 19S regulatory particle assembly-chaperone; proteasome-interacting protein involved in the assembly of the base subcomplex of the 19S proteasomal regulatory particle (RP); ortholog of human oncoprotein gankyrin, also known as p28, which interacts with the Rb tumor suppressor and CDK4/6
	CAGL0L08954g	-1.26072341790204		Ortholog(s) have NEDD8 activating enzyme activity and role in protein neddylation	C5_01590W		Ortholog(s) have NEDD8 activating enzyme activity, role in protein neddylation and cytosol, nucleus localization	YPL003W	ULA1	Protein that activates Rub1p (NEDD8) before neddylation; acts together with Uba3p; may play a role in protein degradation
	CAGL0C00275g	-1.21805150803667	HSP31	Putative cysteine protease; protein differentially expressed in azole resistant strain; gene is upregulated in azole-resistant strain
	CAGL0H05181g	-1.20997399676424		Putative component of ESCRT-I complex involved in protein trafficking; gene is upregulated in azole-resistant strain	C2_08940C	VPS28	ESCRT I protein sorting complex subunit; involved in Rim8 processing and proteolytic activation of Rim101, which regulates pH response; role in echinocandin, azole sensitivity	YPL065W	VPS28	Component of the ESCRT-I complex; complex is involved in ubiquitin-dependent sorting of proteins into the endosome; conserved C-terminal domain interacts with ESCRT-III subunit Vps20p; other members include Stp22p, Srn2p, Vps28p, and Mvb12p
	CAGL0G03245g	-1.17593988192006		Ortholog(s) have role in cellular response to misfolded protein and mitochondrial outer membrane, nucleus localization	C1_14210C	IML2	Protein of unknown function; early-stage flow model biofilm induced; Hap43-repressed; Spider biofilm repressed	YJL082W	IML2	Protein required for clearance of inclusion bodies; localizes to the inclusion bodies formed under protein misfolding stress; the authentic, non-tagged protein is detected in highly purified mitochondria in high-throughput studies; protein abundance increases in response to DNA replication stress; IML2 has a paralog, YKR018C, that arose from the whole genome duplication
	CAGL0J11484g	-1.15684795743799	DUG3	Component of the Dug1p-Dug2p-Dug3p complex involved in glutathione degradation; required for glutathione utilization in C. glabrata when glutathione import is enabled by expression of the S. cerevisiae Opt1p transporter	C7_03020C	DUG3	Putative glutamine amidotransferase (GATase II); role in glutathione catabolism;	YNL191W	DUG3	Component of glutamine amidotransferase (GATase II); forms a complex with Dug2p to degrade glutathione (GSH) and other peptides containing a gamma-glu-X bond in an alternative pathway to GSH degradation by gamma-glutamyl transpeptidase (Ecm38p)
	CAGL0G01716g	-1.14991912121868		Has domain(s) with predicted ATP binding, protein kinase activity, protein tyrosine kinase activity and role in protein phosphorylation				YPR106W	ISR1	Predicted protein kinase; overexpression causes sensitivity to staurosporine, which is a potent inhibitor of protein kinase C
	CAGL0C00319g	-1.12669599750003		Ortholog(s) have carboxypeptidase activity, role in nitrogen compound metabolic process, proteolysis involved in cellular protein catabolic process and fungal-type vacuole lumen localization	C4_03050C		Ortholog(s) have carboxypeptidase activity, role in nitrogen compound metabolic process, proteolysis involved in cellular protein catabolic process and fungal-type vacuole lumen localization	YJL172W	CPS1	Vacuolar carboxypeptidase S; expression is induced under low-nitrogen conditions
	CAGL0L08426g	-1.12226475511345	SUE1	Ortholog(s) have role in protein catabolic process and mitochondrial envelope localization				YPR151C	SUE1	Protein required for degradation of unstable forms of cytochrome c; located in the mitochondria
	CAGL0G03905g	-1.11931290646839		Ortholog(s) have 2 iron, 2 sulfur cluster binding, iron ion binding, iron-sulfur transferase activity and role in biotin biosynthetic process, iron-sulfur cluster assembly, protein maturation by iron-sulfur cluster transfer	C6_02520W	ISA1	Putative mitochondrial iron-sulfur protein; alkaline repressed; induced in high iron; regulated by Sef1, Sfu1, Hap43; Spider biofilm induced	YLL027W	ISA1	Protein required for maturation of mitochondrial [4Fe-4S] proteins; functions in a complex with Isa2p and possibly Iba57p; isa1 deletion causes loss of mitochondrial DNA and respiratory deficiency; depletion reduces growth on nonfermentable carbon sources; functional ortholog of bacterial A-type ISC proteins; human ISCA1 can complement isa1 null mutant
	CAGL0F03707g	-1.10860632064295		Has domain(s) with predicted ATP binding, protein kinase activity, protein tyrosine kinase activity and role in protein phosphorylation
	CAGL0K01881g	-1.0947389488899		Ortholog(s) have SUMO binding, ubiquitin-protein transferase activity	C2_02240C	HEX3	Protein similar to S. cerevisiae Hex3p, which is involved in DNA damage response; transposon mutation affects filamentous growth	YDL013W	SLX5	Subunit of the Slx5-Slx8 SUMO-targeted Ub ligase (STUbL) complex; role in Ub-mediated degradation of histone variant Cse4p preventing mislocalization to euchromatin; role in proteolysis of spindle positioning protein Kar9p, and DNA repair proteins Rad52p and Rad57p; forms SUMO-dependent nuclear foci, including DNA repair centers; contains a RING domain and two SIM motifs; associates with the cent…
	CAGL0C04719g	-1.08992883790424		Ortholog(s) have structural molecule activity	C5_04580C		Ortholog(s) have structural molecule activity	YJR102C	VPS25	Component of the ESCRT-II complex; ESCRT-II is involved in ubiquitin-dependent sorting of proteins into the endosome
	CAGL0M04411g	-1.05250302407349		Ortholog(s) have S-adenosylmethionine-dependent methyltransferase activity and role in protein methylation	C2_02360C		Ortholog(s) have S-adenosylmethionine-dependent methyltransferase activity, role in protein methylation and cytosol, nucleus localization	YLR137W	RKM5	Protein lysine methyltransferase; monomethylates Lys-46 of the ribosomal large subunit Rpl1a/Rpl1b; member of the seven beta-strand methyltransferase superfamily; orthologs only found among fungal species
	CAGL0G04279g	-1.04481048305012		Has domain(s) with predicted transferase activity, transferring glycosyl groups activity and role in protein glycosylation
	CAGL0E03652g	-1.03779916796251	ISA1	Has domain(s) with predicted iron-sulfur cluster binding, structural molecule activity and role in iron-sulfur cluster assembly
	CAGL0B04675g	-1.01990347546214		Ortholog(s) have RNA binding, endoribonuclease activity, ribosome binding activity	CR_03070W	DOM34	Endonuclease involved in regulation of translation; stimulates translation of protein O-mannosyltransferase family which includes PMT1, PMT2, PMT4, PMT5, and PMT6; peloto ortholog; Hap43-repressed gene	YNL001W	DOM34	Protein that facilitates ribosomal subunit dissociation; Dom34-Hbs1 complex and Rli1p have roles in dissociating inactive ribosomes to facilitate translation restart, particularly ribosomes stalled in 3' UTRs; required for RNA cleavage in no-go decay, but reports conflict on endonuclease activity; Pelota ortholog; protein abundance increases in response to DNA replication stress; DOM34 has a para…
	CAGL0G09889g	1.00256939594295		Ortholog(s) have SUMO activating enzyme activity, role in protein sumoylation and SUMO activating enzyme complex, cytosol localization	CR_02770C		Ortholog(s) have SUMO activating enzyme activity, role in protein sumoylation and SUMO activating enzyme complex, cytosol localization	YPR180W	AOS1	Subunit of heterodimeric nuclear SUMO activating enzyme E1 with Uba2p; activates Smt3p (SUMO) before its conjugation to proteins (sumoylation), which may play a role in protein targeting; essential for viability; relocalizes to the cytosol in response to hypoxia
	CAGL0A01738g	1.00519139396706		Putative mannosyltransferase of cis-Golgi apparatus; gene is upregulated in azole-resistant strain	C3_06090C	OCH1	Alpha-1,6-mannosyltransferase; initiates N-glycan outer chain branch addition; similar to S. cerevisiae Och1p; required for wild-type virulence in mouse intravenous infection; fungal-specific (no human or murine homolog)	YGL038C	OCH1	Mannosyltransferase of the cis-Golgi apparatus; initiates the polymannose outer chain elongation of N-linked oligosaccharides of glycoproteins
	CAGL0M05489g	1.01110002584097		Has domain(s) with predicted mannosyltransferase activity, role in protein glycosylation and membrane localization
	CAGL0M09185g	1.05066030660885		Ortholog(s) have role in protein folding in endoplasmic reticulum and ER membrane protein complex, cell division site, cytosol, mitotic spindle pole body, nucleus localization	C5_04550W		Ortholog(s) have role in protein folding in endoplasmic reticulum and ER membrane protein complex, cell division site, cytosol, mitotic spindle pole body, nucleus localization	YJR088C	EMC2	Member of conserved ER transmembrane complex; required for efficient folding of proteins in the ER; null mutant displays induction of the unfolded protein response; homologous to worm Y57G7A.10/EMC-2, fly CG17556, human TTC35
	CAGL0M10769g	1.06304056323004		Ortholog(s) have alpha-1,6-mannosyltransferase activity, role in dolichol-linked oligosaccharide biosynthetic process, protein glycosylation and endoplasmic reticulum localization	C7_02970W	ECM39	Putative mannosyltransferase similar to S. cerevisiae Ecm39p, which has a role in Calcofluor white resistance; predicted Kex2p substrate; has HKEXRF motif	YNR030W	ALG12	Alpha-1,6-mannosyltransferase localized to the ER; responsible for addition of alpha-1,6 mannose to dolichol-linked Man7GlcNAc2; acts in the dolichol pathway for N-glycosylation; human homolog ALG12 complements yeast null mutant
	CAGL0F02805g	1.07062497228978		Ortholog(s) have protein C-terminal S-isoprenylcysteine carboxyl O-methyltransferase activity	C6_01120C		Ortholog(s) have protein C-terminal S-isoprenylcysteine carboxyl O-methyltransferase activity	YDR410C	STE14	Farnesyl cysteine-carboxyl methyltransferase; mediates the carboxyl methylation step during C-terminal CAAX motif processing of a-factor and RAS proteins in the endoplasmic reticulum, localizes to the ER membrane
	CAGL0J03300g	1.08837064209358		Ortholog(s) have aminopeptidase activity, role in protein processing, protein stabilization and extrinsic component of mitochondrial inner membrane, nucleus localization	C3_03560W		Ortholog(s) have aminopeptidase activity, role in protein processing, protein stabilization and extrinsic component of mitochondrial inner membrane, nucleus localization	YER078C	ICP55	Mitochondrial aminopeptidase; cleaves the N termini of at least 38 imported proteins after cleavage by the mitochondrial processing peptidase (MPP), thereby increasing their stability; member of the aminopeptidase P family
	CAGL0A00561g	1.09532045396951		Ortholog(s) have role in proteasome regulatory particle assembly, ubiquitin-dependent protein catabolic process and cytosol, nucleus localization				YGL004C	RPN14	Evolutionarily conserved 19S regulatory particle assembly-chaperone; proteasome-interacting protein involved in the assembly of the base subcomplex of the 19S proteasome regulatory particle (RP); null mutants accumulate ubiquitinated Gcn4p and display decreased 26S proteasome stability; interacts with Rpt5p
	CAGL0I02530g	1.13738543720348		Ortholog(s) have N,N-dimethylaniline monooxygenase activity, role in protein folding and cytosol, endoplasmic reticulum membrane, mitochondrion localization	C1_01190C		Flavin-containing monooxygenase; catalyzes oxidation of biological thiols to maintain the ER redox buffer ratio for correct folding of disulfide-bonded proteins; Spider biofilm repressed	YHR176W	FMO1	Flavin-containing monooxygenase; localized to the cytoplasmic face of the ER membrane; catalyzes oxidation of biological thiols to maintain the ER redox buffer ratio for correct folding of disulfide-bonded proteins
	CAGL0K08866g	1.16497309837012		Putative non-ATPase regulatory subunit of 26S proteasome; gene is upregulated in azole-resistant strain	C5_02030W	RPN8	Putative regulatory subunit of the 26S proteasome; mutation confers hypersensitivity to amphotericin B; regulated by Mig1, Gcn2 and Gcn4; Spider biofilm repressed	YOR261C	RPN8	Essential non-ATPase regulatory subunit of the 26S proteasome; has similarity to the human p40 proteasomal subunit and to another S. cerevisiae regulatory subunit, Rpn11p
	CAGL0M11616g	1.165291944239		Ortholog(s) have role in rRNA processing, ribosomal large subunit assembly and mitochondrion, mitotic spindle pole body, nucleoplasm, preribosome, large subunit precursor localization	C4_00970C	MDN1	Putative midasin, a very large dynein-related AAA-type ATPase; induced during the mating process	YLR106C	MDN1	Huge dynein-related AAA-type ATPase (midasin); forms extended pre-60S particle with the Rix1 complex (Rix1p-Ipi1p-Ipi3p); acts in removal of ribosomal biogenesis factors at successive steps of pre-60S assembly and export from nucleus
	CAGL0B03553g	1.16921126912571		Ortholog(s) have DNA-directed DNA polymerase activity, rDNA binding activity, role in transcription of nuclear large rRNA transcript from RNA polymerase I promoter and cytosol, nucleolus localization	C6_03120W	POL5	Putative DNA Polymerase phi; F-12/CO2 early biofilm induced	YEL055C	POL5	DNA Polymerase phi; has sequence similarity to the human MybBP1A and weak sequence similarity to B-type DNA polymerases, not required for chromosomal DNA replication; required for the synthesis of rRNA
	CAGL0I09548g	1.18619594456324		Ortholog(s) have structural constituent of ribosome activity and mitochondrial small ribosomal subunit localization	C6_02370C		Ortholog(s) have structural constituent of ribosome activity and mitochondrial small ribosomal subunit localization	YGL129C	RSM23	Mitochondrial ribosomal protein of the small subunit; has similarity to mammalian apoptosis mediator proteins; null mutation prevents induction of apoptosis by overproduction of metacaspase Mca1p
	CAGL0F02871g	1.2193893923304		Ortholog(s) have role in protein glycosylation, protein retention in ER lumen and fungal-type vacuole membrane localization	C1_07930C	ERD1	Putative membrane protein required for the retention of lumenal endoplasmic reticulum proteins; rat catheter biofilm induced	YDR414C	ERD1	Predicted membrane protein required for lumenal ER protein retention; mutants secrete the endogenous ER protein, BiP (Kar2p)
	CAGL0I00682g	1.22751508039949		Ortholog(s) have endopeptidase activity, role in protein processing involved in protein targeting to mitochondrion and mitochondrial inner membrane peptidase complex localization	C1_03610C	IMP1	Predicted subunit of the mitochondrial inner membrane peptidase complex involved in protein targeting to mitochondria	YMR150C	IMP1	Catalytic subunit of mitochondrial inner membrane peptidase complex; required for maturation of mitochondrial proteins of the intermembrane space; complex contains two catalytic subunits (Imp1p and Imp2p that differ in substrate specificty) and Som1p
	CAGL0E05698g	1.24277721962164		Ortholog(s) have protein-lysine N-methyltransferase activity, role in peptidyl-lysine dimethylation, peptidyl-lysine monomethylation and cytosol, nucleus localization	CR_09310W		Ortholog(s) have protein-lysine N-methyltransferase activity, role in peptidyl-lysine dimethylation, peptidyl-lysine monomethylation and cytoplasm, nucleus localization	YPL208W	RKM1	SET-domain lysine-N-methyltransferase; catalyzes the formation of dimethyllysine residues on the large ribosomal subunit proteins L23 (Rpl23Ap and Rpl23Bp) and monomethyllysine residues on L18 (Rps18Ap and Rps18Bp)
	CAGL0D04796g	1.24712350200863		Ortholog(s) have peptide alpha-N-acetyltransferase activity	C1_06650W		Ortholog(s) have peptide alpha-N-acetyltransferase activity	YPR131C	NAT3	Catalytic subunit of the NatB N-terminal acetyltransferase; NatB catalyzes acetylation of the amino-terminal methionine residues of all proteins beginning with Met-Asp or Met-Glu and of some proteins beginning with Met-Asn or Met-Met
	CAGL0M00572g	1.2491688432716		Ortholog(s) have protein-lysine N-methyltransferase activity, role in peptidyl-lysine trimethylation and cytoplasm localization	C2_00620C		Ortholog(s) have protein-lysine N-methyltransferase activity, role in peptidyl-lysine trimethylation and cytoplasm localization	YJR129C	EFM3	S-adenosylmethionine-dependent methyltransferase; seven-beta-strand lysine methyltransferase which trimethylates translation elongation factor EF2 (Eft1p and Eft2p) at lysine 509; green fluorescent protein (GFP)-fusion protein localizes to the cytoplasm; ortholog of human gene FAM86A
	CAGL0J09834g	1.25342232207997		Ortholog(s) have protein serine/threonine phosphatase activity, role in protein dephosphorylation and mitochondrion localization	CR_05740C	PTC4	Type PP2C serine/threonine phosphatase; localized to mitochondria; mutation causes sensitivity to sodium, potassium and azole drugs; decreased expression in hyphae compared to yeast-form cells	YBR125C	PTC4	Cytoplasmic type 2C protein phosphatase (PP2C); identified as a high-copy number suppressor of cnb1 mpk1 synthetic lethality; overexpression decreases high-osmolarity induced Hog1p phosphorylation and kinase activity
	CAGL0M11572g	1.25802707020854		Ortholog(s) have role in ER-associated ubiquitin-dependent protein catabolic process and fungal-type vacuole localization	CR_05800C		Ortholog(s) have role in ER-associated ubiquitin-dependent protein catabolic process and fungal-type vacuole localization	YLR104W	LCL2	Putative protein of unknown function; mutant is deficient in cell wall mannosylphosphate and has long chronological lifespan; genetic interactions suggest a role in ER-associated protein degradation (ERAD); SWAT-GFP fusion protein localizes to the endoplasmic reticulum and vacuole, while mCherry fusion localizes to just the vacuole
	CAGL0I00616g	1.30311097495701		Ortholog(s) have protein transporter activity, role in posttranslational protein targeting to membrane, translocation and Sec62/Sec63 complex localization	C4_00630C	SEC72	ER protein-translocation complex component; regulated by Gcn4p; repressed in response to amino acid starvation (3-aminotriazole treatment); sumoylation target	YLR292C	SEC72	Non-essential subunit of Sec63 complex; with Sec61 complex, Kar2p/BiP and Lhs1p forms a channel competent for SRP-dependent and post-translational SRP-independent protein targeting and import into the ER; other members are Sec63p, Sec62p, and Sec66p
	CAGL0L00539g	1.39585252892135		Ortholog(s) have role in ER-associated ubiquitin-dependent protein catabolic process and cytoplasm localization				YMR184W	ADD37	Protein of unknown function; involved in ER-associated protein degradation; green fluorescent protein (GFP)-fusion protein localizes to the cytoplasm and is induced in response to the DNA-damaging agent MMS; YMR184W is not an essential gene; protein abundance increases in response to DNA replication stress
	CAGL0G05247g	1.42691157541295		Ortholog(s) have thiol-dependent ubiquitin-specific protease activity	C1_14000C	DOA4	Ortholog of S. cerevisiae Doa4;, a ubiquitin hydrolase involved in recycling ubiquitin from proteasome-bound ubiquitinated intermediates; oxidative stress-induced via Cap1; mutants are viable	YDR069C	DOA4	Ubiquitin hydrolase; deubiquitinates intralumenal vesicle (ILVs) cargo proteins; required for recycling ubiquitin from proteasome-bound ubiquitinated intermediates, acts at the late endosome/prevacuolar compartment to recover ubiquitin from ubiquitinated membrane proteins destined for the vacuole; DOA4 has a paralog, UBP5, that arose from the whole genome duplication
	CAGL0G04939g	1.49434260973039		Ortholog(s) have ubiquitin-protein transferase activity				YLR368W	MDM30	F-box component of an SCF ubiquitin protein ligase complex; associates with and is required for Fzo1p ubiquitination and for mitochondria fusion; stimulates nuclear export of specific mRNAs; promotes ubiquitin-mediated degradation of Gal4p in some strains
	CAGL0D01320g	1.49625751618535		Ortholog(s) have non-membrane spanning protein tyrosine phosphatase activity, role in peptidyl-tyrosine dephosphorylation and cytosol, nucleus localization	C1_08260C	LTP1	Putative protein phosphatase of the PTP family (tyrosine-specific), similar to S. cerevisiae Ltp1p	YPR073C	LTP1	Protein phosphotyrosine phosphatase of unknown cellular role; activated by adenine
	CAGL0G04917g	1.64550242001192		Ortholog(s) have role in intracellular sequestering of iron ion, iron-sulfur cluster assembly, protein maturation and mitochondrial matrix localization	C7_04010W	SSQ1	Protein involved in intracellular sequestering of iron ion and mitochondrial iron-sulfur cluster assembly; repression leads to defects in respiratory growth, activation of autophagy, attenuated virulence	YLR369W	SSQ1	Mitochondrial hsp70-type molecular chaperone; required for assembly of iron/sulfur clusters into proteins at a step after cluster synthesis, and for maturation of Yfh1p, which is a homolog of human frataxin implicated in Friedreich's ataxia
	CAGL0L07172g	1.66205472729484		Ortholog(s) have dolichyl-phosphate-mannose-protein mannosyltransferase Pmt5p-Pmt2p dimer complex, dolichyl-phosphate-mannose-protein mannosyltransferase Pmt5p-Pmt3p dimer complex localization				YDL093W	PMT5	Protein O-mannosyltransferase; transfers mannose residues from dolichyl phosphate-D-mannose to protein serine/threonine residues; acts in a complex with Pmt3p, can instead interact with Pmt2p in some conditions; target for new antifungals
	CAGL0H04301g	1.72661759018277		Ortholog(s) have peptidyl-prolyl cis-trans isomerase activity, role in apoptotic process, protein folding and biofilm matrix, mitochondrion localization	C2_02320C	CPR3	Putative peptidyl-prolyl cis-trans isomerase; macrophage-induced protein; protein levels decrease in stationary phase yeast cultures; predicted mitochondrial localization; overlaps orf19.1551	YML078W	CPR3	Mitochondrial peptidyl-prolyl cis-trans isomerase (cyclophilin); catalyzes the cis-trans isomerization of peptide bonds N-terminal to proline residues; involved in protein refolding after import into mitochondria
	CAGL0I01210g	1.89728937740392		Ortholog(s) have [cytochrome c]-lysine N-methyltransferase activity, role in peptidyl-lysine methylation and cytosol localization	CR_10360C	CTM1	Putative cytochrome c lysine methyltransferase; regulated by Gcn2 and Gcn4; transcript induced by Mnl1 under weak acid stress; early-stage flow model biofilm induced	YHR109W	CTM1	Cytochrome c lysine methyltransferase; trimethylates residue 72 of apo-cytochrome c (Cyc1p) in the cytosol; not required for normal respiratory growth
	CAGL0H00913g	1.91976348423173		Ortholog(s) have GTPase activator activity and role in protein folding, tubulin complex assembly				YPL241C	CIN2	GTPase-activating protein (GAP) for Cin4p; tubulin folding factor C involved in beta-tubulin (Tub2p) folding; mutants display increased chromosome loss and benomyl sensitivity; human homolog RP2 complements yeast null mutant
	CAGL0G09955g	1.93354422620183		Ortholog(s) have dolichyl-phosphate beta-D-mannosyltransferase activity	C1_08010W	DPM1	Dolichol-phosphate mannose synthase catalytic subunit; filament induced; Tup1-regulated; flow model and rat catheter biofilm repressed	YPR183W	DPM1	Dolichol phosphate mannose (Dol-P-Man) synthase of ER membrane; catalyzes formation of Dol-P-Man from Dol-P and GDP-Man; required for biosynthesis of glycosyl phosphatidylinositol (GPI) membrane anchor, as well as O-mannosylation and protein N- and O-linked glycosylation; human homolog DPM1 can complement yeast mutant strains
	CAGL0A04323g	1.94921154919611		Ortholog(s) have aminoacyl-tRNA hydrolase activity, role in negative regulation of proteasomal ubiquitin-dependent protein catabolic process and mitochondrial outer membrane localization	CR_01570W		Ortholog(s) have aminoacyl-tRNA hydrolase activity, role in negative regulation of proteasomal ubiquitin-dependent protein catabolic process and mitochondrial outer membrane localization	YBL057C	PTH2	One of two mitochondrially-localized peptidyl-tRNA hydrolases; negatively regulates the ubiquitin-proteasome pathway via interactions with ubiquitin-like ubiquitin-associated proteins; dispensable for cell growth; see also PTH1
	CAGL0K12848g	1.97728585570043	SEC53	Putative phosphomannomutase; protein differentially expressed in azole resistant strain	C1_02480W	PMM1	Phosphomannomutase; enzyme of O- and N-linked mannosylation; interconverts mannose-6-phosphate and mannose-l-phosphate; functional homolog of S. cerevisiae Sec53; antigenic in mice; Hap43-induced; flow model and Spider biofilm repressed	YFL045C	SEC53	Phosphomannomutase; involved in synthesis of GDP-mannose and dolichol-phosphate-mannose; required for folding and glycosylation of secretory proteins in the ER lumen
	CAGL0H00803g	2.13413516394614		Ortholog(s) have COPI-coated vesicle, Golgi apparatus, nuclear periphery localization	C7_01950W		Ortholog(s) have COPI-coated vesicle, Golgi apparatus, nuclear periphery localization	YPL246C	RBD2	Possible rhomboid protease; has similarity to eukaryotic rhomboid proteases including Pcp1p
	CAGL0D03278g	2.50023966226118		Ortholog(s) have role in chaperone-mediated protein complex assembly, nuclear-transcribed mRNA catabolic process, non-stop decay, proteasome assembly and intracellular localization	C1_12370W		Chaperone component; involved in assembly of alpha subunits into the 20S proteasome; flow model biofilm induced	YLR021W	IRC25	Component of a heterodimeric Poc4p-Irc25p chaperone; involved in assembly of alpha subunits into the 20S proteasome; may regulate formation of proteasome isoforms with alternative subunits under different conditions; upregulates proteasome assembly in response to the unfolded protein response activated by mistargeting of proteins (UPRam)
RNA metabolism and export	CAGL0I00902g	-2.10891690373031		Has domain(s) with predicted sequence-specific DNA binding, transcription factor activity, sequence-specific DNA binding, zinc ion binding activity and role in regulation of transcription, DNA-templated	C2_02530W		Has domain(s) with predicted sequence-specific DNA binding, transcription factor activity, sequence-specific DNA binding, zinc ion binding activity and role in regulation of transcription, DNA-templated	YMR136W	GAT2	Protein containing GATA family zinc finger motifs; similar to Gln3p and Dal80p; expression repressed by leucine
	CAGL0E06116g	-1.86576395268567		Ortholog(s) have sequence-specific DNA binding activity, role in positive regulation of transcription from RNA polymerase II promoter and cytosol, nuclear chromatin localization				YMR182C	RGM1	Putative zinc finger DNA binding transcription factor; contains two N-terminal C2H2 zinc fingers and C-terminal proline rich domain; overproduction impairs cell growth and induces expression of genes involved in monosaccharide catabolism and aldehyde metabolism; regulates expression of of Y' telomeric elements and subtelomeric COS genes; relocalizes to the cytosol in response to hypoxia; RGM1 has…
	CAGL0M01474g	-1.74011833563687		Ortholog(s) have RNA polymerase II transcription factor activity, TBP-class protein binding, RNA polymerase II transcription factor activity and TBP-class protein binding, more	C2_02810C	NCB2	Beta subunit of NC2, heterodimeric regulator of transcription; activates CDR1 transcription; possibly an essential gene, disruptants not obtained by UAU1 method; conditional mutants show decreased susceptibility to azoles	YDR397C	NCB2	Subunit of a heterodimeric NC2 transcription regulator complex; complex binds to TBP and can repress transcription by preventing preinitiation complex assembly or stimulate activated transcription; homologous to human NC2beta; complex also includes Bur6p
	CAGL0C03113g	-1.60970642136513		Ortholog(s) have RNA 7-methylguanosine cap binding, exoribonuclease activator activity, m7G(5')pppN diphosphatase activity	C7_01190W		Ortholog(s) have RNA 7-methylguanosine cap binding, exoribonuclease activator activity, m7G(5')pppN diphosphatase activity	YLR270W	DCS1	Non-essential hydrolase involved in mRNA decapping; activates Xrn1p; may function in a feedback mechanism to regulate deadenylation, contains pyrophosphatase activity and a HIT (histidine triad) motif; acts as inhibitor of neutral trehalase Nth1p; required for growth on glycerol medium; protein abundance increases in response to DNA replication stress; DCS1 has a paralog, DCS2, that arose from th…
	CAGL0B02387g	-1.42589007459862		Ortholog(s) have poly(A)-specific ribonuclease activity and role in polyadenylation-dependent RNA catabolic process				YML118W	NGL3	3'-5' exonuclease specific for poly-A RNAs; has a domain similar to a magnesium-dependent endonuclease motif in mRNA deadenylase Ccr4p; similar to Ngl1p; NGL3 has a paralog, NGL2, that arose from the whole genome duplication
	CAGL0K07964g	-1.37234014584708		Ortholog(s) have RNA polymerase II core binding, RNA polymerase II transcription factor activity, TBP-class protein binding, involved in preinitiation complex assembly and TBP-class protein binding, more	C1_03560C	SUA71	Transcription factor TFIIB; required for transcription initiation and start site selection by RNA polymerase II; downregulated during planktonic growth, whereas related SUA72 is induced; induced by Tbf1; rat catheter, Spider biofilm induced	YPR086W	SUA7	Transcription factor TFIIB; a general transcription factor required for transcription initiation and start site selection by RNA polymerase II
	CAGL0L05962g	-1.24425577490504		Ortholog(s) have mRNA binding, protein binding, bridging activity	C1_13570W	MPT5	Putative RNA-binding protein; Hap43p-repressed gene; protein induced during the mating process	YGL178W	MPT5	mRNA-binding protein of the PUF family; binds to specific mRNAs, often in the 3' UTR; has broad specificity and binds to more than 1000 mRNAs (16% of the transcriptome); recruits the CCR4-NOT deadenylase complex to mRNAs along with Dhh1p and Dcp1p to promote deadenylation, decapping, and decay; also interacts with the Caf20p translational initiation repressor, affecting its mRNA target specificity
	CAGL0C02541g	-1.22669205131432		Ortholog(s) have TFIID-class transcription factor binding, chromatin binding, core promoter binding, lysine-acetylated histone binding activity	C5_00200C	BDF1	Bromodomain transcription factor; repressed upon adherence to polystyrene; reduced mRNA abundance detected in null mutant; macrophage/pseudohyphal-repressed; possibly essential, disruptants not obtained by UAU1 method	YLR399C	BDF1	Protein involved in transcription initiation; functions at TATA-containing promoters; associates with the basal transcription factor TFIID; contains two bromodomains; corresponds to the C-terminal region of mammalian TAF1; redundant with Bdf2p; BDF1 has a paralog, BDF2, that arose from the whole genome duplication
	CAGL0J09592g	-1.20947342359728		Ortholog(s) have U6 snRNA binding, pre-mRNA binding activity and role in mRNA cis splicing, via spliceosome, spliceosomal snRNP assembly	C1_11280W		Ortholog(s) have U6 snRNA binding, pre-mRNA binding activity and role in mRNA cis splicing, via spliceosome, spliceosomal snRNP assembly	YDL209C	CWC2	Member of the NineTeen Complex (NTC); this complex contains Prp19p and stabilizes U6 snRNA in catalytic forms of the spliceosome containing U2, U5, and U6 snRNAs; binds directly to U6 snRNA; similar to S. pombe Cwf2
	CAGL0K04697g	-1.20413419995379		Ortholog(s) have sequence-specific DNA binding activity and mitochondrion, nucleus localization				YDL048C	STP4	Protein containing a Kruppel-type zinc-finger domain; similar to Stp1p, Stp2p; predicted transcription factor; relative distribution to the nucleus increases upon DNA replication stress; STP4 has a paralog, STP3, that arose from the whole genome duplication
	CAGL0H08541g	-1.18364496323359		Ortholog(s) have DNA binding, bending, sequence-specific DNA binding activity				YBR089C-A	NHP6B	High-mobility group (HMG) protein; binds to and remodels nucleosomes; involved in recruiting FACT and other chromatin remodelling complexes to the chromosomes; functionally redundant with Nhp6Ap; required for transcriptional initiation fidelity of some tRNA genes; homologous to mammalian HMGB1 and HMGB2; NHP6B has a paralog, NHP6A, that arose from the whole genome duplication
	CAGL0J00209g	-1.17549132510235		Ortholog(s) have tRNA guanylyltransferase activity, role in tRNA modification and cytosol, nucleus localization	C7_00560C	THG1	tRNA guanylyltransferase, with role in tRNA modification; catalyzes reverse (3'-5') nucleotide polymerization	YGR024C	THG1	tRNAHis guanylyltransferase; adds a guanosine residue to the 5' end of tRNAH is after transcription and RNase P cleavage; can also catalyze reverse (3'-5') polymerization with certain substrates in a template-dependent reaction; couples nuclear division and migration to cell budding and cytokinesis; essential enzyme conserved among eukaryotes
	CAGL0F09009g	-1.10161164284796		Ortholog(s) have role in snoRNA metabolic process and cytoplasm, nucleus localization	C2_07040W		Putative transcription factor with zinc finger DNA-binding motif	YHR040W	BCD1	Essential protein required for the accumulation of box C/D snoRNA
	CAGL0E00693g	-1.09590697444509		Ortholog(s) have histone acetyltransferase activity, role in histone acetylation and Ada2/Gcn5/Ada3 transcription activator complex, SAGA complex, SLIK (SAGA-like) complex localization	C1_03290W	NGG1	Ortholog(s) have histone acetyltransferase activity and role in histone acetylation, regulation of transcription from RNA polymerase II promoter	YDR176W	NGG1	Subunit of chromatin modifying histone acetyltransferase complexes; member of the ADA complex, the SAGA complex, and the SLIK complex; transcriptional regulator involved in glucose repression of Gal4p-regulated genes
	CAGL0F00803g	-1.09532734197174	GAL11B	Component of the transcriptional Mediator complex that provides interfaces between RNA polymerase II and upstream activator proteins; one of the two Gal11p homologs of S. cerevisiae Gal11p present in C. glabrata	C1_08270C	MED15	RNA polymerase II mediator complex subunit; possibly an essential gene, disruptants not obtained by UAU1 method	YOL051W	GAL11	Subunit of the RNA polymerase II mediator complex; associates with core polymerase subunits to form the RNA polymerase II holoenzyme; affects transcription by acting as target of activators and repressors; forms part of the tail domain of mediator
	CAGL0H05533g	-1.07680295469777		Ortholog(s) have ATPase activity, DNA binding, TBP-class protein binding activity	C2_04500W		Ortholog(s) have ATPase activity, DNA binding, TBP-class protein binding activity	YPL082C	MOT1	Essential protein involved in regulation of transcription; removes Spt15p (TBP) from DNA via its C-terminal ATPase activity; may have a role in ensuring that soluble TBP is available to bind TATA-less promoters; forms a complex with TBP that binds TATA DNA with high affinity but with altered specificity; the Mot1p-Spt15p-DNA ternary complex contains unbent DNA; coregulates transcription with Spt1…
	CAGL0H02101g	-1.06638135690904		Ortholog(s) have role in RNA metabolic process and biofilm matrix, cytoplasm, nucleus localization	C2_07630C		Possible stress protein; increased transcription associated with CDR1 and CDR2 overexpression or fluphenazine treatment; regulated by Sfu1, Nrg1, Tup1; stationary phase enriched protein; Spider biofilm induced	YHR087W	RTC3	Protein of unknown function involved in RNA metabolism; has structural similarity to SBDS, the human protein mutated in Shwachman-Diamond Syndrome (the yeast SBDS ortholog = SDO1); null mutation suppresses cdc13-1 temperature sensitivity; protein abundance increases in response to DNA replication stress
	CAGL0B00792g	-1.05086029465519		Ortholog(s) have mRNA binding activity, role in cytoplasmic translation and cytoplasmic stress granule, polysome localization				YCL037C	SRO9	Cytoplasmic RNA-binding protein; shuttles between nucleus and cytoplasm and is exported from the nucleus in an mRNA export-dependent manner; associates with translating ribosomes; involved in heme regulation of Hap1p as a component of the HMC complex, also involved in the organization of actin filaments; contains a La motif; SRO9 has a paralog, SLF1, that arose from the whole genome duplication
	CAGL0D04180g	-1.03421347329048		Ortholog(s) have U3 snoRNA binding, rRNA binding activity, role in maturation of SSU-rRNA from tricistronic rRNA transcript (SSU-rRNA, 5.8S rRNA, LSU-rRNA) and nucleolus, small-subunit processome localization	CR_06840W		Ortholog(s) have U3 snoRNA binding, rRNA binding activity, role in maturation of SSU-rRNA from tricistronic rRNA transcript (SSU-rRNA, 5.8S rRNA, LSU-rRNA) and nucleolus, small-subunit processome localization	YIL091C	UTP25	Nucleolar protein; required for 35S pre-RNA processing and 40S ribosomal subunit biogenesis
	CAGL0K09922g	-1.02928010556795		Ortholog(s) have RNA binding, flap-structured DNA binding activity, role in nuclear-transcribed mRNA poly(A) tail shortening, positive regulation of endodeoxyribonuclease activity and P-body, cytosol, nucleus localization	C1_02850W		Ortholog(s) have RNA binding, flap-structured DNA binding activity, role in nuclear-transcribed mRNA poly(A) tail shortening, positive regulation of endodeoxyribonuclease activity and P-body, cytosol, nucleus localization	YOR359W	VTS1	Flap-structured DNA-binding and RNA-binding protein; stimulates deadenylation-dependent mRNA degradation mediated by the CCR4-NOT deadenylase complex; member of the Smaug (Smg) family of post-transcriptional regulators which bind RNA through a conserved sterile alpha motif (SAM) domain that interacts with Smg recognition element (SREs) containing transcripts; stimulates Dna2p endonuclease activity
	CAGL0I09152g	-1.02556987719449		Ortholog(s) have rRNA primary transcript binding, ribonuclease MRP activity, ribonuclease P activity	C6_02910W	POP4	Ortholog of S. cerevisiae Pop4; a subunit of both RNase MRP and nuclear RNase P; filament induced; regulated by Nrg1, Tup1; likely essential, based on UAU1 strategy; rat catheter and Spider biofilm induced	YBR257W	POP4	Subunit of both RNase MRP and nuclear RNase P; RNase MRP cleaves pre-rRNA, while nuclear RNase P cleaves tRNA precursors to generate mature 5' ends and facilitates turnover of nuclear RNAs; binds to the RPR1 RNA subunit in RNase P
	CAGL0J02860g	1.00887722124586		Ortholog(s) have histone demethylase activity (H3-K36 specific), methylated histone binding activity and role in histone demethylation, positive regulation of transcription elongation from RNA polymerase II promoter	CR_00750C		Ortholog(s) have histone demethylase activity (H3-K36 specific), methylated histone binding activity and role in histone demethylation, positive regulation of transcription elongation from RNA polymerase II promoter	YER051W	JHD1	JmjC domain family histone demethylase specific for H3-K36; similar to proteins found in human, mouse, drosophila, X. laevis, C. elegans, and S. pombe
	CAGL0A02090g	1.01237613258131		Ortholog(s) have proline-tRNA ligase activity, role in prolyl-tRNA aminoacylation and cytosol, ribosome localization	C7_03660C		Protein with similarity to amino acid-tRNA ligase; stationary phase enriched protein; GlcNAc-induced protein	YHR020W	YHR020W	Prolyl-tRNA synthetase; N-terminal domain shows weak homology to prokaryotic posttransfer editing domain, but does not possess posttransfer editing activity; may interact with ribosomes, based on co-purification experiments
	CAGL0B02541g	1.02695422556755		Ortholog(s) have DNA translocase activity	C1_05780W		Putative RSC chromatin remodeling complex component; decreased transcription is observed upon fluphenazine treatment or in an azole-resistant strain that overexpresses CDR1 and CDR2	YML127W	RSC9	Component of the RSC chromatin remodeling complex; DNA-binding protein involved in the synthesis of rRNA and in transcriptional repression and activation of genes regulated by the Target of Rapamycin (TOR) pathway
	CAGL0M00990g	1.04316292915518		Ortholog(s) have ATP-dependent 5'-3' DNA helicase activity, ATP-dependent 5'-3' DNA/RNA helicase activity, mRNA binding, protein domain specific binding activity	C3_04760C	SEN1	Putative helicase; repressed by prostaglandins	YLR430W	SEN1	ATP-dependent 5' to 3' RNA/DNA and DNA helicase; subunit of the exosome-associated Nrd1p complex that mediates 3' end formation of snRNAs, snoRNAs, CUTs and some mRNAs; helicase-independent role in transcription-coupled repair; coordinates replication with transcription, associating with moving forks and preventing errors that occur when forks encounter transcribed regions; homolog of Senataxin, …
	CAGL0L06776g	1.07527607620609		Has domain(s) with predicted sequence-specific DNA binding, transcription factor activity, sequence-specific DNA binding, zinc ion binding activity and role in regulation of transcription, DNA-templated
	CAGL0J07524g	1.10963183775563		Ortholog(s) have RNA polymerase II activating transcription factor binding activity	C7_03320C	MED16	Putative RNA polymerase II mediator complex subunit; induced by nitric oxide	YNL236W	SIN4	Subunit of the RNA polymerase II mediator complex; associates with core polymerase subunits to form the RNA polymerase II holoenzyme; contributes to both postive and negative transcriptional regulation; dispensible for basal transcription
	CAGL0J04708g	1.11188100409605		Ortholog(s) have ATP-dependent RNA helicase activity and role in generation of catalytic spliceosome for first transesterification step, spliceosomal complex disassembly	C1_02900C		Ortholog(s) have ATP-dependent RNA helicase activity and role in generation of catalytic spliceosome for first transesterification step, spliceosomal complex disassembly	YLR424W	SPP382	Essential protein that forms a dimer with Ntr2p; also forms a trimer, with Ntr2p and Prp43p, that is involved in spliceosome disassembly; found also in a multisubunit complex with the splicing factor Clf1p; suppressor of prp38-1 mutation
	CAGL0I09636g	1.11539918375442		Has domain(s) with predicted RNA binding, double-stranded RNA binding, ribonuclease III activity and role in RNA processing
	CAGL0D01826g	1.13971629496585		Ortholog(s) have protein kinase regulator activity, role in regulation of translational elongation and cytosolic ribosome, extracellular region, mitochondrion localization	C2_10550C	GCN1	Ortholog(s) have protein kinase regulator activity, role in regulation of translational elongation and cytosolic ribosome, extracellular region, mitochondrion localization	YGL195W	GCN1	Positive regulator of the Gcn2p kinase activity; forms a complex with Gcn20p; proposed to stimulate Gcn2p activation by an uncharged tRNA
	CAGL0L12760g	1.16303070011461		Ortholog(s) have calcium ion binding, core promoter binding, guanyl-nucleotide exchange factor activity, phospholipid binding, transcription factor activity, sequence-specific DNA binding activity	C3_06010W	CAM1	Putative translation elongation factor eEF1 gamma; protein level decreased in stationary phase cultures; Spider biofilm repressed	YPL048W	CAM1	One of two isoforms of the gamma subunit of eEF1B; stimulates the release of GDP from eEF1A (Tef1p/Tef2p) post association with the ribosomal complex with eEF1Balpha subunit; nuclear protein required for transcription of MXR1; binds the MXR1 promoter in the presence of other nuclear factors; binds calcium and phospholipids
	CAGL0K05511g	1.17039104411524		Ortholog(s) have GTP binding, protein binding, bridging activity				YOR076C	SKI7	GTP-binding protein that couples the Ski complex and exosome; putative pseudo-translational GTPase involved in 3'-to-5' mRNA decay pathway; interacts with both the cytoplasmic exosome and the Ski complex; eRF3-like domain targets nonstop mRNA for degradation; null mutants have a superkiller phenotype; SKI7 has a paralog, HBS1, that arose from the whole genome duplication
	CAGL0L12034g	1.17861972074974		Ortholog(s) have DNA helicase activity, mRNA binding activity, role in regulation of translational termination and cytoplasmic stress granule, polysome localization	CR_06680C		Ortholog(s) have DNA helicase activity, mRNA binding activity, role in regulation of translational termination and cytoplasmic stress granule, polysome localization	YER176W	ECM32	DNA dependent ATPase/DNA helicase; helicase belonging to the Dna2p- and Nam7p-like family of helicases that is involved in modulating translation termination; interacts with the translation termination factors, localized to polysomes
	CAGL0H03025g	1.17908117932719		Ortholog(s) have poly(A)-specific ribonuclease activity, role in nuclear-transcribed mRNA poly(A) tail shortening, postreplication repair and PAN complex localization	C1_09070W		Ortholog(s) have poly(A)-specific ribonuclease activity, role in nuclear-transcribed mRNA poly(A) tail shortening, postreplication repair and PAN complex localization	YGL094C	PAN2	Catalytic subunit of the Pan2p-Pan3p poly(A)-ribonuclease complex; complex acts to control poly(A) tail length and regulate the stoichiometry and activity of postreplication repair complexes
	CAGL0M01540g	1.20240529798429	SPT3	Ortholog(s) have transcription cofactor activity	CR_10450C	SPT3	Functional homolog of S. cerevisiae Spt3p; required for virulence in mouse systemic infection; homozygous null mutant is hyperfilamentous	YDR392W	SPT3	Subunit of the SAGA and SAGA-like transcriptional regulatory complexes; interacts with Spt15p to activate transcription of some RNA polymerase II-dependent genes, also functions to inhibit transcription at some promoters; relocalizes to the cytosol in response to hypoxia
	CAGL0I07073g	1.22250899981639		Ortholog(s) have role in nuclear-transcribed mRNA catabolic process, 3'-5' exonucleolytic nonsense-mediated decay, nuclear-transcribed mRNA catabolic process, non-stop decay and protein complex assembly, more	C6_03890C	SKI8	Ortholog(s) have role in nuclear-transcribed mRNA catabolic process, 3'-5' exonucleolytic nonsense-mediated decay, nuclear-transcribed mRNA catabolic process, non-stop decay and protein complex assembly, more	YGL213C	SKI8	Ski complex component and WD-repeat protein; mediates 3'-5' RNA degradation by the cytoplasmic exosome; also required for meiotic double-strand break recombination; null mutants have superkiller phenotype
	CAGL0A02112g	1.22810636773045		Ortholog(s) have asparagine-tRNA ligase activity, role in asparaginyl-tRNA aminoacylation and cytosol localization	C7_03670W	DED81	Putative tRNA-Asn synthetase; genes encoding ribosomal subunits, translation factors, tRNA synthetases are downregulated upon phagocytosis by murine macrophage; protein enriched in stationary phase yeast cultures	YHR019C	DED81	Cytosolic asparaginyl-tRNA synthetase; required for protein synthesis, catalyzes the specific attachment of asparagine to its cognate tRNA
	CAGL0L04620g	1.23282596945016		Ortholog(s) have RNA polymerase II core promoter sequence-specific DNA binding activity, role in transcription from RNA polymerase II promoter and core mediator complex localization	C2_07500C	MED4	RNA polymerase II core mediator complex subunit	YOR174W	MED4	Subunit of the RNA polymerase II mediator complex; associates with core polymerase subunits to form the RNA polymerase II holoenzyme; essential for transcriptional regulation
	CAGL0J09878g	1.25127628672532		Ortholog(s) have DNA binding, bending, RNA polymerase III type 1 promoter sequence-specific DNA binding and RNA polymerase III type 2 promoter sequence-specific DNA binding, more	C4_01910W		Putative RNA polymerase III transcription initiation factor complex (TFIIIC) subunit; possibly an essential gene, disruptants not obtained by UAU1 method	YBR123C	TFC1	Subunit of RNA polymerase III transcription initiation factor complex; one of six subunits of the RNA polymerase III transcription initiation factor complex (TFIIIC); part of the TauA globular domain of TFIIIC that binds DNA at the BoxA promoter sites of tRNA and similar genes; human homolog is TFIIIC-63
	CAGL0D01386g	1.25462191056546	MED1	Ortholog(s) have role in negative regulation of transcription from RNA polymerase II promoter, positive regulation of transcription from RNA polymerase II promoter and core mediator complex localization				YPR070W	MED1	Subunit of the RNA polymerase II mediator complex; associates with core polymerase subunits to form the RNA polymerase II holoenzyme; essential for transcriptional regulation
	CAGL0I02860g	1.25462483292469		Ortholog(s) have tRNA binding activity, role in tRNA export from nucleus and cytoplasm, nuclear pore localization	CR_02250C	CEX1	Ortholog(s) have tRNA binding activity, role in tRNA export from nucleus and cytoplasm, nuclear pore localization	YOR112W	CEX1	Component of nuclear aminoacylation-dependent tRNA export pathway; cytoplasmic; interacts with nuclear pore component Nup116p; copurifies with tRNA export receptors Los1p and Msn5p, as well as eIF-1a; required for activation of RAN GTPase Gsp1p and dissociation of receptor-tRNA-Gsp1p export complex; recruits Rna1p from cytoplasm to NPC, facilitates Rna1p activation of Gsp1p GTPase activity by ena…
	CAGL0K05115g	1.26402101740605		Ortholog(s) have cyclin-dependent protein kinase activating kinase regulator activity, cyclin-dependent protein serine/threonine kinase activator activity	C1_01820C		Ortholog(s) have cyclin-dependent protein kinase activating kinase regulator activity, cyclin-dependent protein serine/threonine kinase activator activity	YPR025C	CCL1	Cyclin associated with protein kinase Kin28p; Kin28p is the TFIIH-associated carboxy-terminal domain (CTD) kinase involved in transcription initiation at RNA polymerase II promoters; human homolog CCNH allows growth of yeast ccl1 temperature-sensitive mutant at restrictive temperature
	CAGL0L03245g	1.26790121517512		Ortholog(s) have chromatin DNA binding activity and role in positive regulation of transcription from RNA polymerase II promoter, tRNA modification, tRNA threonylcarbamoyladenosine metabolic process, telomere maintenance via recombination	C4_04920W		Ortholog(s) have chromatin DNA binding activity and role in positive regulation of transcription from RNA polymerase II promoter, tRNA modification, tRNA threonylcarbamoyladenosine metabolic process, telomere maintenance via recombination	YKR038C	KAE1	Highly conserved ATPase of HSP70/DnaK family; essential functional component of the EKC/KEOPS complex, with Bud32p, Cgi121p, Pcc1p, and Gon7p; EKC/KEOPS complex is required for t6A tRNA modification and telomeric TG1-3 recombination; may have role in transcription
	CAGL0F07469g	1.29854853888214		Ortholog(s) have mRNA binding activity, role in aerobic respiration, regulation of mRNA stability, translational initiation and extrinsic component of mitochondrial inner membrane localization				YGL107C	RMD9	Mitochondrial protein required for respiratory growth; mutant phenotype and genetic interactions suggest a role in delivering mt mRNAs to ribosomes; located on matrix face of the inner membrane and loosely associated with mitoribosomes; RMD9 has a paralog, YBR238C, that arose from the whole genome duplication
	CAGL0K09064g	1.30275117582614		Ortholog(s) have thiosulfate sulfurtransferase activity, role in tRNA wobble position uridine thiolation and mitochondrion localization	C2_09960W		Ortholog(s) have thiosulfate sulfurtransferase activity, role in tRNA wobble position uridine thiolation and mitochondrion localization	YOR251C	TUM1	Rhodanese domain sulfur transferase; accepts persulfite from Nfs1p and transfers it to Uba4p in the pathway for 2-thiolation of the wobble uridine base of tRNAs; also stimulates sulfur transfer by Nfs1p; may be mitochondrially localized
	CAGL0D01430g	1.34076607705236		Ortholog(s) have protein deacetylase activity and role in histone H4 deacetylation, peptidyl-lysine deacetylation, positive regulation of transcription from RNA polymerase II promoter, transfer RNA gene-mediated silencing	C4_06010C	HOS1	Histone deacetylase; similar to S. cerevisiae Hos1; has conserved deacetylation motif; slightly greater expression in white cells than in opaque cells	YPR068C	HOS1	Class I histone deacetylase (HDAC) family member; deacetylates Smc3p on lysine residues at anaphase onset; has sequence similarity to Hda1p, Rpd3p, Hos2p, and Hos3p; interacts with the Tup1p-Ssn6p corepressor complex
	CAGL0F08701g	1.35670719778838		Ortholog(s) have second spliceosomal transesterification activity and role in generation of catalytic spliceosome for second transesterification step, nuclear retention of unspliced pre-mRNA at the site of transcription	C2_00200W		snRNP U5 splicing factor component; involved in positioning the 3' splice site during the 2nd catalytic step of splicing; Spider biofilm induced	YGR006W	PRP18	Splicing factor and component of snRNP U5; factor involved in the positioning of the 3' splice site during the second catalytic step of splicing; interacts with Slu7p
	CAGL0K03531g	1.35731833733861		Ortholog(s) have TFIIH-class transcription factor binding, transcription factor activity, TFIIH-class transcription factor recruiting activity	C7_01290W	MED11	Subunit of the RNA polymerase II mediator complex	YMR112C	MED11	Subunit of the RNA polymerase II mediator complex; associates with core polymerase subunits to form the RNA polymerase II holoenzyme; essential protein
	CAGL0M05797g	1.3661753525016		Ortholog(s) have pseudouridine synthase activity, role in mRNA pseudouridine synthesis, tRNA pseudouridine synthesis and mitochondrion localization				YGL063W	PUS2	Mitochondrial tRNA:pseudouridine synthase; acts at positions 27 and 28, but not at position 72; efficiently and rapidly targeted to mitochondria, specifically dedicated to mitochondrial tRNA modification; mutation also affects pseudouridylation of some nuclear-encoded mRNAs; PUS2 has a paralog, PUS1, that arose from the whole genome duplication
	CAGL0A02860g	1.39529176217834		Ortholog(s) have 5'-3' exonuclease activity, role in deadenylation-dependent decapping of nuclear-transcribed mRNA and cytoplasm localization	CR_05160C		S. cerevisiae ortholog YDR370C/DXO1 has decapping and 5&#8242;-3&#8242; exoRNase activity; decreased transcription is observed upon fluphenazine treatment or in an azole-resistant strain that overexpresses CDR1 and CDR2	YDR370C	DXO1	mRNA 5'-end-capping quality-control protein; has distributive, 5'-3' exoRNase activity; similar to Rai1p;
	CAGL0I09900g	1.40389369812017		Ortholog(s) have RNA binding activity, role in mRNA splicing, via spliceosome and U2 snRNP, U2-type prespliceosome, cytosol localization	C2_07060W		Ortholog(s) have RNA binding activity, role in mRNA splicing, via spliceosome and U2 snRNP, U2-type prespliceosome, cytosol localization	YOR319W	HSH49	U2-snRNP associated splicing factor; similar to the mammalian splicing factor SAP49; proposed to function as a U2-snRNP assembly factor along with Hsh155p and binding partner Cus1p; contains two RNA recognition motifs (RRM)
	CAGL0I02684g	1.40747140148347		Ortholog(s) have endoribonuclease activity, role in rRNA processing and cytosol, nucleus localization	C6_02580W		Protein with a predicted role in 5.8S rRNA processing; flow model biofilm induced	YMR285C	NGL2	Protein involved in 5.8S rRNA processing; Ccr4p-like RNase required for correct 3'-end formation of 5.8S rRNA at site E; similar to Ngl1p; NGL2 has a paralog, NGL3, that arose from the whole genome duplication
	CAGL0F05225g	1.46182020585515		Ortholog(s) have role in generation of catalytic spliceosome for first transesterification step and U4/U6 x U5 tri-snRNP complex, cytosol localization				YBR152W	SPP381	mRNA splicing factor, component of U4/U6.U5 tri-snRNP; interacts genetically and physically with Prp38p; relocalizes to the cytosol in response to hypoxia
	CAGL0G10087g	1.46817654247833		Ortholog(s) have role in nuclear-transcribed mRNA catabolic process, 3'-5' exonucleolytic nonsense-mediated decay, nuclear-transcribed mRNA catabolic process, non-stop decay and Ski complex, cytosol localization	C1_09830W	SKI3	Ortholog(s) have role in nuclear-transcribed mRNA catabolic process, 3'-5' exonucleolytic nonsense-mediated decay, nuclear-transcribed mRNA catabolic process, non-stop decay and Ski complex, cytosol localization	YPR189W	SKI3	Ski complex component and TPR protein; mediates 3'-5' RNA degradation by the cytoplasmic exosome; null mutants have superkiller phenotype of increased viral dsRNAs and are synthetic lethal with mutations in 5'-3' mRNA decay; mutations in the human ortholog, TTC37, causes Syndromic diarrhea/Trichohepatoenteric (SD/THE) syndrome
	CAGL0A03630g	1.53120568517829		Ortholog(s) have chromatin insulator sequence binding, transcription factor activity, core RNA polymerase III binding activity and role in transcription initiation from RNA polymerase III promoter
	CAGL0D04136g	1.53870223835856		Has domain(s) with predicted RNA polymerase II transcription cofactor activity, role in regulation of transcription from RNA polymerase II promoter and mediator complex localization
	CAGL0E02315g	1.5618879428751		Ortholog(s) have chromatin binding activity	C3_03280C	HTA3	Putative histone H2A; amphotericin B repressed; flucytosine induced; RNA abundance regulated by tyrosol and cell density; Spider biofilm repressed	YOL012C	HTZ1	Histone variant H2AZ; exchanged for histone H2A in nucleosomes by the SWR1 complex; involved in transcriptional regulation through prevention of the spread of silent heterochromatin; Htz1p-containing nucleosomes facilitate RNA Pol II passage by affecting correct assembly and modification status of RNA Pol II elongation complexes and by favoring efficient nucleosome remodeling
	CAGL0M12749g	1.56208762468728		Putative shared subunit of Cop9 signalosome and eIF3; gene is upregulated in azole-resistant strain				YIL071C	PCI8	Possible shared subunit of Cop9 signalosome (CSN) and eIF3; binds eIF3b subunit Prt1p, has possible dual functions in transcriptional and translational control, contains a PCI (Proteasome-COP9 signalosome (CSN)-eIF3) domain
	CAGL0H08602g	1.5802572165011		Has domain(s) with predicted ATP binding, aminoacyl-tRNA ligase activity, magnesium ion binding, phenylalanine-tRNA ligase activity, tRNA binding activity and role in phenylalanyl-tRNA aminoacylation, tRNA aminoacylation, tRNA processing
	CAGL0F05731g	1.63638831691486		Ortholog(s) have G-protein beta/gamma-subunit complex binding activity, role in positive regulation of transcription from RNA polymerase II promoter by pheromones, protein folding and cytosol, nucleus localization				YDR183W	PLP1	Protein that interacts with CCT (chaperonin containing TCP-1) complex; has a role in actin and tubulin folding; has weak similarity to phosducins, which are G-protein regulators
	CAGL0J06974g	1.63718687451773		Ortholog(s) have histone deacetylase activity and role in histone deacetylation, positive regulation of transcription from RNA polymerase II promoter, regulation of transcription involved in G1/S transition of mitotic cell cycle	C4_02300W	HOS3	Histone deacetylase; similar to S. cerevisiae Hos3p; greater expression and longer mRNA in white cells, compared to opaque cells; has conserved deacetylation motif	YPL116W	HOS3	Trichostatin A-insensitive homodimeric histone deacetylase (HDAC); specificity in vitro for histones H3, H4, H2A, and H2B; similar to Hda1p, Rpd3p, Hos1p, and Hos2p; deletion results in increased histone acetylation at rDNA repeats
	CAGL0F01727g	1.66703078649666		Ortholog(s) have 3'-5'-exoribonuclease activity	C2_01580W	REX2	Putative 3'-5' RNA exonuclease with a predicted role in 3'-end processing of U4 and U5 snRNAs, 5S and 5.8S rRNAs; rat catheter biofilm induced	YLR059C	REX2	3'-5' RNA exonuclease; involved in 3'-end processing of U4 and U5 snRNAs, 5S and 5.8S rRNAs, and RNase P and RNase MRP RNA; localized to mitochondria and null suppresses escape of mtDNA to nucleus in yme1 yme2 mutants; RNase D exonuclease
	CAGL0I05104g	1.74050803719874		Ortholog(s) have mitochondrion localization	CR_01480W	PRS	Putative prolyl-tRNA synthetase; monofunctional Class II synthetase; gene is constitutively expressed	YER087W	AIM10	Protein with similarity to tRNA synthetases; non-tagged protein is detected in purified mitochondria; null mutant is viable and displays elevated frequency of mitochondrial genome loss
	CAGL0C02431g	1.79055352625234		Ortholog(s) have role in mRNA polyadenylation and cellular bud neck localization				YER032W	FIR1	Protein involved in 3' mRNA processing; interacts with Ref2p; APCC(Cdh1) substrate; potential Cdc28p substrate
	CAGL0L11066g	1.92880969193578		Ortholog(s) have G-protein beta/gamma-subunit complex binding, actin binding activity, role in positive regulation of transcription from RNA polymerase II promoter by pheromones, protein folding and cytoplasm localization	C2_10120W		Ortholog(s) have G-protein beta/gamma-subunit complex binding, actin binding activity, role in positive regulation of transcription from RNA polymerase II promoter by pheromones, protein folding and cytoplasm localization	YOR281C	PLP2	Protein that interacts with the CCT complex to stimulate actin folding; has similarity to phosducins; null mutant lethality is complemented by mouse phosducin-like protein MgcPhLP; CCT is short for chaperonin containing TCP-1; essential gene
	CAGL0M06963g	2.15539942445879		Ortholog(s) have role in tRNA export from nucleus and cytosol localization				YCR073W-A	SOL2	Protein with a possible role in tRNA export; shows similarity to 6-phosphogluconolactonase non-catalytic domains but does not exhibit this enzymatic activity; homologous to Sol3p and Sol4p; SOL2 has a paralog, SOL1, that arose from the whole genome duplication
	CAGL0J03014g	2.24906386201387		Ortholog(s) have role in regulation of transcription, DNA-templated and cytoplasm, nucleus localization				YER064C	VHR2	Non-essential nuclear protein; null mutation has global effects on transcription; VHR2 has a paralog, VHR1, that arose from the whole genome duplication; relative distribution to the nucleus increases upon DNA replication stress
	CAGL0I05764g	2.41072151756025		Ortholog(s) have repressing transcription factor binding, transcription factor activity, transcription factor binding activity and role in negative regulation of transcription involved in G1/S transition of mitotic cell cycle				YNR009W	NRM1	Transcriptional co-repressor of MBF-regulated gene expression; Nrm1p associates stably with promoters via MCB binding factor (MBF) to repress transcription upon exit from G1 phase
	CAGL0H01023g	2.53740566336854		Ortholog(s) have RNA-DNA hybrid ribonuclease activity, role in RNA catabolic process and nucleus, ribonuclease H2 complex localization	C2_09180W		Putative ribonuclease H2 subunit; required for RNase H2 activity; repressed in Spider biofilms by Bcr1, Tec1, Brg1, Rob1	YDR279W	RNH202	Ribonuclease H2 subunit; required for RNase H2 activity; role in ribonucleotide excision repair; related to human AGS2 that causes Aicardi-Goutieres syndrome
Cell cycle	CAGL0H10164g	-2.44283559729591		Ortholog(s) have role in mRNA methylation, meiotic nuclear division, negative regulation of pseudohyphal growth, premeiotic DNA replication and MIS complex localization	C5_05450C	MUM2	Protein similar to S. cerevisiae Mum2, a protein essential for meiotic DNA replication and sporulation; induced by alpha pheromone in SpiderM medium; transcript regulated by Tup1	YBR057C	MUM2	Protein essential for meiotic DNA replication and sporulation; cytoplasmic protein; subunit of the MIS complex which controls mRNA methylation during during the induction of sporulation; also interacts with Orc2p, which is a component of the origin recognition complex
	CAGL0G05544g	-2.29437709532326		Ortholog(s) have role in cell morphogenesis involved in conjugation with cellular fusion and cell surface, fungal-type cell wall, mating projection, plasma membrane localization	C2_09130C	IFF6	Putative GPI-anchored adhesin-like protein; opaque-specific transcript; macrophage-induced gene; Hap43-repressed gene; Spider biofilm induced	YDL223C	HBT1	Shmoo tip protein, substrate of Hub1p ubiquitin-like protein; mutants are defective for mating projection formation, thereby implicating Hbt1p in polarized cell morphogenesis; HBT1 has a paralog, YNL195C, that arose from the whole genome duplication
	CAGL0C02827g	-2.22393592427296		Ortholog(s) have cellular bud neck, cytoplasm, nucleus localization				YOR264W	DSE3	Daughter cell-specific protein, may help establish daughter fate; relocalizes from bud neck to cytoplasm upon DNA replication stress
	CAGL0L06512g	-2.16848853910589		Ortholog(s) have role in meiotic nuclear division				YGR230W	BNS1	Protein of unknown function; overexpression bypasses need for Spo12p, but not required for meiosis; BNS1 has a paralog, SPO12, that arose from the whole genome duplication
	CAGL0L12144g	-2.14360299201362		Ortholog(s) have role in actin filament bundle organization, cellular bud site selection, hyphal growth, positive regulation of establishment of bipolar cell polarity regulating cell shape	C1_12510W	RAX2	Plasma membrane protein involved in establishment of bud sites and linear direction of hyphal growth; filament induced, repressed by Rim101, Tup1; Hap43-induced; Spider biofilm induced	YLR084C	RAX2	N-glycosylated protein; involved in the maintenance of bud site selection during bipolar budding; localization requires Rax1p; RAX2 mRNA stability is regulated by Mpt5p
	CAGL0K04257g	-2.07404108030245	RME1	Ortholog(s) have RNA polymerase II core promoter proximal region sequence-specific DNA binding, RNA polymerase II transcription factor activity, sequence-specific DNA binding activity	C1_07330W	RME1	Zinc finger protein; controls meiosis in S. cerevisae; white-specific transcript; upregulation correlates with clinical development of fluconazole resistance; Upc2-regulated in hypoxia; flow model biofilm induced; Spider biofilm repressed	YGR044C	RME1	Zinc finger protein involved in control of meiosis; prevents meiosis by repressing IME1 expression and promotes mitosis by activating CLN2 expression; directly repressed by a1-alpha2 regulator; mediates cell type control of sporulation; relocalizes from nucleus to cytoplasm upon DNA replication stress
	CAGL0J04884g	-1.89487680274155		Ortholog(s) have role in sporulation resulting in formation of a cellular spore, ubiquitin-dependent protein catabolic process and nucleus localization				YJL048C	UBX6	UBX (ubiquitin regulatory X) domain-containing protein; interacts with Cdc48p, transcription is repressed when cells are grown in media containing inositol and choline; UBX6 has a paralog, UBX7, that arose from the whole genome duplication
	CAGL0D02244g	-1.7753854251276		Ortholog(s) have protein serine/threonine kinase activity	C2_07530C		Ortholog(s) have protein serine/threonine kinase activity	YOR351C	MEK1	Meiosis-specific serine/threonine protein kinase; functions in meiotic checkpoint, promotes recombination between homologous chromosomes by suppressing double strand break repair between sister chromatids; stabilizes Hop1-Thr318 phosphorylation to promote interhomolog recombination and checkpoint responses during meiosis
	CAGL0F04785g	-1.71603210887417		Ortholog(s) have role in cellular bud neck septin ring organization and cytoplasm localization				YIL135C	VHS2	Regulator of septin dynamics; involved in the regulation of septin dynamics at bud neck after mitotic entry, likely by stabilizing septin structure; regulated at post-translational level by cell cycle dependent phosphorylation; likely phosphorylated by Cdc28p and dephosphorylated by Cdc14p before cytokinesis; high-copy suppressor of synthetic lethality of sis2 sit4 double mutant; VHS2 has a paral…
	CAGL0D04686g	-1.61531593686151		Ortholog(s) have metalloendopeptidase activity, role in axial cellular bud site selection, cytogamy, peptide mating pheromone maturation involved in conjugation with cellular fusion and cellular bud neck, mating projection tip localization	CR_09470W	AXL1	Putative endoprotease; induced by alpha factor; transcript is upregulated in an RHE model of oral candidiasis and in clinical isolates from HIV+ patients with oral candidiasis	YPR122W	AXL1	Haploid specific endoprotease of a-factor mating pheromone; performs one of two N-terminal cleavages during maturation of a-factor mating pheromone; required for axial budding pattern of haploid cells
	CAGL0M01980g	-1.59727876258281		Ortholog(s) have role in meiotic mismatch repair, reciprocal meiotic recombination and MutLgamma complex, nucleus localization	C1_14400C	MLH3	Ortholog(s) have role in meiotic mismatch repair, reciprocal meiotic recombination and MutLgamma complex, nucleus localization	YPL164C	MLH3	Protein involved in DNA mismatch repair and meiotic recombination; involved in crossing-over during meiotic recombination; forms a complex with Mlh1p; mammalian homolog is implicated mammalian microsatellite instability
	CAGL0I04510g	-1.53899095806648		Ortholog(s) have cellular bud membrane, mating projection membrane localization	C5_03960W		Putative plasma membrane protein; in S. cerevisiae it is localized to the cell bud and mating projection membrane; repressed by alpha pheromone in SpiderM medium	YBR016W	YBR016W	Tail-anchored plasma membrane protein with a conserved CYSTM module; predicted to be palmitoylated; has similarity to hydrophilins, which are involved in the adaptive response to hyperosmotic conditions; YBR016W has a paralog, YDL012C, that arose from the whole genome duplication
	CAGL0J04290g	-1.50625655195691		Ortholog(s) have MAP kinase activity involved in conjugation with cellular fusion activity
	CAGL0M11990g	-1.37481727395254		Ortholog(s) have cyclin-dependent protein serine/threonine kinase regulator activity	C5_01100C	CLN3	G1 cyclin; depletion abolishes budding and causes hyphal growth defects; farnesol regulated, functional in S. cerevisiae; possibly essential (UAU1 method); other biofilm induced; Spider biofilm induced	YAL040C	CLN3	G1 cyclin involved in cell cycle progression; activates Cdc28p kinase to promote G1 to S phase transition; plays a role in regulating transcription of other G1 cyclins, CLN1 and CLN2; regulated by phosphorylation and proteolysis; acetyl-CoA induces CLN3 transcription in response to nutrient repletion to promote cell-cycle entry; cell cycle arrest phenotype of the cln1 cln2 cln3 triple null mutant…
	CAGL0M01364g	-1.35604615260362	CBF3D	Centromere binding factor 3d; kinetochore protein with homology to human SKP1	C1_07410C	SKP1	Putative subunit D of kinetochore protein complex CBF3; regulated by Gcn4p; repressed in response to amino acid starvation (3-aminotriazole treatment)	YDR328C	SKP1	Evolutionarily conserved kinetochore protein; part of multiple protein complexes, including the SCF ubiquitin ligase complex, the CBF3 complex that binds centromeric DNA, and the RAVE complex that regulates assembly of the V-ATPase; protein abundance increases in response to DNA replication stress
	CAGL0J02464g	-1.34286539097171		Ortholog(s) have SUMO-specific isopeptidase activity, role in chromosome condensation, mitotic spindle assembly checkpoint, plasmid maintenance, protein desumoylation and nucleus localization	C3_00280C	ULP3	SUMO deconjugation enzyme that removes the small ubiquitin-like modifier (SUMO) from proteins	YIL031W	ULP2	Peptidase that deconjugates Smt3/SUMO-1 peptides from proteins; plays a role in chromosome cohesion at centromeric regions and recovery from checkpoint arrest induced by DNA damage or DNA replication defects; potential Cdc28p substrate; human homolog PML implicated in promyelocytic leukemia can partially complement yeast null mutant
	CAGL0H09922g	-1.33841270681922		Ortholog(s) have protein phosphatase 1 binding, protein phosphatase regulator activity and role in ascospore wall assembly, regulation of phosphoprotein phosphatase activity				YBR045C	GIP1	Meiosis-specific regulatory subunit of the Glc7p protein phosphatase; regulates spore wall formation and septin organization, required for expression of some late meiotic genes and for normal localization of Glc7p
	CAGL0K11275g	-1.31806787101067		Ortholog(s) have protein kinase activity, role in G1/S transition of mitotic cell cycle, protein phosphorylation and cytoplasm localization				YDR247W	VHS1	Cytoplasmic serine/threonine protein kinase; identified as a high-copy suppressor of the synthetic lethality of a sis2 sit4 double mutant, suggesting a role in G1/S phase progression; VHS1 has a paralog, SKS1, that arose from the whole genome duplication
	CAGL0L06182g	-1.25886082717105		Ortholog(s) have protein phosphatase regulator activity	C2_01600C	CDC55	Ortholog(s) have protein phosphatase regulator activity, protein serine/threonine phosphatase activity	YGL190C	CDC55	Regulatory subunit B of protein phosphatase 2A (PP2A); Zds1p/2p-dependent localization to cytoplasm promotes mitotic entry; localization to nucleus prevents mitotic exit; required for correct nuclear division, chromosome segregation during achiasmate meiosis; maintains nucleolar sequestration of Cdc14p during early meiosis; limits formation of PP2A-Rts1p holocomplexes to ensure timely dissolution…
	CAGL0E01089g	-1.24246527558437		Ortholog(s) have role in adaptation to pheromone involved in conjugation with mutual genetic exchange, amino acid transmembrane transport and cellular response to biotic stimulus, more	C2_04060C	SSY1	Amino acid sensor; required for wild-type hyphal growth on solid serum or Lees media, not under all conditions; 12 predicted membrane spanning regions; Hap43-repressed; Spider biofilm induced	YDR160W	SSY1	Component of the SPS plasma membrane amino acid sensor system; senses external amino acid concentration and transmits intracellular signals that result in regulation of expression of amino acid permease genes; other members are Ssy1p, Ptr3p, and Ssy5p
	CAGL0L08712g	-1.17687937269258		Ortholog(s) have cyclin-dependent protein serine/threonine kinase inhibitor activity and role in negative regulation of cyclin-dependent protein serine/threonine kinase activity involved in G1/S transition of mitotic cell cycle	CR_03470W		Protein of unknown function; repressed by alpha pheromone in SpiderM medium; transcript induced by Mnl1 under weak acid stress	YPL014W	YPL014W	Cyclin-dependent kinase inhibitor; interacts with and inhibits the Cdc28p/Cln2p, G1/S phase cyclin-dependent kinase complex but not S-phase, or M-phase complexes; overexpression blocks cells in G1 phase and stabilizes the Cdc28p inhibitor Sic1p, while disruption accelerates the G1/S phase transition; phosphorylated during S phase in a Cdc28p-dependent manner; green fluorescent protein (GFP)-fusio…
	CAGL0C00671g	-1.16430532996076		Ortholog(s) have role in reciprocal meiotic recombination	C7_01070C		Ortholog(s) have role in reciprocal meiotic recombination	YLR219W	MSC3	Protein of unknown function; green fluorescent protein (GFP)-fusion protein localizes to the cell periphery; msc3 mutants are defective in directing meiotic recombination events to homologous chromatids; potential Cdc28p substrate; protein abundance increases in response to DNA replication stress
	CAGL0E02057g	-1.14629843718567		Ortholog(s) have role in adaptation of signaling pathway by response to pheromone involved in conjugation with cellular fusion and COP9 signalosome localization				YOL117W	RRI2	Subunit of the COP9 signalosome (CSN) complex; this complex cleaves the ubiquitin-like protein Nedd8 from SCF ubiquitin ligases; plays a role in the mating pheromone response
	CAGL0C04136g	-1.11080364760043		Ortholog(s) have role in histone H3-K79 methylation, sexual sporulation resulting in formation of a cellular spore, transfer RNA gene-mediated silencing and replication fork protection complex localization	C1_04240C	HHF1	Putative histone H4; repressed in fkh2 mutant; regulated by Efg1; fluconazole induced; amphotericin B repressed; farnesol regulated; colony morphology-related gene regulation by Ssn6; Hap43-induced; rat catheter and Spider biofilm repressed	YBR009C	HHF1	Histone H4; core histone protein required for chromatin assembly and chromosome function; one of two identical histone proteins (see also HHF2); contributes to telomeric silencing; N-terminal domain involved in maintaining genomic integrity
	CAGL0M02167g	-1.09968084328803		Ortholog(s) have fungal-type vacuole localization				YPL156C	PRM4	Pheromone-regulated protein proposed to be involved in mating; predicted to have 1 transmembrane segment; transcriptionally regulated by Ste12p during mating and by Cat8p during the diauxic shift
	CAGL0M13937g	-1.06764047932669		Ortholog(s) have enzyme activator activity, role in chromosome segregation and cytoplasm, nucleus localization	C4_02860W		Ortholog(s) have enzyme activator activity, role in chromosome segregation and cytoplasm, nucleus localization	YMR311C	GLC8	Regulatory subunit of protein phosphatase 1 (Glc7p); involved in glycogen metabolism and chromosome segregation; proposed to regulate Glc7p activity via conformational alteration; ortholog of the mammalian protein phosphatase inhibitor 2; protein abundance increases in response to DNA replication stress
	CAGL0J03696g	-1.02705579121686		Ortholog(s) have H4 histone acetyltransferase activity, histone acetyltransferase activity (H3-K4 specific) activity	C3_00490W	ESA1	Subunit of the NuA4 histone acetyltransferase complex; member of MYST family; Spider biofilm induced	YOR244W	ESA1	Catalytic subunit of the histone acetyltransferase complex (NuA4); acetylates four conserved internal lysines of histone H4 N-terminal tail and can acetylate histone H2A; master regulator of cellular acetylation balance; required for cell cycle progression and transcriptional silencing at the rDNA locus and regulation of autophagy; human ortholog TIP60/KAT5 is implicated in cancer and other disea…
	CAGL0G09020g	-1.02367454726294		Ortholog(s) have cAMP-dependent protein kinase activity	C2_07210C	TPK2	cAMP-dependent protein kinase catalytic subunit; isoform of Tpk1; involved in regulation of filamentation, phenotypic switching and mating; needed for epithelial cell damage, engulfment and oral virulence in mice	YPL203W	TPK2	cAMP-dependent protein kinase catalytic subunit; promotes vegetative growth in response to nutrients via the Ras-cAMP signaling pathway; partially redundant with Tpk1p and Tpk3p; localizes to P-bodies during stationary phase; relocalizes to the cytosol in response to hypoxia
	CAGL0H02805g	1.0042354993436		Ortholog(s) have ATPase activity, cohesin ATPase activity, double-stranded DNA binding, topological DNA entrapment activity	C3_02700W	SMC3	Protein similar to S. cerevisiae Smc3p, which is an ATPase involved in sister chromatid cohesion; likely to be essential for growth, based on an insertional mutagenesis strategy	YJL074C	SMC3	Subunit of the multiprotein cohesin complex; required for sister chromatid cohesion in mitotic cells; also required, with Rec8p, for cohesion and recombination during meiosis; phylogenetically conserved SMC chromosomal ATPase family member
	CAGL0C05599g	1.00991997949992		Ortholog(s) have role in actin cortical patch localization, actin cytoskeleton organization, barrier septum assembly, fungal-type cell wall biogenesis, regulation of cell shape
	CAGL0B00924g	1.02021102610901		Ortholog(s) have microtubule plus-end binding, protein homodimerization activity	C3_07770C		Ortholog(s) have microtubule binding, protein homodimerization activity	YCL029C	BIK1	Microtubule-associated protein; component of the interface between microtubules and kinetochore, involved in sister chromatid separation; essential in polyploid cells but not in haploid or diploid cells; ortholog of mammalian CLIP-170
	CAGL0J06688g	1.02587289971836		Ortholog(s) have role in cell aging, chromatin silencing at rDNA, establishment of cell polarity, positive regulation of G2/M transition of mitotic cell cycle, regulation of protein localization				YML109W	ZDS2	Protein with a role in regulating Swe1p-dependent polarized growth; involved in maintenance of Cdc55p in the cytoplasm where it promotes mitotic entry; interacts with silencing proteins at the telomere; implicated in the mitotic exit network through regulation of Cdc14p localization; ZDS2 has a paralog, ZDS1, that arose from the whole genome duplication
	CAGL0K05709g	1.03766727221045		Ortholog(s) have phospholipid binding, protein kinase activity	C1_11400C	GIN4	Autophosphorylated kinase; role in pseudohyphal-hyphal switch and cytokinesis; phosphorylates Cdc11p on S395; necessary for septin ring within germ tube but not for septin band at mother cell junction; physically associates with septins	YDR507C	GIN4	Protein kinase involved in bud growth and assembly of the septin ring; proposed to have kinase-dependent and kinase-independent activities; undergoes autophosphorylation; similar to Hsl1p; GIN4 has a paralog, KCC4, that arose from the whole genome duplication
	CAGL0M04235g	1.05045416759031		Ortholog(s) have ubiquitin-protein transferase activity and role in anaphase-promoting complex-dependent catabolic process, exit from mitosis, metaphase/anaphase transition of mitotic cell cycle, protein ubiquitination	C3_06810W		Ortholog(s) have ubiquitin-protein transferase activity and role in anaphase-promoting complex-dependent catabolic process, exit from mitosis, metaphase/anaphase transition of mitotic cell cycle, protein ubiquitination	YLR127C	APC2	Subunit of the Anaphase-Promoting Complex/Cyclosome (APC/C); which is a ubiquitin-protein ligase required for degradation of anaphase inhibitors, including mitotic cyclins, during the metaphase/anaphase transition; component of the catalytic core of the APC/C; has similarity to cullin Cdc53p
	CAGL0L01793g	1.0558310241225		Ortholog(s) have structural constituent of cytoskeleton activity, role in microtubule nucleation, spindle pole body duplication and central plaque of spindle pole body, intermediate layer of spindle pole body localization				YKL042W	SPC42	Central plaque component of spindle pole body (SPB); involved in SPB duplication, may facilitate attachment of the SPB to the nuclear membrane
	CAGL0K07111g	1.05881703023809		Ortholog(s) have microtubule plus-end binding activity	CR_06160C	DAD3	Subunit of the Dam1 (DASH) complex, which acts in chromosome segregation by coupling kinetochores to spindle microtubules	YBR233W-A	DAD3	Essential subunit of the Dam1 complex (aka DASH complex); complex couples kinetochores to the force produced by MT depolymerization thereby aiding in chromosome segregation; is transferred to the kinetochore prior to mitosis
	CAGL0G06336g	1.06713901538891		Ortholog(s) have actin filament binding, microfilament motor activity, role in endoplasmic reticulum inheritance, intracellular mRNA localization, mating type switching and cellular bud tip, filamentous actin, mitochondrion localization				YAL029C	MYO4	Type V myosin motor involved in actin-based transport of cargos; required for mRNA transport, including ASH1 mRNA, and facilitating the growth and movement of ER tubules into the growing bud along with She3p; MYO4 has a paralog, MYO2, that arose from the whole genome duplication
	CAGL0M02079g	1.07914101545805		Ortholog(s) have role in Rho protein signal transduction, establishment of cell polarity and cytoplasm, nucleus localization				YPL161C	BEM4	Protein involved in establishment of cell polarity and bud emergence; interacts with the Rho1p small GTP-binding protein and with the Rho-type GTPase Cdc42p; involved in maintenance of proper telomere length
	CAGL0C04851g	1.08668413182751		Ortholog(s) have role in chromosome segregation and nuclear MIS12/MIND complex localization	CR_01360W		Ortholog(s) have role in chromosome segregation and nuclear MIS12/MIND complex localization	YJR112W	NNF1	Essential component of the MIND kinetochore complex; joins kinetochore subunits contacting DNA to those contacting microtubules; required for accurate chromosome segregation; complex consists of Mtw1p Including Nnf1p-Nsl1p-Dsn1p (MIND)
	CAGL0A00231g	1.08678799631495		Ortholog(s) have protein kinase activity and role in protein phosphorylation				YGL021W	ALK1	Protein kinase; along with its paralog, ALK2, required for proper spindle positioning and nuclear segregation following mitotic arrest, proper organization of cell polarity factors in mitosis, proper localization of formins and polarity factors, and survival in cells that activate spindle assembly checkpoint; phosphorylated in response to DNA damage; ALK1 has a paralog, ALK2, that arose from the …
	CAGL0J02662g	1.08686095667141	IRC5	Ortholog(s) have role in mitotic recombination and nucleus localization	C3_01310W		Ortholog(s) have role in mitotic recombination and nucleus localization	YFR038W	IRC5	Putative ATPase containing the DEAD/H helicase-related sequence motif; null mutant displays increased levels of spontaneous Rad52p foci; SWAT-GFP and mCherry fusion proteins localize to the nucleus
	CAGL0D02684g	1.09822564441311		Ortholog(s) have role in activation of mitotic cell cycle spindle assembly checkpoint and attachment of mitotic spindle microtubules to kinetochore, more
	CAGL0K03333g	1.1023781369884		Ortholog(s) have role in establishment or maintenance of cell polarity, protein ubiquitination involved in ubiquitin-dependent protein catabolic process, sexual sporulation resulting in formation of a cellular spore	C3_06210C	MUB1	Predicted protein required for ubiquitination; role in meiosis, regulation of cell budding in S. cereviae; Spider biofilm induced	YMR100W	MUB1	MYND domain-containing protein; component of the Mub1p-Ubr2p-Rad6p ubiquitin ligase complex, required for ubiquitination and degradation of Rpn4p; interacts with Ubr2p (E3) and indirectly with Rad6p (E2); short-lived protein degraded in a Ubr2p/Rad6p dependent manner; proposed to function as both a partner and substrate of the Ubr2p/Rad6p ubiquitin ligase; similar to the A. nidulans samB gene
	CAGL0C03201g	1.11947215997819		Ortholog(s) have role in ascospore-type prospore membrane assembly, late endosome to vacuole transport, mitochondrion organization, protein retention in Golgi apparatus, protein targeting to vacuole	C4_06060W	VPS13	Putative vacuolar protein sorting-associated protein; gene used for multilocus sequence typing	YLL040C	VPS13	Protein involved in prospore membrane morphogenesis; peripheral membrane protein that localizes to the prospore membrane and at numerous membrane contact sites; involved in sporulation, vacuolar protein sorting, prospore membrane formation during sporulation, and protein-Golgi retention; required for mitochondrial integrity; contains a PH-like domain; homologous to human CHAC and COH1 which are i…
	CAGL0I10901g	1.1279887067971		Ortholog(s) have role in centromere clustering, chromosome segregation, meiotic nuclear division, mitotic spindle organization in nucleus, nuclear migration, positive regulation of exit from mitosis				YOR195W	SLK19	Kinetochore-associated protein; required for chromosome segregation and kinetochore clustering; required for normal segregation of chromosomes in meiosis and mitosis; component of the FEAR regulatory network, which promotes Cdc14p release from the nucleolus during anaphase; potential Cdc28p substrate
	CAGL0D04994g	1.12986838582874	KAR3	Minus-end-directed microtubule motor	C2_09370C	KAR3	Kinesin-like microtubule motor protein; required for nuclear fusion during mating; C-terminal motor domain; mutants are viable; null has high-frequency white-opaque switching phenotype	YPR141C	KAR3	Minus-end-directed microtubule motor; functions in mitosis and meiosis, localizes to the spindle pole body and localization is dependent on functional Cik1p, required for nuclear fusion during mating; potential Cdc28p substrate
	CAGL0H09042g	1.13926733274703		Ortholog(s) have structural constituent of cytoskeleton activity and role in establishment of mitotic spindle orientation, mitotic spindle orientation checkpoint, nuclear migration	C5_03380W	ARP1	Putative centractin; induced upon adherence to polystyrene	YHR129C	ARP1	Actin-related protein of the dynactin complex; required for spindle orientation and nuclear migration; forms actin-like short filament composed of 9 or 10 Arp1p monomers; putative ortholog of mammalian centractin
	CAGL0F04301g	1.14516979008366		Ortholog(s) have structural constituent of cytoskeleton activity, role in microtubule nucleation and spindle pole body localization	C1_07360W		Ortholog(s) have structural constituent of cytoskeleton activity, role in microtubule nucleation and spindle pole body localization	YBL034C	STU1	Component of the mitotic spindle; binds to interpolar microtubules via its association with beta-tubulin (Tub2p); required for interpolar microtubules to provide an outward force on the spindle poles
	CAGL0B03641g	1.16203376106346		Ortholog(s) have ATP-dependent microtubule motor activity, minus-end-directed, ATP-dependent microtubule motor activity, plus-end-directed activity				YEL061C	CIN8	Kinesin motor protein; involved in mitotic spindle assembly and chromosome segregation
	CAGL0A02552g	1.16218347577389		Has domain(s) with predicted GTP binding activity and role in cell cycle
	CAGL0I02288g	1.1764035627702		Ortholog(s) have cyclin binding, ubiquitin-protein transferase activity and role in anaphase-promoting complex-dependent catabolic process, positive regulation of mitotic metaphase/anaphase transition, protein ubiquitination	CR_08630W	CDC23	Similar to anaphase-promoting complex component; possibly transcriptionally regulated by Tac1p	YHR166C	CDC23	Subunit of the Anaphase-Promoting Complex/Cyclosome (APC/C); APC/C is a ubiquitin-protein ligase required for degradation of anaphase inhibitors, including mitotic cyclins, during the metaphase/anaphase transition
	CAGL0K06633g	1.1836691135389		Ortholog(s) have role in attachment of spindle microtubules to kinetochore, protein localization to kinetochore and COMA complex, cytoplasm, spindle pole body localization				YBR211C	AME1	Essential kinetochore protein associated with microtubules and SPBs; component of the kinetochore sub-complex COMA (Ctf19p, Okp1p, Mcm21p, Ame1p); involved in spindle checkpoint maintenance; orthologous to human centromere constitutive-associated network (CCAN) subunit CENP-U and fission yeast Mis17; relative distribution to the nucleus increases upon DNA replication stress
	CAGL0H00891g	1.1993699965151		Ortholog(s) have actin binding, calmodulin binding activity	C7_01840W	IQG1	Actomyosin ring component at bud neck; cell-cycle regulated ser phosphorylation at CDK sites regulate association with Bni1/Bnr1, Iqg1 degradation, and ring disassembly; mutation causes cytokinetic defects; rat catheter biofilm repressed	YPL242C	IQG1	Essential protein required for determination of budding pattern; promotes localization of axial markers Bud4p and Cdc12p and functionally interacts with Sec3p, localizes to the contractile ring during anaphase, member of the IQGAP family; relocalizes from bud neck to cytoplasm upon DNA replication stress
	CAGL0J10978g	1.20289533174209		Ortholog(s) have GTPase activator activity, Rho GTPase binding, phosphatidylinositol-4,5-bisphosphate binding activity				YDR309C	GIC2	Redundant rho-like GTPase Cdc42p effector; involved in initiation of budding and cellular polarization; interacts with Cdc42p via the Cdc42/Rac-interactive binding (CRIB) domain and with PI(4,5)P2 via a polybasic region; GIC2 has a paralog, GIC1, that arose from the whole genome duplication
	CAGL0M09207g	1.2029970595897		Ortholog(s) have signal transducer activity	C7_01730C	STE18	Protein similar to S. cerevisiae Ste18p; expressed in opaque or white MTLa/MTLa or MTLalpha/MTLalpha, but not MTLa/MTLalpha cells; MTLa1p, MTLalpha2p bind promoter region	YJR086W	STE18	G protein gamma subunit; forms a dimer with Ste4p to activate the mating signaling pathway, forms a heterotrimer with Gpa1p and Ste4p to dampen signaling; C-terminus is palmitoylated and farnesylated, which are required for normal signaling
	CAGL0G02123g	1.20885492878936		Ortholog(s) have role in regulation of transcription involved in G1/S transition of mitotic cell cycle and cytoplasm, nucleus localization				YKR077W	MSA2	Putative transcriptional activator; interacts with G1-specific transcription factor MBF and G1-specific promoters; MSA2 has a paralog, MSA1, that arose from the whole genome duplication
	CAGL0I02090g	1.2100166129014		Ortholog(s) have role in cytogamy, filamentous growth of a population of unicellular organisms, negative regulation of exit from mitosis, regulation of cell shape and regulation of cytokinesis, more	C1_00140W	KEL1	Kelch repeat domain-containing protein; localizes to sites of polarized growth; mutant colonies exhibit slightly decreased filamentation ratio; not required for buccal epithelial cell adherence or virulence in mice	YHR158C	KEL1	Protein required for proper cell fusion and cell morphology; forms a complex with Bud14p and Kel2p that regulates Bnr1p (formin) to affect actin cable assembly, cytokinesis, and polarized growth; functions in a complex with Kel2p to negatively regulate mitotic exit, interacts with Tem1p and Lte1p; localizes to regions of polarized growth; potential Cdc28p substrate
	CAGL0E02145g	1.21987555441342		Ortholog(s) have protein kinase activity and role in cell separation after cytokinesis, negative regulation of sterol import by negative regulation of transcription from RNA polymerase II promoter, protein phosphorylation, sterol import				YOL113W	SKM1	Member of the PAK family of serine/threonine protein kinases; similar to Ste20p; involved in down-regulation of sterol uptake; proposed to be a downstream effector of Cdc42p during polarized growth; SKM1 has a paralog, CLA4, that arose from the whole genome duplication
	CAGL0F04235g	1.22566776281736		Ortholog(s) have microtubule binding activity, role in mitotic spindle elongation, negative regulation of microtubule motor activity and astral microtubule, cellular bud neck, nuclear microtubule, spindle localization				YBL031W	SHE1	Mitotic spindle protein; interacts with components of the Dam1 (DASH) complex, its effector Sli15p, and microtubule-associated protein Bim1p; also localizes to nuclear microtubules and to the bud neck in a ring-shaped structure; inhibits dynein function
	CAGL0J11418g	1.23260044214875		Ortholog(s) have role in karyogamy involved in conjugation with cellular fusion, spindle pole body duplication and endoplasmic reticulum, half bridge of spindle pole body localization				YNL188W	KAR1	Protein involved in karyogamy and spindle pole body duplication; involved in karyogamy during mating; involved in spindle pole body duplication during mitosis; localizes to the half-bridge of the spindle pole body; interacts with Spc72p during karyogamy; also interacts with Cdc31p; essential gene
	CAGL0K12298g	1.23552664708096		Ortholog(s) have role in ascospore formation, establishment of meiotic sister chromatid cohesion, establishment of mitotic sister chromatid cohesion and maintenance of meiotic sister chromatid cohesion, more				YBR107C	IML3	Outer kinetochore protein and component of the Ctf19 complex; involved in the establishment of pericentromeric cohesion during mitosis; prevents non-disjunction of sister chromatids during meiosis II; forms a stable complex with Chl4p; required for localization of Sgo1p to pericentric sites during meiosis I; orthologous to human centromere constitutive-associated network (CCAN) subunit CENP-L and…
	CAGL0D04444g	1.24815375863721		Ortholog(s) have role in mitotic sister chromatid cohesion, negative regulation of chromosome condensation, negative regulation of maintenance of mitotic sister chromatid cohesion and nuclear cohesin complex localization				YDR014W	RAD61	Subunit of a complex that inhibits sister chromatid cohesion; also negatively regulates chromosome condensation; inhibited by Eco1p-acetylated cohesin subunits Smc3p and Mcd1p; binds Smc3p ATPase head of cohesin; related to the human Wapl protein that controls the association of cohesin with chromatin
	CAGL0J09328g	1.24828442009212		Ortholog(s) have cyclin-dependent protein serine/threonine kinase regulator activity	C1_08570C	PCL2	Cyclin homolog; reduced expression observed upon depletion of Cln3; farnesol regulated; periodic mRNA expression, peak at cell-cycle G1/S phase; Hap43-induced; rat catheter biofilm repressed	YDL127W	PCL2	Cyclin, interacts with cyclin-dependent kinase Pho85p; member of the Pcl1,2-like subfamily, involved in the regulation of polarized growth and morphogenesis and progression through the cell cycle; localizes to sites of polarized cell growth; PCL2 has a paralog, PCL9, that arose from the whole genome duplication
	CAGL0E03608g	1.25900995983549		Ortholog(s) have role in meiotic nuclear division, negative regulation of TOR signaling, negative regulation of small GTPase mediated signal transduction and positive regulation of autophagy, more	CR_08680C		Ortholog(s) have role in meiotic nuclear division, negative regulation of TOR signaling, negative regulation of small GTPase mediated signal transduction and positive regulation of autophagy, more	YHL023C	NPR3	Subunit of the Iml1p/SEACIT complex; SEACIT (Iml1p-Npr2p-Npr3p) is a subcomplex of SEAC, a coatomer-related complex that associates dynamically with the vacuole; Npr3p may have a structural or regulatory role, supporting Iml1p function as a GAP for the Rag family GTPase Gtr1p, and leading to inhibition of TORC1 signaling in response to amino acid deprivation; SEACIT is required for non-nitrogen-s…
	CAGL0H05027g	1.2647534620822		Ortholog(s) have role in DNA replication initiation, establishment of mitotic sister chromatid cohesion, mitotic spindle assembly checkpoint and condensed nuclear chromosome kinetochore localization	C6_03420W		Ortholog(s) have role in DNA replication initiation, establishment of mitotic sister chromatid cohesion, mitotic spindle assembly checkpoint and condensed nuclear chromosome kinetochore localization	YLR381W	CTF3	Outer kinetochore protein that forms a complex with Mcm16p and Mcm22p; may bind the kinetochore to spindle microtubules; required for the spindle assembly checkpoint; orthologous to human centromere constitutive-associated network (CCAN) subunit CENP-I and fission yeast mis6
	CAGL0M03729g	1.28784318520916		Ortholog(s) have protein serine/threonine kinase activity	C1_10210C	CLA4	Ste20p family Ser/Thr kinase required for wild-type filamentous growth, organ colonization and virulence in mouse systemic infection; role in chlamydospore formation; functional homolog of S. cerevisiae Cla4p; mutant caspofungin sensitive	YNL298W	CLA4	Cdc42p-activated signal transducing kinase; member of the PAK (p21-activated kinase) family, along with Ste20p and Skm1p; involved in septin ring assembly, vacuole inheritance, cytokinesis, sterol uptake regulation; phosphorylates Cdc3p and Cdc10p; CLA4 has a paralog, SKM1, that arose from the whole genome duplication
	CAGL0F05467g	1.29334226938568		Putative component of the spindle pole complex; gene is upregulated in azole-resistant strain	C1_03980W	SPC19	Essential subunit of the Dam1 (DASH) complex, which acts in chromosome segregation by coupling kinetochores to spindle microtubules	YDR201W	SPC19	Essential subunit of the Dam1 complex (aka DASH complex); complex couples kinetochores to the force produced by MT depolymerization thereby aiding in chromosome segregation; also localized to nuclear side of spindle pole body
	CAGL0J11638g	1.3086525598067		Ortholog(s) have centromeric DNA binding, enzyme activator activity, phosphoprotein binding, protein serine/threonine kinase activity	C1_00950C	CDC5	Polo-like kinase; member of conserved Mcm1 regulon; depletion causes defects in spindle elongation and Cdc35-dependent filamentation; virulence-group-correlated expression; likely essential (UAU1 method); Spider biofilm repressed	YMR001C	CDC5	Polo-like kinase; controls targeting and activation of Rho1p at cell division site via Rho1p guanine nucleotide exchange factors; regulates Spc72p; also functions in adaptation to DNA damage during meiosis; regulates the shape of the nucleus and expansion of the nuclear envelope during mitosis; similar to Xenopus Plx1 and S. pombe Plo1p; human homologs PLK1, PLK3 can each complement yeast cdc5 th…
	CAGL0M04257g	1.3371153524154		Ortholog(s) have NEDD8 transferase activity, cullin family protein binding, protein binding, bridging, ubiquitin binding, ubiquitin conjugating enzyme binding activity	C3_06800C		Ortholog(s) have NEDD8 transferase activity, cullin family protein binding, protein binding, bridging, ubiquitin binding, ubiquitin conjugating enzyme binding activity	YLR128W	DCN1	Scaffold-type E3 ligase; required for cullin neddylation and ubiquitin ligase activation; contains a ubiquitin-binding domain (UBA) for ubiquitin and Nedd8 (Rub1p) interaction and a PONY domain involved in cullin binding and neddylation
	CAGL0G06754g	1.35198228425095		Ortholog(s) have 1-phosphatidylinositol binding, GTPase activity, phosphatidylinositol-4-phosphate binding, phosphatidylinositol-5-phosphate binding, protein complex scaffold activity	CR_04570C	CDC10	Septin, required for wild-type cell, hyphal, or chlamydospore morphology; role in virulence and kidney tissue invasion in mouse infection; forms ring at sites of cell division and filaments in mature chlamydospore; Spider biofilm repressed	YCR002C	CDC10	Component of the septin ring, required for cytokinesis; septins are GTP-binding proteins that assemble into rod-like hetero-oligomers that can associate to form filaments; septin rings at the mother-bud neck act as scaffolds for recruiting cell division factors and as barriers to prevent diffusion of specific proteins between mother and daughter cells; N-terminus interacts with phosphatidylinosit…
	CAGL0B03091g	1.35409385277583		Ortholog(s) have role in cellular bud site selection, pseudohyphal growth and cellular bud tip, incipient cellular bud site, plasma membrane localization				YLR353W	BUD8	Protein involved in bud-site selection; diploid mutants display a unipolar budding pattern instead of the wild-type bipolar pattern, and bud at the proximal pole; BUD8 has a paralog, BUD9, that arose from the whole genome duplication
	CAGL0M00440g	1.35617293160969		Ortholog(s) have role in establishment of mitotic sister chromatid cohesion and condensed nuclear chromosome kinetochore localization				YJR135C	MCM22	Outer kinetochore protein and component of the Ctf3 subcomplex; binds to centromeric DNA in a Ctf19p-dependent manner; involved in chromosome segregation and minichromosome maintenance; orthologous to human centromere constitutive-associated network (CCAN) subunit CENP-K and fission yeast sim4
	CAGL0A04169g	1.35813274415267		Ortholog(s) have role in mitochondrion inheritance and cellular bud neck, incipient cellular bud site, mitochondrial outer membrane localization				YLR190W	MMR1	Phosphorylated protein of the mitochondrial outer membrane; localizes only to mitochondria of the bud; interacts with Myo2p to mediate mitochondrial distribution to buds; mRNA is targeted to the bud via the transport system involving She2p
[truncated: 329 more rows]
